# Supplementary material for: Digesting fossil infrastructure for cleaner energy transitions
Source: Research Square preprint supplement (doi:10.21203/rs.3.rs-6346491/v1), 2025-06-06
Supplement: Supplementary file 1 [file EAF_production_2024.xlsx]

## Sheet: EAF_prod_countries
country	Total steel production [Mt]	BOF %	EAF %	Other %	Mt EAF	source
Albania	0.362		100		0.362	GEM Steel Tracker
Algeria	4.52	16.5	83.5		3.7742	GEM Steel Tracker
Angola	0.27	100	0		0	https://intelpoint.co/insights/egypt-accounted-for-43-of-africas-crude-steel-production-in-2023/
Argentina	4.9	42.9	57.1		2.7979	https://worldsteel.org/data/world-steel-in-figures-2024/#crude-steel-production-by-process-2023
Australia	5.5	73.2	26.8		1.474	https://worldsteel.org/data/world-steel-in-figures-2024/#crude-steel-production-by-process-2023
Austria	7.1	90.7	9.3		0.6603	https://worldsteel.org/data/world-steel-in-figures-2024/#crude-steel-production-by-process-2023
Azerbaijan	0.35	0	100		0.35	GEM Steel Tracker
Bahrain	1.205		100		1.205	GEM Steel Tracker
Bangladesh	4.5		34	66	1.53	GEM Steel Tracker
Belarus	2.33		100		2.33	GEM Steel Tracker
Belgium	5.9	69.3	30.7		1.8113	https://worldsteel.org/data/world-steel-in-figures-2024/#crude-steel-production-by-process-2023
Bosnia and Herz.	0.6	100	0		0	GEM Steel Tracker
Brazil	31.8	76.2	22.5	1.3	7.155	https://worldsteel.org/data/world-steel-in-figures-2024/#crude-steel-production-by-process-2023
Bulgaria	0.5		100		0.5	https://worldsteel.org/data/world-steel-in-figures-2024/#crude-steel-production-by-process-2023
Canada	12.2	58.2	41.8		5.0996	https://worldsteel.org/data/world-steel-in-figures-2024/#crude-steel-production-by-process-2023
Chile	1.2	61.5	38.5		0.462	https://worldsteel.org/data/world-steel-in-figures-2024/#crude-steel-production-by-process-2023
China	1019.1	90.1	9.9		100.891	https://worldsteel.org/data/world-steel-in-figures-2024/#crude-steel-production-by-process-2023
Croatia	0.2		100		0.2	https://worldsteel.org/data/world-steel-in-figures-2024/#crude-steel-production-by-process-2023
Czechia	3.4	95.6	4.4		0.1496	https://worldsteel.org/data/world-steel-in-figures-2024/#crude-steel-production-by-process-2023
Egypt	10.4		100		10.4	https://worldsteel.org/data/world-steel-in-figures-2024/#crude-steel-production-by-process-2023
Finland	3.8	62.0	38		1.444	https://worldsteel.org/data/world-steel-in-figures-2024/#crude-steel-production-by-process-2023
France	10	59.2	40.8		4.08	https://worldsteel.org/data/world-steel-in-figures-2024/#crude-steel-production-by-process-2023
Germany	35.4	72.3	27.7		9.8058	https://worldsteel.org/data/world-steel-in-figures-2024/#crude-steel-production-by-process-2023
Ghana	0.245		100		1.2	GEM Steel Tracker
Greece	1.2		100		1.2	https://worldsteel.org/data/world-steel-in-figures-2024/#crude-steel-production-by-process-2023
Guatemala	0.245		100		0.245	GEM Steel Tracker
Hungary	0.5	52.3	47.7		0.2385	https://worldsteel.org/data/world-steel-in-figures-2024/#crude-steel-production-by-process-2023
India	140.8	43.6	26	28	79.4112	https://worldsteel.org/data/world-steel-in-figures-2024/#crude-steel-production-by-process-2023
Indonesia	17		20		3.4	https://energyandcleanair.org/wp/wp-content/uploads/2024/12/EN-Press-release_CREA_80-of-Indonesias-steel-industries-still-using-high-emissions-tech-lagging-global-and-regional-progress.pdf
Iran	31	7.9	92.1		28.551	https://worldsteel.org/data/world-steel-in-figures-2024/#crude-steel-production-by-process-2023
Iraq	3.02		100		3.02	GEM Steel Tracker
Italy	21.1	14.2	85.8		18.1038	https://worldsteel.org/data/world-steel-in-figures-2024/#crude-steel-production-by-process-2023
Japan	87	73.8	26.2		22.794	https://worldsteel.org/data/world-steel-in-figures-2024/#crude-steel-production-by-process-2023
Kazakhstan	4.1779	81.3	18.7		0.781267	GEM Steel Tracker
Kenya	1.585		100		1.585	GEM Steel Tracker
Kuwait	1.014		100		1.014	GEM Steel Tracker
Libya	0.871924		100		0.871924	GEM Steel Tracker
Luxembourg	1.9		100		1.9	https://worldsteel.org/data/world-steel-in-figures-2024/#crude-steel-production-by-process-2023
Malaysia	7.6		59		4.484	GEM Steel Tracker
Mexico	16.2	6.6	93.4		15.1308	https://worldsteel.org/data/world-steel-in-figures-2024/#crude-steel-production-by-process-2023
Moldova	0.4		100		0.4	GEM Steel Tracker
Morocco	1.415		100		1.415	https://worldsteel.org/data/world-steel-in-figures-2024/#crude-steel-production-by-process-2023
Netherlands	4.7	100.0	0		0	https://worldsteel.org/data/world-steel-in-figures-2024/#crude-steel-production-by-process-2023
New Zealand	0.6	100.0	0		0	https://worldsteel.org/data/world-steel-in-figures-2024/#crude-steel-production-by-process-2023
Nigeria	1.2	0	100		1.2	GEM Steel Tracker
North Korea	0.35		39		0.1365	GEM Steel Tracker
North Macedonia	0.305009		100		0.305009	GEM Steel Tracker
Norway	0.610106		100		0.610106	GEM Steel Tracker
Oman	1.69599		100		1.69599	GEM Steel Tracker
Pakistan	4.1	50.3	39	10.7	1.599	GEM Steel Tracker
Peru	1.59	46.5409	53.4591		0.85	GEM Steel Tracker
Philippines	1.9		100		1.9	GEM Steel Tracker
Poland	6.4	48.8	51.2		3.2768	https://worldsteel.org/data/world-steel-in-figures-2024/#crude-steel-production-by-process-2023
Portugal	2		100		2	https://worldsteel.org/data/world-steel-in-figures-2024/#crude-steel-production-by-process-2023
Qatar	1.17655		100		1.17655	GEM Steel Tracker
Romania	1.6	53.2	46.8		0.7488	https://worldsteel.org/data/world-steel-in-figures-2024/#crude-steel-production-by-process-2023
Russia	76	65.1	32	2.9	24.32	https://worldsteel.org/data/world-steel-in-figures-2024/#crude-steel-production-by-process-2023
Saudi Arabia	9.9		100		9.9	https://worldsteel.org/data/world-steel-in-figures-2024/#crude-steel-production-by-process-2023
Serbia	0.139272	81.5	18.5		0.0257653	GEM Steel Tracker
Singapore	0.3		100		0.3	GEM Steel Tracker
Slovakia	4.4	90.0	10		0.44	https://worldsteel.org/data/world-steel-in-figures-2024/#crude-steel-production-by-process-2023
Slovenia	0.5		100		0.5	https://worldsteel.org/data/world-steel-in-figures-2024/#crude-steel-production-by-process-2023
South Africa	4.9	56.8	43.2		2.1168	https://worldsteel.org/data/world-steel-in-figures-2024/#crude-steel-production-by-process-2023
South Korea	66.7	70.5	29.5		19.6765	https://worldsteel.org/data/world-steel-in-figures-2024/#crude-steel-production-by-process-2023
Spain	11.4	28.1	71.9		8.1966	https://worldsteel.org/data/world-steel-in-figures-2024/#crude-steel-production-by-process-2023
Sweden	4.3	68.6	31.4		1.3502	https://worldsteel.org/data/world-steel-in-figures-2024/#crude-steel-production-by-process-2023
Switzerland	1.2	0	100		1.2	https://worldsteel.org/data/world-steel-in-figures-2024/#crude-steel-production-by-process-2023
Taiwan	19.1	59.2	40.8		7.7928	https://worldsteel.org/data/world-steel-in-figures-2024/#crude-steel-production-by-process-2023
Thailand	4.925		91.9	8.1	4.52608	GEM Steel Tracker
Turkey	36.8934		68		25.0875	https://www.ugandainvest.go.ug/uganda-has-huge-investment-opportunities-in-iron-and-steel-sector/#:~:text=Uganda's%20steel%20production%20(for%20both,smelting%20in%20the%20induction%20furnaces.
Uganda	0.585		36		0.2106	https://www.ugandainvest.go.ug/uganda-has-huge-investment-opportunities-in-iron-and-steel-sector/#:~:text=Uganda's%20steel%20production%20(for%20both,smelting%20in%20the%20induction%20furnaces.
Ukraine	6.2	48.1	12.3	39.6	0.7626	https://www.ugandainvest.go.ug/uganda-has-huge-investment-opportunities-in-iron-and-steel-sector/#:~:text=Uganda's%20steel%20production%20(for%20both,smelting%20in%20the%20induction%20furnaces.
United Arab Emirates	3.72091		90	10	3.34882	GEM Steel Tracker
United Kingdom	5.6	79.6	20.4		1.1424	https://www.ugandainvest.go.ug/uganda-has-huge-investment-opportunities-in-iron-and-steel-sector/#:~:text=Uganda's%20steel%20production%20(for%20both,smelting%20in%20the%20induction%20furnaces.
United States of America	79.4515		70		55.6161	https://www.ugandainvest.go.ug/uganda-has-huge-investment-opportunities-in-iron-and-steel-sector/#:~:text=Uganda's%20steel%20production%20(for%20both,smelting%20in%20the%20induction%20furnaces.
Uzbekistan	1		100		1	GEM Steel Tracker
Venezuela	0.2		100		0.2	GEM Steel Tracker, https://tradingeconomics.com/venezuela/steel-production
Vietnam	22.07	65	35		7.7245	Worldsteel 2023, https://wtocenter.vn/file/19046/02_steelvietnam-steel-industry-overview-and-trends_vsa14.04.2023.pdf
European Union (27)	136.3	56.3	43.7		59.5631
Other Europe	45.8	37.1	62.9		28.8082
Russia & other CIS + Ukraine	85.8	63.7	33	3.3	28.314
Europe	267.9	55.3876	43.5555		116.685
North America	111.3	30.7	69.3		77.1309
South America	43.4	66.4	32.7		14.1918
Africa	21.1	13.3	86.7		18.2937
Middle East	50.4	5	95		47.88
Asia (except Middle East)	1383.8	81.3	18.4	0.3	254.619
Asia	1434.2	78.6187	21.0918		302.499
Oceania	6.1	75.8361	24.1639		1.474

## Sheet: metadata
Data	Worldsteel 2024
url 1	https://worldsteel.org/data/world-steel-in-figures-2024/#crude-steel-production-by-process-2023
url 2	https://worldsteel.org/data/annual-production-steel-data/?ind=P1_crude_steel_total_pub/CHN/IND
last access	2025-02-03
	https://static1.squarespace.com/static/5877e86f9de4bb8bce72105c/t/624ebc5e1f5e2f3078c53a07/1649327229553/Steel+climate+impact-benchmarking+report+7April2022.pdf
