# Supplementary material for: Digesting fossil infrastructure for cleaner energy transitions
Source: Research Square preprint supplement (doi:10.21203/rs.3.rs-6346491/v1), 2025-06-06
Supplement: Supplementary file 5 [file EUROSTAT_transport_mode_split.xlsx]

## Sheet: Sheet1
Code	Country	Rail	Roads	Inland waterways	Sea	Source	Year
AR	Armenia	43.53	56.47	0	0	Transport Data Dashboard | ITF	2021
AU	Australia	66.32	33.68	3.5	0	Transport Data Dashboard | ITF	2021
AT	Austria	30.1	67.6	2.3	0	Eurostat	2023
AZ	Azerbaijan	29.38	53.53	17.09	0	Transport Data Dashboard | ITF	2021
BE	Belgium	11.8333	76.9333	11.2333	0	Eurostat	2023
BG	Bulgaria	20.4667	51.2	28.3333	0	Eurostat	2023
CA	Canada	22.2	77.7	0	0	Road Transportation: Heavyweight of the Canadian Economy	2018
HR	Croatia	23.6667	69.8333	6.5	0	Eurostat	2023
CY	Cyprus	0	100	0	0	Eurostat	2023
CZ	Czechia	23.9333	76.0333	0.0333333	0	Eurostat	2023
DK	Denmark	10.3333	89.6667	0	0	Eurostat	2023
EE	Estonia	40.2333	59.7667	0	0	Eurostat	2023
EU27_2020	European Union - 27 countries (from 2020)	17.1667	77	5.83333	0	Eurostat	2023
EU28	European Union - 28 countries (2013-2020)	17	77.4	5.6	0	Eurostat	2023
FI	Finland	26.5667	73.1	0.333333	0	Eurostat	2023
FR	France	10.2333	87.5333	2.23333	0	Eurostat	2023
GE	Georgia	82.17	17.83	0	0	Transport Data Dashboard | ITF	2021
DE	Germany	18.4333	74	7.56667	0	Eurostat	2023
EL	Greece	2.86667	97.1333	1.42109e-14	0	Eurostat	2023
HU	Hungary	27.2667	67.8667	4.86667	0	Eurostat	2023
IC	Iceland	0	100	0	0	Transport Data Dashboard | ITF	2021
IE	Ireland	0.666667	99.3333	0	0	Eurostat	2023
IT	Italy	12.1333	87.8	0.0666667	0	Eurostat	2023
JP	Japan	7.45	92.55	0	0	Transport Data Dashboard | ITF	2021
KO	Korea	4.61	95.39	0	0	Transport Data Dashboard | ITF	2021
LV	Latvia	61.1667	38.8333	0	0	Eurostat	2023
LT	Lithuania	64.8667	35.1333	0	0	Eurostat	2023
LU	Luxembourg	6.66667	85.2333	8.1	0	Eurostat	2023
MT	Malta	0	100	0	0	Eurostat	2023
MX	Mexico	26.97	73.03	0	0	Transport Data Dashboard | ITF	2021
MO	Moldova	9.48	90.52	0	0	Transport Data Dashboard | ITF	2021
NL	Netherlands	6.3	51.8	41.9	0	Eurostat	2023
NZ	New Zealand	13.99	86.01	0	0	Transport Data Dashboard | ITF	2021
NM	North Macedonia	3.22	96.78	0	0	Transport Data Dashboard | ITF	2021
NO	Norway	15	85	0	0	Eurostat	2023
PL	Poland	22.8667	77.1333	0	0	Eurostat	2023
PT	Portugal	12.6333	87.3667	0	0	Eurostat	2023
RO	Romania	25.9667	46.7333	27.3	0	Eurostat	2023
SK	Slovakia	30.5333	66.0333	3.43333	0	Eurostat	2023
SI	Slovenia	34.5333	65.4667	0	0	Eurostat	2023
ES	Spain	4.4	95.6	0	0	Eurostat	2023
SE	Sweden	29.5333	70.3333	0.133333	0	Eurostat	2023
CH	Switzerland	33.4667	66.4333	0.1	0	Eurostat	2023
TU	Türkiye	4.84	95.16	0	0	Transport Data Dashboard | ITF	2021
UK	Ukraine	74.05	25.39	0.56	0	Transport Data Dashboard | ITF	2021
UK	United Kingdom	9.1	90.8	0.1	0	Eurostat	2023
US	United States	36.58	55.91	7.52	0	Transport Data Dashboard | ITF	2021
BR	Brasil	21	61	14	0	(PDF) Rail Transportation in Brazil : Challenges and Opportunities	2020
AG	Argentina	4	88	8	0	Modal repartition of internal freight movements in Argentina in 2018... | Download Scientific Diagram	2018
CN	China	21.6	42.68	35.72	0	Transport Data Dashboard | ITF	2019
RU	Russia	88.7456	9.01393	2.24046	0	OECD Data Explorer • Annual freight transport	2020
IN	India	21.14	78.72	0.14	0	Transport Data Dashboard | ITF	2017
PH	Phillipines	0	58	41.95	0	Green Freight and Logistics Policy Development in the Philippines	2012
SA	South Africa	31.4	59.6	0.8	0	Modal split of tonne-kilometres in South Africa | Download Scientific Diagram	2010
World	World	10	18	2	70	https://www.maritime-executive.com/article/global-freight-demand-to-triple-by-2050	-
