# Supplementary material for: Digesting fossil infrastructure for cleaner energy transitions
Source: Research Square preprint supplement (doi:10.21203/rs.3.rs-6346491/v1), 2025-06-06
Supplement: Supplementary file 9 [file additional_oil_and_gas_production_data.xlsx]

## Sheet: data
Unit ID	Unit name	Country	Wiki URL	Production/reserves	Fuel description	Reserves classification (original)	Quantity (original)	Units (original)	Data year	Quantity (converted)	Units (converted)
OG0001931	Buzzard		https://www.gem.wiki/Buzzard_Oil_and_Gas_Field_(United_Kingdom)	cumulative production	gas				2023	7129.77	million m³
OG0001931	Buzzard		https://www.gem.wiki/Buzzard_Oil_and_Gas_Field_(United_Kingdom)	cumulative production	oil				2023	1014.79	million bbl
OG0000474	Lacq		https://www.gem.wiki/Lacq_Gas_Field_(France)	cumulative production	gas				2023	288420	million m³
OG0000863	Tempa Rossa		https://www.gem.wiki/Tempa_Rossa_Oil_and_Gas_Field_(Italy)	cumulative production	oil				2023	51.035	million bbl
OG0000871	Vega		https://www.gem.wiki/Vega_Oil_and_Gas_Field_(Italy)	cumulative production	oil				2023	25.0271	million bbl
OG0000873	A12-FA		https://www.gem.wiki/A12-FA_Gas_Field_(Netherlands)	cumulative production	gas				2023	8493.57	million m³
OG0000875	A18-FA		https://www.gem.wiki/A18-FA_Gas_Field_(Netherlands)	cumulative production	gas				2023	4989.63	million m³
OG0000894	B13-FA		https://www.gem.wiki/B13-FA_Gas_Field_(Netherlands)	cumulative production	gas				2023	6973.55	million m³
OG0000920	Coevorden		https://www.gem.wiki/Coevorden_Oil_and_Gas_Field_(Netherlands)	cumulative production	condensate				2023	0.0797756	million bbl
OG0000920	Coevorden		https://www.gem.wiki/Coevorden_Oil_and_Gas_Field_(Netherlands)	cumulative production	gas				2023	35762.6	million m³
OG0000963	F02a-Hanze		https://www.gem.wiki/F02a-Hanze_Oil_and_Gas_Field_(Netherlands)	cumulative production	gas				2023	1167.62	million m³
OG0000963	F02a-Hanze		https://www.gem.wiki/F02a-Hanze_Oil_and_Gas_Field_(Netherlands)	cumulative production	oil				2023	73.9027	million bbl
OG0000966	F03-FB		https://www.gem.wiki/F03-FB_Oil_and_Gas_Field_(Netherlands)	cumulative production	gas				2023	16329.6	million m³
OG0000966	F03-FB		https://www.gem.wiki/F03-FB_Oil_and_Gas_Field_(Netherlands)	cumulative production	oil				2023	30.9889	million bbl
OG0000983	G14-A&B		https://www.gem.wiki/G14-A&B_Oil_and_Gas_Field_(Netherlands)	cumulative production	condensate				2023	0.00923433	million bbl
OG0000983	G14-A&B		https://www.gem.wiki/G14-A&B_Oil_and_Gas_Field_(Netherlands)	cumulative production	gas				2023	17557.5	million m³
OG0000985	G16a-A		https://www.gem.wiki/G16a-A_Oil_and_Gas_Field_(Netherlands)	cumulative production	condensate				2023	0.00116998	million bbl
OG0000985	G16a-A		https://www.gem.wiki/G16a-A_Oil_and_Gas_Field_(Netherlands)	cumulative production	gas				2023	3199.65	million m³
OG0000986	G16a-B		https://www.gem.wiki/G16a-B_Oil_and_Gas_Field_(Netherlands)	cumulative production	condensate				2023	0.000940421	million bbl
OG0000986	G16a-B		https://www.gem.wiki/G16a-B_Oil_and_Gas_Field_(Netherlands)	cumulative production	gas				2023	3690.83	million m³
OG0000989	G17a-S1		https://www.gem.wiki/G17a-S1_Oil_and_Gas_Field_(Netherlands)	cumulative production	condensate				2023	0.000581131	million bbl
OG0000989	G17a-S1		https://www.gem.wiki/G17a-S1_Oil_and_Gas_Field_(Netherlands)	cumulative production	gas				2023	3165.27	million m³
OG0000990	G17cd-A		https://www.gem.wiki/G17cd-A_Oil_and_Gas_Field_(Netherlands)	cumulative production	condensate				2023	0.00129357	million bbl
OG0000990	G17cd-A		https://www.gem.wiki/G17cd-A_Oil_and_Gas_Field_(Netherlands)	cumulative production	gas				2023	4663.13	million m³
OG0001014	Helder		https://www.gem.wiki/Helder_Oil_and_Gas_Field_(Netherlands)	cumulative production	gas				2023	350.278	million m³
OG0001014	Helder		https://www.gem.wiki/Helder_Oil_and_Gas_Field_(Netherlands)	cumulative production	oil				2023	41.2746	million bbl
OG0001023	J03-C		https://www.gem.wiki/J03-C_Oil_and_Gas_Field_(Netherlands)	cumulative production	condensate				2023	0.0178029	million bbl
OG0001023	J03-C		https://www.gem.wiki/J03-C_Oil_and_Gas_Field_(Netherlands)	cumulative production	gas				2023	4927.21	million m³
OG0001025	K01-A		https://www.gem.wiki/K01-A_Oil_and_Gas_Field_(Netherlands)	cumulative production	condensate				2023	0.0588186	million bbl
OG0001025	K01-A		https://www.gem.wiki/K01-A_Oil_and_Gas_Field_(Netherlands)	cumulative production	gas				2023	13189.6	million m³
OG0001027	K04-A		https://www.gem.wiki/K04-A_Oil_and_Gas_Field_(Netherlands)	cumulative production	condensate				2023	0.0172558	million bbl
OG0001027	K04-A		https://www.gem.wiki/K04-A_Oil_and_Gas_Field_(Netherlands)	cumulative production	gas				2023	6129.24	million m³
OG0001028	K04-E		https://www.gem.wiki/K04-E_Oil_and_Gas_Field_(Netherlands)	cumulative production	condensate				2023	0.012429	million bbl
OG0001028	K04-E		https://www.gem.wiki/K04-E_Oil_and_Gas_Field_(Netherlands)	cumulative production	gas				2023	4127.45	million m³
OG0001029	K04-N		https://www.gem.wiki/K04-N_Oil_and_Gas_Field_(Netherlands)	cumulative production	condensate				2023	0.017776	million bbl
OG0001029	K04-N		https://www.gem.wiki/K04-N_Oil_and_Gas_Field_(Netherlands)	cumulative production	gas				2023	6131.23	million m³
OG0001034	K05-C		https://www.gem.wiki/K05-C_Oil_and_Gas_Field_(Netherlands)	cumulative production	condensate				2023	0.0362767	million bbl
OG0001034	K05-C		https://www.gem.wiki/K05-C_Oil_and_Gas_Field_(Netherlands)	cumulative production	gas				2023	15296.6	million m³
OG0001037	K05-U		https://www.gem.wiki/K05-U_Oil_and_Gas_Field_(Netherlands)	cumulative production	condensate				2023	0.00393071	million bbl
OG0001037	K05-U		https://www.gem.wiki/K05-U_Oil_and_Gas_Field_(Netherlands)	cumulative production	gas				2023	1701.57	million m³
OG0001044	K06-D		https://www.gem.wiki/K06-D_Gas_Field_(Netherlands)	cumulative production	gas				2023	6757.2	million m³
OG0001046	K06-G		https://www.gem.wiki/K06-G_Oil_and_Gas_Field_(Netherlands)	cumulative production	condensate				2023	0.0188097	million bbl
OG0001046	K06-G		https://www.gem.wiki/K06-G_Oil_and_Gas_Field_(Netherlands)	cumulative production	gas				2023	5513.48	million m³
OG0001080	K12-G		https://www.gem.wiki/K12-G_Oil_and_Gas_Field_(Netherlands)	cumulative production	condensate				2023	0.0126067	million bbl
OG0001080	K12-G		https://www.gem.wiki/K12-G_Oil_and_Gas_Field_(Netherlands)	cumulative production	gas				2023	11801.1	million m³
OG0001094	K15-FA		https://www.gem.wiki/K15-FA_Oil_and_Gas_Field_(Netherlands)	cumulative production	condensate				2023	0.0246231	million bbl
OG0001094	K15-FA		https://www.gem.wiki/K15-FA_Oil_and_Gas_Field_(Netherlands)	cumulative production	gas				2023	14555.2	million m³
OG0001095	K15-FB		https://www.gem.wiki/K15-FB_Oil_and_Gas_Field_(Netherlands)	cumulative production	condensate				2023	0.00154523	million bbl
OG0001095	K15-FB		https://www.gem.wiki/K15-FB_Oil_and_Gas_Field_(Netherlands)	cumulative production	gas				2023	5382.32	million m³
OG0001100	K15-FG		https://www.gem.wiki/K15-FG_Oil_and_Gas_Field_(Netherlands)	cumulative production	condensate				2023	0.0099511	million bbl
OG0001100	K15-FG		https://www.gem.wiki/K15-FG_Oil_and_Gas_Field_(Netherlands)	cumulative production	gas				2023	2980.06	million m³
OG0001102	K15-FI		https://www.gem.wiki/K15-FI_Oil_and_Gas_Field_(Netherlands)	cumulative production	condensate				2023	0.000240581	million bbl
OG0001102	K15-FI		https://www.gem.wiki/K15-FI_Oil_and_Gas_Field_(Netherlands)	cumulative production	gas				2023	550.189	million m³
OG0001104	K15-FK		https://www.gem.wiki/K15-FK_Oil_and_Gas_Field_(Netherlands)	cumulative production	condensate				2023	0.00105901	million bbl
OG0001104	K15-FK		https://www.gem.wiki/K15-FK_Oil_and_Gas_Field_(Netherlands)	cumulative production	gas				2023	5210.52	million m³
OG0001112	K17-FA		https://www.gem.wiki/K17-FA_Gas_Field_(Netherlands)	cumulative production	gas				2023	2439.23	million m³
OG0001116	K18-Golf		https://www.gem.wiki/K18-Golf_Gas_Field_(Netherlands)	cumulative production	gas				2023	4840.48	million m³
OG0001128	L02-FA		https://www.gem.wiki/L02-FA_Gas_Field_(Netherlands)	cumulative production	gas				2023	7604.99	million m³
OG0001129	L02-FB		https://www.gem.wiki/L02-FB_Gas_Field_(Netherlands)	cumulative production	gas				2023	6390.01	million m³
OG0001131	L04-A		https://www.gem.wiki/L04-A_Oil_and_Gas_Field_(Netherlands)	cumulative production	condensate				2023	0.00497243	million bbl
OG0001131	L04-A		https://www.gem.wiki/L04-A_Oil_and_Gas_Field_(Netherlands)	cumulative production	gas				2023	22924.2	million m³
OG0001135	L04-G		https://www.gem.wiki/L04-G_Oil_and_Gas_Field_(Netherlands)	cumulative production	condensate				2023	2.69153e-05	million bbl
OG0001135	L04-G		https://www.gem.wiki/L04-G_Oil_and_Gas_Field_(Netherlands)	cumulative production	gas				2023	3012.32	million m³
OG0001137	L05-B		https://www.gem.wiki/L05-B_Gas_Field_(Netherlands)	cumulative production	gas				2023	2031.29	million m³
OG0001138	L05-C		https://www.gem.wiki/L05-C_Gas_Field_(Netherlands)	cumulative production	gas				2023	5907.62	million m³
OG0001139	L05a-A		https://www.gem.wiki/L05a-A_Oil_and_Gas_Field_(Netherlands)	cumulative production	condensate				2023	0.0478811	million bbl
OG0001139	L05a-A		https://www.gem.wiki/L05a-A_Oil_and_Gas_Field_(Netherlands)	cumulative production	gas				2023	31768	million m³
OG0001140	L05a-D		https://www.gem.wiki/L05a-D_Gas_Field_(Netherlands)	cumulative production	gas				2023	839.138	million m³
OG0001143	L06-B		https://www.gem.wiki/L06-B_Gas_Field_(Netherlands)	cumulative production	gas				2023	1682.2	million m³
OG0001156	L08-D		https://www.gem.wiki/L08-D_Oil_and_Gas_Field_(Netherlands)	cumulative production	condensate				2023	0.000731767	million bbl
OG0001156	L08-D		https://www.gem.wiki/L08-D_Oil_and_Gas_Field_(Netherlands)	cumulative production	gas				2023	689.368	million m³
OG0001160	L08-P		https://www.gem.wiki/L08-P_Gas_Field_(Netherlands)	cumulative production	gas				2023	8361.26	million m³
OG0001164	L09-FD		https://www.gem.wiki/L09-FD_Oil_and_Gas_Field_(Netherlands)	cumulative production	condensate				2023	0.0168148	million bbl
OG0001164	L09-FD		https://www.gem.wiki/L09-FD_Oil_and_Gas_Field_(Netherlands)	cumulative production	gas				2023	18234.9	million m³
OG0001166	L09-FF		https://www.gem.wiki/L09-FF_Oil_and_Gas_Field_(Netherlands)	cumulative production	condensate				2023	0.0195202	million bbl
OG0001166	L09-FF		https://www.gem.wiki/L09-FF_Oil_and_Gas_Field_(Netherlands)	cumulative production	gas				2023	9092.04	million m³
OG0001178	L10-CDA		https://www.gem.wiki/L10-CDA_Oil_and_Gas_Field_(Netherlands)	cumulative production	condensate				2023	0.005429	million bbl
OG0001178	L10-CDA		https://www.gem.wiki/L10-CDA_Oil_and_Gas_Field_(Netherlands)	cumulative production	gas				2023	11843.4	million m³
OG0001181	L10-M		https://www.gem.wiki/L10-M_Oil_and_Gas_Field_(Netherlands)	cumulative production	condensate				2023	0.0401538	million bbl
OG0001181	L10-M		https://www.gem.wiki/L10-M_Oil_and_Gas_Field_(Netherlands)	cumulative production	gas				2023	25313.5	million m³
OG0001182	L10-N		https://www.gem.wiki/L10-N_Oil_and_Gas_Field_(Netherlands)	cumulative production	condensate				2023	0.00192541	million bbl
OG0001182	L10-N		https://www.gem.wiki/L10-N_Oil_and_Gas_Field_(Netherlands)	cumulative production	gas				2023	3231.43	million m³
OG0001199	L12a-B		https://www.gem.wiki/L12a-B_Oil_and_Gas_Field_(Netherlands)	cumulative production	condensate				2023	0.00138428	million bbl
OG0001199	L12a-B		https://www.gem.wiki/L12a-B_Oil_and_Gas_Field_(Netherlands)	cumulative production	gas				2023	1357.52	million m³
OG0001200	L12b-C		https://www.gem.wiki/L12b-C_Oil_and_Gas_Field_(Netherlands)	cumulative production	condensate				2023	0.00158087	million bbl
OG0001200	L12b-C		https://www.gem.wiki/L12b-C_Oil_and_Gas_Field_(Netherlands)	cumulative production	gas				2023	1546.27	million m³
OG0001214	L15b-A		https://www.gem.wiki/L15b-A_Oil_and_Gas_Field_(Netherlands)	cumulative production	condensate				2023	0.00616004	million bbl
OG0001214	L15b-A		https://www.gem.wiki/L15b-A_Oil_and_Gas_Field_(Netherlands)	cumulative production	gas				2023	6041.48	million m³
OG0001257	N07-FA		https://www.gem.wiki/N07-FA_Oil_and_Gas_Field_(Netherlands)	cumulative production	condensate				2023	3.49073e-05	million bbl
OG0001257	N07-FA		https://www.gem.wiki/N07-FA_Oil_and_Gas_Field_(Netherlands)	cumulative production	gas				2023	1250.22	million m³
OG0001301	P11b-De Ruyter		https://www.gem.wiki/P11b-De_Ruyter_Oil_and_Gas_Field_(Netherlands)	cumulative production	gas				2023	708.08	million m³
OG0001301	P11b-De Ruyter		https://www.gem.wiki/P11b-De_Ruyter_Oil_and_Gas_Field_(Netherlands)	cumulative production	oil				2023	29.9732	million bbl
OG0001322	P18-2		https://www.gem.wiki/P18-2_Oil_and_Gas_Field_(Netherlands)	cumulative production	condensate				2023	0.100262	million bbl
OG0001322	P18-2		https://www.gem.wiki/P18-2_Oil_and_Gas_Field_(Netherlands)	cumulative production	gas				2023	7212.41	million m³
OG0001332	Q01-B		https://www.gem.wiki/Q01-B_Oil_and_Gas_Field_(Netherlands)	cumulative production	condensate				2023	0.0191068	million bbl
OG0001332	Q01-B		https://www.gem.wiki/Q01-B_Oil_and_Gas_Field_(Netherlands)	cumulative production	gas				2023	13839.2	million m³
OG0001344	Q10-A		https://www.gem.wiki/Q10-A_Oil_and_Gas_Field_(Netherlands)	cumulative production	condensate				2023	0.00213515	million bbl
OG0001344	Q10-A		https://www.gem.wiki/Q10-A_Oil_and_Gas_Field_(Netherlands)	cumulative production	gas				2023	2838.76	million m³
OG0001351	Q16-FA		https://www.gem.wiki/Q16-FA_Oil_and_Gas_Field_(Netherlands)	cumulative production	condensate				2023	0.065325	million bbl
OG0001351	Q16-FA		https://www.gem.wiki/Q16-FA_Oil_and_Gas_Field_(Netherlands)	cumulative production	gas				2023	6058.92	million m³
OG0001437	B 3		https://www.gem.wiki/B_3_Oil_and_Gas_Field_(Poland)	cumulative production	gas				2023	287.468	million m³
OG0001437	B 3		https://www.gem.wiki/B_3_Oil_and_Gas_Field_(Poland)	cumulative production	oil and condensate				2023	18.1836	million bbl
OG0001552	Lubiatów		https://www.gem.wiki/Lubiatów_Oil_and_Gas_Field_(Poland)	cumulative production	gas				2023	2717.13	million m³
OG0001552	Lubiatów		https://www.gem.wiki/Lubiatów_Oil_and_Gas_Field_(Poland)	cumulative production	oil and condensate				2023	23.1018	million bbl
OG0001583	Paproć W		https://www.gem.wiki/Paproć_W_Gas_Field_(Poland)	cumulative production	gas				2023	1695.3	million m³
OG0001600	Radoszyn		https://www.gem.wiki/Radoszyn_Oil_and_Gas_Field_(Poland)	cumulative production	gas				2023	34.7475	million m³
OG0001600	Radoszyn		https://www.gem.wiki/Radoszyn_Oil_and_Gas_Field_(Poland)	cumulative production	oil and condensate				2023	1.22086	million bbl
OG0001651	Wilków		https://www.gem.wiki/Wilków_Gas_Field_(Poland)	cumulative production	gas				2023	2299.31	million m³
OG0001670	Zielin		https://www.gem.wiki/Zielin_Oil_and_Gas_Field_(Poland)	cumulative production	gas				2023	643.814	million m³
OG0001670	Zielin		https://www.gem.wiki/Zielin_Oil_and_Gas_Field_(Poland)	cumulative production	oil and condensate				2023	0.735978	million bbl
OG0001685	Żuchlów		https://www.gem.wiki/Żuchlów_Gas_Field_(Poland)	cumulative production	gas				2023	9231.28	million m³
OG0001725	Caragele		https://www.gem.wiki/Caragele_Gas_Field_(Romania)	cumulative production	gas				2023	1854.71	million m³
OG0001753	Filitelnic (Philitelnic)		https://www.gem.wiki/Filitelnic_(Philitelnic)_Gas_Field_(Romania)	cumulative production	gas				2023	28989.4	million m³
OG0001844	Totea Deep		https://www.gem.wiki/Totea_Deep_Gas_Field_(Romania)	cumulative production	gas				2023	13911.7	million m³
OG0001913	Breagh		https://www.gem.wiki/Breagh_Oil_and_Gas_Field_(United_Kingdom)	cumulative production	gas				2023	11323.4	million m³
OG0001922	Britannia		https://www.gem.wiki/Britannia_Oil_and_Gas_Field_(United_Kingdom)	cumulative production	gas				2023	100486	million m³
OG0001922	Britannia		https://www.gem.wiki/Britannia_Oil_and_Gas_Field_(United_Kingdom)	cumulative production	oil				2023	49.1505	million bbl
OG0001955	Clipper South		https://www.gem.wiki/Clipper_South_Oil_and_Gas_Field_(United_Kingdom)	cumulative production	gas				2023	7930.6	million m³
OG0001955	Clipper South		https://www.gem.wiki/Clipper_South_Oil_and_Gas_Field_(United_Kingdom)	cumulative production	oil				2023	0.693533	million bbl
OG0001973	Cygnus		https://www.gem.wiki/Cygnus_Oil_and_Gas_Field_(United_Kingdom)	cumulative production	gas				2023	15986.8	million m³
OG0001973	Cygnus		https://www.gem.wiki/Cygnus_Oil_and_Gas_Field_(United_Kingdom)	cumulative production	oil				2023	0.998712	million bbl
OG0002006	Everest		https://www.gem.wiki/Everest_Oil_and_Gas_Field_(United_Kingdom)	cumulative production	gas				2023	37886.7	million m³
OG0002006	Everest		https://www.gem.wiki/Everest_Oil_and_Gas_Field_(United_Kingdom)	cumulative production	oil				2023	51.1146	million bbl
OG0002103	Leman South		https://www.gem.wiki/Leman_South_Oil_and_Gas_Field_(United_Kingdom)	cumulative production	gas				2023	1904.58	million m³
OG0002103	Leman South		https://www.gem.wiki/Leman_South_Oil_and_Gas_Field_(United_Kingdom)	cumulative production	oil				2023	0.0650715	million bbl
OG0002154	North Morecambe		https://www.gem.wiki/North_Morecambe_Oil_and_Gas_Field_(United_Kingdom)	cumulative production	gas				2023	38859.2	million m³
OG0002154	North Morecambe		https://www.gem.wiki/North_Morecambe_Oil_and_Gas_Field_(United_Kingdom)	cumulative production	oil				2023	0	million bbl
OG0002177	Rhyl		https://www.gem.wiki/Rhyl_Oil_and_Gas_Field_(United_Kingdom)	cumulative production	gas				2023	2823.38	million m³
OG0002177	Rhyl		https://www.gem.wiki/Rhyl_Oil_and_Gas_Field_(United_Kingdom)	cumulative production	oil				2023	0	million bbl
OG0002181	Rough		https://www.gem.wiki/Rough_Oil_and_Gas_Field_(United_Kingdom)	cumulative production	gas				2023	31595.9	million m³
OG0002181	Rough		https://www.gem.wiki/Rough_Oil_and_Gas_Field_(United_Kingdom)	cumulative production	oil				2023	2.76641	million bbl
OG0002205	South Morecambe		https://www.gem.wiki/South_Morecambe_Oil_and_Gas_Field_(United_Kingdom)	cumulative production	gas				2023	237877	million m³
OG0002205	South Morecambe		https://www.gem.wiki/South_Morecambe_Oil_and_Gas_Field_(United_Kingdom)	cumulative production	oil				2023	22.0456	million bbl
OG0002253	Wytch Farm		https://www.gem.wiki/Wytch_Farm_Oil_and_Gas_Field_(United_Kingdom)	cumulative production	gas				2023	4575	million m³
OG0002253	Wytch Farm		https://www.gem.wiki/Wytch_Farm_Oil_and_Gas_Field_(United_Kingdom)	cumulative production	oil				2023	769.261	million bbl

## Sheet: about
Cumulative production data extracted from https://www.offshore-technology.com/marketdata/
for each oil or gas field, e.g., https://www.offshore-technology.com/marketdata/oil-gas-field-profile-a12-fa-conventional-gas-field-netherlands/?cf-view
