# Supplementary material for: Digesting fossil infrastructure for cleaner energy transitions
Source: Research Square preprint supplement (doi:10.21203/rs.3.rs-6346491/v1), 2025-06-06
Supplement: Supplementary file 9 [file SM_fig_7_efficiencies.pdf › code/Figures/SM_figures/SM_fig_7_efficiencies.pdf]

Carbon dioxide, fossil

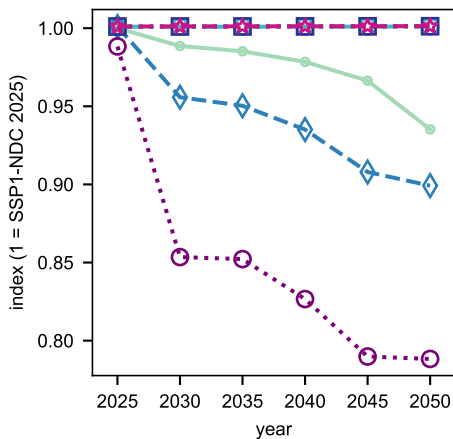

Carbon dioxide, non-fossil

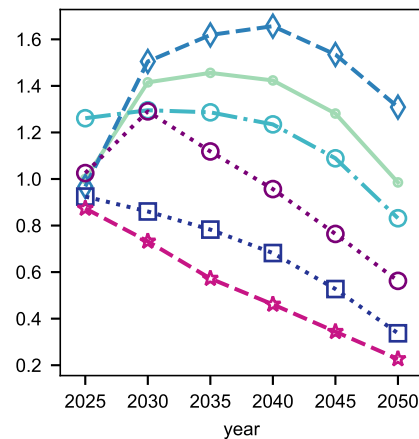

Carbon capture and storage

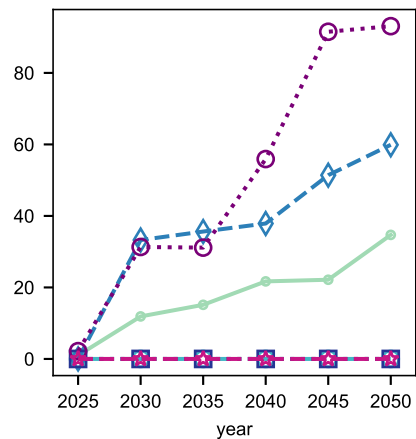

Energy intensity

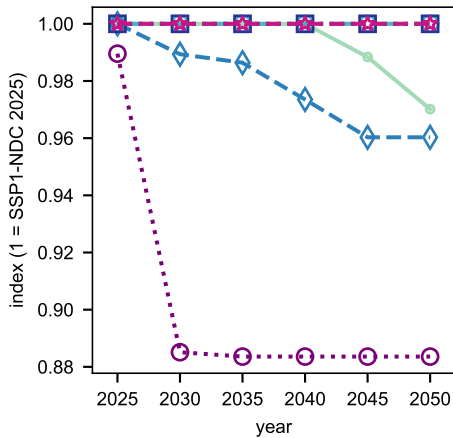

Ferromanganese

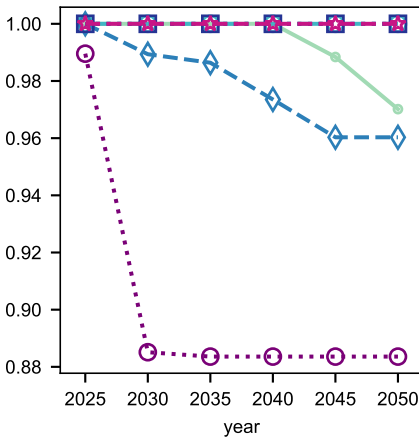

- SSP1-NDC
- SSP1-NP1
- SSP2-NDC
- SSP2-NP1
- SSP5-NDC
- SSP5-NP1
