# Supplementary material for: Digesting fossil infrastructure for cleaner energy transitions
Source: Research Square preprint supplement (doi:10.21203/rs.3.rs-6346491/v1), 2025-06-06

### Climate change

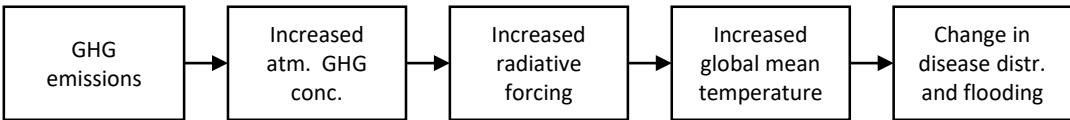

### Particulate matter formation

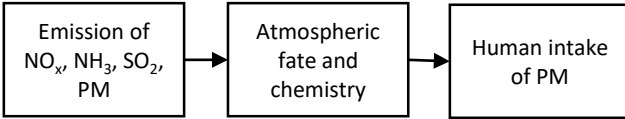

### Photochemical oxidant formation

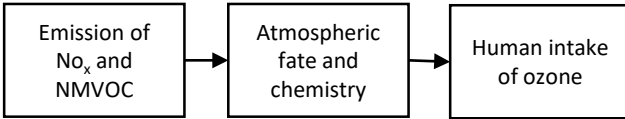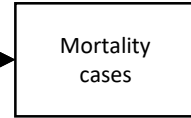

### Human toxicity

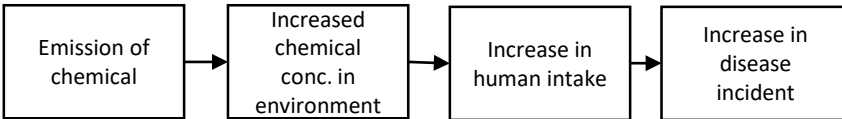

### Water use

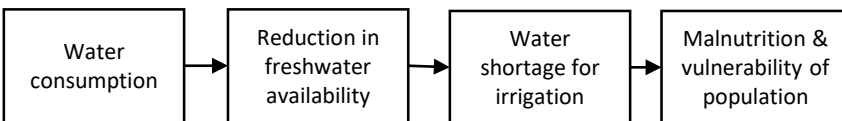

### Ionizing radiation

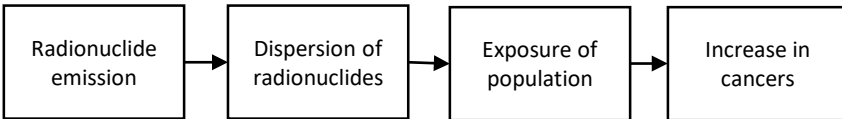

### Ozone depletion

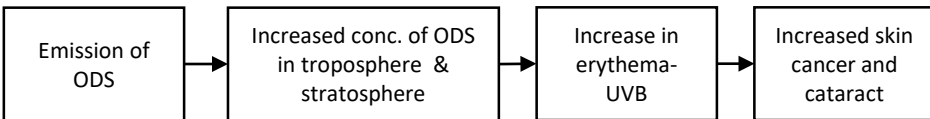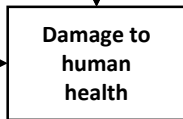

Supplement: Supplementary file 10 [file SM_fig_8_cause-and-effect-chains-human-health.pdf › code/Figures/SM_figures/SM_fig_8_cause-and-effect-chains-human-health.pdf]
