# Supplementary material for: Digesting fossil infrastructure for cleaner energy transitions
Source: Research Square preprint supplement (doi:10.21203/rs.3.rs-6346491/v1), 2025-06-06

## Climate change

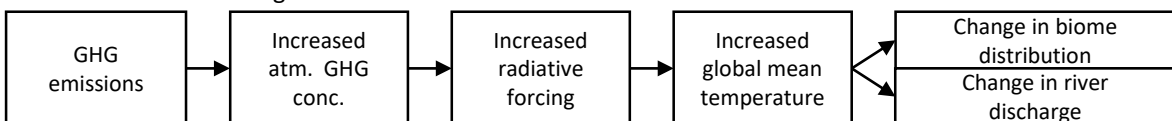

## Photochemical oxidant formation

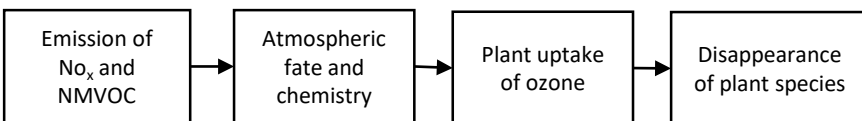

## Terrestrial acidification

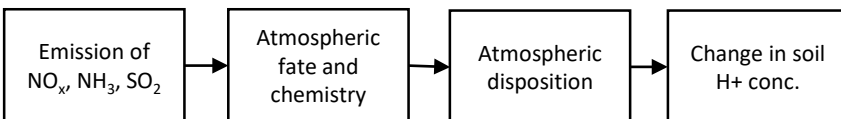

## Ecotoxicity

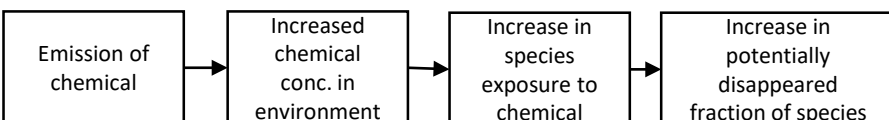

## Land use

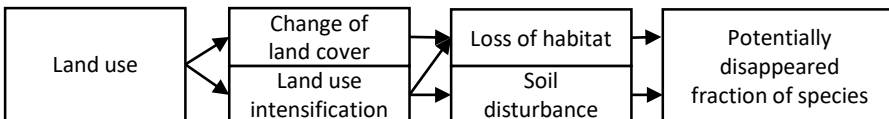

## Water use

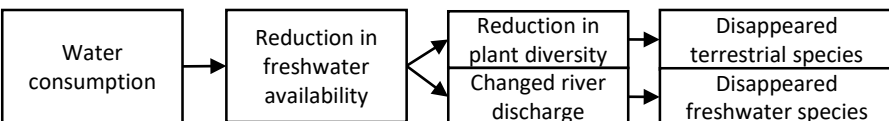

## Freshwater eutrophication

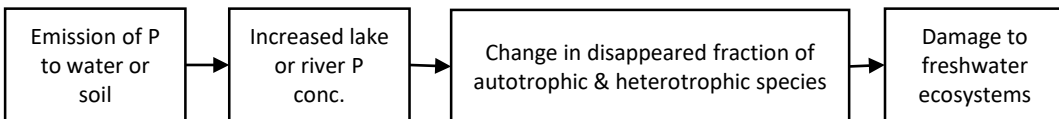

## Marine eutrophication

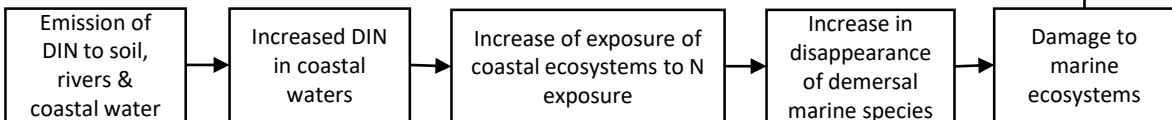

Supplement: Supplementary file 11 [file SM_fig_9_cause-and-effect-chains-ecosystem-damage.pdf › code/Figures/SM_figures/SM_fig_9_cause-and-effect-chains-ecosystem-damage.pdf]
