# Supplementary material for: Digesting fossil infrastructure for cleaner energy transitions
Source: Research Square preprint supplement (doi:10.21203/rs.3.rs-6346491/v1), 2025-06-06
Supplement: Supplementary file 13 [file agg_material_production.xlsx]

## Sheet: Sheet1
Material	Total Production [Mt]	Year	Source	Remark	Citation
Concrete	3000	2017	Towards sustainable concrete | Nature Materials		Monteiro_2017
Sand	50000	2022	2022sandandsustainabilityreportfinal.pdf (unepgrid.ch)		Vander_2022
Steel	1900	2023	Mineral Commodity Summaries 2024 (usgs.gov)		USGS_2024a
Wood	1065.6	2023	Forestry Facts & Figures 2023 (forestresearch.gov.uk)	page 24	FAO_2024
Act. bentonite	18	2021	Mineral Commodity Summaries 2022 - Clays (usgs.gov)	mine production	USGS_2022a
Barite	8.5	2023	Mineral Commodity Summaries 2024 (usgs.gov)	mine production	USGS_2024b
PE	105.279	2022	Plastics – the fast Facts 2023 - Plastics Europe DE	page 2	PlasticsEurope_2023
Cu	27	2023	Mineral Commodity Summaries 2024 (usgs.gov)	refinery production	USGS_2024c
Stone wool	10	2021	Insulation material market volume globally by material | Statista	forecast from 2016	Statista_2016
Al	68	2021	Mineral Commodity Summaries 2022 - Aluminum (usgs.gov)	smelter production	USGS_2022b
Pitch			Main Sources of Tar Production & Exporting Countries - Farazoil
Rubber	29.7	2022	Global natural & synthetic rubber consumption 1990-H1 2023 | Statista		Statista_2024
Fe	1300	2023	Mineral Commodity Summaries 2024 (usgs.gov)		USGS_2024a
Lignite	638.5	2020	Production – Coal Information: Overview – Analysis - IEA		IEA_2021
Zn	12	2023	Mineral Commodity Summaries 2024 (usgs.gov)	mine production	USGS_2024d
Ni	3.6	2023	Mineral Commodity Summaries 2024 (usgs.gov)	mine production	USGS_2024e
Epoxy resin	3.6	2022	Epoxy Resin Market Size, Growth & Forecast, 2030 (chemanalyst.com)		ChemAnalyst_2024
Ceramic
PVC	50.8381	2022	Plastics – the fast Facts 2023 - Plastics Europe DE	page 2	PlasticsEurope_2023
Cr	41	2021	Mineral Commodity Summaries 2022 - Chromium (usgs.gov)		USGS_2022f
Co	0.1969	2023	Home | Statistical Review of World Energy		EnergyInstitute_2024
Si	3.8	2023	Mineral Commodity Summaries 2024 (usgs.gov)		USGS_2024g

## Sheet: imports
Material	import/consumption
Concrete	-
Sand
Steel
Wood
Act. bentonite
Barite
PE
Cu
Stone wool
Al
Pitch
Rubber
Fe
Lignite
Zn
Ni
Epoxy resin
Ceramic
PVC
Cr
Co
Si
