# Supplementary material for: Digesting fossil infrastructure for cleaner energy transitions
Source: Research Square preprint supplement (doi:10.21203/rs.3.rs-6346491/v1), 2025-06-06
Supplement: Supplementary file 14 [file figure3_SSP2-NPi_optimistic_idle.pdf › code/Figures/figure3_SSP2-NPi_optimistic_idle.pdf]

**a**

North America

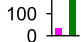

Europe

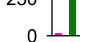

Steel in fossil infrastructure [Mt]

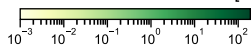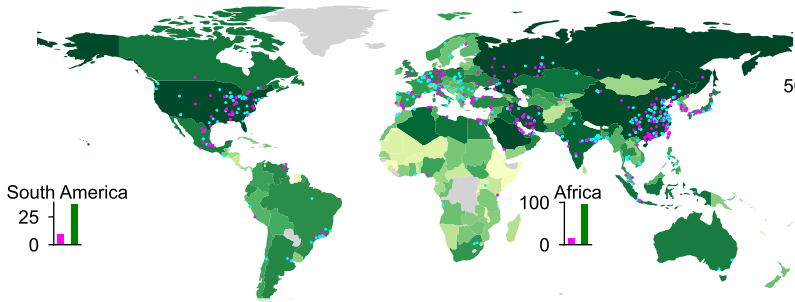

South America

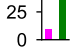

Africa

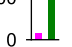

Asia

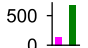

Oceania

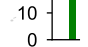

Recycling plant with capacity

● <1 Mt/a    ● 1-9 Mt/a    ● >9 Mt/a

■ Idle Capacity [Mt/a]■ Stock [Mt]**b**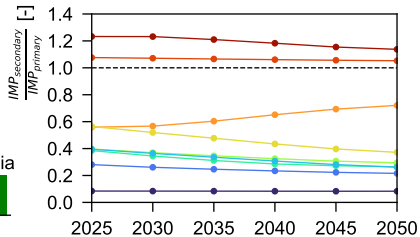

- Ionising radiation
- Water depletion
- Land use
- Ozone depletion
- Biodiversity loss
- Marine eutrophication
- Global warming potential 100a
- Particulate matter
- Metal depletion
