# Supplementary material for: Digesting fossil infrastructure for cleaner energy transitions
Source: Research Square preprint supplement (doi:10.21203/rs.3.rs-6346491/v1), 2025-06-06
Supplement: Supplementary file 16 [file figure5_SSP2-NPi_optimistic.pdf › code/Figures/figure5_SSP2-NPi_optimistic.pdf]

**a**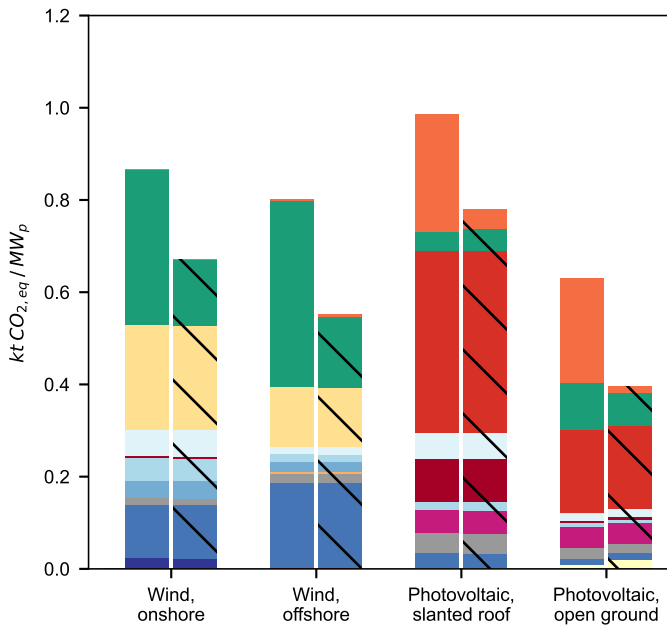

Electronics  
Cell

Aluminium  
Lead

Concrete  
Transport

**b**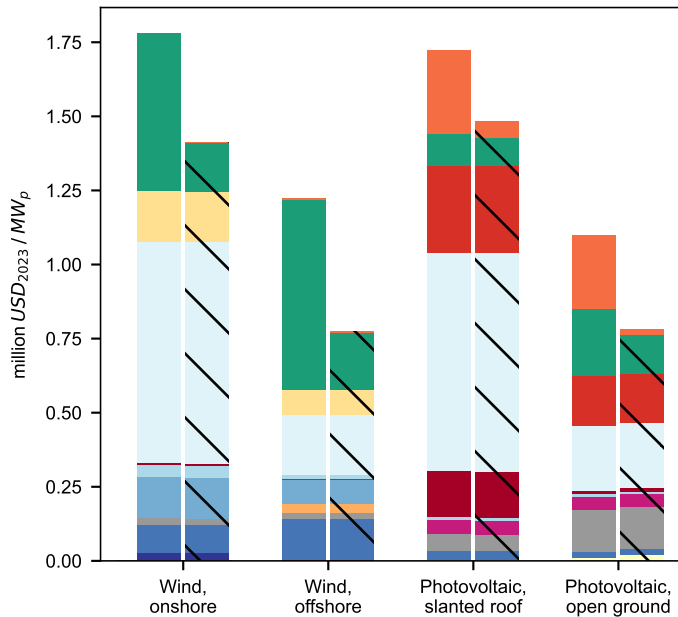

Copper  
Electricity

Iron  
Plastic

Road  
Other

Steel  
Glass
