# Supplementary material for: Digesting fossil infrastructure for cleaner energy transitions
Source: Research Square preprint supplement (doi:10.21203/rs.3.rs-6346491/v1), 2025-06-06
Supplement: Supplementary file 17 [file ar6_capacity_projections.xlsx]

## Sheet: data
Model	Scenario	Region	Variable	Unit	2005	2010	2015	2020	2025	2030	2035	2040	2045	2050	2055	2060	2070	2080	2090	2100
REMIND 2.1	R2p1_SSP2-NDC	World	Capacity|Electricity|Solar|PV	GW	2.6811	49.3803	215.747	650.339	1956.23	4334.82	7175.73	10090.8	12986.8	15929.2	18988.2	22243.3	28869.1	36278.4	42427.6	48822.4
REMIND 2.1	R2p1_SSP2-NDC	World	Capacity|Electricity|Wind	GW	32.1484	164.968	417.635	702.172	1216.78	2101.66	3354.91	4959.9	6972.22	9424.82	12047.8	14520.5	18917.9	21710.5	24120.8	26228.9
REMIND 2.1	R2p1_SSP1-NDC	World	Capacity|Electricity|Solar|PV	GW	2.6811	49.3803	215.747	650.339	1886.31	4233.84	7090.61	9862.11	12279.5	14346.1	16116.6	17614.8	19982.4	21569.7	21047.3	20670.3
REMIND 2.1	R2p1_SSP1-NDC	World	Capacity|Electricity|Wind	GW	32.1484	164.968	417.635	702.172	1148.16	1854.71	2836.32	4103.86	5676.07	7454.17	9160.15	10585.5	12682.8	13221.4	13081.2	12891.4
REMIND 2.1	R2p1_SSP5-NPi	World	Capacity|Electricity|Solar|PV	GW	2.6811	49.3803	215.747	650.339	1395.05	2241.23	2961.86	3563.32	4178.56	4880.78	5781.53	7049.94	10771.7	15989.7	20218	24918
REMIND 2.1	R2p1_SSP5-NPi	World	Capacity|Electricity|Wind	GW	32.1484	164.968	417.635	702.172	1038.33	1408.51	1745.24	2083.01	2649.47	3497.65	4638.74	6008.67	9794.49	14170.2	19065.1	23164.5
REMIND 2.1	R2p1_SSP5-NDC	World	Capacity|Electricity|Solar|PV	GW	2.6811	49.3803	215.747	650.339	1675.67	3150.12	4675.47	6189.55	7762.09	9505.62	11553.6	14009.9	19993.3	27472.4	32949.5	37460.1
REMIND 2.1	R2p1_SSP5-NDC	World	Capacity|Electricity|Wind	GW	32.1484	164.968	417.635	702.172	1191.15	1938.81	2886.04	4095	5718.62	7879.72	10474.5	13377.3	20020.9	25405.1	29333.3	32202.4
REMIND 2.1	R2p1_SSP1-NPi	World	Capacity|Electricity|Solar|PV	GW	2.6811	49.3803	215.747	650.339	1554.27	3082.02	4876.68	6608.59	8253.86	9762.74	11111.5	12380	14794.7	16984.1	17431.6	17323.3
REMIND 2.1	R2p1_SSP1-NPi	World	Capacity|Electricity|Wind	GW	32.1484	164.968	417.635	702.172	1053.44	1486.7	1963.8	2498.03	3265.47	4298.79	5474.6	6615.28	8805.13	9866.77	10086	10029.2
REMIND 2.1	R2p1_SSP2-NPi	World	Capacity|Electricity|Solar|PV	GW	2.6811	49.3803	215.747	650.339	1559.93	2971.81	4541.78	6108.06	7795.3	9645.27	11724.7	14148.2	19835.3	26999.2	34388.2	41607.3
REMIND 2.1	R2p1_SSP2-NPi	World	Capacity|Electricity|Wind	GW	32.1484	164.968	417.635	702.172	1078.15	1562.22	2109.47	2760.14	3734.54	5097.01	6766.34	8628.7	12996.1	16884.2	20047.5	22657.8

## Sheet: README
© AR6 Scenario Explorer and Database hosted by IIASA https://data.ece.iiasa.ac.at/ar6
AR6 Scenario Explorer and Database hosted by IIASA. Please see licensing information at https://data.ece.iiasa.ac.at/ar6/#/license. Citation at: https://doi.org/10.5281/zenodo.5886912
