# Supplementary material for: Digesting fossil infrastructure for cleaner energy transitions
Source: Research Square preprint supplement (doi:10.21203/rs.3.rs-6346491/v1), 2025-06-06
Supplement: Supplementary file 21 [file geography_translation.xlsx]

## Sheet: country_dict
	country name
Bolivia, Plurinational State of	Bolivia
Bosnia and Herzegovina	Bosnia and Herz.
Brunei Darussalam	Brunei
Central African Republic	Central African Rep.
China-Japan	China
Czech Republic	Czechia
Dominican Republic	Dominican Rep.
Equatorial Guinea	Eq. Guinea
Eswatini	eSwatini
French Guiana	France
Hong Kong	China
Iran, Islamic Republic of	Iran
Iran-Iraq	Iran
Isle of Man	United Kingdom
Korea, Republic of	South Korea
Kuwait-Saudi Arabia	Kuwait
Moldova, Republic of	Moldova
Palestine, State of	Palestine
Republic of the Congo	Congo
Russian Federation	Russia
Réunion	France
Saudi Arabia-Bahrain	Saudi Arabia
Saudi Arabia-Iran	Saudi Arabia
South Sudan	S. Sudan
Syrian Arab Republic	Syria
Taiwan, Province of China	Taiwan
Tanzania, United Republic of	Tanzania
Türkiye	Turkey
United Arab Emirates-Iran	United Arab Emirates
United States	United States of America
Venezuela, Bolivarian Republic of	Venezuela
Viet Nam	Vietnam
Vietnam-Malaysia	Vietnam
Western Sahara	W. Sahara

## Sheet: continent_dict
	continent
Antigua and Barbuda	North America
Aruba	South America
Bahrain	Asia
Barbados	North America
Bermuda	Europe
Bolivia, Plurinational State of	South America
Bosnia and Herzegovina	Europe
Brunei Darussalam	Asia
Cayman Islands	Europe
Central African Republic	Africa
China-Japan	Asia
Czech Republic	Europe
Dominican Republic	North America
Guadeloupe	Europe
Liechtenstein	Europe
Macao	Asia
Maldives	Asia
Malta	Europe
Martinique	Europe
Mauritius	Africa
San Marino	Europe
Seychelles	Europe
Singapore	Asia
Åland Islands	Europe
