# Supplementary material for: Digesting fossil infrastructure for cleaner energy transitions
Source: Research Square preprint supplement (doi:10.21203/rs.3.rs-6346491/v1), 2025-06-06
Supplement: Supplementary file 25 [file mitigation_pathways.xlsx]

## Sheet: data
Model	Scenario	Region	Variable	Unit	2000	2001	2002	2003	2004	2005	2006	2007	2008	2009	2010	2011	2012	2013	2014	2015	2016	2017	2018	2019	2020	2021	2022	2023	2024	2025	2026	2027	2028	2029	2030	2031	2032	2033	2034	2035	2036	2037	2038	2039	2040	2041	2042	2043	2044
REMIND 2.1	R2p1_SSP2-NDC	World	Emissions|CO2	Mt CO2/yr						33702.1					37208.8					38909.6					39302.5					40030.5					39940.1					37226.3					32719.1
REMIND 2.1	R2p1_SSP2-NDC	World	AR6 climate diagnostics|Surface Temperature (GSAT)|FaIRv1.6.2|50.0th Percentile	K	0.762377	0.811932	0.848844	0.872781	0.889803	0.903675	0.911695	0.922493	0.938587	0.958394	0.980158	1.00403	1.02854	1.05694	1.08423	1.11195	1.14026	1.16897	1.19727	1.22195	1.24635	1.27086	1.3003	1.32856	1.35721	1.3813	1.40321	1.42003	1.43298	1.44683	1.45979	1.47423	1.49134	1.50945	1.53292	1.55934	1.58431	1.60742	1.62949	1.64865	1.6659	1.68049	1.69416	1.70805	1.72269
REMIND 2.1	R2p1_SSP1-NDC	World	Emissions|CO2	Mt CO2/yr						33702.1					37208.8					38909.6					39302.5					37685.1					36504.1					33905.5					29159.3
REMIND 2.1	R2p1_SSP1-NDC	World	AR6 climate diagnostics|Surface Temperature (GSAT)|FaIRv1.6.2|50.0th Percentile	K	0.762377	0.811932	0.848844	0.872781	0.889803	0.903675	0.911695	0.922493	0.938587	0.958394	0.980158	1.00403	1.02854	1.05694	1.08423	1.11195	1.14026	1.16897	1.19725	1.22191	1.24626	1.271	1.30096	1.33131	1.35889	1.38464	1.40319	1.41652	1.42936	1.44237	1.45452	1.46758	1.48252	1.49918	1.51906	1.54052	1.56244	1.58285	1.60097	1.61817	1.63355	1.64502	1.65437	1.66526	1.67873
REMIND 2.1	R2p1_SSP5-NPi	World	Emissions|CO2	Mt CO2/yr						33702.1					37208.8					38909.6					39302.5					42922.4					50296.2					57956					63659.4
REMIND 2.1	R2p1_SSP5-NPi	World	AR6 climate diagnostics|Surface Temperature (GSAT)|FaIRv1.6.2|50.0th Percentile	K	0.762377	0.811932	0.848844	0.872781	0.889803	0.903675	0.911695	0.922493	0.938587	0.958394	0.980158	1.00403	1.02854	1.05694	1.08423	1.11195	1.14024	1.16889	1.19701	1.22142	1.24548	1.26986	1.29812	1.32678	1.35387	1.37866	1.39773	1.41215	1.42475	1.4388	1.45363	1.47088	1.48801	1.51122	1.53876	1.56852	1.59971	1.63104	1.6631	1.69364	1.7238	1.75179	1.78144	1.81166	1.84407
REMIND 2.1	R2p1_SSP5-NDC	World	Emissions|CO2	Mt CO2/yr						33702.1					37208.8					38909.6					39302.5					40899.4					45912.7					49722.8					49877.2
REMIND 2.1	R2p1_SSP5-NDC	World	AR6 climate diagnostics|Surface Temperature (GSAT)|FaIRv1.6.2|50.0th Percentile	K	0.762377	0.811932	0.848844	0.872781	0.889803	0.903675	0.911695	0.922493	0.938587	0.958394	0.980158	1.00403	1.02854	1.05694	1.08423	1.11195	1.14027	1.16911	1.19774	1.22243	1.24786	1.27247	1.30313	1.33332	1.36138	1.38867	1.40727	1.4221	1.43688	1.44884	1.46255	1.47797	1.49537	1.51612	1.54354	1.56965	1.59862	1.62846	1.65638	1.68395	1.70868	1.73487	1.75756	1.78263	1.81138
REMIND 2.1	R2p1_SSP1-PkBudg900	World	Emissions|CO2	Mt CO2/yr						33702.1					37208.8					38909.6					39302.5					29616.4					22961.8					16262.7					10561.5
REMIND 2.1	R2p1_SSP1-PkBudg900	World	AR6 climate diagnostics|Surface Temperature (GSAT)|FaIRv1.6.2|50.0th Percentile	K	0.762377	0.811932	0.848844	0.872781	0.889803	0.903675	0.911695	0.922493	0.938587	0.958394	0.980158	1.00403	1.02854	1.05694	1.08423	1.11195	1.14025	1.16893	1.19716	1.22169	1.24586	1.27104	1.30177	1.33236	1.36079	1.38462	1.40081	1.41191	1.41915	1.42564	1.43148	1.43719	1.44322	1.44938	1.46105	1.47238	1.48272	1.49056	1.4938	1.49632	1.49563	1.49238	1.48828	1.4828	1.47976
REMIND 2.1	R2p1_SSP1-NPi	World	Emissions|CO2	Mt CO2/yr						33702.1					37208.8					38909.6					39302.5					38930.6					39356.2					39416.6					37737.1
REMIND 2.1	R2p1_SSP1-NPi	World	AR6 climate diagnostics|Surface Temperature (GSAT)|FaIRv1.6.2|50.0th Percentile	K	0.762377	0.811932	0.848844	0.872781	0.889803	0.903675	0.911695	0.922493	0.938587	0.958394	0.980158	1.00403	1.02854	1.05694	1.08423	1.11195	1.14026	1.16906	1.19756	1.22221	1.24716	1.27199	1.30173	1.33155	1.35865	1.38451	1.4019	1.41607	1.42903	1.44159	1.45435	1.46875	1.48393	1.50319	1.52461	1.54947	1.57396	1.59772	1.62002	1.64129	1.66118	1.67967	1.69376	1.71075	1.73184
REMIND 2.1	R2p1_SSP2-NPi	World	Emissions|CO2	Mt CO2/yr						33702.1					37208.8					38909.6					39302.5					41512.1					43912.2					44973.2					44800.6
REMIND 2.1	R2p1_SSP2-NPi	World	AR6 climate diagnostics|Surface Temperature (GSAT)|FaIRv1.6.2|50.0th Percentile	K	0.762377	0.811932	0.848844	0.872781	0.889803	0.903675	0.911695	0.922493	0.938587	0.958394	0.980158	1.00403	1.02854	1.05694	1.08423	1.11195	1.14026	1.16905	1.19756	1.22208	1.24716	1.27155	1.29993	1.3282	1.35573	1.37931	1.40018	1.4171	1.43049	1.44352	1.45832	1.47506	1.4921	1.51363	1.54016	1.56809	1.59834	1.62677	1.6532	1.67849	1.70209	1.72265	1.74446	1.76674	1.79067
[truncated: 56 more columns]

## Sheet: README
© AR6 Scenario Explorer and Database hosted by IIASA https://data.ece.iiasa.ac.at/ar6
AR6 Scenario Explorer and Database hosted by IIASA. Please see licensing information at https://data.ece.iiasa.ac.at/ar6/#/license. Citation at: https://doi.org/10.5281/zenodo.5886912
