# Supplementary material for: Digesting fossil infrastructure for cleaner energy transitions
Source: Research Square preprint supplement (doi:10.21203/rs.3.rs-6346491/v1), 2025-06-06
Supplement: Supplementary file 29 [file production_costs.xlsx]

## Sheet: Sheet1
Primary production route	reinforcing steel	low-alloyed steel	chromium steel
BF-BOF	808.741	808.812	824.061
EAF	805.975	767.381	772.113
