# Supplementary material for: Digesting fossil infrastructure for cleaner energy transitions
Source: Research Square preprint supplement (doi:10.21203/rs.3.rs-6346491/v1), 2025-06-06
Supplement: Supplementary file 45 [file indicator_aggregation_dict.xlsx]

## Sheet: Sheet1
	agg. ind.
acidification: terrestrial	Acidification (ED)
climate change: freshwater ecosystems	Climate change (ED)
climate change: human health	Climate change (HH)
climate change: terrestrial ecosystems	Climate change (ED)
ecotoxicity: freshwater	Ecotoxicity (ED)
ecotoxicity: marine	Ecotoxicity (ED)
ecotoxicity: terrestrial	Ecotoxicity (ED)
eutrophication: freshwater	Eutrophication (ED)
eutrophication: marine	Eutrophication (ED)
human toxicity: carcinogenic	Human toxicity (HH)
human toxicity: non-carcinogenic	Human toxicity (HH)
ionising radiation	Ionising radiation (HH)
land use	Land use (ED)
ozone depletion	Ozone depletion (HH)
particulate matter formation	Particulate matter formation (HH)
photochemical oxidant formation: human health	Photochemical oxidant formation (HH)
photochemical oxidant formation: terrestrial ecosystems	Photochemical oxidant formation (ED)
water use: aquatic ecosystems	Water use (ED)
water use: human health	Water use (HH)
water use: terrestrial ecosystems	Water use (ED)
energy resources: non-renewable, fossil, inflation adjusted	Natural resources
material resources: metals/minerals, inflation adjusted	Natural resources
Other	Other
climate change	Global warming potential (100a)
freshwater eutrophication	Freshwater eutrophication
marine eutrophication	Marine eutrophication
metal depletion	Metal depletion
resource	Land use
water depletion	Water depletion
global warming potential (GWP100)	Global warming potential (100a)
agricultural land occupation (LOP)	Agricultural land occupation
fossil fuel potential (FFP)	Fossil depletion
freshwater ecotoxicity potential (FETP)	Freshwater ecotoxicity
freshwater eutrophication potential (FEP)	Freshwater eutrophication
human toxicity potential (HTPc)	Human toxicity, carcinogenic
human toxicity potential (HTPnc)	Human toxicity, non-carcinogenic
ionising radiation potential (IRP)	Ionising radiation
marine ecotoxicity potential (METP)	Marine ecotoxicity
marine eutrophication potential (MEP)	Marine eutrophication
ozone depletion potential (ODPinfinite)	Ozon depletion
particulate matter formation potential (PMFP)	Particulate matter formation
photochemical oxidant formation potential: ecosystems (EOFP)	Photochemical oxidant formation, ecosystems
photochemical oxidant formation potential: humans (HOFP)	Photochemical oxidant formation, humans
surplus ore potential (SOP)	Metal depletion
terrestrial acidification potential (TAP)	Terrestrial acidification
terrestrial ecotoxicity potential (TETP)	Terrestrial ecotoxicity
water consumption potential (WCP)	Water depletion
land occupation	Land use
