# Supplementary material for: Digesting fossil infrastructure for cleaner energy transitions
Source: Research Square preprint supplement (doi:10.21203/rs.3.rs-6346491/v1), 2025-06-06
Supplement: Supplementary file 49 [file monetarization_factors.xlsx]

## Sheet: f_m
Impact Indicator	Indicator unit	value	lower bound	upper bound	unit	source
Human Health	DALY	176624	148288	200236	US$ 2018 / DALY	Low-carbon diets can reduce global ecological and health costs | Nature Food
Ecosystem damage	species loss	17891594	4472899	44728985	US$ 2018 / species loss	Low-carbon diets can reduce global ecological and health costs | Nature Food

## Sheet: f_m_calc
Impact Indicator	Indicator unit	value	lower bound	upper bound	unit	source	for 2018		GDP 2018		Global GDP over the long run (ourworldindata.org)					interpolated		9.28e-07	0.220168	220.168		495.852
Human Health	DALY	176624	148288	200236	US$ 2018 / DALY	Low-carbon diets can reduce global ecological and health costs | Nature Food						Inflation Calculator | Find US Dollar's Value From 1913-2024 (usinflationcalculator.com)						2.80008e-09	0.0560482	56.0482
Ecosystem damage	species loss	17891594	4472899	44728985	US$ 2018 / species loss	Low-carbon diets can reduce global ecological and health costs | Nature Food			value												lower bound												upper bound
	GDP per capita US$ 2010								HH [US$ 2018 / DALY]						ED [US$ 2018 / species.yr]						HH [US$ 2018 / DALY]						ED [US$ 2018 / species.yr]						HH [US$ 2018 / DALY]						ED [US$ 2018 / species.yr]
	Remind 2.1 NDC			Remind 2.1 NPi			income elasticity willingness-to-pay		Remind 2.1 NDC			Remind 2.1 NPi			Remind 2.1 NDC			Remind 2.1 NPi			Remind 2.1 NDC			Remind 2.1 NPi			Remind 2.1 NDC			Remind 2.1 NPi			Remind 2.1 NDC			Remind 2.1 NPi			Remind 2.1 NDC			Remind 2.1 NPi
year	SSP1	SSP2	SSP5	SSP1	SSP2	SSP5	eta_e_HH	eta_e_ED	SSP1	SSP2	SSP5	SSP1	SSP2	SSP5	SSP1	SSP2	SSP5	SSP1	SSP2	SSP5	SSP1	SSP2	SSP5	SSP1	SSP2	SSP5	SSP1	SSP2	SSP5	SSP1	SSP2	SSP5	SSP1	SSP2	SSP5	SSP1	SSP2	SSP5	SSP1	SSP2	SSP5	SSP1	SSP2	SSP5
1980	7674.91	7674.91	7674.91	7674.91	7674.91	7674.91	1.1	0.38	103207	109073	91069.1	94100.4	101527	101527	1.48607e+07	1.51473e+07	1.42321e+07	1.4394e+07	1.47767e+07	1.47767e+07	86649.2	91574.1	76458.8	79003.7	85238.7	85238.7	1.48607e+07	1.51473e+07	1.42321e+07	1.4394e+07	1.47767e+07	1.47767e+07	86649.2	91574.1	76458.8	79003.7	85238.7	85238.7	1.48607e+07	1.51473e+07	1.42321e+07	1.4394e+07	1.47767e+07	1.47767e+07
1981	7764.41	7764.41	7764.41	7764.41	7764.41	7764.41	1.1	0.38	104531	110473	92237.9	95308.1	102830	102830	1.49263e+07	1.52141e+07	1.42949e+07	1.44576e+07	1.4842e+07	1.4842e+07	87761.2	92749.3	77440.1	80017.7	86332.6	86332.6	1.49263e+07	1.52141e+07	1.42949e+07	1.44576e+07	1.4842e+07	1.4842e+07	87761.2	92749.3	77440.1	80017.7	86332.6	86332.6	1.49263e+07	1.52141e+07	1.42949e+07	1.44576e+07	1.4842e+07	1.4842e+07
1982	7852.82	7852.82	7852.82	7852.82	7852.82	7852.82	1.1	0.38	105841	111857	93394	96502.6	104119	104119	1.49907e+07	1.52797e+07	1.43566e+07	1.45199e+07	1.4906e+07	1.4906e+07	88861.2	93911.8	78410.7	81020.6	87414.7	87414.7	1.49907e+07	1.52797e+07	1.43566e+07	1.45199e+07	1.4906e+07	1.4906e+07	88861.2	93911.8	78410.7	81020.6	87414.7	87414.7	1.49907e+07	1.52797e+07	1.43566e+07	1.45199e+07	1.4906e+07	1.4906e+07
1983	7943.59	7943.59	7943.59	7943.59	7943.59	7943.59	1.1	0.38	107188	113280	94582.2	97730.3	105443	105443	1.50563e+07	1.53466e+07	1.44194e+07	1.45834e+07	1.49712e+07	1.49712e+07	89991.7	95106.5	79408.2	82051.3	88526.8	88526.8	1.50563e+07	1.53466e+07	1.44194e+07	1.45834e+07	1.49712e+07	1.49712e+07	89991.7	95106.5	79408.2	82051.3	88526.8	88526.8	1.50563e+07	1.53466e+07	1.44194e+07	1.45834e+07	1.49712e+07	1.49712e+07
1984	8037.7	8037.7	8037.7	8037.7	8037.7	8037.7	1.1	0.38	108586	114757	95815.4	99004.6	106818	106818	1.51238e+07	1.54154e+07	1.44841e+07	1.46489e+07	1.50383e+07	1.50383e+07	91165.1	96346.6	80443.6	83121.2	89681.1	89681.1	1.51238e+07	1.54154e+07	1.44841e+07	1.46489e+07	1.50383e+07	1.50383e+07	91165.1	96346.6	80443.6	83121.2	89681.1	89681.1	1.51238e+07	1.54154e+07	1.44841e+07	1.46489e+07	1.50383e+07	1.50383e+07
1985	8132.27	8132.27	8132.27	8132.27	8132.27	8132.27	1.1	0.38	109992	116243	97056.3	100287	108201	108201	1.51912e+07	1.54841e+07	1.45486e+07	1.47141e+07	1.51053e+07	1.51053e+07	92345.7	97594.4	81485.4	84197.7	90842.5	90842.5	1.51912e+07	1.54841e+07	1.45486e+07	1.47141e+07	1.51053e+07	1.51053e+07	92345.7	97594.4	81485.4	84197.7	90842.5	90842.5	1.51912e+07	1.54841e+07	1.45486e+07	1.47141e+07	1.51053e+07	1.51053e+07
1986	8226.65	8226.65	8226.65	8226.65	8226.65	8226.65	1.1	0.38	111397	117728	98296	101568	109583	109583	1.5258e+07	1.55522e+07	1.46126e+07	1.47788e+07	1.51717e+07	1.51717e+07	93525.3	98841	82526.3	85273.2	92002.9	92002.9	1.5258e+07	1.55522e+07	1.46126e+07	1.47788e+07	1.51717e+07	1.51717e+07	93525.3	98841	82526.3	85273.2	92002.9	92002.9	1.5258e+07	1.55522e+07	1.46126e+07	1.47788e+07	1.51717e+07	1.51717e+07
1987	8320.62	8320.62	8320.62	8320.62	8320.62	8320.62	1.1	0.38	112797	119208	99531.8	102845	110961	110961	1.5324e+07	1.56194e+07	1.46758e+07	1.48427e+07	1.52373e+07	1.52373e+07	94701.1	100084	83563.8	86345.2	93159.5	93159.5	1.5324e+07	1.56194e+07	1.46758e+07	1.48427e+07	1.52373e+07	1.52373e+07	94701.1	100084	83563.8	86345.2	93159.5	93159.5	1.5324e+07	1.56194e+07	1.46758e+07	1.48427e+07	1.52373e+07	1.52373e+07
1988	8417.5	8417.5	8417.5	8417.5	8417.5	8417.5	1.1	0.38	114243	120736	100807	104163	112383	112383	1.53915e+07	1.56883e+07	1.47405e+07	1.49081e+07	1.53045e+07	1.53045e+07	95914.7	101366	84634.7	87451.8	94353.4	94353.4	1.53915e+07	1.56883e+07	1.47405e+07	1.49081e+07	1.53045e+07	1.53045e+07	95914.7	101366	84634.7	87451.8	94353.4	94353.4	1.53915e+07	1.56883e+07	1.47405e+07	1.49081e+07	1.53045e+07	1.53045e+07
1989	8517.94	8517.94	8517.94	8517.94	8517.94	8517.94	1.1	0.38	115743	122322	102131	105531	113859	113859	1.54611e+07	1.57592e+07	1.4807e+07	1.49755e+07	1.53737e+07	1.53737e+07	97174.4	102697	85746.2	88600.3	95592.5	95592.5	1.54611e+07	1.57592e+07	1.4807e+07	1.49755e+07	1.53737e+07	1.53737e+07	97174.4	102697	85746.2	88600.3	95592.5	95592.5	1.54611e+07	1.57592e+07	1.4807e+07	1.49755e+07	1.53737e+07	1.53737e+07
1990	8620.76	8620.76	8620.76	8620.76	8620.76	8620.76	1.1	0.38	117281	123947	103488	106933	115372	115372	1.55317e+07	1.58312e+07	1.48747e+07	1.50439e+07	1.54439e+07	1.54439e+07	98465.4	104062	86885.4	89777.4	96862.5	96862.5	1.55317e+07	1.58312e+07	1.48747e+07	1.50439e+07	1.54439e+07	1.54439e+07	98465.4	104062	86885.4	89777.4	96862.5	96862.5	1.55317e+07	1.58312e+07	1.48747e+07	1.50439e+07	1.54439e+07	1.54439e+07
1991	8586.94	8586.94	8586.94	8586.94	8586.94	8586.94	1.1	0.38	116775	123412	103042	106471	114874	114874	1.55085e+07	1.58075e+07	1.48525e+07	1.50215e+07	1.54209e+07	1.54209e+07	98040.6	103613	86510.6	89390.1	96444.7	96444.7	1.55085e+07	1.58075e+07	1.48525e+07	1.50215e+07	1.54209e+07	1.54209e+07	98040.6	103613	86510.6	89390.1	96444.7	96444.7	1.55085e+07	1.58075e+07	1.48525e+07	1.50215e+07	1.54209e+07	1.54209e+07
1992	8585.77	8585.77	8585.77	8585.77	8585.77	8585.77	1.1	0.38	116757	123394	103026	106455	114857	114857	1.55077e+07	1.58067e+07	1.48517e+07	1.50207e+07	1.54201e+07	1.54201e+07	98025.9	103597	86497.6	89376.7	96430.2	96430.2	1.55077e+07	1.58067e+07	1.48517e+07	1.50207e+07	1.54201e+07	1.54201e+07	98025.9	103597	86497.6	89376.7	96430.2	96430.2	1.55077e+07	1.58067e+07	1.48517e+07	1.50207e+07	1.54201e+07	1.54201e+07
1993	8595.96	8595.96	8595.96	8595.96	8595.96	8595.96	1.1	0.38	116910	123555	103161	106594	115007	115007	1.55147e+07	1.58139e+07	1.48584e+07	1.50275e+07	1.5427e+07	1.5427e+07	98153.9	103733	86610.5	89493.4	96556.1	96556.1	1.55147e+07	1.58139e+07	1.48584e+07	1.50275e+07	1.5427e+07	1.5427e+07	98153.9	103733	86610.5	89493.4	96556.1	96556.1	1.55147e+07	1.58139e+07	1.48584e+07	1.50275e+07	1.5427e+07	1.5427e+07
1994	8708.66	8708.66	8708.66	8708.66	8708.66	8708.66	1.1	0.38	118597	125338	104649	108133	116666	116666	1.55917e+07	1.58923e+07	1.49322e+07	1.5102e+07	1.55036e+07	1.55036e+07	99570.4	105230	87860.4	90784.9	97949.6	97949.6	1.55917e+07	1.58923e+07	1.49322e+07	1.5102e+07	1.55036e+07	1.55036e+07	99570.4	105230	87860.4	90784.9	97949.6	97949.6	1.55917e+07	1.58923e+07	1.49322e+07	1.5102e+07	1.55036e+07	1.55036e+07
1995	8850.92	8850.92	8850.92	8850.92	8850.92	8850.92	1.1	0.38	120730	127592	106531	110077	118765	118765	1.5688e+07	1.59905e+07	1.50244e+07	1.51953e+07	1.55993e+07	1.55993e+07	101361	107122	89440.5	92417.5	99711	99711	1.5688e+07	1.59905e+07	1.50244e+07	1.51953e+07	1.55993e+07	1.55993e+07	101361	107122	89440.5	92417.5	99711	99711	1.5688e+07	1.59905e+07	1.50244e+07	1.51953e+07	1.55993e+07	1.55993e+07
1996	9053.37	9053.37	9053.37	9053.37	9053.37	9053.37	1.1	0.38	123771	130806	109215	112850	121756	121756	1.58234e+07	1.61285e+07	1.51541e+07	1.53265e+07	1.5734e+07	1.5734e+07	103914	109820	91693.4	94745.4	102223	102223	1.58234e+07	1.61285e+07	1.51541e+07	1.53265e+07	1.5734e+07	1.5734e+07	103914	109820	91693.4	94745.4	102223	102223	1.58234e+07	1.61285e+07	1.51541e+07	1.53265e+07	1.5734e+07	1.5734e+07
1997	9276.7	9276.7	9276.7	9276.7	9276.7	9276.7	1.1	0.38	127133	134359	112182	115916	125064	125064	1.59706e+07	1.62785e+07	1.5295e+07	1.5469e+07	1.58803e+07	1.58803e+07	106737	112804	94184.5	97319.4	105000	105000	1.59706e+07	1.62785e+07	1.5295e+07	1.5469e+07	1.58803e+07	1.58803e+07	106737	112804	94184.5	97319.4	105000	105000	1.59706e+07	1.62785e+07	1.5295e+07	1.5469e+07	1.58803e+07	1.58803e+07
1998	9379.84	9379.84	9379.84	9379.84	9379.84	9379.84	1.1	0.38	128689	136004	113555	117334	126594	126594	1.60379e+07	1.63471e+07	1.53594e+07	1.55342e+07	1.59472e+07	1.59472e+07	108043	114184	95337	98510.3	106285	106285	1.60379e+07	1.63471e+07	1.53594e+07	1.55342e+07	1.59472e+07	1.59472e+07	108043	114184	95337	98510.3	106285	106285	1.60379e+07	1.63471e+07	1.53594e+07	1.55342e+07	1.59472e+07	1.59472e+07
1999	9579.64	9579.64	9579.64	9579.64	9579.64	9579.64	1.1	0.38	131708	139194	116218	120087	129564	129564	1.61668e+07	1.64785e+07	1.5483e+07	1.56591e+07	1.60754e+07	1.60754e+07	110578	116863	97573.2	100821	108778	108778	1.61668e+07	1.64785e+07	1.5483e+07	1.56591e+07	1.60754e+07	1.60754e+07	110578	116863	97573.2	100821	108778	108778	1.61668e+07	1.64785e+07	1.5483e+07	1.56591e+07	1.60754e+07	1.60754e+07
2000	9900.75	9900.75	9900.75	9900.75	9900.75	9900.75	1.1	0.38	136572	144335	120511	124522	134349	134349	1.63707e+07	1.66863e+07	1.56782e+07	1.58565e+07	1.62781e+07	1.62781e+07	114662	121179	101177	104545	112795	112795	1.63707e+07	1.66863e+07	1.56782e+07	1.58565e+07	1.62781e+07	1.62781e+07	114662	121179	101177	104545	112795	112795	1.63707e+07	1.66863e+07	1.56782e+07	1.58565e+07	1.62781e+07	1.62781e+07
2001	9995.63	9995.63	9995.63	9995.63	9995.63	9995.63	1.1	0.38	138012	145857	121782	125835	135766	135766	1.64301e+07	1.67469e+07	1.57351e+07	1.59141e+07	1.63372e+07	1.63372e+07	115871	122457	102244	105647	113985	113985	1.64301e+07	1.67469e+07	1.57351e+07	1.59141e+07	1.63372e+07	1.63372e+07	115871	122457	102244	105647	113985	113985	1.64301e+07	1.67469e+07	1.57351e+07	1.59141e+07	1.63372e+07	1.63372e+07
2002	10129.8	10129.8	10129.8	10129.8	10129.8	10129.8	1.1	0.38	140051	148011	123581	127694	137772	137772	1.65135e+07	1.68319e+07	1.5815e+07	1.59949e+07	1.64202e+07	1.64202e+07	117583	124266	103754	107208	115669	115669	1.65135e+07	1.68319e+07	1.5815e+07	1.59949e+07	1.64202e+07	1.64202e+07	117583	124266	103754	107208	115669	115669	1.65135e+07	1.68319e+07	1.5815e+07	1.59949e+07	1.64202e+07	1.64202e+07
2003	10368.1	10368.1	10368.1	10368.1	10368.1	10368.1	1.1	0.38	143680	151846	126782	131002	141341	141341	1.66601e+07	1.69813e+07	1.59554e+07	1.61369e+07	1.65659e+07	1.65659e+07	120629	127485	106443	109986	118666	118666	1.66601e+07	1.69813e+07	1.59554e+07	1.61369e+07	1.65659e+07	1.65659e+07	120629	127485	106443	109986	118666	118666	1.66601e+07	1.69813e+07	1.59554e+07	1.61369e+07	1.65659e+07	1.65659e+07
2004	10754.4	10754.4	10754.4	10754.4	10754.4	10754.4	1.1	0.38	149580	158082	131989	136382	147145	147145	1.68933e+07	1.72191e+07	1.61787e+07	1.63628e+07	1.67978e+07	1.67978e+07	125583	132721	110814	114502	123539	123539	1.68933e+07	1.72191e+07	1.61787e+07	1.63628e+07	1.67978e+07	1.67978e+07	125583	132721	110814	114502	123539	123539	1.68933e+07	1.72191e+07	1.61787e+07	1.63628e+07	1.67978e+07	1.67978e+07
2005	11098.5	11098.5	11098.5	11098.5	11098.5	11098.5	1.1	0.38	154853	163655	136642	141190	152332	152332	1.70967e+07	1.74264e+07	1.63735e+07	1.65598e+07	1.70001e+07	1.70001e+07	130010	137399	114720	118539	127894	127894	1.70967e+07	1.74264e+07	1.63735e+07	1.65598e+07	1.70001e+07	1.70001e+07	130010	137399	114720	118539	127894	127894	1.70967e+07	1.74264e+07	1.63735e+07	1.65598e+07	1.70001e+07	1.70001e+07
2006	11516.9	11516.9	11516.9	11516.9	11516.9	11516.9	1.1	0.38	161285	170452	142318	147055	158660	158660	1.73388e+07	1.76731e+07	1.66054e+07	1.67943e+07	1.72408e+07	1.72408e+07	135410	143107	119485	123462	133206	133206	1.73388e+07	1.76731e+07	1.66054e+07	1.67943e+07	1.72408e+07	1.72408e+07	135410	143107	119485	123462	133206	133206	1.73388e+07	1.76731e+07	1.66054e+07	1.67943e+07	1.72408e+07	1.72408e+07
2007	11951.4	11951.4	11951.4	11951.4	11951.4	11951.4	1.1	0.38	167992	177541	148236	153170	165258	165258	1.75846e+07	1.79236e+07	1.68407e+07	1.70323e+07	1.74852e+07	1.74852e+07	141041	149058	124454	128597	138745	138745	1.75846e+07	1.79236e+07	1.68407e+07	1.70323e+07	1.74852e+07	1.74852e+07	141041	149058	124454	128597	138745	138745	1.75846e+07	1.79236e+07	1.68407e+07	1.70323e+07	1.74852e+07	1.74852e+07
2008	12118.7	12118.7	12118.7	12118.7	12118.7	12118.7	1.1	0.38	170580	180275	150519	155529	167803	167803	1.76777e+07	1.80185e+07	1.69299e+07	1.71225e+07	1.75777e+07	1.75777e+07	143213	151353	126371	130577	140882	140882	1.76777e+07	1.80185e+07	1.69299e+07	1.71225e+07	1.75777e+07	1.75777e+07	143213	151353	126371	130577	140882	140882	1.76777e+07	1.80185e+07	1.69299e+07	1.71225e+07	1.75777e+07	1.75777e+07
2009	11875.3	11875.3	11875.3	11875.3	11875.3	11875.3	1.1	0.38	166815	176297	147197	152096	164100	164100	1.75419e+07	1.78801e+07	1.67999e+07	1.6991e+07	1.74427e+07	1.74427e+07	140053	148013	123582	127695	137773	137773	1.75419e+07	1.78801e+07	1.67999e+07	1.6991e+07	1.74427e+07	1.74427e+07	140053	148013	123582	127695	137773	137773	1.75419e+07	1.78801e+07	1.67999e+07	1.6991e+07	1.74427e+07	1.74427e+07
2010	12318.8	12318.8	12318.8	12318.8	12318.8	12318.8	1.1	0.38	173681	183553	153255	158357	170854	170854	1.7788e+07	1.8131e+07	1.70356e+07	1.72294e+07	1.76875e+07	1.76875e+07	145817	154105	128668	132951	143444	143444	1.7788e+07	1.8131e+07	1.70356e+07	1.72294e+07	1.76875e+07	1.76875e+07	145817	154105	128668	132951	143444	143444	1.7788e+07	1.8131e+07	1.70356e+07	1.72294e+07	1.76875e+07	1.76875e+07
2011	12633.1	12633.1	12633.1	12633.1	12633.1	12633.1	1.1	0.38	178561	188710	157561	162806	175654	175654	1.79591e+07	1.83054e+07	1.71994e+07	1.73951e+07	1.78576e+07	1.78576e+07	149914	158435	132284	136687	147474	147474	1.79591e+07	1.83054e+07	1.71994e+07	1.73951e+07	1.78576e+07	1.78576e+07	149914	158435	132284	136687	147474	147474	1.79591e+07	1.83054e+07	1.71994e+07	1.73951e+07	1.78576e+07	1.78576e+07
2012	12870.6	12870.6	12870.6	12870.6	12870.6	12870.6	1.1	0.38	182258	192618	160824	166177	179292	179292	1.80867e+07	1.84355e+07	1.73217e+07	1.75187e+07	1.79845e+07	1.79845e+07	153019	161716	135023	139517	150528	150528	1.80867e+07	1.84355e+07	1.73217e+07	1.75187e+07	1.79845e+07	1.79845e+07	153019	161716	135023	139517	150528	150528	1.80867e+07	1.84355e+07	1.73217e+07	1.75187e+07	1.79845e+07	1.79845e+07
2013	13119	13119	13119	13119	13119	13119	1.1	0.38	186130	196710	164241	169707	183101	183101	1.82186e+07	1.85698e+07	1.74479e+07	1.76464e+07	1.81156e+07	1.81156e+07	156269	165151	137891	142481	153726	153726	1.82186e+07	1.85698e+07	1.74479e+07	1.76464e+07	1.81156e+07	1.81156e+07	156269	165151	137891	142481	153726	153726	1.82186e+07	1.85698e+07	1.74479e+07	1.76464e+07	1.81156e+07	1.81156e+07
2014	13399.1	13399.1	13399.1	13399.1	13399.1	13399.1	1.1	0.38	190507	201335	168102	173698	187406	187406	1.83654e+07	1.87195e+07	1.75886e+07	1.77886e+07	1.82616e+07	1.82616e+07	159944	169034	141134	145831	157340	157340	1.83654e+07	1.87195e+07	1.75886e+07	1.77886e+07	1.82616e+07	1.82616e+07	159944	169034	141134	145831	157340	157340	1.83654e+07	1.87195e+07	1.75886e+07	1.77886e+07	1.82616e+07	1.82616e+07
2015	11202.9	9953.74	13038	12200	11617.9	11617.9	1.1	0.38	156455	145184	163126	156678	160191	160191	1.71576e+07	1.67202e+07	1.74069e+07	1.71661e+07	1.72981e+07	1.72981e+07	131355	121892	136956	131542	134491	134491	1.71576e+07	1.67202e+07	1.74069e+07	1.71661e+07	1.72981e+07	1.72981e+07	131355	121892	136956	131542	134491	134491	1.71576e+07	1.67202e+07	1.74069e+07	1.71661e+07	1.72981e+07	1.72981e+07
2016	11645.6	10613.5	13351.4	12676.1	11962.7	11962.7	1.1	0.38	163269	155805	167444	163416	165429	165429	1.74122e+07	1.7133e+07	1.75647e+07	1.74176e+07	1.74914e+07	1.74914e+07	137076	130809	140581	137199	138889	138889	1.74122e+07	1.7133e+07	1.75647e+07	1.74176e+07	1.74914e+07	1.74914e+07	137076	130809	140581	137199	138889	138889	1.74122e+07	1.7133e+07	1.75647e+07	1.74176e+07	1.74914e+07	1.74914e+07
2017	12079.6	11259.6	13675.9	13143	12321.1	12321.1	1.1	0.38	169975	166268	171926	170049	170889	170889	1.7656e+07	1.7522e+07	1.77258e+07	1.76586e+07	1.76887e+07	1.76887e+07	142706	139594	144344	142767	143473	143473	1.7656e+07	1.7522e+07	1.77258e+07	1.76586e+07	1.76887e+07	1.76887e+07	142706	139594	144344	142767	143473	143473	1.7656e+07	1.7522e+07	1.77258e+07	1.76586e+07	1.76887e+07	1.76887e+07
2018	12508.4	11895.3	14015.2	13604.2	12696.4	12696.4	1.1	0.38	176624	176624	176624	176624	176624	176624	17891594	17891594	17891594	17891594	17891594	17891594	148288	148288	148288	148288	148288	148288	17891594	17891594	17891594	17891594	17891594	17891594	148288	148288	148288	148288	148288	148288	17891594	17891594	17891594	17891594	17891594	17891594
2019	12932.7	12522	14369.9	14060.6	13089.6	13089.6	1.1	0.38	183226	186886	181548	183154	182650	182650	1.81198e+07	1.82441e+07	1.80623e+07	1.81174e+07	1.81001e+07	1.81001e+07	153831	156904	152422	153770	153347	153347	1.81198e+07	1.82441e+07	1.80623e+07	1.81174e+07	1.81001e+07	1.81001e+07	153831	156904	152422	153770	153347	153347	1.81198e+07	1.82441e+07	1.80623e+07	1.81174e+07	1.81001e+07	1.81001e+07
2020	15001	14876.2	14988.9	15001	14876.2	14988.9	1.1	0.38	215705	225880	190168	196673	210253	212005	1.91707e+07	1.94784e+07	1.83541e+07	1.85686e+07	1.90019e+07	1.90565e+07	181099	189642	159659	165120	176522	177993	1.91707e+07	1.94784e+07	1.83541e+07	1.85686e+07	1.90019e+07	1.90565e+07	181099	189642	159659	165120	176522	177993	1.91707e+07	1.94784e+07	1.83541e+07	1.85686e+07	1.90019e+07	1.90565e+07
2021	15672.1	15454.8	15776	15674.5	15458.4	15783	1.1	0.38	226343	235561	201181	206406	219321	224393	1.94922e+07	1.97628e+07	1.87146e+07	1.88811e+07	1.92811e+07	1.9434e+07	190031	197770	168905	173292	184135	188393	1.94922e+07	1.97628e+07	1.87146e+07	1.88811e+07	1.92811e+07	1.9434e+07	190031	197770	168905	173292	184135	188393	1.94922e+07	1.97628e+07	1.87146e+07	1.88811e+07	1.92811e+07	1.9434e+07
2022	16211.5	15864	16424.8	16216.1	15871.2	16438.7	1.1	0.38	234927	242432	210300	214266	225772	234668	1.97444e+07	1.99601e+07	1.90034e+07	1.91264e+07	1.94752e+07	1.97369e+07	197237	203538	176561	179891	189551	197020	1.97444e+07	1.99601e+07	1.90034e+07	1.91264e+07	1.94752e+07	1.97369e+07	197237	203538	176561	179891	189551	197020	1.97444e+07	1.99601e+07	1.90034e+07	1.91264e+07	1.94752e+07	1.97369e+07
2023	16742.3	16264.7	17062.8	16749.2	16275.4	17083.6	1.1	0.38	243401	249177	219304	222026	232105	244814	1.99876e+07	2.01502e+07	1.92806e+07	1.93629e+07	1.96622e+07	2.00276e+07	204352	209201	184121	186406	194868	205538	1.99876e+07	2.01502e+07	1.92806e+07	1.93629e+07	1.96622e+07	2.00276e+07	204352	209201	184121	186406	194868	205538	1.99876e+07	2.01502e+07	1.92806e+07	1.93629e+07	1.96622e+07	2.00276e+07
2024	17264.6	16657.2	17690.4	17273.8	16671.2	17717.9	1.1	0.38	251768	255798	228193	229687	238322	254831	2.02224e+07	2.03336e+07	1.95471e+07	1.95912e+07	1.98426e+07	2.0307e+07	211376	214760	191583	192838	200088	213948	2.02224e+07	2.03336e+07	1.95471e+07	1.95912e+07	1.98426e+07	2.0307e+07	211376	214760	191583	192838	200088	213948	2.02224e+07	2.03336e+07	1.95471e+07	1.95912e+07	1.98426e+07	2.0307e+07
2025	17778.8	17041.6	18307.7	17790.1	17059	18341.8	1.1	0.38	260027	262299	236967	237250	244426	264719	2.04491e+07	2.05107e+07	1.98035e+07	1.98117e+07	2.00167e+07	2.05759e+07	218311	220218	198950	199188	205213	222250	2.04491e+07	2.05107e+07	1.98035e+07	1.98117e+07	2.00167e+07	2.05759e+07	218311	220218	198950	199188	205213	222250	2.04491e+07	2.05107e+07	1.98035e+07	1.98117e+07	2.00167e+07	2.05759e+07
2026	18461.4	17463.3	19205.8	18474.5	17489.1	19250.8	1.1	0.38	271031	269447	249785	247309	251213	279185	2.0744e+07	2.07021e+07	2.01672e+07	2.00979e+07	2.0207e+07	2.09575e+07	227549	226219	209711	207633	210911	234395	2.0744e+07	2.07021e+07	2.01672e+07	2.00979e+07	2.0207e+07	2.09575e+07	227549	226219	209711	207633	210911	234395	2.0744e+07	2.07021e+07	2.01672e+07	2.00979e+07	2.0207e+07	2.09575e+07
2027	19137.2	17878.8	20094.3	19152	17912.8	20150.1	1.1	0.38	281964	276508	262525	257303	257917	293565	2.10294e+07	2.08879e+07	2.05168e+07	2.03749e+07	2.03917e+07	2.13243e+07	236728	232148	220408	216024	216539	246468	2.10294e+07	2.08879e+07	2.05168e+07	2.03749e+07	2.03917e+07	2.13243e+07	236728	232148	220408	216024	216539	246468	2.10294e+07	2.08879e+07	2.05168e+07	2.03749e+07	2.03917e+07	2.13243e+07
2028	19806.3	18288.4	20973.5	19822.7	18330.5	21040	1.1	0.38	292827	283483	275187	267233	264540	307857	2.13058e+07	2.10684e+07	2.08534e+07	2.06432e+07	2.0571e+07	2.16774e+07	245848	238004	231039	224361	222100	258467	2.13058e+07	2.10684e+07	2.08534e+07	2.06432e+07	2.0571e+07	2.16774e+07	245848	238004	231039	224361	222100	258467	2.13058e+07	2.10684e+07	2.08534e+07	2.06432e+07	2.0571e+07	2.16774e+07
2029	20468.8	18692	21843.5	20486.9	18742.2	21920.5	1.1	0.38	303618	290374	287769	277099	271082	322059	2.15738e+07	2.12439e+07	2.11779e+07	2.09033e+07	2.07454e+07	2.20178e+07	254909	243789	241602	232643	227592	270391	2.15738e+07	2.12439e+07	2.11779e+07	2.09033e+07	2.07454e+07	2.20178e+07	254909	243789	241602	232643	227592	270391	2.15738e+07	2.12439e+07	2.11779e+07	2.09033e+07	2.07454e+07	2.20178e+07
2030	21124.7	19089.9	22704.4	21144.5	19147.9	22791.9	1.1	0.38	314338	297180	300269	286898	277545	336169	2.1834e+07	2.14147e+07	2.14913e+07	2.11558e+07	2.09149e+07	2.23463e+07	263909	249503	252097	240871	233018	282237	2.1834e+07	2.14147e+07	2.14913e+07	2.11558e+07	2.09149e+07	2.23463e+07	263909	249503	252097	240871	233018	282237	2.1834e+07	2.14147e+07	2.14913e+07	2.11558e+07	2.09149e+07	2.23463e+07
2031	21910.9	19523.7	23815.4	21936.9	19590.2	23915.8	1.1	0.38	327230	304616	316471	298747	284605	354449	2.21393e+07	2.15983e+07	2.1885e+07	2.14536e+07	2.10972e+07	2.27589e+07	274732	255746	265699	250819	238945	297584	2.21393e+07	2.15983e+07	2.1885e+07	2.14536e+07	2.10972e+07	2.27589e+07	274732	255746	265699	250819	238945	297584	2.21393e+07	2.15983e+07	2.1885e+07	2.14536e+07	2.10972e+07	2.27589e+07
2032	22690.7	19952	24916.7	22723	20026.9	25030	1.1	0.38	340064	311975	332606	310543	291591	372654	2.24354e+07	2.17771e+07	2.22642e+07	2.17425e+07	2.12747e+07	2.31561e+07	285507	261925	279246	260722	244810	312869	2.24354e+07	2.17771e+07	2.22642e+07	2.17425e+07	2.12747e+07	2.31561e+07	285507	261925	279246	260722	244810	312869	2.24354e+07	2.17771e+07	2.22642e+07	2.17425e+07	2.12747e+07	2.31561e+07
2033	23464.3	20374.9	26008.5	23502.7	20458.1	26134.5	1.1	0.38	352838	319257	348672	322285	298504	390782	2.27231e+07	2.19514e+07	2.263e+07	2.20231e+07	2.14476e+07	2.35392e+07	296232	268038	292734	270580	250615	328089	2.27231e+07	2.19514e+07	2.263e+07	2.20231e+07	2.14476e+07	2.35392e+07	296232	268038	292734	270580	250615	328089	2.27231e+07	2.19514e+07	2.263e+07	2.20231e+07	2.14476e+07	2.35392e+07
2034	24231.7	20792.6	27090.8	24276.1	20883.9	27229.5	1.1	0.38	365552	326464	364666	333971	305346	408830	2.30026e+07	2.21213e+07	2.29834e+07	2.22957e+07	2.16161e+07	2.39092e+07	306906	274089	306162	280391	256359	343241	2.30026e+07	2.21213e+07	2.29834e+07	2.22957e+07	2.16161e+07	2.39092e+07	306906	274089	306162	280391	256359	343241	2.30026e+07	2.21213e+07	2.29834e+07	2.22957e+07	2.16161e+07	2.39092e+07
2035	24992.9	21205.1	28163.9	25043.4	21304.5	28315	1.1	0.38	378204	333595	380586	345600	312117	426794	2.32746e+07	2.22871e+07	2.33252e+07	2.2561e+07	2.17805e+07	2.4267e+07	317528	280076	319528	290155	262044	358323	2.32746e+07	2.22871e+07	2.33252e+07	2.2561e+07	2.17805e+07	2.4267e+07	317528	280076	319528	290155	262044	358323	2.32746e+07	2.22871e+07	2.33252e+07	2.2561e+07	2.17805e+07	2.4267e+07
2036	25810.3	21630.5	29327.1	25865.5	21740.2	29498.9	1.1	0.38	391832	340965	397912	358100	319146	446464	2.3561e+07	2.2456e+07	2.36866e+07	2.28396e+07	2.19488e+07	2.46477e+07	328970	286263	334074	300650	267945	374837	2.3561e+07	2.2456e+07	2.36866e+07	2.28396e+07	2.19488e+07	2.46477e+07	328970	286263	334074	300650	267945	374837	2.3561e+07	2.2456e+07	2.36866e+07	2.28396e+07	2.19488e+07	2.46477e+07
2037	26622.9	22051.4	30482.6	26682.8	22171.2	30675	1.1	0.38	405424	348270	415191	370565	326113	466081	2.38402e+07	2.2621e+07	2.4037e+07	2.31111e+07	2.21131e+07	2.50166e+07	340381	292396	348581	311115	273794	391307	2.38402e+07	2.2621e+07	2.4037e+07	2.31111e+07	2.21131e+07	2.50166e+07	340381	292396	348581	311115	273794	391307	2.38402e+07	2.2621e+07	2.4037e+07	2.31111e+07	2.21131e+07	2.50166e+07
2038	27430.8	22467.8	31630.5	27495.2	22597.7	31843.2	1.1	0.38	418976	355511	432421	382995	333019	485644	2.41125e+07	2.27824e+07	2.43771e+07	2.33761e+07	2.22738e+07	2.53744e+07	351759	298476	363047	321550	279593	407732	2.41125e+07	2.27824e+07	2.43771e+07	2.33761e+07	2.22738e+07	2.53744e+07	351759	298476	363047	321550	279593	407732	2.41125e+07	2.27824e+07	2.43771e+07	2.33761e+07	2.22738e+07	2.53744e+07
2039	28233.8	22879.8	32770.8	28302.8	23019.6	33003.8	1.1	0.38	432488	362688	449599	395387	339865	505149	2.43784e+07	2.29402e+07	2.47073e+07	2.36346e+07	2.24309e+07	2.5722e+07	363103	304502	377470	331955	285340	424108	2.43784e+07	2.29402e+07	2.47073e+07	2.36346e+07	2.24309e+07	2.5722e+07	363103	304502	377470	331955	285340	424108	2.43784e+07	2.29402e+07	2.47073e+07	2.36346e+07	2.24309e+07	2.5722e+07
2040	29032.1	23287.5	33903.6	29105.7	23437.1	34156.8	1.1	0.38	445958	369803	466724	407743	346652	524595	2.4638e+07	2.30947e+07	2.50285e+07	2.38872e+07	2.25846e+07	2.60598e+07	374413	310475	391847	342328	291038	440433	2.4638e+07	2.30947e+07	2.50285e+07	2.38872e+07	2.25846e+07	2.60598e+07	374413	310475	391847	342328	291038	440433	2.4638e+07	2.30947e+07	2.50285e+07	2.38872e+07	2.25846e+07	2.60598e+07
2041	29884.5	23740.2	35141.5	29956.8	23893.1	35423.6	1.1	0.38	460381	377718	485504	420878	354079	546036	2.49104e+07	2.32643e+07	2.53719e+07	2.41503e+07	2.27506e+07	2.64229e+07	386521	317121	407614	353356	297274	458434	2.49104e+07	2.32643e+07	2.53719e+07	2.41503e+07	2.27506e+07	2.64229e+07	386521	317121	407614	353356	297274	458434	2.49104e+07	2.32643e+07	2.53719e+07	2.41503e+07	2.27506e+07	2.64229e+07
2042	30733.7	24188.9	36373.9	30804.9	24345.2	36684.7	1.1	0.38	474792	385579	504265	434003	361455	567457	2.51771e+07	2.34304e+07	2.57064e+07	2.44078e+07	2.29133e+07	2.67765e+07	398621	323720	423365	364375	303466	476419	2.51771e+07	2.34304e+07	2.57064e+07	2.44078e+07	2.29133e+07	2.67765e+07	398621	323720	423365	364375	303466	476419	2.51771e+07	2.34304e+07	2.57064e+07	2.44078e+07	2.29133e+07	2.67765e+07
2043	31579.9	24633.7	37600.8	31650	24793.3	37940.3	1.1	0.38	489192	393385	523006	447117	368779	588857	2.54383e+07	2.35932e+07	2.60325e+07	2.46601e+07	2.30726e+07	2.71211e+07	410710	330274	439100	375385	309616	494386	2.54383e+07	2.35932e+07	2.60325e+07	2.46601e+07	2.30726e+07	2.71211e+07	410710	330274	439100	375385	309616	494386	2.54383e+07	2.35932e+07	2.60325e+07	2.46601e+07	2.30726e+07	2.71211e+07
2044	32423	25074.6	38822.2	32491.9	25237.4	39190.2	1.1	0.38	503577	401137	541725	460218	376053	610232	2.56943e+07	2.37528e+07	2.63507e+07	2.49074e+07	2.32288e+07	2.74573e+07	422788	336782	454816	386385	315722	512332	2.56943e+07	2.37528e+07	2.63507e+07	2.49074e+07	2.32288e+07	2.74573e+07	422788	336782	454816	386385	315722	512332	2.56943e+07	2.37528e+07	2.63507e+07	2.49074e+07	2.32288e+07	2.74573e+07
2045	33263.1	25511.6	40038.3	33330.9	25677.7	40434.7	1.1	0.38	517949	408834	560420	473307	383276	631581	2.59453e+07	2.39093e+07	2.66613e+07	2.51499e+07	2.3382e+07	2.77854e+07	434854	343244	470511	397373	321786	530255	2.59453e+07	2.39093e+07	2.66613e+07	2.51499e+07	2.3382e+07	2.77854e+07	434854	343244	470511	397373	321786	530255	2.59453e+07	2.39093e+07	2.66613e+07	2.51499e+07	2.3382e+07	2.77854e+07
2046	34134.2	25985.1	41358.5	34195.2	26150.4	41775.9	1.1	0.38	532888	417188	580781	486824	391044	654663	2.62014e+07	2.40769e+07	2.69921e+07	2.53957e+07	2.35446e+07	2.81321e+07	447396	350258	487605	408722	328308	549635	2.62014e+07	2.40769e+07	2.69921e+07	2.53957e+07	2.35446e+07	2.81321e+07	447396	350258	487605	408722	328308	549635	2.62014e+07	2.40769e+07	2.69921e+07	2.53957e+07	2.35446e+07	2.81321e+07
2047	35004.2	26455.3	42675.8	35058.4	26619.9	43114.1	1.1	0.38	547847	425500	601160	500359	398773	677767	2.64532e+07	2.42416e+07	2.73156e+07	2.56374e+07	2.37043e+07	2.84712e+07	459955	357236	504715	420086	334797	569032	2.64532e+07	2.42416e+07	2.73156e+07	2.56374e+07	2.37043e+07	2.84712e+07	459955	357236	504715	420086	334797	569032	2.64532e+07	2.42416e+07	2.73156e+07	2.56374e+07	2.37043e+07	2.84712e+07
2048	35873.1	26922.3	43990	35920.5	27086.1	44449.2	1.1	0.38	562824	433769	621555	513910	406462	700890	2.67008e+07	2.44033e+07	2.76322e+07	2.58752e+07	2.38613e+07	2.8803e+07	472530	364179	521838	431463	341253	588445	2.67008e+07	2.44033e+07	2.76322e+07	2.58752e+07	2.38613e+07	2.8803e+07	472530	364179	521838	431463	341253	588445	2.67008e+07	2.44033e+07	2.76322e+07	2.58752e+07	2.38613e+07	2.8803e+07
2049	36740.9	27386.1	45301.2	36781.6	27549.1	45781.3	1.1	0.38	577820	441996	641965	527478	414112	724030	2.69444e+07	2.45622e+07	2.79424e+07	2.61092e+07	2.40155e+07	2.9128e+07	485119	371086	538973	442854	347676	607873	2.69444e+07	2.45622e+07	2.79424e+07	2.61092e+07	2.40155e+07	2.9128e+07	485119	371086	538973	442854	347676	607873	2.69444e+07	2.45622e+07	2.79424e+07	2.61092e+07	2.40155e+07	2.9128e+07
2050	37607.7	27846.7	46609.4	37641.6	28009	47110.3	1.1	0.38	592832	450181	662387	541060	421723	747183	2.71842e+07	2.47184e+07	2.82463e+07	2.63395e+07	2.4167e+07	2.94465e+07	497723	377958	556119	454257	354066	627312	2.71842e+07	2.47184e+07	2.82463e+07	2.63395e+07	2.4167e+07	2.94465e+07	497723	377958	556119	454257	354066	627312	2.71842e+07	2.47184e+07	2.82463e+07	2.63395e+07	2.4167e+07	2.94465e+07

## Sheet: boe_calc
Impact Indicator	Indicator unit	value	lower bound	upper bound	unit
Human Health	DALY	176624	148288	200236	US$ 2018 / DALY			Low-carbon diets can reduce global ecological and health costs | Nature Food
Ecosystem damage	species loss	17891594	4472899	44728985	US$ 2018 / species loss			Low-carbon diets can reduce global ecological and health costs | Nature Food
		stock
	reinforcing steel	7.96436e+11	7.96436e+11	7.96436e+11	kg
		Egalitarian	Hierarchical	Individualistic
		0.00054067	1.08333e-05	1.63171e-06	DALYs / kg
		1.36199e-07	9.44185e-09	4.51562e-09	species*years/ kg
		4.30609e+08	8.62804e+06	1.29956e+06	DALY
		108474	7519.82	3596.4	species*years
		7.60559e+13	1.27944e+12	2.60218e+11	US$ DALY
		1.94077e+12	3.36354e+10	1.60863e+11	US$ biodiv
		7.79967e+13	1.31307e+12	4.21081e+11	total US$
		77.9967	1.31307	0.421081	trillion US$
		97.9322	1.64868	0.528707	US$ / kg
		Egalitarian	Hierarchical	Individualistic
		97932.2	1648.68	528.707	externality cost	$US/kg
		500	500	500	production cost	$US/kg
		195.864	3.29737	1.05741	ext / prod
		Egalitarian	Hierarchical	Individualistic

## Sheet: historical
year	steel stock [Mt]	addition [Mt/a]	HH $/DALY	ED [$/species.yr	HH $ weighted	ED $ weighted	sum HH $	sum ED $	year HH	year ED
1960	1.43878		25731.7	9.19705e+06			82719.5	1.32423e+07	1992	1989
1961	1.57243	0.133653	26701.9	9.31539e+06	436.05	152123			year where weighted sum close to monetarization factor of that year
1962	1.66896	0.0965272	27708.7	9.43526e+06	326.799	111280
1963	1.78776	0.118803	28753.5	9.55668e+06	417.38	138723
1964	1.94369	0.155929	29837.7	9.67965e+06	568.466	184416
1965	2.12932	0.185629	30962.7	9.80421e+06	702.262	222368
1966	2.32237	0.193054	32130.1	9.93037e+06	757.891	234239
1967	2.51543	0.193054	33341.6	1.00582e+07	786.467	237253
1968	2.69363	0.178204	34598.8	1.01876e+07	753.342	221821
1969	2.85699	0.163354	35903.3	1.03187e+07	716.602	205952
1970	3.10944	0.252456	37257.1	1.04515e+07	1149.23	322386
1971	3.3916	0.282156	38661.8	1.05859e+07	1332.87	364950
1972	3.6292	0.237605	40119.6	1.07222e+07	1164.73	311281
1973	3.90393	0.274731	41632.3	1.08601e+07	1397.5	364550
1974	4.19499	0.291058	43202.1	1.09999e+07	1536.38	391184
1975	4.42554	0.230549	44831	1.11414e+07	1262.86	313848
1976	4.49052	0.0649812	46521.4	1.12848e+07	369.364	89597.4
1977	4.68653	0.196007	48275.5	1.143e+07	1156.14	273736
1978	4.88032	0.193793	50095.7	1.15771e+07	1186.18	274126
1979	5.01808	0.137757	51984.6	1.17261e+07	874.986	197369
1980	5.19033	0.172255	53944.6	1.1877e+07	1135.36	249972
1981	5.38113	0.190796	55978.6	1.20298e+07	1304.99	280441
1982	5.33699	-0.044138	58089.3	1.21846e+07	-313.273	-65710.9
1983	5.31472	-0.0222755	60279.6	1.23414e+07	-164.064	-33589.6
1984	5.29244	-0.0222755	62552.4	1.25002e+07	-170.25	-34021.9
1985	5.32214	0.0297007	64911	1.2661e+07	235.558	45946.2
1986	5.35927	0.0371259	67358.5	1.2824e+07	305.55	58171.8
1987	5.5152	0.155929	69898.2	1.2989e+07	1331.7	247465
1988	5.6043	0.089102	72533.8	1.31561e+07	789.663	143228
1989	5.77951	0.175208	75268.7	1.33254e+07	1611.32	285264
1990	6.00935	0.229846	78106.7	1.34969e+07	2193.51	379040
1991	6.16114	0.15179	81051.7	1.36706e+07	1503.21	253538
1992	6.27178	0.110639	84107.8	1.38465e+07	1137	187181
1993	6.37315	0.101369	87279.1	1.40246e+07	1081.01	173704
1994	6.46968	0.0965272	90569.9	1.42051e+07	1068.19	167536
1995	6.58442	0.114743	93984.9	1.43879e+07	1317.65	201715
1996	6.77411	0.189689	97528.6	1.4573e+07	2260.41	337758
1997	6.95342	0.179311	101206	1.47606e+07	2217.32	323389
1998	7.10229	0.148872	105022	1.49505e+07	1910.33	271947
1999	7.30204	0.199741	108982	1.51429e+07	2659.72	369565
2000	7.37891	0.0768791	113091	1.53377e+07	1062.31	144073
2001	7.50514	0.126228	117355	1.55351e+07	1809.97	239598
2002	7.62395	0.118803	121780	1.5735e+07	1767.73	228406
2003	7.7576	0.133653	126372	1.59375e+07	2063.68	260263
2004	7.89125	0.133653	131137	1.61426e+07	2141.49	263612
2005	8.09431	0.203063	136081	1.63503e+07	3376.31	405668
2006	8.27289	0.178573	141212	1.65607e+07	3081.07	361334
2007	8.43809	0.165199	146536	1.67738e+07	2957.79	338573
2008	8.60144	0.163354	152062	1.69896e+07	3035.03	339100
2009	8.71545	0.114005	157795	1.72083e+07	2198.02	239704
2010	8.78227	0.0668265	163745	1.74297e+07	1337	142316
2011	8.90107	0.118803	169919	1.7654e+07	2466.51	256261
2012	9.07185	0.170779	176326	1.78812e+07	3679.29	373116
2013	9.22778	0.155929	182974	1.81112e+07	3486.02	345055
2014	9.31688	0.089102	189873	1.83443e+07	2067.12	199711
2015	9.49509	0.178204	197032	1.85804e+07	4290.12	404563
2016	9.70299	0.207905	204462	1.88194e+07	5193.86	478063
2017	9.86635	0.163354	212171	1.90616e+07	4234.76	380455
2018	9.96287	0.0965272	220171	1.93069e+07	2596.71	227707
2019	9.94544	-0.0174338	228472	1.95553e+07	-486.675	-41655.3
2020	10.0586	0.113179	237087	1.9807e+07	3278.59	273904
2021	9.74455	-0.314072	246026	2.00618e+07	-9441.13	-769863
2022	9.62316	-0.121386	255303	2.032e+07	-3786.51	-301375

## Sheet: GDP_per_capita
	GDP bn US$ 2010								Population
	Remind 2.1 NDC			Remind 2.1 NPi					Remind 2.1 NDC			Remind 2.1 NPi
year	SSP1	SSP2	SSP5	SSP1	SSP2	SSP5		year	SSP1	SSP2	SSP5	SSP1	SSP2	SSP5
1980	34135	34135	34135	34135	34135	34135		1980	4447606208	4447606208	4447606208	4447606208	4447606208	4447606208
1981	35163.3	35163.3	35163.3	35163.3	35163.3	35163.3		1981	4528777285	4528777285	4528777285	4528777285	4528777285	4528777285
1982	36222.5	36222.5	36222.5	36222.5	36222.5	36222.5		1982	4612673436	4612673436	4612673436	4612673436	4612673436	4612673436
1983	37313.7	37313.7	37313.7	37313.7	37313.7	37313.7		1983	4697327604	4697327604	4697327604	4697327604	4697327604	4697327604
1984	38437.7	38437.7	38437.7	38437.7	38437.7	38437.7		1984	4782175500	4782175500	4782175500	4782175500	4782175500	4782175500
1985	39595.6	39595.6	39595.6	39595.6	39595.6	39595.6		1985	4868943460	4868943460	4868943460	4868943460	4868943460	4868943460
1986	40788.3	40788.3	40788.3	40788.3	40788.3	40788.3		1986	4958072822	4958072822	4958072822	4958072822	4958072822	4958072822
1987	42017	42017	42017	42017	42017	42017		1987	5049746378	5049746378	5049746378	5049746378	5049746378	5049746378
1988	43282.7	43282.7	43282.7	43282.7	43282.7	43282.7		1988	5141992550	5141992550	5141992550	5141992550	5141992550	5141992550
1989	44586.6	44586.6	44586.6	44586.6	44586.6	44586.6		1989	5234431714	5234431714	5234431714	5234431714	5234431714	5234431714
1990	45929.7	45929.7	45929.7	45929.7	45929.7	45929.7		1990	5327803075	5327803075	5327803075	5327803075	5327803075	5327803075
1991	46530.4	46530.4	46530.4	46530.4	46530.4	46530.4		1991	5418735879	5418735879	5418735879	5418735879	5418735879	5418735879
1992	47273.2	47273.2	47273.2	47273.2	47273.2	47273.2		1992	5505989821	5505989821	5505989821	5505989821	5505989821	5505989821
1993	48064.7	48064.7	48064.7	48064.7	48064.7	48064.7		1993	5591544841	5591544841	5591544841	5591544841	5591544841	5591544841
1994	49426.5	49426.5	49426.5	49426.5	49426.5	49426.5		1994	5675551281	5675551281	5675551281	5675551281	5675551281	5675551281
1995	50971.4	50971.4	50971.4	50971.4	50971.4	50971.4		1995	5758878997	5758878997	5758878997	5758878997	5758878997	5758878997
1996	52890.3	52890.3	52890.3	52890.3	52890.3	52890.3		1996	5842055726	5842055726	5842055726	5842055726	5842055726	5842055726
1997	54962.5	54962.5	54962.5	54962.5	54962.5	54962.5		1997	5924787787	5924787787	5924787787	5924787787	5924787787	5924787787
1998	56345.3	56345.3	56345.3	56345.3	56345.3	56345.3		1998	6007066714	6007066714	6007066714	6007066714	6007066714	6007066714
1999	58330.5	58330.5	58330.5	58330.5	58330.5	58330.5		1999	6089006330	6089006330	6089006330	6089006330	6089006330	6089006330
2000	61104.5	61104.5	61104.5	61104.5	61104.5	61104.5		2000	6171703018	6171703018	6171703018	6171703018	6171703018	6171703018
2001	62522	62522	62522	62522	62522	62522		2001	6254936479	6254936479	6254936479	6254936479	6254936479	6254936479
2002	64199.8	64199.8	64199.8	64199.8	64199.8	64199.8		2002	6337730319	6337730319	6337730319	6337730319	6337730319	6337730319
2003	66566.9	66566.9	66566.9	66566.9	66566.9	66566.9		2003	6420361649	6420361649	6420361649	6420361649	6420361649	6420361649
2004	69940.2	69940.2	69940.2	69940.2	69940.2	69940.2		2004	6503377778	6503377778	6503377778	6503377778	6503377778	6503377778
2005	73105.8	73105.8	73105.8	73105.8	73105.8	73105.8		2005	6586970145	6586970145	6586970145	6586970145	6586970145	6586970145
2006	76834.3	76834.3	76834.3	76834.3	76834.3	76834.3		2006	6671452018	6671452018	6671452018	6671452018	6671452018	6671452018
2007	80759.6	80759.6	80759.6	80759.6	80759.6	80759.6		2007	6757308750	6757308750	6757308750	6757308750	6757308750	6757308750
2008	82945.6	82945.6	82945.6	82945.6	82945.6	82945.6		2008	6844457675	6844457675	6844457675	6844457675	6844457675	6844457675
2009	82328.6	82328.6	82328.6	82328.6	82328.6	82328.6		2009	6932766459	6932766459	6932766459	6932766459	6932766459	6932766459
2010	86499.3	86499.3	86499.3	86499.3	86499.3	86499.3		2010	7021732131	7021732131	7021732131	7021732131	7021732131	7021732131
2011	89832.7	89832.7	89832.7	89832.7	89832.7	89832.7		2011	7110923797	7110923797	7110923797	7110923797	7110923797	7110923797
2012	92684.1	92684.1	92684.1	92684.1	92684.1	92684.1		2012	7201202531	7201202531	7201202531	7201202531	7201202531	7201202531
2013	95660.9	95660.9	95660.9	95660.9	95660.9	95660.9		2013	7291793608	7291793608	7291793608	7291793608	7291793608	7291793608
2014	98907.1	98907.1	98907.1	98907.1	98907.1	98907.1		2014	7381616239	7381616239	7381616239	7381616239	7381616239	7381616239
2015	83691	74359.3	97400.5	91140.3	86791.1	86791.1		2015	7470491904	7470491904	7470491904	7470491904	7470491904	7470491904
2016	88023.6	80222.8	100917	95813.1	90420.9	90420.9		2016	7558554580	7558554580	7558554580	7558554580	7558554580	7558554580
2017	92356.2	86086.3	104561	100486	94202.5	94202.5		2017	7645618013	7645618013	7645618013	7645618013	7645618013	7645618013
2018	96688.8	91949.8	108336	105159	98142.2	98142.2		2018	7729902724	7729902724	7729902724	7729902724	7729902724	7729902724
2019	101021	97813.3	112248	109832	102247	102247		2019	7811293714	7811293714	7811293714	7811293714	7811293714	7811293714
2020	114763	114763	114763	114763	114763	114763		2020	7650338200	7714516100	7656529400	7650338200	7714516100	7656529400
2021	119897	119226	120789	119915	119254	120843		2021	7650338200	7714516100	7656529400	7650338200	7714516100	7656529400
2022	125031	123689	126815	125067	123745	126923		2022	7712475700	7796818225	7720982525	7712475700	7796818225	7720982525
2023	130165	128152	132841	130218	128236	133003		2023	7774613200	7.87912e+09	7785435650	7774613200	7.87912e+09	7785435650
2024	135299	132615	138868	135370	132727	139083		2024	7.83675e+09	7.96142e+09	7849888775	7.83675e+09	7.96142e+09	7849888775
2025	140432	137078	144894	140522	137218	145163		2025	7898888200	8043724600	7914341900	7898888200	8043724600	7914341900
2026	146560	141509	152814	146664	141718	153172		2026	7938748420	8103249360	7956687160	7938748420	8103249360	7956687160
2027	152688	145941	160735	152806	146219	161181		2027	7978608640	8162774120	7999032420	7978608640	8162774120	7999032420
2028	158816	150372	168656	158948	150719	169190		2028	8018468860	8222298880	8041377680	8018468860	8222298880	8041377680
2029	164944	154804	176577	165090	155219	177199		2029	8058329080	8.28182e+09	8083722940	8058329080	8.28182e+09	8083722940
2030	171072	159236	184497	171232	159720	185209		2030	8098189300	8.34135e+09	8126068200	8098189300	8.34135e+09	8126068200
2031	178161	163893	194375	178372	164452	195195		2031	8131140200	8.3946e+09	8161731620	8131140200	8.3946e+09	8161731620
2032	185249	168551	204252	185512	169184	205181		2032	8164091100	8.44785e+09	8.1974e+09	8164091100	8.44785e+09	8.1974e+09
2033	192338	173209	214129	192652	173916	215167		2033	8.19704e+09	8.50109e+09	8233058460	8.19704e+09	8.50109e+09	8233058460
2034	199426	177867	224007	199792	178648	225153		2034	8.22999e+09	8.55434e+09	8.26872e+09	8.22999e+09	8.55434e+09	8.26872e+09
2035	206515	182525	233884	206933	183380	235139		2035	8.26294e+09	8607591200	8304385300	8.26294e+09	8607591200	8304385300
2036	213905	187195	244356	214362	188144	245788		2036	8.28755e+09	8.65419e+09	8.33209e+09	8.28755e+09	8.65419e+09	8.33209e+09
2037	221294	191865	254828	221792	192907	256436		2037	8.31216e+09	8700789600	8359794340	8.31216e+09	8700789600	8359794340
2038	228684	196535	265300	229221	197671	267085		2038	8336772120	8747388800	8387498860	8336772120	8747388800	8387498860
2039	236074	201205	275773	236650	202434	277734		2039	8361381560	8793988000	8.4152e+09	8361381560	8793988000	8.4152e+09
2040	243463	205875	286245	244080	207198	288382		2040	8385991000	8840587200	8442907900	8385991000	8840587200	8442907900
2041	251065	210812	297361	251673	212170	299747		2041	8.40118e+09	8879963600	8.46181e+09	8.40118e+09	8879963600	8.46181e+09
2042	258666	215749	308476	259265	217143	311113		2042	8416362040	8919340000	8480713980	8416362040	8919340000	8480713980
2043	266267	220686	319592	266858	222116	322478		2043	8.43155e+09	8958716400	8499617020	8.43155e+09	8958716400	8499617020
2044	273869	225623	330708	274451	227089	333843		2044	8446733080	8998092800	8.51852e+09	8446733080	8998092800	8.51852e+09
2045	281470	230560	341824	282044	232061	345208		2045	8.46192e+09	9037469200	8537423100	8.46192e+09	9037469200	8537423100
2046	289020	235653	353500	289536	237152	357067		2046	8.46716e+09	9068780740	8547201620	8.46716e+09	9068780740	8547201620
2047	296569	240746	365176	297028	242243	368926		2047	8472394360	9100092280	8556980140	8472394360	9100092280	8556980140
2048	304119	245838	376851	304521	247334	380786		2048	8.47763e+09	9131403820	8.56676e+09	8.47763e+09	9131403820	8.56676e+09
2049	311668	250931	388527	312013	252425	392645		2049	8482870120	9162715360	8.57654e+09	8482870120	9162715360	8.57654e+09
2050	319218	256024	400203	319506	257516	404504		2050	8488108000	9194026900	8.58632e+09	8488108000	9194026900	8.58632e+09
								2051	8.48781e+09	9219049520	8591179360	8.48781e+09	9219049520	8591179360
								2052	8487506840	9244072140	8596043020	8487506840	9244072140	8596043020
								2053	8.48721e+09	9269094760	8600906680	8.48721e+09	9269094760	8600906680
								2054	8486905680	9294117380	8605770340	8486905680	9294117380	8605770340
								2055	8.48661e+09	9319140000	8610634000	8.48661e+09	9319140000	8610634000
								2056	8478013520	9335829880	8607845800	8478013520	9335829880	8607845800
								2057	8469421940	9352519760	8605057600	8469421940	9352519760	8605057600
								2058	8460830360	9369209640	8602269400	8460830360	9369209640	8602269400
								2059	8452238780	9385899520	8599481200	8452238780	9385899520	8599481200
								2060	8.44365e+09	9402589400	8596693000	8.44365e+09	9402589400	8596693000
								2061	8.42383e+09	9408871550	8.58347e+09	8.42383e+09	9408871550	8.58347e+09
								2062	8404013160	9415153700	8570240140	8404013160	9415153700	8570240140
								2063	8384196140	9.42144e+09	8.55701e+09	8384196140	9.42144e+09	8.55701e+09
								2064	8364379120	9427718000	8543787280	8364379120	9427718000	8543787280
								2065	8.34456e+09	9434000150	8530560850	8.34456e+09	9434000150	8530560850
								2066	8.32475e+09	9440282300	8.51733e+09	8.32475e+09	9440282300	8.51733e+09
								2067	8304928060	9.44656e+09	8504107990	8304928060	9.44656e+09	8504107990
								2068	8285111040	9452846600	8490881560	8285111040	9452846600	8490881560
								2069	8.26529e+09	9459128750	8.47766e+09	8.26529e+09	9459128750	8.47766e+09
								2070	8.24548e+09	9465410900	8464428700	8.24548e+09	9465410900	8464428700
								2071	8.212e+09	9459603400	8.43871e+09	8.212e+09	9459603400	8.43871e+09
								2072	8.17853e+09	9.4538e+09	8.413e+09	8.17853e+09	9.4538e+09	8.413e+09
								2073	8145058420	9447988400	8.38729e+09	8145058420	9447988400	8.38729e+09
								2074	8111585560	9.44218e+09	8.36157e+09	8111585560	9.44218e+09	8.36157e+09
								2075	8.07811e+09	9436373400	8.33586e+09	8.07811e+09	9436373400	8.33586e+09
								2076	8.04464e+09	9430565900	8.31014e+09	8.04464e+09	9430565900	8.31014e+09
								2077	8.01117e+09	9424758400	8.28443e+09	8.01117e+09	9424758400	8.28443e+09
								2078	7977694120	9418950900	8.25871e+09	7977694120	9418950900	8.25871e+09
								2079	7944221260	9413143400	8233000090	7944221260	9413143400	8233000090
								2080	7910748400	9407335900	8207285800	7910748400	9407335900	8207285800
								2081	7864896550	9391301850	8170357290	7864896550	9391301850	8170357290
								2082	7819044700	9375267800	8.13343e+09	7819044700	9375267800	8.13343e+09
								2083	7773192850	9359233750	8096500270	7773192850	9359233750	8096500270
								2084	7727341000	9343199700	8059571760	7727341000	9343199700	8059571760
								2085	7681489150	9.32717e+09	8022643250	7681489150	9.32717e+09	8022643250
								2086	7635637300	9311131600	7.98571e+09	7635637300	9311131600	7.98571e+09
								2087	7589785450	9295097550	7948786230	7589785450	9295097550	7948786230
								2088	7543933600	9279063500	7911857720	7543933600	9279063500	7911857720
								2089	7498081750	9263029450	7.87493e+09	7498081750	9263029450	7.87493e+09
								2090	7452229900	9246995400	7838000700	7452229900	9246995400	7838000700
								2091	7396942680	9224263630	7792374030	7396942680	9224263630	7792374030
								2092	7341655460	9201531860	7.74675e+09	7341655460	9201531860	7.74675e+09
								2093	7286368240	9178800090	7701120690	7286368240	9178800090	7701120690
								2094	7231081020	9156068320	7655494020	7231081020	9156068320	7655494020
								2095	7175793800	9133336550	7609867350	7175793800	9133336550	7609867350
								2096	7120506580	9110604780	7564240680	7120506580	9110604780	7564240680
								2097	7065219360	9087873010	7518614010	7065219360	9087873010	7518614010
								2098	7009932140	9065141240	7.47299e+09	7009932140	9065141240	7.47299e+09
								2099	6954644920	9042409470	7427360670	6954644920	9042409470	7427360670
								2100	6899357700	9019677700	7381734000	6899357700	9019677700	7381734000
