# Supplementary material for: Digesting fossil infrastructure for cleaner energy transitions
Source: Research Square preprint supplement (doi:10.21203/rs.3.rs-6346491/v1), 2025-06-06
Supplement: Supplementary file 53 [file LCA_utils_data.xlsx]

## Sheet: units_per_MW
	units per MW
wind turbine construction, 2MW, offshore, primary, optimistic	0.5
wind turbine construction, 2MW, offshore, secondary, optimistic	0.5
wind turbine construction, 4.5MW, onshore, secondary, optimistic	0.222222
wind turbine construction, 4.5MW, onshore, primary, optimistic	0.222222
wind turbine construction, 4.5MW, onshore, primary, pessimistic	0.222222
photovoltaic slanted-roof installation, 3kWp, single-Si, panel, mounted, on roof, steel, secondary	333
photovoltaic slanted-roof installation, 3kWp, single-Si, panel, mounted, on roof, default	333
photovoltaic open ground installation, 570 kWp, single-Si, on open ground, steel, secondary	1.75439
photovoltaic open ground installation, 570 kWp, single-Si, on open ground, default	1.75439

## Sheet: mat_dict
	material category
EUR-flat pallet	Other
Other	Other
alkyd paint, white, without water, in 60% solution state	Other
aluminium alloy, AlMg3	Aluminium
aluminium, cast alloy	Aluminium
aluminium, wrought alloy	Aluminium
cast iron	Iron
capacitor, electrolyte type, > 2cm height	Electronics
capacitor, film type, for through-hole mounting	Electronics
capacitor, tantalum-, for through-hole mounting	Electronics
chromium steel	Steel
concrete, normal strength	Concrete
waste reinforced concrete	Concrete
copper, cathode	Copper
corrugated board box	Other
diesel, burned in building machine	Other
diode, auxilliaries and energy use	Electronics
diode, glass-, for through-hole mounting	Electronics
electric connector, wire clamp	Electronics
electricity, medium voltage	Electricity
ethylvinylacetate, foil	Plastic
epoxy resin, liquid	Plastic
excavation, hydraulic digger	Other
glass fibre reinforced plastic, polyamide, injection moulded	Plastic
hydrogen fluoride	Other
inductor, ring core choke type	Other
integrated circuit, logic type	Electronics
light emitting diode	Electronics
low-alloyed steel	Steel
lubricating oil	Other
photovoltaic cell, single-Si wafer	Cell
photovoltaic cell, single-Si, at plant	Cell
polyethylene terephthalate, granulate, amorphous	Plastic
polyethylene, high density, granulate	Plastic
polyvinylfluoride, film	Plastic
printed wiring board, for through-hole mounting, Pb containing surface	Electronics
printed wiring board, for through-hole mounting, Pb free surface	Electronics
reinforcing steel	Steel
section bar extrusion, aluminium	Aluminium
section bar rolling, steel	Steel
sheet rolling, chromium steel	Steel
steel, chromium steel 18/8	Steel
steel, low-alloyed	Steel
lead	Lead
scrap copper	Copper
sheet rolling, steel	Steel
silicone product	Other
solar glass, low-iron	Glass
steel, chromium steel 18/8, hot rolled	Steel
steel, low-alloyed, hot rolled	Steel
tempering, flat glass	Glass
tin	Tin
road	Road
transistor, wired, small size, through-hole mounting	Electronics
transport, freight train	Transport
transport, freight, light commercial vehicle	Transport
transport, freight, lorry	Transport
transport, freight, sea, container ship	Transport
treatment, c-Si PV module	Other
waste electric wiring	Electronics
waste mineral oil	Other
waste plastic, industrial electronics	Plastic
waste plastic, mixture	Plastic
waste polyvinylchloride	Plastic
wire drawing, copper	Copper
wire drawing, steel	Steel
zinc coat, coils	Steel
zinc coat, pieces	Steel
alkyd paint, white, without solvent, in 60% solution state	Other
aluminium, primary, ingot	Aluminium
building, hall	Facility
electronics, for control units	Electronics
extrusion, plastic film	Plastic
glass fibre reinforced plastic, polyester resin, hand lay-up	Plastic
gravel, round	Gravel
heat, district or industrial, natural gas	Heat
heat, district or industrial, other than natural gas	Heat
lime, packed	Lime
packaging film, low density polyethylene	Plastic
polyethylene, low density, granulate	Plastic
polyvinylchloride, bulk polymerised	Plastic
polyvinylchloride, suspension polymerised	Plastic
silica sand	Sand
soda ash, light	Other
transport, freight, lorry 16-32 metric ton, EURO5	Transport
transport, freight, lorry 3.5-7.5 metric ton, EURO5	Transport
transport, freight, lorry, unspecified	Transport
transport, freight, lorry, unspecified	Transport
waste paint on metal	Other
waste polyethylene/polypropylene product	Plastic
waste glass	Glass
