# Supplementary material for: Digesting fossil infrastructure for cleaner energy transitions
Source: Research Square preprint supplement (doi:10.21203/rs.3.rs-6346491/v1), 2025-06-06
Supplement: Supplementary file 57 [file efficiencies.xlsx]

## Sheet: primary-low-alloyed
name	remind - SSP1-NDC - 2025	remind - SSP1-NDC - 2030	remind - SSP1-NDC - 2035	remind - SSP1-NDC - 2040	remind - SSP1-NDC - 2045	remind - SSP1-NDC - 2050	remind - SSP2-NDC - 2025	remind - SSP2-NDC - 2030	remind - SSP2-NDC - 2035	remind - SSP2-NDC - 2040	remind - SSP2-NDC - 2045	remind - SSP2-NDC - 2050	remind - SSP5-NDC - 2025	remind - SSP5-NDC - 2030	remind - SSP5-NDC - 2035	remind - SSP5-NDC - 2040	remind - SSP5-NDC - 2045	remind - SSP5-NDC - 2050	remind - SSP1-NPi - 2025	remind - SSP1-NPi - 2030	remind - SSP1-NPi - 2035	remind - SSP1-NPi - 2040	remind - SSP1-NPi - 2045	remind - SSP1-NPi - 2050	remind - SSP2-NPi - 2025	remind - SSP2-NPi - 2030	remind - SSP2-NPi - 2035	remind - SSP2-NPi - 2040	remind - SSP2-NPi - 2045	remind - SSP2-NPi - 2050	remind - SSP5-NPi - 2025	remind - SSP5-NPi - 2030	remind - SSP5-NPi - 2035	remind - SSP5-NPi - 2040	remind - SSP5-NPi - 2045	remind - SSP5-NPi - 2050
Carbon dioxide, fossil	1	0.988594	0.985219	0.978449	0.966397	0.93524	1.00105	0.955798	0.950334	0.935113	0.907917	0.899202	0.988312	0.853496	0.852204	0.826623	0.789838	0.788288	1.00095	1.00094	1.00094	1.00096	1.00101	1.00109	1.00106	1.00108	1.00111	1.00114	1.00119	1.00125	1.00108	1.00112	1.00117	1.00121	1.00125	1.00129
Carbon dioxide, non-fossil	1	1.41527	1.45599	1.42349	1.28123	0.985316	0.967769	1.50494	1.61881	1.65659	1.5347	1.30882	1.02534	1.2906	1.11834	0.95666	0.76396	0.562354	1.26112	1.29543	1.28641	1.23466	1.0889	0.831407	0.924529	0.860506	0.782636	0.681955	0.527283	0.337163	0.873569	0.732088	0.572375	0.46125	0.343998	0.226927
Carbon monoxide, fossil	1	1	1	1	1	1	1	1	1	1	1	1	1	1	1	1	1	1	1	1	1	1	1	1	1	1	1	1	1	1	1	1	1	1	1	1
Chromium III	1	1	1	1	1	1	1	1	1	1	1	1	1	1	1	1	1	1	1	1	1	1	1	1	1	1	1	1	1	1	1	1	1	1	1	1
Copper ion	1	1	1	1	1	1	1	1	1	1	1	1	1	1	1	1	1	1	1	1	1	1	1	1	1	1	1	1	1	1	1	1	1	1	1	1
Dioxins, measured as 2,3,7,8-tetrachlorodibenzo-p-dioxin	1	1	1	1	1	1	1	1	1	1	1	1	1	1	1	1	1	1	1	1	1	1	1	1	1	1	1	1	1	1	1	1	1	1	1	1
Heat, waste	1	1	1	1	1	1	1	1	1	1	1	1	1	1	1	1	1	1	1	1	1	1	1	1	1	1	1	1	1	1	1	1	1	1	1	1
Iron ion	1	1	1	1	1	1	1	1	1	1	1	1	1	1	1	1	1	1	1	1	1	1	1	1	1	1	1	1	1	1	1	1	1	1	1	1
Lead II	1	1	1	1	1	1	1	1	1	1	1	1	1	1	1	1	1	1	1	1	1	1	1	1	1	1	1	1	1	1	1	1	1	1	1	1
Manganese II	1	1	1	1	1	1	1	1	1	1	1	1	1	1	1	1	1	1	1	1	1	1	1	1	1	1	1	1	1	1	1	1	1	1	1	1
Nitrogen oxides	1	1	1	1	1	1	1	1	1	1	1	1	1	1	1	1	1	1	1	1	1	1	1	1	1	1	1	1	1	1	1	1	1	1	1	1
PAH, polycyclic aromatic hydrocarbons	1	1	1	1	1	1	1	1	1	1	1	1	1	1	1	1	1	1	1	1	1	1	1	1	1	1	1	1	1	1	1	1	1	1	1	1
Particulate Matter, < 2.5 um	1	1	1	1	1	1	1	1	1	1	1	1	1	1	1	1	1	1	1	1	1	1	1	1	1	1	1	1	1	1	1	1	1	1	1	1
Water	1	1	1	1	1	1	1	1	1	1	1	1	1	1	1	1	1	1	1	1	1	1	1	1	1	1	1	1	1	1	1	1	1	1	1	1
Water, cooling, unspecified natural origin	1	1	1	1	1	1	1	1	1	1	1	1	1	1	1	1	1	1	1	1	1	1	1	1	1	1	1	1	1	1	1	1	1	1	1	1
Water, unspecified natural origin	1	1	1	1	1	1	1	1	1	1	1	1	1	1	1	1	1	1	1	1	1	1	1	1	1	1	1	1	1	1	1	1	1	1	1	1
blast furnace gas, Recycled Content cut-off	1	1	1	1	0.988393	0.970147	1	0.989365	0.986394	0.973528	0.960302	0.960302	0.989559	0.885119	0.883587	0.883587	0.883587	0.883587	1	1	1	1	1	1	1	1	1	1	1	1	1	1	1	1	1	1
carbon dioxide, captured at steel production plant, with underground storage, post, 200 km	1	11.8914	15.1393	21.692	22.151	34.6964	0	33.263	35.6327	37.8797	51.3996	59.8926	2.18258	31.3155	31.1363	55.9065	91.5135	93.0742	0	0	0	0	0	0	0	0	0	0	0	0	0	0	0	0	0	0
market for aluminium, wrought alloy	1	1	1	1	1	1	1	1	1	1	1	1	1	1	1	1	1	1	1	1	1	1	1	1	1	1	1	1	1	1	1	1	1	1	1	1
market for argon, liquid	1	1	1	1	1	1	1	1	1	1	1	1	1	1	1	1	1	1	1	1	1	1	1	1	1	1	1	1	1	1	1	1	1	1	1	1
market for basic oxygen furnace dust	1	1	1	1	1	1	1	1	1	1	1	1	1	1	1	1	1	1	1	1	1	1	1	1	1	1	1	1	1	1	1	1	1	1	1	1
market for basic oxygen furnace secondary metallurgy slag	1	1	1	1	1	1	1	1	1	1	1	1	1	1	1	1	1	1	1	1	1	1	1	1	1	1	1	1	1	1	1	1	1	1	1	1
market for basic oxygen furnace slag	1	1	1	1	1	1	1	1	1	1	1	1	1	1	1	1	1	1	1	1	1	1	1	1	1	1	1	1	1	1	1	1	1	1	1	1
market for basic oxygen furnace sludge	1	1	1	1	1	1	1	1	1	1	1	1	1	1	1	1	1	1	1	1	1	1	1	1	1	1	1	1	1	1	1	1	1	1	1	1
market for basic oxygen furnace waste	1	1	1	1	1	1	1	1	1	1	1	1	1	1	1	1	1	1	1	1	1	1	1	1	1	1	1	1	1	1	1	1	1	1	1	1
market for blast oxygen furnace converter	1	1	1	1	1	1	1	1	1	1	1	1	1	1	1	1	1	1	1	1	1	1	1	1	1	1	1	1	1	1	1	1	1	1	1	1
market for calcium carbide, technical grade	1	1	1	1	1	1	1	1	1	1	1	1	1	1	1	1	1	1	1	1	1	1	1	1	1	1	1	1	1	1	1	1	1	1	1	1
market for coke	1	1	1	1	0.988393	0.970147	1	0.989365	0.986394	0.973528	0.960302	0.960302	0.989559	0.885119	0.883587	0.883587	0.883587	0.883587	1	1	1	1	1	1	1	1	1	1	1	1	1	1	1	1	1	1
market for compressed air, 600 kPa gauge	1	1	1	1	1	1	1	1	1	1	1	1	1	1	1	1	1	1	1	1	1	1	1	1	1	1	1	1	1	1	1	1	1	1	1	1
market for copper, cathode	1	1	1	1	1	1	1	1	1	1	1	1	1	1	1	1	1	1	1	1	1	1	1	1	1	1	1	1	1	1	1	1	1	1	1	1
market for diesel	1	1	1	1	0.988393	0.970147	1	0.989365	0.986394	0.973528	0.960302	0.960302	0.989559	0.885119	0.883587	0.883587	0.883587	0.883587	1	1	1	1	1	1	1	1	1	1	1	1	1	1	1	1	1	1
market for dolomite	1	1	1	1	1	1	1	1	1	1	1	1	1	1	1	1	1	1	1	1	1	1	1	1	1	1	1	1	1	1	1	1	1	1	1	1
market for electricity, medium voltage	1	1	1	1	0.988393	0.970147	1	0.989365	0.986394	0.973528	0.960302	0.960302	0.989559	0.885119	0.883587	0.883587	0.883587	0.883587	1	1	1	1	1	1	1	1	1	1	1	1	1	1	1	1	1	1
market for electrode, negative, Ni	1	1	1	1	1	1	1	1	1	1	1	1	1	1	1	1	1	1	1	1	1	1	1	1	1	1	1	1	1	1	1	1	1	1	1	1
market for ferromanganese, high-coal, 74.5% Mn	1	1	1	1	0.988393	0.970147	1	0.989365	0.986394	0.973528	0.960302	0.960302	0.989559	0.885119	0.883587	0.883587	0.883587	0.883587	1	1	1	1	1	1	1	1	1	1	1	1	1	1	1	1	1	1
market for ferronickel	1	1	1	1	1	1	1	1	1	1	1	1	1	1	1	1	1	1	1	1	1	1	1	1	1	1	1	1	1	1	1	1	1	1	1	1
market for ferrosilicon	1	1	1	1	1	1	1	1	1	1	1	1	1	1	1	1	1	1	1	1	1	1	1	1	1	1	1	1	1	1	1	1	1	1	1	1
market for inert waste, for final disposal	1	1	1	1	1	1	1	1	1	1	1	1	1	1	1	1	1	1	1	1	1	1	1	1	1	1	1	1	1	1	1	1	1	1	1	1
market for iron ore concentrate	1	1	1	1	1	1	1	1	1	1	1	1	1	1	1	1	1	1	1	1	1	1	1	1	1	1	1	1	1	1	1	1	1	1	1	1
market for iron scrap, sorted, pressed	1	1	1	1	1	1	1	1	1	1	1	1	1	1	1	1	1	1	1	1	1	1	1	1	1	1	1	1	1	1	1	1	1	1	1	1
market for lime	1	1	1	1	1	1	1	1	1	1	1	1	1	1	1	1	1	1	1	1	1	1	1	1	1	1	1	1	1	1	1	1	1	1	1	1
market for liquefied petroleum gas	1	1	1	1	0.988393	0.970147	1	0.989365	0.986394	0.973528	0.960302	0.960302	0.989559	0.885119	0.883587	0.883587	0.883587	0.883587	1	1	1	1	1	1	1	1	1	1	1	1	1	1	1	1	1	1
market for manganese	1	1	1	1	1	1	1	1	1	1	1	1	1	1	1	1	1	1	1	1	1	1	1	1	1	1	1	1	1	1	1	1	1	1	1	1
market for mill scale	1	1	1	1	1	1	1	1	1	1	1	1	1	1	1	1	1	1	1	1	1	1	1	1	1	1	1	1	1	1	1	1	1	1	1	1
market for molybdenite	1	1	1	1	1	1	1	1	1	1	1	1	1	1	1	1	1	1	1	1	1	1	1	1	1	1	1	1	1	1	1	1	1	1	1	1
market for natural gas, high pressure	1	1	1	1	0.988393	0.970147	1	0.989365	0.986394	0.973528	0.960302	0.960302	0.989559	0.885119	0.883587	0.883587	0.883587	0.883587	1	1	1	1	1	1	1	1	1	1	1	1	1	1	1	1	1	1
market for nickel, class 1	1	1	1	1	1	1	1	1	1	1	1	1	1	1	1	1	1	1	1	1	1	1	1	1	1	1	1	1	1	1	1	1	1	1	1	1
market for nitrogen, liquid	1	1	1	1	1	1	1	1	1	1	1	1	1	1	1	1	1	1	1	1	1	1	1	1	1	1	1	1	1	1	1	1	1	1	1	1
market for oxygen, liquid	1	1	1	1	1	1	1	1	1	1	1	1	1	1	1	1	1	1	1	1	1	1	1	1	1	1	1	1	1	1	1	1	1	1	1	1
market for pig iron	1	1	1	1	1	1	1	1	1	1	1	1	1	1	1	1	1	1	1	1	1	1	1	1	1	1	1	1	1	1	1	1	1	1	1	1
market for propane	1	1	1	1	1	1	1	1	1	1	1	1	1	1	1	1	1	1	1	1	1	1	1	1	1	1	1	1	1	1	1	1	1	1	1	1
market for quicklime, in pieces, loose	1	1	1	1	1	1	1	1	1	1	1	1	1	1	1	1	1	1	1	1	1	1	1	1	1	1	1	1	1	1	1	1	1	1	1	1
market for sponge iron	1	1	1	1	1	1	1	1	1	1	1	1	1	1	1	1	1	1	1	1	1	1	1	1	1	1	1	1	1	1	1	1	1	1	1	1
market for steam, in chemical industry	1	1	1	1	0.988393	0.970147	1	0.989365	0.986394	0.973528	0.960302	0.960302	0.989559	0.885119	0.883587	0.883587	0.883587	0.883587	1	1	1	1	1	1	1	1	1	1	1	1	1	1	1	1	1	1
market for wastewater from pig iron production	1	1	1	1	1	1	1	1	1	1	1	1	1	1	1	1	1	1	1	1	1	1	1	1	1	1	1	1	1	1	1	1	1	1	1	1
market for wastewater, average	1	1	1	1	1	1	1	1	1	1	1	1	1	1	1	1	1	1	1	1	1	1	1	1	1	1	1	1	1	1	1	1	1	1	1	1
market group for electricity, medium voltage	1	1	1	1	0.988393	0.970147	1	0.989365	0.986394	0.973528	0.960302	0.960302	0.989559	0.885119	0.883587	0.883587	0.883587	0.883587	1	1	1	1	1	1	1	1	1	1	1	1	1	1	1	1	1	1
steel production, converter, low-alloyed	1	1	1	1	1	1	1	1	1	1	1	1	1	1	1	1	1	1	1	1	1	1	1	1	1	1	1	1	1	1	1	1	1	1	1	1
preperation for recycling, steel scrap, from fossil infrastructure	1	1	1	1	1	1	1	1	1	1	1	1	1	1	1	1	1	1	1	1	1	1	1	1	1	1	1	1	1	1	1	1	1	1	1	1
treatment of electric arc furnace dust, residual material landfill, pessimistic	1	1	1	1	1	1	1	1	1	1	1	1	1	1	1	1	1	1	1	1	1	1	1	1	1	1	1	1	1	1	1	1	1	1	1	1
treatment of electric arc furnace slag, low-alloyed steel, residual material landfill, pessimistic	1	1	1	1	1	1	1	1	1	1	1	1	1	1	1	1	1	1	1	1	1	1	1	1	1	1	1	1	1	1	1	1	1	1	1	1
treatment of electric arc furnace dust, residual material landfill, optimistic	1	1	1	1	1	1	1	1	1	1	1	1	1	1	1	1	1	1	1	1	1	1	1	1	1	1	1	1	1	1	1	1	1	1	1	1
treatment of electric arc furnace slag, low-alloyed steel, residual material landfill, optimistic	1	1	1	1	1	1	1	1	1	1	1	1	1	1	1	1	1	1	1	1	1	1	1	1	1	1	1	1	1	1	1	1	1	1	1	1
treatment of electric arc furnace slag, reinforcing steel, residual material landfill, pessimistic	1	1	1	1	1	1	1	1	1	1	1	1	1	1	1	1	1	1	1	1	1	1	1	1	1	1	1	1	1	1	1	1	1	1	1	1
treatment of electric arc furnace slag, reinforcing steel, residual material landfill, optimistic	1	1	1	1	1	1	1	1	1	1	1	1	1	1	1	1	1	1	1	1	1	1	1	1	1	1	1	1	1	1	1	1	1	1	1	1
market for hot rolling, steel	1	1	1	1	1	1	1	1	1	1	1	1	1	1	1	1	1	1	1	1	1	1	1	1	1	1	1	1	1	1	1	1	1	1	1	1
steel production, converter, unalloyed	1	1	1	1	1	1	1	1	1	1	1	1	1	1	1	1	1	1	1	1	1	1	1	1	1	1	1	1	1	1	1	1	1	1	1	1

## Sheet: secondary-low-alloyed
name	remind - SSP1-NDC - 2025	remind - SSP1-NDC - 2030	remind - SSP1-NDC - 2035	remind - SSP1-NDC - 2040	remind - SSP1-NDC - 2045	remind - SSP1-NDC - 2050	remind - SSP2-NDC - 2025	remind - SSP2-NDC - 2030	remind - SSP2-NDC - 2035	remind - SSP2-NDC - 2040	remind - SSP2-NDC - 2045	remind - SSP2-NDC - 2050	remind - SSP5-NDC - 2025	remind - SSP5-NDC - 2030	remind - SSP5-NDC - 2035	remind - SSP5-NDC - 2040	remind - SSP5-NDC - 2045	remind - SSP5-NDC - 2050	remind - SSP1-NPi - 2025	remind - SSP1-NPi - 2030	remind - SSP1-NPi - 2035	remind - SSP1-NPi - 2040	remind - SSP1-NPi - 2045	remind - SSP1-NPi - 2050	remind - SSP2-NPi - 2025	remind - SSP2-NPi - 2030	remind - SSP2-NPi - 2035	remind - SSP2-NPi - 2040	remind - SSP2-NPi - 2045	remind - SSP2-NPi - 2050	remind - SSP5-NPi - 2025	remind - SSP5-NPi - 2030	remind - SSP5-NPi - 2035	remind - SSP5-NPi - 2040	remind - SSP5-NPi - 2045	remind - SSP5-NPi - 2050
Antimony ion	1	1	1	1	1	1	1	1	1	1	1	1	1	1	1	1	1	1	1	1	1	1	1	1	1	1	1	1	1	1	1	1	1	1	1	1
Argon-40	1	1	1	1	1	1	1	1	1	1	1	1	1	1	1	1	1	1	1	1	1	1	1	1	1	1	1	1	1	1	1	1	1	1	1	1
Arsenic ion	1	1	1	1	1	1	1	1	1	1	1	1	1	1	1	1	1	1	1	1	1	1	1	1	1	1	1	1	1	1	1	1	1	1	1	1
Benzene	1	1	1	1	1	1	1	1	1	1	1	1	1	1	1	1	1	1	1	1	1	1	1	1	1	1	1	1	1	1	1	1	1	1	1	1
Benzene, hexachloro-	1	1	1	1	1	1	1	1	1	1	1	1	1	1	1	1	1	1	1	1	1	1	1	1	1	1	1	1	1	1	1	1	1	1	1	1
Cadmium II	1	1	1	1	1	1	1	1	1	1	1	1	1	1	1	1	1	1	1	1	1	1	1	1	1	1	1	1	1	1	1	1	1	1	1	1
Carbon dioxide, fossil	1	0.987193	0.983749	0.977241	0.977163	0.964768	1.11761	1.07453	1.07118	1.05773	1.026	1.00788	1.1198	1.07972	1.08076	1.04929	1.00386	1.00292	1.06001	1.05164	1.04232	1.02484	1.00724	1.00244	1.11152	1.11182	1.11219	1.10505	1.09055	1.07582	1.12306	1.12373	1.12445	1.12499	1.12559	1.11421
Carbon dioxide, non-fossil	1	1.40849	1.43491	1.37685	1.20916	0.870845	1.07828	1.69233	1.81511	1.8425	1.64806	1.30743	1.16013	1.62552	1.40324	1.18862	0.927854	0.648476	1.33469	1.3517	1.30426	1.18645	0.963457	0.640663	1.02454	0.94972	0.855198	0.726925	0.534642	0.300453	0.978796	0.809695	0.62697	0.490624	0.337851	0.178063
Carbon monoxide, fossil	1	1	1	1	1	1	1	1	1	1	1	1	1	1	1	1	1	1	1	1	1	1	1	1	1	1	1	1	1	1	1	1	1	1	1	1
Chloride	1	1	1	1	1	1	1	1	1	1	1	1	1	1	1	1	1	1	1	1	1	1	1	1	1	1	1	1	1	1	1	1	1	1	1	1
Chromium III	1	1	1	1	1	1	1	1	1	1	1	1	1	1	1	1	1	1	1	1	1	1	1	1	1	1	1	1	1	1	1	1	1	1	1	1
Chromium VI	1	1	1	1	1	1	1	1	1	1	1	1	1	1	1	1	1	1	1	1	1	1	1	1	1	1	1	1	1	1	1	1	1	1	1	1
Cobalt II	1	1	1	1	1	1	1	1	1	1	1	1	1	1	1	1	1	1	1	1	1	1	1	1	1	1	1	1	1	1	1	1	1	1	1	1
Copper ion	1	1	1	1	1	1	1	1	1	1	1	1	1	1	1	1	1	1	1	1	1	1	1	1	1	1	1	1	1	1	1	1	1	1	1	1
Dioxins, measured as 2,3,7,8-tetrachlorodibenzo-p-dioxin	1	1	1	1	1	1	1	1	1	1	1	1	1	1	1	1	1	1	1	1	1	1	1	1	1	1	1	1	1	1	1	1	1	1	1	1
Hydrocarbons, aromatic	1	1	1	1	1	1	1	1	1	1	1	1	1	1	1	1	1	1	1	1	1	1	1	1	1	1	1	1	1	1	1	1	1	1	1	1
Hydrochloric acid	1	1	1	1	1	1	1	1	1	1	1	1	1	1	1	1	1	1	1	1	1	1	1	1	1	1	1	1	1	1	1	1	1	1	1	1
Hydrogen fluoride	1	1	1	1	1	1	1	1	1	1	1	1	1	1	1	1	1	1	1	1	1	1	1	1	1	1	1	1	1	1	1	1	1	1	1	1
Lead II	1	1	1	1	1	1	1	1	1	1	1	1	1	1	1	1	1	1	1	1	1	1	1	1	1	1	1	1	1	1	1	1	1	1	1	1
Manganese II	1	1	1	1	1	1	1	1	1	1	1	1	1	1	1	1	1	1	1	1	1	1	1	1	1	1	1	1	1	1	1	1	1	1	1	1
Mercury II	1	1	1	1	1	1	1	1	1	1	1	1	1	1	1	1	1	1	1	1	1	1	1	1	1	1	1	1	1	1	1	1	1	1	1	1
Methane, fossil	1	1	1	1	1	1	1	1	1	1	1	1	1	1	1	1	1	1	1	1	1	1	1	1	1	1	1	1	1	1	1	1	1	1	1	1
NMVOC, non-methane volatile organic compounds	1	1	1	1	1	1	1	1	1	1	1	1	1	1	1	1	1	1	1	1	1	1	1	1	1	1	1	1	1	1	1	1	1	1	1	1
Nickel II	1	1	1	1	1	1	1	1	1	1	1	1	1	1	1	1	1	1	1	1	1	1	1	1	1	1	1	1	1	1	1	1	1	1	1	1
Nitrogen oxides	1	1	1	1	1	1	1	1	1	1	1	1	1	1	1	1	1	1	1	1	1	1	1	1	1	1	1	1	1	1	1	1	1	1	1	1
PAH, polycyclic aromatic hydrocarbons	1	1	1	1	1	1	1	1	1	1	1	1	1	1	1	1	1	1	1	1	1	1	1	1	1	1	1	1	1	1	1	1	1	1	1	1
Particulate Matter, < 2.5 um	1	1	1	1	1	1	1	1	1	1	1	1	1	1	1	1	1	1	1	1	1	1	1	1	1	1	1	1	1	1	1	1	1	1	1	1
Particulate Matter, > 10 um	1	1	1	1	1	1	1	1	1	1	1	1	1	1	1	1	1	1	1	1	1	1	1	1	1	1	1	1	1	1	1	1	1	1	1	1
Particulate Matter, > 2.5 um and < 10um	1	1	1	1	1	1	1	1	1	1	1	1	1	1	1	1	1	1	1	1	1	1	1	1	1	1	1	1	1	1	1	1	1	1	1	1
Phosphorus	1	1	1	1	1	1	1	1	1	1	1	1	1	1	1	1	1	1	1	1	1	1	1	1	1	1	1	1	1	1	1	1	1	1	1	1
Polychlorinated biphenyls	1	1	1	1	1	1	1	1	1	1	1	1	1	1	1	1	1	1	1	1	1	1	1	1	1	1	1	1	1	1	1	1	1	1	1	1
Selenium IV	1	1	1	1	1	1	1	1	1	1	1	1	1	1	1	1	1	1	1	1	1	1	1	1	1	1	1	1	1	1	1	1	1	1	1	1
Sulfate	1	1	1	1	1	1	1	1	1	1	1	1	1	1	1	1	1	1	1	1	1	1	1	1	1	1	1	1	1	1	1	1	1	1	1	1
Sulfur dioxide	1	1	1	1	1	1	1	1	1	1	1	1	1	1	1	1	1	1	1	1	1	1	1	1	1	1	1	1	1	1	1	1	1	1	1	1
Tellurium	1	1	1	1	1	1	1	1	1	1	1	1	1	1	1	1	1	1	1	1	1	1	1	1	1	1	1	1	1	1	1	1	1	1	1	1
Tin ion	1	1	1	1	1	1	1	1	1	1	1	1	1	1	1	1	1	1	1	1	1	1	1	1	1	1	1	1	1	1	1	1	1	1	1	1
Titanium ion	1	1	1	1	1	1	1	1	1	1	1	1	1	1	1	1	1	1	1	1	1	1	1	1	1	1	1	1	1	1	1	1	1	1	1	1
Vanadium V	1	1	1	1	1	1	1	1	1	1	1	1	1	1	1	1	1	1	1	1	1	1	1	1	1	1	1	1	1	1	1	1	1	1	1	1
Water	1	1	1	1	1	1	1	1	1	1	1	1	1	1	1	1	1	1	1	1	1	1	1	1	1	1	1	1	1	1	1	1	1	1	1	1
Water, cooling, unspecified natural origin	1	1	1	1	1	1	1	1	1	1	1	1	1	1	1	1	1	1	1	1	1	1	1	1	1	1	1	1	1	1	1	1	1	1	1	1
Water, unspecified natural origin	1	1	1	1	1	1	1	1	1	1	1	1	1	1	1	1	1	1	1	1	1	1	1	1	1	1	1	1	1	1	1	1	1	1	1	1
Zinc II	1	1	1	1	1	1	1	1	1	1	1	1	1	1	1	1	1	1	1	1	1	1	1	1	1	1	1	1	1	1	1	1	1	1	1	1
carbon dioxide, captured at steel production plant, with underground storage, post, 200 km	1	11.8914	15.1393	21.692	22.4111	35.7641	0	37.4592	40.2487	42.9431	58.1758	67.1536	2.47325	39.6732	39.5145	70.9501	116.138	118.119	0	0	0	0	0	0	0	0	0	0	0	0	0	0	0	0	0	0
electric arc furnace slag, for recovery, Recycled Content cut-off	1	1	1	1	1	1	1	1	1	1	1	1	1	1	1	1	1	1	1	1	1	1	1	1	1	1	1	1	1	1	1	1	1	1	1	1
market for aluminium, cast alloy	1	1	1	1	1	1	1	1	1	1	1	1	1	1	1	1	1	1	1	1	1	1	1	1	1	1	1	1	1	1	1	1	1	1	1	1
market for aluminium, primary, ingot	1	1	1	1	1	1	1	1	1	1	1	1	1	1	1	1	1	1	1	1	1	1	1	1	1	1	1	1	1	1	1	1	1	1	1	1
market for aluminium, wrought alloy	1	1	1	1	1	1	1	1	1	1	1	1	1	1	1	1	1	1	1	1	1	1	1	1	1	1	1	1	1	1	1	1	1	1	1	1
market for anode, for metal electrolysis	1	1	1	1	1	1	1	1	1	1	1	1	1	1	1	1	1	1	1	1	1	1	1	1	1	1	1	1	1	1	1	1	1	1	1	1
market for argon, liquid	1	1	1	1	1	1	1	1	1	1	1	1	1	1	1	1	1	1	1	1	1	1	1	1	1	1	1	1	1	1	1	1	1	1	1	1
market for calcium carbide, technical grade	1	1	1	1	1	1	1	1	1	1	1	1	1	1	1	1	1	1	1	1	1	1	1	1	1	1	1	1	1	1	1	1	1	1	1	1
market for cast iron	1	1	1	1	1	1	1	1	1	1	1	1	1	1	1	1	1	1	1	1	1	1	1	1	1	1	1	1	1	1	1	1	1	1	1	1
market for chemical, inorganic	1	1	1	1	1	1	1	1	1	1	1	1	1	1	1	1	1	1	1	1	1	1	1	1	1	1	1	1	1	1	1	1	1	1	1	1
market for coke	1	1	1	1	1	1	1.11631	1.11417	1.11417	1.10366	1.0869	1.07672	1.12135	1.12135	1.12135	1.12135	1.12135	1.12135	1.06	1.05174	1.04228	1.02443	1.00603	1	1.11004	1.11004	1.11004	1.10243	1.08725	1.07168	1.12135	1.12135	1.12135	1.12135	1.12135	1.1094
market for diesel, burned in building machine	1	1	1	1	1	1	1.11631	1.11417	1.11417	1.10366	1.0869	1.07672	1.12135	1.12135	1.12135	1.12135	1.12135	1.12135	1.06	1.05174	1.04228	1.02443	1.00603	1	1.11004	1.11004	1.11004	1.10243	1.08725	1.07168	1.12135	1.12135	1.12135	1.12135	1.12135	1.1094
market for dolomite	1	1	1	1	1	1	1	1	1	1	1	1	1	1	1	1	1	1	1	1	1	1	1	1	1	1	1	1	1	1	1	1	1	1	1	1
market for electric arc furnace converter	1	1	1	1	1	1	1	1	1	1	1	1	1	1	1	1	1	1	1	1	1	1	1	1	1	1	1	1	1	1	1	1	1	1	1	1
market for electric arc furnace dust	1	1	1	1	1	1	1	1	1	1	1	1	1	1	1	1	1	1	1	1	1	1	1	1	1	1	1	1	1	1	1	1	1	1	1	1
market for electric arc furnace secondary metallurgy slag	1	1	1	1	1	1	1	1	1	1	1	1	1	1	1	1	1	1	1	1	1	1	1	1	1	1	1	1	1	1	1	1	1	1	1	1
market for electric arc furnace slag	1	1	1	1	1	1	1	1	1	1	1	1	1	1	1	1	1	1	1	1	1	1	1	1	1	1	1	1	1	1	1	1	1	1	1	1
market for electricity, high voltage	1	1	1	1	1	1	1.11631	1.11417	1.11417	1.10366	1.0869	1.07672	1.12135	1.12135	1.12135	1.12135	1.12135	1.12135	1.06	1.05174	1.04228	1.02443	1.00603	1	1.11004	1.11004	1.11004	1.10243	1.08725	1.07168	1.12135	1.12135	1.12135	1.12135	1.12135	1.1094
market for electricity, low voltage	1	1	1	1	1	1	1.11631	1.11417	1.11417	1.10366	1.0869	1.07672	1.12135	1.12135	1.12135	1.12135	1.12135	1.12135	1.06	1.05174	1.04228	1.02443	1.00603	1	1.11004	1.11004	1.11004	1.10243	1.08725	1.07168	1.12135	1.12135	1.12135	1.12135	1.12135	1.1094
market for electricity, medium voltage	1	1	1	1	1	1	1.11631	1.11417	1.11417	1.10366	1.0869	1.07672	1.12135	1.12135	1.12135	1.12135	1.12135	1.12135	1.06	1.05174	1.04228	1.02443	1.00603	1	1.11004	1.11004	1.11004	1.10243	1.08725	1.07168	1.12135	1.12135	1.12135	1.12135	1.12135	1.1094
market for electrode, negative, Ni	1	1	1	1	1	1	1	1	1	1	1	1	1	1	1	1	1	1	1	1	1	1	1	1	1	1	1	1	1	1	1	1	1	1	1	1
market for ethylene glycol	1	1	1	1	1	1	1	1	1	1	1	1	1	1	1	1	1	1	1	1	1	1	1	1	1	1	1	1	1	1	1	1	1	1	1	1
market for ferrochromium, high-carbon, 68% Cr	1	1	1	1	1	1	1	1	1	1	1	1	1	1	1	1	1	1	1	1	1	1	1	1	1	1	1	1	1	1	1	1	1	1	1	1
market for ferromanganese, high-coal, 74.5% Mn	1	1	1	1	1	1	1.11631	1.11417	1.11417	1.10366	1.0869	1.07672	1.12135	1.12135	1.12135	1.12135	1.12135	1.12135	1.06	1.05174	1.04228	1.02443	1.00603	1	1.11004	1.11004	1.11004	1.10243	1.08725	1.07168	1.12135	1.12135	1.12135	1.12135	1.12135	1.1094
market for ferrosilicon	1	1	1	1	1	1	1	1	1	1	1	1	1	1	1	1	1	1	1	1	1	1	1	1	1	1	1	1	1	1	1	1	1	1	1	1
market for fluorspar, 97% purity	1	1	1	1	1	1	1	1	1	1	1	1	1	1	1	1	1	1	1	1	1	1	1	1	1	1	1	1	1	1	1	1	1	1	1	1
market for hard coal	1	1	1	1	1	1	1.11631	1.11417	1.11417	1.10366	1.0869	1.07672	1.12135	1.12135	1.12135	1.12135	1.12135	1.12135	1.06	1.05174	1.04228	1.02443	1.00603	1	1.11004	1.11004	1.11004	1.10243	1.08725	1.07168	1.12135	1.12135	1.12135	1.12135	1.12135	1.1094
market for heat, district or industrial, natural gas	1	1	1	1	1	1	1.11631	1.11417	1.11417	1.10366	1.0869	1.07672	1.12135	1.12135	1.12135	1.12135	1.12135	1.12135	1.06	1.05174	1.04228	1.02443	1.00603	1	1.11004	1.11004	1.11004	1.10243	1.08725	1.07168	1.12135	1.12135	1.12135	1.12135	1.12135	1.1094
market for heat, district or industrial, other than natural gas	1	1	1	1	1	1	1.11631	1.11417	1.11417	1.10366	1.0869	1.07672	1.12135	1.12135	1.12135	1.12135	1.12135	1.12135	1.06	1.05174	1.04228	1.02443	1.00603	1	1.11004	1.11004	1.11004	1.10243	1.08725	1.07168	1.12135	1.12135	1.12135	1.12135	1.12135	1.1094
market for heavy fuel oil	1	1	1	1	1	1	1.11631	1.11417	1.11417	1.10366	1.0869	1.07672	1.12135	1.12135	1.12135	1.12135	1.12135	1.12135	1.06	1.05174	1.04228	1.02443	1.00603	1	1.11004	1.11004	1.11004	1.10243	1.08725	1.07168	1.12135	1.12135	1.12135	1.12135	1.12135	1.1094
market for hydrochloric acid, without water, in 30% solution state	1	1	1	1	1	1	1	1	1	1	1	1	1	1	1	1	1	1	1	1	1	1	1	1	1	1	1	1	1	1	1	1	1	1	1	1
market for inert waste	1	1	1	1	1	1	1	1	1	1	1	1	1	1	1	1	1	1	1	1	1	1	1	1	1	1	1	1	1	1	1	1	1	1	1	1
market for inert waste, for final disposal	1	1	1	1	1	1	1	1	1	1	1	1	1	1	1	1	1	1	1	1	1	1	1	1	1	1	1	1	1	1	1	1	1	1	1	1
market for iron scrap, sorted, pressed	1	1	1	1	1	1	1	1	1	1	1	1	1	1	1	1	1	1	1	1	1	1	1	1	1	1	1	1	1	1	1	1	1	1	1	1
market for iron scrap, unsorted	1	1	1	1	1	1	1	1	1	1	1	1	1	1	1	1	1	1	1	1	1	1	1	1	1	1	1	1	1	1	1	1	1	1	1	1
market for lime	1	1	1	1	1	1	1	1	1	1	1	1	1	1	1	1	1	1	1	1	1	1	1	1	1	1	1	1	1	1	1	1	1	1	1	1
market for liquefied petroleum gas	1	1	1	1	1	1	1.11631	1.11417	1.11417	1.10366	1.0869	1.07672	1.12135	1.12135	1.12135	1.12135	1.12135	1.12135	1.06	1.05174	1.04228	1.02443	1.00603	1	1.11004	1.11004	1.11004	1.10243	1.08725	1.07168	1.12135	1.12135	1.12135	1.12135	1.12135	1.1094
market for lubricating oil	1	1	1	1	1	1	1.11631	1.11417	1.11417	1.10366	1.0869	1.07672	1.12135	1.12135	1.12135	1.12135	1.12135	1.12135	1.06	1.05174	1.04228	1.02443	1.00603	1	1.11004	1.11004	1.11004	1.10243	1.08725	1.07168	1.12135	1.12135	1.12135	1.12135	1.12135	1.1094
market for molybdenum trioxide	1	1	1	1	1	1	1	1	1	1	1	1	1	1	1	1	1	1	1	1	1	1	1	1	1	1	1	1	1	1	1	1	1	1	1	1
market for natural gas, high pressure	1	1	1	1	1	1	1.11631	1.11417	1.11417	1.10366	1.0869	1.07672	1.12135	1.12135	1.12135	1.12135	1.12135	1.12135	1.06	1.05174	1.04228	1.02443	1.00603	1	1.11004	1.11004	1.11004	1.10243	1.08725	1.07168	1.12135	1.12135	1.12135	1.12135	1.12135	1.1094
market for nickel, class 1	1	1	1	1	1	1	1	1	1	1	1	1	1	1	1	1	1	1	1	1	1	1	1	1	1	1	1	1	1	1	1	1	1	1	1	1
market for nitrogen, liquid	1	1	1	1	1	1	1	1	1	1	1	1	1	1	1	1	1	1	1	1	1	1	1	1	1	1	1	1	1	1	1	1	1	1	1	1
market for oxygen, liquid	1	1	1	1	1	1	1	1	1	1	1	1	1	1	1	1	1	1	1	1	1	1	1	1	1	1	1	1	1	1	1	1	1	1	1	1
market for pig iron	1	1	1	1	1	1	1	1	1	1	1	1	1	1	1	1	1	1	1	1	1	1	1	1	1	1	1	1	1	1	1	1	1	1	1	1
market for propane, burned in building machine	1	1	1	1	1	1	1	1	1	1	1	1	1	1	1	1	1	1	1	1	1	1	1	1	1	1	1	1	1	1	1	1	1	1	1	1
market for quicklime, in pieces, loose	1	1	1	1	1	1	1	1	1	1	1	1	1	1	1	1	1	1	1	1	1	1	1	1	1	1	1	1	1	1	1	1	1	1	1	1
market for refractory, basic, packed	1	1	1	1	1	1	1	1	1	1	1	1	1	1	1	1	1	1	1	1	1	1	1	1	1	1	1	1	1	1	1	1	1	1	1	1
market for silica sand	1	1	1	1	1	1	1	1	1	1	1	1	1	1	1	1	1	1	1	1	1	1	1	1	1	1	1	1	1	1	1	1	1	1	1	1
market for spent solvent mixture	1	1	1	1	1	1	1	1	1	1	1	1	1	1	1	1	1	1	1	1	1	1	1	1	1	1	1	1	1	1	1	1	1	1	1	1
market for sponge iron	1	1	1	1	1	1	1	1	1	1	1	1	1	1	1	1	1	1	1	1	1	1	1	1	1	1	1	1	1	1	1	1	1	1	1	1
market for sulfur dioxide, liquid	1	1	1	1	1	1	1	1	1	1	1	1	1	1	1	1	1	1	1	1	1	1	1	1	1	1	1	1	1	1	1	1	1	1	1	1
market for sulfuric acid	1	1	1	1	1	1	1	1	1	1	1	1	1	1	1	1	1	1	1	1	1	1	1	1	1	1	1	1	1	1	1	1	1	1	1	1
market for wastewater, average	1	1	1	1	1	1	1	1	1	1	1	1	1	1	1	1	1	1	1	1	1	1	1	1	1	1	1	1	1	1	1	1	1	1	1	1
market group for electricity, high voltage	1	1	1	1	1	1	1.11631	1.11417	1.11417	1.10366	1.0869	1.07672	1.12135	1.12135	1.12135	1.12135	1.12135	1.12135	1.06	1.05174	1.04228	1.02443	1.00603	1	1.11004	1.11004	1.11004	1.10243	1.08725	1.07168	1.12135	1.12135	1.12135	1.12135	1.12135	1.1094
market group for electricity, low voltage	1	1	1	1	1	1	1.11631	1.11417	1.11417	1.10366	1.0869	1.07672	1.12135	1.12135	1.12135	1.12135	1.12135	1.12135	1.06	1.05174	1.04228	1.02443	1.00603	1	1.11004	1.11004	1.11004	1.10243	1.08725	1.07168	1.12135	1.12135	1.12135	1.12135	1.12135	1.1094
market group for electricity, medium voltage	1	1	1	1	1	1	1.11631	1.11417	1.11417	1.10366	1.0869	1.07672	1.12135	1.12135	1.12135	1.12135	1.12135	1.12135	1.06	1.05174	1.04228	1.02443	1.00603	1	1.11004	1.11004	1.11004	1.10243	1.08725	1.07168	1.12135	1.12135	1.12135	1.12135	1.12135	1.1094
steel production, electric, low-alloyed	1	1	1	1	1	1	1	1	1	1	1	1	1	1	1	1	1	1	1	1	1	1	1	1	1	1	1	1	1	1	1	1	1	1	1	1
preperation for recycling, steel scrap, from fossil infrastructure	1	1	1	1	1	1	1	1	1	1	1	1	1	1	1	1	1	1	1	1	1	1	1	1	1	1	1	1	1	1	1	1	1	1	1	1
treatment of electric arc furnace dust, residual material landfill, pessimistic	1	1	1	1	1	1	1	1	1	1	1	1	1	1	1	1	1	1	1	1	1	1	1	1	1	1	1	1	1	1	1	1	1	1	1	1
treatment of electric arc furnace slag, low-alloyed steel, residual material landfill, pessimistic	1	1	1	1	1	1	1	1	1	1	1	1	1	1	1	1	1	1	1	1	1	1	1	1	1	1	1	1	1	1	1	1	1	1	1	1
market for wastewater from pig iron production	1	1	1	1	1	1	1	1	1	1	1	1	1	1	1	1	1	1	1	1	1	1	1	1	1	1	1	1	1	1	1	1	1	1	1	1
treatment of electric arc furnace dust, residual material landfill, optimistic	1	1	1	1	1	1	1	1	1	1	1	1	1	1	1	1	1	1	1	1	1	1	1	1	1	1	1	1	1	1	1	1	1	1	1	1
treatment of electric arc furnace slag, low-alloyed steel, residual material landfill, optimistic	1	1	1	1	1	1	1	1	1	1	1	1	1	1	1	1	1	1	1	1	1	1	1	1	1	1	1	1	1	1	1	1	1	1	1	1
treatment of electric arc furnace slag, reinforcing steel, residual material landfill, pessimistic	1	1	1	1	1	1	1	1	1	1	1	1	1	1	1	1	1	1	1	1	1	1	1	1	1	1	1	1	1	1	1	1	1	1	1	1
treatment of electric arc furnace slag, reinforcing steel, residual material landfill, optimistic	1	1	1	1	1	1	1	1	1	1	1	1	1	1	1	1	1	1	1	1	1	1	1	1	1	1	1	1	1	1	1	1	1	1	1	1
market for hot rolling, steel	1	1	1	1	1	1	1	1	1	1	1	1	1	1	1	1	1	1	1	1	1	1	1	1	1	1	1	1	1	1	1	1	1	1	1	1
steel production, converter, low-alloyed	1	1	1	1	1	1	1	1	1	1	1	1	1	1	1	1	1	1	1	1	1	1	1	1	1	1	1	1	1	1	1	1	1	1	1	1
steel production, converter, unalloyed	1	1	1	1	1	1	1	1	1	1	1	1	1	1	1	1	1	1	1	1	1	1	1	1	1	1	1	1	1	1	1	1	1	1	1	1

## Sheet: secondary-chromium
name	remind - SSP1-NDC - 2025	remind - SSP1-NDC - 2030	remind - SSP1-NDC - 2035	remind - SSP1-NDC - 2040	remind - SSP1-NDC - 2045	remind - SSP1-NDC - 2050	remind - SSP2-NDC - 2025	remind - SSP2-NDC - 2030	remind - SSP2-NDC - 2035	remind - SSP2-NDC - 2040	remind - SSP2-NDC - 2045	remind - SSP2-NDC - 2050	remind - SSP5-NDC - 2025	remind - SSP5-NDC - 2030	remind - SSP5-NDC - 2035	remind - SSP5-NDC - 2040	remind - SSP5-NDC - 2045	remind - SSP5-NDC - 2050	remind - SSP1-NPi - 2025	remind - SSP1-NPi - 2030	remind - SSP1-NPi - 2035	remind - SSP1-NPi - 2040	remind - SSP1-NPi - 2045	remind - SSP1-NPi - 2050	remind - SSP2-NPi - 2025	remind - SSP2-NPi - 2030	remind - SSP2-NPi - 2035	remind - SSP2-NPi - 2040	remind - SSP2-NPi - 2045	remind - SSP2-NPi - 2050	remind - SSP5-NPi - 2025	remind - SSP5-NPi - 2030	remind - SSP5-NPi - 2035	remind - SSP5-NPi - 2040	remind - SSP5-NPi - 2045	remind - SSP5-NPi - 2050
Benzene	1	1	1	1	1	1	1	1	1	1	1	1	1	1	1	1	1	1	1	1	1	1	1	1	1	1	1	1	1	1	1	1	1	1	1	1
Benzene, hexachloro-	1	1	1	1	1	1	1	1	1	1	1	1	1	1	1	1	1	1	1	1	1	1	1	1	1	1	1	1	1	1	1	1	1	1	1	1
Cadmium II	1	1	1	1	1	1	1	1	1	1	1	1	1	1	1	1	1	1	1	1	1	1	1	1	1	1	1	1	1	1	1	1	1	1	1	1
Carbon dioxide, fossil	1	0.987534	0.984089	0.977456	0.977189	0.964302	1.3214	1.27084	1.267	1.25112	1.2132	1.19126	1.32406	1.27686	1.2778	1.23997	1.18542	1.18393	1.25369	1.24383	1.23276	1.21197	1.19089	1.1709	1.31414	1.31439	1.31471	1.30611	1.28874	1.27105	1.32771	1.32828	1.3289	1.32936	1.32987	1.31623
Carbon dioxide, non-fossil	1	1.40849	1.43491	1.37685	1.20916	0.870845	1.27493	2.00097	2.14614	2.17853	1.94863	1.54588	1.37171	1.92198	1.65915	1.40539	1.09707	0.766742	1.5781	1.59822	1.54213	1.40283	1.13917	0.748606	1.21139	1.12293	1.01117	0.859499	0.632147	0.355248	1.1573	0.957364	0.741314	0.580101	0.399466	0.210537
Carbon monoxide, fossil	1	1	1	1	1	1	1	1	1	1	1	1	1	1	1	1	1	1	1	1	1	1	1	1	1	1	1	1	1	1	1	1	1	1	1	1
Chromium III	1	1	1	1	1	1	1	1	1	1	1	1	1	1	1	1	1	1	1	1	1	1	1	1	1	1	1	1	1	1	1	1	1	1	1	1
Copper ion	1	1	1	1	1	1	1	1	1	1	1	1	1	1	1	1	1	1	1	1	1	1	1	1	1	1	1	1	1	1	1	1	1	1	1	1
Dioxins, measured as 2,3,7,8-tetrachlorodibenzo-p-dioxin	1	1	1	1	1	1	1	1	1	1	1	1	1	1	1	1	1	1	1	1	1	1	1	1	1	1	1	1	1	1	1	1	1	1	1	1
Hydrocarbons, aromatic	1	1	1	1	1	1	1	1	1	1	1	1	1	1	1	1	1	1	1	1	1	1	1	1	1	1	1	1	1	1	1	1	1	1	1	1
Hydrochloric acid	1	1	1	1	1	1	1	1	1	1	1	1	1	1	1	1	1	1	1	1	1	1	1	1	1	1	1	1	1	1	1	1	1	1	1	1
Hydrogen fluoride	1	1	1	1	1	1	1	1	1	1	1	1	1	1	1	1	1	1	1	1	1	1	1	1	1	1	1	1	1	1	1	1	1	1	1	1
Lead II	1	1	1	1	1	1	1	1	1	1	1	1	1	1	1	1	1	1	1	1	1	1	1	1	1	1	1	1	1	1	1	1	1	1	1	1
Mercury II	1	1	1	1	1	1	1	1	1	1	1	1	1	1	1	1	1	1	1	1	1	1	1	1	1	1	1	1	1	1	1	1	1	1	1	1
Nickel II	1	1	1	1	1	1	1	1	1	1	1	1	1	1	1	1	1	1	1	1	1	1	1	1	1	1	1	1	1	1	1	1	1	1	1	1
Nitrogen oxides	1	1	1	1	1	1	1	1	1	1	1	1	1	1	1	1	1	1	1	1	1	1	1	1	1	1	1	1	1	1	1	1	1	1	1	1
PAH, polycyclic aromatic hydrocarbons	1	1	1	1	1	1	1	1	1	1	1	1	1	1	1	1	1	1	1	1	1	1	1	1	1	1	1	1	1	1	1	1	1	1	1	1
Particulate Matter, < 2.5 um	1	1	1	1	1	1	1	1	1	1	1	1	1	1	1	1	1	1	1	1	1	1	1	1	1	1	1	1	1	1	1	1	1	1	1	1
Particulate Matter, > 10 um	1	1	1	1	1	1	1	1	1	1	1	1	1	1	1	1	1	1	1	1	1	1	1	1	1	1	1	1	1	1	1	1	1	1	1	1
Particulate Matter, > 2.5 um and < 10um	1	1	1	1	1	1	1	1	1	1	1	1	1	1	1	1	1	1	1	1	1	1	1	1	1	1	1	1	1	1	1	1	1	1	1	1
Polychlorinated biphenyls	1	1	1	1	1	1	1	1	1	1	1	1	1	1	1	1	1	1	1	1	1	1	1	1	1	1	1	1	1	1	1	1	1	1	1	1
Sulfur dioxide	1	1	1	1	1	1	1	1	1	1	1	1	1	1	1	1	1	1	1	1	1	1	1	1	1	1	1	1	1	1	1	1	1	1	1	1
Water	1	1	1	1	1	1	1	1	1	1	1	1	1	1	1	1	1	1	1	1	1	1	1	1	1	1	1	1	1	1	1	1	1	1	1	1
Water, cooling, unspecified natural origin	1	1	1	1	1	1	1	1	1	1	1	1	1	1	1	1	1	1	1	1	1	1	1	1	1	1	1	1	1	1	1	1	1	1	1	1
Zinc II	1	1	1	1	1	1	1	1	1	1	1	1	1	1	1	1	1	1	1	1	1	1	1	1	1	1	1	1	1	1	1	1	1	1	1	1
carbon dioxide, captured at steel production plant, with underground storage, post, 200 km	1	11.8914	15.1393	21.692	22.4111	35.7641	0	44.2909	47.589	50.7749	68.7857	79.4007	2.92431	46.9087	46.721	83.8897	137.319	139.661	0	0	0	0	0	0	0	0	0	0	0	0	0	0	0	0	0	0
market for anode, for metal electrolysis	1	1	1	1	1	1	1	1	1	1	1	1	1	1	1	1	1	1	1	1	1	1	1	1	1	1	1	1	1	1	1	1	1	1	1	1
market for argon, liquid	1	1	1	1	1	1	1	1	1	1	1	1	1	1	1	1	1	1	1	1	1	1	1	1	1	1	1	1	1	1	1	1	1	1	1	1
market for electric arc furnace converter	1	1	1	1	1	1	1	1	1	1	1	1	1	1	1	1	1	1	1	1	1	1	1	1	1	1	1	1	1	1	1	1	1	1	1	1
market for electric arc furnace dust	1	1	1	1	1	1	1	1	1	1	1	1	1	1	1	1	1	1	1	1	1	1	1	1	1	1	1	1	1	1	1	1	1	1	1	1
market for electric arc furnace secondary metallurgy slag	1	1	1	1	1	1	1	1	1	1	1	1	1	1	1	1	1	1	1	1	1	1	1	1	1	1	1	1	1	1	1	1	1	1	1	1
market for electric arc furnace slag	1	1	1	1	1	1	1	1	1	1	1	1	1	1	1	1	1	1	1	1	1	1	1	1	1	1	1	1	1	1	1	1	1	1	1	1
market for electricity, medium voltage	1	1	1	1	1	1	1.3199	1.31737	1.31737	1.30494	1.28513	1.27309	1.32585	1.32585	1.32585	1.32585	1.32585	1.32585	1.25332	1.24355	1.23236	1.21126	1.18951	1.16849	1.31249	1.31249	1.31249	1.30349	1.28554	1.26713	1.32585	1.32585	1.32585	1.32585	1.32585	1.31172
market for ferrochromium, high-carbon, 68% Cr	1	1	1	1	1	1	1	1	1	1	1	1	1	1	1	1	1	1	1	1	1	1	1	1	1	1	1	1	1	1	1	1	1	1	1	1
market for ferronickel	1	1	1	1	1	1	1	1	1	1	1	1	1	1	1	1	1	1	1	1	1	1	1	1	1	1	1	1	1	1	1	1	1	1	1	1
market for hard coal	1	1	1	1	1	1	1.3199	1.31737	1.31737	1.30494	1.28513	1.27309	1.32585	1.32585	1.32585	1.32585	1.32585	1.32585	1.25332	1.24355	1.23236	1.21126	1.18951	1.16849	1.31249	1.31249	1.31249	1.30349	1.28554	1.26713	1.32585	1.32585	1.32585	1.32585	1.32585	1.31172
market for inert waste, for final disposal	1	1	1	1	1	1	1	1	1	1	1	1	1	1	1	1	1	1	1	1	1	1	1	1	1	1	1	1	1	1	1	1	1	1	1	1
market for iron scrap, sorted, pressed	1	1	1	1	1	1	1	1	1	1	1	1	1	1	1	1	1	1	1	1	1	1	1	1	1	1	1	1	1	1	1	1	1	1	1	1
market for natural gas, high pressure	1	1	1	1	1	1	1.3199	1.31737	1.31737	1.30494	1.28513	1.27309	1.32585	1.32585	1.32585	1.32585	1.32585	1.32585	1.25332	1.24355	1.23236	1.21126	1.18951	1.16849	1.31249	1.31249	1.31249	1.30349	1.28554	1.26713	1.32585	1.32585	1.32585	1.32585	1.32585	1.31172
market for nitrogen, liquid	1	1	1	1	1	1	1	1	1	1	1	1	1	1	1	1	1	1	1	1	1	1	1	1	1	1	1	1	1	1	1	1	1	1	1	1
market for oxygen, liquid	1	1	1	1	1	1	1	1	1	1	1	1	1	1	1	1	1	1	1	1	1	1	1	1	1	1	1	1	1	1	1	1	1	1	1	1
market for quicklime, in pieces, loose	1	1	1	1	1	1	1	1	1	1	1	1	1	1	1	1	1	1	1	1	1	1	1	1	1	1	1	1	1	1	1	1	1	1	1	1
market for refractory, basic, packed	1	1	1	1	1	1	1	1	1	1	1	1	1	1	1	1	1	1	1	1	1	1	1	1	1	1	1	1	1	1	1	1	1	1	1	1
market group for electricity, medium voltage	1	1	1	1	1	1	1.3199	1.31737	1.31737	1.30494	1.28513	1.27309	1.32585	1.32585	1.32585	1.32585	1.32585	1.32585	1.25332	1.24355	1.23236	1.21126	1.18951	1.16849	1.31249	1.31249	1.31249	1.30349	1.28554	1.26713	1.32585	1.32585	1.32585	1.32585	1.32585	1.31172
steel production, electric, chromium steel 18/8	1	1	1	1	1	1	1	1	1	1	1	1	1	1	1	1	1	1	1	1	1	1	1	1	1	1	1	1	1	1	1	1	1	1	1	1
preperation for recycling, steel scrap, from fossil infrastructure	1	1	1	1	1	1	1	1	1	1	1	1	1	1	1	1	1	1	1	1	1	1	1	1	1	1	1	1	1	1	1	1	1	1	1	1
treatment of electric arc furnace dust, residual material landfill, pessimistic	1	1	1	1	1	1	1	1	1	1	1	1	1	1	1	1	1	1	1	1	1	1	1	1	1	1	1	1	1	1	1	1	1	1	1	1
treatment of electric arc furnace slag, low-alloyed steel, residual material landfill, pessimistic	1	1	1	1	1	1	1	1	1	1	1	1	1	1	1	1	1	1	1	1	1	1	1	1	1	1	1	1	1	1	1	1	1	1	1	1
market for wastewater from pig iron production	1	1	1	1	1	1	1	1	1	1	1	1	1	1	1	1	1	1	1	1	1	1	1	1	1	1	1	1	1	1	1	1	1	1	1	1
treatment of electric arc furnace dust, residual material landfill, optimistic	1	1	1	1	1	1	1	1	1	1	1	1	1	1	1	1	1	1	1	1	1	1	1	1	1	1	1	1	1	1	1	1	1	1	1	1
treatment of electric arc furnace slag, low-alloyed steel, residual material landfill, optimistic	1	1	1	1	1	1	1	1	1	1	1	1	1	1	1	1	1	1	1	1	1	1	1	1	1	1	1	1	1	1	1	1	1	1	1	1
treatment of electric arc furnace slag, reinforcing steel, residual material landfill, pessimistic	1	1	1	1	1	1	1	1	1	1	1	1	1	1	1	1	1	1	1	1	1	1	1	1	1	1	1	1	1	1	1	1	1	1	1	1
treatment of electric arc furnace slag, reinforcing steel, residual material landfill, optimistic	1	1	1	1	1	1	1	1	1	1	1	1	1	1	1	1	1	1	1	1	1	1	1	1	1	1	1	1	1	1	1	1	1	1	1	1
market for hot rolling, steel	1	1	1	1	1	1	1	1	1	1	1	1	1	1	1	1	1	1	1	1	1	1	1	1	1	1	1	1	1	1	1	1	1	1	1	1
steel production, converter, low-alloyed	1	1	1	1	1	1	1	1	1	1	1	1	1	1	1	1	1	1	1	1	1	1	1	1	1	1	1	1	1	1	1	1	1	1	1	1
steel production, converter, unalloyed	1	1	1	1	1	1	1	1	1	1	1	1	1	1	1	1	1	1	1	1	1	1	1	1	1	1	1	1	1	1	1	1	1	1	1	1

## Sheet: secondary-reinforcing
name	remind - SSP1-NDC - 2025	remind - SSP1-NDC - 2030	remind - SSP1-NDC - 2035	remind - SSP1-NDC - 2040	remind - SSP1-NDC - 2045	remind - SSP1-NDC - 2050	remind - SSP2-NDC - 2025	remind - SSP2-NDC - 2030	remind - SSP2-NDC - 2035	remind - SSP2-NDC - 2040	remind - SSP2-NDC - 2045	remind - SSP2-NDC - 2050	remind - SSP5-NDC - 2025	remind - SSP5-NDC - 2030	remind - SSP5-NDC - 2035	remind - SSP5-NDC - 2040	remind - SSP5-NDC - 2045	remind - SSP5-NDC - 2050	remind - SSP1-NPi - 2025	remind - SSP1-NPi - 2030	remind - SSP1-NPi - 2035	remind - SSP1-NPi - 2040	remind - SSP1-NPi - 2045	remind - SSP1-NPi - 2050	remind - SSP2-NPi - 2025	remind - SSP2-NPi - 2030	remind - SSP2-NPi - 2035	remind - SSP2-NPi - 2040	remind - SSP2-NPi - 2045	remind - SSP2-NPi - 2050	remind - SSP5-NPi - 2025	remind - SSP5-NPi - 2030	remind - SSP5-NPi - 2035	remind - SSP5-NPi - 2040	remind - SSP5-NPi - 2045	remind - SSP5-NPi - 2050
Antimony ion	1	1	1	1	1	1	1	1	1	1	1	1	1	1	1	1	1	1	1	1	1	1	1	1	1	1	1	1	1	1	1	1	1	1	1	1
Argon-40	1	1	1	1	1	1	1	1	1	1	1	1	1	1	1	1	1	1	1	1	1	1	1	1	1	1	1	1	1	1	1	1	1	1	1	1
Arsenic ion	1	1	1	1	1	1	1	1	1	1	1	1	1	1	1	1	1	1	1	1	1	1	1	1	1	1	1	1	1	1	1	1	1	1	1	1
Benzene	1	1	1	1	1	1	1	1	1	1	1	1	1	1	1	1	1	1	1	1	1	1	1	1	1	1	1	1	1	1	1	1	1	1	1	1
Benzene, hexachloro-	1	1	1	1	1	1	1	1	1	1	1	1	1	1	1	1	1	1	1	1	1	1	1	1	1	1	1	1	1	1	1	1	1	1	1	1
Cadmium II	1	1	1	1	1	1	1	1	1	1	1	1	1	1	1	1	1	1	1	1	1	1	1	1	1	1	1	1	1	1	1	1	1	1	1	1
Carbon dioxide, fossil	1	0.987193	0.983749	0.977241	0.977163	0.964768	1.11761	1.07453	1.07118	1.05773	1.026	1.00788	1.1198	1.07972	1.08076	1.04929	1.00386	1.00292	1.06001	1.05164	1.04232	1.02484	1.00724	1.00244	1.11152	1.11182	1.11219	1.10505	1.09055	1.07582	1.12306	1.12373	1.12445	1.12499	1.12559	1.11421
Carbon dioxide, non-fossil	1	1.40849	1.43491	1.37685	1.20916	0.870845	1.07828	1.69233	1.81511	1.8425	1.64806	1.30743	1.16013	1.62552	1.40324	1.18862	0.927854	0.648476	1.33469	1.3517	1.30426	1.18645	0.963457	0.640663	1.02454	0.94972	0.855198	0.726925	0.534642	0.300453	0.978796	0.809695	0.62697	0.490624	0.337851	0.178063
Carbon monoxide, fossil	1	1	1	1	1	1	1	1	1	1	1	1	1	1	1	1	1	1	1	1	1	1	1	1	1	1	1	1	1	1	1	1	1	1	1	1
Chloride	1	1	1	1	1	1	1	1	1	1	1	1	1	1	1	1	1	1	1	1	1	1	1	1	1	1	1	1	1	1	1	1	1	1	1	1
Chromium III	1	1	1	1	1	1	1	1	1	1	1	1	1	1	1	1	1	1	1	1	1	1	1	1	1	1	1	1	1	1	1	1	1	1	1	1
Chromium VI	1	1	1	1	1	1	1	1	1	1	1	1	1	1	1	1	1	1	1	1	1	1	1	1	1	1	1	1	1	1	1	1	1	1	1	1
Cobalt II	1	1	1	1	1	1	1	1	1	1	1	1	1	1	1	1	1	1	1	1	1	1	1	1	1	1	1	1	1	1	1	1	1	1	1	1
Copper ion	1	1	1	1	1	1	1	1	1	1	1	1	1	1	1	1	1	1	1	1	1	1	1	1	1	1	1	1	1	1	1	1	1	1	1	1
Dioxins, measured as 2,3,7,8-tetrachlorodibenzo-p-dioxin	1	1	1	1	1	1	1	1	1	1	1	1	1	1	1	1	1	1	1	1	1	1	1	1	1	1	1	1	1	1	1	1	1	1	1	1
Hydrocarbons, aromatic	1	1	1	1	1	1	1	1	1	1	1	1	1	1	1	1	1	1	1	1	1	1	1	1	1	1	1	1	1	1	1	1	1	1	1	1
Hydrochloric acid	1	1	1	1	1	1	1	1	1	1	1	1	1	1	1	1	1	1	1	1	1	1	1	1	1	1	1	1	1	1	1	1	1	1	1	1
Hydrogen fluoride	1	1	1	1	1	1	1	1	1	1	1	1	1	1	1	1	1	1	1	1	1	1	1	1	1	1	1	1	1	1	1	1	1	1	1	1
Lead II	1	1	1	1	1	1	1	1	1	1	1	1	1	1	1	1	1	1	1	1	1	1	1	1	1	1	1	1	1	1	1	1	1	1	1	1
Manganese II	1	1	1	1	1	1	1	1	1	1	1	1	1	1	1	1	1	1	1	1	1	1	1	1	1	1	1	1	1	1	1	1	1	1	1	1
Mercury II	1	1	1	1	1	1	1	1	1	1	1	1	1	1	1	1	1	1	1	1	1	1	1	1	1	1	1	1	1	1	1	1	1	1	1	1
Methane, fossil	1	1	1	1	1	1	1	1	1	1	1	1	1	1	1	1	1	1	1	1	1	1	1	1	1	1	1	1	1	1	1	1	1	1	1	1
NMVOC, non-methane volatile organic compounds	1	1	1	1	1	1	1	1	1	1	1	1	1	1	1	1	1	1	1	1	1	1	1	1	1	1	1	1	1	1	1	1	1	1	1	1
Nickel II	1	1	1	1	1	1	1	1	1	1	1	1	1	1	1	1	1	1	1	1	1	1	1	1	1	1	1	1	1	1	1	1	1	1	1	1
Nitrogen oxides	1	1	1	1	1	1	1	1	1	1	1	1	1	1	1	1	1	1	1	1	1	1	1	1	1	1	1	1	1	1	1	1	1	1	1	1
PAH, polycyclic aromatic hydrocarbons	1	1	1	1	1	1	1	1	1	1	1	1	1	1	1	1	1	1	1	1	1	1	1	1	1	1	1	1	1	1	1	1	1	1	1	1
Particulate Matter, < 2.5 um	1	1	1	1	1	1	1	1	1	1	1	1	1	1	1	1	1	1	1	1	1	1	1	1	1	1	1	1	1	1	1	1	1	1	1	1
Particulate Matter, > 10 um	1	1	1	1	1	1	1	1	1	1	1	1	1	1	1	1	1	1	1	1	1	1	1	1	1	1	1	1	1	1	1	1	1	1	1	1
Particulate Matter, > 2.5 um and < 10um	1	1	1	1	1	1	1	1	1	1	1	1	1	1	1	1	1	1	1	1	1	1	1	1	1	1	1	1	1	1	1	1	1	1	1	1
Phosphorus	1	1	1	1	1	1	1	1	1	1	1	1	1	1	1	1	1	1	1	1	1	1	1	1	1	1	1	1	1	1	1	1	1	1	1	1
Polychlorinated biphenyls	1	1	1	1	1	1	1	1	1	1	1	1	1	1	1	1	1	1	1	1	1	1	1	1	1	1	1	1	1	1	1	1	1	1	1	1
Selenium IV	1	1	1	1	1	1	1	1	1	1	1	1	1	1	1	1	1	1	1	1	1	1	1	1	1	1	1	1	1	1	1	1	1	1	1	1
Sulfate	1	1	1	1	1	1	1	1	1	1	1	1	1	1	1	1	1	1	1	1	1	1	1	1	1	1	1	1	1	1	1	1	1	1	1	1
Sulfur dioxide	1	1	1	1	1	1	1	1	1	1	1	1	1	1	1	1	1	1	1	1	1	1	1	1	1	1	1	1	1	1	1	1	1	1	1	1
Tellurium	1	1	1	1	1	1	1	1	1	1	1	1	1	1	1	1	1	1	1	1	1	1	1	1	1	1	1	1	1	1	1	1	1	1	1	1
Tin ion	1	1	1	1	1	1	1	1	1	1	1	1	1	1	1	1	1	1	1	1	1	1	1	1	1	1	1	1	1	1	1	1	1	1	1	1
Titanium ion	1	1	1	1	1	1	1	1	1	1	1	1	1	1	1	1	1	1	1	1	1	1	1	1	1	1	1	1	1	1	1	1	1	1	1	1
Vanadium V	1	1	1	1	1	1	1	1	1	1	1	1	1	1	1	1	1	1	1	1	1	1	1	1	1	1	1	1	1	1	1	1	1	1	1	1
Water	1	1	1	1	1	1	1	1	1	1	1	1	1	1	1	1	1	1	1	1	1	1	1	1	1	1	1	1	1	1	1	1	1	1	1	1
Water, cooling, unspecified natural origin	1	1	1	1	1	1	1	1	1	1	1	1	1	1	1	1	1	1	1	1	1	1	1	1	1	1	1	1	1	1	1	1	1	1	1	1
Water, unspecified natural origin	1	1	1	1	1	1	1	1	1	1	1	1	1	1	1	1	1	1	1	1	1	1	1	1	1	1	1	1	1	1	1	1	1	1	1	1
Zinc II	1	1	1	1	1	1	1	1	1	1	1	1	1	1	1	1	1	1	1	1	1	1	1	1	1	1	1	1	1	1	1	1	1	1	1	1
carbon dioxide, captured at steel production plant, with underground storage, post, 200 km	1	11.8914	15.1393	21.692	22.4111	35.7641	0	37.4592	40.2487	42.9431	58.1758	67.1536	2.47325	39.6732	39.5145	70.9501	116.138	118.119	0	0	0	0	0	0	0	0	0	0	0	0	0	0	0	0	0	0
electric arc furnace slag, for recovery, Recycled Content cut-off	1	1	1	1	1	1	1	1	1	1	1	1	1	1	1	1	1	1	1	1	1	1	1	1	1	1	1	1	1	1	1	1	1	1	1	1
market for aluminium, cast alloy	1	1	1	1	1	1	1	1	1	1	1	1	1	1	1	1	1	1	1	1	1	1	1	1	1	1	1	1	1	1	1	1	1	1	1	1
market for aluminium, primary, ingot	1	1	1	1	1	1	1	1	1	1	1	1	1	1	1	1	1	1	1	1	1	1	1	1	1	1	1	1	1	1	1	1	1	1	1	1
market for aluminium, wrought alloy	1	1	1	1	1	1	1	1	1	1	1	1	1	1	1	1	1	1	1	1	1	1	1	1	1	1	1	1	1	1	1	1	1	1	1	1
market for anode, for metal electrolysis	1	1	1	1	1	1	1	1	1	1	1	1	1	1	1	1	1	1	1	1	1	1	1	1	1	1	1	1	1	1	1	1	1	1	1	1
market for argon, liquid	1	1	1	1	1	1	1	1	1	1	1	1	1	1	1	1	1	1	1	1	1	1	1	1	1	1	1	1	1	1	1	1	1	1	1	1
market for calcium carbide, technical grade	1	1	1	1	1	1	1	1	1	1	1	1	1	1	1	1	1	1	1	1	1	1	1	1	1	1	1	1	1	1	1	1	1	1	1	1
market for cast iron	1	1	1	1	1	1	1	1	1	1	1	1	1	1	1	1	1	1	1	1	1	1	1	1	1	1	1	1	1	1	1	1	1	1	1	1
market for chemical, inorganic	1	1	1	1	1	1	1	1	1	1	1	1	1	1	1	1	1	1	1	1	1	1	1	1	1	1	1	1	1	1	1	1	1	1	1	1
market for coke	1	1	1	1	1	1	1.11631	1.11417	1.11417	1.10366	1.0869	1.07672	1.12135	1.12135	1.12135	1.12135	1.12135	1.12135	1.06	1.05174	1.04228	1.02443	1.00603	1	1.11004	1.11004	1.11004	1.10243	1.08725	1.07168	1.12135	1.12135	1.12135	1.12135	1.12135	1.1094
market for diesel, burned in building machine	1	1	1	1	1	1	1.11631	1.11417	1.11417	1.10366	1.0869	1.07672	1.12135	1.12135	1.12135	1.12135	1.12135	1.12135	1.06	1.05174	1.04228	1.02443	1.00603	1	1.11004	1.11004	1.11004	1.10243	1.08725	1.07168	1.12135	1.12135	1.12135	1.12135	1.12135	1.1094
market for dolomite	1	1	1	1	1	1	1	1	1	1	1	1	1	1	1	1	1	1	1	1	1	1	1	1	1	1	1	1	1	1	1	1	1	1	1	1
market for electric arc furnace converter	1	1	1	1	1	1	1	1	1	1	1	1	1	1	1	1	1	1	1	1	1	1	1	1	1	1	1	1	1	1	1	1	1	1	1	1
market for electric arc furnace dust	1	1	1	1	1	1	1	1	1	1	1	1	1	1	1	1	1	1	1	1	1	1	1	1	1	1	1	1	1	1	1	1	1	1	1	1
market for electric arc furnace secondary metallurgy slag	1	1	1	1	1	1	1	1	1	1	1	1	1	1	1	1	1	1	1	1	1	1	1	1	1	1	1	1	1	1	1	1	1	1	1	1
market for electric arc furnace slag	1	1	1	1	1	1	1	1	1	1	1	1	1	1	1	1	1	1	1	1	1	1	1	1	1	1	1	1	1	1	1	1	1	1	1	1
market for electricity, high voltage	1	1	1	1	1	1	1.11631	1.11417	1.11417	1.10366	1.0869	1.07672	1.12135	1.12135	1.12135	1.12135	1.12135	1.12135	1.06	1.05174	1.04228	1.02443	1.00603	1	1.11004	1.11004	1.11004	1.10243	1.08725	1.07168	1.12135	1.12135	1.12135	1.12135	1.12135	1.1094
market for electricity, low voltage	1	1	1	1	1	1	1.11631	1.11417	1.11417	1.10366	1.0869	1.07672	1.12135	1.12135	1.12135	1.12135	1.12135	1.12135	1.06	1.05174	1.04228	1.02443	1.00603	1	1.11004	1.11004	1.11004	1.10243	1.08725	1.07168	1.12135	1.12135	1.12135	1.12135	1.12135	1.1094
market for electricity, medium voltage	1	1	1	1	1	1	1.11631	1.11417	1.11417	1.10366	1.0869	1.07672	1.12135	1.12135	1.12135	1.12135	1.12135	1.12135	1.06	1.05174	1.04228	1.02443	1.00603	1	1.11004	1.11004	1.11004	1.10243	1.08725	1.07168	1.12135	1.12135	1.12135	1.12135	1.12135	1.1094
market for electrode, negative, Ni	1	1	1	1	1	1	1	1	1	1	1	1	1	1	1	1	1	1	1	1	1	1	1	1	1	1	1	1	1	1	1	1	1	1	1	1
market for ethylene glycol	1	1	1	1	1	1	1	1	1	1	1	1	1	1	1	1	1	1	1	1	1	1	1	1	1	1	1	1	1	1	1	1	1	1	1	1
market for ferrochromium, high-carbon, 68% Cr	1	1	1	1	1	1	1	1	1	1	1	1	1	1	1	1	1	1	1	1	1	1	1	1	1	1	1	1	1	1	1	1	1	1	1	1
market for ferromanganese, high-coal, 74.5% Mn	1	1	1	1	1	1	1.11631	1.11417	1.11417	1.10366	1.0869	1.07672	1.12135	1.12135	1.12135	1.12135	1.12135	1.12135	1.06	1.05174	1.04228	1.02443	1.00603	1	1.11004	1.11004	1.11004	1.10243	1.08725	1.07168	1.12135	1.12135	1.12135	1.12135	1.12135	1.1094
market for ferrosilicon	1	1	1	1	1	1	1	1	1	1	1	1	1	1	1	1	1	1	1	1	1	1	1	1	1	1	1	1	1	1	1	1	1	1	1	1
market for fluorspar, 97% purity	1	1	1	1	1	1	1	1	1	1	1	1	1	1	1	1	1	1	1	1	1	1	1	1	1	1	1	1	1	1	1	1	1	1	1	1
market for hard coal	1	1	1	1	1	1	1.11631	1.11417	1.11417	1.10366	1.0869	1.07672	1.12135	1.12135	1.12135	1.12135	1.12135	1.12135	1.06	1.05174	1.04228	1.02443	1.00603	1	1.11004	1.11004	1.11004	1.10243	1.08725	1.07168	1.12135	1.12135	1.12135	1.12135	1.12135	1.1094
market for heat, district or industrial, natural gas	1	1	1	1	1	1	1.11631	1.11417	1.11417	1.10366	1.0869	1.07672	1.12135	1.12135	1.12135	1.12135	1.12135	1.12135	1.06	1.05174	1.04228	1.02443	1.00603	1	1.11004	1.11004	1.11004	1.10243	1.08725	1.07168	1.12135	1.12135	1.12135	1.12135	1.12135	1.1094
market for heat, district or industrial, other than natural gas	1	1	1	1	1	1	1.11631	1.11417	1.11417	1.10366	1.0869	1.07672	1.12135	1.12135	1.12135	1.12135	1.12135	1.12135	1.06	1.05174	1.04228	1.02443	1.00603	1	1.11004	1.11004	1.11004	1.10243	1.08725	1.07168	1.12135	1.12135	1.12135	1.12135	1.12135	1.1094
market for heavy fuel oil	1	1	1	1	1	1	1.11631	1.11417	1.11417	1.10366	1.0869	1.07672	1.12135	1.12135	1.12135	1.12135	1.12135	1.12135	1.06	1.05174	1.04228	1.02443	1.00603	1	1.11004	1.11004	1.11004	1.10243	1.08725	1.07168	1.12135	1.12135	1.12135	1.12135	1.12135	1.1094
market for hydrochloric acid, without water, in 30% solution state	1	1	1	1	1	1	1	1	1	1	1	1	1	1	1	1	1	1	1	1	1	1	1	1	1	1	1	1	1	1	1	1	1	1	1	1
market for inert waste	1	1	1	1	1	1	1	1	1	1	1	1	1	1	1	1	1	1	1	1	1	1	1	1	1	1	1	1	1	1	1	1	1	1	1	1
market for inert waste, for final disposal	1	1	1	1	1	1	1	1	1	1	1	1	1	1	1	1	1	1	1	1	1	1	1	1	1	1	1	1	1	1	1	1	1	1	1	1
market for iron scrap, sorted, pressed	1	1	1	1	1	1	1	1	1	1	1	1	1	1	1	1	1	1	1	1	1	1	1	1	1	1	1	1	1	1	1	1	1	1	1	1
market for iron scrap, unsorted	1	1	1	1	1	1	1	1	1	1	1	1	1	1	1	1	1	1	1	1	1	1	1	1	1	1	1	1	1	1	1	1	1	1	1	1
market for lime	1	1	1	1	1	1	1	1	1	1	1	1	1	1	1	1	1	1	1	1	1	1	1	1	1	1	1	1	1	1	1	1	1	1	1	1
market for liquefied petroleum gas	1	1	1	1	1	1	1.11631	1.11417	1.11417	1.10366	1.0869	1.07672	1.12135	1.12135	1.12135	1.12135	1.12135	1.12135	1.06	1.05174	1.04228	1.02443	1.00603	1	1.11004	1.11004	1.11004	1.10243	1.08725	1.07168	1.12135	1.12135	1.12135	1.12135	1.12135	1.1094
market for lubricating oil	1	1	1	1	1	1	1.11631	1.11417	1.11417	1.10366	1.0869	1.07672	1.12135	1.12135	1.12135	1.12135	1.12135	1.12135	1.06	1.05174	1.04228	1.02443	1.00603	1	1.11004	1.11004	1.11004	1.10243	1.08725	1.07168	1.12135	1.12135	1.12135	1.12135	1.12135	1.1094
market for molybdenum trioxide	1	1	1	1	1	1	1	1	1	1	1	1	1	1	1	1	1	1	1	1	1	1	1	1	1	1	1	1	1	1	1	1	1	1	1	1
market for natural gas, high pressure	1	1	1	1	1	1	1.11631	1.11417	1.11417	1.10366	1.0869	1.07672	1.12135	1.12135	1.12135	1.12135	1.12135	1.12135	1.06	1.05174	1.04228	1.02443	1.00603	1	1.11004	1.11004	1.11004	1.10243	1.08725	1.07168	1.12135	1.12135	1.12135	1.12135	1.12135	1.1094
market for nickel, class 1	1	1	1	1	1	1	1	1	1	1	1	1	1	1	1	1	1	1	1	1	1	1	1	1	1	1	1	1	1	1	1	1	1	1	1	1
market for nitrogen, liquid	1	1	1	1	1	1	1	1	1	1	1	1	1	1	1	1	1	1	1	1	1	1	1	1	1	1	1	1	1	1	1	1	1	1	1	1
market for oxygen, liquid	1	1	1	1	1	1	1	1	1	1	1	1	1	1	1	1	1	1	1	1	1	1	1	1	1	1	1	1	1	1	1	1	1	1	1	1
market for pig iron	1	1	1	1	1	1	1	1	1	1	1	1	1	1	1	1	1	1	1	1	1	1	1	1	1	1	1	1	1	1	1	1	1	1	1	1
market for propane, burned in building machine	1	1	1	1	1	1	1	1	1	1	1	1	1	1	1	1	1	1	1	1	1	1	1	1	1	1	1	1	1	1	1	1	1	1	1	1
market for quicklime, in pieces, loose	1	1	1	1	1	1	1	1	1	1	1	1	1	1	1	1	1	1	1	1	1	1	1	1	1	1	1	1	1	1	1	1	1	1	1	1
market for refractory, basic, packed	1	1	1	1	1	1	1	1	1	1	1	1	1	1	1	1	1	1	1	1	1	1	1	1	1	1	1	1	1	1	1	1	1	1	1	1
market for silica sand	1	1	1	1	1	1	1	1	1	1	1	1	1	1	1	1	1	1	1	1	1	1	1	1	1	1	1	1	1	1	1	1	1	1	1	1
market for spent solvent mixture	1	1	1	1	1	1	1	1	1	1	1	1	1	1	1	1	1	1	1	1	1	1	1	1	1	1	1	1	1	1	1	1	1	1	1	1
market for sponge iron	1	1	1	1	1	1	1	1	1	1	1	1	1	1	1	1	1	1	1	1	1	1	1	1	1	1	1	1	1	1	1	1	1	1	1	1
market for sulfur dioxide, liquid	1	1	1	1	1	1	1	1	1	1	1	1	1	1	1	1	1	1	1	1	1	1	1	1	1	1	1	1	1	1	1	1	1	1	1	1
market for sulfuric acid	1	1	1	1	1	1	1	1	1	1	1	1	1	1	1	1	1	1	1	1	1	1	1	1	1	1	1	1	1	1	1	1	1	1	1	1
market for wastewater, average	1	1	1	1	1	1	1	1	1	1	1	1	1	1	1	1	1	1	1	1	1	1	1	1	1	1	1	1	1	1	1	1	1	1	1	1
market group for electricity, high voltage	1	1	1	1	1	1	1.11631	1.11417	1.11417	1.10366	1.0869	1.07672	1.12135	1.12135	1.12135	1.12135	1.12135	1.12135	1.06	1.05174	1.04228	1.02443	1.00603	1	1.11004	1.11004	1.11004	1.10243	1.08725	1.07168	1.12135	1.12135	1.12135	1.12135	1.12135	1.1094
market group for electricity, low voltage	1	1	1	1	1	1	1.11631	1.11417	1.11417	1.10366	1.0869	1.07672	1.12135	1.12135	1.12135	1.12135	1.12135	1.12135	1.06	1.05174	1.04228	1.02443	1.00603	1	1.11004	1.11004	1.11004	1.10243	1.08725	1.07168	1.12135	1.12135	1.12135	1.12135	1.12135	1.1094
market group for electricity, medium voltage	1	1	1	1	1	1	1.11631	1.11417	1.11417	1.10366	1.0869	1.07672	1.12135	1.12135	1.12135	1.12135	1.12135	1.12135	1.06	1.05174	1.04228	1.02443	1.00603	1	1.11004	1.11004	1.11004	1.10243	1.08725	1.07168	1.12135	1.12135	1.12135	1.12135	1.12135	1.1094
steel production, electric, low-alloyed	1	1	1	1	1	1	1	1	1	1	1	1	1	1	1	1	1	1	1	1	1	1	1	1	1	1	1	1	1	1	1	1	1	1	1	1
preperation for recycling, steel scrap, from fossil infrastructure	1	1	1	1	1	1	1	1	1	1	1	1	1	1	1	1	1	1	1	1	1	1	1	1	1	1	1	1	1	1	1	1	1	1	1	1
treatment of electric arc furnace dust, residual material landfill, pessimistic	1	1	1	1	1	1	1	1	1	1	1	1	1	1	1	1	1	1	1	1	1	1	1	1	1	1	1	1	1	1	1	1	1	1	1	1
treatment of electric arc furnace slag, low-alloyed steel, residual material landfill, pessimistic	1	1	1	1	1	1	1	1	1	1	1	1	1	1	1	1	1	1	1	1	1	1	1	1	1	1	1	1	1	1	1	1	1	1	1	1
market for wastewater from pig iron production	1	1	1	1	1	1	1	1	1	1	1	1	1	1	1	1	1	1	1	1	1	1	1	1	1	1	1	1	1	1	1	1	1	1	1	1
treatment of electric arc furnace dust, residual material landfill, optimistic	1	1	1	1	1	1	1	1	1	1	1	1	1	1	1	1	1	1	1	1	1	1	1	1	1	1	1	1	1	1	1	1	1	1	1	1
treatment of electric arc furnace slag, low-alloyed steel, residual material landfill, optimistic	1	1	1	1	1	1	1	1	1	1	1	1	1	1	1	1	1	1	1	1	1	1	1	1	1	1	1	1	1	1	1	1	1	1	1	1
treatment of electric arc furnace slag, reinforcing steel, residual material landfill, pessimistic	1	1	1	1	1	1	1	1	1	1	1	1	1	1	1	1	1	1	1	1	1	1	1	1	1	1	1	1	1	1	1	1	1	1	1	1
treatment of electric arc furnace slag, reinforcing steel, residual material landfill, optimistic	1	1	1	1	1	1	1	1	1	1	1	1	1	1	1	1	1	1	1	1	1	1	1	1	1	1	1	1	1	1	1	1	1	1	1	1
market for hot rolling, steel	1	1	1	1	1	1	1	1	1	1	1	1	1	1	1	1	1	1	1	1	1	1	1	1	1	1	1	1	1	1	1	1	1	1	1	1
steel production, converter, low-alloyed	1	1	1	1	1	1	1	1	1	1	1	1	1	1	1	1	1	1	1	1	1	1	1	1	1	1	1	1	1	1	1	1	1	1	1	1
steel production, converter, unalloyed	1	1	1	1	1	1	1	1	1	1	1	1	1	1	1	1	1	1	1	1	1	1	1	1	1	1	1	1	1	1	1	1	1	1	1	1

## Sheet: primary-chromium
name	remind - SSP1-NDC - 2025	remind - SSP1-NDC - 2030	remind - SSP1-NDC - 2035	remind - SSP1-NDC - 2040	remind - SSP1-NDC - 2045	remind - SSP1-NDC - 2050	remind - SSP2-NDC - 2025	remind - SSP2-NDC - 2030	remind - SSP2-NDC - 2035	remind - SSP2-NDC - 2040	remind - SSP2-NDC - 2045	remind - SSP2-NDC - 2050	remind - SSP5-NDC - 2025	remind - SSP5-NDC - 2030	remind - SSP5-NDC - 2035	remind - SSP5-NDC - 2040	remind - SSP5-NDC - 2045	remind - SSP5-NDC - 2050	remind - SSP1-NPi - 2025	remind - SSP1-NPi - 2030	remind - SSP1-NPi - 2035	remind - SSP1-NPi - 2040	remind - SSP1-NPi - 2045	remind - SSP1-NPi - 2050	remind - SSP2-NPi - 2025	remind - SSP2-NPi - 2030	remind - SSP2-NPi - 2035	remind - SSP2-NPi - 2040	remind - SSP2-NPi - 2045	remind - SSP2-NPi - 2050	remind - SSP5-NPi - 2025	remind - SSP5-NPi - 2030	remind - SSP5-NPi - 2035	remind - SSP5-NPi - 2040	remind - SSP5-NPi - 2045	remind - SSP5-NPi - 2050
Benzene	1	1	1	1	1	1	1	1	1	1	1	1	1	1	1	1	1	1	1	1	1	1	1	1	1	1	1	1	1	1	1	1	1	1	1	1
Benzene, hexachloro-	1	1	1	1	1	1	1	1	1	1	1	1	1	1	1	1	1	1	1	1	1	1	1	1	1	1	1	1	1	1	1	1	1	1	1	1
Cadmium II	1	1	1	1	1	1	1	1	1	1	1	1	1	1	1	1	1	1	1	1	1	1	1	1	1	1	1	1	1	1	1	1	1	1	1	1
Carbon dioxide, fossil	1	0.987534	0.984089	0.977456	0.977189	0.964302	1.3214	1.27084	1.267	1.25112	1.2132	1.19126	1.32406	1.27686	1.2778	1.23997	1.18542	1.18393	1.25369	1.24383	1.23276	1.21197	1.19089	1.1709	1.31414	1.31439	1.31471	1.30611	1.28874	1.27105	1.32771	1.32828	1.3289	1.32936	1.32987	1.31623
Carbon dioxide, non-fossil	1	1.40849	1.43491	1.37685	1.20916	0.870845	1.27493	2.00097	2.14614	2.17853	1.94863	1.54588	1.37171	1.92198	1.65915	1.40539	1.09707	0.766742	1.5781	1.59822	1.54213	1.40283	1.13917	0.748606	1.21139	1.12293	1.01117	0.859499	0.632147	0.355248	1.1573	0.957364	0.741314	0.580101	0.399466	0.210537
Carbon monoxide, fossil	1	1	1	1	1	1	1	1	1	1	1	1	1	1	1	1	1	1	1	1	1	1	1	1	1	1	1	1	1	1	1	1	1	1	1	1
Chromium III	1	1	1	1	1	1	1	1	1	1	1	1	1	1	1	1	1	1	1	1	1	1	1	1	1	1	1	1	1	1	1	1	1	1	1	1
Copper ion	1	1	1	1	1	1	1	1	1	1	1	1	1	1	1	1	1	1	1	1	1	1	1	1	1	1	1	1	1	1	1	1	1	1	1	1
Dioxins, measured as 2,3,7,8-tetrachlorodibenzo-p-dioxin	1	1	1	1	1	1	1	1	1	1	1	1	1	1	1	1	1	1	1	1	1	1	1	1	1	1	1	1	1	1	1	1	1	1	1	1
Hydrocarbons, aromatic	1	1	1	1	1	1	1	1	1	1	1	1	1	1	1	1	1	1	1	1	1	1	1	1	1	1	1	1	1	1	1	1	1	1	1	1
Hydrochloric acid	1	1	1	1	1	1	1	1	1	1	1	1	1	1	1	1	1	1	1	1	1	1	1	1	1	1	1	1	1	1	1	1	1	1	1	1
Hydrogen fluoride	1	1	1	1	1	1	1	1	1	1	1	1	1	1	1	1	1	1	1	1	1	1	1	1	1	1	1	1	1	1	1	1	1	1	1	1
Lead II	1	1	1	1	1	1	1	1	1	1	1	1	1	1	1	1	1	1	1	1	1	1	1	1	1	1	1	1	1	1	1	1	1	1	1	1
Mercury II	1	1	1	1	1	1	1	1	1	1	1	1	1	1	1	1	1	1	1	1	1	1	1	1	1	1	1	1	1	1	1	1	1	1	1	1
Nickel II	1	1	1	1	1	1	1	1	1	1	1	1	1	1	1	1	1	1	1	1	1	1	1	1	1	1	1	1	1	1	1	1	1	1	1	1
Nitrogen oxides	1	1	1	1	1	1	1	1	1	1	1	1	1	1	1	1	1	1	1	1	1	1	1	1	1	1	1	1	1	1	1	1	1	1	1	1
PAH, polycyclic aromatic hydrocarbons	1	1	1	1	1	1	1	1	1	1	1	1	1	1	1	1	1	1	1	1	1	1	1	1	1	1	1	1	1	1	1	1	1	1	1	1
Particulate Matter, < 2.5 um	1	1	1	1	1	1	1	1	1	1	1	1	1	1	1	1	1	1	1	1	1	1	1	1	1	1	1	1	1	1	1	1	1	1	1	1
Particulate Matter, > 10 um	1	1	1	1	1	1	1	1	1	1	1	1	1	1	1	1	1	1	1	1	1	1	1	1	1	1	1	1	1	1	1	1	1	1	1	1
Particulate Matter, > 2.5 um and < 10um	1	1	1	1	1	1	1	1	1	1	1	1	1	1	1	1	1	1	1	1	1	1	1	1	1	1	1	1	1	1	1	1	1	1	1	1
Polychlorinated biphenyls	1	1	1	1	1	1	1	1	1	1	1	1	1	1	1	1	1	1	1	1	1	1	1	1	1	1	1	1	1	1	1	1	1	1	1	1
Sulfur dioxide	1	1	1	1	1	1	1	1	1	1	1	1	1	1	1	1	1	1	1	1	1	1	1	1	1	1	1	1	1	1	1	1	1	1	1	1
Water	1	1	1	1	1	1	1	1	1	1	1	1	1	1	1	1	1	1	1	1	1	1	1	1	1	1	1	1	1	1	1	1	1	1	1	1
Water, cooling, unspecified natural origin	1	1	1	1	1	1	1	1	1	1	1	1	1	1	1	1	1	1	1	1	1	1	1	1	1	1	1	1	1	1	1	1	1	1	1	1
Zinc II	1	1	1	1	1	1	1	1	1	1	1	1	1	1	1	1	1	1	1	1	1	1	1	1	1	1	1	1	1	1	1	1	1	1	1	1
carbon dioxide, captured at steel production plant, with underground storage, post, 200 km	1	11.8914	15.1393	21.692	22.4111	35.7641	0	44.2909	47.589	50.7749	68.7857	79.4007	2.92431	46.9087	46.721	83.8897	137.319	139.661	0	0	0	0	0	0	0	0	0	0	0	0	0	0	0	0	0	0
market for anode, for metal electrolysis	1	1	1	1	1	1	1	1	1	1	1	1	1	1	1	1	1	1	1	1	1	1	1	1	1	1	1	1	1	1	1	1	1	1	1	1
market for argon, liquid	1	1	1	1	1	1	1	1	1	1	1	1	1	1	1	1	1	1	1	1	1	1	1	1	1	1	1	1	1	1	1	1	1	1	1	1
market for electric arc furnace converter	1	1	1	1	1	1	1	1	1	1	1	1	1	1	1	1	1	1	1	1	1	1	1	1	1	1	1	1	1	1	1	1	1	1	1	1
market for electric arc furnace dust	1	1	1	1	1	1	1	1	1	1	1	1	1	1	1	1	1	1	1	1	1	1	1	1	1	1	1	1	1	1	1	1	1	1	1	1
market for electric arc furnace secondary metallurgy slag	1	1	1	1	1	1	1	1	1	1	1	1	1	1	1	1	1	1	1	1	1	1	1	1	1	1	1	1	1	1	1	1	1	1	1	1
market for electric arc furnace slag	1	1	1	1	1	1	1	1	1	1	1	1	1	1	1	1	1	1	1	1	1	1	1	1	1	1	1	1	1	1	1	1	1	1	1	1
market for electricity, medium voltage	1	1	1	1	1	1	1.3199	1.31737	1.31737	1.30494	1.28513	1.27309	1.32585	1.32585	1.32585	1.32585	1.32585	1.32585	1.25332	1.24355	1.23236	1.21126	1.18951	1.16849	1.31249	1.31249	1.31249	1.30349	1.28554	1.26713	1.32585	1.32585	1.32585	1.32585	1.32585	1.31172
market for ferrochromium, high-carbon, 68% Cr	1	1	1	1	1	1	1	1	1	1	1	1	1	1	1	1	1	1	1	1	1	1	1	1	1	1	1	1	1	1	1	1	1	1	1	1
market for ferronickel	1	1	1	1	1	1	1	1	1	1	1	1	1	1	1	1	1	1	1	1	1	1	1	1	1	1	1	1	1	1	1	1	1	1	1	1
market for hard coal	1	1	1	1	1	1	1.3199	1.31737	1.31737	1.30494	1.28513	1.27309	1.32585	1.32585	1.32585	1.32585	1.32585	1.32585	1.25332	1.24355	1.23236	1.21126	1.18951	1.16849	1.31249	1.31249	1.31249	1.30349	1.28554	1.26713	1.32585	1.32585	1.32585	1.32585	1.32585	1.31172
market for inert waste, for final disposal	1	1	1	1	1	1	1	1	1	1	1	1	1	1	1	1	1	1	1	1	1	1	1	1	1	1	1	1	1	1	1	1	1	1	1	1
market for iron scrap, sorted, pressed	1	1	1	1	1	1	1	1	1	1	1	1	1	1	1	1	1	1	1	1	1	1	1	1	1	1	1	1	1	1	1	1	1	1	1	1
market for natural gas, high pressure	1	1	1	1	1	1	1.3199	1.31737	1.31737	1.30494	1.28513	1.27309	1.32585	1.32585	1.32585	1.32585	1.32585	1.32585	1.25332	1.24355	1.23236	1.21126	1.18951	1.16849	1.31249	1.31249	1.31249	1.30349	1.28554	1.26713	1.32585	1.32585	1.32585	1.32585	1.32585	1.31172
market for nitrogen, liquid	1	1	1	1	1	1	1	1	1	1	1	1	1	1	1	1	1	1	1	1	1	1	1	1	1	1	1	1	1	1	1	1	1	1	1	1
market for oxygen, liquid	1	1	1	1	1	1	1	1	1	1	1	1	1	1	1	1	1	1	1	1	1	1	1	1	1	1	1	1	1	1	1	1	1	1	1	1
market for quicklime, in pieces, loose	1	1	1	1	1	1	1	1	1	1	1	1	1	1	1	1	1	1	1	1	1	1	1	1	1	1	1	1	1	1	1	1	1	1	1	1
market for refractory, basic, packed	1	1	1	1	1	1	1	1	1	1	1	1	1	1	1	1	1	1	1	1	1	1	1	1	1	1	1	1	1	1	1	1	1	1	1	1
market group for electricity, medium voltage	1	1	1	1	1	1	1.3199	1.31737	1.31737	1.30494	1.28513	1.27309	1.32585	1.32585	1.32585	1.32585	1.32585	1.32585	1.25332	1.24355	1.23236	1.21126	1.18951	1.16849	1.31249	1.31249	1.31249	1.30349	1.28554	1.26713	1.32585	1.32585	1.32585	1.32585	1.32585	1.31172
steel production, electric, chromium steel 18/8	1	1	1	1	1	1	1	1	1	1	1	1	1	1	1	1	1	1	1	1	1	1	1	1	1	1	1	1	1	1	1	1	1	1	1	1
preperation for recycling, steel scrap, from fossil infrastructure	1	1	1	1	1	1	1	1	1	1	1	1	1	1	1	1	1	1	1	1	1	1	1	1	1	1	1	1	1	1	1	1	1	1	1	1
treatment of electric arc furnace dust, residual material landfill, pessimistic	1	1	1	1	1	1	1	1	1	1	1	1	1	1	1	1	1	1	1	1	1	1	1	1	1	1	1	1	1	1	1	1	1	1	1	1
treatment of electric arc furnace slag, low-alloyed steel, residual material landfill, pessimistic	1	1	1	1	1	1	1	1	1	1	1	1	1	1	1	1	1	1	1	1	1	1	1	1	1	1	1	1	1	1	1	1	1	1	1	1
market for wastewater from pig iron production	1	1	1	1	1	1	1	1	1	1	1	1	1	1	1	1	1	1	1	1	1	1	1	1	1	1	1	1	1	1	1	1	1	1	1	1
treatment of electric arc furnace dust, residual material landfill, optimistic	1	1	1	1	1	1	1	1	1	1	1	1	1	1	1	1	1	1	1	1	1	1	1	1	1	1	1	1	1	1	1	1	1	1	1	1
treatment of electric arc furnace slag, low-alloyed steel, residual material landfill, optimistic	1	1	1	1	1	1	1	1	1	1	1	1	1	1	1	1	1	1	1	1	1	1	1	1	1	1	1	1	1	1	1	1	1	1	1	1
treatment of electric arc furnace slag, reinforcing steel, residual material landfill, pessimistic	1	1	1	1	1	1	1	1	1	1	1	1	1	1	1	1	1	1	1	1	1	1	1	1	1	1	1	1	1	1	1	1	1	1	1	1
treatment of electric arc furnace slag, reinforcing steel, residual material landfill, optimistic	1	1	1	1	1	1	1	1	1	1	1	1	1	1	1	1	1	1	1	1	1	1	1	1	1	1	1	1	1	1	1	1	1	1	1	1
market for hot rolling, steel	1	1	1	1	1	1	1	1	1	1	1	1	1	1	1	1	1	1	1	1	1	1	1	1	1	1	1	1	1	1	1	1	1	1	1	1
steel production, converter, low-alloyed	1	1	1	1	1	1	1	1	1	1	1	1	1	1	1	1	1	1	1	1	1	1	1	1	1	1	1	1	1	1	1	1	1	1	1	1
steel production, converter, unalloyed	1	1	1	1	1	1	1	1	1	1	1	1	1	1	1	1	1	1	1	1	1	1	1	1	1	1	1	1	1	1	1	1	1	1	1	1

## Sheet: primary-reinforcing
name	remind - SSP1-NDC - 2025	remind - SSP1-NDC - 2030	remind - SSP1-NDC - 2035	remind - SSP1-NDC - 2040	remind - SSP1-NDC - 2045	remind - SSP1-NDC - 2050	remind - SSP2-NDC - 2025	remind - SSP2-NDC - 2030	remind - SSP2-NDC - 2035	remind - SSP2-NDC - 2040	remind - SSP2-NDC - 2045	remind - SSP2-NDC - 2050	remind - SSP5-NDC - 2025	remind - SSP5-NDC - 2030	remind - SSP5-NDC - 2035	remind - SSP5-NDC - 2040	remind - SSP5-NDC - 2045	remind - SSP5-NDC - 2050	remind - SSP1-NPi - 2025	remind - SSP1-NPi - 2030	remind - SSP1-NPi - 2035	remind - SSP1-NPi - 2040	remind - SSP1-NPi - 2045	remind - SSP1-NPi - 2050	remind - SSP2-NPi - 2025	remind - SSP2-NPi - 2030	remind - SSP2-NPi - 2035	remind - SSP2-NPi - 2040	remind - SSP2-NPi - 2045	remind - SSP2-NPi - 2050	remind - SSP5-NPi - 2025	remind - SSP5-NPi - 2030	remind - SSP5-NPi - 2035	remind - SSP5-NPi - 2040	remind - SSP5-NPi - 2045	remind - SSP5-NPi - 2050
Carbon dioxide, fossil	1	0.988594	0.985219	0.978449	0.966397	0.93524	1.00105	0.955798	0.950334	0.935113	0.907917	0.899202	0.988312	0.853496	0.852204	0.826623	0.789838	0.788288	1.00095	1.00094	1.00094	1.00096	1.00101	1.00109	1.00106	1.00108	1.00111	1.00114	1.00119	1.00125	1.00108	1.00112	1.00117	1.00121	1.00125	1.00129
Carbon dioxide, non-fossil	1	1.41527	1.45599	1.42349	1.28123	0.985316	0.967769	1.50494	1.61881	1.65659	1.5347	1.30882	1.02534	1.2906	1.11834	0.95666	0.76396	0.562354	1.26112	1.29543	1.28641	1.23466	1.0889	0.831407	0.924529	0.860506	0.782636	0.681955	0.527283	0.337163	0.873569	0.732088	0.572375	0.46125	0.343998	0.226927
Carbon monoxide, fossil	1	1	1	1	1	1	1	1	1	1	1	1	1	1	1	1	1	1	1	1	1	1	1	1	1	1	1	1	1	1	1	1	1	1	1	1
Chromium III	1	1	1	1	1	1	1	1	1	1	1	1	1	1	1	1	1	1	1	1	1	1	1	1	1	1	1	1	1	1	1	1	1	1	1	1
Copper ion	1	1	1	1	1	1	1	1	1	1	1	1	1	1	1	1	1	1	1	1	1	1	1	1	1	1	1	1	1	1	1	1	1	1	1	1
Dioxins, measured as 2,3,7,8-tetrachlorodibenzo-p-dioxin	1	1	1	1	1	1	1	1	1	1	1	1	1	1	1	1	1	1	1	1	1	1	1	1	1	1	1	1	1	1	1	1	1	1	1	1
Heat, waste	1	1	1	1	1	1	1	1	1	1	1	1	1	1	1	1	1	1	1	1	1	1	1	1	1	1	1	1	1	1	1	1	1	1	1	1
Iron ion	1	1	1	1	1	1	1	1	1	1	1	1	1	1	1	1	1	1	1	1	1	1	1	1	1	1	1	1	1	1	1	1	1	1	1	1
Lead II	1	1	1	1	1	1	1	1	1	1	1	1	1	1	1	1	1	1	1	1	1	1	1	1	1	1	1	1	1	1	1	1	1	1	1	1
Manganese II	1	1	1	1	1	1	1	1	1	1	1	1	1	1	1	1	1	1	1	1	1	1	1	1	1	1	1	1	1	1	1	1	1	1	1	1
Nitrogen oxides	1	1	1	1	1	1	1	1	1	1	1	1	1	1	1	1	1	1	1	1	1	1	1	1	1	1	1	1	1	1	1	1	1	1	1	1
PAH, polycyclic aromatic hydrocarbons	1	1	1	1	1	1	1	1	1	1	1	1	1	1	1	1	1	1	1	1	1	1	1	1	1	1	1	1	1	1	1	1	1	1	1	1
Particulate Matter, < 2.5 um	1	1	1	1	1	1	1	1	1	1	1	1	1	1	1	1	1	1	1	1	1	1	1	1	1	1	1	1	1	1	1	1	1	1	1	1
Water	1	1	1	1	1	1	1	1	1	1	1	1	1	1	1	1	1	1	1	1	1	1	1	1	1	1	1	1	1	1	1	1	1	1	1	1
Water, cooling, unspecified natural origin	1	1	1	1	1	1	1	1	1	1	1	1	1	1	1	1	1	1	1	1	1	1	1	1	1	1	1	1	1	1	1	1	1	1	1	1
Water, unspecified natural origin	1	1	1	1	1	1	1	1	1	1	1	1	1	1	1	1	1	1	1	1	1	1	1	1	1	1	1	1	1	1	1	1	1	1	1	1
blast furnace gas, Recycled Content cut-off	1	1	1	1	0.988393	0.970147	1	0.989365	0.986394	0.973528	0.960302	0.960302	0.989559	0.885119	0.883587	0.883587	0.883587	0.883587	1	1	1	1	1	1	1	1	1	1	1	1	1	1	1	1	1	1
carbon dioxide, captured at steel production plant, with underground storage, post, 200 km	1	11.8914	15.1393	21.692	22.151	34.6964	0	33.263	35.6327	37.8797	51.3996	59.8926	2.18258	31.3155	31.1363	55.9065	91.5135	93.0742	0	0	0	0	0	0	0	0	0	0	0	0	0	0	0	0	0	0
market for aluminium, wrought alloy	1	1	1	1	1	1	1	1	1	1	1	1	1	1	1	1	1	1	1	1	1	1	1	1	1	1	1	1	1	1	1	1	1	1	1	1
market for argon, liquid	1	1	1	1	1	1	1	1	1	1	1	1	1	1	1	1	1	1	1	1	1	1	1	1	1	1	1	1	1	1	1	1	1	1	1	1
market for basic oxygen furnace dust	1	1	1	1	1	1	1	1	1	1	1	1	1	1	1	1	1	1	1	1	1	1	1	1	1	1	1	1	1	1	1	1	1	1	1	1
market for basic oxygen furnace secondary metallurgy slag	1	1	1	1	1	1	1	1	1	1	1	1	1	1	1	1	1	1	1	1	1	1	1	1	1	1	1	1	1	1	1	1	1	1	1	1
market for basic oxygen furnace slag	1	1	1	1	1	1	1	1	1	1	1	1	1	1	1	1	1	1	1	1	1	1	1	1	1	1	1	1	1	1	1	1	1	1	1	1
market for basic oxygen furnace sludge	1	1	1	1	1	1	1	1	1	1	1	1	1	1	1	1	1	1	1	1	1	1	1	1	1	1	1	1	1	1	1	1	1	1	1	1
market for basic oxygen furnace waste	1	1	1	1	1	1	1	1	1	1	1	1	1	1	1	1	1	1	1	1	1	1	1	1	1	1	1	1	1	1	1	1	1	1	1	1
market for blast oxygen furnace converter	1	1	1	1	1	1	1	1	1	1	1	1	1	1	1	1	1	1	1	1	1	1	1	1	1	1	1	1	1	1	1	1	1	1	1	1
market for calcium carbide, technical grade	1	1	1	1	1	1	1	1	1	1	1	1	1	1	1	1	1	1	1	1	1	1	1	1	1	1	1	1	1	1	1	1	1	1	1	1
market for coke	1	1	1	1	0.988393	0.970147	1	0.989365	0.986394	0.973528	0.960302	0.960302	0.989559	0.885119	0.883587	0.883587	0.883587	0.883587	1	1	1	1	1	1	1	1	1	1	1	1	1	1	1	1	1	1
market for compressed air, 600 kPa gauge	1	1	1	1	1	1	1	1	1	1	1	1	1	1	1	1	1	1	1	1	1	1	1	1	1	1	1	1	1	1	1	1	1	1	1	1
market for copper, cathode	1	1	1	1	1	1	1	1	1	1	1	1	1	1	1	1	1	1	1	1	1	1	1	1	1	1	1	1	1	1	1	1	1	1	1	1
market for diesel	1	1	1	1	0.988393	0.970147	1	0.989365	0.986394	0.973528	0.960302	0.960302	0.989559	0.885119	0.883587	0.883587	0.883587	0.883587	1	1	1	1	1	1	1	1	1	1	1	1	1	1	1	1	1	1
market for dolomite	1	1	1	1	1	1	1	1	1	1	1	1	1	1	1	1	1	1	1	1	1	1	1	1	1	1	1	1	1	1	1	1	1	1	1	1
market for electricity, medium voltage	1	1	1	1	0.988393	0.970147	1	0.989365	0.986394	0.973528	0.960302	0.960302	0.989559	0.885119	0.883587	0.883587	0.883587	0.883587	1	1	1	1	1	1	1	1	1	1	1	1	1	1	1	1	1	1
market for electrode, negative, Ni	1	1	1	1	1	1	1	1	1	1	1	1	1	1	1	1	1	1	1	1	1	1	1	1	1	1	1	1	1	1	1	1	1	1	1	1
market for ferromanganese, high-coal, 74.5% Mn	1	1	1	1	0.988393	0.970147	1	0.989365	0.986394	0.973528	0.960302	0.960302	0.989559	0.885119	0.883587	0.883587	0.883587	0.883587	1	1	1	1	1	1	1	1	1	1	1	1	1	1	1	1	1	1
market for ferronickel	1	1	1	1	1	1	1	1	1	1	1	1	1	1	1	1	1	1	1	1	1	1	1	1	1	1	1	1	1	1	1	1	1	1	1	1
market for ferrosilicon	1	1	1	1	1	1	1	1	1	1	1	1	1	1	1	1	1	1	1	1	1	1	1	1	1	1	1	1	1	1	1	1	1	1	1	1
market for inert waste, for final disposal	1	1	1	1	1	1	1	1	1	1	1	1	1	1	1	1	1	1	1	1	1	1	1	1	1	1	1	1	1	1	1	1	1	1	1	1
market for iron ore concentrate	1	1	1	1	1	1	1	1	1	1	1	1	1	1	1	1	1	1	1	1	1	1	1	1	1	1	1	1	1	1	1	1	1	1	1	1
market for iron scrap, sorted, pressed	1	1	1	1	1	1	1	1	1	1	1	1	1	1	1	1	1	1	1	1	1	1	1	1	1	1	1	1	1	1	1	1	1	1	1	1
market for lime	1	1	1	1	1	1	1	1	1	1	1	1	1	1	1	1	1	1	1	1	1	1	1	1	1	1	1	1	1	1	1	1	1	1	1	1
market for liquefied petroleum gas	1	1	1	1	0.988393	0.970147	1	0.989365	0.986394	0.973528	0.960302	0.960302	0.989559	0.885119	0.883587	0.883587	0.883587	0.883587	1	1	1	1	1	1	1	1	1	1	1	1	1	1	1	1	1	1
market for manganese	1	1	1	1	1	1	1	1	1	1	1	1	1	1	1	1	1	1	1	1	1	1	1	1	1	1	1	1	1	1	1	1	1	1	1	1
market for mill scale	1	1	1	1	1	1	1	1	1	1	1	1	1	1	1	1	1	1	1	1	1	1	1	1	1	1	1	1	1	1	1	1	1	1	1	1
market for molybdenite	1	1	1	1	1	1	1	1	1	1	1	1	1	1	1	1	1	1	1	1	1	1	1	1	1	1	1	1	1	1	1	1	1	1	1	1
market for natural gas, high pressure	1	1	1	1	0.988393	0.970147	1	0.989365	0.986394	0.973528	0.960302	0.960302	0.989559	0.885119	0.883587	0.883587	0.883587	0.883587	1	1	1	1	1	1	1	1	1	1	1	1	1	1	1	1	1	1
market for nickel, class 1	1	1	1	1	1	1	1	1	1	1	1	1	1	1	1	1	1	1	1	1	1	1	1	1	1	1	1	1	1	1	1	1	1	1	1	1
market for nitrogen, liquid	1	1	1	1	1	1	1	1	1	1	1	1	1	1	1	1	1	1	1	1	1	1	1	1	1	1	1	1	1	1	1	1	1	1	1	1
market for oxygen, liquid	1	1	1	1	1	1	1	1	1	1	1	1	1	1	1	1	1	1	1	1	1	1	1	1	1	1	1	1	1	1	1	1	1	1	1	1
market for pig iron	1	1	1	1	1	1	1	1	1	1	1	1	1	1	1	1	1	1	1	1	1	1	1	1	1	1	1	1	1	1	1	1	1	1	1	1
market for propane	1	1	1	1	1	1	1	1	1	1	1	1	1	1	1	1	1	1	1	1	1	1	1	1	1	1	1	1	1	1	1	1	1	1	1	1
market for quicklime, in pieces, loose	1	1	1	1	1	1	1	1	1	1	1	1	1	1	1	1	1	1	1	1	1	1	1	1	1	1	1	1	1	1	1	1	1	1	1	1
market for sponge iron	1	1	1	1	1	1	1	1	1	1	1	1	1	1	1	1	1	1	1	1	1	1	1	1	1	1	1	1	1	1	1	1	1	1	1	1
market for steam, in chemical industry	1	1	1	1	0.988393	0.970147	1	0.989365	0.986394	0.973528	0.960302	0.960302	0.989559	0.885119	0.883587	0.883587	0.883587	0.883587	1	1	1	1	1	1	1	1	1	1	1	1	1	1	1	1	1	1
market for wastewater from pig iron production	1	1	1	1	1	1	1	1	1	1	1	1	1	1	1	1	1	1	1	1	1	1	1	1	1	1	1	1	1	1	1	1	1	1	1	1
market for wastewater, average	1	1	1	1	1	1	1	1	1	1	1	1	1	1	1	1	1	1	1	1	1	1	1	1	1	1	1	1	1	1	1	1	1	1	1	1
market group for electricity, medium voltage	1	1	1	1	0.988393	0.970147	1	0.989365	0.986394	0.973528	0.960302	0.960302	0.989559	0.885119	0.883587	0.883587	0.883587	0.883587	1	1	1	1	1	1	1	1	1	1	1	1	1	1	1	1	1	1
steel production, converter, low-alloyed	1	1	1	1	1	1	1	1	1	1	1	1	1	1	1	1	1	1	1	1	1	1	1	1	1	1	1	1	1	1	1	1	1	1	1	1
preperation for recycling, steel scrap, from fossil infrastructure	1	1	1	1	1	1	1	1	1	1	1	1	1	1	1	1	1	1	1	1	1	1	1	1	1	1	1	1	1	1	1	1	1	1	1	1
treatment of electric arc furnace dust, residual material landfill, pessimistic	1	1	1	1	1	1	1	1	1	1	1	1	1	1	1	1	1	1	1	1	1	1	1	1	1	1	1	1	1	1	1	1	1	1	1	1
treatment of electric arc furnace slag, low-alloyed steel, residual material landfill, pessimistic	1	1	1	1	1	1	1	1	1	1	1	1	1	1	1	1	1	1	1	1	1	1	1	1	1	1	1	1	1	1	1	1	1	1	1	1
treatment of electric arc furnace dust, residual material landfill, optimistic	1	1	1	1	1	1	1	1	1	1	1	1	1	1	1	1	1	1	1	1	1	1	1	1	1	1	1	1	1	1	1	1	1	1	1	1
treatment of electric arc furnace slag, low-alloyed steel, residual material landfill, optimistic	1	1	1	1	1	1	1	1	1	1	1	1	1	1	1	1	1	1	1	1	1	1	1	1	1	1	1	1	1	1	1	1	1	1	1	1
treatment of electric arc furnace slag, reinforcing steel, residual material landfill, pessimistic	1	1	1	1	1	1	1	1	1	1	1	1	1	1	1	1	1	1	1	1	1	1	1	1	1	1	1	1	1	1	1	1	1	1	1	1
treatment of electric arc furnace slag, reinforcing steel, residual material landfill, optimistic	1	1	1	1	1	1	1	1	1	1	1	1	1	1	1	1	1	1	1	1	1	1	1	1	1	1	1	1	1	1	1	1	1	1	1	1
market for hot rolling, steel	1	1	1	1	1	1	1	1	1	1	1	1	1	1	1	1	1	1	1	1	1	1	1	1	1	1	1	1	1	1	1	1	1	1	1	1
steel production, converter, unalloyed	1	1	1	1	1	1	1	1	1	1	1	1	1	1	1	1	1	1	1	1	1	1	1	1	1	1	1	1	1	1	1	1	1	1	1	1
