# Supplementary material for: Digesting fossil infrastructure for cleaner energy transitions
Source: Research Square preprint supplement (doi:10.21203/rs.3.rs-6346491/v1), 2025-06-06
Supplement: Supplementary file 61 [file fossil_infrastructure_inventory.xlsx]

## Sheet: LCI_per_unit
name	type	fuel	unit	location	ID	unit/capacity	capacity unit	plywood [cubic meter]	steel, low-alloyed, hot rolled [kilogram]	synthetic rubber [kilogram]	copper, cathode [kilogram]	concrete, normal strength [cubic meter]	sawnwood, hardwood, raw, dried (u=20%) [cubic meter]	reinforcing steel [kilogram]	cast iron [kilogram]	steel, chromium steel 18/8, hot rolled [kilogram]	zinc [kilogram]	chemical, organic [kilogram]	chemical, inorganic [kilogram]	activated bentonite [kilogram]	tap water [kilogram]	aluminium, wrought alloy [kilogram]	barite [kilogram]	cement, Portland [kilogram]	lubricating oil [kilogram]	lignite [kilogram]	polyvinylchloride, bulk polymerised [kilogram]	aluminium, cast alloy [kilogram]	epoxy resin, liquid [kilogram]	silicon, metallurgical grade [kilogram]	sand [kilogram]	pitch [kilogram]	cement, unspecified [kilogram]	polyethylene, high density, granulate [kilogram]	polyethylene, low density, granulate [kilogram]	unreinforced concrete, 15MPa [cubic meter]	building, multi-storey [cubic meter]	chromium [kilogram]	nickel, class 1 [kilogram]	cobalt [kilogram]	stone wool, packed [kilogram]	ceramic tile [kilogram]	stone wool [kilogram]	Rubber	Cr	Wood	Chemicals	Water	PE
mine infrastructure, open cast, hard coal	coal mine	hard coal	unit	GLO	M01	0.30303	Mt/a	165	900000	3000000	90000	3750	0	2100000	0	0	0	0	0	0	0	0	0	0	0	0	0	0	0	0	0	0	0	0	0	0	0	0	0	0	0	0	0	3000000	0	165	0	0	0
mine infrastructure, open cast, lignite	coal mine	lignite	unit	RoW	M02	0.30303	Mt/a	5500	4000000	0	700000	7100	0	13000000	0	0	0	0	0	0	0	0	0	0	0	0	0	0	0	0	0	0	0	0	0	0	0	0	0	0	0	0	0	0	0	5500	0	0	0
mine infrastructure, open cast, lignite	coal mine	lignite	unit	RER	M03	0.30303	Mt/a	5500	4000000	0	700000	7100	0	13000000	0	0	0	0	0	0	0	0	0	0	0	0	0	0	0	0	0	0	0	0	0	0	0	0	0	0	0	0	0	0	0	5500	0	0	0
mine infrastructure, underground, hard coal	coal mine	hard coal	unit	CN	M04	1	Mt/a	165	3000000	0	60000	91000	389000	15000000	0	0	0	0	0	0	0	0	0	0	0	0	0	0	0	0	0	0	0	0	0	0	0	0	0	0	0	0	0	0	0	389165	0	0	0
mine infrastructure, underground, hard coal	coal mine	hard coal	unit	RoW	M05	0.30303	Mt/a	165	3000000	0	60000	91000	389000	15000000	0	0	0	0	0	0	0	0	0	0	0	0	0	0	0	0	0	0	0	0	0	0	0	0	0	0	0	0	0	0	0	389165	0	0	0
pipeline, natural gas, long distance, high capacity, offshore	pipeline	natural gas	kilometer	GLO	P04	1	kilometer	0	0	0	0.21	361	0	605000	4.2	0	175	0	0	0	0	0	0	0	0	0	0	3320	0	5.25	0	0	0	0	0	0	0	0	0	0	0	0	0	0	0	0	0	0	0
pipeline, natural gas, long distance, high capacity, onshore	pipeline	natural gas	kilometer	GLO	P05	1	kilometer	0	0	0	0	0	0	376000	0	0	0	0	0	0	0	0	0	0	0	0	0	0	0	0	2280000	2320	0	0	4640	0	0	0	0	0	0	0	0	0	0	0	0	0	4640
pipeline, natural gas, long distance, low capacity, onshore	pipeline	natural gas	kilometer	GLO	P06	1	kilometer	0	0	0	0	0	0	240000	0	0	0	0	0	0	0	0	0	0	0	0	0	0	0	0	1950000	2320	0	0	4640	0	0	0	0	0	0	0	0	0	0	0	0	0	4640
pipeline, petroleum	pipeline	oil	kilometer	RoW	P09	1	kilometer	0	15000	0	0	0	0	125000	0	0	0	0	0	0	0	0	0	0	0	0	0	0	0	0	660000	0	0	0	0	0	0	0	0	0	0	0	0	0	0	0	0	0	0
pipeline, petroleum	pipeline	oil	kilometer	RER	P10	1	kilometer	0	15000	0	0	0	0	125000	0	0	0	0	0	0	0	0	0	0	0	0	0	0	0	0	660000	0	0	0	0	0	0	0	0	0	0	0	0	0	0	0	0	0	0
pipeline, petroleum, offshore	pipeline	oil	kilometer	GLO	P11	1	kilometer	0	40000	0	0.21	49.091	0	360000	4.2	0	175	0	0	0	0	0	0	0	0	0	0	3315.3	0	5.25	175200	90000	0	0	0	0	0	0	0	0	0	0	0	0	0	0	0	0	0
offshore platform, natural gas	wells	natural gas	unit	GLO	W01	2.24999e-11	cubic meter	0	13100000	0	15.2	4090	0	0	303	0	7820	0	0	0	2830000	172040	0	0	0	0	30000	80960	73000	379	0	0	0	0	0	0	0	0	0	0	0	0	0	0	0	0	0	2830000	0
offshore platform, petroleum	wells	oil	unit	GLO	W02	4.07234e-11	kilogram	0	1140000	0	8.64	614	0	0	173	7510	7200	0	0	0	0	0	0	0	0	0	0	136000	0	216	0	0	0	0	0	0	0	0	0	0	0	0	0	0	0	0	0	0	0
offshore well, oil/gas	wells	natural gas	meter	GLO	W01	3000	unit	0	0	0	0	0	0	210	0	0	0	9.05	42.2	20	0	0	270	200	60	0.2	0	0	0	0	0	0	0	0	0	0	0	0	0	0	0	0	0	0	0	0	51.25	0	0
offshore well, oil/gas	wells	oil	meter	GLO	W02	3000	unit	0	0	0	0	0	0	210	0	0	0	9.05	42.2	20	0	0	270	200	60	0.2	0	0	0	0	0	0	0	0	0	0	0	0	0	0	0	0	0	0	0	0	51.25	0	0
onshore natural gas field infrastructure	wells	natural gas	unit	GLO	W03	3.00621e-10	cubic meter	0	0	0	0	0	0	1500000	0	0	0	0	0	0	0	0	0	0	0	0	0	0	0	0	0	0	0	0	0	0	0	0	0	0	0	0	0	0	0	0	0	0	0
onshore petroleum field infrastructure	wells	oil	unit	GLO	W04	4.93673e-09	kilogram	0	0	0	0	0	0	720000	0	0	0	0	0	0	0	0	0	0	0	0	0	0	0	0	0	0	0	0	0	0	0	0	0	0	0	0	0	0	0	0	0	0	0
onshore well, oil/gas	wells	natural gas	meter	GLO	W03	3000	unit	0	0	0	0	0	0	210	0	0	0	9.05	42.2	20	0	0	270	200	60	0.2	0	0	0	0	0	0	0	0	0	0	0	0	0	0	0	0	0	0	0	0	51.25	0	0
onshore well, oil/gas	wells	oil	meter	GLO	W04	3000	unit	0	0	0	0	0	0	210	0	0	0	9.05	42.2	20	0	0	270	200	60	0.2	0	0	0	0	0	0	0	0	0	0	0	0	0	0	0	0	0	0	0	0	51.25	0	0
gas power plant, 100MW electrical	power plant	natural gas	unit	RER	P01	0.01	MW	0	0	0	225000	5450	0	1650000	0	0	0	0	0	0	0	153000	0	0	0	0	0	72000	0	0	0	0	0	0	450000	0	0	0	0	0	450000	0	0	0	0	0	0	0	450000
gas power plant, 100MW electrical	power plant	natural gas	unit	RoW	P02	0.01	MW	0	0	0	440000	6000	0	8800000	0	1800000	0	0	0	0	0	299200	0	0	0	0	0	140800	0	0	0	0	0	0	1300000	0	0	976	6300	720	660000	4200	0	0	976	0	0	0	1300000
gas power plant, 300MW electrical	power plant	natural gas	unit	GLO	P03	0.00333333	MW	0	5060000	0	751000	80500	0	50600000	0	576000	0	0	0	0	0	251600	0	0	0	0	0	118400	0	0	0	0	0	442000	0	0	0	0	0	0	0	0	607000	0	0	0	0	0	442000
gas power plant, combined cycle, 400MW electrical	power plant	natural gas	unit	RoW	P04	0.0025	MW	0	0	0	75000	1820	0	550000	0	0	0	0	0	0	0	51000	0	0	0	0	0	24000	0	0	0	0	0	0	150000	0	0	0	0	0	150000	0	0	0	0	0	0	0	150000
gas power plant, combined cycle, 400MW electrical	power plant	natural gas	unit	RER	P05	0.0025	MW	0	0	0	440000	6000	0	8800000	0	1800000	0	0	0	0	0	299200	0	0	0	0	0	140800	0	0	0	0	0	0	1300000	0	0	976	6300	720	660000	4200	0	0	976	0	0	0	1300000
hard coal power plant, 100MW	power plant	hard coal	unit	GLO	P06	0.01	MW	0	5060000	0	751000	80500	0	50600000	0	576000	0	0	0	0	0	251600	0	0	0	0	0	118400	0	0	0	0	0	442000	0	0	0	0	0	0	0	0	607000	0	0	0	0	0	442000
hard coal power plant, 500MW	power plant	hard coal	unit	GLO	P07	0.002	MW	0	0	0	75000	1820	0	550000	0	0	0	0	0	0	0	51000	0	0	0	0	0	24000	0	0	0	0	0	0	150000	0	0	0	0	0	150000	0	0	0	0	0	0	0	150000
lignite power plant, 380MW	power plant	lignite	unit	RER	P08	0.00263158	MW	0	900000	0	150000	16800	0	11000000	0	100000	0	0	0	0	0	68000	0	0	0	0	0	32000	0	0	0	0	0	150000	0	0	0	0	0	0	0	0	100000	0	0	0	0	0	150000
lignite power plant, 380MW	power plant	lignite	unit	RoW	P09	0.00263158	MW	0	2250000	0	750000	50800	0	33000000	450000	750000	0	0	0	0	0	204000	0	0	60000	0	0	96000	0	0	0	0	0	300000	0	0	0	0	0	0	300000	0	0	0	0	0	0	0	300000
oil power plant, 500MW	power plant	oil	unit	RoW	P10	0.002	MW	0	2250000	0	750000	50800	0	33000000	450000	750000	0	0	0	0	0	204000	0	0	60000	0	0	96000	0	0	0	0	0	300000	0	0	0	0	0	0	300000	0	0	0	0	0	0	0	300000
oil power plant, 500MW	power plant	oil	unit	RER	P11	0.002	MW	0	3600000	0	650000	52500	0	42200000	0	400000	0	0	0	0	0	204000	0	0	0	0	0	96000	0	0	0	0	0	500000	0	0	0	0	0	0	0	0	375000	0	0	0	0	0	500000
[truncated: 20 more columns]

## Sheet: LCI_per_capacity
name	type	fuel	class	per unit	location	ID	linking uncertainty type	min	max	sigma	unit/capacity	capacity unit	plywood [cubic meter]	steel, low-alloyed, hot rolled [kilogram]	synthetic rubber [kilogram]	copper, cathode [kilogram]	concrete, normal strength [cubic meter]	sawnwood, hardwood, raw, dried (u=20%) [cubic meter]	reinforcing steel [kilogram]	cast iron [kilogram]	steel, chromium steel 18/8, hot rolled [kilogram]	zinc [kilogram]	chemical, organic [kilogram]	chemical, inorganic [kilogram]	activated bentonite [kilogram]	tap water [kilogram]	aluminium, wrought alloy [kilogram]	barite [kilogram]	cement, Portland [kilogram]	lubricating oil [kilogram]	lignite [kilogram]	polyvinylchloride, bulk polymerised [kilogram]	aluminium, cast alloy [kilogram]	epoxy resin, liquid [kilogram]	silicon, metallurgical grade [kilogram]	sand [kilogram]	pitch [kilogram]	cement, unspecified [kilogram]	polyethylene, high density, granulate [kilogram]	polyethylene, low density, granulate [kilogram]	unreinforced concrete, 15MPa [cubic meter]	building, multi-storey [cubic meter]	chromium [kilogram]	nickel, class 1 [kilogram]	cobalt [kilogram]	stone wool, packed [kilogram]	ceramic tile [kilogram]	stone wool [kilogram]	Rubber
mine infrastructure, open cast, hard coal	coal mine	hard coal	surface	Mt/a	GLO	M01	uniform	1	1	0	0.30303	Mt/a	50	272727	909091	27272.7	1136.36	0	636364	0	0	0	0	0	0	0	0	0	0	0	0	0	0	0	0	0	0	0	0	0	0	0	0	0	0	0	0	0	909091
mine infrastructure, open cast, lignite	coal mine	lignite	surface	Mt/a	RoW	M02	uniform	1	1	0	0.30303	Mt/a	1666.67	1.21212e+06	0	212121	2151.52	0	3.93939e+06	0	0	0	0	0	0	0	0	0	0	0	0	0	0	0	0	0	0	0	0	0	0	0	0	0	0	0	0	0	0
mine infrastructure, open cast, lignite	coal mine	lignite	surface	Mt/a	RER	M03	uniform	1	1	0	0.30303	Mt/a	1666.67	1.21212e+06	0	212121	2151.52	0	3.93939e+06	0	0	0	0	0	0	0	0	0	0	0	0	0	0	0	0	0	0	0	0	0	0	0	0	0	0	0	0	0	0
mine infrastructure, underground, lignite	coal mine	lignite	underground	Mt/a	RoW	M04	uniform	0.000423985	1.5	0	0.30303	Mt/a	1666.67	4.0404e+06	0	141414	52210.1	0	2.81385e+07	0	0	0	0	0	0	0	0	0	0	0	0	0	0	0	0	0	0	0	0	0	0	0	0	0	0	0	0	0	0
mine infrastructure, underground, lignite	coal mine	lignite	underground	Mt/a	RER	M05	uniform	0.000423985	1.5	0	0.30303	Mt/a	1666.67	4.0404e+06	0	141414	52210.1	0	2.81385e+07	0	0	0	0	0	0	0	0	0	0	0	0	0	0	0	0	0	0	0	0	0	0	0	0	0	0	0	0	0	0
mine infrastructure, underground & surface, lignite	coal mine	lignite	underground & surface	Mt/a	RoW	M06	uniform	3.59374e-07	2.99873	0	0.30303	Mt/a	1666.67	2.62626e+06	0	176768	27180.8	0	1.6039e+07	0	0	0	0	0	0	0	0	0	0	0	0	0	0	0	0	0	0	0	0	0	0	0	0	0	0	0	0	0	0
mine infrastructure, underground & surface, lignite	coal mine	lignite	underground & surface	Mt/a	RER	M07	uniform	3.59374e-07	2.99873	0	0.30303	Mt/a	1666.67	2.62626e+06	0	176768	27180.8	0	1.6039e+07	0	0	0	0	0	0	0	0	0	0	0	0	0	0	0	0	0	0	0	0	0	0	0	0	0	0	0	0	0	0
mine infrastructure, underground, hard coal	coal mine	hard coal	underground	Mt/a	CN	M08	uniform	1	1	0	1	Mt/a	165	3000000	0	60000	91000	389000	15000000	0	0	0	0	0	0	0	0	0	0	0	0	0	0	0	0	0	0	0	0	0	0	0	0	0	0	0	0	0	0
mine infrastructure, underground, hard coal	coal mine	hard coal	underground	Mt/a	RoW	M09	uniform	1	1	0	0.30303	Mt/a	50	909091	0	18181.8	27575.8	117879	4.54545e+06	0	0	0	0	0	0	0	0	0	0	0	0	0	0	0	0	0	0	0	0	0	0	0	0	0	0	0	0	0	0
mine infrastructure, refuse, hard coal	coal mine	hard coal	refuse	Mt/a	CN	M10	uniform	1	1	0	1	Mt/a	50	272727	909091	27272.7	1136.36	0	636364	0	0	0	0	0	0	0	0	0	0	0	0	0	0	0	0	0	0	0	0	0	0	0	0	0	0	0	0	0	909091
mine infrastructure, refuse, hard coal	coal mine	hard coal	refuse	Mt/a	RoW	M11	uniform	1	1	0	0.30303	Mt/a	50	272727	909091	27272.7	1136.36	0	636364	0	0	0	0	0	0	0	0	0	0	0	0	0	0	0	0	0	0	0	0	0	0	0	0	0	0	0	0	0	909091
mine infrastructure, underground & surface, hard coal	coal mine	hard coal	underground & surface	Mt/a	CN	M12	uniform	0	2	0	1	Mt/a	107.5	1.63636e+06	454545	43636.4	46068.2	194500	7.81818e+06	0	0	0	0	0	0	0	0	0	0	0	0	0	0	0	0	0	0	0	0	0	0	0	0	0	0	0	0	0	454545
mine infrastructure, underground & surface, hard coal	coal mine	hard coal	underground & surface	Mt/a	RoW	M13	uniform	0	2	0	0.30303	Mt/a	50	590909	454545	22727.3	14356.1	58939.4	2.59091e+06	0	0	0	0	0	0	0	0	0	0	0	0	0	0	0	0	0	0	0	0	0	0	0	0	0	0	0	0	0	454545
pipeline, natural gas, long distance, high capacity, onshore	pipeline	natural gas	high capacity	kilometer	GLO	P05	uniform	0.797	1.252	0	1	kilometer	0	0	0	0	0	0	376000	0	0	0	0	0	0	0	0	0	0	0	0	0	0	0	0	2280000	2320	0	0	4640	0	0	0	0	0	0	0	0	0
pipeline, natural gas, long distance, low capacity, onshore	pipeline	natural gas	low capacity	kilometer	GLO	P06	uniform	0.784	1.173	0	1	kilometer	0	0	0	0	0	0	240000	0	0	0	0	0	0	0	0	0	0	0	0	0	0	0	0	1950000	2320	0	0	4640	0	0	0	0	0	0	0	0	0
pipeline, petroleum	pipeline	oil	onshore & offshore	kilometer	RoW	P09	uniform	1	1	0	1	kilometer	0	15000	0	0	0	0	125000	0	0	0	0	0	0	0	0	0	0	0	0	0	0	0	0	660000	0	0	0	0	0	0	0	0	0	0	0	0	0
pipeline, petroleum	pipeline	oil	onshore & offshore	kilometer	RER	P10	uniform	1	1	0	1	kilometer	0	15000	0	0	0	0	125000	0	0	0	0	0	0	0	0	0	0	0	0	0	0	0	0	660000	0	0	0	0	0	0	0	0	0	0	0	0	0
pipeline, petroleum, offshore	pipeline	oil	offshore	kilometer	GLO	P11	uniform	1	1	0	1	kilometer	0	40000	0	0.21	49.091	0	360000	4.2	0	175	0	0	0	0	0	0	0	0	0	0	3315.3	0	5.25	175200	90000	0	0	0	0	0	0	0	0	0	0	0	0
offshore platform, natural gas	plattform	natural gas	offshore	m3	GLO	W01	uniform	0.999965	1.00004	0	2.24999e-11	cubic meter	0	0.000294749	0	3.41999e-10	9.20248e-08	0	0	6.81748e-09	0	1.7595e-07	0	0	0	6.36748e-05	3.87089e-06	0	0	0	0	6.74998e-07	1.8216e-06	1.6425e-06	8.52748e-09	0	0	0	0	0	0	0	0	0	0	0	0	0	0
offshore platform, petroleum	plattform	petroleum	offshore	kg	GLO	W02	uniform	0.90011	1.11098	0	4.07234e-11	kilogram	0	4.64247e-05	0	3.5185e-10	2.50042e-08	0	0	7.04515e-09	3.05833e-07	2.93209e-07	0	0	0	0	0	0	0	0	0	0	5.53839e-06	0	8.79626e-09	0	0	0	0	0	0	0	0	0	0	0	0	0	0
offshore well, oil/gas	borehole	natural gas	offshore	meter	GLO	W01	uniform	0.0762758	13.1103	0	3000	unit	0	0	0	0	0	0	630000	0	0	0	27150	126600	60000	0	0	810000	600000	180000	600	0	0	0	0	0	0	0	0	0	0	0	0	0	0	0	0	0	0
offshore well, oil/gas	borehole	petroleum	offshore	meter	GLO	W02	uniform	0.0349844	28.5841	0	3000	unit	0	0	0	0	0	0	630000	0	0	0	27150	126600	60000	0	0	810000	600000	180000	600	0	0	0	0	0	0	0	0	0	0	0	0	0	0	0	0	0	0
onshore natural gas field infrastructure	plattform	natural gas	onshore	m3	GLO	W03	uniform	0.654938	1.52686	0	3.00621e-10	cubic meter	0	0	0	0	0	0	0.000450931	0	0	0	0	0	0	0	0	0	0	0	0	0	0	0	0	0	0	0	0	0	0	0	0	0	0	0	0	0	0
onshore petroleum field infrastructure	plattform	petroleum	onshore	kg	GLO	W04	uniform	0.155618	6.42598	0	4.93673e-09	kilogram	0	0	0	0	0	0	0.00355445	0	0	0	0	0	0	0	0	0	0	0	0	0	0	0	0	0	0	0	0	0	0	0	0	0	0	0	0	0	0
onshore well, oil/gas	borehole	natural gas	onshore	meter	GLO	W03	uniform	0.0572023	17.4818	0	3000	unit	0	0	0	0	0	0	630000	0	0	0	27150	126600	60000	0	0	810000	600000	180000	600	0	0	0	0	0	0	0	0	0	0	0	0	0	0	0	0	0	0
onshore well, oil/gas	borehole	petroleum	onshore	meter	GLO	W04	uniform	0.0461088	21.6878	0	3000	unit	0	0	0	0	0	0	630000	0	0	0	27150	126600	60000	0	0	810000	600000	180000	600	0	0	0	0	0	0	0	0	0	0	0	0	0	0	0	0	0	0
gas power plant, 100MW electrical	power plant	natural gas	standard	MW	RER	P01	uniform	1	1	0	0.01	MW	0	0	0	2250	54.5	0	16500	0	0	0	0	0	0	0	1530	0	0	0	0	0	720	0	0	0	0	0	0	4500	0	0	0	0	0	4500	0	0	0
gas power plant, 100MW electrical	power plant	natural gas	standard	MW	RoW	P02	uniform	1	1	0	0.01	MW	0	0	0	4400	60	0	88000	0	18000	0	0	0	0	0	2992	0	0	0	0	0	1408	0	0	0	0	0	0	13000	0	0	9.76	63	7.2	6600	42	0	0
gas power plant, 300MW electrical	power plant	natural gas	standard	MW	GLO	P03	uniform	1	1	0	0.00333333	MW	0	16866.7	0	2503.33	268.333	0	168667	0	1920	0	0	0	0	0	838.667	0	0	0	0	0	394.667	0	0	0	0	0	1473.33	0	0	0	0	0	0	0	0	2023.33	0
gas power plant, combined cycle, 400MW electrical	power plant	natural gas	combined cycle	MW	RoW	P04	uniform	1	1	0	0.0025	MW	0	0	0	187.5	4.55	0	1375	0	0	0	0	0	0	0	127.5	0	0	0	0	0	60	0	0	0	0	0	0	375	0	0	0	0	0	375	0	0	0
gas power plant, combined cycle, 400MW electrical	power plant	natural gas	combined cycle	MW	RER	P05	uniform	1	1	0	0.0025	MW	0	0	0	1100	15	0	22000	0	4500	0	0	0	0	0	748	0	0	0	0	0	352	0	0	0	0	0	0	3250	0	0	2.44	15.75	1.8	1650	10.5	0	0
hard coal power plant, 100MW	power plant	hard coal	<300 MW	MW	GLO	P06	uniform	0.097	1.81	0	0.01	MW	0	50600	0	7510	805	0	506000	0	5760	0	0	0	0	0	2516	0	0	0	0	0	1184	0	0	0	0	0	4420	0	0	0	0	0	0	0	0	6070	0
hard coal power plant, 500MW	power plant	hard coal	>300 MW	MW	GLO	P07	uniform	0.794	1.228	0	0.002	MW	0	0	0	150	3.64	0	1100	0	0	0	0	0	0	0	102	0	0	0	0	0	48	0	0	0	0	0	0	300	0	0	0	0	0	300	0	0	0
lignite power plant, 380MW	power plant	lignite	lignite	MW	RER	P08	uniform	1	1	0	0.00263158	MW	0	2368.42	0	394.737	44.2105	0	28947.4	0	263.158	0	0	0	0	0	178.947	0	0	0	0	0	84.2105	0	0	0	0	0	394.737	0	0	0	0	0	0	0	0	263.158	0
lignite power plant, 380MW	power plant	lignite	lignite	MW	RoW	P09	uniform	1	1	0	0.00263158	MW	0	5921.05	0	1973.68	133.684	0	86842.1	1184.21	1973.68	0	0	0	0	0	536.842	0	0	157.895	0	0	252.632	0	0	0	0	0	789.474	0	0	0	0	0	0	789.474	0	0	0
oil power plant, 500MW	power plant	oil	oil	MW	RoW	P10	uniform	1	1	0	0.002	MW	0	4500	0	1500	101.6	0	66000	900	1500	0	0	0	0	0	408	0	0	120	0	0	192	0	0	0	0	0	600	0	0	0	0	0	0	600	0	0	0
oil power plant, 500MW	power plant	oil	oil	MW	RER	P11	uniform	1	1	0	0.002	MW	0	7200	0	1300	105	0	84400	0	800	0	0	0	0	0	408	0	0	0	0	0	192	0	0	0	0	0	1000	0	0	0	0	0	0	0	0	750	0
cogeneration	power plant	oil & natural gas	oil & natural gas	MW	RoW	P12	uniform	1	1	0	0.012	MW	0	4500	0	5900	161.6	0	154000	900	19500	0	0	0	0	0	3400	0	0	120	0	0	1600	0	0	0	0	0	600	13000	0	0	9.76	63	7.2	7200	42	0	0
offshore platform, natural gas + well	wells	natural gas	offshore	m3	GLO	W05	uniform	0.333	1.667	0	2.24999e-11	cubic meter	0	0.000294749	0	3.41999e-10	9.20248e-08	0	1.4175e-05	6.81748e-09	0	1.7595e-07	6.10873e-07	2.84849e-06	1.35e-06	6.36748e-05	3.87089e-06	1.8225e-05	1.35e-05	4.04999e-06	1.35e-08	6.74998e-07	1.8216e-06	1.6425e-06	8.52748e-09	0	0	0	0	0	0	0	0	0	0	0	0	0	0
offshore platform, petroleum + well	wells	oil	offshore	kg	GLO	W06	uniform	0.333	1.667	0	4.07234e-11	kilogram	0	4.64247e-05	0	3.5185e-10	2.50042e-08	0	2.56558e-05	7.04515e-09	3.05833e-07	2.93209e-07	1.10564e-06	5.15559e-06	2.44341e-06	0	0	3.2986e-05	2.44341e-05	7.33022e-06	2.44341e-08	0	5.53839e-06	0	8.79626e-09	0	0	0	0	0	0	0	0	0	0	0	0	0	0
onshore natural gas field infrastructure + well	wells	natural gas	onshore	m3	GLO	W07	uniform	0.333	1.667	0	3.00621e-10	cubic meter	0	0	0	0	0	0	0.000640323	0	0	0	8.16186e-06	3.80586e-05	1.80373e-05	0	0	0.000243503	0.000180373	5.41118e-05	1.80373e-07	0	0	0	0	0	0	0	0	0	0	0	0	0	0	0	0	0	0
onshore petroleum field infrastructure + well	wells	oil	onshore	kg	GLO	W08	uniform	0.333	1.667	0	4.93673e-09	kilogram	0	0	0	0	0	0	0.00666459	0	0	0	0.000134032	0.00062499	0.000296204	0	0	0.00399875	0.00296204	0.000888611	2.96204e-06	0	0	0	0	0	0	0	0	0	0	0	0	0	0	0	0	0	0
[truncated: 25 more columns]

## Sheet: LCI_sigma
name	ID	type	fuel	class	unit	location	plywood [cubic meter]	steel, low-alloyed, hot rolled [kilogram]	synthetic rubber [kilogram]	copper, cathode [kilogram]	concrete, normal strength [cubic meter]	sawnwood, hardwood, raw, dried (u=20%) [cubic meter]	reinforcing steel [kilogram]	cast iron [kilogram]	steel, chromium steel 18/8, hot rolled [kilogram]	zinc [kilogram]	chemical, organic [kilogram]	chemical, inorganic [kilogram]	activated bentonite [kilogram]	tap water [kilogram]	aluminium, wrought alloy [kilogram]	barite [kilogram]	cement, Portland [kilogram]	lubricating oil [kilogram]	lignite [kilogram]	polyvinylchloride, bulk polymerised [kilogram]	aluminium, cast alloy [kilogram]	epoxy resin, liquid [kilogram]	silicon, metallurgical grade [kilogram]	gravel, round [kilogram]	sand [kilogram]	pitch [kilogram]	cement, unspecified [kilogram]	polyethylene, high density, granulate [kilogram]	polyethylene, low density, granulate [kilogram]	unreinforced concrete, 15MPa [cubic meter]	building, multi-storey [cubic meter]	chromium [kilogram]	nickel, class 1 [kilogram]	cobalt [kilogram]	stone wool, packed [kilogram]	ceramic tile [kilogram]	stone wool [kilogram]	Rubber	Cr	Wood	Chemicals	Water	PE
mine infrastructure, open cast, hard coal	M01	coal mine	hard coal	surface	unit	GLO	0.547723	0.547723	0.547723	0.547723	0.547723	0	0.547723	0	0	0	0	0	0	0	0	0	0	0	0	0	0	0	0	0	0	0	0	0	0	0	0	0	0	0	0	0	0	0.547723	0	0.547723	0	0	0
mine infrastructure, open cast, lignite	M02	coal mine	lignite	surface	unit	RoW	0.349285	0.349285	0	0.349285	0.349285	0	0.349285	0	0	0	0	0	0	0	0	0	0	0	0	0	0	0	0	0	0	0	0	0	0	0	0	0	0	0	0	0	0	0	0	0.349285	0	0	0
mine infrastructure, open cast, lignite	M03	coal mine	lignite	surface	unit	RER	0.34641	0.34641	0	0.34641	0.34641	0	0.34641	0	0	0	0	0	0	0	0	0	0	0	0	0	0	0	0	0	0	0	0	0	0	0	0	0	0	0	0	0	0	0	0	0.34641	0	0	0
mine infrastructure, underground, lignite	M04	coal mine	lignite	underground	unit	RoW	0.547723	0.806226	0	0.806226	0.547723	0.547723	0.547723	0	0	0	0	0	0	0	0	0	0	0	0	0	0	0	0	0	0	0	0	0	0	0	0	0	0	0	0	0	0	0	0	0.547723	0	0	0
mine infrastructure, underground, lignite	M05	coal mine	lignite	underground	unit	RER	0.547723	0.806226	0	0.806226	0.547723	0.547723	0.547723	0	0	0	0	0	0	0	0	0	0	0	0	0	0	0	0	0	0	0	0	0	0	0	0	0	0	0	0	0	0	0	0	0.547723	0	0	0
mine infrastructure, underground & surface, lignite	M06	coal mine	lignite	underground & surface	unit	RoW	0.547723	0.806226	0	0.806226	0.547723	0.547723	0.547723	0	0	0	0	0	0	0	0	0	0	0	0	0	0	0	0	0	0	0	0	0	0	0	0	0	0	0	0	0	0	0	0	0.547723	0	0	0
mine infrastructure, underground & surface, lignite	M07	coal mine	lignite	underground & surface	unit	RER	0.547723	0.806226	0	0.806226	0.547723	0.547723	0.547723	0	0	0	0	0	0	0	0	0	0	0	0	0	0	0	0	0	0	0	0	0	0	0	0	0	0	0	0	0	0	0	0	0.547723	0	0	0
mine infrastructure, underground, hard coal	M08	coal mine	hard coal	underground	unit	CN	0.547723	0.806226	0	0.806226	0.547723	0.547723	0.547723	0	0	0	0	0	0	0	0	0	0	0	0	0	0	0	0	0	0	0	0	0	0	0	0	0	0	0	0	0	0	0	0	0.547723	0	0	0
mine infrastructure, underground, hard coal	M09	coal mine	hard coal	underground	unit	RoW	0.547723	0.806226	0	0.806226	0.547723	0.547723	0.547723	0	0	0	0	0	0	0	0	0	0	0	0	0	0	0	0	0	0	0	0	0	0	0	0	0	0	0	0	0	0	0	0	0.547723	0	0	0
mine infrastructure, refuse, hard coal	M10	coal mine	hard coal	refuse	unit	CN	0.547723	0.547723	0.547723	0.547723	0.547723	0	0.547723	0	0	0	0	0	0	0	0	0	0	0	0	0	0	0	0	0	0	0	0	0	0	0	0	0	0	0	0	0	0	0.547723	0	0.547723	0	0	0
mine infrastructure, refuse, hard coal	M11	coal mine	hard coal	refuse	unit	RoW	0.547723	0.547723	0.547723	0.547723	0.547723	0	0.547723	0	0	0	0	0	0	0	0	0	0	0	0	0	0	0	0	0	0	0	0	0	0	0	0	0	0	0	0	0	0	0.547723	0	0.547723	0	0	0
mine infrastructure, underground & surface, hard coal	M12	coal mine	hard coal	underground & surface	unit	CN	0.547723	0.806226	0.547723	0.806226	0.547723	0.547723	0.547723	0	0	0	0	0	0	0	0	0	0	0	0	0	0	0	0	0	0	0	0	0	0	0	0	0	0	0	0	0	0	0.547723	0	0.547723	0	0	0
mine infrastructure, underground & surface, hard coal	M13	coal mine	hard coal	underground & surface	unit	RoW	0.547723	0.806226	0.547723	0.806226	0.547723	0.547723	0.547723	0	0	0	0	0	0	0	0	0	0	0	0	0	0	0	0	0	0	0	0	0	0	0	0	0	0	0	0	0	0	0.547723	0	0.547723	0	0	0
pipeline, natural gas, high pressure distribution network	P01	pipeline	natural gas	distribution network	kilometer	RoW	0	0	0	0	0	0	0.104881	0.104881	0	0	0	0	0	0	0	0	0	0	0	0	0	0	0	0	0.104881	0.104881	0.104881	0.104881	0.104881	0.104881	0.556776	0	0	0	0	0	0	0	0	0	0	0	0.104881
pipeline, natural gas, high pressure distribution network	P02	pipeline	natural gas	distribution network	kilometer	CH	0	0	0	0	0.304302	0	0.304302	0.304302	0	0	0	0	0	0	0	0	0	0	0	0	0	0	0	0	0.304302	0.304302	0.304302	0.304302	0.304302	0	0.576715	0	0	0	0	0	0	0	0	0	0	0	0.304302
pipeline, natural gas, high pressure distribution network	P03	pipeline	natural gas	distribution network	kilometer	Europe without Switzerland	0	0	0	0	0.301164	0	0.301164	0.301164	0	0	0	0	0	0	0	0	0	0	0	0	0	0	0	0	0.301164	0.301164	0.301164	0.301164	0.301164	0	0.575065	0	0	0	0	0	0	0	0	0	0	0	0.301164
pipeline, natural gas, long distance, high capacity, offshore	P04	pipeline	natural gas	high capacity	kilometer	GLO	0	0	0	1.18659	0.169115	0	0.102956	1.18659	0	1.18659	0	0	0	0	0	0	0	0	0	0	1.18659	0	1.18659	0	0	0	0	0	0	0	0	0	0	0	0	0	0	0	0	0	0	0	0
pipeline, natural gas, long distance, high capacity, onshore	P05	pipeline	natural gas	high capacity	kilometer	GLO	0	0	0	0	0	0	0.102956	0	0	0	0	0	0	0	0	0	0	0	0	0	0	0	0	0	0.169115	0.169115	0	0	0.169115	0	0	0	0	0	0	0	0	0	0	0	0	0	0.169115
pipeline, natural gas, long distance, low capacity, onshore	P06	pipeline	natural gas	low capacity	kilometer	GLO	0	0	0	0	0	0	0.102956	0	0	0	0	0	0	0	0	0	0	0	0	0	0	0	0	0	0.169115	0.169115	0	0	0.169115	0	0	0	0	0	0	0	0	0	0	0	0	0	0.169115
pipeline, natural gas, low pressure distribution network	P07	pipeline	natural gas	distribution network	kilometer	RoW	0	0	0	0	0	0	0.104881	0.104881	0	0	0	0	0	0	0	0	0	0	0	0	0	0	0	0.104881	0.104881	0.104881	0.104881	0.104881	0.104881	0.104881	0.556776	0	0	0	0	0	0	0	0	0	0	0	0.104881
pipeline, natural gas, low pressure distribution network	P08	pipeline	natural gas	distribution network	kilometer	CH	0	0	0	0	0.269444	0	0.269444	0.269444	0	0	0	0	0	0	0	0	0	0	0	0	0	0	0	0.269444	0.269444	0.269444	0.269444	0.269444	0.269444	0	0.576715	0	0	0	0	0	0	0	0	0	0	0	0.269444
pipeline, petroleum	P09	pipeline	oil	onshore & offshore	kilometer	RoW	0	0.103441	0	0	0	0	0.103441	0	0	0	0	0	0	0	0	0	0	0	0	0	0	0	0	0	0.103441	0	0	0	0	0	0	0	0	0	0	0	0	0	0	0	0	0	0
pipeline, petroleum	P10	pipeline	oil	onshore & offshore	kilometer	RER	0	0.11225	0	0	0	0	0.11225	0	0	0	0	0	0	0	0	0	0	0	0	0	0	0	0	0	0.11225	0	0	0	0	0	0	0	0	0	0	0	0	0	0	0	0	0	0
pipeline, petroleum, offshore	P11	pipeline	oil	offshore	kilometer	GLO	0	0.143875	0	1.18659	0.143875	0	0.143875	1.18659	0	1.18659	0	0	0	0	0	0	0	0	0	0	1.18659	0	1.18659	0	0.143875	0.143875	0	0	0	0	0	0	0	0	0	0	0	0	0	0	0	0	0
offshore platform, natural gas	W01	wells	natural gas	offshore	unit	GLO	0	0.144222	0	1.18659	0.144222	0	0	1.18659	0	0.144222	0	0	0	0.148324	0.144222	0	0	0	0	0.144222	0.144222	0.309879	1.18659	0	0	0	0	0	0	0	0	0	0	0	0	0	0	0	0	0	0	0.148324	0
offshore platform, petroleum	W02	wells	petroleum	offshore	unit	GLO	0	0.0538516	0	1.18659	0.0538516	0	0	1.18659	0.0538516	1.18659	0	0	0	0	0	0	0	0	0	0	1.18659	0	1.18659	0	0	0	0	0	0	0	0	0	0	0	0	0	0	0	0	0	0	0	0
offshore well, oil/gas	W01	wells	natural gas	offshore	meter	GLO	0	0	0	0	0	0	0.34641	0	0	0	0.806226	1.15326	0.34641	0	0	0.806226	0.34641	0.34641	0.34641	0	0	0	0	0	0	0	0	0	0	0	0	0	0	0	0	0	0	0	0	0	1.15326	0	0
offshore well, oil/gas	W02	wells	petroleum	offshore	meter	GLO	0	0	0	0	0	0	0.34641	0	0	0	0.806226	1.15326	0.34641	0	0	0.806226	0.34641	0.34641	0.34641	0	0	0	0	0	0	0	0	0	0	0	0	0	0	0	0	0	0	0	0	0	1.15326	0	0
onshore natural gas field infrastructure	W03	wells	natural gas	onshore	unit	GLO	0	0	0	0	0	0	0.20025	0	0	0	0	0	0	0	0	0	0	0	0	0	0	0	0	0	0	0	0	0	0	0	0	0	0	0	0	0	0	0	0	0	0	0	0
onshore petroleum field infrastructure	W04	wells	petroleum	onshore	unit	GLO	0	0	0	0	0	0	0.126886	0	0	0	0	0	0	0	0	0	0	0	0	0	0	0	0	0	0	0	0	0	0	0	0	0	0	0	0	0	0	0	0	0	0	0	0
onshore well, oil/gas	W03	wells	natural gas	onshore	meter	GLO	0	0	0	0	0	0	0.34641	0	0	0	0.806226	1.15326	0.34641	0	0	0.806226	0.34641	0.34641	0.34641	0	0	0	0	0	0	0	0	0	0	0	0	0	0	0	0	0	0	0	0	0	1.15326	0	0
onshore well, oil/gas	W04	wells	petroleum	onshore	meter	GLO	0	0	0	0	0	0	0.34641	0	0	0	0.806226	1.15326	0.34641	0	0	0.806226	0.34641	0.34641	0.34641	0	0	0	0	0	0	0	0	0	0	0	0	0	0	0	0	0	0	0	0	0	1.15326	0	0
gas power plant, 100MW electrical	P01	power plant	natural gas	standard	unit	RER	0	0	0	0.549545	0.549545	0	0.549545	0	0	0	0	0	0	0	0.549545	0	0	0	0	0	0.549545	0	0	0	0	0	0	0	0.549545	0	0	0	0	0	0.549545	0	0	0	0	0	0	0	0.549545
gas power plant, 100MW electrical	P02	power plant	natural gas	standard	unit	RoW	0	0	0	0.547723	0.547723	0	0.547723	0	0	0	0	0	0	0	0.547723	0	0	0	0	0	0.547723	0	0	0	0	0	0	0	0.547723	0	0	0	0	0	0.547723	0	0	0	0	0	0	0	0.547723
gas power plant, 300MW electrical	P03	power plant	natural gas	standard	unit	GLO	0	0	0	0.678233	0.678233	0	0.678233	0	0	0	0	0	0	0	0.678233	0	0	0	0	0	0.678233	0	0	0	0	0	0	0	0.678233	0	0	0	0	0	0.678233	0	0	0	0	0	0	0	0.678233
gas power plant, combined cycle, 400MW electrical	P04	power plant	natural gas	combined cycle	unit	RoW	0	0	0	0.547723	0.547723	0	0.547723	0	0.547723	0	0	0	0	0	0.547723	0	0	0	0	0	0.547723	0	0	0	0	0	0	0	0.547723	0	0	0.547723	0.547723	0.547723	0.547723	0.547723	0	0	0.547723	0	0	0	0.547723
gas power plant, combined cycle, 400MW electrical	P05	power plant	natural gas	combined cycle	unit	RER	0	0	0	0.549545	0.549545	0	0.549545	0	0.549545	0	0	0	0	0	0.549545	0	0	0	0	0	0.549545	0	0	0	0	0	0	0	0.549545	0	0	0.549545	0.549545	0.549545	0.549545	0.549545	0	0	0.549545	0	0	0	0.549545
hard coal power plant, 100MW	P06	power plant	hard coal	<300 MW	unit	GLO	0	0.34641	0	0.34641	0.34641	0	0.34641	0	0.34641	0	0	0	0	0	0.34641	0	0	0	0	0	0.34641	0	0	0	0	0	0	0.34641	0	0	0	0	0	0	0	0	0.34641	0	0	0	0	0	0.34641
hard coal power plant, 500MW	P07	power plant	hard coal	>300 MW	unit	GLO	0	0.34641	0	0.34641	0.34641	0	0.34641	0	0.34641	0	0	0	0	0	0.34641	0	0	0	0	0	0.34641	0	0	0	0	0	0	0.34641	0	0	0	0	0	0	0	0	0.34641	0	0	0	0	0	0.34641
lignite power plant, 380MW	P08	power plant	lignite	lignite	unit	RER	0	0.349285	0	0.349285	0.349285	0	0.349285	0	0.349285	0	0	0	0	0	0.349285	0	0	0	0	0	0.349285	0	0	0	0	0	0	0.349285	0	0	0	0	0	0	0	0	0.349285	0	0	0	0	0	0.349285
lignite power plant, 380MW	P09	power plant	lignite	lignite	unit	RoW	0	0.34641	0	0.34641	0.34641	0	0.34641	0	0.34641	0	0	0	0	0	0.34641	0	0	0	0	0	0.34641	0	0	0	0	0	0	0.34641	0	0	0	0	0	0	0	0	0.34641	0	0	0	0	0	0.34641
oil power plant, 500MW	P10	power plant	oil	oil	unit	RoW	0	0.128841	0	0.128841	0.128841	0	0.128841	0.128841	0.128841	0	0	0	0	0	0.128841	0	0	0.369594	0	0	0.128841	0	0	0	0	0	0	0.128841	0	0	0	0	0	0	0.128841	0	0	0	0	0	0	0	0.128841
oil power plant, 500MW	P11	power plant	oil	oil	unit	RER	0	0.12083	0	0.12083	0.12083	0	0.12083	0.12083	0.12083	0	0	0	0	0	0.12083	0	0	0.366879	0	0	0.12083	0	0	0	0	0	0	0.12083	0	0	0	0	0	0	0.12083	0	0	0	0	0	0	0	0.12083
cogeneration	P12	power plant	oil & natural gas	oil & natural gas	unit	RoW	0	0.128841	0	0.549545	0.549545	0	0.549545	0.128841	0.128841	0	0	0	0	0	0.549545	0	0	0.369594	0	0	0.549545	0	0	0	0	0	0	0.128841	0.549545	0	0	0	0	0	0.549545	0	0	0	0	0	0	0	0.549545
offshore platform, natural gas + well	W05	wells	natural gas	offshore	unit	GLO	0	0.144222	0	1.18659	0.144222	0	0.34641	1.18659	0	0.144222	0.806226	1.15326	0.34641	0.148324	0.144222	0.806226	0.34641	0.34641	0.34641	0.144222	0.144222	0.309879	1.18659	0	0	0	0	0	0	0	0	0	0	0	0	0	0	0	0	0	1.15326	0.148324	0
offshore platform, petroleum + well	W06	wells	oil	offshore	unit	GLO	0	0.0538516	0	1.18659	0.0538516	0	0.34641	1.18659	0.0538516	1.18659	0.806226	1.15326	0.34641	0	0	0.806226	0.34641	0.34641	0.34641	0	1.18659	0	1.18659	0	0	0	0	0	0	0	0	0	0	0	0	0	0	0	0	0	1.15326	0	0
onshore natural gas field infrastructure + well	W07	wells	natural gas	onshore	unit	GLO	0	0	0	0	0	0	0.104881	0.104881	0	0	0	0	0	0	0	0	0	0	0	0	0	0	0	0.104881	0.169115	0.169115	0.104881	0.104881	0.169115	0.104881	0.556776	0	0	0	0	0	0	0	0	0	0	0	0.169115
onshore petroleum field infrastructure + well	W08	wells	oil	onshore	unit	GLO	0	0	0	0	0	0	0.34641	0	0	0	0.806226	1.15326	0.34641	0	0	0.806226	0.34641	0.34641	0.34641	0	0	0	0	0	0	0	0	0	0	0	0	0	0	0	0	0	0	0	0	0	1.15326	0	0
[truncated: 20 more columns]

## Sheet: densities
material	density uncertainty type	min	mode	max	sigma	remark
plywood [cubic meter]	uniform	400	550	700		assumed
sawnwood, hardwood, raw, dried (u=20%) [cubic meter]	uniform	350	560	770		assumed
concrete, normal strength [cubic meter]	normal		2346.4		69.6	ecoinvent v3.9.1
unreinforced concrete, 15MPa [cubic meter]	normal		2346.4		69.6	ecoinvent v3.9.1
Wood	uniform	350	560	770		assumed
Concrete	normal		2346.4		69.6	ecoinvent v3.9.1
