# Supplementary material for: Digesting fossil infrastructure for cleaner energy transitions
Source: Research Square preprint supplement (doi:10.21203/rs.3.rs-6346491/v1), 2025-06-06
Supplement: Supplementary file 65 [file lci-hydrogen.xlsx]

## Sheet: hydrogen
Database	hydrogen
Activity	carbon dioxide, captured from atmosphere, with a solvent-based direct air capture system, 1MtCO2, with heat pump heat, and PV electricity, default
code	498d7f210117458d86072882f4448ff6_copy1
comment	Based on a solvent-based DAC facility with annual capture capacity of 1 Mt CO2 and lifetime of 20 years. Qiu, Y., Lamers, P., Daioglou, V. et al. Environmental trade-offs of direct air capture technologies in climate change mitigation toward 2100. Nat Commun 13, 3635 (2022). https://doi.org/10.1038/s41467-022-31146-1The heat source is a heat pump with a COP of 2.9.
location	EUR
reference product	carbon dioxide, captured from atmosphere
source	Qiu, Y., Lamers, P., Daioglou, V. et al. Environmental trade-offs of direct air capture technologies in climate change mitigation toward 2100. Nat Commun 13, 3635 (2022). https://doi.org/10.1038/s41467-022-31146-1
unit	kilogram
worksheet name	inventories.csv
Exchanges
name	amount	database	location	unit	categories	type	reference product
Carbon dioxide, in air	1	biosphere3		kilogram	natural resource::in air	biosphere
carbon dioxide, captured from atmosphere, with a solvent-based direct air capture system, 1MtCO2, with heat pump heat, and PV electricity, default	1	hydrogen	EUR	kilogram		production	carbon dioxide, captured from atmosphere
direct air capture system, solvent-based, 1MtCO2	5e-11	remind - SSP5-NPi - 2025	RER	unit		technosphere	direct air capture system
electricity production, photovoltaic, at 570 kWp open ground, single-Si, default	0.946533	hydrogen	ES	kilowatt hour		technosphere	electricity production, photovoltaic, at 570 kWp open ground, single-Si
market for limestone, crushed, for mill	0.0035	remind - SSP5-NPi - 2025	RoW	kilogram		technosphere	limestone, crushed, for mill
market for potassium hydroxide	0.004	remind - SSP5-NPi - 2025	GLO	kilogram		technosphere	potassium hydroxide
market for tap water	3.437	remind - SSP5-NPi - 2025	Europe without Switzerland	kilogram		technosphere	tap water
treatment of direct air capture system, solvent-based, 1MtCO2	-5e-11	remind - SSP5-NPi - 2025	RER	unit		technosphere	direct air capture system
treatment of limestone residue, inert material landfill	-0.0035	remind - SSP5-NPi - 2025	RoW	kilogram		technosphere	limestone residue
treatment of spent solvent mixture, hazardous waste incineration	-0.004	remind - SSP5-NPi - 2025	Europe without Switzerland	kilogram		technosphere	spent solvent mixture
Activity	carbon dioxide, captured from atmosphere, with a solvent-based direct air capture system, 1MtCO2, with heat pump heat, and PV electricity, steel secondary
code	498d7f210117458d86072882f4448ff6_copy2
comment	Based on a solvent-based DAC facility with annual capture capacity of 1 Mt CO2 and lifetime of 20 years. Qiu, Y., Lamers, P., Daioglou, V. et al. Environmental trade-offs of direct air capture technologies in climate change mitigation toward 2100. Nat Commun 13, 3635 (2022). https://doi.org/10.1038/s41467-022-31146-1The heat source is a heat pump with a COP of 2.9.
location	EUR
reference product	carbon dioxide, captured from atmosphere
source	Qiu, Y., Lamers, P., Daioglou, V. et al. Environmental trade-offs of direct air capture technologies in climate change mitigation toward 2100. Nat Commun 13, 3635 (2022). https://doi.org/10.1038/s41467-022-31146-1
unit	kilogram
worksheet name	inventories.csv
Exchanges
name	amount	database	location	unit	categories	type	reference product
Carbon dioxide, in air	1	biosphere3		kilogram	natural resource::in air	biosphere
carbon dioxide, captured from atmosphere, with a solvent-based direct air capture system, 1MtCO2, with heat pump heat, and PV electricity, steel secondary	1	hydrogen	EUR	kilogram		production	carbon dioxide, captured from atmosphere
direct air capture system, solvent-based, 1MtCO2	5e-11	remind - SSP5-NPi - 2025	RER	unit		technosphere	direct air capture system
electricity production, photovoltaic, at 570 kWp open ground, single-Si, secondary steel	0.946533	hydrogen	ES	kilowatt hour		technosphere	electricity production, photovoltaic, at 570 kWp open ground, single-Si
market for limestone, crushed, for mill	0.0035	remind - SSP5-NPi - 2025	RoW	kilogram		technosphere	limestone, crushed, for mill
market for potassium hydroxide	0.004	remind - SSP5-NPi - 2025	GLO	kilogram		technosphere	potassium hydroxide
market for tap water	3.437	remind - SSP5-NPi - 2025	Europe without Switzerland	kilogram		technosphere	tap water
treatment of direct air capture system, solvent-based, 1MtCO2	-5e-11	remind - SSP5-NPi - 2025	RER	unit		technosphere	direct air capture system
treatment of limestone residue, inert material landfill	-0.0035	remind - SSP5-NPi - 2025	RoW	kilogram		technosphere	limestone residue
treatment of spent solvent mixture, hazardous waste incineration	-0.004	remind - SSP5-NPi - 2025	Europe without Switzerland	kilogram		technosphere	spent solvent mixture
Activity	electricity production, photovoltaic, at 570 kWp open ground, single-Si, default
code	0e61a46d063049448718cacf90762522_copy1
comment	Electricity from a photovoltaic installation with a capacity of 570 kWp and a life time of 30 years installed in 2008 in ES and operated by Edisun Power Iberia S.A. Module efficiency updated based on Fraunhofer ISE Photovoltaics Report from 14 November 2019. Specific annual yield adjusted based on Breyer & Schmid (2010) (calculated with population-density weighted solar irradiation of fixed tilte…
location	ES
reference product	electricity production, photovoltaic, at 570 kWp open ground, single-Si
source	Fthenakis, V., Leccisi, E., & Frischknecht, Rolf; Stolz, Philippe; Krebs, Luana; de Wild-Scholten, Mariska; Sinha, P. (2021). Life Cycle Inventories and Life Cycle Assessments of Photovoltaic Systems 2020 Task 12 PV Sustainability. Progress in Photovoltaics: Research and Applications, 29(10), 1068–1077. www.iea-pvps.org
unit	kilowatt hour
worksheet name	inventories.csv
Exchanges
name	amount	database	location	unit	categories	type	reference product
Energy, solar, converted	3.8503	biosphere3		megajoule	natural resource::in air	biosphere
Heat, waste	0.25027	biosphere3		megajoule	air::urban air close to ground	biosphere
electricity production, photovoltaic, at 570 kWp open ground, single-Si, default	1	hydrogen	ES	kilowatt hour		production	electricity production, photovoltaic, at 570 kWp open ground, single-Si
market for tap water	0.0027427	remind - SSP2-NPi - 2025	Europe without Switzerland	kilogram		technosphere	tap water
photovoltaic open ground installation, 570 kWp, single-Si, on open ground, default	4.3306e-08	Renewables_SSP2-NPi_2025	RER	unit		technosphere	photovoltaic open ground installation, 570 kWp, single-Si, on open ground
treatment of wastewater, average, wastewater treatment	-2.4684e-06	remind - SSP2-NPi - 2025	CH	cubic meter		technosphere	wastewater, average
Activity	electricity production, photovoltaic, at 570 kWp open ground, single-Si, secondary steel
code	0e61a46d063049448718cacf90762522_copy2
comment	Electricity from a photovoltaic installation with a capacity of 570 kWp and a life time of 30 years installed in 2008 in ES and operated by Edisun Power Iberia S.A. Module efficiency updated based on Fraunhofer ISE Photovoltaics Report from 14 November 2019. Specific annual yield adjusted based on Breyer & Schmid (2010) (calculated with population-density weighted solar irradiation of fixed tilte…
location	ES
reference product	electricity production, photovoltaic, at 570 kWp open ground, single-Si
source	Fthenakis, V., Leccisi, E., & Frischknecht, Rolf; Stolz, Philippe; Krebs, Luana; de Wild-Scholten, Mariska; Sinha, P. (2021). Life Cycle Inventories and Life Cycle Assessments of Photovoltaic Systems 2020 Task 12 PV Sustainability. Progress in Photovoltaics: Research and Applications, 29(10), 1068–1077. www.iea-pvps.org
unit	kilowatt hour
worksheet name	inventories.csv
Exchanges
name	amount	database	location	unit	categories	type	reference product
Energy, solar, converted	3.8503	biosphere3		megajoule	natural resource::in air	biosphere
Heat, waste	0.25027	biosphere3		megajoule	air::urban air close to ground	biosphere
electricity production, photovoltaic, at 570 kWp open ground, single-Si, secondary steel	1	hydrogen	ES	kilowatt hour		production	electricity production, photovoltaic, at 570 kWp open ground, single-Si
market for tap water	0.0027427	remind - SSP2-NPi - 2025	Europe without Switzerland	kilogram		technosphere	tap water
photovoltaic open ground installation, 570 kWp, single-Si, on open ground, steel, secondary	4.3306e-08	Renewables_SSP2-NPi_2025	RER	unit		technosphere	photovoltaic open ground installation, 570 kWp, single-Si, on open ground
treatment of wastewater, average, wastewater treatment	-2.4684e-06	remind - SSP2-NPi - 2025	CH	cubic meter		technosphere	wastewater, average
Activity	hydrogen production, gaseous, 1 bar, from SOEC electrolysis, PV, default
code	e6f8a66fd1414ff2b1de07269a972bf6_copy1
comment	1 kg H2 produced using a SOEC electrolyzer. Original source: 1 MW SOEC electrolyzer based on Niklas Gerloff, Comparative Life-Cycle-Assessment analysis of three major water electrolysis technologies while applying various energy scenarios for a greener hydrogen production, Journal of Energy Storage, Volume 43, 2021, https://doi.org/10.1016/j.est.2021.102759. Further refined (with respect to stack…
location	World
reference product	hydrogen, gaseous, 1 bar
unit	kilogram
worksheet name	inventories.csv
Exchanges
name	amount	database	location	unit	categories	type	reference product
Occupation, industrial area	0.000105932	biosphere3		square meter-year	natural resource::land	biosphere
Oxygen	8	biosphere3		kilogram	air	biosphere
Transformation, from industrial area	5.29661e-06	biosphere3		square meter	natural resource::land	biosphere
Transformation, to industrial area	5.29661e-06	biosphere3		square meter	natural resource::land	biosphere
hydrogen production, gaseous, 1 bar, from SOEC electrolysis, PV, default	1	hydrogen	World	kilogram		production	hydrogen, gaseous, 1 bar
electricity production, photovoltaic, at 570 kWp open ground, single-Si, default	42.0167	hydrogen	ES	kilowatt hour		technosphere	electricity production, photovoltaic, at 570 kWp open ground, single-Si
electrolyzer production, 1MWe, SOEC, Balance of Plant	2.64831e-07	remind - SSP2-NPi - 2025	RER	unit		technosphere	electrolyzer, 1MWe, SOEC, Balance of Plant
electrolyzer production, 1MWe, SOEC, Stack	2.11864e-06	remind - SSP2-NPi - 2025	RER	unit		technosphere	electrolyzer, 1MWe, SOEC, Stack
market for water, deionised	14	remind - SSP2-NPi - 2025	RoW	kilogram		technosphere	water, deionised
treatment of fuel cell balance of plant, 1MWe, SOEC	-2.64831e-07	remind - SSP2-NPi - 2025	RER	unit		technosphere	used fuel cell balance of plant, 1MWe, SOEC
treatment of fuel cell stack, 1MWe, SOEC	-2.11864e-06	remind - SSP2-NPi - 2025	RER	unit		technosphere	used fuel cell stack, 1MWe, SOEC
Activity	hydrogen production, gaseous, 1 bar, from SOEC electrolysis, PV, secondary steel
code	e6f8a66fd1414ff2b1de07269a972bf6_copy2
comment	1 kg H2 produced using a SOEC electrolyzer. Original source: 1 MW SOEC electrolyzer based on Niklas Gerloff, Comparative Life-Cycle-Assessment analysis of three major water electrolysis technologies while applying various energy scenarios for a greener hydrogen production, Journal of Energy Storage, Volume 43, 2021, https://doi.org/10.1016/j.est.2021.102759. Further refined (with respect to stack…
location	World
reference product	hydrogen, gaseous, 1 bar
unit	kilogram
worksheet name	inventories.csv
Exchanges
name	amount	database	location	unit	categories	type	reference product
Occupation, industrial area	0.000105932	biosphere3		square meter-year	natural resource::land	biosphere
Oxygen	8	biosphere3		kilogram	air	biosphere
Transformation, from industrial area	5.29661e-06	biosphere3		square meter	natural resource::land	biosphere
Transformation, to industrial area	5.29661e-06	biosphere3		square meter	natural resource::land	biosphere
hydrogen production, gaseous, 1 bar, from SOEC electrolysis, PV, secondary steel	1	hydrogen	World	kilogram		production	hydrogen, gaseous, 1 bar
electricity production, photovoltaic, at 570 kWp open ground, single-Si, secondary steel	42.0167	hydrogen	ES	kilowatt hour		technosphere	electricity production, photovoltaic, at 570 kWp open ground, single-Si
electrolyzer production, 1MWe, SOEC, Balance of Plant	2.64831e-07	remind - SSP2-NPi - 2025	RER	unit		technosphere	electrolyzer, 1MWe, SOEC, Balance of Plant
electrolyzer production, 1MWe, SOEC, Stack	2.11864e-06	remind - SSP2-NPi - 2025	RER	unit		technosphere	electrolyzer, 1MWe, SOEC, Stack
market for water, deionised	14	remind - SSP2-NPi - 2025	RoW	kilogram		technosphere	water, deionised
treatment of fuel cell balance of plant, 1MWe, SOEC	-2.64831e-07	remind - SSP2-NPi - 2025	RER	unit		technosphere	used fuel cell balance of plant, 1MWe, SOEC
treatment of fuel cell stack, 1MWe, SOEC	-2.11864e-06	remind - SSP2-NPi - 2025	RER	unit		technosphere	used fuel cell stack, 1MWe, SOEC
Activity	hydrogen production, gaseous, 20 bar, from AEC electrolysis, PV, default
code	93acb7c8887e422dbec8ab997dbf9dc6_copy2
comment	1 kg H2 produced using a AEC electrolyzer. Original source: 1 MW AEC electrolyzer based on Niklas Gerloff, Comparative Life-Cycle-Assessment analysis of three major water electrolysis technologies while applying various energy scenarios for a greener hydrogen production, Journal of Energy Storage, Volume 43, 2021, https://doi.org/10.1016/j.est.2021.102759. Further refined (with respect to stack a…
location	World
reference product	hydrogen, gaseous, 20 bar
unit	kilogram
worksheet name	inventories.csv
Exchanges
name	amount	database	location	unit	categories	type	reference product
Occupation, industrial area	0.000774793	biosphere3		square meter-year	natural resource::land	biosphere
Oxygen	8	biosphere3		kilogram	air	biosphere
Transformation, from industrial area	2.81743e-05	biosphere3		square meter	natural resource::land	biosphere
Transformation, to industrial area	2.81743e-05	biosphere3		square meter	natural resource::land	biosphere
hydrogen production, gaseous, 20 bar, from AEC electrolysis, PV, default	1	hydrogen	World	kilogram		production	hydrogen, gaseous, 20 bar
electricity production, photovoltaic, at 570 kWp open ground, single-Si, default	51.25	hydrogen	ES	kilowatt hour		technosphere	electricity production, photovoltaic, at 570 kWp open ground, single-Si
electrolyzer production, 1MWe, AEC, Balance of Plant	2.34786e-07	remind - SSP2-NPi - 2025	RER	unit		technosphere	electrolyzer, 1MWe, AEC, Balance of Plant
electrolyzer production, 1MWe, AEC, Stack	9.39144e-07	remind - SSP2-NPi - 2025	RER	unit		technosphere	electrolyzer, 1MWe, AEC, Stack
market for potassium hydroxide	0.0037	remind - SSP2-NPi - 2025	GLO	kilogram		technosphere	potassium hydroxide
market for water, deionised	14	remind - SSP2-NPi - 2025	RoW	kilogram		technosphere	water, deionised
treatment of fuel cell balance of plant, 1MWe, AEC	-2.34786e-07	remind - SSP2-NPi - 2025	RER	unit		technosphere	used fuel cell balance of plant, 1MWe, AEC
treatment of fuel cell stack, 1MWe, AEC	-9.39144e-07	remind - SSP2-NPi - 2025	RER	unit		technosphere	used fuel cell stack, 1MWe, AEC
Activity	hydrogen production, gaseous, 20 bar, from AEC electrolysis, PV, secondary steel
code	93acb7c8887e422dbec8ab997dbf9dc6_copy1
comment	1 kg H2 produced using a AEC electrolyzer. Original source: 1 MW AEC electrolyzer based on Niklas Gerloff, Comparative Life-Cycle-Assessment analysis of three major water electrolysis technologies while applying various energy scenarios for a greener hydrogen production, Journal of Energy Storage, Volume 43, 2021, https://doi.org/10.1016/j.est.2021.102759. Further refined (with respect to stack a…
location	World
reference product	hydrogen, gaseous, 20 bar
unit	kilogram
worksheet name	inventories.csv
Exchanges
name	amount	database	location	unit	categories	type	reference product
Occupation, industrial area	0.000774793	biosphere3		square meter-year	natural resource::land	biosphere
Oxygen	8	biosphere3		kilogram	air	biosphere
Transformation, from industrial area	2.81743e-05	biosphere3		square meter	natural resource::land	biosphere
Transformation, to industrial area	2.81743e-05	biosphere3		square meter	natural resource::land	biosphere
hydrogen production, gaseous, 20 bar, from AEC electrolysis, PV, secondary steel	1	hydrogen	World	kilogram		production	hydrogen, gaseous, 20 bar
electricity production, photovoltaic, at 570 kWp open ground, single-Si, secondary steel	51.25	hydrogen	ES	kilowatt hour		technosphere	electricity production, photovoltaic, at 570 kWp open ground, single-Si
electrolyzer production, 1MWe, AEC, Balance of Plant	2.34786e-07	remind - SSP2-NPi - 2025	RER	unit		technosphere	electrolyzer, 1MWe, AEC, Balance of Plant
electrolyzer production, 1MWe, AEC, Stack	9.39144e-07	remind - SSP2-NPi - 2025	RER	unit		technosphere	electrolyzer, 1MWe, AEC, Stack
market for potassium hydroxide	0.0037	remind - SSP2-NPi - 2025	GLO	kilogram		technosphere	potassium hydroxide
market for water, deionised	14	remind - SSP2-NPi - 2025	RoW	kilogram		technosphere	water, deionised
treatment of fuel cell balance of plant, 1MWe, AEC	-2.34786e-07	remind - SSP2-NPi - 2025	RER	unit		technosphere	used fuel cell balance of plant, 1MWe, AEC
treatment of fuel cell stack, 1MWe, AEC	-9.39144e-07	remind - SSP2-NPi - 2025	RER	unit		technosphere	used fuel cell stack, 1MWe, AEC
Activity	hydrogen production, gaseous, 30 bar, from PEM electrolysis, PV, default
code	183381caa29a4960bbddcd7a924265cd_copy1
comment	1 kg H2 produced using a PEM electrolyzer. Original source: 1 MW PEM electrolyzer based on Niklas Gerloff, Comparative Life-Cycle-Assessment analysis of three major water electrolysis technologies while applying various energy scenarios for a greener hydrogen production, Journal of Energy Storage, Volume 43, 2021, https://doi.org/10.1016/j.est.2021.102759. Further refined (with respect to stack a…
location	World
reference product	hydrogen, gaseous, 30 bar
unit	kilogram
worksheet name	inventories.csv
Exchanges
name	amount	database	location	unit	categories	type	reference product
Occupation, industrial area	0.000588167	biosphere3		square meter-year	natural resource::land	biosphere
Oxygen	7.74603	biosphere3		kilogram	air	biosphere
Transformation, from industrial area	2.94084e-05	biosphere3		square meter	natural resource::land	biosphere
Transformation, to industrial area	2.94084e-05	biosphere3		square meter	natural resource::land	biosphere
hydrogen production, gaseous, 30 bar, from PEM electrolysis, PV, default	1	hydrogen	World	kilogram		production	hydrogen, gaseous, 30 bar
electricity production, photovoltaic, at 570 kWp open ground, single-Si, default	52.2857	hydrogen	ES	kilowatt hour		technosphere	electricity production, photovoltaic, at 570 kWp open ground, single-Si
electrolyzer production, 1MWe, PEM, Balance of Plant	3.37473e-07	remind - SSP2-NPi - 2025	RER	unit		technosphere	electrolyzer, 1MWe, PEM, Balance of Plant
electrolyzer production, 1MWe, PEM, Stack	1.34989e-06	remind - SSP2-NPi - 2025	RER	unit		technosphere	electrolyzer, 1MWe, PEM, Stack
market for water, deionised	14	remind - SSP2-NPi - 2025	RoW	kilogram		technosphere	water, deionised
treatment of fuel cell balance of plant, 1MWe, PEM	-3.37473e-07	remind - SSP2-NPi - 2025	RER	unit		technosphere	used fuel cell balance of plant, 1MWe, PEM
treatment of fuel cell stack, 1MWe, PEM	-1.34989e-06	remind - SSP2-NPi - 2025	RER	unit		technosphere	used fuel cell stack, 1MWe, PEM
Activity	hydrogen production, gaseous, 30 bar, from PEM electrolysis, PV, secondary steel
code	183381caa29a4960bbddcd7a924265cd_copy2
comment	1 kg H2 produced using a PEM electrolyzer. Original source: 1 MW PEM electrolyzer based on Niklas Gerloff, Comparative Life-Cycle-Assessment analysis of three major water electrolysis technologies while applying various energy scenarios for a greener hydrogen production, Journal of Energy Storage, Volume 43, 2021, https://doi.org/10.1016/j.est.2021.102759. Further refined (with respect to stack a…
location	World
reference product	hydrogen, gaseous, 30 bar
unit	kilogram
worksheet name	inventories.csv
Exchanges
name	amount	database	location	unit	categories	type	reference product
Occupation, industrial area	0.000588167	biosphere3		square meter-year	natural resource::land	biosphere
Oxygen	7.74603	biosphere3		kilogram	air	biosphere
Transformation, from industrial area	2.94084e-05	biosphere3		square meter	natural resource::land	biosphere
Transformation, to industrial area	2.94084e-05	biosphere3		square meter	natural resource::land	biosphere
hydrogen production, gaseous, 30 bar, from PEM electrolysis, PV, secondary steel	1	hydrogen	World	kilogram		production	hydrogen, gaseous, 30 bar
electricity production, photovoltaic, at 570 kWp open ground, single-Si, secondary steel	52.2857	hydrogen	ES	kilowatt hour		technosphere	electricity production, photovoltaic, at 570 kWp open ground, single-Si
electrolyzer production, 1MWe, PEM, Balance of Plant	3.37473e-07	remind - SSP2-NPi - 2025	RER	unit		technosphere	electrolyzer, 1MWe, PEM, Balance of Plant
electrolyzer production, 1MWe, PEM, Stack	1.34989e-06	remind - SSP2-NPi - 2025	RER	unit		technosphere	electrolyzer, 1MWe, PEM, Stack
market for water, deionised	14	remind - SSP2-NPi - 2025	RoW	kilogram		technosphere	water, deionised
treatment of fuel cell balance of plant, 1MWe, PEM	-3.37473e-07	remind - SSP2-NPi - 2025	RER	unit		technosphere	used fuel cell balance of plant, 1MWe, PEM
treatment of fuel cell stack, 1MWe, PEM	-1.34989e-06	remind - SSP2-NPi - 2025	RER	unit		technosphere	used fuel cell stack, 1MWe, PEM
Activity	methanol distillation, hydrogen from electrolysis, CO2 from DAC, default
code	c4419f553a9341aab8620264230f53fc_copy2
comment	Adapted from Comparative well-to-wheel life cycle assessment of OME3–5 synfuel production via the power-to-liquid pathway, Hank et al. 2019
location	EUR
reference product	methanol, purified
source	Comparative well-to-wheel life cycle assessment of OME3–5 synfuel production via the power-to-liquid pathway. Christoph Hank, Lukas Lazar, Franz Mantei, Mohamed Ouda, Robin J. White, Tom Smolinka, Achim Schaadt, Christopher Hebling and Hans-Martin Henning. 2019. https://doi.org/10.1039/C9SE00658C
unit	kilogram
worksheet name	inventories.csv
Exchanges
name	amount	database	location	unit	categories	type	reference product
Carbon dioxide, non-fossil	0.132068	biosphere3		kilogram	air	biosphere
Carbon monoxide, non-fossil	1.66941e-06	biosphere3		kilogram	air	biosphere
methanol distillation, hydrogen from electrolysis, CO2 from DAC, default	1	hydrogen	EUR	kilogram		production	methanol, purified
methanol production facility, construction	12.4568	remind - SSP2-NPi - 2025	RER	unit		technosphere	methanol production facility, construction
methanol synthesis, hydrogen from electrolysis, CO2 from DAC, default	1	hydrogen	EUR	kilogram		technosphere	methanol, unpurified
steam production, as energy carrier, in chemical industry	3.5098	remind - SSP2-NPi - 2025	EUR	megajoule		technosphere	heat, from steam, in chemical industry
Activity	methanol distillation, hydrogen from electrolysis, CO2 from DAC, secondary steel
code	c4419f553a9341aab8620264230f53fc_copy1
comment	Adapted from Comparative well-to-wheel life cycle assessment of OME3–5 synfuel production via the power-to-liquid pathway, Hank et al. 2019
location	EUR
reference product	methanol, purified
source	Comparative well-to-wheel life cycle assessment of OME3–5 synfuel production via the power-to-liquid pathway. Christoph Hank, Lukas Lazar, Franz Mantei, Mohamed Ouda, Robin J. White, Tom Smolinka, Achim Schaadt, Christopher Hebling and Hans-Martin Henning. 2019. https://doi.org/10.1039/C9SE00658C
unit	kilogram
worksheet name	inventories.csv
Exchanges
name	amount	database	location	unit	categories	type	reference product
Carbon dioxide, non-fossil	0.132068	biosphere3		kilogram	air	biosphere
Carbon monoxide, non-fossil	1.66941e-06	biosphere3		kilogram	air	biosphere
methanol distillation, hydrogen from electrolysis, CO2 from DAC, secondary steel	1	hydrogen	EUR	kilogram		production	methanol, purified
methanol production facility, construction	12.4568	remind - SSP2-NPi - 2025	RER	unit		technosphere	methanol production facility, construction
methanol synthesis, hydrogen from electrolysis, CO2 from DAC, secondary steel	1	hydrogen	EUR	kilogram		technosphere	methanol, unpurified
steam production, as energy carrier, in chemical industry	3.5098	remind - SSP2-NPi - 2025	EUR	megajoule		technosphere	heat, from steam, in chemical industry
Activity	methanol supply, produced with hydrogen from Electrolysis, PEM using PV electricity and carbon from DAC, default
code	1df68a48edd04c14af5aa87e6688429e_copy2
comment	This dataset represents the supply of 1 kilogram of methanol. The fuel is distributed by truck over 250 km from regional storage. The methanol is produced by Electrolysis, PEM, with electricity from grid as feedstock. Distribution loss [% output]: 0%. Regional storage loss [% output]: 0. For more information, refer to: Sacchi, R. and Bauer, C. LCA of Power-to-X processes and applications in the r…
location	RER
reference product	methanol, from truck
source	Sacchi, R. and Bauer, C. LCA of Power-to-X processes and applications in the residential sector. Paul Scherrer Institut, 2023.
unit	kilogram
worksheet name	inventories.csv
Exchanges
name	amount	database	location	unit	categories	type	reference product
methanol supply, produced with hydrogen from Electrolysis, PEM using PV electricity and carbon from DAC, default	1	hydrogen	RER	kilogram		production	methanol, from truck
market for liquid storage tank, chemicals, organics	2.63e-10	remind - SSP2-NPi - 2025	GLO	unit		technosphere	liquid storage tank, chemicals, organics
market for transport, freight, lorry, unspecified	0.5	remind - SSP2-NPi - 2025	RER	ton kilometer		technosphere	transport, freight, lorry, unspecified
methanol distillation, hydrogen from electrolysis, CO2 from DAC, default	1	hydrogen	EUR	kilogram		technosphere	methanol, purified
Activity	methanol supply, produced with hydrogen from Electrolysis, PEM using PV electricity and carbon from DAC, secondary steel
code	1df68a48edd04c14af5aa87e6688429e_copy1
comment	This dataset represents the supply of 1 kilogram of methanol. The fuel is distributed by truck over 250 km from regional storage. The methanol is produced by Electrolysis, PEM, with electricity from grid as feedstock. Distribution loss [% output]: 0%. Regional storage loss [% output]: 0. For more information, refer to: Sacchi, R. and Bauer, C. LCA of Power-to-X processes and applications in the r…
location	RER
reference product	methanol, from truck
source	Sacchi, R. and Bauer, C. LCA of Power-to-X processes and applications in the residential sector. Paul Scherrer Institut, 2023.
unit	kilogram
worksheet name	inventories.csv
Exchanges
name	amount	database	location	unit	categories	type	reference product
methanol supply, produced with hydrogen from Electrolysis, PEM using PV electricity and carbon from DAC, secondary steel	1	hydrogen	RER	kilogram		production	methanol, from truck
market for liquid storage tank, chemicals, organics	2.63e-10	remind - SSP2-NPi - 2025	GLO	unit		technosphere	liquid storage tank, chemicals, organics
market for transport, freight, lorry, unspecified	0.5	remind - SSP2-NPi - 2025	RER	ton kilometer		technosphere	transport, freight, lorry, unspecified
methanol distillation, hydrogen from electrolysis, CO2 from DAC, secondary steel	1	hydrogen	EUR	kilogram		technosphere	methanol, purified
Activity	methanol synthesis, hydrogen from electrolysis, CO2 from DAC, default
code	1fc3bd7503c64c9582848c36b6c77424_copy2
comment	Adapted from Comparative well-to-wheel life cycle assessment of OME3–5 synfuel production via the power-to-liquid pathway, Hank et al. 2019
location	EUR
reference product	methanol, unpurified
source	Comparative well-to-wheel life cycle assessment of OME3–5 synfuel production via the power-to-liquid pathway. Christoph Hank, Lukas Lazar, Franz Mantei, Mohamed Ouda, Robin J. White, Tom Smolinka, Achim Schaadt, Christopher Hebling and Hans-Martin Henning. 2019. https://doi.org/10.1039/C9SE00658C
unit	kilogram
worksheet name	inventories.csv
Exchanges
name	amount	database	location	unit	categories	type	reference product
methanol synthesis, hydrogen from electrolysis, CO2 from DAC, default	1	hydrogen	EUR	kilogram		production	methanol, unpurified
carbon dioxide, captured from atmosphere, with a solvent-based direct air capture system, 1MtCO2, with heat pump heat, and PV electricity, default	1.69042	hydrogen	EUR	kilogram		technosphere	carbon dioxide, captured from atmosphere
hydrogen production, gaseous, 30 bar, from PEM electrolysis, PV, default	0.138976	hydrogen	World	kilogram		technosphere	hydrogen, gaseous, 30 bar
market for aluminium oxide, metallurgical	3.96437e-06	remind - SSP2-NPi - 2025	IAI Area, EU27 & EFTA	kilogram		technosphere	aluminium oxide, metallurgical
market for copper oxide	2.11359e-05	remind - SSP2-NPi - 2025	GLO	kilogram		technosphere	copper oxide
market for tap water	68.8196	remind - SSP2-NPi - 2025	Europe without Switzerland	kilogram		technosphere	tap water
market for zinc oxide	7.92873e-06	remind - SSP2-NPi - 2025	GLO	kilogram		technosphere	zinc oxide
market group for electricity, low voltage	0.302895	remind - SSP2-NPi - 2025	EUR	kilowatt hour		technosphere	electricity, low voltage
methanol production facility, construction	12.89	remind - SSP2-NPi - 2025	RER	unit		technosphere	methanol production facility, construction
treatment of wastewater, average, wastewater treatment	-0.0688196	remind - SSP2-NPi - 2025	Europe without Switzerland	cubic meter		technosphere	wastewater, average
Activity	methanol synthesis, hydrogen from electrolysis, CO2 from DAC, secondary steel
code	1fc3bd7503c64c9582848c36b6c77424_copy1
comment	Adapted from Comparative well-to-wheel life cycle assessment of OME3–5 synfuel production via the power-to-liquid pathway, Hank et al. 2019
location	EUR
reference product	methanol, unpurified
source	Comparative well-to-wheel life cycle assessment of OME3–5 synfuel production via the power-to-liquid pathway. Christoph Hank, Lukas Lazar, Franz Mantei, Mohamed Ouda, Robin J. White, Tom Smolinka, Achim Schaadt, Christopher Hebling and Hans-Martin Henning. 2019. https://doi.org/10.1039/C9SE00658C
unit	kilogram
worksheet name	inventories.csv
Exchanges
name	amount	database	location	unit	categories	type	reference product
methanol synthesis, hydrogen from electrolysis, CO2 from DAC, secondary steel	1	hydrogen	EUR	kilogram		production	methanol, unpurified
carbon dioxide, captured from atmosphere, with a solvent-based direct air capture system, 1MtCO2, with heat pump heat, and PV electricity, steel secondary	1.69042	hydrogen	EUR	kilogram		technosphere	carbon dioxide, captured from atmosphere
hydrogen production, gaseous, 30 bar, from PEM electrolysis, PV, secondary steel	0.138976	hydrogen	World	kilogram		technosphere	hydrogen, gaseous, 30 bar
market for aluminium oxide, metallurgical	3.96437e-06	remind - SSP2-NPi - 2025	IAI Area, EU27 & EFTA	kilogram		technosphere	aluminium oxide, metallurgical
market for copper oxide	2.11359e-05	remind - SSP2-NPi - 2025	GLO	kilogram		technosphere	copper oxide
market for tap water	68.8196	remind - SSP2-NPi - 2025	Europe without Switzerland	kilogram		technosphere	tap water
market for zinc oxide	7.92873e-06	remind - SSP2-NPi - 2025	GLO	kilogram		technosphere	zinc oxide
market group for electricity, low voltage	0.302895	remind - SSP2-NPi - 2025	EUR	kilowatt hour		technosphere	electricity, low voltage
methanol production facility, construction	12.89	remind - SSP2-NPi - 2025	RER	unit		technosphere	methanol production facility, construction
treatment of wastewater, average, wastewater treatment	-0.0688196	remind - SSP2-NPi - 2025	Europe without Switzerland	cubic meter		technosphere	wastewater, average
