# Supplementary material for: Digesting fossil infrastructure for cleaner energy transitions
Source: Research Square preprint supplement (doi:10.21203/rs.3.rs-6346491/v1), 2025-06-06
Supplement: Supplementary file 69 [file lci_renewables_SSP2-NPi.xlsx]

## Sheet: Renewables
Database	Renewables_SSP2-NPi_2025
Activity	open ground construction, on ground, steel, secondary
code	9gh98fad0fca46829139856a2aaa735f
comment	Production of the additional components necessary for the mounting of 1 m2 PV panel or laminate. Materials and packaging for the production and estimation for metal processing. Disposal of the product after use. Energy use for the construction process must be included in data of the PV-plant. Location: Production in CH. Technology: Construction parts for a photovoltaic system. Time period: Date o…
filename	C:\Users\sacchi_r\Downloads\IEA_PVPS_Task_12_LCI_PV_systems_2020\174-photovoltaics-global-supply-chain-v2.5._X-Montage.xml
location	RER
production amount	1
reference product	open ground construction, on ground
source	Fthenakis, V., Leccisi, E., & Frischknecht, Rolf; Stolz, Philippe; Krebs, Luana; de Wild-Scholten, Mariska; Sinha, P. (2021). Life Cycle Inventories and Life Cycle Assessments of Photovoltaic Systems 2020 Task 12 PV Sustainability. Progress in Photovoltaics: Research and Applications, 29(10), 1068–1077. www.iea-pvps.org
type	process
unit	square meter
worksheet name	PV
Exchanges
name	amount	database	location	unit	categories	type	uncertainty type	loc	comment	negative	product	reference product
Occupation, industrial area	45	biosphere3		square meter-year	natural resource::land	biosphere	0		(3,3,2,3,3,5); Assumed life time: 30 a	0
Occupation, industrial area	96.56	biosphere3		square meter-year	natural resource::land	biosphere	0		(3,3,2,3,3,5); Assumed life time: 30 a	0
Transformation, from pasture, man made	4.7187	biosphere3		square meter	natural resource::land	biosphere	0		(3,4,3,1,3,5); Tucson Electric Power	0
Transformation, to industrial area	1.5	biosphere3		square meter	natural resource::land	biosphere	0		(1,3,2,3,3,5); Literature and own estimations	0
Transformation, to industrial area	3.2187	biosphere3		square meter	natural resource::land	biosphere	0		(3,3,2,3,3,5); Literature and own estimations	0
open ground construction, on ground, steel, secondary	1	Renewables_SSP2-NPi_2025	RER	square meter		production	0	1			open ground construction, on ground	open ground construction, on ground
steel production, electric, chromium steel 18/8, optimistic, 2025	0.24747	steel_prod_SSP2-NPi_2025	World	kilogram		technosphere					steel, chromium steel 18/8	steel, chromium steel 18/8
market for concrete, normal strength	0.00053746	ecoinvent_cutoff_3.9_remind_SSP2-NPi_2025	CH	cubic meter		technosphere	0		(3,4,3,1,3,5); Fence foundation	0	concrete, normal strength	concrete, normal strength
market for corrugated board box	0.086364	ecoinvent_cutoff_3.9_remind_SSP2-NPi_2025	RER	kilogram		technosphere	0		(3,4,3,1,3,5); Schwarz et al. 1992	0	corrugated board box	corrugated board box
polyethylene production, high density, granulate	0.00090909	ecoinvent_cutoff_3.9_remind_SSP2-NPi_2025	RER	kilogram		technosphere	0		(1,2,1,1,1,na); Literature and own estimations, recycled PE	0	polyethylene, high density, granulate	polyethylene, high density, granulate
polystyrene production, high impact	0.0045455	ecoinvent_cutoff_3.9_remind_SSP2-NPi_2025	RER	kilogram		technosphere	0		(3,4,3,1,3,5); Schwarz et al. 1992	0	polystyrene, high impact	polystyrene, high impact
steel production, electric, reinforcing steel, optimistic, 2025	9.35642	steel_prod_SSP2-NPi_2025	World	kilogram		technosphere						reinforcing steel
section bar rolling, steel	8.3	ecoinvent_cutoff_3.9_remind_SSP2-NPi_2025	RER	kilogram		technosphere	0		(3,4,3,1,3,5); Brunschweiler 1993	0	section bar rolling, steel	section bar rolling, steel
transport, freight train, diesel	5.1391	ecoinvent_cutoff_3.9_remind_SSP2-NPi_2025	Europe without Switzerland	ton kilometer		technosphere	0		(4,5,na,na,na,na); Standard distances 200km, 600km	0	transport, freight train	transport, freight train
transport, freight, light commercial vehicle	1.1439	ecoinvent_cutoff_3.9_remind_SSP2-NPi_2025	Europe without Switzerland	ton kilometer		technosphere	0		(3,4,3,1,3,5); 100km to construction place	0	transport, freight, light commercial vehicle	transport, freight, light commercial vehicle
transport, freight, lorry, unspecified, long haul	0.21672	ecoinvent_cutoff_3.9_remind_SSP2-NPi_2025	EUR	ton kilometer		technosphere	0		(4,5,na,na,na,na); Standard distance 50km	0	transport, freight, lorry	transport, freight, lorry
treatment of waste paperboard, municipal incineration	-0.086364	ecoinvent_cutoff_3.9_remind_SSP2-NPi_2025	CH	kilogram		technosphere	0		(3,4,3,1,3,5); Calculated with use	0	waste paperboard	waste paperboard
treatment of waste polyethylene/polypropylene product, collection for final disposal	-0.00090909	ecoinvent_cutoff_3.9_remind_SSP2-NPi_2025	CH	kilogram		technosphere	0		(3,4,3,1,3,5); Disposal of plastics parts at end of life	0	waste polyethylene/polypropylene product	waste polyethylene/polypropylene product
treatment of waste polystyrene isolation, flame-retardant, collection for final disposal	-0.0045455	ecoinvent_cutoff_3.9_remind_SSP2-NPi_2025	CH	kilogram		technosphere	0		(3,4,3,1,3,5); Disposal of plastics parts at end of life	0	waste polystyrene isolation, flame-retardant	waste polystyrene isolation, flame-retardant
wire drawing, steel	1.059	ecoinvent_cutoff_3.9_remind_SSP2-NPi_2025	RER	kilogram		technosphere	0		(3,4,3,1,3,5); Mesh wire fence	0	wire drawing, steel	wire drawing, steel
zinc coating, coils	0.10917	ecoinvent_cutoff_3.9_remind_SSP2-NPi_2025	RER	square meter		technosphere	0		(3,4,3,1,3,5); Fence	0	zinc coat, coils	zinc coat, coils
zinc coating, pieces	0.4	ecoinvent_cutoff_3.9_remind_SSP2-NPi_2025	RER	square meter		technosphere	0		(3,4,3,1,3,5); Estimation	0	zinc coat, pieces	zinc coat, pieces
Activity	open ground construction, on ground, Al, default
code	37g98fad0fca46829139856a2aaa723g
comment	Based on ecoinvent 3.9.1. Cradle-to-gate, no End-of-Life.
location	RER
production amount	1
reference product	open ground construction, on ground
source	Fthenakis, V., Leccisi, E., & Frischknecht, Rolf; Stolz, Philippe; Krebs, Luana; de Wild-Scholten, Mariska; Sinha, P. (2021). Life Cycle Inventories and Life Cycle Assessments of Photovoltaic Systems 2020 Task 12 PV Sustainability. Progress in Photovoltaics: Research and Applications, 29(10), 1068–1077. www.iea-pvps.org
type	process
unit	square meter
worksheet name	PV
Exchanges
name	amount	database	location	unit	categories	type	uncertainty type	loc	comment	negative	reference product
open ground construction, on ground, Al, default	1	steel_prod_SSP2-NPi_2025	RER	square meter		production	0	1			open ground construction, on ground
market for aluminium, wrought alloy	3.98	ecoinvent_cutoff_3.9_remind_SSP2-NPi_2025	GLO	kilogram		technosphere	0				aluminium, wrought alloy
market group for concrete, normal strength	0.000541667	ecoinvent_cutoff_3.9_remind_SSP2-NPi_2026	GLO	cubic meter		technosphere	0				concrete, normal strength
market for corrugated board box	0.0202425	ecoinvent_cutoff_3.9_remind_SSP2-NPi_2027	US	kilogram		technosphere	0				corrugated board box
market for corrugated board box	0.000754034	ecoinvent_cutoff_3.9_remind_SSP2-NPi_2028	CA-QC	kilogram		technosphere	0				corrugated board box
market for corrugated board box	0.0183825	ecoinvent_cutoff_3.9_remind_SSP2-NPi_2029	RER	kilogram		technosphere	0				corrugated board box
market for corrugated board box	0.0469849	ecoinvent_cutoff_3.9_remind_SSP2-NPi_2030	RoW	kilogram		technosphere	0				corrugated board box
market for polyethylene, high density, granulate	0.00090909	ecoinvent_cutoff_3.9_remind_SSP2-NPi_2031	GLO	kilogram		technosphere	0				polyethylene, high density, granulate
market for polystyrene, high impact	0.0045455	ecoinvent_cutoff_3.9_remind_SSP2-NPi_2032	GLO	kilogram		technosphere	0				polystyrene, high impact
market for reinforcing steel	7.25	ecoinvent_cutoff_3.9_remind_SSP2-NPi_2033	GLO	kilogram		technosphere	0				reinforcing steel
market for scrap aluminium	-2.65828	ecoinvent_cutoff_3.9_remind_SSP2-NPi_2034	RoW	kilogram		technosphere	0			1	scrap aluminium
market for scrap aluminium	-0.059233	ecoinvent_cutoff_3.9_remind_SSP2-NPi_2035	CH	kilogram		technosphere	0			1	scrap aluminium
market for scrap aluminium	-1.26249	ecoinvent_cutoff_3.9_remind_SSP2-NPi_2036	Europe without Switzerland	kilogram		technosphere	0			1	scrap aluminium
market for scrap steel	-0.00231375	ecoinvent_cutoff_3.9_remind_SSP2-NPi_2037	CH	kilogram		technosphere	0			1	scrap steel
market for scrap steel	-5.67147	ecoinvent_cutoff_3.9_remind_SSP2-NPi_2038	RoW	kilogram		technosphere	0			1	scrap steel
market for scrap steel	-1.82621	ecoinvent_cutoff_3.9_remind_SSP2-NPi_2039	Europe without Switzerland	kilogram		technosphere	0			1	scrap steel
market for section bar extrusion, aluminium	3.98	ecoinvent_cutoff_3.9_remind_SSP2-NPi_2040	GLO	kilogram		technosphere	0				section bar extrusion, aluminium
market for section bar rolling, steel	6.15	ecoinvent_cutoff_3.9_remind_SSP2-NPi_2041	GLO	kilogram		technosphere	0				section bar rolling, steel
market for steel, chromium steel 18/8, hot rolled	0.25	ecoinvent_cutoff_3.9_remind_SSP2-NPi_2042	GLO	kilogram		technosphere	0			1	steel, chromium steel 18/8, hot rolled
waste paperboard, unsorted, Recycled Content cut-off	-0.086364	ecoinvent_cutoff_3.9_remind_SSP2-NPi_2043	GLO	kilogram		technosphere	0			1	waste paperboard, unsorted
market for waste polyethylene/polypropylene product	-0.000254994	ecoinvent_cutoff_3.9_remind_SSP2-NPi_2044	Europe without Switzerland	kilogram		technosphere	0			1	waste polyethylene/polypropylene product
market for waste polyethylene/polypropylene product	-7.65171e-06	ecoinvent_cutoff_3.9_remind_SSP2-NPi_2045	CH	kilogram		technosphere	0			1	waste polyethylene/polypropylene product
market for waste polyethylene/polypropylene product	-0.000646444	ecoinvent_cutoff_3.9_remind_SSP2-NPi_2046	RoW	kilogram		technosphere	0			1	waste polyethylene/polypropylene product
market for waste polystyrene isolation, flame-retardant	-0.00323226	ecoinvent_cutoff_3.9_remind_SSP2-NPi_2047	RoW	kilogram		technosphere	0			1	waste polystyrene isolation, flame-retardant
market for waste polystyrene isolation, flame-retardant	-0.00127498	ecoinvent_cutoff_3.9_remind_SSP2-NPi_2048	Europe without Switzerland	kilogram		technosphere	0			1	waste polystyrene isolation, flame-retardant
market for waste polystyrene isolation, flame-retardant	-3.8259e-05	ecoinvent_cutoff_3.9_remind_SSP2-NPi_2049	CH	kilogram		technosphere	0			1	waste polystyrene isolation, flame-retardant
market for waste reinforced concrete	-0.005928	ecoinvent_cutoff_3.9_remind_SSP2-NPi_2050	CH	kilogram		technosphere	0			1	waste reinforced concrete
market for waste reinforced concrete	-7.9846	ecoinvent_cutoff_3.9_remind_SSP2-NPi_2051	RoW	kilogram		technosphere	0			1	waste reinforced concrete
market for waste reinforced concrete	-0.559469	ecoinvent_cutoff_3.9_remind_SSP2-NPi_2052	Europe without Switzerland	kilogram		technosphere	0			1	waste reinforced concrete
market for wire drawing, steel	1.1	ecoinvent_cutoff_3.9_remind_SSP2-NPi_2053	GLO	kilogram		technosphere	0				wire drawing, steel
market for zinc coat, coils	0.11	ecoinvent_cutoff_3.9_remind_SSP2-NPi_2054	GLO	square meter		technosphere	0				zinc coat, coils
market for zinc coat, pieces	0.156	ecoinvent_cutoff_3.9_remind_SSP2-NPi_2055	GLO	square meter		technosphere	0				zinc coat, pieces
Occupation, industrial area	141	biosphere3		square meter-year	natural resource::land	biosphere	0
Transformation, from pasture, man made	4.7	biosphere3		square meter	natural resource::land	biosphere	0
Transformation, to industrial area	4.7	biosphere3		square meter	natural resource::land	biosphere	0
Activity	photovoltaic mounting system production, for slanted-roof installation, steel, secondary
code	604047a061f97702b0cf1be89409344e_copy1
comment	This dataset represents the production of the structural components necessary for the mounting of 1 m2 photovoltaic panel on a slanted roof. This is a common and simple type of mounting system. It is necessary to have a faultless roof. The mounting system uses wood, aluminium or steel that is directly attached to the rafter of the roof. Good ventilation is ensured with a distance of about 10 cm f…
location	RoW
reference product	photovoltaic mounting system, for slanted-roof installation
unit	square meter
Exchanges
name	amount	database	location	unit	type	formula	uncertainty type	loc	original_amount	production volume	reference product
photovoltaic mounting system production, for slanted-roof installation, steel, secondary	1	Renewables_SSP2-NPi_2025	RoW	square meter	production		0	1		1.80032e+07	photovoltaic mounting system, for slanted-roof installation
steel production, electric, low-alloyed, optimistic, 2025	1.4999	steel_prod_SSP2-NPi_2025	World	kilogram	technosphere						steel, low-alloyed
market for corrugated board box	0.039698	ecoinvent_cutoff_3.9_remind_SSP2-NPi_2025	US	kilogram	technosphere		0			0	corrugated board box
market for corrugated board box	0.00147875	ecoinvent_cutoff_3.9_remind_SSP2-NPi_2025	CA-QC	kilogram	technosphere		0			0	corrugated board box
market for corrugated board box	0.0921432	ecoinvent_cutoff_3.9_remind_SSP2-NPi_2025	RoW	kilogram	technosphere		0			0	corrugated board box
market for polyethylene, high density, granulate	0.0014033	ecoinvent_cutoff_3.9_remind_SSP2-NPi_2025	GLO	kilogram	technosphere		0			0	polyethylene, high density, granulate
market for polystyrene, high impact	0.0070167	ecoinvent_cutoff_3.9_remind_SSP2-NPi_2025	GLO	kilogram	technosphere		0			0	polystyrene, high impact
market for scrap steel	-3.03	ecoinvent_cutoff_3.9_remind_SSP2-NPi_2025	RoW	kilogram	technosphere	-1.4999*material_efficiency	0	-1.4999	-1.4999	0	scrap steel
market for sheet rolling, steel	3.03	ecoinvent_cutoff_3.9_remind_SSP2-NPi_2025	GLO	kilogram	technosphere	1.4999*material_efficiency	0		1.4999	0	sheet rolling, steel
market for waste polyethylene/polypropylene product	-0.0014033	ecoinvent_cutoff_3.9_remind_SSP2-NPi_2025	RoW	kilogram	technosphere		0			0	waste polyethylene/polypropylene product
market for waste polystyrene isolation, flame-retardant	-0.0070167	ecoinvent_cutoff_3.9_remind_SSP2-NPi_2025	RoW	kilogram	technosphere		0			0	waste polystyrene isolation, flame-retardant
market for zinc coat, pieces	0.173533	ecoinvent_cutoff_3.9_remind_SSP2-NPi_2025	GLO	square meter	technosphere						zinc coat, pieces
steel production, electric, reinforcing steel, optimistic, 2025	1.53117	steel_prod_SSP2-NPi_2025	World	kilogram	technosphere						reinforcing steel
waste paperboard, unsorted, Recycled Content cut-off	-0.13332	ecoinvent_cutoff_3.9_remind_SSP2-NPi_2025	GLO	kilogram	technosphere		0			0	waste paperboard, unsorted
Activity	photovoltaic open ground installation, 570 kWp, single-Si, on open ground, steel, secondary
code	beac79c663hf91ab831ee5ec71cc2393g
comment	`premise` has changed the efficiency of this photovoltaic installation from 18 pct. to 19 pt.
filename	C:\Users\sacchi_r\Downloads\IEA_PVPS_Task_12_LCI_PV_systems_2020\174-photovoltaics-global-supply-chain-v2.5._X-singleSi-plants-RER.xml
location	RER
production amount	1
reference product	photovoltaic open ground installation, 570 kWp, single-Si, on open ground
source	Fthenakis, V., Leccisi, E., & Frischknecht, Rolf; Stolz, Philippe; Krebs, Luana; de Wild-Scholten, Mariska; Sinha, P. (2021). Life Cycle Inventories and Life Cycle Assessments of Photovoltaic Systems 2020 Task 12 PV Sustainability. Progress in Photovoltaics: Research and Applications, 29(10), 1068–1077. www.iea-pvps.org
type	process
unit	unit
worksheet name	PV
Exchanges
name	amount	database	location	unit	categories	type	uncertainty type	loc	comment	negative	product	reference product
Heat, waste	129.72	biosphere3		megajoule	air::urban air close to ground	biosphere	0		(3,4,3,1,1,5); calculated with electricity use	0
photovoltaic open ground installation, 570 kWp, single-Si, on open ground, steel, secondary	1	Renewables_SSP2-NPi_2025	RER	unit		production	0	1			photovoltaic open ground installation, 570 kWp, single-Si, on open ground	photovoltaic open ground installation, 570 kWp, single-Si, on open ground
diesel, burned in building machine	7673.1	ecoinvent_cutoff_3.9_remind_SSP2-NPi_2025	GLO	megajoule		technosphere	0		(3,4,3,1,1,5); Energy use for foundation piling and wheel loader	0	diesel, burned in building machine	diesel, burned in building machine
electric installation, 570 kWp photovoltaic plant, at plant	1	ecoinvent_cutoff_3.9_remind_SSP2-NPi_2025	ES	unit		technosphere	0		(3,4,3,1,1,5); cabling, lightning protection and fuse box	0		electric installation, 570 kWp photovoltaic plant, at plant
inverter production, 500kW	2.28	ecoinvent_cutoff_3.9_remind_SSP2-NPi_2025	RER	unit		technosphere	0		(2,4,1,1,1,na); 1 replacement during the lifetime of the PV system; demand scaled linearly by power output	0	inverter, 500kW	inverter, 500kW
market for electricity, low voltage	36.033	ecoinvent_cutoff_3.9_remind_SSP2-NPi_2025	DE	kilowatt hour		technosphere	0		(3,4,3,1,1,5); Energy use for erection of plant	0	electricity, low voltage	electricity, low voltage
open ground construction, on ground, steel, secondary	2923.1	Renewables_SSP2-NPi_2025	RER	square meter		technosphere						open ground construction, on ground
market for photovoltaic panel, single-Si wafer, glass-backsheet	2943.2	Renewables_SSP2-NPi_2025	RER	square meter		technosphere	0		(3,4,3,1,1,5); Calculation, 2% of modules repaired in the life time, 1% rejects	0		photovoltaic panel, single-Si wafer, glass-backsheet
transport, freight, lorry, unspecified, long haul	8542.8	ecoinvent_cutoff_3.9_remind_SSP2-NPi_2025	EUR	ton kilometer		technosphere	0		(3,4,3,1,1,5); transport of inverter, electric installation, mounting structure and module 100km to construction site	0	transport, freight, lorry	transport, freight, lorry
Takeback & recycling of glass-backsheet sc-Si modules	39594	ecoinvent_cutoff_3.9_remind_SSP2-NPi_2025	RER	kilogram		technosphere	0		(3,4,3,1,1,5); recycling of PV modules at the end of life	0		Takeback & recycling of glass-backsheet sc-Si modules
Activity	photovoltaic open ground installation, 570 kWp, single-Si, on open ground, default
code	be93h9u663v941ab262ee5ec71cc208d
comment	`premise` has changed the efficiency of this photovoltaic installation from 18 pct. to 19 pt.
filename	C:\Users\sacchi_r\Downloads\IEA_PVPS_Task_12_LCI_PV_systems_2020\174-photovoltaics-global-supply-chain-v2.5._X-singleSi-plants-RER.xml
location	RER
production amount	1
reference product	photovoltaic open ground installation, 570 kWp, single-Si, on open ground
source	Fthenakis, V., Leccisi, E., & Frischknecht, Rolf; Stolz, Philippe; Krebs, Luana; de Wild-Scholten, Mariska; Sinha, P. (2021). Life Cycle Inventories and Life Cycle Assessments of Photovoltaic Systems 2020 Task 12 PV Sustainability. Progress in Photovoltaics: Research and Applications, 29(10), 1068–1077. www.iea-pvps.org
type	process
unit	unit
worksheet name	PV
Exchanges
name	amount	database	location	unit	categories	type	uncertainty type	loc	comment	negative	product	reference product
Heat, waste	129.72	biosphere3		megajoule	air::urban air close to ground	biosphere	0		(3,4,3,1,1,5); calculated with electricity use	0
photovoltaic open ground installation, 570 kWp, single-Si, on open ground, default	1	Renewables_SSP2-NPi_2025	RER	unit		production	0	1			photovoltaic open ground installation, 570 kWp, single-Si, on open ground	photovoltaic open ground installation, 570 kWp, single-Si, on open ground
diesel, burned in building machine	7673.1	ecoinvent_cutoff_3.9_remind_SSP2-NPi_2025	GLO	megajoule		technosphere	0		(3,4,3,1,1,5); Energy use for foundation piling and wheel loader	0	diesel, burned in building machine	diesel, burned in building machine
electric installation, 570 kWp photovoltaic plant, at plant	1	ecoinvent_cutoff_3.9_remind_SSP2-NPi_2025	ES	unit		technosphere	0		(3,4,3,1,1,5); cabling, lightning protection and fuse box	0		electric installation, 570 kWp photovoltaic plant, at plant
inverter production, 500kW	2.28	ecoinvent_cutoff_3.9_remind_SSP2-NPi_2025	RER	unit		technosphere	0		(2,4,1,1,1,na); 1 replacement during the lifetime of the PV system; demand scaled linearly by power output	0	inverter, 500kW	inverter, 500kW
market for electricity, low voltage	36.033	ecoinvent_cutoff_3.9_remind_SSP2-NPi_2025	DE	kilowatt hour		technosphere	0		(3,4,3,1,1,5); Energy use for erection of plant	0	electricity, low voltage	electricity, low voltage
open ground construction, on ground, Al, default	2923.1	Renewables_SSP2-NPi_2025	RER	square meter		technosphere						open ground construction, on ground
market for photovoltaic panel, single-Si wafer, glass-backsheet	2943.2	Renewables_SSP2-NPi_2025	RER	square meter		technosphere	0		(3,4,3,1,1,5); Calculation, 2% of modules repaired in the life time, 1% rejects	0		photovoltaic panel, single-Si wafer, glass-backsheet
transport, freight, lorry, unspecified, long haul	8542.8	ecoinvent_cutoff_3.9_remind_SSP2-NPi_2025	EUR	ton kilometer		technosphere	0		(3,4,3,1,1,5); transport of inverter, electric installation, mounting structure and module 100km to construction site	0	transport, freight, lorry	transport, freight, lorry
Takeback & recycling of glass-backsheet sc-Si modules	39594	ecoinvent_cutoff_3.9_remind_SSP2-NPi_2025	RER	kilogram		technosphere	0		(3,4,3,1,1,5); recycling of PV modules at the end of life	0		Takeback & recycling of glass-backsheet sc-Si modules
Activity	photovoltaic slanted-roof installation, 3kWp, single-Si, panel, mounted, on roof, steel, secondary
code	a1a499fb195c66a4hf7477598bcbe272
comment	`premise` has changed the efficiency of this photovoltaic installation from 13 pct. to 19 pt.
location	RoW
reference product	photovoltaic slanted-roof installation, 3kWp, single-Si, panel, mounted, on roof
unit	unit
Exchanges
name	amount	database	location	unit	type	uncertainty type	loc	production volume	reference product
photovoltaic slanted-roof installation, 3kWp, single-Si, panel, mounted, on roof, steel, secondary	1	Renewables_SSP2-NPi_2025	RoW	unit	production	0	1	294040	photovoltaic slanted-roof installation, 3kWp, single-Si, panel, mounted, on roof
market for electricity, low voltage	0.00040205	ecoinvent_cutoff_3.9_remind_SSP2-NPi_2025	NZ	kilowatt hour	technosphere	0		0	electricity, low voltage
market for electricity, low voltage	0.00221084	ecoinvent_cutoff_3.9_remind_SSP2-NPi_2025	AU	kilowatt hour	technosphere	0		0	electricity, low voltage
market for electricity, low voltage	0.0090413	ecoinvent_cutoff_3.9_remind_SSP2-NPi_2025	RU	kilowatt hour	technosphere	0		0	electricity, low voltage
market for inverter, 2.5kW	2.4	ecoinvent_cutoff_3.9_remind_SSP2-NPi_2025	GLO	unit	technosphere	0		0	inverter, 2.5kW
market for photovoltaic panel, single-Si wafer, glass-backsheet	15.4905	Renewables_SSP2-NPi_2025	GLO	square meter	technosphere	0		0	photovoltaic panel, single-Si wafer, glass-backsheet
market for photovoltaics, electric installation for 3kWp module, at building	1	ecoinvent_cutoff_3.9_remind_SSP2-NPi_2025	GLO	unit	technosphere	0		0	photovoltaics, electric installation for 3kWp module, at building
market group for electricity, low voltage	0.123936	ecoinvent_cutoff_3.9_remind_SSP2-NPi_2025	RAS	kilowatt hour	technosphere	0		0	electricity, low voltage
market group for electricity, low voltage	0.0129019	ecoinvent_cutoff_3.9_remind_SSP2-NPi_2025	RLA	kilowatt hour	technosphere	0		0	electricity, low voltage
market group for electricity, low voltage	0.0442944	ecoinvent_cutoff_3.9_remind_SSP2-NPi_2025	RNA	kilowatt hour	technosphere	0		0	electricity, low voltage
market group for electricity, low voltage	0.0307031	ecoinvent_cutoff_3.9_remind_SSP2-NPi_2025	Europe without Switzerland	kilowatt hour	technosphere	0		0	electricity, low voltage
market group for electricity, low voltage	0.00651029	ecoinvent_cutoff_3.9_remind_SSP2-NPi_2025	RAF	kilowatt hour	technosphere	0		0	electricity, low voltage
photovoltaic mounting system production, for slanted-roof installation, steel, secondary	21.429	Renewables_SSP2-NPi_2025	RoW	square meter	technosphere				photovoltaic mounting system, for slanted-roof installation
Takeback & recycling of glass-backsheet sc-Si modules	23.3907	ecoinvent_cutoff_3.9_remind_SSP2-NPi_2025	RoW	kilogram	technosphere	0		0	Takeback & recycling of glass-backsheet sc-Si modules
Activity	photovoltaic slanted-roof installation, 3kWp, single-Si, panel, mounted, on roof, default
code	a1a49d6f195c6609md3477598bcbe7vc
comment	`premise` has changed the efficiency of this photovoltaic installation from 13 pct. to 19 pt.
location	RoW
reference product	photovoltaic slanted-roof installation, 3kWp, single-Si, panel, mounted, on roof
unit	unit
Exchanges
name	amount	database	location	unit	type	uncertainty type	loc	production volume	reference product
photovoltaic slanted-roof installation, 3kWp, single-Si, panel, mounted, on roof, default	1	Renewables_SSP2-NPi_2025	RoW	unit	production	0	1	294040	photovoltaic slanted-roof installation, 3kWp, single-Si, panel, mounted, on roof
market for electricity, low voltage	0.00040205	ecoinvent_cutoff_3.9_remind_SSP2-NPi_2025	NZ	kilowatt hour	technosphere	0		0	electricity, low voltage
market for electricity, low voltage	0.00221084	ecoinvent_cutoff_3.9_remind_SSP2-NPi_2025	AU	kilowatt hour	technosphere	0		0	electricity, low voltage
market for electricity, low voltage	0.0090413	ecoinvent_cutoff_3.9_remind_SSP2-NPi_2025	RU	kilowatt hour	technosphere	0		0	electricity, low voltage
market for inverter, 2.5kW	2.4	ecoinvent_cutoff_3.9_remind_SSP2-NPi_2025	GLO	unit	technosphere	0		0	inverter, 2.5kW
market for photovoltaic panel, single-Si wafer, glass-backsheet	15.4905	Renewables_SSP2-NPi_2025	GLO	square meter	technosphere	0		0	photovoltaic panel, single-Si wafer, glass-backsheet
market for photovoltaics, electric installation for 3kWp module, at building	1	ecoinvent_cutoff_3.9_remind_SSP2-NPi_2025	GLO	unit	technosphere	0		0	photovoltaics, electric installation for 3kWp module, at building
market group for electricity, low voltage	0.123936	ecoinvent_cutoff_3.9_remind_SSP2-NPi_2025	RAS	kilowatt hour	technosphere	0		0	electricity, low voltage
market group for electricity, low voltage	0.0129019	ecoinvent_cutoff_3.9_remind_SSP2-NPi_2025	RLA	kilowatt hour	technosphere	0		0	electricity, low voltage
market group for electricity, low voltage	0.0442944	ecoinvent_cutoff_3.9_remind_SSP2-NPi_2025	RNA	kilowatt hour	technosphere	0		0	electricity, low voltage
market group for electricity, low voltage	0.0307031	ecoinvent_cutoff_3.9_remind_SSP2-NPi_2025	Europe without Switzerland	kilowatt hour	technosphere	0		0	electricity, low voltage
market group for electricity, low voltage	0.00651029	ecoinvent_cutoff_3.9_remind_SSP2-NPi_2025	RAF	kilowatt hour	technosphere	0		0	electricity, low voltage
photovoltaic mounting system production, for slanted-roof installation	21.429	ecoinvent_cutoff_3.9_remind_SSP2-NPi_2025	RoW	square meter	technosphere				photovoltaic mounting system, for slanted-roof installation
Takeback & recycling of glass-backsheet sc-Si modules	23.3907	ecoinvent_cutoff_3.9_remind_SSP2-NPi_2025	RoW	kilogram	technosphere	0		0	Takeback & recycling of glass-backsheet sc-Si modules
Activity	wind power plant construction, 2MW, offshore, fixed parts, primary
code	9c6911253a187b5b0e07aea0e0a08463_copy2
comment	This dataset represents the fixed parts of a 2 MW offshore wind power plant, based on the dimensions of an offshore wind power plant of the type Bonus 2 MW. [This dataset was already contained in the ecoinvent database version 2. It was not individually updated during the transfer to ecoinvent version 3. Life Cycle Impact Assessment results may still have changed, as they are affected by changes …
location	GLO
reference product	wind power plant, 2MW, offshore, fixed parts
unit	unit
Exchanges
name	amount	database	location	unit	categories	type	uncertainty type	loc	production volume	reference product
Occupation, seabed, infrastructure	450	biosphere3		square meter-year	natural resource::land	biosphere	0		0
Transformation, from seabed, unspecified	22.5	biosphere3		square meter	natural resource::land	biosphere	0		0
Transformation, to seabed, infrastructure	22.5	biosphere3		square meter	natural resource::land	biosphere	0		0
wind power plant construction, 2MW, offshore, fixed parts, primary	1	Renewables_SSP2-NPi_2025	GLO	unit		production	0	1	175	wind power plant, 2MW, offshore, fixed parts
market for copper, cathode	3900	ecoinvent_cutoff_3.9_remind_SSP2-NPi_2025	GLO	kilogram		technosphere	0		0	copper, cathode
market for diesel, burned in building machine	876	ecoinvent_cutoff_3.9_remind_SSP2-NPi_2025	GLO	megajoule		technosphere	0		0	diesel, burned in building machine
market for epoxy resin, liquid	451.822	ecoinvent_cutoff_3.9_remind_SSP2-NPi_2025	RoW	kilogram		technosphere	0		0	epoxy resin, liquid
market for epoxy resin, liquid	95.178	ecoinvent_cutoff_3.9_remind_SSP2-NPi_2025	RER	kilogram		technosphere	0		0	epoxy resin, liquid
market for excavation, hydraulic digger	52500	ecoinvent_cutoff_3.9_remind_SSP2-NPi_2025	GLO	cubic meter		technosphere	0		0	excavation, hydraulic digger
market for gravel, crushed	16.38	ecoinvent_cutoff_3.9_remind_SSP2-NPi_2025	CH	kilogram		technosphere	0		0	gravel, crushed
market for gravel, crushed	47619.4	ecoinvent_cutoff_3.9_remind_SSP2-NPi_2025	RoW	kilogram		technosphere	0		0	gravel, crushed
market for gravel, crushed	2709.97	ecoinvent_cutoff_3.9_remind_SSP2-NPi_2025	BR	kilogram		technosphere	0		0	gravel, crushed
market for gravel, crushed	248.097	ecoinvent_cutoff_3.9_remind_SSP2-NPi_2025	CA-QC	kilogram		technosphere	0		0	gravel, crushed
market for gravel, crushed	12406.2	ecoinvent_cutoff_3.9_remind_SSP2-NPi_2025	IN	kilogram		technosphere	0		0	gravel, crushed
market for gravel, round	236938	ecoinvent_cutoff_3.9_remind_SSP2-NPi_2025	RoW	kilogram		technosphere	0		0	gravel, round
market for gravel, round	61.62	ecoinvent_cutoff_3.9_remind_SSP2-NPi_2025	CH	kilogram		technosphere	0		0	gravel, round
market for lead	7580	ecoinvent_cutoff_3.9_remind_SSP2-NPi_2025	GLO	kilogram		technosphere	0		0	lead
market for polyvinylchloride, bulk polymerised	3500	ecoinvent_cutoff_3.9_remind_SSP2-NPi_2025	GLO	kilogram		technosphere	0		0	polyvinylchloride, bulk polymerised
market for scrap steel	-30.3564	ecoinvent_cutoff_3.9_remind_SSP2-NPi_2025	CH	kilogram		technosphere	0	-30.3564	0	scrap steel
market for scrap steel	-74409.7	ecoinvent_cutoff_3.9_remind_SSP2-NPi_2025	RoW	kilogram		technosphere	0	-74409.7	0	scrap steel
market for scrap steel	-23959.9	ecoinvent_cutoff_3.9_remind_SSP2-NPi_2025	Europe without Switzerland	kilogram		technosphere	0	-23959.9	0	scrap steel
market for sheet rolling, steel	122000	ecoinvent_cutoff_3.9_remind_SSP2-NPi_2025	GLO	kilogram		technosphere	0		0	sheet rolling, steel
market for welding, arc, steel	228	ecoinvent_cutoff_3.9_remind_SSP2-NPi_2025	GLO	meter		technosphere	0		0	welding, arc, steel
market for wire drawing, copper	3900	ecoinvent_cutoff_3.9_remind_SSP2-NPi_2025	GLO	kilogram		technosphere	0		0	wire drawing, copper
market group for concrete, normal strength	872	ecoinvent_cutoff_3.9_remind_SSP2-NPi_2025	GLO	cubic meter		technosphere	0		0	concrete, normal strength
reinforcing steel production, converter, 2025	80000	steel_prod_SSP2-NPi_2025	GLO	kilogram		technosphere				reinforcing steel
steel production, converter, low-alloyed, 2025	122000	steel_prod_SSP2-NPi_2025	World	kilogram		technosphere				steel, low-alloyed
Activity	wind power plant construction, 2MW, offshore, fixed parts, secondary, optimistic
code	02h911253a187b5b0e07aea0e0a089fg
comment	This dataset represents the fixed parts of a 2 MW offshore wind power plant, based on the dimensions of an offshore wind power plant of the type Bonus 2 MW. [This dataset was already contained in the ecoinvent database version 2. It was not individually updated during the transfer to ecoinvent version 3. Life Cycle Impact Assessment results may still have changed, as they are affected by changes …
location	GLO
reference product	wind power plant, 2MW, offshore, fixed parts
unit	unit
Exchanges
name	amount	database	location	unit	categories	type	uncertainty type	loc	production volume	reference product
Occupation, seabed, infrastructure	450	biosphere3		square meter-year	natural resource::land	biosphere	0		0
Transformation, from seabed, unspecified	22.5	biosphere3		square meter	natural resource::land	biosphere	0		0
Transformation, to seabed, infrastructure	22.5	biosphere3		square meter	natural resource::land	biosphere	0		0
wind power plant construction, 2MW, offshore, fixed parts, secondary, optimistic	1	Renewables_SSP2-NPi_2025	GLO	unit		production	0	1	175	wind power plant, 2MW, offshore, fixed parts
steel production, electric, low-alloyed, optimistic, 2025	122000	steel_prod_SSP2-NPi_2025	World	kilogram		technosphere				steel, low-alloyed
market for copper, cathode	3900	ecoinvent_cutoff_3.9_remind_SSP2-NPi_2025	GLO	kilogram		technosphere	0		0	copper, cathode
market for diesel, burned in building machine	876	ecoinvent_cutoff_3.9_remind_SSP2-NPi_2025	GLO	megajoule		technosphere	0		0	diesel, burned in building machine
market for epoxy resin, liquid	451.822	ecoinvent_cutoff_3.9_remind_SSP2-NPi_2025	RoW	kilogram		technosphere	0		0	epoxy resin, liquid
market for epoxy resin, liquid	95.178	ecoinvent_cutoff_3.9_remind_SSP2-NPi_2025	RER	kilogram		technosphere	0		0	epoxy resin, liquid
market for excavation, hydraulic digger	52500	ecoinvent_cutoff_3.9_remind_SSP2-NPi_2025	GLO	cubic meter		technosphere	0		0	excavation, hydraulic digger
market for gravel, crushed	16.38	ecoinvent_cutoff_3.9_remind_SSP2-NPi_2025	CH	kilogram		technosphere	0		0	gravel, crushed
market for gravel, crushed	47619.4	ecoinvent_cutoff_3.9_remind_SSP2-NPi_2025	RoW	kilogram		technosphere	0		0	gravel, crushed
market for gravel, crushed	2709.97	ecoinvent_cutoff_3.9_remind_SSP2-NPi_2025	BR	kilogram		technosphere	0		0	gravel, crushed
market for gravel, crushed	248.097	ecoinvent_cutoff_3.9_remind_SSP2-NPi_2025	CA-QC	kilogram		technosphere	0		0	gravel, crushed
market for gravel, crushed	12406.2	ecoinvent_cutoff_3.9_remind_SSP2-NPi_2025	IN	kilogram		technosphere	0		0	gravel, crushed
market for gravel, round	236938	ecoinvent_cutoff_3.9_remind_SSP2-NPi_2025	RoW	kilogram		technosphere	0		0	gravel, round
market for gravel, round	61.62	ecoinvent_cutoff_3.9_remind_SSP2-NPi_2025	CH	kilogram		technosphere	0		0	gravel, round
market for lead	7580	ecoinvent_cutoff_3.9_remind_SSP2-NPi_2025	GLO	kilogram		technosphere	0		0	lead
market for polyvinylchloride, bulk polymerised	3500	ecoinvent_cutoff_3.9_remind_SSP2-NPi_2025	GLO	kilogram		technosphere	0		0	polyvinylchloride, bulk polymerised
market for scrap steel	-30.3564	ecoinvent_cutoff_3.9_remind_SSP2-NPi_2025	CH	kilogram		technosphere	0	-30.3564	0	scrap steel
market for scrap steel	-74409.7	ecoinvent_cutoff_3.9_remind_SSP2-NPi_2025	RoW	kilogram		technosphere	0	-74409.7	0	scrap steel
market for scrap steel	-23959.9	ecoinvent_cutoff_3.9_remind_SSP2-NPi_2025	Europe without Switzerland	kilogram		technosphere	0	-23959.9	0	scrap steel
market for sheet rolling, steel	122000	ecoinvent_cutoff_3.9_remind_SSP2-NPi_2025	GLO	kilogram		technosphere	0		0	sheet rolling, steel
market for welding, arc, steel	228	ecoinvent_cutoff_3.9_remind_SSP2-NPi_2025	GLO	meter		technosphere	0		0	welding, arc, steel
market for wire drawing, copper	3900	ecoinvent_cutoff_3.9_remind_SSP2-NPi_2025	GLO	kilogram		technosphere	0		0	wire drawing, copper
market group for concrete, normal strength	872	ecoinvent_cutoff_3.9_remind_SSP2-NPi_2025	GLO	cubic meter		technosphere	0		0	concrete, normal strength
steel production, electric, reinforcing steel, optimistic, 2025	80000	steel_prod_SSP2-NPi_2025	World	kilogram		technosphere				reinforcing steel
Activity	wind power plant construction, 2MW, offshore, moving parts, primary, optimistic
code	209e91c63d11js77c075b46b9479h1f
comment	This dataset represents the moving parts of a 2 MW offshore wind power plant, based on the dimensions of an offshore wind power plant of the type Bonus 2 MW. [This dataset was already contained in the ecoinvent database version 2. It was not individually updated during the transfer to ecoinvent version 3. Life Cycle Impact Assessment results may still have changed, as they are affected by changes…
location	GLO
reference product	wind power plant, 2MW, offshore, moving parts
unit	unit
Exchanges
name	amount	database	location	unit	type	uncertainty type	loc	production volume	reference product
wind power plant construction, 2MW, offshore, moving parts, primary, optimistic	1	Renewables_SSP2-NPi_2025	GLO	unit	production	0	1	175	wind power plant, 2MW, offshore, moving parts
aluminium scrap, new, Recycled Content cut-off	-845	ecoinvent_cutoff_3.9_remind_SSP2-NPi_2025	GLO	kilogram	technosphere	0	-845	0	aluminium scrap, new
market for aluminium, wrought alloy	845	ecoinvent_cutoff_3.9_remind_SSP2-NPi_2025	GLO	kilogram	technosphere	0		0	aluminium, wrought alloy
market for cast iron	26400	ecoinvent_cutoff_3.9_remind_SSP2-NPi_2025	GLO	kilogram	technosphere	0		0	cast iron
market for copper, cathode	1590	ecoinvent_cutoff_3.9_remind_SSP2-NPi_2025	GLO	kilogram	technosphere	0		0	copper, cathode
market for glass fibre reinforced plastic, polyamide, injection moulded	41000	ecoinvent_cutoff_3.9_remind_SSP2-NPi_2025	GLO	kilogram	technosphere	0		0	glass fibre reinforced plastic, polyamide, injection moulded
market for lead	0.5	ecoinvent_cutoff_3.9_remind_SSP2-NPi_2025	GLO	kilogram	technosphere	0		0	lead
market for lubricating oil	200.1	ecoinvent_cutoff_3.9_remind_SSP2-NPi_2025	RER	kilogram	technosphere	0		0	lubricating oil
market for lubricating oil	949.9	ecoinvent_cutoff_3.9_remind_SSP2-NPi_2025	RoW	kilogram	technosphere	0		0	lubricating oil
market for polyethylene, high density, granulate	27	ecoinvent_cutoff_3.9_remind_SSP2-NPi_2025	GLO	kilogram	technosphere	0		0	polyethylene, high density, granulate
market for polyvinylchloride, bulk polymerised	6	ecoinvent_cutoff_3.9_remind_SSP2-NPi_2025	GLO	kilogram	technosphere	0		0	polyvinylchloride, bulk polymerised
market for scrap copper	-23.6635	ecoinvent_cutoff_3.9_remind_SSP2-NPi_2025	CH	kilogram	technosphere	0	-23.6635	0	scrap copper
market for scrap copper	-1061.98	ecoinvent_cutoff_3.9_remind_SSP2-NPi_2025	RoW	kilogram	technosphere	0	-1061.98	0	scrap copper
market for scrap copper	-504.36	ecoinvent_cutoff_3.9_remind_SSP2-NPi_2025	Europe without Switzerland	kilogram	technosphere	0	-504.36	0	scrap copper
market for scrap steel	-28.9681	ecoinvent_cutoff_3.9_remind_SSP2-NPi_2025	CH	kilogram	technosphere	0		0	scrap steel
market for scrap steel	-71006.8	ecoinvent_cutoff_3.9_remind_SSP2-NPi_2025	RoW	kilogram	technosphere	0		0	scrap steel
market for scrap steel	-22864.2	ecoinvent_cutoff_3.9_remind_SSP2-NPi_2025	Europe without Switzerland	kilogram	technosphere	0		0	scrap steel
market for section bar rolling, steel	42300	ecoinvent_cutoff_3.9_remind_SSP2-NPi_2025	GLO	kilogram	technosphere	0		0	section bar rolling, steel
market for sheet rolling, aluminium	845	ecoinvent_cutoff_3.9_remind_SSP2-NPi_2025	GLO	kilogram	technosphere	0		0	sheet rolling, aluminium
market for sheet rolling, chromium steel	51600	ecoinvent_cutoff_3.9_remind_SSP2-NPi_2025	GLO	kilogram	technosphere	0		0	sheet rolling, chromium steel
market for synthetic rubber	100	ecoinvent_cutoff_3.9_remind_SSP2-NPi_2025	GLO	kilogram	technosphere	0		0	synthetic rubber
market for tin	0.5	ecoinvent_cutoff_3.9_remind_SSP2-NPi_2025	GLO	kilogram	technosphere	0		0	tin
market for waste glass	-82.1792	ecoinvent_cutoff_3.9_remind_SSP2-NPi_2025	ZA	kilogram	technosphere	0		0	waste glass
market for waste glass	-27.8891	ecoinvent_cutoff_3.9_remind_SSP2-NPi_2025	PE	kilogram	technosphere	0		0	waste glass
market for waste glass	-2135.75	ecoinvent_cutoff_3.9_remind_SSP2-NPi_2025	BR	kilogram	technosphere	0		0	waste glass
market for waste glass	-18.3656	ecoinvent_cutoff_3.9_remind_SSP2-NPi_2025	IN	kilogram	technosphere	0		0	waste glass
market for waste glass	-196.847	ecoinvent_cutoff_3.9_remind_SSP2-NPi_2025	CO	kilogram	technosphere	0		0	waste glass
market for waste glass	-20127.6	ecoinvent_cutoff_3.9_remind_SSP2-NPi_2025	RoW	kilogram	technosphere	0		0	waste glass
market for waste glass	-4.4658	ecoinvent_cutoff_3.9_remind_SSP2-NPi_2025	CY	kilogram	technosphere	0		0	waste glass
market for waste mineral oil	-826.52	ecoinvent_cutoff_3.9_remind_SSP2-NPi_2025	RoW	kilogram	technosphere	0		0	waste mineral oil
market for waste mineral oil	-315.665	ecoinvent_cutoff_3.9_remind_SSP2-NPi_2025	Europe without Switzerland	kilogram	technosphere	0		0	waste mineral oil
market for waste mineral oil	-7.81461	ecoinvent_cutoff_3.9_remind_SSP2-NPi_2025	CH	kilogram	technosphere	0		0	waste mineral oil
market for waste plastic, mixture	-17.8924	ecoinvent_cutoff_3.9_remind_SSP2-NPi_2025	PE	kilogram	technosphere	0		0	waste plastic, mixture
market for waste plastic, mixture	-44.2893	ecoinvent_cutoff_3.9_remind_SSP2-NPi_2025	IN	kilogram	technosphere	0		0	waste plastic, mixture
market for waste plastic, mixture	-1604.83	ecoinvent_cutoff_3.9_remind_SSP2-NPi_2025	BR	kilogram	technosphere	0		0	waste plastic, mixture
market for waste plastic, mixture	-11234.7	ecoinvent_cutoff_3.9_remind_SSP2-NPi_2025	RoW	kilogram	technosphere	0		0	waste plastic, mixture
market for waste plastic, mixture	-42.0568	ecoinvent_cutoff_3.9_remind_SSP2-NPi_2025	ZA	kilogram	technosphere	0		0	waste plastic, mixture
market for waste plastic, mixture	-107.229	ecoinvent_cutoff_3.9_remind_SSP2-NPi_2025	CO	kilogram	technosphere	0		0	waste plastic, mixture
market for waste plastic, mixture	-8.10953	ecoinvent_cutoff_3.9_remind_SSP2-NPi_2025	CY	kilogram	technosphere	0		0	waste plastic, mixture
market for waste polyethylene	-2.99865	ecoinvent_cutoff_3.9_remind_SSP2-NPi_2025	BR	kilogram	technosphere	0		0	waste polyethylene
market for waste polyethylene	-0.200358	ecoinvent_cutoff_3.9_remind_SSP2-NPi_2025	CO	kilogram	technosphere	0		0	waste polyethylene
market for waste polyethylene	-0.0785837	ecoinvent_cutoff_3.9_remind_SSP2-NPi_2025	ZA	kilogram	technosphere	0		0	waste polyethylene
market for waste polyethylene	-20.9922	ecoinvent_cutoff_3.9_remind_SSP2-NPi_2025	RoW	kilogram	technosphere	0		0	waste polyethylene
market for waste polyethylene	-0.0151528	ecoinvent_cutoff_3.9_remind_SSP2-NPi_2025	CY	kilogram	technosphere	0		0	waste polyethylene
market for waste polyethylene	-0.0334321	ecoinvent_cutoff_3.9_remind_SSP2-NPi_2025	PE	kilogram	technosphere	0		0	waste polyethylene
market for waste polyethylene	-0.0827551	ecoinvent_cutoff_3.9_remind_SSP2-NPi_2025	IN	kilogram	technosphere	0		0	waste polyethylene
market for waste polyvinylchloride	-4.66493	ecoinvent_cutoff_3.9_remind_SSP2-NPi_2025	RoW	kilogram	technosphere	0		0	waste polyvinylchloride
market for waste polyvinylchloride	-0.044524	ecoinvent_cutoff_3.9_remind_SSP2-NPi_2025	CO	kilogram	technosphere	0		0	waste polyvinylchloride
market for waste polyvinylchloride	-0.00336728	ecoinvent_cutoff_3.9_remind_SSP2-NPi_2025	CY	kilogram	technosphere	0		0	waste polyvinylchloride
market for waste polyvinylchloride	-0.017463	ecoinvent_cutoff_3.9_remind_SSP2-NPi_2025	ZA	kilogram	technosphere	0		0	waste polyvinylchloride
market for waste polyvinylchloride	-0.00742936	ecoinvent_cutoff_3.9_remind_SSP2-NPi_2025	PE	kilogram	technosphere	0		0	waste polyvinylchloride
market for waste polyvinylchloride	-0.666366	ecoinvent_cutoff_3.9_remind_SSP2-NPi_2025	BR	kilogram	technosphere	0		0	waste polyvinylchloride
market for waste polyvinylchloride	-0.01839	ecoinvent_cutoff_3.9_remind_SSP2-NPi_2025	IN	kilogram	technosphere	0		0	waste polyvinylchloride
market for wire drawing, copper	1590	ecoinvent_cutoff_3.9_remind_SSP2-NPi_2025	GLO	kilogram	technosphere	0		0	wire drawing, copper
market group for electricity, medium voltage	67500	ecoinvent_cutoff_3.9_remind_SSP2-NPi_2025	GLO	kilowatt hour	technosphere	0		0	electricity, medium voltage
market group for waste glass	-4056.91	ecoinvent_cutoff_3.9_remind_SSP2-NPi_2025	RER	kilogram	technosphere	0		0	waste glass
market group for waste plastic, mixture	-1390.88	ecoinvent_cutoff_3.9_remind_SSP2-NPi_2025	RER	kilogram	technosphere	0		0	waste plastic, mixture
market group for waste polyethylene	-2.59888	ecoinvent_cutoff_3.9_remind_SSP2-NPi_2025	RER	kilogram	technosphere	0		0	waste polyethylene
market group for waste polyvinylchloride	-0.577528	ecoinvent_cutoff_3.9_remind_SSP2-NPi_2025	RER	kilogram	technosphere	0		0	waste polyvinylchloride
steel production, converter, low-alloyed, 2025	15900	steel_prod_SSP2-NPi_2025	World	kilogram	technosphere				steel, low-alloyed
steel production, from primary iron, chromium steel 18/8, optimistic, 2025	51600	steel_prod_SSP2-NPi_2025	World	kilogram	technosphere				steel, chromium steel 18/8
Activity	wind power plant construction, 2MW, offshore, moving parts, primary, pessimistic
code	92he91c63d117037c075b46b947eb7g3
comment	This dataset represents the moving parts of a 2 MW offshore wind power plant, based on the dimensions of an offshore wind power plant of the type Bonus 2 MW. [This dataset was already contained in the ecoinvent database version 2. It was not individually updated during the transfer to ecoinvent version 3. Life Cycle Impact Assessment results may still have changed, as they are affected by changes…
location	GLO
reference product	wind power plant, 2MW, offshore, moving parts
unit	unit
Exchanges
name	amount	database	location	unit	type	uncertainty type	loc	production volume	reference product
wind power plant construction, 2MW, offshore, moving parts, primary, pessimistic	1	Renewables_SSP2-NPi_2025	GLO	unit	production	0	1	175	wind power plant, 2MW, offshore, moving parts
aluminium scrap, new, Recycled Content cut-off	-845	ecoinvent_cutoff_3.9_remind_SSP2-NPi_2025	GLO	kilogram	technosphere	0	-845	0	aluminium scrap, new
market for aluminium, wrought alloy	845	ecoinvent_cutoff_3.9_remind_SSP2-NPi_2025	GLO	kilogram	technosphere	0		0	aluminium, wrought alloy
market for cast iron	26400	ecoinvent_cutoff_3.9_remind_SSP2-NPi_2025	GLO	kilogram	technosphere	0		0	cast iron
market for copper, cathode	1590	ecoinvent_cutoff_3.9_remind_SSP2-NPi_2025	GLO	kilogram	technosphere	0		0	copper, cathode
market for glass fibre reinforced plastic, polyamide, injection moulded	41000	ecoinvent_cutoff_3.9_remind_SSP2-NPi_2025	GLO	kilogram	technosphere	0		0	glass fibre reinforced plastic, polyamide, injection moulded
market for lead	0.5	ecoinvent_cutoff_3.9_remind_SSP2-NPi_2025	GLO	kilogram	technosphere	0		0	lead
market for lubricating oil	200.1	ecoinvent_cutoff_3.9_remind_SSP2-NPi_2025	RER	kilogram	technosphere	0		0	lubricating oil
market for lubricating oil	949.9	ecoinvent_cutoff_3.9_remind_SSP2-NPi_2025	RoW	kilogram	technosphere	0		0	lubricating oil
market for polyethylene, high density, granulate	27	ecoinvent_cutoff_3.9_remind_SSP2-NPi_2025	GLO	kilogram	technosphere	0		0	polyethylene, high density, granulate
market for polyvinylchloride, bulk polymerised	6	ecoinvent_cutoff_3.9_remind_SSP2-NPi_2025	GLO	kilogram	technosphere	0		0	polyvinylchloride, bulk polymerised
market for scrap copper	-23.6635	ecoinvent_cutoff_3.9_remind_SSP2-NPi_2025	CH	kilogram	technosphere	0	-23.6635	0	scrap copper
market for scrap copper	-1061.98	ecoinvent_cutoff_3.9_remind_SSP2-NPi_2025	RoW	kilogram	technosphere	0	-1061.98	0	scrap copper
market for scrap copper	-504.36	ecoinvent_cutoff_3.9_remind_SSP2-NPi_2025	Europe without Switzerland	kilogram	technosphere	0	-504.36	0	scrap copper
market for scrap steel	-28.9681	ecoinvent_cutoff_3.9_remind_SSP2-NPi_2025	CH	kilogram	technosphere	0		0	scrap steel
market for scrap steel	-71006.8	ecoinvent_cutoff_3.9_remind_SSP2-NPi_2025	RoW	kilogram	technosphere	0		0	scrap steel
market for scrap steel	-22864.2	ecoinvent_cutoff_3.9_remind_SSP2-NPi_2025	Europe without Switzerland	kilogram	technosphere	0		0	scrap steel
market for section bar rolling, steel	42300	ecoinvent_cutoff_3.9_remind_SSP2-NPi_2025	GLO	kilogram	technosphere	0		0	section bar rolling, steel
market for sheet rolling, aluminium	845	ecoinvent_cutoff_3.9_remind_SSP2-NPi_2025	GLO	kilogram	technosphere	0		0	sheet rolling, aluminium
market for sheet rolling, chromium steel	51600	ecoinvent_cutoff_3.9_remind_SSP2-NPi_2025	GLO	kilogram	technosphere	0		0	sheet rolling, chromium steel
market for synthetic rubber	100	ecoinvent_cutoff_3.9_remind_SSP2-NPi_2025	GLO	kilogram	technosphere	0		0	synthetic rubber
market for tin	0.5	ecoinvent_cutoff_3.9_remind_SSP2-NPi_2025	GLO	kilogram	technosphere	0		0	tin
market for waste glass	-82.1792	ecoinvent_cutoff_3.9_remind_SSP2-NPi_2025	ZA	kilogram	technosphere	0		0	waste glass
market for waste glass	-27.8891	ecoinvent_cutoff_3.9_remind_SSP2-NPi_2025	PE	kilogram	technosphere	0		0	waste glass
market for waste glass	-2135.75	ecoinvent_cutoff_3.9_remind_SSP2-NPi_2025	BR	kilogram	technosphere	0		0	waste glass
market for waste glass	-18.3656	ecoinvent_cutoff_3.9_remind_SSP2-NPi_2025	IN	kilogram	technosphere	0		0	waste glass
market for waste glass	-196.847	ecoinvent_cutoff_3.9_remind_SSP2-NPi_2025	CO	kilogram	technosphere	0		0	waste glass
market for waste glass	-20127.6	ecoinvent_cutoff_3.9_remind_SSP2-NPi_2025	RoW	kilogram	technosphere	0		0	waste glass
market for waste glass	-4.4658	ecoinvent_cutoff_3.9_remind_SSP2-NPi_2025	CY	kilogram	technosphere	0		0	waste glass
market for waste mineral oil	-826.52	ecoinvent_cutoff_3.9_remind_SSP2-NPi_2025	RoW	kilogram	technosphere	0		0	waste mineral oil
market for waste mineral oil	-315.665	ecoinvent_cutoff_3.9_remind_SSP2-NPi_2025	Europe without Switzerland	kilogram	technosphere	0		0	waste mineral oil
market for waste mineral oil	-7.81461	ecoinvent_cutoff_3.9_remind_SSP2-NPi_2025	CH	kilogram	technosphere	0		0	waste mineral oil
market for waste plastic, mixture	-17.8924	ecoinvent_cutoff_3.9_remind_SSP2-NPi_2025	PE	kilogram	technosphere	0		0	waste plastic, mixture
market for waste plastic, mixture	-44.2893	ecoinvent_cutoff_3.9_remind_SSP2-NPi_2025	IN	kilogram	technosphere	0		0	waste plastic, mixture
market for waste plastic, mixture	-1604.83	ecoinvent_cutoff_3.9_remind_SSP2-NPi_2025	BR	kilogram	technosphere	0		0	waste plastic, mixture
market for waste plastic, mixture	-11234.7	ecoinvent_cutoff_3.9_remind_SSP2-NPi_2025	RoW	kilogram	technosphere	0		0	waste plastic, mixture
market for waste plastic, mixture	-42.0568	ecoinvent_cutoff_3.9_remind_SSP2-NPi_2025	ZA	kilogram	technosphere	0		0	waste plastic, mixture
market for waste plastic, mixture	-107.229	ecoinvent_cutoff_3.9_remind_SSP2-NPi_2025	CO	kilogram	technosphere	0		0	waste plastic, mixture
market for waste plastic, mixture	-8.10953	ecoinvent_cutoff_3.9_remind_SSP2-NPi_2025	CY	kilogram	technosphere	0		0	waste plastic, mixture
market for waste polyethylene	-2.99865	ecoinvent_cutoff_3.9_remind_SSP2-NPi_2025	BR	kilogram	technosphere	0		0	waste polyethylene
market for waste polyethylene	-0.200358	ecoinvent_cutoff_3.9_remind_SSP2-NPi_2025	CO	kilogram	technosphere	0		0	waste polyethylene
market for waste polyethylene	-0.0785837	ecoinvent_cutoff_3.9_remind_SSP2-NPi_2025	ZA	kilogram	technosphere	0		0	waste polyethylene
market for waste polyethylene	-20.9922	ecoinvent_cutoff_3.9_remind_SSP2-NPi_2025	RoW	kilogram	technosphere	0		0	waste polyethylene
market for waste polyethylene	-0.0151528	ecoinvent_cutoff_3.9_remind_SSP2-NPi_2025	CY	kilogram	technosphere	0		0	waste polyethylene
market for waste polyethylene	-0.0334321	ecoinvent_cutoff_3.9_remind_SSP2-NPi_2025	PE	kilogram	technosphere	0		0	waste polyethylene
market for waste polyethylene	-0.0827551	ecoinvent_cutoff_3.9_remind_SSP2-NPi_2025	IN	kilogram	technosphere	0		0	waste polyethylene
market for waste polyvinylchloride	-4.66493	ecoinvent_cutoff_3.9_remind_SSP2-NPi_2025	RoW	kilogram	technosphere	0		0	waste polyvinylchloride
market for waste polyvinylchloride	-0.044524	ecoinvent_cutoff_3.9_remind_SSP2-NPi_2025	CO	kilogram	technosphere	0		0	waste polyvinylchloride
market for waste polyvinylchloride	-0.00336728	ecoinvent_cutoff_3.9_remind_SSP2-NPi_2025	CY	kilogram	technosphere	0		0	waste polyvinylchloride
market for waste polyvinylchloride	-0.017463	ecoinvent_cutoff_3.9_remind_SSP2-NPi_2025	ZA	kilogram	technosphere	0		0	waste polyvinylchloride
market for waste polyvinylchloride	-0.00742936	ecoinvent_cutoff_3.9_remind_SSP2-NPi_2025	PE	kilogram	technosphere	0		0	waste polyvinylchloride
market for waste polyvinylchloride	-0.666366	ecoinvent_cutoff_3.9_remind_SSP2-NPi_2025	BR	kilogram	technosphere	0		0	waste polyvinylchloride
market for waste polyvinylchloride	-0.01839	ecoinvent_cutoff_3.9_remind_SSP2-NPi_2025	IN	kilogram	technosphere	0		0	waste polyvinylchloride
market for wire drawing, copper	1590	ecoinvent_cutoff_3.9_remind_SSP2-NPi_2025	GLO	kilogram	technosphere	0		0	wire drawing, copper
market group for electricity, medium voltage	67500	ecoinvent_cutoff_3.9_remind_SSP2-NPi_2025	GLO	kilowatt hour	technosphere	0		0	electricity, medium voltage
market group for waste glass	-4056.91	ecoinvent_cutoff_3.9_remind_SSP2-NPi_2025	RER	kilogram	technosphere	0		0	waste glass
market group for waste plastic, mixture	-1390.88	ecoinvent_cutoff_3.9_remind_SSP2-NPi_2025	RER	kilogram	technosphere	0		0	waste plastic, mixture
market group for waste polyethylene	-2.59888	ecoinvent_cutoff_3.9_remind_SSP2-NPi_2025	RER	kilogram	technosphere	0		0	waste polyethylene
market group for waste polyvinylchloride	-0.577528	ecoinvent_cutoff_3.9_remind_SSP2-NPi_2025	RER	kilogram	technosphere	0		0	waste polyvinylchloride
steel production, converter, low-alloyed, 2025	15900	steel_prod_SSP2-NPi_2025	World	kilogram	technosphere				steel, low-alloyed
steel production, from primary iron, chromium steel 18/8, pessimistic, 2025	51600	steel_prod_SSP2-NPi_2025	World	kilogram	technosphere				steel, chromium steel 18/8
Activity	wind power plant construction, 2MW, offshore, moving parts, secondary, optimistic
code	7d1e91c63d117037c075b46b947eb11f_copy1
comment	This dataset represents the moving parts of a 2 MW offshore wind power plant, based on the dimensions of an offshore wind power plant of the type Bonus 2 MW. [This dataset was already contained in the ecoinvent database version 2. It was not individually updated during the transfer to ecoinvent version 3. Life Cycle Impact Assessment results may still have changed, as they are affected by changes…
location	GLO
reference product	wind power plant, 2MW, offshore, moving parts
unit	unit
Exchanges
name	amount	database	location	unit	type	uncertainty type	loc	production volume	reference product
wind power plant construction, 2MW, offshore, moving parts, secondary, optimistic	1	Renewables_SSP2-NPi_2025	GLO	unit	production	0	1	175	wind power plant, 2MW, offshore, moving parts
aluminium scrap, new, Recycled Content cut-off	-845	ecoinvent_cutoff_3.9_remind_SSP2-NPi_2025	GLO	kilogram	technosphere	0	-845	0	aluminium scrap, new
steel production, electric, chromium steel 18/8, optimistic, 2025	51600	steel_prod_SSP2-NPi_2025	World	kilogram	technosphere				steel, chromium steel 18/8
steel production, electric, low-alloyed, optimistic, 2025	15900	steel_prod_SSP2-NPi_2025	World	kilogram	technosphere				steel, low-alloyed
market for aluminium, wrought alloy	845	ecoinvent_cutoff_3.9_remind_SSP2-NPi_2025	GLO	kilogram	technosphere	0		0	aluminium, wrought alloy
market for cast iron	26400	ecoinvent_cutoff_3.9_remind_SSP2-NPi_2025	GLO	kilogram	technosphere	0		0	cast iron
market for copper, cathode	1590	ecoinvent_cutoff_3.9_remind_SSP2-NPi_2025	GLO	kilogram	technosphere	0		0	copper, cathode
market for glass fibre reinforced plastic, polyamide, injection moulded	41000	ecoinvent_cutoff_3.9_remind_SSP2-NPi_2025	GLO	kilogram	technosphere	0		0	glass fibre reinforced plastic, polyamide, injection moulded
market for lead	0.5	ecoinvent_cutoff_3.9_remind_SSP2-NPi_2025	GLO	kilogram	technosphere	0		0	lead
market for lubricating oil	200.1	ecoinvent_cutoff_3.9_remind_SSP2-NPi_2025	RER	kilogram	technosphere	0		0	lubricating oil
market for lubricating oil	949.9	ecoinvent_cutoff_3.9_remind_SSP2-NPi_2025	RoW	kilogram	technosphere	0		0	lubricating oil
market for polyethylene, high density, granulate	27	ecoinvent_cutoff_3.9_remind_SSP2-NPi_2025	GLO	kilogram	technosphere	0		0	polyethylene, high density, granulate
market for polyvinylchloride, bulk polymerised	6	ecoinvent_cutoff_3.9_remind_SSP2-NPi_2025	GLO	kilogram	technosphere	0		0	polyvinylchloride, bulk polymerised
market for scrap copper	-23.6635	ecoinvent_cutoff_3.9_remind_SSP2-NPi_2025	CH	kilogram	technosphere	0	-23.6635	0	scrap copper
market for scrap copper	-1061.98	ecoinvent_cutoff_3.9_remind_SSP2-NPi_2025	RoW	kilogram	technosphere	0	-1061.98	0	scrap copper
market for scrap copper	-504.36	ecoinvent_cutoff_3.9_remind_SSP2-NPi_2025	Europe without Switzerland	kilogram	technosphere	0	-504.36	0	scrap copper
market for scrap steel	-28.9681	ecoinvent_cutoff_3.9_remind_SSP2-NPi_2025	CH	kilogram	technosphere	0		0	scrap steel
market for scrap steel	-71006.8	ecoinvent_cutoff_3.9_remind_SSP2-NPi_2025	RoW	kilogram	technosphere	0		0	scrap steel
market for scrap steel	-22864.2	ecoinvent_cutoff_3.9_remind_SSP2-NPi_2025	Europe without Switzerland	kilogram	technosphere	0		0	scrap steel
market for section bar rolling, steel	42300	ecoinvent_cutoff_3.9_remind_SSP2-NPi_2025	GLO	kilogram	technosphere	0		0	section bar rolling, steel
market for sheet rolling, aluminium	845	ecoinvent_cutoff_3.9_remind_SSP2-NPi_2025	GLO	kilogram	technosphere	0		0	sheet rolling, aluminium
market for sheet rolling, chromium steel	51600	ecoinvent_cutoff_3.9_remind_SSP2-NPi_2025	GLO	kilogram	technosphere	0		0	sheet rolling, chromium steel
market for synthetic rubber	100	ecoinvent_cutoff_3.9_remind_SSP2-NPi_2025	GLO	kilogram	technosphere	0		0	synthetic rubber
market for tin	0.5	ecoinvent_cutoff_3.9_remind_SSP2-NPi_2025	GLO	kilogram	technosphere	0		0	tin
market for waste glass	-82.1792	ecoinvent_cutoff_3.9_remind_SSP2-NPi_2025	ZA	kilogram	technosphere	0		0	waste glass
market for waste glass	-27.8891	ecoinvent_cutoff_3.9_remind_SSP2-NPi_2025	PE	kilogram	technosphere	0		0	waste glass
market for waste glass	-2135.75	ecoinvent_cutoff_3.9_remind_SSP2-NPi_2025	BR	kilogram	technosphere	0		0	waste glass
market for waste glass	-18.3656	ecoinvent_cutoff_3.9_remind_SSP2-NPi_2025	IN	kilogram	technosphere	0		0	waste glass
market for waste glass	-196.847	ecoinvent_cutoff_3.9_remind_SSP2-NPi_2025	CO	kilogram	technosphere	0		0	waste glass
market for waste glass	-20127.6	ecoinvent_cutoff_3.9_remind_SSP2-NPi_2025	RoW	kilogram	technosphere	0		0	waste glass
market for waste glass	-4.4658	ecoinvent_cutoff_3.9_remind_SSP2-NPi_2025	CY	kilogram	technosphere	0		0	waste glass
market for waste mineral oil	-826.52	ecoinvent_cutoff_3.9_remind_SSP2-NPi_2025	RoW	kilogram	technosphere	0		0	waste mineral oil
market for waste mineral oil	-315.665	ecoinvent_cutoff_3.9_remind_SSP2-NPi_2025	Europe without Switzerland	kilogram	technosphere	0		0	waste mineral oil
market for waste mineral oil	-7.81461	ecoinvent_cutoff_3.9_remind_SSP2-NPi_2025	CH	kilogram	technosphere	0		0	waste mineral oil
market for waste plastic, mixture	-17.8924	ecoinvent_cutoff_3.9_remind_SSP2-NPi_2025	PE	kilogram	technosphere	0		0	waste plastic, mixture
market for waste plastic, mixture	-44.2893	ecoinvent_cutoff_3.9_remind_SSP2-NPi_2025	IN	kilogram	technosphere	0		0	waste plastic, mixture
market for waste plastic, mixture	-1604.83	ecoinvent_cutoff_3.9_remind_SSP2-NPi_2025	BR	kilogram	technosphere	0		0	waste plastic, mixture
market for waste plastic, mixture	-11234.7	ecoinvent_cutoff_3.9_remind_SSP2-NPi_2025	RoW	kilogram	technosphere	0		0	waste plastic, mixture
market for waste plastic, mixture	-42.0568	ecoinvent_cutoff_3.9_remind_SSP2-NPi_2025	ZA	kilogram	technosphere	0		0	waste plastic, mixture
market for waste plastic, mixture	-107.229	ecoinvent_cutoff_3.9_remind_SSP2-NPi_2025	CO	kilogram	technosphere	0		0	waste plastic, mixture
market for waste plastic, mixture	-8.10953	ecoinvent_cutoff_3.9_remind_SSP2-NPi_2025	CY	kilogram	technosphere	0		0	waste plastic, mixture
market for waste polyethylene	-2.99865	ecoinvent_cutoff_3.9_remind_SSP2-NPi_2025	BR	kilogram	technosphere	0		0	waste polyethylene
market for waste polyethylene	-0.200358	ecoinvent_cutoff_3.9_remind_SSP2-NPi_2025	CO	kilogram	technosphere	0		0	waste polyethylene
market for waste polyethylene	-0.0785837	ecoinvent_cutoff_3.9_remind_SSP2-NPi_2025	ZA	kilogram	technosphere	0		0	waste polyethylene
market for waste polyethylene	-20.9922	ecoinvent_cutoff_3.9_remind_SSP2-NPi_2025	RoW	kilogram	technosphere	0		0	waste polyethylene
market for waste polyethylene	-0.0151528	ecoinvent_cutoff_3.9_remind_SSP2-NPi_2025	CY	kilogram	technosphere	0		0	waste polyethylene
market for waste polyethylene	-0.0334321	ecoinvent_cutoff_3.9_remind_SSP2-NPi_2025	PE	kilogram	technosphere	0		0	waste polyethylene
market for waste polyethylene	-0.0827551	ecoinvent_cutoff_3.9_remind_SSP2-NPi_2025	IN	kilogram	technosphere	0		0	waste polyethylene
market for waste polyvinylchloride	-4.66493	ecoinvent_cutoff_3.9_remind_SSP2-NPi_2025	RoW	kilogram	technosphere	0		0	waste polyvinylchloride
market for waste polyvinylchloride	-0.044524	ecoinvent_cutoff_3.9_remind_SSP2-NPi_2025	CO	kilogram	technosphere	0		0	waste polyvinylchloride
market for waste polyvinylchloride	-0.00336728	ecoinvent_cutoff_3.9_remind_SSP2-NPi_2025	CY	kilogram	technosphere	0		0	waste polyvinylchloride
market for waste polyvinylchloride	-0.017463	ecoinvent_cutoff_3.9_remind_SSP2-NPi_2025	ZA	kilogram	technosphere	0		0	waste polyvinylchloride
market for waste polyvinylchloride	-0.00742936	ecoinvent_cutoff_3.9_remind_SSP2-NPi_2025	PE	kilogram	technosphere	0		0	waste polyvinylchloride
market for waste polyvinylchloride	-0.666366	ecoinvent_cutoff_3.9_remind_SSP2-NPi_2025	BR	kilogram	technosphere	0		0	waste polyvinylchloride
market for waste polyvinylchloride	-0.01839	ecoinvent_cutoff_3.9_remind_SSP2-NPi_2025	IN	kilogram	technosphere	0		0	waste polyvinylchloride
market for wire drawing, copper	1590	ecoinvent_cutoff_3.9_remind_SSP2-NPi_2025	GLO	kilogram	technosphere	0		0	wire drawing, copper
market group for electricity, medium voltage	67500	ecoinvent_cutoff_3.9_remind_SSP2-NPi_2025	GLO	kilowatt hour	technosphere	0		0	electricity, medium voltage
market group for waste glass	-4056.91	ecoinvent_cutoff_3.9_remind_SSP2-NPi_2025	RER	kilogram	technosphere	0		0	waste glass
market group for waste plastic, mixture	-1390.88	ecoinvent_cutoff_3.9_remind_SSP2-NPi_2025	RER	kilogram	technosphere	0		0	waste plastic, mixture
market group for waste polyethylene	-2.59888	ecoinvent_cutoff_3.9_remind_SSP2-NPi_2025	RER	kilogram	technosphere	0		0	waste polyethylene
market group for waste polyvinylchloride	-0.577528	ecoinvent_cutoff_3.9_remind_SSP2-NPi_2025	RER	kilogram	technosphere	0		0	waste polyvinylchloride
Activity	wind turbine construction, 2MW, offshore, primary, optimistic
code	71a7b56f5ba449bb93dec2d331ee091e
location	GLO
reference product	wind turbine construction, 2MW, offshore, primary
type	process
unit	unit
Exchanges
name	amount	database	location	unit	type	reference product
wind turbine construction, 2MW, offshore, primary, optimistic	1	Renewables_SSP2-NPi_2025	GLO	unit	production	wind turbine construction, 2MW, offshore, primary
wind power plant construction, 2MW, offshore, fixed parts, primary	1	Renewables_SSP2-NPi_2025	GLO	unit	technosphere	wind power plant, 2MW, offshore, fixed parts
wind power plant construction, 2MW, offshore, moving parts, primary, optimistic	1	Renewables_SSP2-NPi_2025	GLO	unit	technosphere	wind power plant, 2MW, offshore, moving parts
Activity	wind turbine construction, 2MW, offshore, primary, pessimistic
code	02j7b56f5ba449bb93dec2d331ee08fh
location	GLO
reference product	wind turbine construction, 2MW, offshore, primary
type	process
unit	unit
Exchanges
name	amount	database	location	unit	type	reference product
wind turbine construction, 2MW, offshore, primary, pessimistic	1	Renewables_SSP2-NPi_2025	GLO	unit	production	wind turbine construction, 2MW, offshore, primary
wind power plant construction, 2MW, offshore, fixed parts, primary	1	Renewables_SSP2-NPi_2025	GLO	unit	technosphere	wind power plant, 2MW, offshore, fixed parts
wind power plant construction, 2MW, offshore, moving parts, primary, pessimistic	1	Renewables_SSP2-NPi_2025	GLO	unit	technosphere	wind power plant, 2MW, offshore, moving parts
Activity	wind turbine construction, 2MW, offshore, secondary, optimistic
code	305f34e1a1bb4031b23130110bcc5836
location	GLO
reference product	wind turbine, 2MW, offshore
type	process
unit	unit
Exchanges
name	amount	database	location	unit	type	reference product
wind turbine construction, 2MW, offshore, secondary, optimistic	1	Renewables_SSP2-NPi_2025	GLO	unit	production	wind turbine, 2MW, offshore
wind power plant construction, 2MW, offshore, fixed parts, secondary, optimistic	1	Renewables_SSP2-NPi_2025	GLO	unit	technosphere	wind power plant, 2MW, offshore, fixed parts
wind power plant construction, 2MW, offshore, moving parts, secondary, optimistic	1	Renewables_SSP2-NPi_2025	GLO	unit	technosphere	wind power plant, 2MW, offshore, moving parts
Activity	wind turbine construction, 4.5MW, onshore, primary, optimistic
code	34w0e38c72bb9kv42e15bdc6493hfc6c
comment	This dataset represents the construction of a wind turbine with a capacity of 4.5MW for onshore use. The term "wind turbine" inludes moving parts such as nacelle, rotor, rotor blades, transition piece as well as fixed parts such as the tower and the foundation. Reference technology for this wind turbine is an Enercon E-112 turbine. The tower is made of reinforced concrete, a relatively new techno…
location	GLO
reference product	wind turbine, 4.5MW, onshore
unit	unit
Exchanges
name	amount	database	location	unit	categories	type	uncertainty type	loc	production volume	reference product
Occupation, industrial area	6280	biosphere3		square meter-year	natural resource::land	biosphere	0	6280	0
Transformation, from pasture, man made	314	biosphere3		square meter	natural resource::land	biosphere	0		0
Transformation, to industrial area	314	biosphere3		square meter	natural resource::land	biosphere	0	314	0
wind turbine construction, 4.5MW, onshore, primary, optimistic	1	Renewables_SSP2-NPi_2025	GLO	unit		production	0	1	633.904	wind turbine, 4.5MW, onshore
aluminium scrap, post-consumer, Recycled Content cut-off	-973.298	ecoinvent_cutoff_3.9_remind_SSP2-NPi_2025	GLO	kilogram		technosphere	0	-973.298	0	aluminium scrap, post-consumer
iron scrap, unsorted, Recycled Content cut-off	-100258	ecoinvent_cutoff_3.9_remind_SSP2-NPi_2025	GLO	kilogram		technosphere	0	-100258	0	iron scrap, unsorted
market for alkyd paint, white, without water, in 60% solution state	6260.93	ecoinvent_cutoff_3.9_remind_SSP2-NPi_2025	RoW	kilogram		technosphere	0		0	alkyd paint, white, without water, in 60% solution state
market for alkyd paint, white, without water, in 60% solution state	1318.89	ecoinvent_cutoff_3.9_remind_SSP2-NPi_2025	RER	kilogram		technosphere	0		0	alkyd paint, white, without water, in 60% solution state
market for aluminium, cast alloy	311.455	ecoinvent_cutoff_3.9_remind_SSP2-NPi_2025	GLO	kilogram		technosphere	0		0	aluminium, cast alloy
market for aluminium, wrought alloy	661.843	ecoinvent_cutoff_3.9_remind_SSP2-NPi_2025	GLO	kilogram		technosphere	0		0	aluminium, wrought alloy
market for cast iron	100258	ecoinvent_cutoff_3.9_remind_SSP2-NPi_2025	GLO	kilogram		technosphere	0		0	cast iron
market for copper, cathode	44252.2	ecoinvent_cutoff_3.9_remind_SSP2-NPi_2025	GLO	kilogram		technosphere	0		0	copper, cathode
market for electronics scrap from control units	-572.165	ecoinvent_cutoff_3.9_remind_SSP2-NPi_2025	GLO	kilogram		technosphere	0	-572.165	0	electronics scrap from control units
market for electronics, for control units	572.165	ecoinvent_cutoff_3.9_remind_SSP2-NPi_2025	GLO	kilogram		technosphere	0		0	electronics, for control units
market for epoxy resin, liquid	13954.9	ecoinvent_cutoff_3.9_remind_SSP2-NPi_2025	RoW	kilogram		technosphere	0	13954.9	0	epoxy resin, liquid
market for epoxy resin, liquid	2939.64	ecoinvent_cutoff_3.9_remind_SSP2-NPi_2025	RER	kilogram		technosphere	0	2939.64	0	epoxy resin, liquid
market for excavation, hydraulic digger	628	ecoinvent_cutoff_3.9_remind_SSP2-NPi_2025	GLO	cubic meter		technosphere	0		0	excavation, hydraulic digger
market for glass fibre reinforced plastic, polyamide, injection moulded	45780.9	ecoinvent_cutoff_3.9_remind_SSP2-NPi_2025	GLO	kilogram		technosphere	0		0	glass fibre reinforced plastic, polyamide, injection moulded
market for polyethylene, high density, granulate	2540.86	ecoinvent_cutoff_3.9_remind_SSP2-NPi_2025	GLO	kilogram		technosphere	0		0	polyethylene, high density, granulate
market for polyvinylchloride, emulsion polymerised	583.29	ecoinvent_cutoff_3.9_remind_SSP2-NPi_2025	GLO	kilogram		technosphere	0		0	polyvinylchloride, emulsion polymerised
market for polyvinylchloride, suspension polymerised	3985.8	ecoinvent_cutoff_3.9_remind_SSP2-NPi_2025	GLO	kilogram		technosphere	0		0	polyvinylchloride, suspension polymerised
market for road	8000	ecoinvent_cutoff_3.9_remind_SSP2-NPi_2025	GLO	meter-year		technosphere	0		0	road
market for scrap copper	-658.593	ecoinvent_cutoff_3.9_remind_SSP2-NPi_2025	CH	kilogram		technosphere	0	-658.593	0	scrap copper
market for scrap copper	-29556.5	ecoinvent_cutoff_3.9_remind_SSP2-NPi_2025	RoW	kilogram		technosphere	0	-29556.5	0	scrap copper
market for scrap copper	-14037.2	ecoinvent_cutoff_3.9_remind_SSP2-NPi_2025	Europe without Switzerland	kilogram		technosphere	0	-14037.2	0	scrap copper
market for scrap steel	-50.721	ecoinvent_cutoff_3.9_remind_SSP2-NPi_2025	CH	kilogram		technosphere	0	-50.721	0	scrap steel
market for scrap steel	-124328	ecoinvent_cutoff_3.9_remind_SSP2-NPi_2025	RoW	kilogram		technosphere	0	-124328	0	scrap steel
market for scrap steel	-40033.5	ecoinvent_cutoff_3.9_remind_SSP2-NPi_2025	Europe without Switzerland	kilogram		technosphere	0	-40033.5	0	scrap steel
market for sheet rolling, aluminium	973.298	ecoinvent_cutoff_3.9_remind_SSP2-NPi_2025	GLO	kilogram		technosphere	0	973.298	0	sheet rolling, aluminium
market for sheet rolling, chromium steel	6403.49	ecoinvent_cutoff_3.9_remind_SSP2-NPi_2025	GLO	kilogram		technosphere	0	6403.49	0	sheet rolling, chromium steel
market for sheet rolling, steel	158008	ecoinvent_cutoff_3.9_remind_SSP2-NPi_2025	GLO	kilogram		technosphere	0	158008	0	sheet rolling, steel
market for synthetic rubber	612.927	ecoinvent_cutoff_3.9_remind_SSP2-NPi_2025	GLO	kilogram		technosphere	0		0	synthetic rubber
market for waste glass	-70.586	ecoinvent_cutoff_3.9_remind_SSP2-NPi_2025	ZA	kilogram		technosphere	0	-70.586	0	waste glass
market for waste glass	-23.9548	ecoinvent_cutoff_3.9_remind_SSP2-NPi_2025	PE	kilogram		technosphere	0	-23.9548	0	waste glass
market for waste glass	-1834.45	ecoinvent_cutoff_3.9_remind_SSP2-NPi_2025	BR	kilogram		technosphere	0	-1834.45	0	waste glass
market for waste glass	-15.7747	ecoinvent_cutoff_3.9_remind_SSP2-NPi_2025	IN	kilogram		technosphere	0	-15.7747	0	waste glass
market for waste glass	-169.078	ecoinvent_cutoff_3.9_remind_SSP2-NPi_2025	CO	kilogram		technosphere	0	-169.078	0	waste glass
market for waste glass	-17288.2	ecoinvent_cutoff_3.9_remind_SSP2-NPi_2025	RoW	kilogram		technosphere	0	-17288.2	0	waste glass
market for waste glass	-3.8358	ecoinvent_cutoff_3.9_remind_SSP2-NPi_2025	CY	kilogram		technosphere	0	-3.8358	0	waste glass
market for waste paint on metal	-43.5054	ecoinvent_cutoff_3.9_remind_SSP2-NPi_2025	CH	kilogram		technosphere	0	-43.5054	0	waste paint on metal
market for waste paint on metal	-5125.32	ecoinvent_cutoff_3.9_remind_SSP2-NPi_2025	RoW	kilogram		technosphere	0	-5125.32	0	waste paint on metal
market for waste paint on wall	-2411	ecoinvent_cutoff_3.9_remind_SSP2-NPi_2025	GLO	kilogram		technosphere	0	-2411	0	waste paint on wall
market for waste plastic, mixture	-28.3435	ecoinvent_cutoff_3.9_remind_SSP2-NPi_2025	PE	kilogram		technosphere	0	-28.3435	0	waste plastic, mixture
market for waste plastic, mixture	-70.1592	ecoinvent_cutoff_3.9_remind_SSP2-NPi_2025	IN	kilogram		technosphere	0	-70.1592	0	waste plastic, mixture
market for waste plastic, mixture	-2542.24	ecoinvent_cutoff_3.9_remind_SSP2-NPi_2025	BR	kilogram		technosphere	0	-2542.24	0	waste plastic, mixture
market for waste plastic, mixture	-17797.1	ecoinvent_cutoff_3.9_remind_SSP2-NPi_2025	RoW	kilogram		technosphere	0	-17797.1	0	waste plastic, mixture
market for waste plastic, mixture	-66.6228	ecoinvent_cutoff_3.9_remind_SSP2-NPi_2025	ZA	kilogram		technosphere	0	-66.6228	0	waste plastic, mixture
market for waste plastic, mixture	-169.862	ecoinvent_cutoff_3.9_remind_SSP2-NPi_2025	CO	kilogram		technosphere	0	-169.862	0	waste plastic, mixture
market for waste plastic, mixture	-12.8464	ecoinvent_cutoff_3.9_remind_SSP2-NPi_2025	CY	kilogram		technosphere	0	-12.8464	0	waste plastic, mixture
market for waste polyethylene	-282.191	ecoinvent_cutoff_3.9_remind_SSP2-NPi_2025	BR	kilogram		technosphere	0	-282.191	0	waste polyethylene
market for waste polyethylene	-18.8549	ecoinvent_cutoff_3.9_remind_SSP2-NPi_2025	CO	kilogram		technosphere	0	-18.8549	0	waste polyethylene
market for waste polyethylene	-7.39519	ecoinvent_cutoff_3.9_remind_SSP2-NPi_2025	ZA	kilogram		technosphere	0	-7.39519	0	waste polyethylene
market for waste polyethylene	-1975.49	ecoinvent_cutoff_3.9_remind_SSP2-NPi_2025	RoW	kilogram		technosphere	0	-1975.49	0	waste polyethylene
market for waste polyethylene	-1.42597	ecoinvent_cutoff_3.9_remind_SSP2-NPi_2025	CY	kilogram		technosphere	0	-1.42597	0	waste polyethylene
market for waste polyethylene	-3.14616	ecoinvent_cutoff_3.9_remind_SSP2-NPi_2025	PE	kilogram		technosphere	0	-3.14616	0	waste polyethylene
market for waste polyethylene	-7.78775	ecoinvent_cutoff_3.9_remind_SSP2-NPi_2025	IN	kilogram		technosphere	0	-7.78775	0	waste polyethylene
market for waste polyethylene/polypropylene product	-4738.8	ecoinvent_cutoff_3.9_remind_SSP2-NPi_2025	Europe without Switzerland	kilogram		technosphere	0	-4738.8	0	waste polyethylene/polypropylene product
market for waste polyethylene/polypropylene product	-142.199	ecoinvent_cutoff_3.9_remind_SSP2-NPi_2025	CH	kilogram		technosphere	0	-142.199	0	waste polyethylene/polypropylene product
market for waste polyethylene/polypropylene product	-12013.5	ecoinvent_cutoff_3.9_remind_SSP2-NPi_2025	RoW	kilogram		technosphere	0	-12013.5	0	waste polyethylene/polypropylene product
market for waste polyvinylchloride	-3552.42	ecoinvent_cutoff_3.9_remind_SSP2-NPi_2025	RoW	kilogram		technosphere	0	-3552.42	0	waste polyvinylchloride
market for waste polyvinylchloride	-33.9057	ecoinvent_cutoff_3.9_remind_SSP2-NPi_2025	CO	kilogram		technosphere	0	-33.9057	0	waste polyvinylchloride
market for waste polyvinylchloride	-2.56424	ecoinvent_cutoff_3.9_remind_SSP2-NPi_2025	CY	kilogram		technosphere	0	-2.56424	0	waste polyvinylchloride
market for waste polyvinylchloride	-13.2984	ecoinvent_cutoff_3.9_remind_SSP2-NPi_2025	ZA	kilogram		technosphere	0	-13.2984	0	waste polyvinylchloride
market for waste polyvinylchloride	-5.65757	ecoinvent_cutoff_3.9_remind_SSP2-NPi_2025	PE	kilogram		technosphere	0	-5.65757	0	waste polyvinylchloride
market for waste polyvinylchloride	-507.448	ecoinvent_cutoff_3.9_remind_SSP2-NPi_2025	BR	kilogram		technosphere	0	-507.448	0	waste polyvinylchloride
market for waste polyvinylchloride	-14.0043	ecoinvent_cutoff_3.9_remind_SSP2-NPi_2025	IN	kilogram		technosphere	0	-14.0043	0	waste polyvinylchloride
market for waste reinforced concrete	-5495.82	ecoinvent_cutoff_3.9_remind_SSP2-NPi_2025	CH	kilogram		technosphere	0	-5495.82	0	waste reinforced concrete
market for waste reinforced concrete	-7.40249e+06	ecoinvent_cutoff_3.9_remind_SSP2-NPi_2025	RoW	kilogram		technosphere	0	-7.40249e+06	0	waste reinforced concrete
market for waste reinforced concrete	-518682	ecoinvent_cutoff_3.9_remind_SSP2-NPi_2025	Europe without Switzerland	kilogram		technosphere	0	-518682	0	waste reinforced concrete
market for waste rubber, unspecified	-300.163	ecoinvent_cutoff_3.9_remind_SSP2-NPi_2025	RoW	kilogram		technosphere	0	-300.163	0	waste rubber, unspecified
market for waste rubber, unspecified	-300.163	ecoinvent_cutoff_3.9_remind_SSP2-NPi_2025	Europe without Switzerland	kilogram		technosphere	0	-300.163	0	waste rubber, unspecified
market for waste rubber, unspecified	-12.6008	ecoinvent_cutoff_3.9_remind_SSP2-NPi_2025	CH	kilogram		technosphere	0	-12.6008	0	waste rubber, unspecified
market for wire drawing, copper	44252.2	ecoinvent_cutoff_3.9_remind_SSP2-NPi_2025	GLO	kilogram		technosphere	0	44252.2	0	wire drawing, copper
market group for concrete, normal strength	3086.33	ecoinvent_cutoff_3.9_remind_SSP2-NPi_2025	GLO	cubic meter		technosphere	0		0	concrete, normal strength
market group for electricity, medium voltage	445224	ecoinvent_cutoff_3.9_remind_SSP2-NPi_2025	GLO	kilowatt hour		technosphere	0		0	electricity, medium voltage
market group for waste glass	-3484.6	ecoinvent_cutoff_3.9_remind_SSP2-NPi_2025	RER	kilogram		technosphere	0	-3484.6	0	waste glass
market group for waste plastic, mixture	-2203.31	ecoinvent_cutoff_3.9_remind_SSP2-NPi_2025	RER	kilogram		technosphere	0	-2203.31	0	waste plastic, mixture
market group for waste polyethylene	-244.57	ecoinvent_cutoff_3.9_remind_SSP2-NPi_2025	RER	kilogram		technosphere	0	-244.57	0	waste polyethylene
market group for waste polyvinylchloride	-439.797	ecoinvent_cutoff_3.9_remind_SSP2-NPi_2025	RER	kilogram		technosphere	0	-439.797	0	waste polyvinylchloride
reinforcing steel production, converter, 2025	519470	steel_prod_SSP2-NPi_2025	GLO	kilogram		technosphere				reinforcing steel
steel production, converter, low-alloyed, 2025	158008	steel_prod_SSP2-NPi_2025	World	kilogram		technosphere				steel, low-alloyed
steel production, from primary iron, chromium steel 18/8, optimistic, 2025	6403.49	steel_prod_SSP2-NPi_2025	World	kilogram		technosphere				steel, chromium steel 18/8
Activity	wind turbine construction, 4.5MW, onshore, primary, pessimistic
code	82f0e38c72bb96f42e15bdc646bcf8g2
comment	This dataset represents the construction of a wind turbine with a capacity of 4.5MW for onshore use. The term "wind turbine" inludes moving parts such as nacelle, rotor, rotor blades, transition piece as well as fixed parts such as the tower and the foundation. Reference technology for this wind turbine is an Enercon E-112 turbine. The tower is made of reinforced concrete, a relatively new techno…
location	GLO
reference product	wind turbine, 4.5MW, onshore
unit	unit
Exchanges
name	amount	database	location	unit	categories	type	uncertainty type	loc	production volume	reference product
Occupation, industrial area	6280	biosphere3		square meter-year	natural resource::land	biosphere	0	6280	0
Transformation, from pasture, man made	314	biosphere3		square meter	natural resource::land	biosphere	0		0
Transformation, to industrial area	314	biosphere3		square meter	natural resource::land	biosphere	0	314	0
wind turbine construction, 4.5MW, onshore, primary, pessimistic	1	Renewables_SSP2-NPi_2025	GLO	unit		production	0	1	633.904	wind turbine, 4.5MW, onshore
aluminium scrap, post-consumer, Recycled Content cut-off	-973.298	ecoinvent_cutoff_3.9_remind_SSP2-NPi_2025	GLO	kilogram		technosphere	0	-973.298	0	aluminium scrap, post-consumer
iron scrap, unsorted, Recycled Content cut-off	-100258	ecoinvent_cutoff_3.9_remind_SSP2-NPi_2025	GLO	kilogram		technosphere	0	-100258	0	iron scrap, unsorted
market for alkyd paint, white, without water, in 60% solution state	6260.93	ecoinvent_cutoff_3.9_remind_SSP2-NPi_2025	RoW	kilogram		technosphere	0		0	alkyd paint, white, without water, in 60% solution state
market for alkyd paint, white, without water, in 60% solution state	1318.89	ecoinvent_cutoff_3.9_remind_SSP2-NPi_2025	RER	kilogram		technosphere	0		0	alkyd paint, white, without water, in 60% solution state
market for aluminium, cast alloy	311.455	ecoinvent_cutoff_3.9_remind_SSP2-NPi_2025	GLO	kilogram		technosphere	0		0	aluminium, cast alloy
market for aluminium, wrought alloy	661.843	ecoinvent_cutoff_3.9_remind_SSP2-NPi_2025	GLO	kilogram		technosphere	0		0	aluminium, wrought alloy
market for cast iron	100258	ecoinvent_cutoff_3.9_remind_SSP2-NPi_2025	GLO	kilogram		technosphere	0		0	cast iron
market for copper, cathode	44252.2	ecoinvent_cutoff_3.9_remind_SSP2-NPi_2025	GLO	kilogram		technosphere	0		0	copper, cathode
market for electronics scrap from control units	-572.165	ecoinvent_cutoff_3.9_remind_SSP2-NPi_2025	GLO	kilogram		technosphere	0	-572.165	0	electronics scrap from control units
market for electronics, for control units	572.165	ecoinvent_cutoff_3.9_remind_SSP2-NPi_2025	GLO	kilogram		technosphere	0		0	electronics, for control units
market for epoxy resin, liquid	13954.9	ecoinvent_cutoff_3.9_remind_SSP2-NPi_2025	RoW	kilogram		technosphere	0	13954.9	0	epoxy resin, liquid
market for epoxy resin, liquid	2939.64	ecoinvent_cutoff_3.9_remind_SSP2-NPi_2025	RER	kilogram		technosphere	0	2939.64	0	epoxy resin, liquid
market for excavation, hydraulic digger	628	ecoinvent_cutoff_3.9_remind_SSP2-NPi_2025	GLO	cubic meter		technosphere	0		0	excavation, hydraulic digger
market for glass fibre reinforced plastic, polyamide, injection moulded	45780.9	ecoinvent_cutoff_3.9_remind_SSP2-NPi_2025	GLO	kilogram		technosphere	0		0	glass fibre reinforced plastic, polyamide, injection moulded
market for polyethylene, high density, granulate	2540.86	ecoinvent_cutoff_3.9_remind_SSP2-NPi_2025	GLO	kilogram		technosphere	0		0	polyethylene, high density, granulate
market for polyvinylchloride, emulsion polymerised	583.29	ecoinvent_cutoff_3.9_remind_SSP2-NPi_2025	GLO	kilogram		technosphere	0		0	polyvinylchloride, emulsion polymerised
market for polyvinylchloride, suspension polymerised	3985.8	ecoinvent_cutoff_3.9_remind_SSP2-NPi_2025	GLO	kilogram		technosphere	0		0	polyvinylchloride, suspension polymerised
market for road	8000	ecoinvent_cutoff_3.9_remind_SSP2-NPi_2025	GLO	meter-year		technosphere	0		0	road
market for scrap copper	-658.593	ecoinvent_cutoff_3.9_remind_SSP2-NPi_2025	CH	kilogram		technosphere	0	-658.593	0	scrap copper
market for scrap copper	-29556.5	ecoinvent_cutoff_3.9_remind_SSP2-NPi_2025	RoW	kilogram		technosphere	0	-29556.5	0	scrap copper
market for scrap copper	-14037.2	ecoinvent_cutoff_3.9_remind_SSP2-NPi_2025	Europe without Switzerland	kilogram		technosphere	0	-14037.2	0	scrap copper
market for scrap steel	-50.721	ecoinvent_cutoff_3.9_remind_SSP2-NPi_2025	CH	kilogram		technosphere	0	-50.721	0	scrap steel
market for scrap steel	-124328	ecoinvent_cutoff_3.9_remind_SSP2-NPi_2025	RoW	kilogram		technosphere	0	-124328	0	scrap steel
market for scrap steel	-40033.5	ecoinvent_cutoff_3.9_remind_SSP2-NPi_2025	Europe without Switzerland	kilogram		technosphere	0	-40033.5	0	scrap steel
market for sheet rolling, aluminium	973.298	ecoinvent_cutoff_3.9_remind_SSP2-NPi_2025	GLO	kilogram		technosphere	0	973.298	0	sheet rolling, aluminium
market for sheet rolling, chromium steel	6403.49	ecoinvent_cutoff_3.9_remind_SSP2-NPi_2025	GLO	kilogram		technosphere	0	6403.49	0	sheet rolling, chromium steel
market for sheet rolling, steel	158008	ecoinvent_cutoff_3.9_remind_SSP2-NPi_2025	GLO	kilogram		technosphere	0	158008	0	sheet rolling, steel
market for synthetic rubber	612.927	ecoinvent_cutoff_3.9_remind_SSP2-NPi_2025	GLO	kilogram		technosphere	0		0	synthetic rubber
market for waste glass	-70.586	ecoinvent_cutoff_3.9_remind_SSP2-NPi_2025	ZA	kilogram		technosphere	0	-70.586	0	waste glass
market for waste glass	-23.9548	ecoinvent_cutoff_3.9_remind_SSP2-NPi_2025	PE	kilogram		technosphere	0	-23.9548	0	waste glass
market for waste glass	-1834.45	ecoinvent_cutoff_3.9_remind_SSP2-NPi_2025	BR	kilogram		technosphere	0	-1834.45	0	waste glass
market for waste glass	-15.7747	ecoinvent_cutoff_3.9_remind_SSP2-NPi_2025	IN	kilogram		technosphere	0	-15.7747	0	waste glass
market for waste glass	-169.078	ecoinvent_cutoff_3.9_remind_SSP2-NPi_2025	CO	kilogram		technosphere	0	-169.078	0	waste glass
market for waste glass	-17288.2	ecoinvent_cutoff_3.9_remind_SSP2-NPi_2025	RoW	kilogram		technosphere	0	-17288.2	0	waste glass
market for waste glass	-3.8358	ecoinvent_cutoff_3.9_remind_SSP2-NPi_2025	CY	kilogram		technosphere	0	-3.8358	0	waste glass
market for waste paint on metal	-43.5054	ecoinvent_cutoff_3.9_remind_SSP2-NPi_2025	CH	kilogram		technosphere	0	-43.5054	0	waste paint on metal
market for waste paint on metal	-5125.32	ecoinvent_cutoff_3.9_remind_SSP2-NPi_2025	RoW	kilogram		technosphere	0	-5125.32	0	waste paint on metal
market for waste paint on wall	-2411	ecoinvent_cutoff_3.9_remind_SSP2-NPi_2025	GLO	kilogram		technosphere	0	-2411	0	waste paint on wall
market for waste plastic, mixture	-28.3435	ecoinvent_cutoff_3.9_remind_SSP2-NPi_2025	PE	kilogram		technosphere	0	-28.3435	0	waste plastic, mixture
market for waste plastic, mixture	-70.1592	ecoinvent_cutoff_3.9_remind_SSP2-NPi_2025	IN	kilogram		technosphere	0	-70.1592	0	waste plastic, mixture
market for waste plastic, mixture	-2542.24	ecoinvent_cutoff_3.9_remind_SSP2-NPi_2025	BR	kilogram		technosphere	0	-2542.24	0	waste plastic, mixture
market for waste plastic, mixture	-17797.1	ecoinvent_cutoff_3.9_remind_SSP2-NPi_2025	RoW	kilogram		technosphere	0	-17797.1	0	waste plastic, mixture
market for waste plastic, mixture	-66.6228	ecoinvent_cutoff_3.9_remind_SSP2-NPi_2025	ZA	kilogram		technosphere	0	-66.6228	0	waste plastic, mixture
market for waste plastic, mixture	-169.862	ecoinvent_cutoff_3.9_remind_SSP2-NPi_2025	CO	kilogram		technosphere	0	-169.862	0	waste plastic, mixture
market for waste plastic, mixture	-12.8464	ecoinvent_cutoff_3.9_remind_SSP2-NPi_2025	CY	kilogram		technosphere	0	-12.8464	0	waste plastic, mixture
market for waste polyethylene	-282.191	ecoinvent_cutoff_3.9_remind_SSP2-NPi_2025	BR	kilogram		technosphere	0	-282.191	0	waste polyethylene
market for waste polyethylene	-18.8549	ecoinvent_cutoff_3.9_remind_SSP2-NPi_2025	CO	kilogram		technosphere	0	-18.8549	0	waste polyethylene
market for waste polyethylene	-7.39519	ecoinvent_cutoff_3.9_remind_SSP2-NPi_2025	ZA	kilogram		technosphere	0	-7.39519	0	waste polyethylene
market for waste polyethylene	-1975.49	ecoinvent_cutoff_3.9_remind_SSP2-NPi_2025	RoW	kilogram		technosphere	0	-1975.49	0	waste polyethylene
market for waste polyethylene	-1.42597	ecoinvent_cutoff_3.9_remind_SSP2-NPi_2025	CY	kilogram		technosphere	0	-1.42597	0	waste polyethylene
market for waste polyethylene	-3.14616	ecoinvent_cutoff_3.9_remind_SSP2-NPi_2025	PE	kilogram		technosphere	0	-3.14616	0	waste polyethylene
market for waste polyethylene	-7.78775	ecoinvent_cutoff_3.9_remind_SSP2-NPi_2025	IN	kilogram		technosphere	0	-7.78775	0	waste polyethylene
market for waste polyethylene/polypropylene product	-4738.8	ecoinvent_cutoff_3.9_remind_SSP2-NPi_2025	Europe without Switzerland	kilogram		technosphere	0	-4738.8	0	waste polyethylene/polypropylene product
market for waste polyethylene/polypropylene product	-142.199	ecoinvent_cutoff_3.9_remind_SSP2-NPi_2025	CH	kilogram		technosphere	0	-142.199	0	waste polyethylene/polypropylene product
market for waste polyethylene/polypropylene product	-12013.5	ecoinvent_cutoff_3.9_remind_SSP2-NPi_2025	RoW	kilogram		technosphere	0	-12013.5	0	waste polyethylene/polypropylene product
market for waste polyvinylchloride	-3552.42	ecoinvent_cutoff_3.9_remind_SSP2-NPi_2025	RoW	kilogram		technosphere	0	-3552.42	0	waste polyvinylchloride
market for waste polyvinylchloride	-33.9057	ecoinvent_cutoff_3.9_remind_SSP2-NPi_2025	CO	kilogram		technosphere	0	-33.9057	0	waste polyvinylchloride
market for waste polyvinylchloride	-2.56424	ecoinvent_cutoff_3.9_remind_SSP2-NPi_2025	CY	kilogram		technosphere	0	-2.56424	0	waste polyvinylchloride
market for waste polyvinylchloride	-13.2984	ecoinvent_cutoff_3.9_remind_SSP2-NPi_2025	ZA	kilogram		technosphere	0	-13.2984	0	waste polyvinylchloride
market for waste polyvinylchloride	-5.65757	ecoinvent_cutoff_3.9_remind_SSP2-NPi_2025	PE	kilogram		technosphere	0	-5.65757	0	waste polyvinylchloride
market for waste polyvinylchloride	-507.448	ecoinvent_cutoff_3.9_remind_SSP2-NPi_2025	BR	kilogram		technosphere	0	-507.448	0	waste polyvinylchloride
market for waste polyvinylchloride	-14.0043	ecoinvent_cutoff_3.9_remind_SSP2-NPi_2025	IN	kilogram		technosphere	0	-14.0043	0	waste polyvinylchloride
market for waste reinforced concrete	-5495.82	ecoinvent_cutoff_3.9_remind_SSP2-NPi_2025	CH	kilogram		technosphere	0	-5495.82	0	waste reinforced concrete
market for waste reinforced concrete	-7.40249e+06	ecoinvent_cutoff_3.9_remind_SSP2-NPi_2025	RoW	kilogram		technosphere	0	-7.40249e+06	0	waste reinforced concrete
market for waste reinforced concrete	-518682	ecoinvent_cutoff_3.9_remind_SSP2-NPi_2025	Europe without Switzerland	kilogram		technosphere	0	-518682	0	waste reinforced concrete
market for waste rubber, unspecified	-300.163	ecoinvent_cutoff_3.9_remind_SSP2-NPi_2025	RoW	kilogram		technosphere	0	-300.163	0	waste rubber, unspecified
market for waste rubber, unspecified	-300.163	ecoinvent_cutoff_3.9_remind_SSP2-NPi_2025	Europe without Switzerland	kilogram		technosphere	0	-300.163	0	waste rubber, unspecified
market for waste rubber, unspecified	-12.6008	ecoinvent_cutoff_3.9_remind_SSP2-NPi_2025	CH	kilogram		technosphere	0	-12.6008	0	waste rubber, unspecified
market for wire drawing, copper	44252.2	ecoinvent_cutoff_3.9_remind_SSP2-NPi_2025	GLO	kilogram		technosphere	0	44252.2	0	wire drawing, copper
market group for concrete, normal strength	3086.33	ecoinvent_cutoff_3.9_remind_SSP2-NPi_2025	GLO	cubic meter		technosphere	0		0	concrete, normal strength
market group for electricity, medium voltage	445224	ecoinvent_cutoff_3.9_remind_SSP2-NPi_2025	GLO	kilowatt hour		technosphere	0		0	electricity, medium voltage
market group for waste glass	-3484.6	ecoinvent_cutoff_3.9_remind_SSP2-NPi_2025	RER	kilogram		technosphere	0	-3484.6	0	waste glass
market group for waste plastic, mixture	-2203.31	ecoinvent_cutoff_3.9_remind_SSP2-NPi_2025	RER	kilogram		technosphere	0	-2203.31	0	waste plastic, mixture
market group for waste polyethylene	-244.57	ecoinvent_cutoff_3.9_remind_SSP2-NPi_2025	RER	kilogram		technosphere	0	-244.57	0	waste polyethylene
market group for waste polyvinylchloride	-439.797	ecoinvent_cutoff_3.9_remind_SSP2-NPi_2025	RER	kilogram		technosphere	0	-439.797	0	waste polyvinylchloride
reinforcing steel production, converter, 2025	519470	steel_prod_SSP2-NPi_2025	GLO	kilogram		technosphere				reinforcing steel
steel production, converter, low-alloyed, 2025	158008	steel_prod_SSP2-NPi_2025	World	kilogram		technosphere				steel, low-alloyed
steel production, from primary iron, chromium steel 18/8, optimistic, 2025	6403.49	steel_prod_SSP2-NPi_2025	World	kilogram		technosphere				steel, chromium steel 18/8
Activity	wind turbine construction, 4.5MW, onshore, secondary, optimistic
code	71d0e38c72bb96f42e15bdc646bcfc6c_copy1
comment	This dataset represents the construction of a wind turbine with a capacity of 4.5MW for onshore use. The term "wind turbine" inludes moving parts such as nacelle, rotor, rotor blades, transition piece as well as fixed parts such as the tower and the foundation. Reference technology for this wind turbine is an Enercon E-112 turbine. The tower is made of reinforced concrete, a relatively new techno…
location	GLO
reference product	wind turbine, 4.5MW, onshore
unit	unit
Exchanges
name	amount	database	location	unit	categories	type	uncertainty type	loc	production volume	reference product
Occupation, industrial area	6280	biosphere3		square meter-year	natural resource::land	biosphere	0	6280	0
Transformation, from pasture, man made	314	biosphere3		square meter	natural resource::land	biosphere	0		0
Transformation, to industrial area	314	biosphere3		square meter	natural resource::land	biosphere	0	314	0
wind turbine construction, 4.5MW, onshore, secondary, optimistic	1	Renewables_SSP2-NPi_2025	GLO	unit		production	0	1	633.904	wind turbine, 4.5MW, onshore
aluminium scrap, post-consumer, Recycled Content cut-off	-973.298	ecoinvent_cutoff_3.9_remind_SSP2-NPi_2025	GLO	kilogram		technosphere	0	-973.298	0	aluminium scrap, post-consumer
steel production, electric, chromium steel 18/8, optimistic, 2025	6403.49	steel_prod_SSP2-NPi_2025	World	kilogram		technosphere				steel, chromium steel 18/8
iron scrap, unsorted, Recycled Content cut-off	-100258	ecoinvent_cutoff_3.9_remind_SSP2-NPi_2025	GLO	kilogram		technosphere	0	-100258	0	iron scrap, unsorted
steel production, electric, low-alloyed, optimistic, 2025	158008	steel_prod_SSP2-NPi_2025	World	kilogram		technosphere				steel, low-alloyed
market for alkyd paint, white, without water, in 60% solution state	6260.93	ecoinvent_cutoff_3.9_remind_SSP2-NPi_2025	RoW	kilogram		technosphere	0		0	alkyd paint, white, without water, in 60% solution state
market for alkyd paint, white, without water, in 60% solution state	1318.89	ecoinvent_cutoff_3.9_remind_SSP2-NPi_2025	RER	kilogram		technosphere	0		0	alkyd paint, white, without water, in 60% solution state
market for aluminium, cast alloy	311.455	ecoinvent_cutoff_3.9_remind_SSP2-NPi_2025	GLO	kilogram		technosphere	0		0	aluminium, cast alloy
market for aluminium, wrought alloy	661.843	ecoinvent_cutoff_3.9_remind_SSP2-NPi_2025	GLO	kilogram		technosphere	0		0	aluminium, wrought alloy
market for cast iron	100258	ecoinvent_cutoff_3.9_remind_SSP2-NPi_2025	GLO	kilogram		technosphere	0		0	cast iron
market for copper, cathode	44252.2	ecoinvent_cutoff_3.9_remind_SSP2-NPi_2025	GLO	kilogram		technosphere	0		0	copper, cathode
market for electronics scrap from control units	-572.165	ecoinvent_cutoff_3.9_remind_SSP2-NPi_2025	GLO	kilogram		technosphere	0	-572.165	0	electronics scrap from control units
market for electronics, for control units	572.165	ecoinvent_cutoff_3.9_remind_SSP2-NPi_2025	GLO	kilogram		technosphere	0		0	electronics, for control units
market for epoxy resin, liquid	13954.9	ecoinvent_cutoff_3.9_remind_SSP2-NPi_2025	RoW	kilogram		technosphere	0	13954.9	0	epoxy resin, liquid
market for epoxy resin, liquid	2939.64	ecoinvent_cutoff_3.9_remind_SSP2-NPi_2025	RER	kilogram		technosphere	0	2939.64	0	epoxy resin, liquid
market for excavation, hydraulic digger	628	ecoinvent_cutoff_3.9_remind_SSP2-NPi_2025	GLO	cubic meter		technosphere	0		0	excavation, hydraulic digger
market for glass fibre reinforced plastic, polyamide, injection moulded	45780.9	ecoinvent_cutoff_3.9_remind_SSP2-NPi_2025	GLO	kilogram		technosphere	0		0	glass fibre reinforced plastic, polyamide, injection moulded
market for polyethylene, high density, granulate	2540.86	ecoinvent_cutoff_3.9_remind_SSP2-NPi_2025	GLO	kilogram		technosphere	0		0	polyethylene, high density, granulate
market for polyvinylchloride, emulsion polymerised	583.29	ecoinvent_cutoff_3.9_remind_SSP2-NPi_2025	GLO	kilogram		technosphere	0		0	polyvinylchloride, emulsion polymerised
market for polyvinylchloride, suspension polymerised	3985.8	ecoinvent_cutoff_3.9_remind_SSP2-NPi_2025	GLO	kilogram		technosphere	0		0	polyvinylchloride, suspension polymerised
market for road	8000	ecoinvent_cutoff_3.9_remind_SSP2-NPi_2025	GLO	meter-year		technosphere	0		0	road
market for scrap copper	-658.593	ecoinvent_cutoff_3.9_remind_SSP2-NPi_2025	CH	kilogram		technosphere	0	-658.593	0	scrap copper
market for scrap copper	-29556.5	ecoinvent_cutoff_3.9_remind_SSP2-NPi_2025	RoW	kilogram		technosphere	0	-29556.5	0	scrap copper
market for scrap copper	-14037.2	ecoinvent_cutoff_3.9_remind_SSP2-NPi_2025	Europe without Switzerland	kilogram		technosphere	0	-14037.2	0	scrap copper
market for scrap steel	-50.721	ecoinvent_cutoff_3.9_remind_SSP2-NPi_2025	CH	kilogram		technosphere	0	-50.721	0	scrap steel
market for scrap steel	-124328	ecoinvent_cutoff_3.9_remind_SSP2-NPi_2025	RoW	kilogram		technosphere	0	-124328	0	scrap steel
market for scrap steel	-40033.5	ecoinvent_cutoff_3.9_remind_SSP2-NPi_2025	Europe without Switzerland	kilogram		technosphere	0	-40033.5	0	scrap steel
market for sheet rolling, aluminium	973.298	ecoinvent_cutoff_3.9_remind_SSP2-NPi_2025	GLO	kilogram		technosphere	0	973.298	0	sheet rolling, aluminium
market for sheet rolling, chromium steel	6403.49	ecoinvent_cutoff_3.9_remind_SSP2-NPi_2025	GLO	kilogram		technosphere	0	6403.49	0	sheet rolling, chromium steel
market for sheet rolling, steel	158008	ecoinvent_cutoff_3.9_remind_SSP2-NPi_2025	GLO	kilogram		technosphere	0	158008	0	sheet rolling, steel
market for synthetic rubber	612.927	ecoinvent_cutoff_3.9_remind_SSP2-NPi_2025	GLO	kilogram		technosphere	0		0	synthetic rubber
market for waste glass	-70.586	ecoinvent_cutoff_3.9_remind_SSP2-NPi_2025	ZA	kilogram		technosphere	0	-70.586	0	waste glass
market for waste glass	-23.9548	ecoinvent_cutoff_3.9_remind_SSP2-NPi_2025	PE	kilogram		technosphere	0	-23.9548	0	waste glass
market for waste glass	-1834.45	ecoinvent_cutoff_3.9_remind_SSP2-NPi_2025	BR	kilogram		technosphere	0	-1834.45	0	waste glass
market for waste glass	-15.7747	ecoinvent_cutoff_3.9_remind_SSP2-NPi_2025	IN	kilogram		technosphere	0	-15.7747	0	waste glass
market for waste glass	-169.078	ecoinvent_cutoff_3.9_remind_SSP2-NPi_2025	CO	kilogram		technosphere	0	-169.078	0	waste glass
market for waste glass	-17288.2	ecoinvent_cutoff_3.9_remind_SSP2-NPi_2025	RoW	kilogram		technosphere	0	-17288.2	0	waste glass
market for waste glass	-3.8358	ecoinvent_cutoff_3.9_remind_SSP2-NPi_2025	CY	kilogram		technosphere	0	-3.8358	0	waste glass
market for waste paint on metal	-43.5054	ecoinvent_cutoff_3.9_remind_SSP2-NPi_2025	CH	kilogram		technosphere	0	-43.5054	0	waste paint on metal
market for waste paint on metal	-5125.32	ecoinvent_cutoff_3.9_remind_SSP2-NPi_2025	RoW	kilogram		technosphere	0	-5125.32	0	waste paint on metal
market for waste paint on wall	-2411	ecoinvent_cutoff_3.9_remind_SSP2-NPi_2025	GLO	kilogram		technosphere	0	-2411	0	waste paint on wall
market for waste plastic, mixture	-28.3435	ecoinvent_cutoff_3.9_remind_SSP2-NPi_2025	PE	kilogram		technosphere	0	-28.3435	0	waste plastic, mixture
market for waste plastic, mixture	-70.1592	ecoinvent_cutoff_3.9_remind_SSP2-NPi_2025	IN	kilogram		technosphere	0	-70.1592	0	waste plastic, mixture
market for waste plastic, mixture	-2542.24	ecoinvent_cutoff_3.9_remind_SSP2-NPi_2025	BR	kilogram		technosphere	0	-2542.24	0	waste plastic, mixture
market for waste plastic, mixture	-17797.1	ecoinvent_cutoff_3.9_remind_SSP2-NPi_2025	RoW	kilogram		technosphere	0	-17797.1	0	waste plastic, mixture
market for waste plastic, mixture	-66.6228	ecoinvent_cutoff_3.9_remind_SSP2-NPi_2025	ZA	kilogram		technosphere	0	-66.6228	0	waste plastic, mixture
market for waste plastic, mixture	-169.862	ecoinvent_cutoff_3.9_remind_SSP2-NPi_2025	CO	kilogram		technosphere	0	-169.862	0	waste plastic, mixture
market for waste plastic, mixture	-12.8464	ecoinvent_cutoff_3.9_remind_SSP2-NPi_2025	CY	kilogram		technosphere	0	-12.8464	0	waste plastic, mixture
market for waste polyethylene	-282.191	ecoinvent_cutoff_3.9_remind_SSP2-NPi_2025	BR	kilogram		technosphere	0	-282.191	0	waste polyethylene
market for waste polyethylene	-18.8549	ecoinvent_cutoff_3.9_remind_SSP2-NPi_2025	CO	kilogram		technosphere	0	-18.8549	0	waste polyethylene
market for waste polyethylene	-7.39519	ecoinvent_cutoff_3.9_remind_SSP2-NPi_2025	ZA	kilogram		technosphere	0	-7.39519	0	waste polyethylene
market for waste polyethylene	-1975.49	ecoinvent_cutoff_3.9_remind_SSP2-NPi_2025	RoW	kilogram		technosphere	0	-1975.49	0	waste polyethylene
market for waste polyethylene	-1.42597	ecoinvent_cutoff_3.9_remind_SSP2-NPi_2025	CY	kilogram		technosphere	0	-1.42597	0	waste polyethylene
market for waste polyethylene	-3.14616	ecoinvent_cutoff_3.9_remind_SSP2-NPi_2025	PE	kilogram		technosphere	0	-3.14616	0	waste polyethylene
market for waste polyethylene	-7.78775	ecoinvent_cutoff_3.9_remind_SSP2-NPi_2025	IN	kilogram		technosphere	0	-7.78775	0	waste polyethylene
market for waste polyethylene/polypropylene product	-4738.8	ecoinvent_cutoff_3.9_remind_SSP2-NPi_2025	Europe without Switzerland	kilogram		technosphere	0	-4738.8	0	waste polyethylene/polypropylene product
market for waste polyethylene/polypropylene product	-142.199	ecoinvent_cutoff_3.9_remind_SSP2-NPi_2025	CH	kilogram		technosphere	0	-142.199	0	waste polyethylene/polypropylene product
market for waste polyethylene/polypropylene product	-12013.5	ecoinvent_cutoff_3.9_remind_SSP2-NPi_2025	RoW	kilogram		technosphere	0	-12013.5	0	waste polyethylene/polypropylene product
market for waste polyvinylchloride	-3552.42	ecoinvent_cutoff_3.9_remind_SSP2-NPi_2025	RoW	kilogram		technosphere	0	-3552.42	0	waste polyvinylchloride
market for waste polyvinylchloride	-33.9057	ecoinvent_cutoff_3.9_remind_SSP2-NPi_2025	CO	kilogram		technosphere	0	-33.9057	0	waste polyvinylchloride
market for waste polyvinylchloride	-2.56424	ecoinvent_cutoff_3.9_remind_SSP2-NPi_2025	CY	kilogram		technosphere	0	-2.56424	0	waste polyvinylchloride
market for waste polyvinylchloride	-13.2984	ecoinvent_cutoff_3.9_remind_SSP2-NPi_2025	ZA	kilogram		technosphere	0	-13.2984	0	waste polyvinylchloride
market for waste polyvinylchloride	-5.65757	ecoinvent_cutoff_3.9_remind_SSP2-NPi_2025	PE	kilogram		technosphere	0	-5.65757	0	waste polyvinylchloride
market for waste polyvinylchloride	-507.448	ecoinvent_cutoff_3.9_remind_SSP2-NPi_2025	BR	kilogram		technosphere	0	-507.448	0	waste polyvinylchloride
market for waste polyvinylchloride	-14.0043	ecoinvent_cutoff_3.9_remind_SSP2-NPi_2025	IN	kilogram		technosphere	0	-14.0043	0	waste polyvinylchloride
market for waste reinforced concrete	-5495.82	ecoinvent_cutoff_3.9_remind_SSP2-NPi_2025	CH	kilogram		technosphere	0	-5495.82	0	waste reinforced concrete
market for waste reinforced concrete	-7.40249e+06	ecoinvent_cutoff_3.9_remind_SSP2-NPi_2025	RoW	kilogram		technosphere	0	-7.40249e+06	0	waste reinforced concrete
market for waste reinforced concrete	-518682	ecoinvent_cutoff_3.9_remind_SSP2-NPi_2025	Europe without Switzerland	kilogram		technosphere	0	-518682	0	waste reinforced concrete
market for waste rubber, unspecified	-300.163	ecoinvent_cutoff_3.9_remind_SSP2-NPi_2025	RoW	kilogram		technosphere	0	-300.163	0	waste rubber, unspecified
market for waste rubber, unspecified	-300.163	ecoinvent_cutoff_3.9_remind_SSP2-NPi_2025	Europe without Switzerland	kilogram		technosphere	0	-300.163	0	waste rubber, unspecified
market for waste rubber, unspecified	-12.6008	ecoinvent_cutoff_3.9_remind_SSP2-NPi_2025	CH	kilogram		technosphere	0	-12.6008	0	waste rubber, unspecified
market for wire drawing, copper	44252.2	ecoinvent_cutoff_3.9_remind_SSP2-NPi_2025	GLO	kilogram		technosphere	0	44252.2	0	wire drawing, copper
market group for concrete, normal strength	3086.33	ecoinvent_cutoff_3.9_remind_SSP2-NPi_2025	GLO	cubic meter		technosphere	0		0	concrete, normal strength
market group for electricity, medium voltage	445224	ecoinvent_cutoff_3.9_remind_SSP2-NPi_2025	GLO	kilowatt hour		technosphere	0		0	electricity, medium voltage
market group for waste glass	-3484.6	ecoinvent_cutoff_3.9_remind_SSP2-NPi_2025	RER	kilogram		technosphere	0	-3484.6	0	waste glass
market group for waste plastic, mixture	-2203.31	ecoinvent_cutoff_3.9_remind_SSP2-NPi_2025	RER	kilogram		technosphere	0	-2203.31	0	waste plastic, mixture
market group for waste polyethylene	-244.57	ecoinvent_cutoff_3.9_remind_SSP2-NPi_2025	RER	kilogram		technosphere	0	-244.57	0	waste polyethylene
market group for waste polyvinylchloride	-439.797	ecoinvent_cutoff_3.9_remind_SSP2-NPi_2025	RER	kilogram		technosphere	0	-439.797	0	waste polyvinylchloride
steel production, electric, reinforcing steel, optimistic, 2025	519470	steel_prod_SSP2-NPi_2025	World	kilogram		technosphere				reinforcing steel
Activity	Czochralski (Cz) silicon production
code	2a46d983a9384c0d9db8393eaead6c54
comment	Adapted from Müller et al. (2021): A comparative life cycle assessment of silicon PV modules: Impact of module design, manufacturing location and inventory.
location	RER
reference product	silicon, single crystal, Czochralski
type	process
unit	kilogram
worksheet name	Renewables_SSP2-NPi_2025
Exchanges
name	amount	database	location	unit	categories	type	reference product
BOD5, Biological Oxygen Demand	0.13	biosphere3		kilogram	water::surface water	biosphere
COD, Chemical Oxygen Demand	0.13	biosphere3		kilogram	water::surface water	biosphere
DOC, Dissolved Organic Carbon	0.0405	biosphere3		kilogram	water::surface water	biosphere
Fluoride	0.00237	biosphere3		kilogram	water::surface water	biosphere
Hydrocarbons, unspecified	0.0228	biosphere3		kilogram	water::surface water	biosphere
Hydroxide	0.00742	biosphere3		kilogram	water::surface water	biosphere
Nitrogen	0.0091	biosphere3		kilogram	water::surface water	biosphere
TOC, Total Organic Carbon	0.0405	biosphere3		kilogram	water::surface water	biosphere
Water	0.3	biosphere3		cubic meter	air	biosphere
Water	2.2	biosphere3		cubic meter	water	biosphere
Water, cooling, unspecified natural origin	2.33	biosphere3		cubic meter	natural resource::in water	biosphere
Czochralski (Cz) silicon production	1	Renewables_SSP2-NPi_2025	RER	kilogram		production	silicon, single crystal, Czochralski
chlor-alkali electrolysis, membrane cell	0.00478	ecoinvent_3.9.1_cutoff_PV_update	RER	kilogram		technosphere	sodium hydroxide, without water, in 50% solution state
market for argon, liquid	0.046	ecoinvent_3.9.1_cutoff_PV_update	RER	kilogram		technosphere	argon, liquid
market for ceramic tile	0.062	ecoinvent_3.9.1_cutoff_PV_update	GLO	kilogram		technosphere	ceramic tile
market for hydrochloric acid, without water, in 30% solution state	0.000438	ecoinvent_3.9.1_cutoff_PV_update	RER	kilogram		technosphere	hydrochloric acid, without water, in 30% solution state
market for hydrogen fluoride	0.00351	ecoinvent_3.9.1_cutoff_PV_update	RER	kilogram		technosphere	hydrogen fluoride
market for lime, hydrated, packed	0.022	ecoinvent_3.9.1_cutoff_PV_update	RER	kilogram		technosphere	lime, hydrated, packed
market for nitric acid, without water, in 50% solution state	0.00778	ecoinvent_3.9.1_cutoff_PV_update	RER w/o RU	kilogram		technosphere	nitric acid, without water, in 50% solution state
market for waste, from silicon wafer production, inorganic	0.1	ecoinvent_3.9.1_cutoff_PV_update	GLO	kilogram		technosphere	waste, from silicon wafer production, inorganic
market for water, completely softened	0.0684	ecoinvent_3.9.1_cutoff_PV_update	RER	kilogram		technosphere	water, completely softened
market group for electricity, medium voltage	38.4	ecoinvent_3.9.1_cutoff_PV_update	RER	kilowatt hour		technosphere	electricity, medium voltage
poly-silicon production	0.639	Renewables_SSP2-NPi_2025	RER	kilogram		technosphere	silicon, poly-silicon
silicone factory construction	5e-12	ecoinvent_3.9.1_cutoff_PV_update	RER	unit		technosphere	silicone factory
Activity	Czochralski (Cz) silicon production
code	44488af7f6114e9080564655d7f051e9
comment	Adapted from Müller et al. (2021): A comparative life cycle assessment of silicon PV modules: Impact of module design, manufacturing location and inventory.
location	CN
reference product	silicon, single crystal, Czochralski
type	process
unit	kilogram
worksheet name	Renewables_SSP2-NPi_2025
Exchanges
name	amount	database	location	unit	categories	type	reference product
BOD5, Biological Oxygen Demand	0.13	biosphere3		kilogram	water::surface water	biosphere
COD, Chemical Oxygen Demand	0.13	biosphere3		kilogram	water::surface water	biosphere
DOC, Dissolved Organic Carbon	0.0405	biosphere3		kilogram	water::surface water	biosphere
Fluoride	0.00237	biosphere3		kilogram	water::surface water	biosphere
Hydrocarbons, unspecified	0.0228	biosphere3		kilogram	water::surface water	biosphere
Hydroxide	0.00742	biosphere3		kilogram	water::surface water	biosphere
Nitrogen	0.0091	biosphere3		kilogram	water::surface water	biosphere
TOC, Total Organic Carbon	0.0405	biosphere3		kilogram	water::surface water	biosphere
Water	0.3	biosphere3		cubic meter	air	biosphere
Water	2.2	biosphere3		cubic meter	water	biosphere
Water, cooling, unspecified natural origin	2.33	biosphere3		cubic meter	natural resource::in water	biosphere
Czochralski (Cz) silicon production	1	Renewables_SSP2-NPi_2025	CN	kilogram		production	silicon, single crystal, Czochralski
market for argon, liquid	0.046	ecoinvent_3.9.1_cutoff_PV_update	RoW	kilogram		technosphere	argon, liquid
market for ceramic tile	0.062	ecoinvent_3.9.1_cutoff_PV_update	GLO	kilogram		technosphere	ceramic tile
market for hydrochloric acid, without water, in 30% solution state	0.000438	ecoinvent_3.9.1_cutoff_PV_update	RoW	kilogram		technosphere	hydrochloric acid, without water, in 30% solution state
market for hydrogen fluoride	0.00351	ecoinvent_3.9.1_cutoff_PV_update	RoW	kilogram		technosphere	hydrogen fluoride
market for lime, hydrated, packed	0.022	ecoinvent_3.9.1_cutoff_PV_update	RoW	kilogram		technosphere	lime, hydrated, packed
market for nitric acid, without water, in 50% solution state	0.00778	ecoinvent_3.9.1_cutoff_PV_update	CN	kilogram		technosphere	nitric acid, without water, in 50% solution state
market for silicone factory	5e-12	ecoinvent_3.9.1_cutoff_PV_update	GLO	unit		technosphere	silicone factory
market for sodium hydroxide, without water, in 50% solution state	0.00478	ecoinvent_3.9.1_cutoff_PV_update	GLO	kilogram		technosphere	sodium hydroxide, without water, in 50% solution state
market for waste, from silicon wafer production, inorganic	0.1	ecoinvent_3.9.1_cutoff_PV_update	GLO	kilogram		technosphere	waste, from silicon wafer production, inorganic
market for water, completely softened	0.0684	ecoinvent_3.9.1_cutoff_PV_update	RoW	kilogram		technosphere	water, completely softened
market group for electricity, medium voltage	38.4	ecoinvent_3.9.1_cutoff_PV_update	CN	kilowatt hour		technosphere	electricity, medium voltage
poly-silicon production	0.639	Renewables_SSP2-NPi_2025	CN	kilogram		technosphere	silicon, poly-silicon
Activity	Czochralski (Cz) silicon production
code	a44701b3194d47ee86b1fdeff5e5190f
comment	Adapted from Müller et al. (2021): A comparative life cycle assessment of silicon PV modules: Impact of module design, manufacturing location and inventory.
location	RoW
reference product	silicon, single crystal, Czochralski
type	process
unit	kilogram
worksheet name	Renewables_SSP2-NPi_2025
Exchanges
name	amount	database	location	unit	categories	type	reference product
BOD5, Biological Oxygen Demand	0.13	biosphere3		kilogram	water::surface water	biosphere
COD, Chemical Oxygen Demand	0.13	biosphere3		kilogram	water::surface water	biosphere
DOC, Dissolved Organic Carbon	0.0405	biosphere3		kilogram	water::surface water	biosphere
Fluoride	0.00237	biosphere3		kilogram	water::surface water	biosphere
Hydrocarbons, unspecified	0.0228	biosphere3		kilogram	water::surface water	biosphere
Hydroxide	0.00742	biosphere3		kilogram	water::surface water	biosphere
Nitrogen	0.0091	biosphere3		kilogram	water::surface water	biosphere
TOC, Total Organic Carbon	0.0405	biosphere3		kilogram	water::surface water	biosphere
Water	0.3	biosphere3		cubic meter	air	biosphere
Water	2.2	biosphere3		cubic meter	water	biosphere
Water, cooling, unspecified natural origin	2.33	biosphere3		cubic meter	natural resource::in water	biosphere
Czochralski (Cz) silicon production	1	Renewables_SSP2-NPi_2025	RoW	kilogram		production	silicon, single crystal, Czochralski
market for argon, liquid	0.046	ecoinvent_3.9.1_cutoff_PV_update	RoW	kilogram		technosphere	argon, liquid
market for ceramic tile	0.062	ecoinvent_3.9.1_cutoff_PV_update	GLO	kilogram		technosphere	ceramic tile
market for hydrochloric acid, without water, in 30% solution state	0.000438	ecoinvent_3.9.1_cutoff_PV_update	RoW	kilogram		technosphere	hydrochloric acid, without water, in 30% solution state
market for hydrogen fluoride	0.00351	ecoinvent_3.9.1_cutoff_PV_update	RoW	kilogram		technosphere	hydrogen fluoride
market for lime, hydrated, packed	0.022	ecoinvent_3.9.1_cutoff_PV_update	RoW	kilogram		technosphere	lime, hydrated, packed
market for nitric acid, without water, in 50% solution state	0.00778	ecoinvent_3.9.1_cutoff_PV_update	RoW	kilogram		technosphere	nitric acid, without water, in 50% solution state
market for silicone factory	5e-12	ecoinvent_3.9.1_cutoff_PV_update	GLO	unit		technosphere	silicone factory
market for sodium hydroxide, without water, in 50% solution state	0.00478	ecoinvent_3.9.1_cutoff_PV_update	GLO	kilogram		technosphere	sodium hydroxide, without water, in 50% solution state
market for waste, from silicon wafer production, inorganic	0.1	ecoinvent_3.9.1_cutoff_PV_update	GLO	kilogram		technosphere	waste, from silicon wafer production, inorganic
market for water, completely softened	0.0684	ecoinvent_3.9.1_cutoff_PV_update	RoW	kilogram		technosphere	water, completely softened
market group for electricity, medium voltage	38.4	Renewables_SSP2-NPi_2025	PV producing countries except China/Europe	kilowatt hour		technosphere	electricity, medium voltage
poly-silicon production	0.639	Renewables_SSP2-NPi_2025	RoW	kilogram		technosphere	silicon, poly-silicon
Activity	Czochralski (Cz) silicon production
code	c0438037705c44ff948a318dbe422958
comment	Adapted from Müller et al. (2021): A comparative life cycle assessment of silicon PV modules: Impact of module design, manufacturing location and inventory.
location	GLO
reference product	silicon, single crystal, Czochralski
type	process
unit	kilogram
worksheet name	Renewables_SSP2-NPi_2025
Exchanges
name	amount	database	location	unit	categories	type	reference product
BOD5, Biological Oxygen Demand	0.13	biosphere3		kilogram	water::surface water	biosphere
COD, Chemical Oxygen Demand	0.13	biosphere3		kilogram	water::surface water	biosphere
DOC, Dissolved Organic Carbon	0.0405	biosphere3		kilogram	water::surface water	biosphere
Fluoride	0.00237	biosphere3		kilogram	water::surface water	biosphere
Hydrocarbons, unspecified	0.0228	biosphere3		kilogram	water::surface water	biosphere
Hydroxide	0.00742	biosphere3		kilogram	water::surface water	biosphere
Nitrogen	0.0091	biosphere3		kilogram	water::surface water	biosphere
TOC, Total Organic Carbon	0.0405	biosphere3		kilogram	water::surface water	biosphere
Water	0.3	biosphere3		cubic meter	air	biosphere
Water	2.2	biosphere3		cubic meter	water	biosphere
Water, cooling, unspecified natural origin	2.33	biosphere3		cubic meter	natural resource::in water	biosphere
Czochralski (Cz) silicon production	1	Renewables_SSP2-NPi_2025	GLO	kilogram		production	silicon, single crystal, Czochralski
market for argon, liquid	0.046	ecoinvent_3.9.1_cutoff_PV_update	RoW	kilogram		technosphere	argon, liquid
market for ceramic tile	0.062	ecoinvent_3.9.1_cutoff_PV_update	GLO	kilogram		technosphere	ceramic tile
market for hydrochloric acid, without water, in 30% solution state	0.000438	ecoinvent_3.9.1_cutoff_PV_update	RoW	kilogram		technosphere	hydrochloric acid, without water, in 30% solution state
market for hydrogen fluoride	0.00351	ecoinvent_3.9.1_cutoff_PV_update	RoW	kilogram		technosphere	hydrogen fluoride
market for lime, hydrated, packed	0.022	ecoinvent_3.9.1_cutoff_PV_update	RoW	kilogram		technosphere	lime, hydrated, packed
market for nitric acid, without water, in 50% solution state	0.00778	ecoinvent_3.9.1_cutoff_PV_update	RoW	kilogram		technosphere	nitric acid, without water, in 50% solution state
market for silicone factory	5e-12	ecoinvent_3.9.1_cutoff_PV_update	GLO	unit		technosphere	silicone factory
market for sodium hydroxide, without water, in 50% solution state	0.00478	ecoinvent_3.9.1_cutoff_PV_update	GLO	kilogram		technosphere	sodium hydroxide, without water, in 50% solution state
market for waste, from silicon wafer production, inorganic	0.1	ecoinvent_3.9.1_cutoff_PV_update	GLO	kilogram		technosphere	waste, from silicon wafer production, inorganic
market for water, completely softened	0.0684	ecoinvent_3.9.1_cutoff_PV_update	RoW	kilogram		technosphere	water, completely softened
market group for electricity, medium voltage	38.4	ecoinvent_3.9.1_cutoff_PV_update	GLO	kilowatt hour		technosphere	electricity, medium voltage
poly-silicon production	0.639	Renewables_SSP2-NPi_2025	CN	kilogram		technosphere	silicon, poly-silicon
Activity	PERC cell production
code	00aa4d88e2b142f2b3ec2ea1ff57ab99
comment	Adapted from Müller et al. (2021): A comparative life cycle assessment of silicon PV modules: Impact of module design, manufacturing location and inventory.
location	RER
reference product	photovoltaic cell, single-Si wafer
type	process
unit	square meter
worksheet name	Renewables_SSP2-NPi_2025
Exchanges
name	amount	database	location	unit	categories	type	reference product
Aluminium III	0.000772	biosphere3		kilogram	air::urban air close to ground	biosphere
Ethane, hexafluoro-, HFC-116	0.000119	biosphere3		kilogram	air::urban air close to ground	biosphere
Hydrochloric acid	0.000266	biosphere3		kilogram	air::urban air close to ground	biosphere
Hydrogen fluoride	4.85e-06	biosphere3		kilogram	air::urban air close to ground	biosphere
Lead II	3.48e-07	biosphere3		kilogram	air::urban air close to ground	biosphere
Methane, tetrafluoro-, R-14	0.000248	biosphere3		kilogram	air::urban air close to ground	biosphere
NMVOC, non-methane volatile organic compounds	0.194	biosphere3		kilogram	air::urban air close to ground	biosphere
Nitrogen oxides	5e-05	biosphere3		kilogram	air::urban air close to ground	biosphere
Particulate Matter, < 2.5 um	0.00266	biosphere3		kilogram	air::urban air close to ground	biosphere
Silicon	7.27e-05	biosphere3		kilogram	air::urban air close to ground	biosphere
Water	0.0168	biosphere3		cubic meter	air	biosphere
Water	0.277	biosphere3		cubic meter	water	biosphere
Water, cooling, unspecified natural origin	0.231	biosphere3		cubic meter	natural resource::in water	biosphere
PERC cell production	1	Renewables_SSP2-NPi_2025	RER	square meter		production	photovoltaic cell, single-Si wafer
TMAl purification	0.000288	Renewables_SSP2-NPi_2025	GLO	kilogram		technosphere	trimethylaluminium, solar grade
market for ammonia, anhydrous, liquid	0.0165	ecoinvent_3.9.1_cutoff_PV_update	RER	kilogram		technosphere	ammonia, anhydrous, liquid
market for calcium chloride	0.207	ecoinvent_3.9.1_cutoff_PV_update	RER	kilogram		technosphere	calcium chloride
market for hydrochloric acid, without water, in 30% solution state	0.0681	ecoinvent_3.9.1_cutoff_PV_update	RER	kilogram		technosphere	hydrochloric acid, without water, in 30% solution state
market for hydrogen fluoride	0.0747	ecoinvent_3.9.1_cutoff_PV_update	RER	kilogram		technosphere	hydrogen fluoride
market for hydrogen peroxide, without water, in 50% solution state	0.094	ecoinvent_3.9.1_cutoff_PV_update	RER	kilogram		technosphere	hydrogen peroxide, without water, in 50% solution state
market for metallization paste, back side, aluminium	0.00901	ecoinvent_3.9.1_cutoff_PV_update	RER	kilogram		technosphere	metallization paste, back side, aluminium
market for metallization paste, front side	0.00348	ecoinvent_3.9.1_cutoff_PV_update	RER	kilogram		technosphere	metallization paste, front side
market for nitric acid, without water, in 50% solution state	0.0822	ecoinvent_3.9.1_cutoff_PV_update	RER w/o RU	kilogram		technosphere	nitric acid, without water, in 50% solution state
market for nitrogen, liquid	2.62	ecoinvent_3.9.1_cutoff_PV_update	RER	kilogram		technosphere	nitrogen, liquid
market for oxygen, liquid	0.334	ecoinvent_3.9.1_cutoff_PV_update	RER	kilogram		technosphere	oxygen, liquid
market for phosphorus oxychloride	0.000182	ecoinvent_3.9.1_cutoff_PV_update	RER	kilogram		technosphere	phosphorus oxychloride
market for photovoltaic cell factory	4e-07	ecoinvent_3.9.1_cutoff_PV_update	GLO	unit		technosphere	photovoltaic cell factory
market for propane	0.0414	ecoinvent_3.9.1_cutoff_PV_update	GLO	kilogram		technosphere	propane
market for silicon tetrahydride	0.00283	ecoinvent_3.9.1_cutoff_PV_update	GLO	kilogram		technosphere	silicon tetrahydride
market for solvent, organic	0.0123	ecoinvent_3.9.1_cutoff_PV_update	GLO	kilogram		technosphere	solvent, organic
market for sulfuric acid	0.0206	ecoinvent_3.9.1_cutoff_PV_update	RER	kilogram		technosphere	sulfuric acid
market for waste, from silicon wafer production, inorganic	0.00641	ecoinvent_3.9.1_cutoff_PV_update	GLO	kilogram		technosphere	waste, from silicon wafer production, inorganic
market for wastewater from PV cell production	0.0132	ecoinvent_3.9.1_cutoff_PV_update	RoW	cubic meter		technosphere	wastewater from PV cell production
market for water, completely softened	23.2	ecoinvent_3.9.1_cutoff_PV_update	RER	kilogram		technosphere	water, completely softened
market for water, deionised	39.4	ecoinvent_3.9.1_cutoff_PV_update	Europe without Switzerland	kilogram		technosphere	water, deionised
market group for electricity, medium voltage	6.03	ecoinvent_3.9.1_cutoff_PV_update	RER	kilowatt hour		technosphere	electricity, medium voltage
market group for heat, district or industrial, natural gas	3.55	ecoinvent_3.9.1_cutoff_PV_update	RER	megajoule		technosphere	heat, district or industrial, natural gas
metallization paste production, back side	0.00102	Renewables_SSP2-NPi_2025	RER	kilogram		technosphere	metallization paste, back side
nitrous oxide production	0.00766	ecoinvent_3.9.1_cutoff_PV_update	RER	kilogram		technosphere	nitrous oxide
potassium hydroxide production	0.151	ecoinvent_3.9.1_cutoff_PV_update	RER	kilogram		technosphere	potassium hydroxide
single-crystalline Si wafering & bricking	1.02	Renewables_SSP2-NPi_2025	RER	square meter		technosphere	single-Si wafer, photovoltaic
Activity	PERC cell production
code	3583081d0c9e473cbf2822374dbb7962
comment	Adapted from Müller et al. (2021): A comparative life cycle assessment of silicon PV modules: Impact of module design, manufacturing location and inventory.
location	RoW
reference product	photovoltaic cell, single-Si wafer
type	process
unit	square meter
worksheet name	Renewables_SSP2-NPi_2025
Exchanges
name	amount	database	location	unit	categories	type	reference product
Aluminium III	0.000772	biosphere3		kilogram	air::urban air close to ground	biosphere
Ethane, hexafluoro-, HFC-116	0.000119	biosphere3		kilogram	air::urban air close to ground	biosphere
Hydrochloric acid	0.000266	biosphere3		kilogram	air::urban air close to ground	biosphere
Hydrogen fluoride	4.85e-06	biosphere3		kilogram	air::urban air close to ground	biosphere
Lead II	3.48e-07	biosphere3		kilogram	air::urban air close to ground	biosphere
Methane, tetrafluoro-, R-14	0.000248	biosphere3		kilogram	air::urban air close to ground	biosphere
NMVOC, non-methane volatile organic compounds	0.194	biosphere3		kilogram	air::urban air close to ground	biosphere
Nitrogen oxides	5e-05	biosphere3		kilogram	air::urban air close to ground	biosphere
Particulate Matter, < 2.5 um	0.00266	biosphere3		kilogram	air::urban air close to ground	biosphere
Silicon	7.27e-05	biosphere3		kilogram	air::urban air close to ground	biosphere
Water	0.0168	biosphere3		cubic meter	air	biosphere
Water	0.277	biosphere3		cubic meter	water	biosphere
Water, cooling, unspecified natural origin	0.231	biosphere3		cubic meter	natural resource::in water	biosphere
PERC cell production	1	Renewables_SSP2-NPi_2025	RoW	square meter		production	photovoltaic cell, single-Si wafer
TMAl purification	0.000288	Renewables_SSP2-NPi_2025	GLO	kilogram		technosphere	trimethylaluminium, solar grade
market for ammonia, anhydrous, liquid	0.0165	ecoinvent_3.9.1_cutoff_PV_update	RoW	kilogram		technosphere	ammonia, anhydrous, liquid
market for calcium chloride	0.207	ecoinvent_3.9.1_cutoff_PV_update	RoW	kilogram		technosphere	calcium chloride
market for heat, district or industrial, natural gas	3.55	ecoinvent_3.9.1_cutoff_PV_update	RoW	megajoule		technosphere	heat, district or industrial, natural gas
market for hydrochloric acid, without water, in 30% solution state	0.0681	ecoinvent_3.9.1_cutoff_PV_update	RoW	kilogram		technosphere	hydrochloric acid, without water, in 30% solution state
market for hydrogen fluoride	0.0747	ecoinvent_3.9.1_cutoff_PV_update	RoW	kilogram		technosphere	hydrogen fluoride
market for hydrogen peroxide, without water, in 50% solution state	0.094	ecoinvent_3.9.1_cutoff_PV_update	RoW	kilogram		technosphere	hydrogen peroxide, without water, in 50% solution state
market for metallization paste, back side, aluminium	0.00901	ecoinvent_3.9.1_cutoff_PV_update	RoW	kilogram		technosphere	metallization paste, back side, aluminium
market for metallization paste, front side	0.00348	ecoinvent_3.9.1_cutoff_PV_update	RoW	kilogram		technosphere	metallization paste, front side
market for nitric acid, without water, in 50% solution state	0.0822	ecoinvent_3.9.1_cutoff_PV_update	RoW	kilogram		technosphere	nitric acid, without water, in 50% solution state
market for nitrogen, liquid	2.62	ecoinvent_3.9.1_cutoff_PV_update	RoW	kilogram		technosphere	nitrogen, liquid
market for nitrous oxide	0.00766	ecoinvent_3.9.1_cutoff_PV_update	GLO	kilogram		technosphere	nitrous oxide
market for oxygen, liquid	0.334	ecoinvent_3.9.1_cutoff_PV_update	RoW	kilogram		technosphere	oxygen, liquid
market for phosphorus oxychloride	0.000182	ecoinvent_3.9.1_cutoff_PV_update	RoW	kilogram		technosphere	phosphorus oxychloride
market for photovoltaic cell factory	4e-07	ecoinvent_3.9.1_cutoff_PV_update	GLO	unit		technosphere	photovoltaic cell factory
market for potassium hydroxide	0.151	ecoinvent_3.9.1_cutoff_PV_update	GLO	kilogram		technosphere	potassium hydroxide
market for propane	0.0414	ecoinvent_3.9.1_cutoff_PV_update	GLO	kilogram		technosphere	propane
market for silicon tetrahydride	0.00283	ecoinvent_3.9.1_cutoff_PV_update	GLO	kilogram		technosphere	silicon tetrahydride
market for solvent, organic	0.0123	ecoinvent_3.9.1_cutoff_PV_update	GLO	kilogram		technosphere	solvent, organic
market for sulfuric acid	0.0206	ecoinvent_3.9.1_cutoff_PV_update	RoW	kilogram		technosphere	sulfuric acid
market for waste, from silicon wafer production, inorganic	0.00641	ecoinvent_3.9.1_cutoff_PV_update	GLO	kilogram		technosphere	waste, from silicon wafer production, inorganic
market for wastewater from PV cell production	0.0132	ecoinvent_3.9.1_cutoff_PV_update	RoW	cubic meter		technosphere	wastewater from PV cell production
market for water, completely softened	23.2	ecoinvent_3.9.1_cutoff_PV_update	RoW	kilogram		technosphere	water, completely softened
market for water, deionised	39.4	ecoinvent_3.9.1_cutoff_PV_update	RoW	kilogram		technosphere	water, deionised
market group for electricity, medium voltage	6.03	Renewables_SSP2-NPi_2025	PV producing countries except China/Europe	kilowatt hour		technosphere	electricity, medium voltage
metallization paste production, back side	0.00102	Renewables_SSP2-NPi_2025	RoW	kilogram		technosphere	metallization paste, back side
single-crystalline Si wafering & bricking	1.02	Renewables_SSP2-NPi_2025	RoW	square meter		technosphere	single-Si wafer, photovoltaic
Activity	PERC cell production
code	a337f7ce215b4222858247317f3c76a1
comment	Adapted from Müller et al. (2021): A comparative life cycle assessment of silicon PV modules: Impact of module design, manufacturing location and inventory.
location	GLO
reference product	photovoltaic cell, single-Si wafer
type	process
unit	square meter
worksheet name	Renewables_SSP2-NPi_2025
Exchanges
name	amount	database	location	unit	categories	type	reference product
Aluminium III	0.000772	biosphere3		kilogram	air::urban air close to ground	biosphere
Ethane, hexafluoro-, HFC-116	0.000119	biosphere3		kilogram	air::urban air close to ground	biosphere
Hydrochloric acid	0.000266	biosphere3		kilogram	air::urban air close to ground	biosphere
Hydrogen fluoride	4.85e-06	biosphere3		kilogram	air::urban air close to ground	biosphere
Lead II	3.48e-07	biosphere3		kilogram	air::urban air close to ground	biosphere
Methane, tetrafluoro-, R-14	0.000248	biosphere3		kilogram	air::urban air close to ground	biosphere
NMVOC, non-methane volatile organic compounds	0.194	biosphere3		kilogram	air::urban air close to ground	biosphere
Nitrogen oxides	5e-05	biosphere3		kilogram	air::urban air close to ground	biosphere
Particulate Matter, < 2.5 um	0.00266	biosphere3		kilogram	air::urban air close to ground	biosphere
Silicon	7.27e-05	biosphere3		kilogram	air::urban air close to ground	biosphere
Water	0.0168	biosphere3		cubic meter	air	biosphere
Water	0.277	biosphere3		cubic meter	water	biosphere
Water, cooling, unspecified natural origin	0.231	biosphere3		cubic meter	natural resource::in water	biosphere
PERC cell production	1	Renewables_SSP2-NPi_2025	GLO	square meter		production	photovoltaic cell, single-Si wafer
TMAl purification	0.000288	Renewables_SSP2-NPi_2025	GLO	kilogram		technosphere	trimethylaluminium, solar grade
market for ammonia, anhydrous, liquid	0.0165	ecoinvent_3.9.1_cutoff_PV_update	RoW	kilogram		technosphere	ammonia, anhydrous, liquid
market for calcium chloride	0.207	ecoinvent_3.9.1_cutoff_PV_update	RoW	kilogram		technosphere	calcium chloride
market for hydrochloric acid, without water, in 30% solution state	0.0681	ecoinvent_3.9.1_cutoff_PV_update	RER	kilogram		technosphere	hydrochloric acid, without water, in 30% solution state
market for hydrogen fluoride	0.0747	ecoinvent_3.9.1_cutoff_PV_update	RoW	kilogram		technosphere	hydrogen fluoride
market for hydrogen peroxide, without water, in 50% solution state	0.094	ecoinvent_3.9.1_cutoff_PV_update	RoW	kilogram		technosphere	hydrogen peroxide, without water, in 50% solution state
market for metallization paste, back side, aluminium	0.00901	ecoinvent_3.9.1_cutoff_PV_update	RER	kilogram		technosphere	metallization paste, back side, aluminium
market for nitric acid, without water, in 50% solution state	0.0822	ecoinvent_3.9.1_cutoff_PV_update	RoW	kilogram		technosphere	nitric acid, without water, in 50% solution state
market for nitrogen, liquid	2.62	ecoinvent_3.9.1_cutoff_PV_update	RER	kilogram		technosphere	nitrogen, liquid
market for nitrous oxide	0.00766	ecoinvent_3.9.1_cutoff_PV_update	GLO	kilogram		technosphere	nitrous oxide
market for oxygen, liquid	0.334	ecoinvent_3.9.1_cutoff_PV_update	RER	kilogram		technosphere	oxygen, liquid
market for phosphorus oxychloride	0.000182	ecoinvent_3.9.1_cutoff_PV_update	RER	kilogram		technosphere	phosphorus oxychloride
market for photovoltaic cell factory	4e-07	ecoinvent_3.9.1_cutoff_PV_update	GLO	unit		technosphere	photovoltaic cell factory
market for potassium hydroxide	0.151	ecoinvent_3.9.1_cutoff_PV_update	GLO	kilogram		technosphere	potassium hydroxide
market for propane	0.0414	ecoinvent_3.9.1_cutoff_PV_update	GLO	kilogram		technosphere	propane
market for silicon tetrahydride	0.00283	ecoinvent_3.9.1_cutoff_PV_update	GLO	kilogram		technosphere	silicon tetrahydride
market for solvent, organic	0.0123	ecoinvent_3.9.1_cutoff_PV_update	GLO	kilogram		technosphere	solvent, organic
market for sulfuric acid	0.0206	ecoinvent_3.9.1_cutoff_PV_update	RoW	kilogram		technosphere	sulfuric acid
market for waste, from silicon wafer production, inorganic	0.00641	ecoinvent_3.9.1_cutoff_PV_update	GLO	kilogram		technosphere	waste, from silicon wafer production, inorganic
market for wastewater from PV cell production	0.0132	ecoinvent_3.9.1_cutoff_PV_update	RoW	cubic meter		technosphere	wastewater from PV cell production
market for water, completely softened	23.2	ecoinvent_3.9.1_cutoff_PV_update	RoW	kilogram		technosphere	water, completely softened
market for water, deionised	39.4	ecoinvent_3.9.1_cutoff_PV_update	RoW	kilogram		technosphere	water, deionised
market group for electricity, medium voltage	6.03	ecoinvent_3.9.1_cutoff_PV_update	GLO	kilowatt hour		technosphere	electricity, medium voltage
market group for heat, district or industrial, natural gas	3.55	ecoinvent_3.9.1_cutoff_PV_update	GLO	megajoule		technosphere	heat, district or industrial, natural gas
metallization paste production, back side	0.00102	Renewables_SSP2-NPi_2025	GLO	kilogram		technosphere	metallization paste, back side
metallization paste production, front side	0.00348	ecoinvent_3.9.1_cutoff_PV_update	RoW	kilogram		technosphere	metallization paste, front side
single-crystalline Si wafering & bricking	1.02	Renewables_SSP2-NPi_2025	GLO	square meter		technosphere	single-Si wafer, photovoltaic
Activity	PERC cell production
code	e827ac6ae98f43dfa5fc07cf28681fad
comment	Adapted from Müller et al. (2021): A comparative life cycle assessment of silicon PV modules: Impact of module design, manufacturing location and inventory.
location	CN
reference product	photovoltaic cell, single-Si wafer
type	process
unit	square meter
worksheet name	Renewables_SSP2-NPi_2025
Exchanges
name	amount	database	location	unit	categories	type	reference product
Aluminium III	0.000772	biosphere3		kilogram	air::urban air close to ground	biosphere
Ethane, hexafluoro-, HFC-116	0.000119	biosphere3		kilogram	air::urban air close to ground	biosphere
Hydrochloric acid	0.000266	biosphere3		kilogram	air::urban air close to ground	biosphere
Hydrogen fluoride	4.85e-06	biosphere3		kilogram	air::urban air close to ground	biosphere
Lead II	3.48e-07	biosphere3		kilogram	air::urban air close to ground	biosphere
Methane, tetrafluoro-, R-14	0.000248	biosphere3		kilogram	air::urban air close to ground	biosphere
NMVOC, non-methane volatile organic compounds	0.194	biosphere3		kilogram	air::urban air close to ground	biosphere
Nitrogen oxides	5e-05	biosphere3		kilogram	air::urban air close to ground	biosphere
Particulate Matter, < 2.5 um	0.00266	biosphere3		kilogram	air::urban air close to ground	biosphere
Silicon	7.27e-05	biosphere3		kilogram	air::urban air close to ground	biosphere
Water	0.0168	biosphere3		cubic meter	air	biosphere
Water	0.277	biosphere3		cubic meter	water	biosphere
Water, cooling, unspecified natural origin	0.231	biosphere3		cubic meter	natural resource::in water	biosphere
PERC cell production	1	Renewables_SSP2-NPi_2025	CN	square meter		production	photovoltaic cell, single-Si wafer
TMAl purification	0.000288	Renewables_SSP2-NPi_2025	GLO	kilogram		technosphere	trimethylaluminium, solar grade
market for ammonia, anhydrous, liquid	0.0165	ecoinvent_3.9.1_cutoff_PV_update	CN	kilogram		technosphere	ammonia, anhydrous, liquid
market for calcium chloride	0.207	ecoinvent_3.9.1_cutoff_PV_update	RoW	kilogram		technosphere	calcium chloride
market for hydrochloric acid, without water, in 30% solution state	0.0681	ecoinvent_3.9.1_cutoff_PV_update	RoW	kilogram		technosphere	hydrochloric acid, without water, in 30% solution state
market for hydrogen fluoride	0.0747	ecoinvent_3.9.1_cutoff_PV_update	RoW	kilogram		technosphere	hydrogen fluoride
market for hydrogen peroxide, without water, in 50% solution state	0.094	ecoinvent_3.9.1_cutoff_PV_update	RoW	kilogram		technosphere	hydrogen peroxide, without water, in 50% solution state
market for metallization paste, back side, aluminium	0.00901	ecoinvent_3.9.1_cutoff_PV_update	RoW	kilogram		technosphere	metallization paste, back side, aluminium
market for metallization paste, front side	0.00348	ecoinvent_3.9.1_cutoff_PV_update	RoW	kilogram		technosphere	metallization paste, front side
market for nitric acid, without water, in 50% solution state	0.0822	ecoinvent_3.9.1_cutoff_PV_update	CN	kilogram		technosphere	nitric acid, without water, in 50% solution state
market for nitrogen, liquid	2.62	ecoinvent_3.9.1_cutoff_PV_update	RoW	kilogram		technosphere	nitrogen, liquid
market for nitrous oxide	0.00766	ecoinvent_3.9.1_cutoff_PV_update	GLO	kilogram		technosphere	nitrous oxide
market for oxygen, liquid	0.334	ecoinvent_3.9.1_cutoff_PV_update	RoW	kilogram		technosphere	oxygen, liquid
market for phosphorus oxychloride	0.000182	ecoinvent_3.9.1_cutoff_PV_update	RoW	kilogram		technosphere	phosphorus oxychloride
market for photovoltaic cell factory	4e-07	ecoinvent_3.9.1_cutoff_PV_update	GLO	unit		technosphere	photovoltaic cell factory
market for potassium hydroxide	0.151	ecoinvent_3.9.1_cutoff_PV_update	GLO	kilogram		technosphere	potassium hydroxide
market for propane	0.0414	ecoinvent_3.9.1_cutoff_PV_update	GLO	kilogram		technosphere	propane
market for silicon tetrahydride	0.00283	ecoinvent_3.9.1_cutoff_PV_update	GLO	kilogram		technosphere	silicon tetrahydride
market for solvent, organic	0.0123	ecoinvent_3.9.1_cutoff_PV_update	GLO	kilogram		technosphere	solvent, organic
market for sulfuric acid	0.0206	ecoinvent_3.9.1_cutoff_PV_update	RoW	kilogram		technosphere	sulfuric acid
market for waste, from silicon wafer production, inorganic	0.00641	ecoinvent_3.9.1_cutoff_PV_update	GLO	kilogram		technosphere	waste, from silicon wafer production, inorganic
market for wastewater from PV cell production	0.0132	ecoinvent_3.9.1_cutoff_PV_update	RoW	cubic meter		technosphere	wastewater from PV cell production
market for water, completely softened	23.2	ecoinvent_3.9.1_cutoff_PV_update	RoW	kilogram		technosphere	water, completely softened
market for water, deionised	39.4	ecoinvent_3.9.1_cutoff_PV_update	RoW	kilogram		technosphere	water, deionised
market group for electricity, medium voltage	6.03	ecoinvent_3.9.1_cutoff_PV_update	CN	kilowatt hour		technosphere	electricity, medium voltage
market group for heat, district or industrial, natural gas	3.55	ecoinvent_3.9.1_cutoff_PV_update	GLO	megajoule		technosphere	heat, district or industrial, natural gas
metallization paste production, back side	0.00102	Renewables_SSP2-NPi_2025	CN	kilogram		technosphere	metallization paste, back side
single-crystalline Si wafering & bricking	1.02	Renewables_SSP2-NPi_2025	CN	square meter		technosphere	single-Si wafer, photovoltaic
Activity	Silicon production, solar grade, modified Siemens process
code	18b998e2902c4d2784fa648c53691163
comment	Adapted from Müller et al. (2021): A comparative life cycle assessment of silicon PV modules: Impact of module design, manufacturing location and inventory.
location	RoW
reference product	silicon, metallurgical grade
type	process
unit	kilogram
worksheet name	Renewables_SSP2-NPi_2025
Exchanges
name	amount	database	location	unit	categories	type	reference product
Aluminium III	1.55e-06	biosphere3		kilogram	air::non-urban air or from high stacks	biosphere
Antimony ion	7.85e-09	biosphere3		kilogram	air::non-urban air or from high stacks	biosphere
Arsenic ion	9.42e-09	biosphere3		kilogram	air::non-urban air or from high stacks	biosphere
Boron	2.79e-07	biosphere3		kilogram	air::non-urban air or from high stacks	biosphere
Cadmium II	3.14e-10	biosphere3		kilogram	air::non-urban air or from high stacks	biosphere
Calcium	7.75e-07	biosphere3		kilogram	air::non-urban air or from high stacks	biosphere
Carbon dioxide, fossil	3.58	biosphere3		kilogram	air::non-urban air or from high stacks	biosphere
Carbon dioxide, non-fossil	1.61	biosphere3		kilogram	air::non-urban air or from high stacks	biosphere
Carbon monoxide, fossil	0.00138	biosphere3		kilogram	air::non-urban air or from high stacks	biosphere
Carbon monoxide, non-fossil	0.00062	biosphere3		kilogram	air::non-urban air or from high stacks	biosphere
Chlorine	7.85e-08	biosphere3		kilogram	air::non-urban air or from high stacks	biosphere
Chromium III	7.85e-09	biosphere3		kilogram	air::non-urban air or from high stacks	biosphere
Cyanide	6.87e-06	biosphere3		kilogram	air::non-urban air or from high stacks	biosphere
Fluorine	3.88e-08	biosphere3		kilogram	air::non-urban air or from high stacks	biosphere
Hydrogen fluoride	0.0005	biosphere3		kilogram	air::non-urban air or from high stacks	biosphere
Hydrogen sulfide	0.0005	biosphere3		kilogram	air::non-urban air or from high stacks	biosphere
Iron ion	3.88e-06	biosphere3		kilogram	air::non-urban air or from high stacks	biosphere
Lead II	3.44e-07	biosphere3		kilogram	air::non-urban air or from high stacks	biosphere
Mercury II	7.85e-09	biosphere3		kilogram	air::non-urban air or from high stacks	biosphere
NMVOC, non-methane volatile organic compounds	9.6e-05	biosphere3		kilogram	air::non-urban air or from high stacks	biosphere
Nitrogen oxides	0.00974	biosphere3		kilogram	air::non-urban air or from high stacks	biosphere
Particulate Matter, > 10 um	0.00775	biosphere3		kilogram	air::non-urban air or from high stacks	biosphere
Potassium I	6.2e-05	biosphere3		kilogram	air::non-urban air or from high stacks	biosphere
Silicon	0.00751	biosphere3		kilogram	air::non-urban air or from high stacks	biosphere
Sodium	7.75e-07	biosphere3		kilogram	air::non-urban air or from high stacks	biosphere
Sulfur dioxide	0.0122	biosphere3		kilogram	air::non-urban air or from high stacks	biosphere
Tin ion	7.85e-09	biosphere3		kilogram	air::non-urban air or from high stacks	biosphere
Silicon production, solar grade, modified Siemens process	1	Renewables_SSP2-NPi_2025	RoW	kilogram		production	silicon, metallurgical grade
market for charcoal	0.17	ecoinvent_3.9.1_cutoff_PV_update	GLO	kilogram		technosphere	charcoal
market for coke	23.1	ecoinvent_3.9.1_cutoff_PV_update	GLO	megajoule		technosphere	coke
market for graphite	0.1	ecoinvent_3.9.1_cutoff_PV_update	GLO	kilogram		technosphere	graphite
market for oxygen, liquid	0.02	ecoinvent_3.9.1_cutoff_PV_update	RoW	kilogram		technosphere	oxygen, liquid
market for petroleum coke	0.5	ecoinvent_3.9.1_cutoff_PV_update	GLO	kilogram		technosphere	petroleum coke
market for silica sand	2.7	ecoinvent_3.9.1_cutoff_PV_update	GLO	kilogram		technosphere	silica sand
market for silicone factory	1e-11	ecoinvent_3.9.1_cutoff_PV_update	GLO	unit		technosphere	silicone factory
market for slag from metallurgical grade silicon production	0.025	ecoinvent_3.9.1_cutoff_PV_update	GLO	kilogram		technosphere	slag from metallurgical grade silicon production
market for wood chips, wet, measured as dry mass	0.55	ecoinvent_3.9.1_cutoff_PV_update	RoW	kilogram		technosphere	wood chips, wet, measured as dry mass
market group for electricity, medium voltage	11	Renewables_SSP2-NPi_2025	PV producing countries except China/Europe	kilowatt hour		technosphere	electricity, medium voltage
Activity	Silicon production, solar grade, modified Siemens process
code	23755fc43a1342d09175a9f19d048b3a
comment	Adapted from Müller et al. (2021): A comparative life cycle assessment of silicon PV modules: Impact of module design, manufacturing location and inventory.
location	RER
reference product	silicon, metallurgical grade
type	process
unit	kilogram
worksheet name	Renewables_SSP2-NPi_2025
Exchanges
name	amount	database	location	unit	categories	type	reference product
Aluminium III	1.55e-06	biosphere3		kilogram	air::non-urban air or from high stacks	biosphere
Antimony ion	7.85e-09	biosphere3		kilogram	air::non-urban air or from high stacks	biosphere
Arsenic ion	9.42e-09	biosphere3		kilogram	air::non-urban air or from high stacks	biosphere
Boron	2.79e-07	biosphere3		kilogram	air::non-urban air or from high stacks	biosphere
Cadmium II	3.14e-10	biosphere3		kilogram	air::non-urban air or from high stacks	biosphere
Calcium	7.75e-07	biosphere3		kilogram	air::non-urban air or from high stacks	biosphere
Carbon dioxide, fossil	3.58	biosphere3		kilogram	air::non-urban air or from high stacks	biosphere
Carbon dioxide, non-fossil	1.61	biosphere3		kilogram	air::non-urban air or from high stacks	biosphere
Carbon monoxide, fossil	0.00138	biosphere3		kilogram	air::non-urban air or from high stacks	biosphere
Carbon monoxide, non-fossil	0.00062	biosphere3		kilogram	air::non-urban air or from high stacks	biosphere
Chlorine	7.85e-08	biosphere3		kilogram	air::non-urban air or from high stacks	biosphere
Chromium III	7.85e-09	biosphere3		kilogram	air::non-urban air or from high stacks	biosphere
Cyanide	6.87e-06	biosphere3		kilogram	air::non-urban air or from high stacks	biosphere
Fluorine	3.88e-08	biosphere3		kilogram	air::non-urban air or from high stacks	biosphere
Hydrogen fluoride	0.0005	biosphere3		kilogram	air::non-urban air or from high stacks	biosphere
Hydrogen sulfide	0.0005	biosphere3		kilogram	air::non-urban air or from high stacks	biosphere
Iron ion	3.88e-06	biosphere3		kilogram	air::non-urban air or from high stacks	biosphere
Lead II	3.44e-07	biosphere3		kilogram	air::non-urban air or from high stacks	biosphere
Mercury II	7.85e-09	biosphere3		kilogram	air::non-urban air or from high stacks	biosphere
NMVOC, non-methane volatile organic compounds	9.6e-05	biosphere3		kilogram	air::non-urban air or from high stacks	biosphere
Nitrogen oxides	0.00974	biosphere3		kilogram	air::non-urban air or from high stacks	biosphere
Particulate Matter, > 10 um	0.00775	biosphere3		kilogram	air::non-urban air or from high stacks	biosphere
Potassium I	6.2e-05	biosphere3		kilogram	air::non-urban air or from high stacks	biosphere
Silicon	0.00751	biosphere3		kilogram	air::non-urban air or from high stacks	biosphere
Sodium	7.75e-07	biosphere3		kilogram	air::non-urban air or from high stacks	biosphere
Sulfur dioxide	0.0122	biosphere3		kilogram	air::non-urban air or from high stacks	biosphere
Tin ion	7.85e-09	biosphere3		kilogram	air::non-urban air or from high stacks	biosphere
Silicon production, solar grade, modified Siemens process	1	Renewables_SSP2-NPi_2025	RER	kilogram		production	silicon, metallurgical grade
coking	23.1	ecoinvent_3.9.1_cutoff_PV_update	DE	megajoule		technosphere	coke
graphite production	0.1	ecoinvent_3.9.1_cutoff_PV_update	RER	kilogram		technosphere	graphite
market for charcoal	0.17	ecoinvent_3.9.1_cutoff_PV_update	GLO	kilogram		technosphere	charcoal
market for oxygen, liquid	0.02	ecoinvent_3.9.1_cutoff_PV_update	RER	kilogram		technosphere	oxygen, liquid
market for slag from metallurgical grade silicon production	0.025	ecoinvent_3.9.1_cutoff_PV_update	GLO	kilogram		technosphere	slag from metallurgical grade silicon production
market for wood chips, wet, measured as dry mass	0.55	ecoinvent_3.9.1_cutoff_PV_update	Europe without Switzerland	kilogram		technosphere	wood chips, wet, measured as dry mass
market group for electricity, medium voltage	11	ecoinvent_3.9.1_cutoff_PV_update	RER	kilowatt hour		technosphere	electricity, medium voltage
petroleum coke production, petroleum refinery operation	0.5	ecoinvent_3.9.1_cutoff_PV_update	Europe without Switzerland	kilogram		technosphere	petroleum coke
silica sand production	2.7	ecoinvent_3.9.1_cutoff_PV_update	DE	kilogram		technosphere	silica sand
silicone factory construction	1e-11	ecoinvent_3.9.1_cutoff_PV_update	RER	unit		technosphere	silicone factory
Activity	Silicon production, solar grade, modified Siemens process
code	3ba97fa55a8940ed89c273e9f9933724
comment	Adapted from Müller et al. (2021): A comparative life cycle assessment of silicon PV modules: Impact of module design, manufacturing location and inventory.
location	GLO
reference product	silicon, metallurgical grade
type	process
unit	kilogram
worksheet name	Renewables_SSP2-NPi_2025
Exchanges
name	amount	database	location	unit	categories	type	reference product
Aluminium III	1.55e-06	biosphere3		kilogram	air::non-urban air or from high stacks	biosphere
Antimony ion	7.85e-09	biosphere3		kilogram	air::non-urban air or from high stacks	biosphere
Arsenic ion	9.42e-09	biosphere3		kilogram	air::non-urban air or from high stacks	biosphere
Boron	2.79e-07	biosphere3		kilogram	air::non-urban air or from high stacks	biosphere
Cadmium II	3.14e-10	biosphere3		kilogram	air::non-urban air or from high stacks	biosphere
Calcium	7.75e-07	biosphere3		kilogram	air::non-urban air or from high stacks	biosphere
Carbon dioxide, fossil	3.58	biosphere3		kilogram	air::non-urban air or from high stacks	biosphere
Carbon dioxide, non-fossil	1.61	biosphere3		kilogram	air::non-urban air or from high stacks	biosphere
Carbon monoxide, fossil	0.00138	biosphere3		kilogram	air::non-urban air or from high stacks	biosphere
Carbon monoxide, non-fossil	0.00062	biosphere3		kilogram	air::non-urban air or from high stacks	biosphere
Chlorine	7.85e-08	biosphere3		kilogram	air::non-urban air or from high stacks	biosphere
Chromium III	7.85e-09	biosphere3		kilogram	air::non-urban air or from high stacks	biosphere
Cyanide	6.87e-06	biosphere3		kilogram	air::non-urban air or from high stacks	biosphere
Fluorine	3.88e-08	biosphere3		kilogram	air::non-urban air or from high stacks	biosphere
Hydrogen fluoride	0.0005	biosphere3		kilogram	air::non-urban air or from high stacks	biosphere
Hydrogen sulfide	0.0005	biosphere3		kilogram	air::non-urban air or from high stacks	biosphere
Iron ion	3.88e-06	biosphere3		kilogram	air::non-urban air or from high stacks	biosphere
Lead II	3.44e-07	biosphere3		kilogram	air::non-urban air or from high stacks	biosphere
Mercury II	7.85e-09	biosphere3		kilogram	air::non-urban air or from high stacks	biosphere
NMVOC, non-methane volatile organic compounds	9.6e-05	biosphere3		kilogram	air::non-urban air or from high stacks	biosphere
Nitrogen oxides	0.00974	biosphere3		kilogram	air::non-urban air or from high stacks	biosphere
Particulate Matter, > 10 um	0.00775	biosphere3		kilogram	air::non-urban air or from high stacks	biosphere
Potassium I	6.2e-05	biosphere3		kilogram	air::non-urban air or from high stacks	biosphere
Silicon	0.00751	biosphere3		kilogram	air::non-urban air or from high stacks	biosphere
Sodium	7.75e-07	biosphere3		kilogram	air::non-urban air or from high stacks	biosphere
Sulfur dioxide	0.0122	biosphere3		kilogram	air::non-urban air or from high stacks	biosphere
Tin ion	7.85e-09	biosphere3		kilogram	air::non-urban air or from high stacks	biosphere
Silicon production, solar grade, modified Siemens process	1	Renewables_SSP2-NPi_2025	GLO	kilogram		production	silicon, metallurgical grade
market for charcoal	0.17	ecoinvent_3.9.1_cutoff_PV_update	GLO	kilogram		technosphere	charcoal
market for coke	23.1	ecoinvent_3.9.1_cutoff_PV_update	GLO	megajoule		technosphere	coke
market for graphite	0.1	ecoinvent_3.9.1_cutoff_PV_update	GLO	kilogram		technosphere	graphite
market for oxygen, liquid	0.02	ecoinvent_3.9.1_cutoff_PV_update	RER	kilogram		technosphere	oxygen, liquid
market for petroleum coke	0.5	ecoinvent_3.9.1_cutoff_PV_update	GLO	kilogram		technosphere	petroleum coke
market for silica sand	2.7	ecoinvent_3.9.1_cutoff_PV_update	GLO	kilogram		technosphere	silica sand
market for slag from metallurgical grade silicon production	0.025	ecoinvent_3.9.1_cutoff_PV_update	GLO	kilogram		technosphere	slag from metallurgical grade silicon production
market for wood chips, wet, measured as dry mass	0.55	ecoinvent_3.9.1_cutoff_PV_update	Europe without Switzerland	kilogram		technosphere	wood chips, wet, measured as dry mass
market group for electricity, medium voltage	11	ecoinvent_3.9.1_cutoff_PV_update	GLO	kilowatt hour		technosphere	electricity, medium voltage
silicone factory construction	1e-11	ecoinvent_3.9.1_cutoff_PV_update	RER	unit		technosphere	silicone factory
Activity	Silicon production, solar grade, modified Siemens process
code	b917906e98da4859babc2a645637c854
comment	Adapted from Müller et al. (2021): A comparative life cycle assessment of silicon PV modules: Impact of module design, manufacturing location and inventory.
location	CN
reference product	silicon, metallurgical grade
type	process
unit	kilogram
worksheet name	Renewables_SSP2-NPi_2025
Exchanges
name	amount	database	location	unit	categories	type	reference product
Aluminium III	1.55e-06	biosphere3		kilogram	air::non-urban air or from high stacks	biosphere
Antimony ion	7.85e-09	biosphere3		kilogram	air::non-urban air or from high stacks	biosphere
Arsenic ion	9.42e-09	biosphere3		kilogram	air::non-urban air or from high stacks	biosphere
Boron	2.79e-07	biosphere3		kilogram	air::non-urban air or from high stacks	biosphere
Cadmium II	3.14e-10	biosphere3		kilogram	air::non-urban air or from high stacks	biosphere
Calcium	7.75e-07	biosphere3		kilogram	air::non-urban air or from high stacks	biosphere
Carbon dioxide, fossil	3.58	biosphere3		kilogram	air::non-urban air or from high stacks	biosphere
Carbon dioxide, non-fossil	1.61	biosphere3		kilogram	air::non-urban air or from high stacks	biosphere
Carbon monoxide, fossil	0.00138	biosphere3		kilogram	air::non-urban air or from high stacks	biosphere
Carbon monoxide, non-fossil	0.00062	biosphere3		kilogram	air::non-urban air or from high stacks	biosphere
Chlorine	7.85e-08	biosphere3		kilogram	air::non-urban air or from high stacks	biosphere
Chromium III	7.85e-09	biosphere3		kilogram	air::non-urban air or from high stacks	biosphere
Cyanide	6.87e-06	biosphere3		kilogram	air::non-urban air or from high stacks	biosphere
Fluorine	3.88e-08	biosphere3		kilogram	air::non-urban air or from high stacks	biosphere
Hydrogen fluoride	0.0005	biosphere3		kilogram	air::non-urban air or from high stacks	biosphere
Hydrogen sulfide	0.0005	biosphere3		kilogram	air::non-urban air or from high stacks	biosphere
Iron ion	3.88e-06	biosphere3		kilogram	air::non-urban air or from high stacks	biosphere
Lead II	3.44e-07	biosphere3		kilogram	air::non-urban air or from high stacks	biosphere
Mercury II	7.85e-09	biosphere3		kilogram	air::non-urban air or from high stacks	biosphere
NMVOC, non-methane volatile organic compounds	9.6e-05	biosphere3		kilogram	air::non-urban air or from high stacks	biosphere
Nitrogen oxides	0.00974	biosphere3		kilogram	air::non-urban air or from high stacks	biosphere
Particulate Matter, > 10 um	0.00775	biosphere3		kilogram	air::non-urban air or from high stacks	biosphere
Potassium I	6.2e-05	biosphere3		kilogram	air::non-urban air or from high stacks	biosphere
Silicon	0.00751	biosphere3		kilogram	air::non-urban air or from high stacks	biosphere
Sodium	7.75e-07	biosphere3		kilogram	air::non-urban air or from high stacks	biosphere
Sulfur dioxide	0.0122	biosphere3		kilogram	air::non-urban air or from high stacks	biosphere
Tin ion	7.85e-09	biosphere3		kilogram	air::non-urban air or from high stacks	biosphere
Silicon production, solar grade, modified Siemens process	1	Renewables_SSP2-NPi_2025	CN	kilogram		production	silicon, metallurgical grade
market for charcoal	0.17	ecoinvent_3.9.1_cutoff_PV_update	GLO	kilogram		technosphere	charcoal
market for coke	23.1	ecoinvent_3.9.1_cutoff_PV_update	GLO	megajoule		technosphere	coke
market for graphite	0.1	ecoinvent_3.9.1_cutoff_PV_update	GLO	kilogram		technosphere	graphite
market for oxygen, liquid	0.02	ecoinvent_3.9.1_cutoff_PV_update	RoW	kilogram		technosphere	oxygen, liquid
market for petroleum coke	0.5	ecoinvent_3.9.1_cutoff_PV_update	GLO	kilogram		technosphere	petroleum coke
market for silica sand	2.7	ecoinvent_3.9.1_cutoff_PV_update	GLO	kilogram		technosphere	silica sand
market for silicone factory	1e-11	ecoinvent_3.9.1_cutoff_PV_update	GLO	unit		technosphere	silicone factory
market for slag from metallurgical grade silicon production	0.025	ecoinvent_3.9.1_cutoff_PV_update	GLO	kilogram		technosphere	slag from metallurgical grade silicon production
market for wood chips, wet, measured as dry mass	0.55	ecoinvent_3.9.1_cutoff_PV_update	RoW	kilogram		technosphere	wood chips, wet, measured as dry mass
market group for electricity, medium voltage	11	ecoinvent_3.9.1_cutoff_PV_update	CN	kilowatt hour		technosphere	electricity, medium voltage
Activity	TMAl purification
code	47a7994c449044308d09b9771949d0d6
comment	Adapted from Müller et al. (2021): A comparative life cycle assessment of silicon PV modules: Impact of module design, manufacturing location and inventory.
location	GLO
reference product	trimethylaluminium, solar grade
type	process
unit	kilogram
worksheet name	Renewables_SSP2-NPi_2025
Exchanges
name	amount	database	location	unit	type	reference product
TMAl purification	1	Renewables_SSP2-NPi_2025	GLO	kilogram	production	trimethylaluminium, solar grade
market for hazardous waste, for incineration	60	ecoinvent_3.9.1_cutoff_PV_update	RoW	kilogram	technosphere	hazardous waste, for incineration
market for helium	0.4	ecoinvent_3.9.1_cutoff_PV_update	GLO	kilogram	technosphere	helium
market for sodium	20	ecoinvent_3.9.1_cutoff_PV_update	GLO	kilogram	technosphere	sodium
market group for electricity, medium voltage	0.56	ecoinvent_3.9.1_cutoff_PV_update	GLO	kilowatt hour	technosphere	electricity, medium voltage
trimethylaluminium production, 98.5%	100	Renewables_SSP2-NPi_2025	GLO	kilogram	technosphere	trimethylaluminium, 98.5%
Activity	Takeback & recycling of glass-backsheet sc-Si modules
code	14438c62139744c99d64961d05cc9dfc
comment	Adapted from Müller et al. (2021): A comparative life cycle assessment of silicon PV modules: Impact of module design, manufacturing location and inventory.
location	RER
reference product	Takeback & recycling of glass-backsheet sc-Si modules
type	process
unit	kilogram
worksheet name	Renewables_SSP2-NPi_2025
Exchanges
name	amount	database	location	unit	categories	type	reference product
Carbon dioxide, fossil	-0.126	biosphere3		kilogram	air	biosphere
Takeback & recycling of glass-backsheet sc-Si modules	1	Renewables_SSP2-NPi_2025	RER	kilogram		production	Takeback & recycling of glass-backsheet sc-Si modules
market for aluminium, primary, ingot	-0.0562	ecoinvent_3.9.1_cutoff_PV_update	IAI Area, EU27 & EFTA	kilogram		technosphere	aluminium, primary, ingot
market for copper, cathode	-0.00661	ecoinvent_3.9.1_cutoff_PV_update	GLO	kilogram		technosphere	copper, cathode
market for diesel, burned in building machine	0.0648	ecoinvent_3.9.1_cutoff_PV_update	GLO	megajoule		technosphere	diesel, burned in building machine
market for lime, packed	-0.242	ecoinvent_3.9.1_cutoff_PV_update	Europe without Switzerland	kilogram		technosphere	lime, packed
market group for electricity, medium voltage	0.111	ecoinvent_3.9.1_cutoff_PV_update	RER	kilowatt hour		technosphere	electricity, medium voltage
market group for heat, district or industrial, natural gas	-0.83	ecoinvent_3.9.1_cutoff_PV_update	RER	megajoule		technosphere	heat, district or industrial, natural gas
market group for heat, district or industrial, other than natural gas	-0.538	ecoinvent_3.9.1_cutoff_PV_update	RER	megajoule		technosphere	heat, district or industrial, other than natural gas
silica sand production	-0.35	ecoinvent_3.9.1_cutoff_PV_update	DE	kilogram		technosphere	silica sand
soda production, solvay process	-0.138	ecoinvent_3.9.1_cutoff_PV_update	RER	kilogram		technosphere	soda ash, light
transport, freight, lorry 16-32 metric ton, EURO5	0.4	ecoinvent_3.9.1_cutoff_PV_update	RER	ton kilometer		technosphere	transport, freight, lorry 16-32 metric ton, EURO5
transport, freight, lorry 3.5-7.5 metric ton, EURO5	0.1	ecoinvent_3.9.1_cutoff_PV_update	RER	ton kilometer		technosphere	transport, freight, lorry 3.5-7.5 metric ton, EURO5
treatment of aluminium scrap, post-consumer, prepared for recycling, at remelter	0.0562	ecoinvent_3.9.1_cutoff_PV_update	RER	kilogram		technosphere	aluminium, wrought alloy
treatment of used cable	0.00661	ecoinvent_3.9.1_cutoff_PV_update	GLO	kilogram		technosphere	copper, cathode
treatment of waste plastic, mixture, municipal incineration	0.151	ecoinvent_3.9.1_cutoff_PV_update	RoW	kilogram		technosphere	waste plastic, mixture
treatment of waste plastic, mixture, sanitary landfill	0.0264	ecoinvent_3.9.1_cutoff_PV_update	RoW	kilogram		technosphere	waste plastic, mixture
Activity	Takeback & recycling of glass-backsheet sc-Si modules
code	15ade8ef8c9d454d927968b116ddcf58
comment	Adapted from Müller et al. (2021): A comparative life cycle assessment of silicon PV modules: Impact of module design, manufacturing location and inventory.
location	RoW
reference product	Takeback & recycling of glass-backsheet sc-Si modules
type	process
unit	kilogram
worksheet name	Renewables_SSP2-NPi_2025
Exchanges
name	amount	database	location	unit	categories	type	reference product
Carbon dioxide, fossil	-0.126	biosphere3		kilogram	air	biosphere
Takeback & recycling of glass-backsheet sc-Si modules	1	Renewables_SSP2-NPi_2025	RoW	kilogram		production	Takeback & recycling of glass-backsheet sc-Si modules
diesel, burned in building machine	0.0648	ecoinvent_3.9.1_cutoff_PV_update	GLO	megajoule		technosphere	diesel, burned in building machine
heat production, heavy fuel oil, at industrial furnace 1MW	-0.538	ecoinvent_3.9.1_cutoff_PV_update	RoW	megajoule		technosphere	heat, district or industrial, other than natural gas
market for aluminium, primary, ingot	-0.0562	ecoinvent_3.9.1_cutoff_PV_update	RoW	kilogram		technosphere	aluminium, primary, ingot
market for copper, cathode	-0.00661	ecoinvent_3.9.1_cutoff_PV_update	GLO	kilogram		technosphere	copper, cathode
market for heat, district or industrial, natural gas	-0.83	ecoinvent_3.9.1_cutoff_PV_update	RoW	megajoule		technosphere	heat, district or industrial, natural gas
market for lime, packed	-0.242	ecoinvent_3.9.1_cutoff_PV_update	RoW	kilogram		technosphere	lime, packed
market for silica sand	-0.35	ecoinvent_3.9.1_cutoff_PV_update	GLO	kilogram		technosphere	silica sand
market group for electricity, medium voltage	0.111	Renewables_SSP2-NPi_2025	PV producing countries except China/Europe	kilowatt hour		technosphere	electricity, medium voltage
soda production, solvay process	-0.138	ecoinvent_3.9.1_cutoff_PV_update	RoW	kilogram		technosphere	soda ash, light
transport, freight, lorry 16-32 metric ton, EURO5	0.4	ecoinvent_3.9.1_cutoff_PV_update	RoW	ton kilometer		technosphere	transport, freight, lorry 16-32 metric ton, EURO5
transport, freight, lorry 3.5-7.5 metric ton, EURO5	0.1	ecoinvent_3.9.1_cutoff_PV_update	RoW	ton kilometer		technosphere	transport, freight, lorry 3.5-7.5 metric ton, EURO5
treatment of aluminium scrap, post-consumer, prepared for recycling, at remelter	0.0562	ecoinvent_3.9.1_cutoff_PV_update	RoW	kilogram		technosphere	aluminium, wrought alloy
treatment of used cable	0.00661	ecoinvent_3.9.1_cutoff_PV_update	GLO	kilogram		technosphere	copper, cathode
treatment of waste plastic, mixture, municipal incineration	0.151	ecoinvent_3.9.1_cutoff_PV_update	RoW	kilogram		technosphere	waste plastic, mixture
treatment of waste plastic, mixture, sanitary landfill	0.0264	ecoinvent_3.9.1_cutoff_PV_update	RoW	kilogram		technosphere	waste plastic, mixture
Activity	Takeback & recycling of glass-backsheet sc-Si modules
code	93981a92c15945bd8fedb69ad2d4b859
comment	Adapted from Müller et al. (2021): A comparative life cycle assessment of silicon PV modules: Impact of module design, manufacturing location and inventory.
location	CN
reference product	Takeback & recycling of glass-backsheet sc-Si modules
type	process
unit	kilogram
worksheet name	Renewables_SSP2-NPi_2025
Exchanges
name	amount	database	location	unit	categories	type	reference product
Carbon dioxide, fossil	-0.126	biosphere3		kilogram	air	biosphere
Takeback & recycling of glass-backsheet sc-Si modules	1	Renewables_SSP2-NPi_2025	CN	kilogram		production	Takeback & recycling of glass-backsheet sc-Si modules
aluminium production, primary, ingot	-0.0562	ecoinvent_3.9.1_cutoff_PV_update	CN	kilogram		technosphere	aluminium, primary, ingot
copper production, cathode, solvent extraction and electrowinning process	-0.00661	ecoinvent_3.9.1_cutoff_PV_update	GLO	kilogram		technosphere	copper, cathode
diesel, burned in building machine	0.0648	ecoinvent_3.9.1_cutoff_PV_update	GLO	megajoule		technosphere	diesel, burned in building machine
heat production, heavy fuel oil, at industrial furnace 1MW	-0.538	ecoinvent_3.9.1_cutoff_PV_update	RoW	megajoule		technosphere	heat, district or industrial, other than natural gas
market for heat, district or industrial, natural gas	-0.83	ecoinvent_3.9.1_cutoff_PV_update	RoW	megajoule		technosphere	heat, district or industrial, natural gas
market for lime, packed	-0.242	ecoinvent_3.9.1_cutoff_PV_update	RoW	kilogram		technosphere	lime, packed
market for silica sand	-0.35	ecoinvent_3.9.1_cutoff_PV_update	GLO	kilogram		technosphere	silica sand
market for soda ash, light	-0.138	ecoinvent_3.9.1_cutoff_PV_update	GLO	kilogram		technosphere	soda ash, light
market group for electricity, medium voltage	0.111	ecoinvent_3.9.1_cutoff_PV_update	CN	kilowatt hour		technosphere	electricity, medium voltage
transport, freight, lorry 16-32 metric ton, EURO5	0.4	ecoinvent_3.9.1_cutoff_PV_update	RoW	ton kilometer		technosphere	transport, freight, lorry 16-32 metric ton, EURO5
transport, freight, lorry 3.5-7.5 metric ton, EURO5	0.1	ecoinvent_3.9.1_cutoff_PV_update	RoW	ton kilometer		technosphere	transport, freight, lorry 3.5-7.5 metric ton, EURO5
treatment of aluminium scrap, post-consumer, prepared for recycling, at remelter	0.0562	ecoinvent_3.9.1_cutoff_PV_update	RoW	kilogram		technosphere	aluminium, wrought alloy
treatment of used cable	0.00661	ecoinvent_3.9.1_cutoff_PV_update	GLO	kilogram		technosphere	copper, cathode
treatment of waste plastic, mixture, municipal incineration	0.151	ecoinvent_3.9.1_cutoff_PV_update	RoW	kilogram		technosphere	waste plastic, mixture
treatment of waste plastic, mixture, sanitary landfill	0.0264	ecoinvent_3.9.1_cutoff_PV_update	RoW	kilogram		technosphere	waste plastic, mixture
Activity	Takeback & recycling of glass-backsheet sc-Si modules
code	9662324086f24ec1b7f195d24a394825
comment	Adapted from Müller et al. (2021): A comparative life cycle assessment of silicon PV modules: Impact of module design, manufacturing location and inventory.
location	GLO
reference product	Takeback & recycling of glass-backsheet sc-Si modules
type	process
unit	kilogram
worksheet name	Renewables_SSP2-NPi_2025
Exchanges
name	amount	database	location	unit	categories	type	reference product
Carbon dioxide, fossil	-0.126	biosphere3		kilogram	air	biosphere
Takeback & recycling of glass-backsheet sc-Si modules	1	Renewables_SSP2-NPi_2025	GLO	kilogram		production	Takeback & recycling of glass-backsheet sc-Si modules
copper production, cathode, solvent extraction and electrowinning process	-0.00661	ecoinvent_3.9.1_cutoff_PV_update	GLO	kilogram		technosphere	copper, cathode
diesel, burned in building machine	0.0648	ecoinvent_3.9.1_cutoff_PV_update	GLO	megajoule		technosphere	diesel, burned in building machine
heat production, heavy fuel oil, at industrial furnace 1MW	-0.538	ecoinvent_3.9.1_cutoff_PV_update	Europe without Switzerland	megajoule		technosphere	heat, district or industrial, other than natural gas
market for aluminium, primary, ingot	-0.0562	ecoinvent_3.9.1_cutoff_PV_update	IAI Area, EU27 & EFTA	kilogram		technosphere	aluminium, primary, ingot
market for heat, district or industrial, natural gas	-0.83	ecoinvent_3.9.1_cutoff_PV_update	Europe without Switzerland	megajoule		technosphere	heat, district or industrial, natural gas
market for lime, packed	-0.242	ecoinvent_3.9.1_cutoff_PV_update	Europe without Switzerland	kilogram		technosphere	lime, packed
market for silica sand	-0.35	ecoinvent_3.9.1_cutoff_PV_update	GLO	kilogram		technosphere	silica sand
market for soda ash, light	-0.138	ecoinvent_3.9.1_cutoff_PV_update	GLO	kilogram		technosphere	soda ash, light
market group for electricity, medium voltage	0.111	ecoinvent_3.9.1_cutoff_PV_update	GLO	kilowatt hour		technosphere	electricity, medium voltage
transport, freight, lorry 16-32 metric ton, EURO5	0.4	ecoinvent_3.9.1_cutoff_PV_update	RER	ton kilometer		technosphere	transport, freight, lorry 16-32 metric ton, EURO5
transport, freight, lorry 3.5-7.5 metric ton, EURO5	0.1	ecoinvent_3.9.1_cutoff_PV_update	RER	ton kilometer		technosphere	transport, freight, lorry 3.5-7.5 metric ton, EURO5
treatment of aluminium scrap, post-consumer, prepared for recycling, at remelter	0.0562	ecoinvent_3.9.1_cutoff_PV_update	RER	kilogram		technosphere	aluminium, wrought alloy
treatment of used cable	0.00661	ecoinvent_3.9.1_cutoff_PV_update	GLO	kilogram		technosphere	copper, cathode
treatment of waste plastic, mixture, municipal incineration	0.151	ecoinvent_3.9.1_cutoff_PV_update	RoW	kilogram		technosphere	waste plastic, mixture
treatment of waste plastic, mixture, sanitary landfill	0.0264	ecoinvent_3.9.1_cutoff_PV_update	RoW	kilogram		technosphere	waste plastic, mixture
Activity	Takeback & recycling of glass-glass sc-Si modules
code	50d3cc6b334942a9b6e3f35998c24fb4
comment	Adapted from Müller et al. (2021): A comparative life cycle assessment of silicon PV modules: Impact of module design, manufacturing location and inventory.
location	RoW
reference product	Takeback & recycling of glass-glass sc-Si modules
type	process
unit	kilogram
worksheet name	Renewables_SSP2-NPi_2025
Exchanges
name	amount	database	location	unit	categories	type	reference product
Carbon dioxide, fossil	-0.16	biosphere3		kilogram	air	biosphere
Takeback & recycling of glass-glass sc-Si modules	1	Renewables_SSP2-NPi_2025	RoW	kilogram		production	Takeback & recycling of glass-glass sc-Si modules
diesel, burned in building machine	0.0648	ecoinvent_3.9.1_cutoff_PV_update	GLO	megajoule		technosphere	diesel, burned in building machine
heat production, heavy fuel oil, at industrial furnace 1MW	-0.683	ecoinvent_3.9.1_cutoff_PV_update	RoW	megajoule		technosphere	heat, district or industrial, other than natural gas
market for copper, cathode	-0.00704	ecoinvent_3.9.1_cutoff_PV_update	GLO	kilogram		technosphere	copper, cathode
market for heat, district or industrial, natural gas	-1.05	ecoinvent_3.9.1_cutoff_PV_update	RoW	megajoule		technosphere	heat, district or industrial, natural gas
market for lime, packed	-0.308	ecoinvent_3.9.1_cutoff_PV_update	RoW	kilogram		technosphere	lime, packed
market for silica sand	-0.445	ecoinvent_3.9.1_cutoff_PV_update	GLO	kilogram		technosphere	silica sand
market for soda ash, light	-0.176	ecoinvent_3.9.1_cutoff_PV_update	GLO	kilogram		technosphere	soda ash, light
market group for electricity, medium voltage	0.111	Renewables_SSP2-NPi_2025	PV producing countries except China/Europe	kilowatt hour		technosphere	electricity, medium voltage
transport, freight, lorry 16-32 metric ton, EURO5	0.4	ecoinvent_3.9.1_cutoff_PV_update	RoW	ton kilometer		technosphere	transport, freight, lorry 16-32 metric ton, EURO5
transport, freight, lorry 3.5-7.5 metric ton, EURO5	0.1	ecoinvent_3.9.1_cutoff_PV_update	RoW	ton kilometer		technosphere	transport, freight, lorry 3.5-7.5 metric ton, EURO5
treatment of used cable	0.00704	ecoinvent_3.9.1_cutoff_PV_update	GLO	kilogram		technosphere	copper, cathode
treatment of waste plastic, mixture, municipal incineration	0.111	ecoinvent_3.9.1_cutoff_PV_update	RoW	kilogram		technosphere	waste plastic, mixture
treatment of waste plastic, mixture, sanitary landfill	0.01944	ecoinvent_3.9.1_cutoff_PV_update	RoW	kilogram		technosphere	waste plastic, mixture
Activity	Takeback & recycling of glass-glass sc-Si modules
code	5a1a652c9547412288eb39aae9a9c775
comment	Adapted from Müller et al. (2021): A comparative life cycle assessment of silicon PV modules: Impact of module design, manufacturing location and inventory.
location	CN
reference product	Takeback & recycling of glass-glass sc-Si modules
type	process
unit	kilogram
worksheet name	Renewables_SSP2-NPi_2025
Exchanges
name	amount	database	location	unit	categories	type	reference product
Carbon dioxide, fossil	-0.16	biosphere3		kilogram	air	biosphere
Takeback & recycling of glass-glass sc-Si modules	1	Renewables_SSP2-NPi_2025	CN	kilogram		production	Takeback & recycling of glass-glass sc-Si modules
copper production, cathode, solvent extraction and electrowinning process	-0.00704	ecoinvent_3.9.1_cutoff_PV_update	GLO	kilogram		technosphere	copper, cathode
diesel, burned in building machine	0.0648	ecoinvent_3.9.1_cutoff_PV_update	GLO	megajoule		technosphere	diesel, burned in building machine
heat production, heavy fuel oil, at industrial furnace 1MW	-0.683	ecoinvent_3.9.1_cutoff_PV_update	RoW	megajoule		technosphere	heat, district or industrial, other than natural gas
market for heat, district or industrial, natural gas	-1.05	ecoinvent_3.9.1_cutoff_PV_update	RoW	megajoule		technosphere	heat, district or industrial, natural gas
market for lime, packed	-0.308	ecoinvent_3.9.1_cutoff_PV_update	RoW	kilogram		technosphere	lime, packed
market for silica sand	-0.445	ecoinvent_3.9.1_cutoff_PV_update	GLO	kilogram		technosphere	silica sand
market for soda ash, light	-0.176	ecoinvent_3.9.1_cutoff_PV_update	GLO	kilogram		technosphere	soda ash, light
market group for electricity, medium voltage	0.111	ecoinvent_3.9.1_cutoff_PV_update	CN	kilowatt hour		technosphere	electricity, medium voltage
transport, freight, lorry 16-32 metric ton, EURO5	0.4	ecoinvent_3.9.1_cutoff_PV_update	RoW	ton kilometer		technosphere	transport, freight, lorry 16-32 metric ton, EURO5
transport, freight, lorry 3.5-7.5 metric ton, EURO5	0.1	ecoinvent_3.9.1_cutoff_PV_update	RoW	ton kilometer		technosphere	transport, freight, lorry 3.5-7.5 metric ton, EURO5
treatment of used cable	0.00704	ecoinvent_3.9.1_cutoff_PV_update	GLO	kilogram		technosphere	copper, cathode
treatment of waste plastic, mixture, municipal incineration	0.111	ecoinvent_3.9.1_cutoff_PV_update	RoW	kilogram		technosphere	waste plastic, mixture
treatment of waste plastic, mixture, sanitary landfill	0.01944	ecoinvent_3.9.1_cutoff_PV_update	RoW	kilogram		technosphere	waste plastic, mixture
Activity	Takeback & recycling of glass-glass sc-Si modules
code	9d82fb47df7f4ca6bc9f9e824d205b18
comment	Adapted from Müller et al. (2021): A comparative life cycle assessment of silicon PV modules: Impact of module design, manufacturing location and inventory.
location	GLO
reference product	Takeback & recycling of glass-glass sc-Si modules
type	process
unit	kilogram
worksheet name	Renewables_SSP2-NPi_2025
Exchanges
name	amount	database	location	unit	categories	type	reference product
Carbon dioxide, fossil	-0.16	biosphere3		kilogram	air	biosphere
Takeback & recycling of glass-glass sc-Si modules	1	Renewables_SSP2-NPi_2025	GLO	kilogram		production	Takeback & recycling of glass-glass sc-Si modules
copper production, cathode, solvent extraction and electrowinning process	-0.00704	ecoinvent_3.9.1_cutoff_PV_update	GLO	kilogram		technosphere	copper, cathode
diesel, burned in building machine	0.0648	ecoinvent_3.9.1_cutoff_PV_update	GLO	megajoule		technosphere	diesel, burned in building machine
heat production, heavy fuel oil, at industrial furnace 1MW	-0.683	ecoinvent_3.9.1_cutoff_PV_update	Europe without Switzerland	megajoule		technosphere	heat, district or industrial, other than natural gas
market for heat, district or industrial, natural gas	-1.05	ecoinvent_3.9.1_cutoff_PV_update	Europe without Switzerland	megajoule		technosphere	heat, district or industrial, natural gas
market for lime, packed	-0.308	ecoinvent_3.9.1_cutoff_PV_update	CH	kilogram		technosphere	lime, packed
market for silica sand	-0.445	ecoinvent_3.9.1_cutoff_PV_update	GLO	kilogram		technosphere	silica sand
market for soda ash, light	-0.176	ecoinvent_3.9.1_cutoff_PV_update	GLO	kilogram		technosphere	soda ash, light
market group for electricity, medium voltage	0.111	ecoinvent_3.9.1_cutoff_PV_update	GLO	kilowatt hour		technosphere	electricity, medium voltage
transport, freight, lorry 16-32 metric ton, EURO5	0.4	ecoinvent_3.9.1_cutoff_PV_update	RER	ton kilometer		technosphere	transport, freight, lorry 16-32 metric ton, EURO5
transport, freight, lorry 3.5-7.5 metric ton, EURO5	0.1	ecoinvent_3.9.1_cutoff_PV_update	RER	ton kilometer		technosphere	transport, freight, lorry 3.5-7.5 metric ton, EURO5
treatment of used cable	0.00704	ecoinvent_3.9.1_cutoff_PV_update	GLO	kilogram		technosphere	copper, cathode
treatment of waste plastic, mixture, municipal incineration	0.111	ecoinvent_3.9.1_cutoff_PV_update	RoW	kilogram		technosphere	waste plastic, mixture
treatment of waste plastic, mixture, sanitary landfill	0.01944	ecoinvent_3.9.1_cutoff_PV_update	RoW	kilogram		technosphere	waste plastic, mixture
Activity	Takeback & recycling of glass-glass sc-Si modules
code	eb5c62a6131842efa507b61afd49db40
comment	Adapted from Müller et al. (2021): A comparative life cycle assessment of silicon PV modules: Impact of module design, manufacturing location and inventory.
location	RER
reference product	Takeback & recycling of glass-glass sc-Si modules
type	process
unit	kilogram
worksheet name	Renewables_SSP2-NPi_2025
Exchanges
name	amount	database	location	unit	categories	type	reference product
Carbon dioxide, fossil	-0.16	biosphere3		kilogram	air	biosphere
Takeback & recycling of glass-glass sc-Si modules	1	Renewables_SSP2-NPi_2025	RER	kilogram		production	Takeback & recycling of glass-glass sc-Si modules
market for copper, cathode	-0.00704	ecoinvent_3.9.1_cutoff_PV_update	GLO	kilogram		technosphere	copper, cathode
market for diesel, burned in building machine	0.0648	ecoinvent_3.9.1_cutoff_PV_update	GLO	megajoule		technosphere	diesel, burned in building machine
market for lime, packed	-0.308	ecoinvent_3.9.1_cutoff_PV_update	Europe without Switzerland	kilogram		technosphere	lime, packed
market group for electricity, medium voltage	0.111	ecoinvent_3.9.1_cutoff_PV_update	RER	kilowatt hour		technosphere	electricity, medium voltage
market group for heat, district or industrial, natural gas	-1.05	ecoinvent_3.9.1_cutoff_PV_update	RER	megajoule		technosphere	heat, district or industrial, natural gas
market group for heat, district or industrial, other than natural gas	-0.683	ecoinvent_3.9.1_cutoff_PV_update	RER	megajoule		technosphere	heat, district or industrial, other than natural gas
silica sand production	-0.445	ecoinvent_3.9.1_cutoff_PV_update	DE	kilogram		technosphere	silica sand
soda production, solvay process	-0.176	ecoinvent_3.9.1_cutoff_PV_update	RER	kilogram		technosphere	soda ash, light
transport, freight, lorry 16-32 metric ton, EURO5	0.4	ecoinvent_3.9.1_cutoff_PV_update	RER	ton kilometer		technosphere	transport, freight, lorry 16-32 metric ton, EURO5
transport, freight, lorry 3.5-7.5 metric ton, EURO5	0.1	ecoinvent_3.9.1_cutoff_PV_update	RER	ton kilometer		technosphere	transport, freight, lorry 3.5-7.5 metric ton, EURO5
treatment of used cable	0.00704	ecoinvent_3.9.1_cutoff_PV_update	GLO	kilogram		technosphere	copper, cathode
treatment of waste plastic, mixture, municipal incineration	0.111	ecoinvent_3.9.1_cutoff_PV_update	RoW	kilogram		technosphere	waste plastic, mixture
treatment of waste plastic, mixture, sanitary landfill	0.01944	ecoinvent_3.9.1_cutoff_PV_update	RoW	kilogram		technosphere	waste plastic, mixture
Activity	glass-backsheet module production
code	1724e5cda69c436e8c3a035a8ac38075
comment	Adapted from Müller et al. (2021): A comparative life cycle assessment of silicon PV modules: Impact of module design, manufacturing location and inventory.
location	CN
reference product	photovoltaic panel, single-Si, glass-backsheet
type	process
unit	square meter
worksheet name	Renewables_SSP2-NPi_2025
Exchanges
name	amount	database	location	unit	categories	type	reference product
Carbon dioxide, fossil	0.0218	biosphere3		kilogram	air	biosphere
Heat, waste	13.4	biosphere3		megajoule	air	biosphere
NMVOC, non-methane volatile organic compounds	0.00806	biosphere3		kilogram	air	biosphere
Water	0.0279	biosphere3		cubic meter	air	biosphere
Water, cooling, unspecified natural origin	0.0716	biosphere3		cubic meter	natural resource::in water	biosphere
glass-backsheet module production	1	Renewables_SSP2-NPi_2025	CN	square meter		production	photovoltaic panel, single-Si, glass-backsheet
PERC cell production	0.898	Renewables_SSP2-NPi_2025	CN	square meter		technosphere	photovoltaic cell, single-Si wafer
market for 1-propanol	0.0172	ecoinvent_3.9.1_cutoff_PV_update	GLO	kilogram		technosphere	1-propanol
market for EUR-flat pallet	0.05	ecoinvent_3.9.1_cutoff_PV_update	RoW	unit		technosphere	EUR-flat pallet
market for adipic acid	0.000369	ecoinvent_3.9.1_cutoff_PV_update	GLO	kilogram		technosphere	adipic acid
market for aluminium alloy, AlMg3	1.51	ecoinvent_3.9.1_cutoff_PV_update	GLO	kilogram		technosphere	aluminium alloy, AlMg3
market for copper, cathode	0.148	ecoinvent_3.9.1_cutoff_PV_update	GLO	kilogram		technosphere	copper, cathode
market for corrugated board box	0.763	ecoinvent_3.9.1_cutoff_PV_update	RoW	kilogram		technosphere	corrugated board box
market for diode, auxilliaries and energy use	0.00281	ecoinvent_3.9.1_cutoff_PV_update	GLO	kilogram		technosphere	diode, auxilliaries and energy use
market for ethylvinylacetate, foil	0.793	ecoinvent_3.9.1_cutoff_PV_update	GLO	kilogram		technosphere	ethylvinylacetate, foil
market for extrusion, plastic film	0.336	ecoinvent_3.9.1_cutoff_PV_update	GLO	kilogram		technosphere	extrusion, plastic film
market for glass fibre reinforced plastic, polyamide, injection moulded	0.188	ecoinvent_3.9.1_cutoff_PV_update	GLO	kilogram		technosphere	glass fibre reinforced plastic, polyamide, injection moulded
market for lead	0.0108	ecoinvent_3.9.1_cutoff_PV_update	GLO	kilogram		technosphere	lead
market for lubricating oil	0.00161	ecoinvent_3.9.1_cutoff_PV_update	RoW	kilogram		technosphere	lubricating oil
market for municipal solid waste	0.0969	ecoinvent_3.9.1_cutoff_PV_update	RoW	kilogram		technosphere	municipal solid waste
market for packaging film, low density polyethylene	0.0401	ecoinvent_3.9.1_cutoff_PV_update	GLO	kilogram		technosphere	packaging film, low density polyethylene
market for photovoltaic panel factory	4e-06	ecoinvent_3.9.1_cutoff_PV_update	GLO	unit		technosphere	photovoltaic panel factory
market for polyethylene terephthalate, granulate, amorphous	0.281	ecoinvent_3.9.1_cutoff_PV_update	GLO	kilogram		technosphere	polyethylene terephthalate, granulate, amorphous
market for polyethylene, high density, granulate	0.0242	ecoinvent_3.9.1_cutoff_PV_update	GLO	kilogram		technosphere	polyethylene, high density, granulate
market for polyethylene, low density, granulate	0.0548	ecoinvent_3.9.1_cutoff_PV_update	GLO	kilogram		technosphere	polyethylene, low density, granulate
market for polyvinylfluoride, film	0.0451	ecoinvent_3.9.1_cutoff_PV_update	GLO	kilogram		technosphere	polyvinylfluoride, film
market for silicone product	0.144	ecoinvent_3.9.1_cutoff_PV_update	RoW	kilogram		technosphere	silicone product
market for solar glass, low-iron	8	ecoinvent_3.9.1_cutoff_PV_update	GLO	kilogram		technosphere	solar glass, low-iron
market for tempering, flat glass	8	ecoinvent_3.9.1_cutoff_PV_update	GLO	kilogram		technosphere	tempering, flat glass
market for tin	0.0104	ecoinvent_3.9.1_cutoff_PV_update	GLO	kilogram		technosphere	tin
market for waste mineral oil	0.00161	ecoinvent_3.9.1_cutoff_PV_update	RoW	kilogram		technosphere	waste mineral oil
market for waste plastic, mixture	0.0248	ecoinvent_3.9.1_cutoff_PV_update	RoW	kilogram		technosphere	waste plastic, mixture
market for waste polyvinylfluoride	0.000902	ecoinvent_3.9.1_cutoff_PV_update	RoW	kilogram		technosphere	waste polyvinylfluoride
market for wire drawing, copper	0.148	ecoinvent_3.9.1_cutoff_PV_update	GLO	kilogram		technosphere	wire drawing, copper
market group for electricity, medium voltage	3.32	ecoinvent_3.9.1_cutoff_PV_update	CN	kilowatt hour		technosphere	electricity, medium voltage
Activity	glass-backsheet module production
code	1c7153d8533b40bfb1dc5939e1c8da9b
comment	Adapted from Müller et al. (2021): A comparative life cycle assessment of silicon PV modules: Impact of module design, manufacturing location and inventory.
location	GLO
reference product	photovoltaic panel, single-Si, glass-backsheet
type	process
unit	square meter
worksheet name	Renewables_SSP2-NPi_2025
Exchanges
name	amount	database	location	unit	categories	type	reference product
Carbon dioxide, fossil	0.0218	biosphere3		kilogram	air	biosphere
Heat, waste	13.4	biosphere3		megajoule	air	biosphere
NMVOC, non-methane volatile organic compounds	0.00806	biosphere3		kilogram	air	biosphere
Water	0.0279	biosphere3		cubic meter	air	biosphere
Water, cooling, unspecified natural origin	0.0716	biosphere3		cubic meter	natural resource::in water	biosphere
glass-backsheet module production	1	Renewables_SSP2-NPi_2025	GLO	square meter		production	photovoltaic panel, single-Si, glass-backsheet
EUR-flat pallet production	0.05	ecoinvent_3.9.1_cutoff_PV_update	RoW	unit		technosphere	EUR-flat pallet
PERC cell production	0.898	Renewables_SSP2-NPi_2025	CN	square meter		technosphere	photovoltaic cell, single-Si wafer
aluminium alloy production, AlMg3	1.51	ecoinvent_3.9.1_cutoff_PV_update	RER	kilogram		technosphere	aluminium alloy, AlMg3
market for 1-propanol	0.0172	ecoinvent_3.9.1_cutoff_PV_update	GLO	kilogram		technosphere	1-propanol
market for adipic acid	0.000369	ecoinvent_3.9.1_cutoff_PV_update	GLO	kilogram		technosphere	adipic acid
market for copper, cathode	0.148	ecoinvent_3.9.1_cutoff_PV_update	GLO	kilogram		technosphere	copper, cathode
market for corrugated board box	0.763	ecoinvent_3.9.1_cutoff_PV_update	RoW	kilogram		technosphere	corrugated board box
market for diode, auxilliaries and energy use	0.00281	ecoinvent_3.9.1_cutoff_PV_update	GLO	kilogram		technosphere	diode, auxilliaries and energy use
market for ethylvinylacetate, foil	0.793	ecoinvent_3.9.1_cutoff_PV_update	GLO	kilogram		technosphere	ethylvinylacetate, foil
market for extrusion, plastic film	0.336	ecoinvent_3.9.1_cutoff_PV_update	GLO	kilogram		technosphere	extrusion, plastic film
market for glass fibre reinforced plastic, polyamide, injection moulded	0.188	ecoinvent_3.9.1_cutoff_PV_update	GLO	kilogram		technosphere	glass fibre reinforced plastic, polyamide, injection moulded
market for lead	0.0108	ecoinvent_3.9.1_cutoff_PV_update	GLO	kilogram		technosphere	lead
market for lubricating oil	0.00161	ecoinvent_3.9.1_cutoff_PV_update	RoW	kilogram		technosphere	lubricating oil
market for packaging film, low density polyethylene	0.0401	ecoinvent_3.9.1_cutoff_PV_update	GLO	kilogram		technosphere	packaging film, low density polyethylene
market for photovoltaic panel factory	4e-06	ecoinvent_3.9.1_cutoff_PV_update	GLO	unit		technosphere	photovoltaic panel factory
market for polyethylene terephthalate, granulate, amorphous	0.281	ecoinvent_3.9.1_cutoff_PV_update	GLO	kilogram		technosphere	polyethylene terephthalate, granulate, amorphous
market for polyethylene, high density, granulate	0.0242	ecoinvent_3.9.1_cutoff_PV_update	GLO	kilogram		technosphere	polyethylene, high density, granulate
market for polyethylene, low density, granulate	0.0548	ecoinvent_3.9.1_cutoff_PV_update	GLO	kilogram		technosphere	polyethylene, low density, granulate
market for polyvinylfluoride, film	0.0451	ecoinvent_3.9.1_cutoff_PV_update	GLO	kilogram		technosphere	polyvinylfluoride, film
market for silicone product	0.144	ecoinvent_3.9.1_cutoff_PV_update	RoW	kilogram		technosphere	silicone product
market for solar glass, low-iron	8	ecoinvent_3.9.1_cutoff_PV_update	GLO	kilogram		technosphere	solar glass, low-iron
market for tempering, flat glass	8	ecoinvent_3.9.1_cutoff_PV_update	GLO	kilogram		technosphere	tempering, flat glass
market for tin	0.0104	ecoinvent_3.9.1_cutoff_PV_update	GLO	kilogram		technosphere	tin
market for waste mineral oil	0.00161	ecoinvent_3.9.1_cutoff_PV_update	RoW	kilogram		technosphere	waste mineral oil
market for waste plastic, mixture	0.0248	ecoinvent_3.9.1_cutoff_PV_update	RoW	kilogram		technosphere	waste plastic, mixture
market for waste polyvinylfluoride	0.000902	ecoinvent_3.9.1_cutoff_PV_update	RoW	kilogram		technosphere	waste polyvinylfluoride
market for wire drawing, copper	0.148	ecoinvent_3.9.1_cutoff_PV_update	GLO	kilogram		technosphere	wire drawing, copper
market group for electricity, medium voltage	3.32	ecoinvent_3.9.1_cutoff_PV_update	GLO	kilowatt hour		technosphere	electricity, medium voltage
market group for municipal solid waste	0.0969	ecoinvent_3.9.1_cutoff_PV_update	RER	kilogram		technosphere	municipal solid waste
Activity	glass-backsheet module production
code	22df19931c0b4cd39a0eb6a0952ff177
comment	Adapted from Müller et al. (2021): A comparative life cycle assessment of silicon PV modules: Impact of module design, manufacturing location and inventory.
location	RER
reference product	photovoltaic panel, single-Si, glass-backsheet
type	process
unit	square meter
worksheet name	Renewables_SSP2-NPi_2025
Exchanges
name	amount	database	location	unit	categories	type	reference product
Carbon dioxide, fossil	0.0218	biosphere3		kilogram	air	biosphere
Heat, waste	13.4	biosphere3		megajoule	air	biosphere
NMVOC, non-methane volatile organic compounds	0.00806	biosphere3		kilogram	air	biosphere
Water	0.0279	biosphere3		cubic meter	air	biosphere
Water, cooling, unspecified natural origin	0.0716	biosphere3		cubic meter	natural resource::in water	biosphere
glass-backsheet module production	1	Renewables_SSP2-NPi_2025	RER	square meter		production	photovoltaic panel, single-Si, glass-backsheet
1-propanol production	0.0172	ecoinvent_3.9.1_cutoff_PV_update	RER	kilogram		technosphere	1-propanol
PERC cell production	0.898	Renewables_SSP2-NPi_2025	RER	square meter		technosphere	photovoltaic cell, single-Si wafer
adipic acid production	0.000369	ecoinvent_3.9.1_cutoff_PV_update	RER	kilogram		technosphere	adipic acid
aluminium alloy production, AlMg3	1.51	ecoinvent_3.9.1_cutoff_PV_update	RER	kilogram		technosphere	aluminium alloy, AlMg3
ethylvinylacetate production, foil	0.793	ecoinvent_3.9.1_cutoff_PV_update	RER	kilogram		technosphere	ethylvinylacetate, foil
extrusion, plastic film	0.336	ecoinvent_3.9.1_cutoff_PV_update	RER	kilogram		technosphere	extrusion, plastic film
glass fibre reinforced plastic production, polyamide, injection moulded	0.188	ecoinvent_3.9.1_cutoff_PV_update	RER	kilogram		technosphere	glass fibre reinforced plastic, polyamide, injection moulded
market for EUR-flat pallet	0.05	ecoinvent_3.9.1_cutoff_PV_update	RER	unit		technosphere	EUR-flat pallet
market for copper, cathode	0.148	ecoinvent_3.9.1_cutoff_PV_update	GLO	kilogram		technosphere	copper, cathode
market for corrugated board box	0.763	ecoinvent_3.9.1_cutoff_PV_update	RER	kilogram		technosphere	corrugated board box
market for diode, auxilliaries and energy use	0.00281	ecoinvent_3.9.1_cutoff_PV_update	GLO	kilogram		technosphere	diode, auxilliaries and energy use
market for lead	0.0108	ecoinvent_3.9.1_cutoff_PV_update	GLO	kilogram		technosphere	lead
market for lubricating oil	0.00161	ecoinvent_3.9.1_cutoff_PV_update	RER	kilogram		technosphere	lubricating oil
market for photovoltaic panel factory	4e-06	ecoinvent_3.9.1_cutoff_PV_update	GLO	unit		technosphere	photovoltaic panel factory
market for polyvinylfluoride, film	0.0451	ecoinvent_3.9.1_cutoff_PV_update	GLO	kilogram		technosphere	polyvinylfluoride, film
market for silicone product	0.144	ecoinvent_3.9.1_cutoff_PV_update	RER	kilogram		technosphere	silicone product
market for tin	0.0104	ecoinvent_3.9.1_cutoff_PV_update	GLO	kilogram		technosphere	tin
market for waste mineral oil	0.00161	ecoinvent_3.9.1_cutoff_PV_update	Europe without Switzerland	kilogram		technosphere	waste mineral oil
market for waste polyvinylfluoride	0.000902	ecoinvent_3.9.1_cutoff_PV_update	RoW	kilogram		technosphere	waste polyvinylfluoride
market group for electricity, medium voltage	3.32	ecoinvent_3.9.1_cutoff_PV_update	RER	kilowatt hour		technosphere	electricity, medium voltage
market group for municipal solid waste	0.0969	ecoinvent_3.9.1_cutoff_PV_update	RER	kilogram		technosphere	municipal solid waste
market group for waste plastic, mixture	0.0248	ecoinvent_3.9.1_cutoff_PV_update	RER	kilogram		technosphere	waste plastic, mixture
packaging film production, low density polyethylene	0.0401	ecoinvent_3.9.1_cutoff_PV_update	RER	kilogram		technosphere	packaging film, low density polyethylene
polyethylene production, high density, granulate	0.0242	ecoinvent_3.9.1_cutoff_PV_update	RER	kilogram		technosphere	polyethylene, high density, granulate
polyethylene production, low density, granulate	0.0548	ecoinvent_3.9.1_cutoff_PV_update	RER	kilogram		technosphere	polyethylene, low density, granulate
polyethylene terephthalate production, granulate, amorphous	0.281	ecoinvent_3.9.1_cutoff_PV_update	RER	kilogram		technosphere	polyethylene terephthalate, granulate, amorphous
solar glass production, low-iron	8	ecoinvent_3.9.1_cutoff_PV_update	RER	kilogram		technosphere	solar glass, low-iron
tempering, flat glass	8	ecoinvent_3.9.1_cutoff_PV_update	RER	kilogram		technosphere	tempering, flat glass
wire drawing, copper	0.148	ecoinvent_3.9.1_cutoff_PV_update	RER	kilogram		technosphere	wire drawing, copper
Activity	glass-backsheet module production
code	a33781f3fe8046ddaac556722ebbc006
comment	Adapted from Müller et al. (2021): A comparative life cycle assessment of silicon PV modules: Impact of module design, manufacturing location and inventory.
location	RoW
reference product	photovoltaic panel, single-Si, glass-backsheet
type	process
unit	square meter
worksheet name	Renewables_SSP2-NPi_2025
Exchanges
name	amount	database	location	unit	categories	type	reference product
Carbon dioxide, fossil	0.0218	biosphere3		kilogram	air	biosphere
Heat, waste	13.4	biosphere3		megajoule	air	biosphere
NMVOC, non-methane volatile organic compounds	0.00806	biosphere3		kilogram	air	biosphere
Water	0.0279	biosphere3		cubic meter	air	biosphere
Water, cooling, unspecified natural origin	0.0716	biosphere3		cubic meter	natural resource::in water	biosphere
glass-backsheet module production	1	Renewables_SSP2-NPi_2025	RoW	square meter		production	photovoltaic panel, single-Si, glass-backsheet
PERC cell production	0.898	Renewables_SSP2-NPi_2025	RoW	square meter		technosphere	photovoltaic cell, single-Si wafer
market for 1-propanol	0.0172	ecoinvent_3.9.1_cutoff_PV_update	GLO	kilogram		technosphere	1-propanol
market for EUR-flat pallet	0.05	ecoinvent_3.9.1_cutoff_PV_update	RoW	unit		technosphere	EUR-flat pallet
market for adipic acid	0.000369	ecoinvent_3.9.1_cutoff_PV_update	GLO	kilogram		technosphere	adipic acid
market for aluminium alloy, AlMg3	1.51	ecoinvent_3.9.1_cutoff_PV_update	GLO	kilogram		technosphere	aluminium alloy, AlMg3
market for copper, cathode	0.148	ecoinvent_3.9.1_cutoff_PV_update	GLO	kilogram		technosphere	copper, cathode
market for corrugated board box	0.763	ecoinvent_3.9.1_cutoff_PV_update	RoW	kilogram		technosphere	corrugated board box
market for diode, auxilliaries and energy use	0.00281	ecoinvent_3.9.1_cutoff_PV_update	GLO	kilogram		technosphere	diode, auxilliaries and energy use
market for ethylvinylacetate, foil	0.793	ecoinvent_3.9.1_cutoff_PV_update	GLO	kilogram		technosphere	ethylvinylacetate, foil
market for extrusion, plastic film	0.336	ecoinvent_3.9.1_cutoff_PV_update	GLO	kilogram		technosphere	extrusion, plastic film
market for glass fibre reinforced plastic, polyamide, injection moulded	0.188	ecoinvent_3.9.1_cutoff_PV_update	GLO	kilogram		technosphere	glass fibre reinforced plastic, polyamide, injection moulded
market for lead	0.0108	ecoinvent_3.9.1_cutoff_PV_update	GLO	kilogram		technosphere	lead
market for lubricating oil	0.00161	ecoinvent_3.9.1_cutoff_PV_update	RoW	kilogram		technosphere	lubricating oil
market for municipal solid waste	0.0969	ecoinvent_3.9.1_cutoff_PV_update	RoW	kilogram		technosphere	municipal solid waste
market for packaging film, low density polyethylene	0.0401	ecoinvent_3.9.1_cutoff_PV_update	GLO	kilogram		technosphere	packaging film, low density polyethylene
market for photovoltaic panel factory	4e-06	ecoinvent_3.9.1_cutoff_PV_update	GLO	unit		technosphere	photovoltaic panel factory
market for polyethylene terephthalate, granulate, amorphous	0.281	ecoinvent_3.9.1_cutoff_PV_update	GLO	kilogram		technosphere	polyethylene terephthalate, granulate, amorphous
market for polyethylene, high density, granulate	0.0242	ecoinvent_3.9.1_cutoff_PV_update	GLO	kilogram		technosphere	polyethylene, high density, granulate
market for polyethylene, low density, granulate	0.0548	ecoinvent_3.9.1_cutoff_PV_update	GLO	kilogram		technosphere	polyethylene, low density, granulate
market for silicone product	0.144	ecoinvent_3.9.1_cutoff_PV_update	RoW	kilogram		technosphere	silicone product
market for waste mineral oil	0.00161	ecoinvent_3.9.1_cutoff_PV_update	RoW	kilogram		technosphere	waste mineral oil
market for waste plastic, mixture	0.0248	ecoinvent_3.9.1_cutoff_PV_update	RoW	kilogram		technosphere	waste plastic, mixture
market for waste polyvinylfluoride	0.000902	ecoinvent_3.9.1_cutoff_PV_update	RoW	kilogram		technosphere	waste polyvinylfluoride
market group for electricity, medium voltage	3.32	Renewables_SSP2-NPi_2025	PV producing countries except China/Europe	kilowatt hour		technosphere	electricity, medium voltage
polyvinylfluoride, film production	0.0451	ecoinvent_3.9.1_cutoff_PV_update	RoW	kilogram		technosphere	polyvinylfluoride, film
solar glass production, low-iron	8	ecoinvent_3.9.1_cutoff_PV_update	RoW	kilogram		technosphere	solar glass, low-iron
tempering, flat glass	8	ecoinvent_3.9.1_cutoff_PV_update	RoW	kilogram		technosphere	tempering, flat glass
tin production	0.0104	ecoinvent_3.9.1_cutoff_PV_update	RoW	kilogram		technosphere	tin
wire drawing, copper	0.148	ecoinvent_3.9.1_cutoff_PV_update	RoW	kilogram		technosphere	wire drawing, copper
Activity	market for photovoltaic panel, single-Si wafer, glass-backsheet
code	6e0b7a0wce29459fg424557e737a57vg
comment	Global average PV module production. Source: https://www.statista.com/statistics/668749/regional-distribution-of-solar-pv-module-manufacturing/ Year: 2022 Weight: 1.51 kg/m2
location	RER
reference product	photovoltaic panel, single-Si wafer, glass-backsheet
type	process
unit	square meter
Exchanges
name	amount	database	location	unit	type	reference product
market for photovoltaic panel, single-Si wafer, glass-backsheet	1	Renewables_SSP2-NPi_2025	RER	square meter	production	photovoltaic panel, single-Si wafer, glass-backsheet
glass-backsheet module production	1	Renewables_SSP2-NPi_2025	RER	square meter	technosphere	photovoltaic panel, single-Si, glass-backsheet
transport, photovoltaic modules, intra-Europe	1.51	Renewables_SSP2-NPi_2025	GLO	kilogram	technosphere	transport, intra-Europe
Activity	market for photovoltaic panel, single-Si wafer, glass-backsheet
code	6e0b7a0cce29457cb424557e737a5b6d
comment	Global average PV module production. Source: https://www.statista.com/statistics/668749/regional-distribution-of-solar-pv-module-manufacturing/ Year: 2022 Weight: 1.51 kg/m2
location	GLO
reference product	photovoltaic panel, single-Si wafer, glass-backsheet
type	process
unit	square meter
Exchanges
name	amount	database	location	unit	type	reference product
market for photovoltaic panel, single-Si wafer, glass-backsheet	1	Renewables_SSP2-NPi_2025	GLO	square meter	production	photovoltaic panel, single-Si wafer, glass-backsheet
glass-backsheet module production	0.778	Renewables_SSP2-NPi_2025	CN	square meter	technosphere	photovoltaic panel, single-Si, glass-backsheet
glass-backsheet module production	0.162	Renewables_SSP2-NPi_2025	RoW	square meter	technosphere	photovoltaic panel, single-Si, glass-backsheet
glass-backsheet module production	0.06	Renewables_SSP2-NPi_2025	RER	square meter	technosphere	photovoltaic panel, single-Si, glass-backsheet
transport, photovoltaic modules, global estimate	1.51	Renewables_SSP2-NPi_2025	GLO	kilogram	technosphere	transport, global estimate
Activity	market group for electricity, medium voltage
code	6bc0a2fb105647c1a67e580a665adef1
comment	This market represents the electricity share of regions/countries except China and Europe that produce photovoltaic modules. Year: 2022 Source: https://www.statista.com/statistics/668749/regional-distribution-of-solar-pv-module-manufacturing/
location	PV producing countries except China/Europe
reference product	electricity, medium voltage
type	process
unit	kilowatt hour
Exchanges
name	amount	database	location	unit	type	reference product
market group for electricity, medium voltage	1	Renewables_SSP2-NPi_2025	PV producing countries except China/Europe	kilowatt hour	production	electricity, medium voltage
market for electricity, medium voltage	0.296	ecoinvent_3.9.1_cutoff_PV_update	VN	kilowatt hour	technosphere	electricity, medium voltage
market for electricity, medium voltage	0.13	ecoinvent_3.9.1_cutoff_PV_update	MY	kilowatt hour	technosphere	electricity, medium voltage
market for electricity, medium voltage	0.088	ecoinvent_3.9.1_cutoff_PV_update	KR	kilowatt hour	technosphere	electricity, medium voltage
market for electricity, medium voltage	0.056	ecoinvent_3.9.1_cutoff_PV_update	TH	kilowatt hour	technosphere	electricity, medium voltage
market for electricity, medium voltage	0.023	ecoinvent_3.9.1_cutoff_PV_update	TW	kilowatt hour	technosphere	electricity, medium voltage
market for electricity, medium voltage	0.014	ecoinvent_3.9.1_cutoff_PV_update	SG	kilowatt hour	technosphere	electricity, medium voltage
market for electricity, medium voltage	0.005	ecoinvent_3.9.1_cutoff_PV_update	JP	kilowatt hour	technosphere	electricity, medium voltage
market group for electricity, medium voltage	0.088	ecoinvent_3.9.1_cutoff_PV_update	IN	kilowatt hour	technosphere	electricity, medium voltage
market group for electricity, medium voltage	0.088	ecoinvent_3.9.1_cutoff_PV_update	US	kilowatt hour	technosphere	electricity, medium voltage
market group for electricity, medium voltage	0.019	ecoinvent_3.9.1_cutoff_PV_update	CA	kilowatt hour	technosphere	electricity, medium voltage
market group for electricity, medium voltage	0.194	ecoinvent_3.9.1_cutoff_PV_update	GLO	kilowatt hour	technosphere	electricity, medium voltage
Activity	metallization paste production, back side
code	3b75ca17916b45bf9bc70b13cd651316
comment	Adapted from Müller et al. (2021): A comparative life cycle assessment of silicon PV modules: Impact of module design, manufacturing location and inventory.
location	CN
reference product	metallization paste, back side
type	process
unit	kilogram
worksheet name	Renewables_SSP2-NPi_2025
Exchanges
name	amount	database	location	unit	type	reference product
metallization paste production, back side	1	Renewables_SSP2-NPi_2025	CN	kilogram	production	metallization paste, back side
market for chemical, organic	0.5	ecoinvent_3.9.1_cutoff_PV_update	GLO	kilogram	technosphere	chemical, organic
market for heat, district or industrial, natural gas	0.745	ecoinvent_3.9.1_cutoff_PV_update	RoW	megajoule	technosphere	heat, district or industrial, natural gas
market for silver	0.5	ecoinvent_3.9.1_cutoff_PV_update	GLO	kilogram	technosphere	silver
market for solder factory	2e-10	ecoinvent_3.9.1_cutoff_PV_update	GLO	unit	technosphere	solder factory
market group for electricity, medium voltage	0.25	ecoinvent_3.9.1_cutoff_PV_update	CN	kilowatt hour	technosphere	electricity, medium voltage
Activity	metallization paste production, back side
code	820b3a15442a4e878d7f56b2112fba6e
comment	Adapted from Müller et al. (2021): A comparative life cycle assessment of silicon PV modules: Impact of module design, manufacturing location and inventory.
location	RoW
reference product	metallization paste, back side
type	process
unit	kilogram
worksheet name	Renewables_SSP2-NPi_2025
Exchanges
name	amount	database	location	unit	type	reference product
metallization paste production, back side	1	Renewables_SSP2-NPi_2025	RoW	kilogram	production	metallization paste, back side
market for chemical, organic	0.5	ecoinvent_3.9.1_cutoff_PV_update	GLO	kilogram	technosphere	chemical, organic
market for heat, district or industrial, natural gas	0.745	ecoinvent_3.9.1_cutoff_PV_update	RoW	megajoule	technosphere	heat, district or industrial, natural gas
market for silver	0.5	ecoinvent_3.9.1_cutoff_PV_update	GLO	kilogram	technosphere	silver
market for solder factory	2e-10	ecoinvent_3.9.1_cutoff_PV_update	GLO	unit	technosphere	solder factory
market group for electricity, medium voltage	0.25	Renewables_SSP2-NPi_2025	PV producing countries except China/Europe	kilowatt hour	technosphere	electricity, medium voltage
Activity	metallization paste production, back side
code	bb649f1e56044f8ebcd6928db5a3d739
comment	Adapted from Müller et al. (2021): A comparative life cycle assessment of silicon PV modules: Impact of module design, manufacturing location and inventory.
location	RER
reference product	metallization paste, back side
type	process
unit	kilogram
worksheet name	Renewables_SSP2-NPi_2025
Exchanges
name	amount	database	location	unit	type	reference product
metallization paste production, back side	1	Renewables_SSP2-NPi_2025	RER	kilogram	production	metallization paste, back side
market for chemical, organic	0.5	ecoinvent_3.9.1_cutoff_PV_update	GLO	kilogram	technosphere	chemical, organic
market for silver	0.5	ecoinvent_3.9.1_cutoff_PV_update	GLO	kilogram	technosphere	silver
market group for electricity, medium voltage	0.25	ecoinvent_3.9.1_cutoff_PV_update	RER	kilowatt hour	technosphere	electricity, medium voltage
market group for heat, district or industrial, natural gas	0.745	ecoinvent_3.9.1_cutoff_PV_update	RER	megajoule	technosphere	heat, district or industrial, natural gas
solder factory construction	2e-10	ecoinvent_3.9.1_cutoff_PV_update	RER	unit	technosphere	solder factory
Activity	metallization paste production, back side
code	d34ce4f94d7f42e4b3108e9815ea1639
comment	Adapted from Müller et al. (2021): A comparative life cycle assessment of silicon PV modules: Impact of module design, manufacturing location and inventory.
location	GLO
reference product	metallization paste, back side
type	process
unit	kilogram
worksheet name	Renewables_SSP2-NPi_2025
Exchanges
name	amount	database	location	unit	type	reference product
metallization paste production, back side	1	Renewables_SSP2-NPi_2025	GLO	kilogram	production	metallization paste, back side
market for chemical, organic	0.5	ecoinvent_3.9.1_cutoff_PV_update	GLO	kilogram	technosphere	chemical, organic
market for silver	0.5	ecoinvent_3.9.1_cutoff_PV_update	GLO	kilogram	technosphere	silver
market group for electricity, medium voltage	0.25	ecoinvent_3.9.1_cutoff_PV_update	GLO	kilowatt hour	technosphere	electricity, medium voltage
market group for heat, district or industrial, natural gas	0.745	ecoinvent_3.9.1_cutoff_PV_update	GLO	megajoule	technosphere	heat, district or industrial, natural gas
solder factory construction	2e-10	ecoinvent_3.9.1_cutoff_PV_update	RER	unit	technosphere	solder factory
Activity	methyl aluminium sesquichloride production
code	4d08e47157a842d5a1fec92f01962054
comment	Adapted from Müller et al. (2021): A comparative life cycle assessment of silicon PV modules: Impact of module design, manufacturing location and inventory.
location	GLO
reference product	methyl aluminium sesquichloride
type	process
unit	kilogram
worksheet name	Renewables_SSP2-NPi_2025
Exchanges
name	amount	database	location	unit	categories	type	reference product
Chlorine	0.023	biosphere3		kilogram	air::urban air close to ground	biosphere
Methane, non-fossil	0.023	biosphere3		kilogram	air::urban air close to ground	biosphere
methyl aluminium sesquichloride production	1	Renewables_SSP2-NPi_2025	GLO	kilogram		production	methyl aluminium sesquichloride
market for aluminium chloride	0.0162	ecoinvent_3.9.1_cutoff_PV_update	GLO	kilogram		technosphere	aluminium chloride
market for aluminium, wrought alloy	0.262	ecoinvent_3.9.1_cutoff_PV_update	GLO	kilogram		technosphere	aluminium, wrought alloy
market for methylchloride	0.737	ecoinvent_3.9.1_cutoff_PV_update	RoW	kilogram		technosphere	methylchloride
market group for electricity, medium voltage	0.00258	ecoinvent_3.9.1_cutoff_PV_update	GLO	kilowatt hour		technosphere	electricity, medium voltage
Activity	poly-silicon production
code	3c14e669ed5441e392d457439a6a3c38
comment	Adapted from Müller et al. (2021): A comparative life cycle assessment of silicon PV modules: Impact of module design, manufacturing location and inventory.
location	RER
reference product	silicon, poly-silicon
type	process
unit	kilogram
worksheet name	Renewables_SSP2-NPi_2025
Exchanges
name	amount	database	location	unit	categories	type	reference product
AOX, Adsorbable Organic Halogen	1.26e-05	biosphere3		kilogram	water::surface water	biosphere
BOD5, Biological Oxygen Demand	0.000205	biosphere3		kilogram	water::surface water	biosphere
COD, Chemical Oxygen Demand	0.00202	biosphere3		kilogram	water::surface water	biosphere
Chloride	0.036	biosphere3		kilogram	water::surface water	biosphere
Copper ion	1.02e-07	biosphere3		kilogram	water::surface water	biosphere
DOC, Dissolved Organic Carbon	0.00091	biosphere3		kilogram	water::surface water	biosphere
Iron ion	5.61e-06	biosphere3		kilogram	water::surface water	biosphere
Nitrogen	0.000208	biosphere3		kilogram	water::surface water	biosphere
Phosphate	2.8e-06	biosphere3		kilogram	water::surface water	biosphere
Sodium I	0.0338	biosphere3		kilogram	water::surface water	biosphere
TOC, Total Organic Carbon	0.00091	biosphere3		kilogram	water::surface water	biosphere
Zinc II	1.96e-06	biosphere3		kilogram	water::surface water	biosphere
poly-silicon production	1	Renewables_SSP2-NPi_2025	RER	kilogram		production	silicon, poly-silicon
Silicon production, solar grade, modified Siemens process	1.13	Renewables_SSP2-NPi_2025	GLO	kilogram		technosphere	silicon, metallurgical grade
chlor-alkali electrolysis, membrane cell	0.348	ecoinvent_3.9.1_cutoff_PV_update	RER	kilogram		technosphere	sodium hydroxide, without water, in 50% solution state
market for hydrochloric acid, without water, in 30% solution state	1.6	ecoinvent_3.9.1_cutoff_PV_update	RER	kilogram		technosphere	hydrochloric acid, without water, in 30% solution state
market for hydrogen, liquid	0.0501	ecoinvent_3.9.1_cutoff_PV_update	RER	kilogram		technosphere	hydrogen, liquid
market group for electricity, medium voltage	72	ecoinvent_3.9.1_cutoff_PV_update	RER	kilowatt hour		technosphere	electricity, medium voltage
market group for heat, district or industrial, natural gas	70	ecoinvent_3.9.1_cutoff_PV_update	RER	megajoule		technosphere	heat, district or industrial, natural gas
silicone factory construction	1e-11	ecoinvent_3.9.1_cutoff_PV_update	RER	unit		technosphere	silicone factory
Activity	poly-silicon production
code	5034e6c38785477987d2097fce9205c8
comment	Adapted from Müller et al. (2021): A comparative life cycle assessment of silicon PV modules: Impact of module design, manufacturing location and inventory.
location	CN
reference product	silicon, poly-silicon
type	process
unit	kilogram
worksheet name	Renewables_SSP2-NPi_2025
Exchanges
name	amount	database	location	unit	categories	type	reference product
AOX, Adsorbable Organic Halogen	1.26e-05	biosphere3		kilogram	water::surface water	biosphere
BOD5, Biological Oxygen Demand	0.000205	biosphere3		kilogram	water::surface water	biosphere
COD, Chemical Oxygen Demand	0.00202	biosphere3		kilogram	water::surface water	biosphere
Chloride	0.036	biosphere3		kilogram	water::surface water	biosphere
Copper ion	1.02e-07	biosphere3		kilogram	water::surface water	biosphere
DOC, Dissolved Organic Carbon	0.00091	biosphere3		kilogram	water::surface water	biosphere
Iron ion	5.61e-06	biosphere3		kilogram	water::surface water	biosphere
Nitrogen	0.000208	biosphere3		kilogram	water::surface water	biosphere
Phosphate	2.8e-06	biosphere3		kilogram	water::surface water	biosphere
Sodium I	0.0338	biosphere3		kilogram	water::surface water	biosphere
TOC, Total Organic Carbon	0.00091	biosphere3		kilogram	water::surface water	biosphere
Zinc II	1.96e-06	biosphere3		kilogram	water::surface water	biosphere
poly-silicon production	1	Renewables_SSP2-NPi_2025	CN	kilogram		production	silicon, poly-silicon
Silicon production, solar grade, modified Siemens process	1.13	Renewables_SSP2-NPi_2025	CN	kilogram		technosphere	silicon, metallurgical grade
market for hydrochloric acid, without water, in 30% solution state	1.6	ecoinvent_3.9.1_cutoff_PV_update	RoW	kilogram		technosphere	hydrochloric acid, without water, in 30% solution state
market for hydrogen, liquid	0.0501	ecoinvent_3.9.1_cutoff_PV_update	RoW	kilogram		technosphere	hydrogen, liquid
market for silicone factory	1e-11	ecoinvent_3.9.1_cutoff_PV_update	GLO	unit		technosphere	silicone factory
market for sodium hydroxide, without water, in 50% solution state	0.348	ecoinvent_3.9.1_cutoff_PV_update	GLO	kilogram		technosphere	sodium hydroxide, without water, in 50% solution state
market group for electricity, medium voltage	72	ecoinvent_3.9.1_cutoff_PV_update	CN	kilowatt hour		technosphere	electricity, medium voltage
market group for heat, district or industrial, natural gas	70	ecoinvent_3.9.1_cutoff_PV_update	GLO	megajoule		technosphere	heat, district or industrial, natural gas
Activity	poly-silicon production
code	66b130901e3847deab1b48291837e7b7
comment	Adapted from Müller et al. (2021): A comparative life cycle assessment of silicon PV modules: Impact of module design, manufacturing location and inventory.
location	RoW
reference product	silicon, poly-silicon
type	process
unit	kilogram
worksheet name	Renewables_SSP2-NPi_2025
Exchanges
name	amount	database	location	unit	categories	type	reference product
AOX, Adsorbable Organic Halogen	1.26e-05	biosphere3		kilogram	water::surface water	biosphere
BOD5, Biological Oxygen Demand	0.000205	biosphere3		kilogram	water::surface water	biosphere
COD, Chemical Oxygen Demand	0.00202	biosphere3		kilogram	water::surface water	biosphere
Chloride	0.036	biosphere3		kilogram	water::surface water	biosphere
Copper ion	1.02e-07	biosphere3		kilogram	water::surface water	biosphere
DOC, Dissolved Organic Carbon	0.00091	biosphere3		kilogram	water::surface water	biosphere
Iron ion	5.61e-06	biosphere3		kilogram	water::surface water	biosphere
Nitrogen	0.000208	biosphere3		kilogram	water::surface water	biosphere
Phosphate	2.8e-06	biosphere3		kilogram	water::surface water	biosphere
Sodium I	0.0338	biosphere3		kilogram	water::surface water	biosphere
TOC, Total Organic Carbon	0.00091	biosphere3		kilogram	water::surface water	biosphere
Zinc II	1.96e-06	biosphere3		kilogram	water::surface water	biosphere
poly-silicon production	1	Renewables_SSP2-NPi_2025	RoW	kilogram		production	silicon, poly-silicon
Silicon production, solar grade, modified Siemens process	1.13	Renewables_SSP2-NPi_2025	RoW	kilogram		technosphere	silicon, metallurgical grade
market for heat, district or industrial, natural gas	70	ecoinvent_3.9.1_cutoff_PV_update	RoW	megajoule		technosphere	heat, district or industrial, natural gas
market for hydrochloric acid, without water, in 30% solution state	1.6	ecoinvent_3.9.1_cutoff_PV_update	RoW	kilogram		technosphere	hydrochloric acid, without water, in 30% solution state
market for hydrogen, liquid	0.0501	ecoinvent_3.9.1_cutoff_PV_update	RoW	kilogram		technosphere	hydrogen, liquid
market for silicone factory	1e-11	ecoinvent_3.9.1_cutoff_PV_update	GLO	unit		technosphere	silicone factory
market for sodium hydroxide, without water, in 50% solution state	0.348	ecoinvent_3.9.1_cutoff_PV_update	GLO	kilogram		technosphere	sodium hydroxide, without water, in 50% solution state
market group for electricity, medium voltage	72	Renewables_SSP2-NPi_2025	PV producing countries except China/Europe	kilowatt hour		technosphere	electricity, medium voltage
Activity	poly-silicon production
code	cada6be6bd814fa7b4940b45957dd5ac
comment	Adapted from Müller et al. (2021): A comparative life cycle assessment of silicon PV modules: Impact of module design, manufacturing location and inventory.
location	GLO
reference product	silicon, poly-silicon
type	process
unit	kilogram
worksheet name	Renewables_SSP2-NPi_2025
Exchanges
name	amount	database	location	unit	categories	type	reference product
AOX, Adsorbable Organic Halogen	1.26e-05	biosphere3		kilogram	water::surface water	biosphere
BOD5, Biological Oxygen Demand	0.000205	biosphere3		kilogram	water::surface water	biosphere
COD, Chemical Oxygen Demand	0.00202	biosphere3		kilogram	water::surface water	biosphere
Chloride	0.036	biosphere3		kilogram	water::surface water	biosphere
Copper ion	1.02e-07	biosphere3		kilogram	water::surface water	biosphere
DOC, Dissolved Organic Carbon	0.00091	biosphere3		kilogram	water::surface water	biosphere
Iron ion	5.61e-06	biosphere3		kilogram	water::surface water	biosphere
Nitrogen	0.000208	biosphere3		kilogram	water::surface water	biosphere
Phosphate	2.8e-06	biosphere3		kilogram	water::surface water	biosphere
Sodium I	0.0338	biosphere3		kilogram	water::surface water	biosphere
TOC, Total Organic Carbon	0.00091	biosphere3		kilogram	water::surface water	biosphere
Zinc II	1.96e-06	biosphere3		kilogram	water::surface water	biosphere
poly-silicon production	1	Renewables_SSP2-NPi_2025	GLO	kilogram		production	silicon, poly-silicon
Silicon production, solar grade, modified Siemens process	1.13	Renewables_SSP2-NPi_2025	CN	kilogram		technosphere	silicon, metallurgical grade
market for hydrochloric acid, without water, in 30% solution state	1.6	ecoinvent_3.9.1_cutoff_PV_update	RER	kilogram		technosphere	hydrochloric acid, without water, in 30% solution state
market for hydrogen, liquid	0.0501	ecoinvent_3.9.1_cutoff_PV_update	RER	kilogram		technosphere	hydrogen, liquid
market for sodium hydroxide, without water, in 50% solution state	0.348	ecoinvent_3.9.1_cutoff_PV_update	GLO	kilogram		technosphere	sodium hydroxide, without water, in 50% solution state
market group for electricity, medium voltage	72	ecoinvent_3.9.1_cutoff_PV_update	GLO	kilowatt hour		technosphere	electricity, medium voltage
market group for heat, district or industrial, natural gas	70	ecoinvent_3.9.1_cutoff_PV_update	GLO	megajoule		technosphere	heat, district or industrial, natural gas
silicone factory construction	1e-11	ecoinvent_3.9.1_cutoff_PV_update	RER	unit		technosphere	silicone factory
Activity	single-crystalline Si wafering & bricking
code	7607aeeaa8a84bc8a676b8d70a3a55e9
comment	Adapted from Müller et al. (2021): A comparative life cycle assessment of silicon PV modules: Impact of module design, manufacturing location and inventory.
location	RER
reference product	single-Si wafer, photovoltaic
type	process
unit	square meter
worksheet name	Renewables_SSP2-NPi_2025
Exchanges
name	amount	database	location	unit	categories	type	reference product
AOX, Adsorbable Organic Halogen	0.000501	biosphere3		kilogram	water::surface water	biosphere
BOD5, Biological Oxygen Demand	0.0296	biosphere3		kilogram	water::surface water	biosphere
COD, Chemical Oxygen Demand	0.0296	biosphere3		kilogram	water::surface water	biosphere
Copper ion	6.05e-05	biosphere3		kilogram	water::surface water	biosphere
DOC, Dissolved Organic Carbon	0.0111	biosphere3		kilogram	water::surface water	biosphere
Nitrogen	0.00994	biosphere3		kilogram	water::surface water	biosphere
TOC, Total Organic Carbon	0.0111	biosphere3		kilogram	water::surface water	biosphere
Water	0.00975	biosphere3		cubic meter	air	biosphere
Water	0.025	biosphere3		cubic meter	water	biosphere
single-crystalline Si wafering & bricking	1	Renewables_SSP2-NPi_2025	RER	square meter		production	single-Si wafer, photovoltaic
Czochralski (Cz) silicon production	1.03	Renewables_SSP2-NPi_2025	RER	kilogram		technosphere	silicon, single crystal, Czochralski
alkylbenzene sulfonate production, linear, petrochemical	0.034	ecoinvent_3.9.1_cutoff_PV_update	RER	kilogram		technosphere	alkylbenzene sulfonate, linear, petrochemical
chlor-alkali electrolysis, membrane cell	0.015	ecoinvent_3.9.1_cutoff_PV_update	RER	kilogram		technosphere	sodium hydroxide, without water, in 50% solution state
citric acid production	0.187	ecoinvent_3.9.1_cutoff_PV_update	RER	kilogram		technosphere	citric acid
market for acrylic binder, with water, in 54% solution state	0.00498	ecoinvent_3.9.1_cutoff_PV_update	RER	kilogram		technosphere	acrylic binder, with water, in 54% solution state
market for brass	0.00745	ecoinvent_3.9.1_cutoff_PV_update	RoW	kilogram		technosphere	brass
market for glass wool mat	0.0106	ecoinvent_3.9.1_cutoff_PV_update	GLO	kilogram		technosphere	glass wool mat
market for hydrogen peroxide, without water, in 50% solution state	0.0253	ecoinvent_3.9.1_cutoff_PV_update	RER	kilogram		technosphere	hydrogen peroxide, without water, in 50% solution state
market for waste, from silicon wafer production	0.02	ecoinvent_3.9.1_cutoff_PV_update	GLO	kilogram		technosphere	waste, from silicon wafer production
market for water, completely softened	21.7	ecoinvent_3.9.1_cutoff_PV_update	RER	kilogram		technosphere	water, completely softened
market group for electricity, medium voltage	2.35	ecoinvent_3.9.1_cutoff_PV_update	RER	kilowatt hour		technosphere	electricity, medium voltage
market group for heat, district or industrial, natural gas	1.8	ecoinvent_3.9.1_cutoff_PV_update	RER	megajoule		technosphere	heat, district or industrial, natural gas
potassium hydroxide production	0.00381	ecoinvent_3.9.1_cutoff_PV_update	RER	kilogram		technosphere	potassium hydroxide
steel production, low-alloyed, hot rolled	0.000896	ecoinvent_3.9.1_cutoff_PV_update	RER	kilogram		technosphere	steel, low-alloyed, hot rolled
wafer factory construction	2e-06	ecoinvent_3.9.1_cutoff_PV_update	DE	unit		technosphere	wafer factory
wire drawing, steel	0.000896	ecoinvent_3.9.1_cutoff_PV_update	RER	kilogram		technosphere	wire drawing, steel
Activity	single-crystalline Si wafering & bricking
code	82a518d33a68444d95f17286efea5d22
comment	Adapted from Müller et al. (2021): A comparative life cycle assessment of silicon PV modules: Impact of module design, manufacturing location and inventory.
location	CN
reference product	single-Si wafer, photovoltaic
[truncated: 177 more rows]
