# Supplementary material for: Digesting fossil infrastructure for cleaner energy transitions
Source: Research Square preprint supplement (doi:10.21203/rs.3.rs-6346491/v1), 2025-06-06
Supplement: Supplementary file 73 [file process_agg.xlsx]

## Sheet: Tabelle1
process	agg
activated bentonite production	Act. Bentonite
air separation, cryogenic	Air seperation
aluminium electrolysis facility construction	Al electr. constr.
magnesium oxide production	Alloy metal
ferronickel production	Alloy metal
cobalt production	Alloy metal
ferrochromium production, high-carbon, 68% Cr	Alloy metal
ferromanganese production, high-coal, 74.5% Mn	Alloy metal
manganese concentrate production	Alloy metal
ferrosilicon production	Alloy metal
ammonium nitrate production	Ammonium nitrate
treatment of redmud from bauxite digestion, residual material landfill	Bauxite mining
bauxite mine operation	Bauxite mining
benzene production	Benzene
steel production, converter, low-alloyed	BF-BOF
steel production, converter, unalloyed	BF-BOF
steel production, converter, low-alloyed, 2025	BF-BOF
blast furnace production	BF-BOF constr.
blasting	Blasting
treatment of basic oxygen furnace dust, residual material landfill	BOF dust
treatment of basic oxygen furnace slag, residual material landfill	BOF slag
treatment of basic oxygen furnace secondary metallurgy slag, residual material landfill	BOF slag
treatment of blast furnace sludge, residual material landfill	BOF sludge
treatment of basic oxygen furnace waste, residual material landfill	BOF waste
canal construction	Canal contr,
chromite ore concentrate production	Chromite
clinker production	Clinker
hard coal mine operation	Coal mining
hard coal mine operation and hard coal preparation	Coal mining
treatment of spoil from hard coal mining, in surface landfill	Coal mining
treatment of spoil from lignite mining, in surface landfill	Coal mining
hard coal mine operation, open cast, dragline	Coal mining
hard coal mine operation, open cast, truck and shovel	Coal mining
hard coal mine operation, underground	Coal mining
lignite mine operation	Coal mining
mine construction, underground, hard coal	Coal mining
coking	Coking
copper production, cathode, solvent extraction and electrowinning process	Copper
treatment of sulfidic tailings, from copper mine operation, tailings impoundment	Copper mining
copper mine operation and beneficiation, sulfide ore	Copper mining
treatment of copper scrap by electrolytic refining	Copper refining
smelting of copper concentrate, sulfide ore	Copper smelting
diesel production, petroleum refinery operation	Diesel refinery
reinforcing steel production, electric, optimistic, remind SSP2-Base, 2025	EAF
reinforcing steel production, electric, pessimistic, remind SSP2-Base, 2025	EAF
steel production, electric, reinforcing steel, optimistic, 2025	EAF
steel production, electric, reinforcing steel, pessimistic, 2025	EAF
steel production, electric, low-alloyed, optimistic, 2025	EAF
steel production, electric, low-alloyed, pessimistic, 2025	EAF
steel production, electric, chromium steel 18/8, optimistic, 2025	EAF
steel production, from primary iron, chromium steel 18/8, optimistic, 2025	EAF
steel production, from primary iron, chromium steel 18/8, pessimistic, 2025	EAF
steel production, electric, chromium steel 18/8, pessimistic, 2025	EAF
electric arc furnace converter construction	EAF construction
treatment of electric arc furnace dust, residual material landfill, optimistic, remind SSP2-Base, 2025	EAF dust
treatment of electric arc furnace dust, residual material landfill, pessimistic, remind SSP2-Base, 2025	EAF dust
treatment of electric arc furnace dust, residual material landfill	EAF dust
treatment of electric arc furnace dust, residual material landfill, optimistic, 2025	EAF dust
treatment of electric arc furnace dust, residual material landfill, pessimistic, 2025	EAF dust
treatment of electric arc furnace slag, reinforcing steel, residual material landfill, optimistic, remind SSP2-Base, 2025	EAF slag
treatment of electric arc furnace slag, reinforcing steel, residual material landfill, pessimistic, remind SSP2-Base, 2025	EAF slag
treatment of electric arc furnace slag, residual material landfill	EAF slag
treatment of electric arc furnace slag, reinforcing steel, residual material landfill, optimistic, 2025	EAF slag
treatment of electric arc furnace slag, reinforcing steel, residual material landfill, pessimistic, 2025	EAF slag
treatment of electric arc furnace slag, low-alloyed steel, residual material landfill, optimistic, 2025	EAF slag
treatment of electric arc furnace slag, low-alloyed steel, residual material landfill, pessimistic, 2025	EAF slag
treatment of electric arc furnace slag, chromium steel, residual material landfill, optimistic, 2025	EAF slag
treatment of electric arc furnace slag, chromium steel, residual material landfill, pessimistic, 2025	EAF slag
treatment of electric arc furnace slag, residual material landfill, pessimistic, 2025	EAF slag
treatment of electric arc furnace slag, residual material landfill, optimistic, 2025	EAF slag
market for electricity, high voltage, cobalt industry	Electricity
electricity production, hard coal	Electricity, coal
electricity production, hard coal, at coal mine power plant	Electricity, coal
electricity production, lignite	Electricity, coal
electricity production, hard coal, conventional	Electricity, coal
electricity production, hard coal	Electricity, coal
electricity production, natural gas, combined cycle power plant	Electricity, coal
electricity production, hard coal, at coal mine power plant	Electricity, coal
electricity production, lignite	Electricity, coal
electricity production, hydro, reservoir, alpine region	Electricity, hydro
electricity production, hydro, reservoir, non-alpine region	Electricity, hydro
electricity production, hydro, reservoir, tropical region	Electricity, hydro
electricity production, lignite	Electricity, hydro
electricity production, natural gas, combined cycle power plant	Electricity, NG
electricity production, natural gas, combined cycle power plant	Electricity, NG
electricity production, nuclear, boiling water reactor	Electricity, nuclear
electricity production, nuclear, pressure water reactor	Electricity, nuclear
electricity production, nuclear, pressure water reactor, heavy water moderated	Electricity, nuclear
electricity production, oil	Electricity, oil
electricity production, oil	Electricity, oil
ethylene production, average	Ethylene
farming and supply of rapeseed	Farming & Forestry
soybean production	Farming & Forestry
hardwood forestry, beech, sustainable forest management	Farming & Forestry
hardwood forestry, birch, sustainable forest management	Farming & Forestry
hardwood forestry, oak, sustainable forest management	Farming & Forestry
softwood forestry, mixed species, boreal forest	Farming & Forestry
softwood forestry, pine, sustainable forest management	Farming & Forestry
softwood forestry, spruce, sustainable forest management	Farming & Forestry
softwood forestry, mixed species, sustainable forest management	Farming & Forestry
hard coal, import from ZA	Hard coal
market for hard coal	Hard coal
diesel, burned in building machine	Heat
heat and power co-generation, hard coal	Heat
heat and power co-generation, lignite	Heat
heat production, at coal coke industrial furnace 1-10MW	Heat
heat production, at hard coal industrial furnace 1-10MW	Heat
heat and power co-generation, natural gas, conventional power plant, 100MW electrical	Heat
sweet gas, burned in gas turbine	Heat
heat production, heavy fuel oil, at industrial furnace 1MW	Heat
heat production, wood chips from industry, at furnace 300kW	Heat
heat production, natural gas, at industrial furnace >100kW	Heat
iron ore mine operation and beneficiation	Iron ore mining
iron ore mine operation, 46% Fe	Iron ore mining
iron ore mine operation, 63% Fe	Iron ore mining
iron ore beneficiation	Iron ore mining
iron pellet production	Iron pellet
iron pellet production	Iron pellet
iron sinter production	Iron sinter
iron sinter production	Iron sinter
residual material landfill construction	Landfilling
lime production, milled, loose	Lime
limestone quarry operation	Limeston mining
lubricating oil production	Lubricating oil
platinum group metal mine operation, ore with high palladium content	Mining
treatment of sulfidic tailings, from nickel mine operation, tailings impoundment	Nickel mining
nickel mine operation and benefication to nickel concentrate, 7% Ni	Nickel mining
nickel mine operation and benefication to nickel concentrate, 16% Ni	Nickel mining
smelting and refining of nickel concentrate, 16% Ni	Nickel smelting
treatment of nickel smelter slag, residual material landfill	Nickel smelting
nitric acid production, product in 50% solution state	Nitric acid
petroleum and gas production, offshore	Oil & gas extraction
petroleum and gas production, onshore	Oil & gas extraction
treatment of waste natural gas, sweet, burned in production flare	Oil & gas extraction
treatment of water discharge from petroleum extraction, offshore	Oil & gas extraction
treatment of water discharge from petroleum/natural gas extraction, onshore	Oil & gas extraction
onshore petroleum field infrastructure construction	Oil & gas extraction
Rest	Other
hydrogen production, gaseous, 30 bar, from hard coal gasification and reforming, at coal gasification plant	Other
Sohio process	Other
desulfurisation of hard coal flue gas	Other
rest	Other
Other	Other
treatment of sulfidic tailings, generic, tailings impoundment	Other mining
process-specific burdens, residual material landfill	Landfilling
treatment of non-sulfidic tailing, off-site	Other mining
basalt quarry operation	Other mining
bentonite quarry operation	Other mining
clay pit operation	Other mining
molybdenite mine operation	Other mining
rare earth element mine operation and beneficiation, bastnaesite and monazite ore	Iron ore mining
rare earth element mine operation and beneficiation, bastnaesite ore	Rare earth mining
vanadium-titanomagnetite mine operation and beneficiation	Other mining
treatment of non-sulfidic overburden, off-site	Other mining
platinum group metal, mine and concentration operations	Other mining
paraffin production	Paraffin
open ground construction, on ground	Photovoltaics
photovoltaic cell production, multi-Si wafer	Photovoltaics
pig iron production	Pig iron
pig iron production	Pig iron
propylene production	Propylene
quicklime production, in pieces, loose	Quicklime
quicklime production, in pieces, loose	Quicklime
treatment of low level radioactive waste, plasma torch incineration	Radioactive waste
treatment of spent nuclear fuel, reprocessing	Radioactive waste
railway track construction	Railway
road construction	Road
heavy mineral sand quarry operation and titania slag production	Sand mining
scrap preparation facility construction	Scrap facility
treatment of sulfidic tailings, from silver mine operation, tailings impoundment	Silver mining
sodium percarbonate production, powder	Sodium percarbonate
sponge iron production	Sponge iron
hot rolling, steel	Steel rolling
treatment of sludge from steel rolling, residual material landfill	Steel sludge
transport, freight train, diesel	Transport
transport, freight, sea, bulk carrier for dry goods	Transport
transport, freight, sea, tanker for petroleum	Transport
treatment of brake wear emissions, lorry	Transport
treatment of tyre wear emissions, lorry	Transport
transport, freight, inland waterways, barge	Transport
transport, freight, lorry, diesel, 18t gross weight, 2025, EURO-VI, regional delivery	Transport
transport, freight, lorry, diesel, 3.5t gross weight, 2020, EURO-VI, regional delivery	Transport
transport, freight, lorry, diesel, 3.5t gross weight, 2025, EURO-VI, regional delivery	Transport
transport, freight, lorry, diesel, 7.5t gross weight, 2025, EURO-VI, regional delivery	Transport
transport, freight, lorry 16-32 metric ton, EURO3	Transport
transport, freight, lorry >32 metric ton, EURO3	Transport
transport, freight, sea, container ship	Transport
transport, freight, lorry, diesel, 40t gross weight, EURO-VI, long haul	Transport
treatment of road wear emissions, lorry	Transport
transport, freight, lorry, diesel, 18t gross weight, EURO-VI, long haul	Transport
transport, freight, lorry, diesel, 26t gross weight, EURO-VI, long haul	Transport
transport, freight, lorry, diesel, 3.5t gross weight, EURO-VI, long haul	Transport
transport, freight, lorry, diesel, 7.5t gross weight, EURO-VI, long haul	Transport
treatment of uranium tailing, non-radioactive emission	Uranium mining
treatment of tailing, from uranium milling	Uranium mining
uranium mine operation, open cast	Uranium mining
uranium mine operation, underground	Uranium mining
uranium production, in yellowcake, in-situ leaching	Uranium prod.
uranium production, in yellowcake	Uranium prod.
natural gas venting from petroleum/natural gas production	Venting
treatment of waste polyurethane, unsanitary landfill, wet infiltration class (500mm)	Waste plastic
treatment of waste plastic, mixture, open dump, wet infiltration class (500mm)	Waste plastic
treatment of waste plastic, mixture, unsanitary landfill, wet infiltration class (500mm)	Waste plastic
treatment of waste polyurethane, open dump, wet infiltration class (500mm)	Waste plastic
treatment of coal slurry, impoundment	Waste treatment
treatment of hard coal ash, residual material landfill	Waste treatment
treatment of scrap copper, municipal incineration	Waste treatment
treatment of waste cement, hydrated, residual material landfill	Waste treatment
treatment of zinc in car shredder residue, municipal incineration	Waste treatment
treatment of zinc in car shredder residue, municipal incineration with fly ash extraction	Waste treatment
treatment of average incineration residue, residual material landfill	Waste treatment
treatment of lignite ash, opencast refill	Waste treatment
treatment of decarbonising waste, residual material landfill	Waste treatment
treatment of copper slag, residual material landfill	Waste treatment
treatment of mill scale, residual material landfill	Waste treatment
treatment of dross from Al electrolysis, residual material landfill	Waste treatment
treatment of waste graphical paper, unsanitary landfill, wet infiltration class (500mm)	Waste treatment
treatment of waste wood, untreated, sanitary landfill	Waste treatment
treatment of waste wood, untreated, unsanitary landfill, wet infiltration class (500mm)	Waste wood
treatment of waste wood, untreated, open dump, wet infiltration class (500mm)	Waste wood
treatment of waste wood, untreated, sanitary landfill	Waste wood
treatment of waste wood, untreated, unsanitary landfill, moist infiltration class (300mm)	Waste wood
market for wastewater, average	Wastewater
treatment of sewage sludge, 97% water, WWT, WW, average, landfarming	Wastewater
treatment of wastewater, average, wastewater treatment	Wastewater
treatment of wastewater from PV cell production, wastewater treatment	Wastewater
zinc mine operation	Zinc mining
treatment of sulfidic tailings, from zinc-lead mine operation, tailings impoundment	Zinc-lead mining
