# Supplementary material for: Digesting fossil infrastructure for cleaner energy transitions
Source: Research Square preprint supplement (doi:10.21203/rs.3.rs-6346491/v1), 2025-06-06
Supplement: Supplementary file 93 [file lci-steel_prod_SSP2-NPi.xlsx]

## Sheet: steel_prod_SSP2-NPi
Database	steel_prod_SSP2-NPi
format	Brightway2 copy
Activity	preperation for recycling, steel scrap, from fossil infrastructure, 2025
code	cdddcbcb6f814206b85bed72e4adf723
location	GLO
reference product	steel scrap, from fossil infrastructure
scenario	SSP2-NPi
type	process
unit	kilogram
worksheet name	steel_prod_SSP2-NPi
year	2025
Exchanges
name	amount	database	location	unit	type	default_amount	reference product
preperation for recycling, steel scrap, from fossil infrastructure, 2025	1	steel_prod_SSP2-NPi	GLO	kilogram	production	1	steel scrap, from fossil infrastructure
sorting and pressing of metal scrap, 2025	1	steel_prod_SSP2-NPi	GLO	kilogram	technosphere	1	sorting and pressing of metal scrap
transport of steel scrap, from fossil infrastructure, cut-off, 2025	1	steel_prod_SSP2-NPi	GLO	kilogram	technosphere	1	steel scrap, from fossil infrastructure, cut-off
Activity	preperation for recycling, steel scrap, from fossil infrastructure, 2030
code	34501f76d2344379a3cfc021b25578a8
location	GLO
reference product	steel scrap, from fossil infrastructure
scenario	SSP2-NPi
type	process
unit	kilogram
worksheet name	steel_prod_SSP2-NPi
year	2030
Exchanges
name	amount	database	location	unit	type	default_amount	reference product
preperation for recycling, steel scrap, from fossil infrastructure, 2030	1	steel_prod_SSP2-NPi	GLO	kilogram	production	1	steel scrap, from fossil infrastructure
sorting and pressing of metal scrap, 2030	1	steel_prod_SSP2-NPi	GLO	kilogram	technosphere	1	sorting and pressing of metal scrap
transport of steel scrap, from fossil infrastructure, cut-off, 2030	1	steel_prod_SSP2-NPi	GLO	kilogram	technosphere	1	steel scrap, from fossil infrastructure, cut-off
Activity	preperation for recycling, steel scrap, from fossil infrastructure, 2035
code	2175af906d01428a968b9e122b36f7d2
location	GLO
reference product	steel scrap, from fossil infrastructure
scenario	SSP2-NPi
type	process
unit	kilogram
worksheet name	steel_prod_SSP2-NPi
year	2035
Exchanges
name	amount	database	location	unit	type	default_amount	reference product
preperation for recycling, steel scrap, from fossil infrastructure, 2035	1	steel_prod_SSP2-NPi	GLO	kilogram	production	1	steel scrap, from fossil infrastructure
sorting and pressing of metal scrap, 2035	1	steel_prod_SSP2-NPi	GLO	kilogram	technosphere	1	sorting and pressing of metal scrap
transport of steel scrap, from fossil infrastructure, cut-off, 2035	1	steel_prod_SSP2-NPi	GLO	kilogram	technosphere	1	steel scrap, from fossil infrastructure, cut-off
Activity	preperation for recycling, steel scrap, from fossil infrastructure, 2040
code	a1c9a21785ff45a38d9e2cb1c9c25c89
location	GLO
reference product	steel scrap, from fossil infrastructure
scenario	SSP2-NPi
type	process
unit	kilogram
worksheet name	steel_prod_SSP2-NPi
year	2040
Exchanges
name	amount	database	location	unit	type	default_amount	reference product
preperation for recycling, steel scrap, from fossil infrastructure, 2040	1	steel_prod_SSP2-NPi	GLO	kilogram	production	1	steel scrap, from fossil infrastructure
sorting and pressing of metal scrap, 2040	1	steel_prod_SSP2-NPi	GLO	kilogram	technosphere	1	sorting and pressing of metal scrap
transport of steel scrap, from fossil infrastructure, cut-off, 2040	1	steel_prod_SSP2-NPi	GLO	kilogram	technosphere	1	steel scrap, from fossil infrastructure, cut-off
Activity	preperation for recycling, steel scrap, from fossil infrastructure, 2045
code	543859d028a949419707096b76c73988
location	GLO
reference product	steel scrap, from fossil infrastructure
scenario	SSP2-NPi
type	process
unit	kilogram
worksheet name	steel_prod_SSP2-NPi
year	2045
Exchanges
name	amount	database	location	unit	type	default_amount	reference product
preperation for recycling, steel scrap, from fossil infrastructure, 2045	1	steel_prod_SSP2-NPi	GLO	kilogram	production	1	steel scrap, from fossil infrastructure
sorting and pressing of metal scrap, 2045	1	steel_prod_SSP2-NPi	GLO	kilogram	technosphere	1	sorting and pressing of metal scrap
transport of steel scrap, from fossil infrastructure, cut-off, 2045	1	steel_prod_SSP2-NPi	GLO	kilogram	technosphere	1	steel scrap, from fossil infrastructure, cut-off
Activity	preperation for recycling, steel scrap, from fossil infrastructure, 2050
code	f7ec7b3d47c84d6c9e1db566681e1549
location	GLO
reference product	steel scrap, from fossil infrastructure
scenario	SSP2-NPi
type	process
unit	kilogram
worksheet name	steel_prod_SSP2-NPi
year	2050
Exchanges
name	amount	database	location	unit	type	default_amount	reference product
preperation for recycling, steel scrap, from fossil infrastructure, 2050	1	steel_prod_SSP2-NPi	GLO	kilogram	production	1	steel scrap, from fossil infrastructure
sorting and pressing of metal scrap, 2050	1	steel_prod_SSP2-NPi	GLO	kilogram	technosphere	1	sorting and pressing of metal scrap
transport of steel scrap, from fossil infrastructure, cut-off, 2050	1	steel_prod_SSP2-NPi	GLO	kilogram	technosphere	1	steel scrap, from fossil infrastructure, cut-off
Activity	reinforcing steel production, converter, 2025
code	31f157905c3e44a1a95583de072493d3
comment	Based on "reinforcing steel production" in ecoinvent 3.9.1 cutoff. Market mix of unalloyed and low-alloyed steel substituted with primary equivalent.
location	GLO
production amount	1
reference product	reinforcing steel
scenario	SSP2-NPi
type	process
unit	kilogram
worksheet name	steel_prod_SSP2-NPi
year	2025
Exchanges
name	amount	database	location	unit	type	default_amount	reference product
reinforcing steel production, converter, 2025	1	steel_prod_SSP2-NPi	GLO	kilogram	production	1	reinforcing steel
market for hot rolling, steel	1	remind - SSP2-NPi - 2025	GLO	kilogram	technosphere	1	hot rolling, steel
steel production, converter, low-alloyed, 2025	0.37	steel_prod_SSP2-NPi	World	kilogram	technosphere	0.37	steel, low-alloyed
steel production, converter, unalloyed	0.63	remind - SSP2-NPi - 2025	World	kilogram	technosphere	0.63	steel, unalloyed
Activity	reinforcing steel production, converter, 2030
code	53b1b223a60a4b7ab7b10f00bd5f603d
comment	Based on "reinforcing steel production" in ecoinvent 3.9.1 cutoff. Market mix of unalloyed and low-alloyed steel substituted with primary equivalent.
location	GLO
production amount	1
reference product	reinforcing steel
scenario	SSP2-NPi
type	process
unit	kilogram
worksheet name	steel_prod_SSP2-NPi
year	2030
Exchanges
name	amount	database	location	unit	type	default_amount	reference product
reinforcing steel production, converter, 2030	1	steel_prod_SSP2-NPi	GLO	kilogram	production	1	reinforcing steel
market for hot rolling, steel	1	remind - SSP2-NPi - 2030	GLO	kilogram	technosphere	1	hot rolling, steel
steel production, converter, low-alloyed, 2030	0.37	steel_prod_SSP2-NPi	World	kilogram	technosphere	0.37	steel, low-alloyed
steel production, converter, unalloyed	0.63	remind - SSP2-NPi - 2030	World	kilogram	technosphere	0.63	steel, unalloyed
Activity	reinforcing steel production, converter, 2035
code	6e6f0491239845ce863cd7addf5ce42b
comment	Based on "reinforcing steel production" in ecoinvent 3.9.1 cutoff. Market mix of unalloyed and low-alloyed steel substituted with primary equivalent.
location	GLO
production amount	1
reference product	reinforcing steel
scenario	SSP2-NPi
type	process
unit	kilogram
worksheet name	steel_prod_SSP2-NPi
year	2035
Exchanges
name	amount	database	location	unit	type	default_amount	reference product
reinforcing steel production, converter, 2035	1	steel_prod_SSP2-NPi	GLO	kilogram	production	1	reinforcing steel
market for hot rolling, steel	1	remind - SSP2-NPi - 2035	GLO	kilogram	technosphere	1	hot rolling, steel
steel production, converter, low-alloyed, 2035	0.37	steel_prod_SSP2-NPi	World	kilogram	technosphere	0.37	steel, low-alloyed
steel production, converter, unalloyed	0.63	remind - SSP2-NPi - 2035	World	kilogram	technosphere	0.63	steel, unalloyed
Activity	reinforcing steel production, converter, 2040
code	8e2012f6f88741aca90b8026e2f63a02
comment	Based on "reinforcing steel production" in ecoinvent 3.9.1 cutoff. Market mix of unalloyed and low-alloyed steel substituted with primary equivalent.
location	GLO
production amount	1
reference product	reinforcing steel
scenario	SSP2-NPi
type	process
unit	kilogram
worksheet name	steel_prod_SSP2-NPi
year	2040
Exchanges
name	amount	database	location	unit	type	default_amount	reference product
reinforcing steel production, converter, 2040	1	steel_prod_SSP2-NPi	GLO	kilogram	production	1	reinforcing steel
market for hot rolling, steel	1	remind - SSP2-NPi - 2040	GLO	kilogram	technosphere	1	hot rolling, steel
steel production, converter, low-alloyed, 2040	0.37	steel_prod_SSP2-NPi	World	kilogram	technosphere	0.37	steel, low-alloyed
steel production, converter, unalloyed	0.63	remind - SSP2-NPi - 2040	World	kilogram	technosphere	0.63	steel, unalloyed
Activity	reinforcing steel production, converter, 2045
code	d950af6fca0d493ab9be6515ae615f64
comment	Based on "reinforcing steel production" in ecoinvent 3.9.1 cutoff. Market mix of unalloyed and low-alloyed steel substituted with primary equivalent.
location	GLO
production amount	1
reference product	reinforcing steel
scenario	SSP2-NPi
type	process
unit	kilogram
worksheet name	steel_prod_SSP2-NPi
year	2045
Exchanges
name	amount	database	location	unit	type	default_amount	reference product
reinforcing steel production, converter, 2045	1	steel_prod_SSP2-NPi	GLO	kilogram	production	1	reinforcing steel
market for hot rolling, steel	1	remind - SSP2-NPi - 2045	GLO	kilogram	technosphere	1	hot rolling, steel
steel production, converter, low-alloyed, 2045	0.37	steel_prod_SSP2-NPi	World	kilogram	technosphere	0.37	steel, low-alloyed
steel production, converter, unalloyed	0.63	remind - SSP2-NPi - 2045	World	kilogram	technosphere	0.63	steel, unalloyed
Activity	reinforcing steel production, converter, 2050
code	f8f333cd0f2d475cb0b69becb52bb550
comment	Based on "reinforcing steel production" in ecoinvent 3.9.1 cutoff. Market mix of unalloyed and low-alloyed steel substituted with primary equivalent.
location	GLO
production amount	1
reference product	reinforcing steel
scenario	SSP2-NPi
type	process
unit	kilogram
worksheet name	steel_prod_SSP2-NPi
year	2050
Exchanges
name	amount	database	location	unit	type	default_amount	reference product
reinforcing steel production, converter, 2050	1	steel_prod_SSP2-NPi	GLO	kilogram	production	1	reinforcing steel
market for hot rolling, steel	1	remind - SSP2-NPi - 2050	GLO	kilogram	technosphere	1	hot rolling, steel
steel production, converter, low-alloyed, 2050	0.37	steel_prod_SSP2-NPi	World	kilogram	technosphere	0.37	steel, low-alloyed
steel production, converter, unalloyed	0.63	remind - SSP2-NPi - 2050	World	kilogram	technosphere	0.63	steel, unalloyed
Activity	sorting and pressing of metal scrap, 2025
code	2908181e34534289ac9580fb79d466b4
location	GLO
reference product	sorting and pressing of metal scrap
scenario	SSP2-NPi
type	process
unit	kilogram
worksheet name	steel_prod_SSP2-NPi
year	2025
Exchanges
name	amount	database	location	unit	type	default_amount	reference product
sorting and pressing of metal scrap, 2025	1	steel_prod_SSP2-NPi	GLO	kilogram	production	1	sorting and pressing of metal scrap
diesel, burned in building machine	0.1	remind - SSP2-NPi - 2025	GLO	megajoule	technosphere	0.1	diesel, burned in building machine
market for scrap preparation facility	1e-09	remind - SSP2-NPi - 2025	GLO	unit	technosphere	1e-09	scrap preparation facility
market group for electricity, medium voltage	0.01	remind - SSP2-NPi - 2025	GLO	kilowatt hour	technosphere	0.01	electricity, medium voltage
Activity	sorting and pressing of metal scrap, 2030
code	a55ecfa983a44b8a954539cbacecc409
location	GLO
reference product	sorting and pressing of metal scrap
scenario	SSP2-NPi
type	process
unit	kilogram
worksheet name	steel_prod_SSP2-NPi
year	2030
Exchanges
name	amount	database	location	unit	type	default_amount	reference product
sorting and pressing of metal scrap, 2030	1	steel_prod_SSP2-NPi	GLO	kilogram	production	1	sorting and pressing of metal scrap
diesel, burned in building machine	0.1	remind - SSP2-NPi - 2030	GLO	megajoule	technosphere	0.1	diesel, burned in building machine
market for scrap preparation facility	1e-09	remind - SSP2-NPi - 2030	GLO	unit	technosphere	1e-09	scrap preparation facility
market group for electricity, medium voltage	0.01	remind - SSP2-NPi - 2030	GLO	kilowatt hour	technosphere	0.01	electricity, medium voltage
Activity	sorting and pressing of metal scrap, 2035
code	bfefb743103b4c7fb989a7b2a83878d1
location	GLO
reference product	sorting and pressing of metal scrap
scenario	SSP2-NPi
type	process
unit	kilogram
worksheet name	steel_prod_SSP2-NPi
year	2035
Exchanges
name	amount	database	location	unit	type	default_amount	reference product
sorting and pressing of metal scrap, 2035	1	steel_prod_SSP2-NPi	GLO	kilogram	production	1	sorting and pressing of metal scrap
diesel, burned in building machine	0.1	remind - SSP2-NPi - 2035	GLO	megajoule	technosphere	0.1	diesel, burned in building machine
market for scrap preparation facility	1e-09	remind - SSP2-NPi - 2035	GLO	unit	technosphere	1e-09	scrap preparation facility
market group for electricity, medium voltage	0.01	remind - SSP2-NPi - 2035	GLO	kilowatt hour	technosphere	0.01	electricity, medium voltage
Activity	sorting and pressing of metal scrap, 2040
code	bceaeae32f78479bb1e4a36545c8ca34
location	GLO
reference product	sorting and pressing of metal scrap
scenario	SSP2-NPi
type	process
unit	kilogram
worksheet name	steel_prod_SSP2-NPi
year	2040
Exchanges
name	amount	database	location	unit	type	default_amount	reference product
sorting and pressing of metal scrap, 2040	1	steel_prod_SSP2-NPi	GLO	kilogram	production	1	sorting and pressing of metal scrap
diesel, burned in building machine	0.1	remind - SSP2-NPi - 2040	GLO	megajoule	technosphere	0.1	diesel, burned in building machine
market for scrap preparation facility	1e-09	remind - SSP2-NPi - 2040	GLO	unit	technosphere	1e-09	scrap preparation facility
market group for electricity, medium voltage	0.01	remind - SSP2-NPi - 2040	GLO	kilowatt hour	technosphere	0.01	electricity, medium voltage
Activity	sorting and pressing of metal scrap, 2045
code	c4b6671e13454884a4f65537545666c6
location	GLO
reference product	sorting and pressing of metal scrap
scenario	SSP2-NPi
type	process
unit	kilogram
worksheet name	steel_prod_SSP2-NPi
year	2045
Exchanges
name	amount	database	location	unit	type	default_amount	reference product
sorting and pressing of metal scrap, 2045	1	steel_prod_SSP2-NPi	GLO	kilogram	production	1	sorting and pressing of metal scrap
diesel, burned in building machine	0.1	remind - SSP2-NPi - 2045	GLO	megajoule	technosphere	0.1	diesel, burned in building machine
market for scrap preparation facility	1e-09	remind - SSP2-NPi - 2045	GLO	unit	technosphere	1e-09	scrap preparation facility
market group for electricity, medium voltage	0.01	remind - SSP2-NPi - 2045	GLO	kilowatt hour	technosphere	0.01	electricity, medium voltage
Activity	sorting and pressing of metal scrap, 2050
code	e39aff568ff149f7b379da196414935a
location	GLO
reference product	sorting and pressing of metal scrap
scenario	SSP2-NPi
type	process
unit	kilogram
worksheet name	steel_prod_SSP2-NPi
year	2050
Exchanges
name	amount	database	location	unit	type	default_amount	reference product
sorting and pressing of metal scrap, 2050	1	steel_prod_SSP2-NPi	GLO	kilogram	production	1	sorting and pressing of metal scrap
diesel, burned in building machine	0.1	remind - SSP2-NPi - 2050	GLO	megajoule	technosphere	0.1	diesel, burned in building machine
market for scrap preparation facility	1e-09	remind - SSP2-NPi - 2050	GLO	unit	technosphere	1e-09	scrap preparation facility
market group for electricity, medium voltage	0.01	remind - SSP2-NPi - 2050	GLO	kilowatt hour	technosphere	0.01	electricity, medium voltage
Activity	steel production, converter, low-alloyed, 2025
code	6c7dc8edc2594dfba72b1345367ef7e7
comment	This dataset has been modified by `premise`, according to the performance for steel production indicated by the IAM model REMIND for the IAM region World in 2100, following the scenario SSP1-NDC. The energy efficiency of the process has been improved by 12%."Background: This activity represents the production of primary low-alloyed steel in a basic oxygen furnace (BOF), a discontinuous process in…
location	World
reference product	steel, low-alloyed
scenario	SSP2-NPi
type	process
unit	kilogram
worksheet name	steel_prod_SSP2-NPi
year	2025
Exchanges
name	amount	database	location	unit	categories	type	default_amount	reference product
Carbon dioxide, fossil	0.0626236			kilogram	air	biosphere
Carbon dioxide, non-fossil	2.04331e-05			kilogram	air	biosphere
Carbon monoxide, fossil	0.00168214			kilogram	air	biosphere
Chromium III	2.73861e-08			kilogram	air	biosphere
Copper ion	1.38684e-07			kilogram	air	biosphere
Dioxins, measured as 2,3,7,8-tetrachlorodibenzo-p-dioxin	6.35767e-14			kilogram	air	biosphere
Heat, waste	0.204696			megajoule	air	biosphere
Iron ion	4.115e-05			kilogram	air	biosphere
Lead II	4.08167e-07			kilogram	air	biosphere
Manganese II	6.84105e-07			kilogram	air	biosphere
Nitrogen oxides	2.12368e-05			kilogram	air	biosphere
PAH, polycyclic aromatic hydrocarbons	1e-08			kilogram	air	biosphere
Particulate Matter, < 2.5 um	4.47437e-05			kilogram	air	biosphere
Water	0.00611841			cubic meter	air	biosphere
Water	5.00963e-06			cubic meter	air::non-urban air or from high stacks	biosphere
Water, cooling, unspecified natural origin	0.00577581			cubic meter	natural resource::in water	biosphere
Water, unspecified natural origin	2.50482e-05			cubic meter	natural resource::in water	biosphere
steel production, converter, low-alloyed, 2025	1	steel_prod_SSP2-NPi	World	kilogram		production	1	steel, low-alloyed
blast furnace gas, Recycled Content cut-off	-0.0304027	remind - SSP2-NPi - 2025	GLO	megajoule		technosphere	-0.0304027	blast furnace gas
market for aluminium, wrought alloy	8.78501e-05	remind - SSP2-NPi - 2025	GLO	kilogram		technosphere	8.78501e-05	aluminium, wrought alloy
market for argon, liquid	0.000116964	remind - SSP2-NPi - 2025	RoW	kilogram		technosphere	0.000116964	argon, liquid
market for basic oxygen furnace dust	-0.019396	remind - SSP2-NPi - 2025	RoW	kilogram		technosphere	-0.019396	basic oxygen furnace dust
market for basic oxygen furnace secondary metallurgy slag	-0.0003008	remind - SSP2-NPi - 2025	RoW	kilogram		technosphere	-0.0003008	basic oxygen furnace secondary metallurgy slag
market for basic oxygen furnace slag	-0.104898	remind - SSP2-NPi - 2025	RoW	kilogram		technosphere	-0.104898	basic oxygen furnace slag
market for basic oxygen furnace sludge	-0.0003008	remind - SSP2-NPi - 2025	RoW	kilogram		technosphere	-0.0003008	basic oxygen furnace sludge
market for basic oxygen furnace waste	-0.00335064	remind - SSP2-NPi - 2025	GLO	kilogram		technosphere	-0.00335064	basic oxygen furnace waste
market for blast oxygen furnace converter	1.3333e-11	remind - SSP2-NPi - 2025	GLO	unit		technosphere	1.3333e-11	blast oxygen furnace converter
market for calcium carbide, technical grade	0.000190693	remind - SSP2-NPi - 2025	RoW	kilogram		technosphere	0.000190693	calcium carbide, technical grade
market for coke	0.000183216	remind - SSP2-NPi - 2025	GLO	megajoule		technosphere	0.000183216	coke
market for compressed air, 600 kPa gauge	0.0144222	remind - SSP2-NPi - 2025	RoW	cubic meter		technosphere	0.0144222	compressed air, 600 kPa gauge
market for copper, cathode	7.98637e-07	remind - SSP2-NPi - 2025	GLO	kilogram		technosphere	7.98637e-07	copper, cathode
market for diesel	2.90413e-06	remind - SSP2-NPi - 2025	RoW	kilogram		technosphere	2.90413e-06	diesel
market for dolomite	0.00442218	remind - SSP2-NPi - 2025	RoW	kilogram		technosphere	0.00442218	dolomite
market for electricity, medium voltage	0.000576605	remind - SSP2-NPi - 2025	VN	kilowatt hour		technosphere	0.000576605	electricity, medium voltage
market for electricity, medium voltage	1.27593e-05	remind - SSP2-NPi - 2025	CY	kilowatt hour		technosphere	1.27593e-05	electricity, medium voltage
market for electricity, medium voltage	0.000163672	remind - SSP2-NPi - 2025	UZ	kilowatt hour		technosphere	0.000163672	electricity, medium voltage
market for electricity, medium voltage	4.56929e-05	remind - SSP2-NPi - 2025	TJ	kilowatt hour		technosphere	4.56929e-05	electricity, medium voltage
market for electricity, medium voltage	0.000473443	remind - SSP2-NPi - 2025	ID	kilowatt hour		technosphere	0.000473443	electricity, medium voltage
market for electricity, medium voltage	3.82103e-05	remind - SSP2-NPi - 2025	KG	kilowatt hour		technosphere	3.82103e-05	electricity, medium voltage
market for electricity, medium voltage	0.000297532	remind - SSP2-NPi - 2025	TH	kilowatt hour		technosphere	0.000297532	electricity, medium voltage
market for electricity, medium voltage	0.000261098	remind - SSP2-NPi - 2025	PH	kilowatt hour		technosphere	0.000261098	electricity, medium voltage
market for electricity, medium voltage	4.8956e-06	remind - SSP2-NPi - 2025	QA	kilowatt hour		technosphere	4.8956e-06	electricity, medium voltage
market for electricity, medium voltage	3.00521e-05	remind - SSP2-NPi - 2025	KH	kilowatt hour		technosphere	3.00521e-05	electricity, medium voltage
market for electricity, medium voltage	0.000122021	remind - SSP2-NPi - 2025	SG	kilowatt hour		technosphere	0.000122021	electricity, medium voltage
market for electricity, medium voltage	0.00141139	remind - SSP2-NPi - 2025	KR	kilowatt hour		technosphere	0.00141139	electricity, medium voltage
market for electricity, medium voltage	0.000596764	remind - SSP2-NPi - 2025	TW	kilowatt hour		technosphere	0.000596764	electricity, medium voltage
market for electricity, medium voltage	0.000113291	remind - SSP2-NPi - 2025	NZ	kilowatt hour		technosphere	0.000113291	electricity, medium voltage
market for electricity, medium voltage	3.03323e-05	remind - SSP2-NPi - 2025	GE	kilowatt hour		technosphere	3.03323e-05	electricity, medium voltage
market for electricity, medium voltage	3.67822e-05	remind - SSP2-NPi - 2025	LB	kilowatt hour		technosphere	3.67822e-05	electricity, medium voltage
market for electricity, medium voltage	0.000154597	remind - SSP2-NPi - 2025	IL	kilowatt hour		technosphere	0.000154597	electricity, medium voltage
market for electricity, medium voltage	4.60361e-05	remind - SSP2-NPi - 2025	TM	kilowatt hour		technosphere	4.60361e-05	electricity, medium voltage
market for electricity, medium voltage	5.75519e-05	remind - SSP2-NPi - 2025	MM	kilowatt hour		technosphere	5.75519e-05	electricity, medium voltage
market for electricity, medium voltage	6.44113e-06	remind - SSP2-NPi - 2025	YE	kilowatt hour		technosphere	6.44113e-06	electricity, medium voltage
market for electricity, medium voltage	0.000329828	remind - SSP2-NPi - 2025	PK	kilowatt hour		technosphere	0.000329828	electricity, medium voltage
market for electricity, medium voltage	1.69109e-05	remind - SSP2-NPi - 2025	AM	kilowatt hour		technosphere	1.69109e-05	electricity, medium voltage
market for electricity, medium voltage	5.63004e-05	remind - SSP2-NPi - 2025	AZ	kilowatt hour		technosphere	5.63004e-05	electricity, medium voltage
market for electricity, medium voltage	0.00069025	remind - SSP2-NPi - 2025	TR	kilowatt hour		technosphere	0.00069025	electricity, medium voltage
market for electricity, medium voltage	0.000184784	remind - SSP2-NPi - 2025	BD	kilowatt hour		technosphere	0.000184784	electricity, medium voltage
market for electricity, medium voltage	3.88544e-05	remind - SSP2-NPi - 2025	SY	kilowatt hour		technosphere	3.88544e-05	electricity, medium voltage
market for electricity, medium voltage	4.76386e-05	remind - SSP2-NPi - 2025	BH	kilowatt hour		technosphere	4.76386e-05	electricity, medium voltage
market for electricity, medium voltage	3.85723e-05	remind - SSP2-NPi - 2025	LK	kilowatt hour		technosphere	3.85723e-05	electricity, medium voltage
market for electricity, medium voltage	4.33284e-05	remind - SSP2-NPi - 2025	JO	kilowatt hour		technosphere	4.33284e-05	electricity, medium voltage
market for electricity, medium voltage	0.00225931	remind - SSP2-NPi - 2025	JP	kilowatt hour		technosphere	0.00225931	electricity, medium voltage
market for electricity, medium voltage	3.42881e-05	remind - SSP2-NPi - 2025	KP	kilowatt hour		technosphere	3.42881e-05	electricity, medium voltage
market for electricity, medium voltage	9.95727e-06	remind - SSP2-NPi - 2025	BN	kilowatt hour		technosphere	9.95727e-06	electricity, medium voltage
market for electricity, medium voltage	2.14721e-05	remind - SSP2-NPi - 2025	MN	kilowatt hour		technosphere	2.14721e-05	electricity, medium voltage
market for electricity, medium voltage	9.51554e-05	remind - SSP2-NPi - 2025	OM	kilowatt hour		technosphere	9.51554e-05	electricity, medium voltage
market for electricity, medium voltage	0.000262526	remind - SSP2-NPi - 2025	KZ	kilowatt hour		technosphere	0.000262526	electricity, medium voltage
market for electricity, medium voltage	0.000128484	remind - SSP2-NPi - 2025	HK	kilowatt hour		technosphere	0.000128484	electricity, medium voltage
market for electricity, medium voltage	1.96652e-05	remind - SSP2-NPi - 2025	NP	kilowatt hour		technosphere	1.96652e-05	electricity, medium voltage
market for electricity, medium voltage	0.000578056	remind - SSP2-NPi - 2025	AU	kilowatt hour		technosphere	0.000578056	electricity, medium voltage
market for electricity, medium voltage	0.000423819	remind - SSP2-NPi - 2025	MY	kilowatt hour		technosphere	0.000423819	electricity, medium voltage
market for electrode, negative, Ni	5.19114e-06	remind - SSP2-NPi - 2025	GLO	kilogram		technosphere	5.19114e-06	electrode, negative, Ni
market for ferromanganese, high-coal, 74.5% Mn	0.015278	remind - SSP2-NPi - 2025	GLO	kilogram		technosphere	0.015278	ferromanganese, high-coal, 74.5% Mn
market for ferronickel	0.045	remind - SSP2-NPi - 2025	GLO	kilogram		technosphere	0.045	ferronickel
market for ferrosilicon	7.61609e-06	remind - SSP2-NPi - 2025	GLO	kilogram		technosphere	7.61609e-06	ferrosilicon
market for inert waste, for final disposal	-0.000565685	remind - SSP2-NPi - 2025	RoW	kilogram		technosphere	-0.000565685	inert waste, for final disposal
market for iron ore concentrate	0.000622896	remind - SSP2-NPi - 2025	GLO	kilogram		technosphere	0.000622896	iron ore concentrate
market for iron scrap, sorted, pressed	0.198865	remind - SSP2-NPi - 2025	RoW	kilogram		technosphere	0.198865	iron scrap, sorted, pressed
market for lime	0.00230153	remind - SSP2-NPi - 2025	RoW	kilogram		technosphere	0.00230153	lime
market for liquefied petroleum gas	1.06037e-05	remind - SSP2-NPi - 2025	RoW	kilogram		technosphere	1.06037e-05	liquefied petroleum gas
market for manganese	2.03289e-05	remind - SSP2-NPi - 2025	GLO	kilogram		technosphere	2.03289e-05	manganese
market for mill scale	-6.63e-05	remind - SSP2-NPi - 2025	RoW	kilogram		technosphere	-6.63e-05	mill scale
market for molybdenite	0.00059649	remind - SSP2-NPi - 2025	GLO	kilogram		technosphere	0.00059649	molybdenite
market for natural gas, high pressure	0.00120219	remind - SSP2-NPi - 2025	RoW	cubic meter		technosphere	0.00120219	natural gas, high pressure
market for nickel, class 1	5.83731e-07	remind - SSP2-NPi - 2025	GLO	kilogram		technosphere	5.83731e-07	nickel, class 1
market for nitrogen, liquid	0.00162595	remind - SSP2-NPi - 2025	RoW	kilogram		technosphere	0.00162595	nitrogen, liquid
market for oxygen, liquid	0.078054	remind - SSP2-NPi - 2025	World	kilogram		technosphere	0.078054	oxygen, liquid
market for pig iron	0.867945	remind - SSP2-NPi - 2025	World	kilogram		technosphere	0.867945	pig iron
market for propane	1.25241e-05	remind - SSP2-NPi - 2025	GLO	kilogram		technosphere	1.25241e-05	propane
market for quicklime, in pieces, loose	0.044833	remind - SSP2-NPi - 2025	RoW	kilogram		technosphere	0.044833	quicklime, in pieces, loose
market for sponge iron	0.000780486	remind - SSP2-NPi - 2025	GLO	kilogram		technosphere	0.000780486	sponge iron
market for steam, in chemical industry	0.000366647	remind - SSP2-NPi - 2025	RoW	kilogram		technosphere	0.000366647	steam, in chemical industry
market for wastewater from pig iron production	-0.00134164	remind - SSP2-NPi - 2025	RoW	cubic meter		technosphere	-0.00134164	wastewater from pig iron production
market for wastewater from pig iron production	-2.00385e-05	remind - SSP2-NPi - 2025	RoW	cubic meter		technosphere	-2.00385e-05	wastewater from pig iron production
market group for electricity, medium voltage	0.00215756	remind - SSP2-NPi - 2025	RME	kilowatt hour		technosphere	0.00215756	electricity, medium voltage
market group for electricity, medium voltage	0.00380426	remind - SSP2-NPi - 2025	RLA	kilowatt hour		technosphere	0.00380426	electricity, medium voltage
market group for electricity, medium voltage	0.0201787	remind - SSP2-NPi - 2025	CN	kilowatt hour		technosphere	0.0201787	electricity, medium voltage
market group for electricity, medium voltage	0.0121919	remind - SSP2-NPi - 2025	RNA	kilowatt hour		technosphere	0.0121919	electricity, medium voltage
market group for electricity, medium voltage	0.00190922	remind - SSP2-NPi - 2025	RAF	kilowatt hour		technosphere	0.00190922	electricity, medium voltage
Activity	steel production, converter, low-alloyed, 2030
code	bfd975d039134b5c88e684426d0fa6a1
comment	This dataset has been modified by `premise`, according to the performance for steel production indicated by the IAM model REMIND for the IAM region World in 2100, following the scenario SSP1-NDC. The energy efficiency of the process has been improved by 12%."Background: This activity represents the production of primary low-alloyed steel in a basic oxygen furnace (BOF), a discontinuous process in…
location	World
reference product	steel, low-alloyed
scenario	SSP2-NPi
type	process
unit	kilogram
worksheet name	steel_prod_SSP2-NPi
year	2030
Exchanges
name	amount	database	location	unit	categories	type	default_amount	reference product
Carbon dioxide, fossil	0.0626236			kilogram	air	biosphere
Carbon dioxide, non-fossil	2.04331e-05			kilogram	air	biosphere
Carbon monoxide, fossil	0.00168214			kilogram	air	biosphere
Chromium III	2.73861e-08			kilogram	air	biosphere
Copper ion	1.38684e-07			kilogram	air	biosphere
Dioxins, measured as 2,3,7,8-tetrachlorodibenzo-p-dioxin	6.35767e-14			kilogram	air	biosphere
Heat, waste	0.204696			megajoule	air	biosphere
Iron ion	4.115e-05			kilogram	air	biosphere
Lead II	4.08167e-07			kilogram	air	biosphere
Manganese II	6.84105e-07			kilogram	air	biosphere
Nitrogen oxides	2.12368e-05			kilogram	air	biosphere
PAH, polycyclic aromatic hydrocarbons	1e-08			kilogram	air	biosphere
Particulate Matter, < 2.5 um	4.47437e-05			kilogram	air	biosphere
Water	0.00611841			cubic meter	air	biosphere
Water	5.00963e-06			cubic meter	air::non-urban air or from high stacks	biosphere
Water, cooling, unspecified natural origin	0.00577581			cubic meter	natural resource::in water	biosphere
Water, unspecified natural origin	2.50482e-05			cubic meter	natural resource::in water	biosphere
steel production, converter, low-alloyed, 2030	1	steel_prod_SSP2-NPi	World	kilogram		production	1	steel, low-alloyed
blast furnace gas, Recycled Content cut-off	-0.0304027	remind - SSP2-NPi - 2030	GLO	megajoule		technosphere	-0.0304027	blast furnace gas
market for aluminium, wrought alloy	8.78501e-05	remind - SSP2-NPi - 2030	GLO	kilogram		technosphere	8.78501e-05	aluminium, wrought alloy
market for argon, liquid	0.000116964	remind - SSP2-NPi - 2030	RoW	kilogram		technosphere	0.000116964	argon, liquid
market for basic oxygen furnace dust	-0.019396	remind - SSP2-NPi - 2030	RoW	kilogram		technosphere	-0.019396	basic oxygen furnace dust
market for basic oxygen furnace secondary metallurgy slag	-0.0003008	remind - SSP2-NPi - 2030	RoW	kilogram		technosphere	-0.0003008	basic oxygen furnace secondary metallurgy slag
market for basic oxygen furnace slag	-0.104898	remind - SSP2-NPi - 2030	RoW	kilogram		technosphere	-0.104898	basic oxygen furnace slag
market for basic oxygen furnace sludge	-0.0003008	remind - SSP2-NPi - 2030	RoW	kilogram		technosphere	-0.0003008	basic oxygen furnace sludge
market for basic oxygen furnace waste	-0.00335064	remind - SSP2-NPi - 2030	GLO	kilogram		technosphere	-0.00335064	basic oxygen furnace waste
market for blast oxygen furnace converter	1.3333e-11	remind - SSP2-NPi - 2030	GLO	unit		technosphere	1.3333e-11	blast oxygen furnace converter
market for calcium carbide, technical grade	0.000190693	remind - SSP2-NPi - 2030	RoW	kilogram		technosphere	0.000190693	calcium carbide, technical grade
market for coke	0.000183216	remind - SSP2-NPi - 2030	GLO	megajoule		technosphere	0.000183216	coke
market for compressed air, 600 kPa gauge	0.0144222	remind - SSP2-NPi - 2030	RoW	cubic meter		technosphere	0.0144222	compressed air, 600 kPa gauge
market for copper, cathode	7.98637e-07	remind - SSP2-NPi - 2030	GLO	kilogram		technosphere	7.98637e-07	copper, cathode
market for diesel	2.90413e-06	remind - SSP2-NPi - 2030	RoW	kilogram		technosphere	2.90413e-06	diesel
market for dolomite	0.00442218	remind - SSP2-NPi - 2030	RoW	kilogram		technosphere	0.00442218	dolomite
market for electricity, medium voltage	0.000576605	remind - SSP2-NPi - 2030	VN	kilowatt hour		technosphere	0.000576605	electricity, medium voltage
market for electricity, medium voltage	1.27593e-05	remind - SSP2-NPi - 2030	CY	kilowatt hour		technosphere	1.27593e-05	electricity, medium voltage
market for electricity, medium voltage	0.000163672	remind - SSP2-NPi - 2030	UZ	kilowatt hour		technosphere	0.000163672	electricity, medium voltage
market for electricity, medium voltage	4.56929e-05	remind - SSP2-NPi - 2030	TJ	kilowatt hour		technosphere	4.56929e-05	electricity, medium voltage
market for electricity, medium voltage	0.000473443	remind - SSP2-NPi - 2030	ID	kilowatt hour		technosphere	0.000473443	electricity, medium voltage
market for electricity, medium voltage	3.82103e-05	remind - SSP2-NPi - 2030	KG	kilowatt hour		technosphere	3.82103e-05	electricity, medium voltage
market for electricity, medium voltage	0.000297532	remind - SSP2-NPi - 2030	TH	kilowatt hour		technosphere	0.000297532	electricity, medium voltage
market for electricity, medium voltage	0.000261098	remind - SSP2-NPi - 2030	PH	kilowatt hour		technosphere	0.000261098	electricity, medium voltage
market for electricity, medium voltage	4.8956e-06	remind - SSP2-NPi - 2030	QA	kilowatt hour		technosphere	4.8956e-06	electricity, medium voltage
market for electricity, medium voltage	3.00521e-05	remind - SSP2-NPi - 2030	KH	kilowatt hour		technosphere	3.00521e-05	electricity, medium voltage
market for electricity, medium voltage	0.000122021	remind - SSP2-NPi - 2030	SG	kilowatt hour		technosphere	0.000122021	electricity, medium voltage
market for electricity, medium voltage	0.00141139	remind - SSP2-NPi - 2030	KR	kilowatt hour		technosphere	0.00141139	electricity, medium voltage
market for electricity, medium voltage	0.000596764	remind - SSP2-NPi - 2030	TW	kilowatt hour		technosphere	0.000596764	electricity, medium voltage
market for electricity, medium voltage	0.000113291	remind - SSP2-NPi - 2030	NZ	kilowatt hour		technosphere	0.000113291	electricity, medium voltage
market for electricity, medium voltage	3.03323e-05	remind - SSP2-NPi - 2030	GE	kilowatt hour		technosphere	3.03323e-05	electricity, medium voltage
market for electricity, medium voltage	3.67822e-05	remind - SSP2-NPi - 2030	LB	kilowatt hour		technosphere	3.67822e-05	electricity, medium voltage
market for electricity, medium voltage	0.000154597	remind - SSP2-NPi - 2030	IL	kilowatt hour		technosphere	0.000154597	electricity, medium voltage
market for electricity, medium voltage	4.60361e-05	remind - SSP2-NPi - 2030	TM	kilowatt hour		technosphere	4.60361e-05	electricity, medium voltage
market for electricity, medium voltage	5.75519e-05	remind - SSP2-NPi - 2030	MM	kilowatt hour		technosphere	5.75519e-05	electricity, medium voltage
market for electricity, medium voltage	6.44113e-06	remind - SSP2-NPi - 2030	YE	kilowatt hour		technosphere	6.44113e-06	electricity, medium voltage
market for electricity, medium voltage	0.000329828	remind - SSP2-NPi - 2030	PK	kilowatt hour		technosphere	0.000329828	electricity, medium voltage
market for electricity, medium voltage	1.69109e-05	remind - SSP2-NPi - 2030	AM	kilowatt hour		technosphere	1.69109e-05	electricity, medium voltage
market for electricity, medium voltage	5.63004e-05	remind - SSP2-NPi - 2030	AZ	kilowatt hour		technosphere	5.63004e-05	electricity, medium voltage
market for electricity, medium voltage	0.00069025	remind - SSP2-NPi - 2030	TR	kilowatt hour		technosphere	0.00069025	electricity, medium voltage
market for electricity, medium voltage	0.000184784	remind - SSP2-NPi - 2030	BD	kilowatt hour		technosphere	0.000184784	electricity, medium voltage
market for electricity, medium voltage	3.88544e-05	remind - SSP2-NPi - 2030	SY	kilowatt hour		technosphere	3.88544e-05	electricity, medium voltage
market for electricity, medium voltage	4.76386e-05	remind - SSP2-NPi - 2030	BH	kilowatt hour		technosphere	4.76386e-05	electricity, medium voltage
market for electricity, medium voltage	3.85723e-05	remind - SSP2-NPi - 2030	LK	kilowatt hour		technosphere	3.85723e-05	electricity, medium voltage
market for electricity, medium voltage	4.33284e-05	remind - SSP2-NPi - 2030	JO	kilowatt hour		technosphere	4.33284e-05	electricity, medium voltage
market for electricity, medium voltage	0.00225931	remind - SSP2-NPi - 2030	JP	kilowatt hour		technosphere	0.00225931	electricity, medium voltage
market for electricity, medium voltage	3.42881e-05	remind - SSP2-NPi - 2030	KP	kilowatt hour		technosphere	3.42881e-05	electricity, medium voltage
market for electricity, medium voltage	9.95727e-06	remind - SSP2-NPi - 2030	BN	kilowatt hour		technosphere	9.95727e-06	electricity, medium voltage
market for electricity, medium voltage	2.14721e-05	remind - SSP2-NPi - 2030	MN	kilowatt hour		technosphere	2.14721e-05	electricity, medium voltage
market for electricity, medium voltage	9.51554e-05	remind - SSP2-NPi - 2030	OM	kilowatt hour		technosphere	9.51554e-05	electricity, medium voltage
market for electricity, medium voltage	0.000262526	remind - SSP2-NPi - 2030	KZ	kilowatt hour		technosphere	0.000262526	electricity, medium voltage
market for electricity, medium voltage	0.000128484	remind - SSP2-NPi - 2030	HK	kilowatt hour		technosphere	0.000128484	electricity, medium voltage
market for electricity, medium voltage	1.96652e-05	remind - SSP2-NPi - 2030	NP	kilowatt hour		technosphere	1.96652e-05	electricity, medium voltage
market for electricity, medium voltage	0.000578056	remind - SSP2-NPi - 2030	AU	kilowatt hour		technosphere	0.000578056	electricity, medium voltage
market for electricity, medium voltage	0.000423819	remind - SSP2-NPi - 2030	MY	kilowatt hour		technosphere	0.000423819	electricity, medium voltage
market for electrode, negative, Ni	5.19114e-06	remind - SSP2-NPi - 2030	GLO	kilogram		technosphere	5.19114e-06	electrode, negative, Ni
market for ferromanganese, high-coal, 74.5% Mn	0.015278	remind - SSP2-NPi - 2030	GLO	kilogram		technosphere	0.015278	ferromanganese, high-coal, 74.5% Mn
market for ferronickel	0.045	remind - SSP2-NPi - 2030	GLO	kilogram		technosphere	0.045	ferronickel
market for ferrosilicon	7.61609e-06	remind - SSP2-NPi - 2030	GLO	kilogram		technosphere	7.61609e-06	ferrosilicon
market for inert waste, for final disposal	-0.000565685	remind - SSP2-NPi - 2030	RoW	kilogram		technosphere	-0.000565685	inert waste, for final disposal
market for iron ore concentrate	0.000622896	remind - SSP2-NPi - 2030	GLO	kilogram		technosphere	0.000622896	iron ore concentrate
market for iron scrap, sorted, pressed	0.198865	remind - SSP2-NPi - 2030	RoW	kilogram		technosphere	0.198865	iron scrap, sorted, pressed
market for lime	0.00230153	remind - SSP2-NPi - 2030	RoW	kilogram		technosphere	0.00230153	lime
market for liquefied petroleum gas	1.06037e-05	remind - SSP2-NPi - 2030	RoW	kilogram		technosphere	1.06037e-05	liquefied petroleum gas
market for manganese	2.03289e-05	remind - SSP2-NPi - 2030	GLO	kilogram		technosphere	2.03289e-05	manganese
market for mill scale	-6.63e-05	remind - SSP2-NPi - 2030	RoW	kilogram		technosphere	-6.63e-05	mill scale
market for molybdenite	0.00059649	remind - SSP2-NPi - 2030	GLO	kilogram		technosphere	0.00059649	molybdenite
market for natural gas, high pressure	0.00120219	remind - SSP2-NPi - 2030	RoW	cubic meter		technosphere	0.00120219	natural gas, high pressure
market for nickel, class 1	5.83731e-07	remind - SSP2-NPi - 2030	GLO	kilogram		technosphere	5.83731e-07	nickel, class 1
market for nitrogen, liquid	0.00162595	remind - SSP2-NPi - 2030	RoW	kilogram		technosphere	0.00162595	nitrogen, liquid
market for oxygen, liquid	0.078054	remind - SSP2-NPi - 2030	World	kilogram		technosphere	0.078054	oxygen, liquid
market for pig iron	0.867945	remind - SSP2-NPi - 2030	World	kilogram		technosphere	0.867945	pig iron
market for propane	1.25241e-05	remind - SSP2-NPi - 2030	GLO	kilogram		technosphere	1.25241e-05	propane
market for quicklime, in pieces, loose	0.044833	remind - SSP2-NPi - 2030	RoW	kilogram		technosphere	0.044833	quicklime, in pieces, loose
market for sponge iron	0.000780486	remind - SSP2-NPi - 2030	GLO	kilogram		technosphere	0.000780486	sponge iron
market for steam, in chemical industry	0.000366647	remind - SSP2-NPi - 2030	RoW	kilogram		technosphere	0.000366647	steam, in chemical industry
market for wastewater from pig iron production	-0.00134164	remind - SSP2-NPi - 2030	RoW	cubic meter		technosphere	-0.00134164	wastewater from pig iron production
market for wastewater from pig iron production	-2.00385e-05	remind - SSP2-NPi - 2030	RoW	cubic meter		technosphere	-2.00385e-05	wastewater from pig iron production
market group for electricity, medium voltage	0.00215756	remind - SSP2-NPi - 2030	RME	kilowatt hour		technosphere	0.00215756	electricity, medium voltage
market group for electricity, medium voltage	0.00380426	remind - SSP2-NPi - 2030	RLA	kilowatt hour		technosphere	0.00380426	electricity, medium voltage
market group for electricity, medium voltage	0.0201787	remind - SSP2-NPi - 2030	CN	kilowatt hour		technosphere	0.0201787	electricity, medium voltage
market group for electricity, medium voltage	0.0121919	remind - SSP2-NPi - 2030	RNA	kilowatt hour		technosphere	0.0121919	electricity, medium voltage
market group for electricity, medium voltage	0.00190922	remind - SSP2-NPi - 2030	RAF	kilowatt hour		technosphere	0.00190922	electricity, medium voltage
Activity	steel production, converter, low-alloyed, 2035
code	a88e50ce92a6466180a60c1c808b088b
comment	This dataset has been modified by `premise`, according to the performance for steel production indicated by the IAM model REMIND for the IAM region World in 2100, following the scenario SSP1-NDC. The energy efficiency of the process has been improved by 12%."Background: This activity represents the production of primary low-alloyed steel in a basic oxygen furnace (BOF), a discontinuous process in…
location	World
reference product	steel, low-alloyed
scenario	SSP2-NPi
type	process
unit	kilogram
worksheet name	steel_prod_SSP2-NPi
year	2035
Exchanges
name	amount	database	location	unit	categories	type	default_amount	reference product
Carbon dioxide, fossil	0.0626236			kilogram	air	biosphere
Carbon dioxide, non-fossil	2.04331e-05			kilogram	air	biosphere
Carbon monoxide, fossil	0.00168214			kilogram	air	biosphere
Chromium III	2.73861e-08			kilogram	air	biosphere
Copper ion	1.38684e-07			kilogram	air	biosphere
Dioxins, measured as 2,3,7,8-tetrachlorodibenzo-p-dioxin	6.35767e-14			kilogram	air	biosphere
Heat, waste	0.204696			megajoule	air	biosphere
Iron ion	4.115e-05			kilogram	air	biosphere
Lead II	4.08167e-07			kilogram	air	biosphere
Manganese II	6.84105e-07			kilogram	air	biosphere
Nitrogen oxides	2.12368e-05			kilogram	air	biosphere
PAH, polycyclic aromatic hydrocarbons	1e-08			kilogram	air	biosphere
Particulate Matter, < 2.5 um	4.47437e-05			kilogram	air	biosphere
Water	0.00611841			cubic meter	air	biosphere
Water	5.00963e-06			cubic meter	air::non-urban air or from high stacks	biosphere
Water, cooling, unspecified natural origin	0.00577581			cubic meter	natural resource::in water	biosphere
Water, unspecified natural origin	2.50482e-05			cubic meter	natural resource::in water	biosphere
steel production, converter, low-alloyed, 2035	1	steel_prod_SSP2-NPi	World	kilogram		production	1	steel, low-alloyed
blast furnace gas, Recycled Content cut-off	-0.0304027	remind - SSP2-NPi - 2035	GLO	megajoule		technosphere	-0.0304027	blast furnace gas
market for aluminium, wrought alloy	8.78501e-05	remind - SSP2-NPi - 2035	GLO	kilogram		technosphere	8.78501e-05	aluminium, wrought alloy
market for argon, liquid	0.000116964	remind - SSP2-NPi - 2035	RoW	kilogram		technosphere	0.000116964	argon, liquid
market for basic oxygen furnace dust	-0.019396	remind - SSP2-NPi - 2035	RoW	kilogram		technosphere	-0.019396	basic oxygen furnace dust
market for basic oxygen furnace secondary metallurgy slag	-0.0003008	remind - SSP2-NPi - 2035	RoW	kilogram		technosphere	-0.0003008	basic oxygen furnace secondary metallurgy slag
market for basic oxygen furnace slag	-0.104898	remind - SSP2-NPi - 2035	RoW	kilogram		technosphere	-0.104898	basic oxygen furnace slag
market for basic oxygen furnace sludge	-0.0003008	remind - SSP2-NPi - 2035	RoW	kilogram		technosphere	-0.0003008	basic oxygen furnace sludge
market for basic oxygen furnace waste	-0.00335064	remind - SSP2-NPi - 2035	GLO	kilogram		technosphere	-0.00335064	basic oxygen furnace waste
market for blast oxygen furnace converter	1.3333e-11	remind - SSP2-NPi - 2035	GLO	unit		technosphere	1.3333e-11	blast oxygen furnace converter
market for calcium carbide, technical grade	0.000190693	remind - SSP2-NPi - 2035	RoW	kilogram		technosphere	0.000190693	calcium carbide, technical grade
market for coke	0.000183216	remind - SSP2-NPi - 2035	GLO	megajoule		technosphere	0.000183216	coke
market for compressed air, 600 kPa gauge	0.0144222	remind - SSP2-NPi - 2035	RoW	cubic meter		technosphere	0.0144222	compressed air, 600 kPa gauge
market for copper, cathode	7.98637e-07	remind - SSP2-NPi - 2035	GLO	kilogram		technosphere	7.98637e-07	copper, cathode
market for diesel	2.90413e-06	remind - SSP2-NPi - 2035	RoW	kilogram		technosphere	2.90413e-06	diesel
market for dolomite	0.00442218	remind - SSP2-NPi - 2035	RoW	kilogram		technosphere	0.00442218	dolomite
market for electricity, medium voltage	0.000576605	remind - SSP2-NPi - 2035	VN	kilowatt hour		technosphere	0.000576605	electricity, medium voltage
market for electricity, medium voltage	1.27593e-05	remind - SSP2-NPi - 2035	CY	kilowatt hour		technosphere	1.27593e-05	electricity, medium voltage
market for electricity, medium voltage	0.000163672	remind - SSP2-NPi - 2035	UZ	kilowatt hour		technosphere	0.000163672	electricity, medium voltage
market for electricity, medium voltage	4.56929e-05	remind - SSP2-NPi - 2035	TJ	kilowatt hour		technosphere	4.56929e-05	electricity, medium voltage
market for electricity, medium voltage	0.000473443	remind - SSP2-NPi - 2035	ID	kilowatt hour		technosphere	0.000473443	electricity, medium voltage
market for electricity, medium voltage	3.82103e-05	remind - SSP2-NPi - 2035	KG	kilowatt hour		technosphere	3.82103e-05	electricity, medium voltage
market for electricity, medium voltage	0.000297532	remind - SSP2-NPi - 2035	TH	kilowatt hour		technosphere	0.000297532	electricity, medium voltage
market for electricity, medium voltage	0.000261098	remind - SSP2-NPi - 2035	PH	kilowatt hour		technosphere	0.000261098	electricity, medium voltage
market for electricity, medium voltage	4.8956e-06	remind - SSP2-NPi - 2035	QA	kilowatt hour		technosphere	4.8956e-06	electricity, medium voltage
market for electricity, medium voltage	3.00521e-05	remind - SSP2-NPi - 2035	KH	kilowatt hour		technosphere	3.00521e-05	electricity, medium voltage
market for electricity, medium voltage	0.000122021	remind - SSP2-NPi - 2035	SG	kilowatt hour		technosphere	0.000122021	electricity, medium voltage
market for electricity, medium voltage	0.00141139	remind - SSP2-NPi - 2035	KR	kilowatt hour		technosphere	0.00141139	electricity, medium voltage
market for electricity, medium voltage	0.000596764	remind - SSP2-NPi - 2035	TW	kilowatt hour		technosphere	0.000596764	electricity, medium voltage
market for electricity, medium voltage	0.000113291	remind - SSP2-NPi - 2035	NZ	kilowatt hour		technosphere	0.000113291	electricity, medium voltage
market for electricity, medium voltage	3.03323e-05	remind - SSP2-NPi - 2035	GE	kilowatt hour		technosphere	3.03323e-05	electricity, medium voltage
market for electricity, medium voltage	3.67822e-05	remind - SSP2-NPi - 2035	LB	kilowatt hour		technosphere	3.67822e-05	electricity, medium voltage
market for electricity, medium voltage	0.000154597	remind - SSP2-NPi - 2035	IL	kilowatt hour		technosphere	0.000154597	electricity, medium voltage
market for electricity, medium voltage	4.60361e-05	remind - SSP2-NPi - 2035	TM	kilowatt hour		technosphere	4.60361e-05	electricity, medium voltage
market for electricity, medium voltage	5.75519e-05	remind - SSP2-NPi - 2035	MM	kilowatt hour		technosphere	5.75519e-05	electricity, medium voltage
market for electricity, medium voltage	6.44113e-06	remind - SSP2-NPi - 2035	YE	kilowatt hour		technosphere	6.44113e-06	electricity, medium voltage
market for electricity, medium voltage	0.000329828	remind - SSP2-NPi - 2035	PK	kilowatt hour		technosphere	0.000329828	electricity, medium voltage
market for electricity, medium voltage	1.69109e-05	remind - SSP2-NPi - 2035	AM	kilowatt hour		technosphere	1.69109e-05	electricity, medium voltage
market for electricity, medium voltage	5.63004e-05	remind - SSP2-NPi - 2035	AZ	kilowatt hour		technosphere	5.63004e-05	electricity, medium voltage
market for electricity, medium voltage	0.00069025	remind - SSP2-NPi - 2035	TR	kilowatt hour		technosphere	0.00069025	electricity, medium voltage
market for electricity, medium voltage	0.000184784	remind - SSP2-NPi - 2035	BD	kilowatt hour		technosphere	0.000184784	electricity, medium voltage
market for electricity, medium voltage	3.88544e-05	remind - SSP2-NPi - 2035	SY	kilowatt hour		technosphere	3.88544e-05	electricity, medium voltage
market for electricity, medium voltage	4.76386e-05	remind - SSP2-NPi - 2035	BH	kilowatt hour		technosphere	4.76386e-05	electricity, medium voltage
market for electricity, medium voltage	3.85723e-05	remind - SSP2-NPi - 2035	LK	kilowatt hour		technosphere	3.85723e-05	electricity, medium voltage
market for electricity, medium voltage	4.33284e-05	remind - SSP2-NPi - 2035	JO	kilowatt hour		technosphere	4.33284e-05	electricity, medium voltage
market for electricity, medium voltage	0.00225931	remind - SSP2-NPi - 2035	JP	kilowatt hour		technosphere	0.00225931	electricity, medium voltage
market for electricity, medium voltage	3.42881e-05	remind - SSP2-NPi - 2035	KP	kilowatt hour		technosphere	3.42881e-05	electricity, medium voltage
market for electricity, medium voltage	9.95727e-06	remind - SSP2-NPi - 2035	BN	kilowatt hour		technosphere	9.95727e-06	electricity, medium voltage
market for electricity, medium voltage	2.14721e-05	remind - SSP2-NPi - 2035	MN	kilowatt hour		technosphere	2.14721e-05	electricity, medium voltage
market for electricity, medium voltage	9.51554e-05	remind - SSP2-NPi - 2035	OM	kilowatt hour		technosphere	9.51554e-05	electricity, medium voltage
market for electricity, medium voltage	0.000262526	remind - SSP2-NPi - 2035	KZ	kilowatt hour		technosphere	0.000262526	electricity, medium voltage
market for electricity, medium voltage	0.000128484	remind - SSP2-NPi - 2035	HK	kilowatt hour		technosphere	0.000128484	electricity, medium voltage
market for electricity, medium voltage	1.96652e-05	remind - SSP2-NPi - 2035	NP	kilowatt hour		technosphere	1.96652e-05	electricity, medium voltage
market for electricity, medium voltage	0.000578056	remind - SSP2-NPi - 2035	AU	kilowatt hour		technosphere	0.000578056	electricity, medium voltage
market for electricity, medium voltage	0.000423819	remind - SSP2-NPi - 2035	MY	kilowatt hour		technosphere	0.000423819	electricity, medium voltage
market for electrode, negative, Ni	5.19114e-06	remind - SSP2-NPi - 2035	GLO	kilogram		technosphere	5.19114e-06	electrode, negative, Ni
market for ferromanganese, high-coal, 74.5% Mn	0.015278	remind - SSP2-NPi - 2035	GLO	kilogram		technosphere	0.015278	ferromanganese, high-coal, 74.5% Mn
market for ferronickel	0.045	remind - SSP2-NPi - 2035	GLO	kilogram		technosphere	0.045	ferronickel
market for ferrosilicon	7.61609e-06	remind - SSP2-NPi - 2035	GLO	kilogram		technosphere	7.61609e-06	ferrosilicon
market for inert waste, for final disposal	-0.000565685	remind - SSP2-NPi - 2035	RoW	kilogram		technosphere	-0.000565685	inert waste, for final disposal
market for iron ore concentrate	0.000622896	remind - SSP2-NPi - 2035	GLO	kilogram		technosphere	0.000622896	iron ore concentrate
market for iron scrap, sorted, pressed	0.198865	remind - SSP2-NPi - 2035	RoW	kilogram		technosphere	0.198865	iron scrap, sorted, pressed
market for lime	0.00230153	remind - SSP2-NPi - 2035	RoW	kilogram		technosphere	0.00230153	lime
market for liquefied petroleum gas	1.06037e-05	remind - SSP2-NPi - 2035	RoW	kilogram		technosphere	1.06037e-05	liquefied petroleum gas
market for manganese	2.03289e-05	remind - SSP2-NPi - 2035	GLO	kilogram		technosphere	2.03289e-05	manganese
market for mill scale	-6.63e-05	remind - SSP2-NPi - 2035	RoW	kilogram		technosphere	-6.63e-05	mill scale
market for molybdenite	0.00059649	remind - SSP2-NPi - 2035	GLO	kilogram		technosphere	0.00059649	molybdenite
market for natural gas, high pressure	0.00120219	remind - SSP2-NPi - 2035	RoW	cubic meter		technosphere	0.00120219	natural gas, high pressure
market for nickel, class 1	5.83731e-07	remind - SSP2-NPi - 2035	GLO	kilogram		technosphere	5.83731e-07	nickel, class 1
market for nitrogen, liquid	0.00162595	remind - SSP2-NPi - 2035	RoW	kilogram		technosphere	0.00162595	nitrogen, liquid
market for oxygen, liquid	0.078054	remind - SSP2-NPi - 2035	World	kilogram		technosphere	0.078054	oxygen, liquid
market for pig iron	0.867945	remind - SSP2-NPi - 2035	World	kilogram		technosphere	0.867945	pig iron
market for propane	1.25241e-05	remind - SSP2-NPi - 2035	GLO	kilogram		technosphere	1.25241e-05	propane
market for quicklime, in pieces, loose	0.044833	remind - SSP2-NPi - 2035	RoW	kilogram		technosphere	0.044833	quicklime, in pieces, loose
market for sponge iron	0.000780486	remind - SSP2-NPi - 2035	GLO	kilogram		technosphere	0.000780486	sponge iron
market for steam, in chemical industry	0.000366647	remind - SSP2-NPi - 2035	RoW	kilogram		technosphere	0.000366647	steam, in chemical industry
market for wastewater from pig iron production	-0.00134164	remind - SSP2-NPi - 2035	RoW	cubic meter		technosphere	-0.00134164	wastewater from pig iron production
market for wastewater from pig iron production	-2.00385e-05	remind - SSP2-NPi - 2035	RoW	cubic meter		technosphere	-2.00385e-05	wastewater from pig iron production
market group for electricity, medium voltage	0.00215756	remind - SSP2-NPi - 2035	RME	kilowatt hour		technosphere	0.00215756	electricity, medium voltage
market group for electricity, medium voltage	0.00380426	remind - SSP2-NPi - 2035	RLA	kilowatt hour		technosphere	0.00380426	electricity, medium voltage
market group for electricity, medium voltage	0.0201787	remind - SSP2-NPi - 2035	CN	kilowatt hour		technosphere	0.0201787	electricity, medium voltage
market group for electricity, medium voltage	0.0121919	remind - SSP2-NPi - 2035	RNA	kilowatt hour		technosphere	0.0121919	electricity, medium voltage
market group for electricity, medium voltage	0.00190922	remind - SSP2-NPi - 2035	RAF	kilowatt hour		technosphere	0.00190922	electricity, medium voltage
Activity	steel production, converter, low-alloyed, 2040
code	566eebd5e0b749e69581247d5bb3da61
comment	This dataset has been modified by `premise`, according to the performance for steel production indicated by the IAM model REMIND for the IAM region World in 2100, following the scenario SSP1-NDC. The energy efficiency of the process has been improved by 12%."Background: This activity represents the production of primary low-alloyed steel in a basic oxygen furnace (BOF), a discontinuous process in…
location	World
reference product	steel, low-alloyed
scenario	SSP2-NPi
type	process
unit	kilogram
worksheet name	steel_prod_SSP2-NPi
year	2040
Exchanges
name	amount	database	location	unit	categories	type	default_amount	reference product
Carbon dioxide, fossil	0.0626236			kilogram	air	biosphere
Carbon dioxide, non-fossil	2.04331e-05			kilogram	air	biosphere
Carbon monoxide, fossil	0.00168214			kilogram	air	biosphere
Chromium III	2.73861e-08			kilogram	air	biosphere
Copper ion	1.38684e-07			kilogram	air	biosphere
Dioxins, measured as 2,3,7,8-tetrachlorodibenzo-p-dioxin	6.35767e-14			kilogram	air	biosphere
Heat, waste	0.204696			megajoule	air	biosphere
Iron ion	4.115e-05			kilogram	air	biosphere
Lead II	4.08167e-07			kilogram	air	biosphere
Manganese II	6.84105e-07			kilogram	air	biosphere
Nitrogen oxides	2.12368e-05			kilogram	air	biosphere
PAH, polycyclic aromatic hydrocarbons	1e-08			kilogram	air	biosphere
Particulate Matter, < 2.5 um	4.47437e-05			kilogram	air	biosphere
Water	0.00611841			cubic meter	air	biosphere
Water	5.00963e-06			cubic meter	air::non-urban air or from high stacks	biosphere
Water, cooling, unspecified natural origin	0.00577581			cubic meter	natural resource::in water	biosphere
Water, unspecified natural origin	2.50482e-05			cubic meter	natural resource::in water	biosphere
steel production, converter, low-alloyed, 2040	1	steel_prod_SSP2-NPi	World	kilogram		production	1	steel, low-alloyed
blast furnace gas, Recycled Content cut-off	-0.0304027	remind - SSP2-NPi - 2040	GLO	megajoule		technosphere	-0.0304027	blast furnace gas
market for aluminium, wrought alloy	8.78501e-05	remind - SSP2-NPi - 2040	GLO	kilogram		technosphere	8.78501e-05	aluminium, wrought alloy
market for argon, liquid	0.000116964	remind - SSP2-NPi - 2040	RoW	kilogram		technosphere	0.000116964	argon, liquid
market for basic oxygen furnace dust	-0.019396	remind - SSP2-NPi - 2040	RoW	kilogram		technosphere	-0.019396	basic oxygen furnace dust
market for basic oxygen furnace secondary metallurgy slag	-0.0003008	remind - SSP2-NPi - 2040	RoW	kilogram		technosphere	-0.0003008	basic oxygen furnace secondary metallurgy slag
market for basic oxygen furnace slag	-0.104898	remind - SSP2-NPi - 2040	RoW	kilogram		technosphere	-0.104898	basic oxygen furnace slag
market for basic oxygen furnace sludge	-0.0003008	remind - SSP2-NPi - 2040	RoW	kilogram		technosphere	-0.0003008	basic oxygen furnace sludge
market for basic oxygen furnace waste	-0.00335064	remind - SSP2-NPi - 2040	GLO	kilogram		technosphere	-0.00335064	basic oxygen furnace waste
market for blast oxygen furnace converter	1.3333e-11	remind - SSP2-NPi - 2040	GLO	unit		technosphere	1.3333e-11	blast oxygen furnace converter
market for calcium carbide, technical grade	0.000190693	remind - SSP2-NPi - 2040	RoW	kilogram		technosphere	0.000190693	calcium carbide, technical grade
market for coke	0.000183216	remind - SSP2-NPi - 2040	GLO	megajoule		technosphere	0.000183216	coke
market for compressed air, 600 kPa gauge	0.0144222	remind - SSP2-NPi - 2040	RoW	cubic meter		technosphere	0.0144222	compressed air, 600 kPa gauge
market for copper, cathode	7.98637e-07	remind - SSP2-NPi - 2040	GLO	kilogram		technosphere	7.98637e-07	copper, cathode
market for diesel	2.90413e-06	remind - SSP2-NPi - 2040	RoW	kilogram		technosphere	2.90413e-06	diesel
market for dolomite	0.00442218	remind - SSP2-NPi - 2040	RoW	kilogram		technosphere	0.00442218	dolomite
market for electricity, medium voltage	0.000576605	remind - SSP2-NPi - 2040	VN	kilowatt hour		technosphere	0.000576605	electricity, medium voltage
market for electricity, medium voltage	1.27593e-05	remind - SSP2-NPi - 2040	CY	kilowatt hour		technosphere	1.27593e-05	electricity, medium voltage
market for electricity, medium voltage	0.000163672	remind - SSP2-NPi - 2040	UZ	kilowatt hour		technosphere	0.000163672	electricity, medium voltage
market for electricity, medium voltage	4.56929e-05	remind - SSP2-NPi - 2040	TJ	kilowatt hour		technosphere	4.56929e-05	electricity, medium voltage
market for electricity, medium voltage	0.000473443	remind - SSP2-NPi - 2040	ID	kilowatt hour		technosphere	0.000473443	electricity, medium voltage
market for electricity, medium voltage	3.82103e-05	remind - SSP2-NPi - 2040	KG	kilowatt hour		technosphere	3.82103e-05	electricity, medium voltage
market for electricity, medium voltage	0.000297532	remind - SSP2-NPi - 2040	TH	kilowatt hour		technosphere	0.000297532	electricity, medium voltage
market for electricity, medium voltage	0.000261098	remind - SSP2-NPi - 2040	PH	kilowatt hour		technosphere	0.000261098	electricity, medium voltage
market for electricity, medium voltage	4.8956e-06	remind - SSP2-NPi - 2040	QA	kilowatt hour		technosphere	4.8956e-06	electricity, medium voltage
market for electricity, medium voltage	3.00521e-05	remind - SSP2-NPi - 2040	KH	kilowatt hour		technosphere	3.00521e-05	electricity, medium voltage
market for electricity, medium voltage	0.000122021	remind - SSP2-NPi - 2040	SG	kilowatt hour		technosphere	0.000122021	electricity, medium voltage
market for electricity, medium voltage	0.00141139	remind - SSP2-NPi - 2040	KR	kilowatt hour		technosphere	0.00141139	electricity, medium voltage
market for electricity, medium voltage	0.000596764	remind - SSP2-NPi - 2040	TW	kilowatt hour		technosphere	0.000596764	electricity, medium voltage
market for electricity, medium voltage	0.000113291	remind - SSP2-NPi - 2040	NZ	kilowatt hour		technosphere	0.000113291	electricity, medium voltage
market for electricity, medium voltage	3.03323e-05	remind - SSP2-NPi - 2040	GE	kilowatt hour		technosphere	3.03323e-05	electricity, medium voltage
market for electricity, medium voltage	3.67822e-05	remind - SSP2-NPi - 2040	LB	kilowatt hour		technosphere	3.67822e-05	electricity, medium voltage
market for electricity, medium voltage	0.000154597	remind - SSP2-NPi - 2040	IL	kilowatt hour		technosphere	0.000154597	electricity, medium voltage
market for electricity, medium voltage	4.60361e-05	remind - SSP2-NPi - 2040	TM	kilowatt hour		technosphere	4.60361e-05	electricity, medium voltage
market for electricity, medium voltage	5.75519e-05	remind - SSP2-NPi - 2040	MM	kilowatt hour		technosphere	5.75519e-05	electricity, medium voltage
market for electricity, medium voltage	6.44113e-06	remind - SSP2-NPi - 2040	YE	kilowatt hour		technosphere	6.44113e-06	electricity, medium voltage
market for electricity, medium voltage	0.000329828	remind - SSP2-NPi - 2040	PK	kilowatt hour		technosphere	0.000329828	electricity, medium voltage
market for electricity, medium voltage	1.69109e-05	remind - SSP2-NPi - 2040	AM	kilowatt hour		technosphere	1.69109e-05	electricity, medium voltage
market for electricity, medium voltage	5.63004e-05	remind - SSP2-NPi - 2040	AZ	kilowatt hour		technosphere	5.63004e-05	electricity, medium voltage
market for electricity, medium voltage	0.00069025	remind - SSP2-NPi - 2040	TR	kilowatt hour		technosphere	0.00069025	electricity, medium voltage
market for electricity, medium voltage	0.000184784	remind - SSP2-NPi - 2040	BD	kilowatt hour		technosphere	0.000184784	electricity, medium voltage
market for electricity, medium voltage	3.88544e-05	remind - SSP2-NPi - 2040	SY	kilowatt hour		technosphere	3.88544e-05	electricity, medium voltage
market for electricity, medium voltage	4.76386e-05	remind - SSP2-NPi - 2040	BH	kilowatt hour		technosphere	4.76386e-05	electricity, medium voltage
market for electricity, medium voltage	3.85723e-05	remind - SSP2-NPi - 2040	LK	kilowatt hour		technosphere	3.85723e-05	electricity, medium voltage
market for electricity, medium voltage	4.33284e-05	remind - SSP2-NPi - 2040	JO	kilowatt hour		technosphere	4.33284e-05	electricity, medium voltage
market for electricity, medium voltage	0.00225931	remind - SSP2-NPi - 2040	JP	kilowatt hour		technosphere	0.00225931	electricity, medium voltage
market for electricity, medium voltage	3.42881e-05	remind - SSP2-NPi - 2040	KP	kilowatt hour		technosphere	3.42881e-05	electricity, medium voltage
market for electricity, medium voltage	9.95727e-06	remind - SSP2-NPi - 2040	BN	kilowatt hour		technosphere	9.95727e-06	electricity, medium voltage
market for electricity, medium voltage	2.14721e-05	remind - SSP2-NPi - 2040	MN	kilowatt hour		technosphere	2.14721e-05	electricity, medium voltage
market for electricity, medium voltage	9.51554e-05	remind - SSP2-NPi - 2040	OM	kilowatt hour		technosphere	9.51554e-05	electricity, medium voltage
market for electricity, medium voltage	0.000262526	remind - SSP2-NPi - 2040	KZ	kilowatt hour		technosphere	0.000262526	electricity, medium voltage
market for electricity, medium voltage	0.000128484	remind - SSP2-NPi - 2040	HK	kilowatt hour		technosphere	0.000128484	electricity, medium voltage
market for electricity, medium voltage	1.96652e-05	remind - SSP2-NPi - 2040	NP	kilowatt hour		technosphere	1.96652e-05	electricity, medium voltage
market for electricity, medium voltage	0.000578056	remind - SSP2-NPi - 2040	AU	kilowatt hour		technosphere	0.000578056	electricity, medium voltage
market for electricity, medium voltage	0.000423819	remind - SSP2-NPi - 2040	MY	kilowatt hour		technosphere	0.000423819	electricity, medium voltage
market for electrode, negative, Ni	5.19114e-06	remind - SSP2-NPi - 2040	GLO	kilogram		technosphere	5.19114e-06	electrode, negative, Ni
market for ferromanganese, high-coal, 74.5% Mn	0.015278	remind - SSP2-NPi - 2040	GLO	kilogram		technosphere	0.015278	ferromanganese, high-coal, 74.5% Mn
market for ferronickel	0.045	remind - SSP2-NPi - 2040	GLO	kilogram		technosphere	0.045	ferronickel
market for ferrosilicon	7.61609e-06	remind - SSP2-NPi - 2040	GLO	kilogram		technosphere	7.61609e-06	ferrosilicon
market for inert waste, for final disposal	-0.000565685	remind - SSP2-NPi - 2040	RoW	kilogram		technosphere	-0.000565685	inert waste, for final disposal
market for iron ore concentrate	0.000622896	remind - SSP2-NPi - 2040	GLO	kilogram		technosphere	0.000622896	iron ore concentrate
market for iron scrap, sorted, pressed	0.198865	remind - SSP2-NPi - 2040	RoW	kilogram		technosphere	0.198865	iron scrap, sorted, pressed
market for lime	0.00230153	remind - SSP2-NPi - 2040	RoW	kilogram		technosphere	0.00230153	lime
market for liquefied petroleum gas	1.06037e-05	remind - SSP2-NPi - 2040	RoW	kilogram		technosphere	1.06037e-05	liquefied petroleum gas
market for manganese	2.03289e-05	remind - SSP2-NPi - 2040	GLO	kilogram		technosphere	2.03289e-05	manganese
market for mill scale	-6.63e-05	remind - SSP2-NPi - 2040	RoW	kilogram		technosphere	-6.63e-05	mill scale
market for molybdenite	0.00059649	remind - SSP2-NPi - 2040	GLO	kilogram		technosphere	0.00059649	molybdenite
market for natural gas, high pressure	0.00120219	remind - SSP2-NPi - 2040	RoW	cubic meter		technosphere	0.00120219	natural gas, high pressure
market for nickel, class 1	5.83731e-07	remind - SSP2-NPi - 2040	GLO	kilogram		technosphere	5.83731e-07	nickel, class 1
market for nitrogen, liquid	0.00162595	remind - SSP2-NPi - 2040	RoW	kilogram		technosphere	0.00162595	nitrogen, liquid
market for oxygen, liquid	0.078054	remind - SSP2-NPi - 2040	World	kilogram		technosphere	0.078054	oxygen, liquid
market for pig iron	0.867945	remind - SSP2-NPi - 2040	World	kilogram		technosphere	0.867945	pig iron
market for propane	1.25241e-05	remind - SSP2-NPi - 2040	GLO	kilogram		technosphere	1.25241e-05	propane
market for quicklime, in pieces, loose	0.044833	remind - SSP2-NPi - 2040	RoW	kilogram		technosphere	0.044833	quicklime, in pieces, loose
market for sponge iron	0.000780486	remind - SSP2-NPi - 2040	GLO	kilogram		technosphere	0.000780486	sponge iron
market for steam, in chemical industry	0.000366647	remind - SSP2-NPi - 2040	RoW	kilogram		technosphere	0.000366647	steam, in chemical industry
market for wastewater from pig iron production	-0.00134164	remind - SSP2-NPi - 2040	RoW	cubic meter		technosphere	-0.00134164	wastewater from pig iron production
market for wastewater from pig iron production	-2.00385e-05	remind - SSP2-NPi - 2040	RoW	cubic meter		technosphere	-2.00385e-05	wastewater from pig iron production
market group for electricity, medium voltage	0.00215756	remind - SSP2-NPi - 2040	RME	kilowatt hour		technosphere	0.00215756	electricity, medium voltage
market group for electricity, medium voltage	0.00380426	remind - SSP2-NPi - 2040	RLA	kilowatt hour		technosphere	0.00380426	electricity, medium voltage
market group for electricity, medium voltage	0.0201787	remind - SSP2-NPi - 2040	CN	kilowatt hour		technosphere	0.0201787	electricity, medium voltage
market group for electricity, medium voltage	0.0121919	remind - SSP2-NPi - 2040	RNA	kilowatt hour		technosphere	0.0121919	electricity, medium voltage
market group for electricity, medium voltage	0.00190922	remind - SSP2-NPi - 2040	RAF	kilowatt hour		technosphere	0.00190922	electricity, medium voltage
Activity	steel production, converter, low-alloyed, 2045
code	53c2d57febca4876ae0894cc1359eee6
comment	This dataset has been modified by `premise`, according to the performance for steel production indicated by the IAM model REMIND for the IAM region World in 2100, following the scenario SSP1-NDC. The energy efficiency of the process has been improved by 12%."Background: This activity represents the production of primary low-alloyed steel in a basic oxygen furnace (BOF), a discontinuous process in…
location	World
reference product	steel, low-alloyed
scenario	SSP2-NPi
type	process
unit	kilogram
worksheet name	steel_prod_SSP2-NPi
year	2045
Exchanges
name	amount	database	location	unit	categories	type	default_amount	reference product
Carbon dioxide, fossil	0.0626236			kilogram	air	biosphere
Carbon dioxide, non-fossil	2.04331e-05			kilogram	air	biosphere
Carbon monoxide, fossil	0.00168214			kilogram	air	biosphere
Chromium III	2.73861e-08			kilogram	air	biosphere
Copper ion	1.38684e-07			kilogram	air	biosphere
Dioxins, measured as 2,3,7,8-tetrachlorodibenzo-p-dioxin	6.35767e-14			kilogram	air	biosphere
Heat, waste	0.204696			megajoule	air	biosphere
Iron ion	4.115e-05			kilogram	air	biosphere
Lead II	4.08167e-07			kilogram	air	biosphere
Manganese II	6.84105e-07			kilogram	air	biosphere
Nitrogen oxides	2.12368e-05			kilogram	air	biosphere
PAH, polycyclic aromatic hydrocarbons	1e-08			kilogram	air	biosphere
Particulate Matter, < 2.5 um	4.47437e-05			kilogram	air	biosphere
Water	0.00611841			cubic meter	air	biosphere
Water	5.00963e-06			cubic meter	air::non-urban air or from high stacks	biosphere
Water, cooling, unspecified natural origin	0.00577581			cubic meter	natural resource::in water	biosphere
Water, unspecified natural origin	2.50482e-05			cubic meter	natural resource::in water	biosphere
steel production, converter, low-alloyed, 2045	1	steel_prod_SSP2-NPi	World	kilogram		production	1	steel, low-alloyed
blast furnace gas, Recycled Content cut-off	-0.0304027	remind - SSP2-NPi - 2045	GLO	megajoule		technosphere	-0.0304027	blast furnace gas
market for aluminium, wrought alloy	8.78501e-05	remind - SSP2-NPi - 2045	GLO	kilogram		technosphere	8.78501e-05	aluminium, wrought alloy
market for argon, liquid	0.000116964	remind - SSP2-NPi - 2045	RoW	kilogram		technosphere	0.000116964	argon, liquid
market for basic oxygen furnace dust	-0.019396	remind - SSP2-NPi - 2045	RoW	kilogram		technosphere	-0.019396	basic oxygen furnace dust
market for basic oxygen furnace secondary metallurgy slag	-0.0003008	remind - SSP2-NPi - 2045	RoW	kilogram		technosphere	-0.0003008	basic oxygen furnace secondary metallurgy slag
market for basic oxygen furnace slag	-0.104898	remind - SSP2-NPi - 2045	RoW	kilogram		technosphere	-0.104898	basic oxygen furnace slag
market for basic oxygen furnace sludge	-0.0003008	remind - SSP2-NPi - 2045	RoW	kilogram		technosphere	-0.0003008	basic oxygen furnace sludge
market for basic oxygen furnace waste	-0.00335064	remind - SSP2-NPi - 2045	GLO	kilogram		technosphere	-0.00335064	basic oxygen furnace waste
market for blast oxygen furnace converter	1.3333e-11	remind - SSP2-NPi - 2045	GLO	unit		technosphere	1.3333e-11	blast oxygen furnace converter
market for calcium carbide, technical grade	0.000190693	remind - SSP2-NPi - 2045	RoW	kilogram		technosphere	0.000190693	calcium carbide, technical grade
market for coke	0.000183216	remind - SSP2-NPi - 2045	GLO	megajoule		technosphere	0.000183216	coke
market for compressed air, 600 kPa gauge	0.0144222	remind - SSP2-NPi - 2045	RoW	cubic meter		technosphere	0.0144222	compressed air, 600 kPa gauge
market for copper, cathode	7.98637e-07	remind - SSP2-NPi - 2045	GLO	kilogram		technosphere	7.98637e-07	copper, cathode
market for diesel	2.90413e-06	remind - SSP2-NPi - 2045	RoW	kilogram		technosphere	2.90413e-06	diesel
market for dolomite	0.00442218	remind - SSP2-NPi - 2045	RoW	kilogram		technosphere	0.00442218	dolomite
market for electricity, medium voltage	0.000576605	remind - SSP2-NPi - 2045	VN	kilowatt hour		technosphere	0.000576605	electricity, medium voltage
market for electricity, medium voltage	1.27593e-05	remind - SSP2-NPi - 2045	CY	kilowatt hour		technosphere	1.27593e-05	electricity, medium voltage
market for electricity, medium voltage	0.000163672	remind - SSP2-NPi - 2045	UZ	kilowatt hour		technosphere	0.000163672	electricity, medium voltage
market for electricity, medium voltage	4.56929e-05	remind - SSP2-NPi - 2045	TJ	kilowatt hour		technosphere	4.56929e-05	electricity, medium voltage
market for electricity, medium voltage	0.000473443	remind - SSP2-NPi - 2045	ID	kilowatt hour		technosphere	0.000473443	electricity, medium voltage
market for electricity, medium voltage	3.82103e-05	remind - SSP2-NPi - 2045	KG	kilowatt hour		technosphere	3.82103e-05	electricity, medium voltage
market for electricity, medium voltage	0.000297532	remind - SSP2-NPi - 2045	TH	kilowatt hour		technosphere	0.000297532	electricity, medium voltage
market for electricity, medium voltage	0.000261098	remind - SSP2-NPi - 2045	PH	kilowatt hour		technosphere	0.000261098	electricity, medium voltage
market for electricity, medium voltage	4.8956e-06	remind - SSP2-NPi - 2045	QA	kilowatt hour		technosphere	4.8956e-06	electricity, medium voltage
market for electricity, medium voltage	3.00521e-05	remind - SSP2-NPi - 2045	KH	kilowatt hour		technosphere	3.00521e-05	electricity, medium voltage
market for electricity, medium voltage	0.000122021	remind - SSP2-NPi - 2045	SG	kilowatt hour		technosphere	0.000122021	electricity, medium voltage
market for electricity, medium voltage	0.00141139	remind - SSP2-NPi - 2045	KR	kilowatt hour		technosphere	0.00141139	electricity, medium voltage
market for electricity, medium voltage	0.000596764	remind - SSP2-NPi - 2045	TW	kilowatt hour		technosphere	0.000596764	electricity, medium voltage
market for electricity, medium voltage	0.000113291	remind - SSP2-NPi - 2045	NZ	kilowatt hour		technosphere	0.000113291	electricity, medium voltage
market for electricity, medium voltage	3.03323e-05	remind - SSP2-NPi - 2045	GE	kilowatt hour		technosphere	3.03323e-05	electricity, medium voltage
market for electricity, medium voltage	3.67822e-05	remind - SSP2-NPi - 2045	LB	kilowatt hour		technosphere	3.67822e-05	electricity, medium voltage
market for electricity, medium voltage	0.000154597	remind - SSP2-NPi - 2045	IL	kilowatt hour		technosphere	0.000154597	electricity, medium voltage
market for electricity, medium voltage	4.60361e-05	remind - SSP2-NPi - 2045	TM	kilowatt hour		technosphere	4.60361e-05	electricity, medium voltage
market for electricity, medium voltage	5.75519e-05	remind - SSP2-NPi - 2045	MM	kilowatt hour		technosphere	5.75519e-05	electricity, medium voltage
market for electricity, medium voltage	6.44113e-06	remind - SSP2-NPi - 2045	YE	kilowatt hour		technosphere	6.44113e-06	electricity, medium voltage
market for electricity, medium voltage	0.000329828	remind - SSP2-NPi - 2045	PK	kilowatt hour		technosphere	0.000329828	electricity, medium voltage
market for electricity, medium voltage	1.69109e-05	remind - SSP2-NPi - 2045	AM	kilowatt hour		technosphere	1.69109e-05	electricity, medium voltage
market for electricity, medium voltage	5.63004e-05	remind - SSP2-NPi - 2045	AZ	kilowatt hour		technosphere	5.63004e-05	electricity, medium voltage
market for electricity, medium voltage	0.00069025	remind - SSP2-NPi - 2045	TR	kilowatt hour		technosphere	0.00069025	electricity, medium voltage
market for electricity, medium voltage	0.000184784	remind - SSP2-NPi - 2045	BD	kilowatt hour		technosphere	0.000184784	electricity, medium voltage
market for electricity, medium voltage	3.88544e-05	remind - SSP2-NPi - 2045	SY	kilowatt hour		technosphere	3.88544e-05	electricity, medium voltage
market for electricity, medium voltage	4.76386e-05	remind - SSP2-NPi - 2045	BH	kilowatt hour		technosphere	4.76386e-05	electricity, medium voltage
market for electricity, medium voltage	3.85723e-05	remind - SSP2-NPi - 2045	LK	kilowatt hour		technosphere	3.85723e-05	electricity, medium voltage
market for electricity, medium voltage	4.33284e-05	remind - SSP2-NPi - 2045	JO	kilowatt hour		technosphere	4.33284e-05	electricity, medium voltage
market for electricity, medium voltage	0.00225931	remind - SSP2-NPi - 2045	JP	kilowatt hour		technosphere	0.00225931	electricity, medium voltage
market for electricity, medium voltage	3.42881e-05	remind - SSP2-NPi - 2045	KP	kilowatt hour		technosphere	3.42881e-05	electricity, medium voltage
market for electricity, medium voltage	9.95727e-06	remind - SSP2-NPi - 2045	BN	kilowatt hour		technosphere	9.95727e-06	electricity, medium voltage
market for electricity, medium voltage	2.14721e-05	remind - SSP2-NPi - 2045	MN	kilowatt hour		technosphere	2.14721e-05	electricity, medium voltage
market for electricity, medium voltage	9.51554e-05	remind - SSP2-NPi - 2045	OM	kilowatt hour		technosphere	9.51554e-05	electricity, medium voltage
market for electricity, medium voltage	0.000262526	remind - SSP2-NPi - 2045	KZ	kilowatt hour		technosphere	0.000262526	electricity, medium voltage
market for electricity, medium voltage	0.000128484	remind - SSP2-NPi - 2045	HK	kilowatt hour		technosphere	0.000128484	electricity, medium voltage
market for electricity, medium voltage	1.96652e-05	remind - SSP2-NPi - 2045	NP	kilowatt hour		technosphere	1.96652e-05	electricity, medium voltage
market for electricity, medium voltage	0.000578056	remind - SSP2-NPi - 2045	AU	kilowatt hour		technosphere	0.000578056	electricity, medium voltage
market for electricity, medium voltage	0.000423819	remind - SSP2-NPi - 2045	MY	kilowatt hour		technosphere	0.000423819	electricity, medium voltage
market for electrode, negative, Ni	5.19114e-06	remind - SSP2-NPi - 2045	GLO	kilogram		technosphere	5.19114e-06	electrode, negative, Ni
market for ferromanganese, high-coal, 74.5% Mn	0.015278	remind - SSP2-NPi - 2045	GLO	kilogram		technosphere	0.015278	ferromanganese, high-coal, 74.5% Mn
market for ferronickel	0.045	remind - SSP2-NPi - 2045	GLO	kilogram		technosphere	0.045	ferronickel
market for ferrosilicon	7.61609e-06	remind - SSP2-NPi - 2045	GLO	kilogram		technosphere	7.61609e-06	ferrosilicon
market for inert waste, for final disposal	-0.000565685	remind - SSP2-NPi - 2045	RoW	kilogram		technosphere	-0.000565685	inert waste, for final disposal
market for iron ore concentrate	0.000622896	remind - SSP2-NPi - 2045	GLO	kilogram		technosphere	0.000622896	iron ore concentrate
market for iron scrap, sorted, pressed	0.198865	remind - SSP2-NPi - 2045	RoW	kilogram		technosphere	0.198865	iron scrap, sorted, pressed
market for lime	0.00230153	remind - SSP2-NPi - 2045	RoW	kilogram		technosphere	0.00230153	lime
market for liquefied petroleum gas	1.06037e-05	remind - SSP2-NPi - 2045	RoW	kilogram		technosphere	1.06037e-05	liquefied petroleum gas
market for manganese	2.03289e-05	remind - SSP2-NPi - 2045	GLO	kilogram		technosphere	2.03289e-05	manganese
market for mill scale	-6.63e-05	remind - SSP2-NPi - 2045	RoW	kilogram		technosphere	-6.63e-05	mill scale
market for molybdenite	0.00059649	remind - SSP2-NPi - 2045	GLO	kilogram		technosphere	0.00059649	molybdenite
market for natural gas, high pressure	0.00120219	remind - SSP2-NPi - 2045	RoW	cubic meter		technosphere	0.00120219	natural gas, high pressure
market for nickel, class 1	5.83731e-07	remind - SSP2-NPi - 2045	GLO	kilogram		technosphere	5.83731e-07	nickel, class 1
market for nitrogen, liquid	0.00162595	remind - SSP2-NPi - 2045	RoW	kilogram		technosphere	0.00162595	nitrogen, liquid
market for oxygen, liquid	0.078054	remind - SSP2-NPi - 2045	World	kilogram		technosphere	0.078054	oxygen, liquid
market for pig iron	0.867945	remind - SSP2-NPi - 2045	World	kilogram		technosphere	0.867945	pig iron
market for propane	1.25241e-05	remind - SSP2-NPi - 2045	GLO	kilogram		technosphere	1.25241e-05	propane
market for quicklime, in pieces, loose	0.044833	remind - SSP2-NPi - 2045	RoW	kilogram		technosphere	0.044833	quicklime, in pieces, loose
market for sponge iron	0.000780486	remind - SSP2-NPi - 2045	GLO	kilogram		technosphere	0.000780486	sponge iron
market for steam, in chemical industry	0.000366647	remind - SSP2-NPi - 2045	RoW	kilogram		technosphere	0.000366647	steam, in chemical industry
market for wastewater from pig iron production	-0.00134164	remind - SSP2-NPi - 2045	RoW	cubic meter		technosphere	-0.00134164	wastewater from pig iron production
market for wastewater from pig iron production	-2.00385e-05	remind - SSP2-NPi - 2045	RoW	cubic meter		technosphere	-2.00385e-05	wastewater from pig iron production
market group for electricity, medium voltage	0.00215756	remind - SSP2-NPi - 2045	RME	kilowatt hour		technosphere	0.00215756	electricity, medium voltage
market group for electricity, medium voltage	0.00380426	remind - SSP2-NPi - 2045	RLA	kilowatt hour		technosphere	0.00380426	electricity, medium voltage
market group for electricity, medium voltage	0.0201787	remind - SSP2-NPi - 2045	CN	kilowatt hour		technosphere	0.0201787	electricity, medium voltage
market group for electricity, medium voltage	0.0121919	remind - SSP2-NPi - 2045	RNA	kilowatt hour		technosphere	0.0121919	electricity, medium voltage
market group for electricity, medium voltage	0.00190922	remind - SSP2-NPi - 2045	RAF	kilowatt hour		technosphere	0.00190922	electricity, medium voltage
Activity	steel production, converter, low-alloyed, 2050
code	71f50fa2e0eb40afb41611febc79fa2e
comment	This dataset has been modified by `premise`, according to the performance for steel production indicated by the IAM model REMIND for the IAM region World in 2100, following the scenario SSP1-NDC. The energy efficiency of the process has been improved by 12%."Background: This activity represents the production of primary low-alloyed steel in a basic oxygen furnace (BOF), a discontinuous process in…
location	World
reference product	steel, low-alloyed
scenario	SSP2-NPi
type	process
unit	kilogram
worksheet name	steel_prod_SSP2-NPi
year	2050
Exchanges
name	amount	database	location	unit	categories	type	default_amount	reference product
Carbon dioxide, fossil	0.0626236			kilogram	air	biosphere
Carbon dioxide, non-fossil	2.04331e-05			kilogram	air	biosphere
Carbon monoxide, fossil	0.00168214			kilogram	air	biosphere
Chromium III	2.73861e-08			kilogram	air	biosphere
Copper ion	1.38684e-07			kilogram	air	biosphere
Dioxins, measured as 2,3,7,8-tetrachlorodibenzo-p-dioxin	6.35767e-14			kilogram	air	biosphere
Heat, waste	0.204696			megajoule	air	biosphere
Iron ion	4.115e-05			kilogram	air	biosphere
Lead II	4.08167e-07			kilogram	air	biosphere
Manganese II	6.84105e-07			kilogram	air	biosphere
Nitrogen oxides	2.12368e-05			kilogram	air	biosphere
PAH, polycyclic aromatic hydrocarbons	1e-08			kilogram	air	biosphere
Particulate Matter, < 2.5 um	4.47437e-05			kilogram	air	biosphere
Water	0.00611841			cubic meter	air	biosphere
Water	5.00963e-06			cubic meter	air::non-urban air or from high stacks	biosphere
Water, cooling, unspecified natural origin	0.00577581			cubic meter	natural resource::in water	biosphere
Water, unspecified natural origin	2.50482e-05			cubic meter	natural resource::in water	biosphere
steel production, converter, low-alloyed, 2050	1	steel_prod_SSP2-NPi	World	kilogram		production	1	steel, low-alloyed
blast furnace gas, Recycled Content cut-off	-0.0304027	remind - SSP2-NPi - 2050	GLO	megajoule		technosphere	-0.0304027	blast furnace gas
market for aluminium, wrought alloy	8.78501e-05	remind - SSP2-NPi - 2050	GLO	kilogram		technosphere	8.78501e-05	aluminium, wrought alloy
market for argon, liquid	0.000116964	remind - SSP2-NPi - 2050	RoW	kilogram		technosphere	0.000116964	argon, liquid
market for basic oxygen furnace dust	-0.019396	remind - SSP2-NPi - 2050	RoW	kilogram		technosphere	-0.019396	basic oxygen furnace dust
market for basic oxygen furnace secondary metallurgy slag	-0.0003008	remind - SSP2-NPi - 2050	RoW	kilogram		technosphere	-0.0003008	basic oxygen furnace secondary metallurgy slag
market for basic oxygen furnace slag	-0.104898	remind - SSP2-NPi - 2050	RoW	kilogram		technosphere	-0.104898	basic oxygen furnace slag
market for basic oxygen furnace sludge	-0.0003008	remind - SSP2-NPi - 2050	RoW	kilogram		technosphere	-0.0003008	basic oxygen furnace sludge
market for basic oxygen furnace waste	-0.00335064	remind - SSP2-NPi - 2050	GLO	kilogram		technosphere	-0.00335064	basic oxygen furnace waste
market for blast oxygen furnace converter	1.3333e-11	remind - SSP2-NPi - 2050	GLO	unit		technosphere	1.3333e-11	blast oxygen furnace converter
market for calcium carbide, technical grade	0.000190693	remind - SSP2-NPi - 2050	RoW	kilogram		technosphere	0.000190693	calcium carbide, technical grade
market for coke	0.000183216	remind - SSP2-NPi - 2050	GLO	megajoule		technosphere	0.000183216	coke
market for compressed air, 600 kPa gauge	0.0144222	remind - SSP2-NPi - 2050	RoW	cubic meter		technosphere	0.0144222	compressed air, 600 kPa gauge
market for copper, cathode	7.98637e-07	remind - SSP2-NPi - 2050	GLO	kilogram		technosphere	7.98637e-07	copper, cathode
market for diesel	2.90413e-06	remind - SSP2-NPi - 2050	RoW	kilogram		technosphere	2.90413e-06	diesel
market for dolomite	0.00442218	remind - SSP2-NPi - 2050	RoW	kilogram		technosphere	0.00442218	dolomite
market for electricity, medium voltage	0.000576605	remind - SSP2-NPi - 2050	VN	kilowatt hour		technosphere	0.000576605	electricity, medium voltage
market for electricity, medium voltage	1.27593e-05	remind - SSP2-NPi - 2050	CY	kilowatt hour		technosphere	1.27593e-05	electricity, medium voltage
market for electricity, medium voltage	0.000163672	remind - SSP2-NPi - 2050	UZ	kilowatt hour		technosphere	0.000163672	electricity, medium voltage
market for electricity, medium voltage	4.56929e-05	remind - SSP2-NPi - 2050	TJ	kilowatt hour		technosphere	4.56929e-05	electricity, medium voltage
market for electricity, medium voltage	0.000473443	remind - SSP2-NPi - 2050	ID	kilowatt hour		technosphere	0.000473443	electricity, medium voltage
market for electricity, medium voltage	3.82103e-05	remind - SSP2-NPi - 2050	KG	kilowatt hour		technosphere	3.82103e-05	electricity, medium voltage
market for electricity, medium voltage	0.000297532	remind - SSP2-NPi - 2050	TH	kilowatt hour		technosphere	0.000297532	electricity, medium voltage
market for electricity, medium voltage	0.000261098	remind - SSP2-NPi - 2050	PH	kilowatt hour		technosphere	0.000261098	electricity, medium voltage
market for electricity, medium voltage	4.8956e-06	remind - SSP2-NPi - 2050	QA	kilowatt hour		technosphere	4.8956e-06	electricity, medium voltage
market for electricity, medium voltage	3.00521e-05	remind - SSP2-NPi - 2050	KH	kilowatt hour		technosphere	3.00521e-05	electricity, medium voltage
market for electricity, medium voltage	0.000122021	remind - SSP2-NPi - 2050	SG	kilowatt hour		technosphere	0.000122021	electricity, medium voltage
market for electricity, medium voltage	0.00141139	remind - SSP2-NPi - 2050	KR	kilowatt hour		technosphere	0.00141139	electricity, medium voltage
market for electricity, medium voltage	0.000596764	remind - SSP2-NPi - 2050	TW	kilowatt hour		technosphere	0.000596764	electricity, medium voltage
market for electricity, medium voltage	0.000113291	remind - SSP2-NPi - 2050	NZ	kilowatt hour		technosphere	0.000113291	electricity, medium voltage
market for electricity, medium voltage	3.03323e-05	remind - SSP2-NPi - 2050	GE	kilowatt hour		technosphere	3.03323e-05	electricity, medium voltage
market for electricity, medium voltage	3.67822e-05	remind - SSP2-NPi - 2050	LB	kilowatt hour		technosphere	3.67822e-05	electricity, medium voltage
market for electricity, medium voltage	0.000154597	remind - SSP2-NPi - 2050	IL	kilowatt hour		technosphere	0.000154597	electricity, medium voltage
market for electricity, medium voltage	4.60361e-05	remind - SSP2-NPi - 2050	TM	kilowatt hour		technosphere	4.60361e-05	electricity, medium voltage
market for electricity, medium voltage	5.75519e-05	remind - SSP2-NPi - 2050	MM	kilowatt hour		technosphere	5.75519e-05	electricity, medium voltage
market for electricity, medium voltage	6.44113e-06	remind - SSP2-NPi - 2050	YE	kilowatt hour		technosphere	6.44113e-06	electricity, medium voltage
market for electricity, medium voltage	0.000329828	remind - SSP2-NPi - 2050	PK	kilowatt hour		technosphere	0.000329828	electricity, medium voltage
market for electricity, medium voltage	1.69109e-05	remind - SSP2-NPi - 2050	AM	kilowatt hour		technosphere	1.69109e-05	electricity, medium voltage
market for electricity, medium voltage	5.63004e-05	remind - SSP2-NPi - 2050	AZ	kilowatt hour		technosphere	5.63004e-05	electricity, medium voltage
market for electricity, medium voltage	0.00069025	remind - SSP2-NPi - 2050	TR	kilowatt hour		technosphere	0.00069025	electricity, medium voltage
market for electricity, medium voltage	0.000184784	remind - SSP2-NPi - 2050	BD	kilowatt hour		technosphere	0.000184784	electricity, medium voltage
market for electricity, medium voltage	3.88544e-05	remind - SSP2-NPi - 2050	SY	kilowatt hour		technosphere	3.88544e-05	electricity, medium voltage
market for electricity, medium voltage	4.76386e-05	remind - SSP2-NPi - 2050	BH	kilowatt hour		technosphere	4.76386e-05	electricity, medium voltage
market for electricity, medium voltage	3.85723e-05	remind - SSP2-NPi - 2050	LK	kilowatt hour		technosphere	3.85723e-05	electricity, medium voltage
market for electricity, medium voltage	4.33284e-05	remind - SSP2-NPi - 2050	JO	kilowatt hour		technosphere	4.33284e-05	electricity, medium voltage
market for electricity, medium voltage	0.00225931	remind - SSP2-NPi - 2050	JP	kilowatt hour		technosphere	0.00225931	electricity, medium voltage
market for electricity, medium voltage	3.42881e-05	remind - SSP2-NPi - 2050	KP	kilowatt hour		technosphere	3.42881e-05	electricity, medium voltage
market for electricity, medium voltage	9.95727e-06	remind - SSP2-NPi - 2050	BN	kilowatt hour		technosphere	9.95727e-06	electricity, medium voltage
market for electricity, medium voltage	2.14721e-05	remind - SSP2-NPi - 2050	MN	kilowatt hour		technosphere	2.14721e-05	electricity, medium voltage
market for electricity, medium voltage	9.51554e-05	remind - SSP2-NPi - 2050	OM	kilowatt hour		technosphere	9.51554e-05	electricity, medium voltage
market for electricity, medium voltage	0.000262526	remind - SSP2-NPi - 2050	KZ	kilowatt hour		technosphere	0.000262526	electricity, medium voltage
market for electricity, medium voltage	0.000128484	remind - SSP2-NPi - 2050	HK	kilowatt hour		technosphere	0.000128484	electricity, medium voltage
market for electricity, medium voltage	1.96652e-05	remind - SSP2-NPi - 2050	NP	kilowatt hour		technosphere	1.96652e-05	electricity, medium voltage
market for electricity, medium voltage	0.000578056	remind - SSP2-NPi - 2050	AU	kilowatt hour		technosphere	0.000578056	electricity, medium voltage
market for electricity, medium voltage	0.000423819	remind - SSP2-NPi - 2050	MY	kilowatt hour		technosphere	0.000423819	electricity, medium voltage
market for electrode, negative, Ni	5.19114e-06	remind - SSP2-NPi - 2050	GLO	kilogram		technosphere	5.19114e-06	electrode, negative, Ni
market for ferromanganese, high-coal, 74.5% Mn	0.015278	remind - SSP2-NPi - 2050	GLO	kilogram		technosphere	0.015278	ferromanganese, high-coal, 74.5% Mn
market for ferronickel	0.045	remind - SSP2-NPi - 2050	GLO	kilogram		technosphere	0.045	ferronickel
market for ferrosilicon	7.61609e-06	remind - SSP2-NPi - 2050	GLO	kilogram		technosphere	7.61609e-06	ferrosilicon
market for inert waste, for final disposal	-0.000565685	remind - SSP2-NPi - 2050	RoW	kilogram		technosphere	-0.000565685	inert waste, for final disposal
market for iron ore concentrate	0.000622896	remind - SSP2-NPi - 2050	GLO	kilogram		technosphere	0.000622896	iron ore concentrate
market for iron scrap, sorted, pressed	0.198865	remind - SSP2-NPi - 2050	RoW	kilogram		technosphere	0.198865	iron scrap, sorted, pressed
market for lime	0.00230153	remind - SSP2-NPi - 2050	RoW	kilogram		technosphere	0.00230153	lime
market for liquefied petroleum gas	1.06037e-05	remind - SSP2-NPi - 2050	RoW	kilogram		technosphere	1.06037e-05	liquefied petroleum gas
market for manganese	2.03289e-05	remind - SSP2-NPi - 2050	GLO	kilogram		technosphere	2.03289e-05	manganese
market for mill scale	-6.63e-05	remind - SSP2-NPi - 2050	RoW	kilogram		technosphere	-6.63e-05	mill scale
market for molybdenite	0.00059649	remind - SSP2-NPi - 2050	GLO	kilogram		technosphere	0.00059649	molybdenite
market for natural gas, high pressure	0.00120219	remind - SSP2-NPi - 2050	RoW	cubic meter		technosphere	0.00120219	natural gas, high pressure
market for nickel, class 1	5.83731e-07	remind - SSP2-NPi - 2050	GLO	kilogram		technosphere	5.83731e-07	nickel, class 1
market for nitrogen, liquid	0.00162595	remind - SSP2-NPi - 2050	RoW	kilogram		technosphere	0.00162595	nitrogen, liquid
market for oxygen, liquid	0.078054	remind - SSP2-NPi - 2050	World	kilogram		technosphere	0.078054	oxygen, liquid
market for pig iron	0.867945	remind - SSP2-NPi - 2050	World	kilogram		technosphere	0.867945	pig iron
market for propane	1.25241e-05	remind - SSP2-NPi - 2050	GLO	kilogram		technosphere	1.25241e-05	propane
market for quicklime, in pieces, loose	0.044833	remind - SSP2-NPi - 2050	RoW	kilogram		technosphere	0.044833	quicklime, in pieces, loose
market for sponge iron	0.000780486	remind - SSP2-NPi - 2050	GLO	kilogram		technosphere	0.000780486	sponge iron
market for steam, in chemical industry	0.000366647	remind - SSP2-NPi - 2050	RoW	kilogram		technosphere	0.000366647	steam, in chemical industry
market for wastewater from pig iron production	-0.00134164	remind - SSP2-NPi - 2050	RoW	cubic meter		technosphere	-0.00134164	wastewater from pig iron production
market for wastewater from pig iron production	-2.00385e-05	remind - SSP2-NPi - 2050	RoW	cubic meter		technosphere	-2.00385e-05	wastewater from pig iron production
market group for electricity, medium voltage	0.00215756	remind - SSP2-NPi - 2050	RME	kilowatt hour		technosphere	0.00215756	electricity, medium voltage
market group for electricity, medium voltage	0.00380426	remind - SSP2-NPi - 2050	RLA	kilowatt hour		technosphere	0.00380426	electricity, medium voltage
market group for electricity, medium voltage	0.0201787	remind - SSP2-NPi - 2050	CN	kilowatt hour		technosphere	0.0201787	electricity, medium voltage
market group for electricity, medium voltage	0.0121919	remind - SSP2-NPi - 2050	RNA	kilowatt hour		technosphere	0.0121919	electricity, medium voltage
market group for electricity, medium voltage	0.00190922	remind - SSP2-NPi - 2050	RAF	kilowatt hour		technosphere	0.00190922	electricity, medium voltage
Activity	steel production, electric, chromium steel 18/8, optimistic, 2025
code	63a6ef3a2a3c4efc914803bad3db9f11
comment	This dataset has been modified by `premise`, according to the performance for steel production indicated by the IAM model REMIND for the IAM region World in 2100, following the scenario SSP1-NDC. The energy efficiency of the process has been improved by 28%.Background: This activity represents the production of stainless steel (Type 304, aka. 18/8; assumed composition 68.6% Fe, 9.3% Ni, 19.0% Cr …
location	World
reference product	steel, chromium steel 18/8
scenario	SSP2-NPi
type	process
unit	kilogram
worksheet name	steel_prod_SSP2-NPi
year	2025
Exchanges
name	amount	database	location	unit	categories	type	default_amount	reference product
Benzene	3.63318e-07			kilogram	air	biosphere
Benzene, hexachloro-	1.54919e-09			kilogram	air	biosphere
Cadmium II	1.21655e-08			kilogram	air	biosphere
Carbon dioxide, fossil	0.033168			kilogram	air	biosphere
Carbon dioxide, non-fossil	9.475e-05			kilogram	air	biosphere
Carbon monoxide, fossil	0.000474342			kilogram	air	biosphere
Chromium III	1.83303e-07			kilogram	air	biosphere
Copper ion	7.48999e-08			kilogram	air	biosphere
Dioxins, measured as 2,3,7,8-tetrachlorodibenzo-p-dioxin	4.89898e-13			kilogram	air	biosphere
Hydrocarbons, aromatic	7.7008e-05			kilogram	air	biosphere
Hydrochloric acid	5.31037e-06			kilogram	air	biosphere
Hydrogen fluoride	2.44949e-08			kilogram	air	biosphere
Lead II	4.62331e-07			kilogram	air	biosphere
Mercury II	2e-08			kilogram	air	biosphere
Nickel II	7.74597e-08			kilogram	air	biosphere
Nitrogen oxides	7.73305e-05			kilogram	air	biosphere
PAH, polycyclic aromatic hydrocarbons	9.34345e-08			kilogram	air	biosphere
Particulate Matter, < 2.5 um	1.47224e-05			kilogram	air	biosphere
Particulate Matter, > 10 um	5.19615e-06			kilogram	air	biosphere
Particulate Matter, > 2.5 um and < 10um	1.47224e-05			kilogram	air	biosphere
Polychlorinated biphenyls	2.23607e-10			kilogram	air	biosphere
Sulfur dioxide	3.24037e-05			kilogram	air	biosphere
Water	0.0022952			cubic meter	water	biosphere
Water	0.00292117			cubic meter	air	biosphere
Water, cooling, unspecified natural origin	0.00654217			cubic meter	natural resource::in water	biosphere
Zinc II	2.19089e-06			kilogram	air	biosphere
steel production, electric, chromium steel 18/8, optimistic, 2025	1	steel_prod_SSP2-NPi	World	kilogram		production	1	steel, chromium steel 18/8
market for anode, for metal electrolysis	0.004	remind - SSP2-NPi - 2025	GLO	kilogram		technosphere	0.004	anode, for metal electrolysis
market for argon, liquid	0.032	remind - SSP2-NPi - 2025	RoW	kilogram		technosphere	0.032	argon, liquid
market for electric arc furnace converter	4e-11	remind - SSP2-NPi - 2025	GLO	unit		technosphere	4e-11	electric arc furnace converter
market for electric arc furnace dust	0	remind - SSP2-NPi - 2025	RoW	kilogram		technosphere	0	electric arc furnace dust
market for electric arc furnace secondary metallurgy slag	0	remind - SSP2-NPi - 2025	RoW	kilogram		technosphere	0	electric arc furnace secondary metallurgy slag
market for electric arc furnace slag	0	remind - SSP2-NPi - 2025	RoW	kilogram		technosphere	0	electric arc furnace slag
market for electricity, medium voltage	0.000998198	remind - SSP2-NPi - 2025	NZ	kilowatt hour		technosphere	0.000998198	electricity, medium voltage
market for electricity, medium voltage	0.00509321	remind - SSP2-NPi - 2025	AU	kilowatt hour		technosphere	0.00509321	electricity, medium voltage
market for ferrochromium, high-carbon, 68% Cr	0	remind - SSP2-NPi - 2025	GLO	kilogram		technosphere	0	ferrochromium, high-carbon, 68% Cr
market for ferronickel	0	remind - SSP2-NPi - 2025	GLO	kilogram		technosphere	0	ferronickel
market for hard coal	0.00691265	remind - SSP2-NPi - 2025	RoW	kilogram		technosphere	0.00691265	hard coal
market for hot rolling, steel	1	remind - SSP2-NPi - 2025	GLO	kilogram		technosphere	1	hot rolling, steel
market for inert waste, for final disposal	-0.00678233	remind - SSP2-NPi - 2025	RoW	kilogram		technosphere	-0.00678233	inert waste, for final disposal
market for iron scrap, sorted, pressed	0	remind - SSP2-NPi - 2025	RoW	kilogram		technosphere	0	iron scrap, sorted, pressed
market for natural gas, high pressure	0.00564357	remind - SSP2-NPi - 2025	RoW	cubic meter		technosphere	0.00564357	natural gas, high pressure
market for nitrogen, liquid	0.00359723	remind - SSP2-NPi - 2025	RoW	kilogram		technosphere	0.00359723	nitrogen, liquid
market for oxygen, liquid	0.036	remind - SSP2-NPi - 2025	World	kilogram		technosphere	0.036	oxygen, liquid
market for quicklime, in pieces, loose	0.0591608	remind - SSP2-NPi - 2025	RoW	kilogram		technosphere	0.0591608	quicklime, in pieces, loose
market for refractory, basic, packed	0.0154919	remind - SSP2-NPi - 2025	GLO	kilogram		technosphere	0.0154919	refractory, basic, packed
market group for electricity, medium voltage	0.0335191	remind - SSP2-NPi - 2025	RLA	kilowatt hour		technosphere	0.0335191	electricity, medium voltage
market group for electricity, medium voltage	0.107422	remind - SSP2-NPi - 2025	RNA	kilowatt hour		technosphere	0.107422	electricity, medium voltage
market group for electricity, medium voltage	0.016822	remind - SSP2-NPi - 2025	RAF	kilowatt hour		technosphere	0.016822	electricity, medium voltage
market group for electricity, medium voltage	0.30754	remind - SSP2-NPi - 2025	RAS	kilowatt hour		technosphere	0.30754	electricity, medium voltage
preperation for recycling, steel scrap, from fossil infrastructure, 2025	1.1355	steel_prod_SSP2-NPi	GLO	kilogram		technosphere	1.1355	steel scrap, from fossil infrastructure
treatment of electric arc furnace dust, residual material landfill, optimistic, 2025	-0.0191274	steel_prod_SSP2-NPi	RoW	kilogram		technosphere	-0.0191274	electric arc furnace dust
treatment of electric arc furnace slag, residual material landfill, optimistic, 2025	-0.165106	steel_prod_SSP2-NPi	GLO	kilogram		technosphere	-0.165106	electric arc furnace slag
Activity	steel production, electric, chromium steel 18/8, optimistic, 2030
code	124df17435da4d71a784e081b80ba0c5
comment	This dataset has been modified by `premise`, according to the performance for steel production indicated by the IAM model REMIND for the IAM region World in 2100, following the scenario SSP1-NDC. The energy efficiency of the process has been improved by 28%.Background: This activity represents the production of stainless steel (Type 304, aka. 18/8; assumed composition 68.6% Fe, 9.3% Ni, 19.0% Cr …
location	World
reference product	steel, chromium steel 18/8
scenario	SSP2-NPi
type	process
unit	kilogram
worksheet name	steel_prod_SSP2-NPi
year	2030
Exchanges
name	amount	database	location	unit	categories	type	default_amount	reference product
Benzene	3.63318e-07			kilogram	air	biosphere
Benzene, hexachloro-	1.54919e-09			kilogram	air	biosphere
Cadmium II	1.21655e-08			kilogram	air	biosphere
Carbon dioxide, fossil	0.033168			kilogram	air	biosphere
Carbon dioxide, non-fossil	9.475e-05			kilogram	air	biosphere
Carbon monoxide, fossil	0.000474342			kilogram	air	biosphere
Chromium III	1.83303e-07			kilogram	air	biosphere
Copper ion	7.48999e-08			kilogram	air	biosphere
Dioxins, measured as 2,3,7,8-tetrachlorodibenzo-p-dioxin	4.89898e-13			kilogram	air	biosphere
Hydrocarbons, aromatic	7.7008e-05			kilogram	air	biosphere
Hydrochloric acid	5.31037e-06			kilogram	air	biosphere
Hydrogen fluoride	2.44949e-08			kilogram	air	biosphere
Lead II	4.62331e-07			kilogram	air	biosphere
Mercury II	2e-08			kilogram	air	biosphere
Nickel II	7.74597e-08			kilogram	air	biosphere
Nitrogen oxides	7.73305e-05			kilogram	air	biosphere
PAH, polycyclic aromatic hydrocarbons	9.34345e-08			kilogram	air	biosphere
Particulate Matter, < 2.5 um	1.47224e-05			kilogram	air	biosphere
Particulate Matter, > 10 um	5.19615e-06			kilogram	air	biosphere
Particulate Matter, > 2.5 um and < 10um	1.47224e-05			kilogram	air	biosphere
Polychlorinated biphenyls	2.23607e-10			kilogram	air	biosphere
Sulfur dioxide	3.24037e-05			kilogram	air	biosphere
Water	0.0022952			cubic meter	water	biosphere
Water	0.00292117			cubic meter	air	biosphere
Water, cooling, unspecified natural origin	0.00654217			cubic meter	natural resource::in water	biosphere
Zinc II	2.19089e-06			kilogram	air	biosphere
steel production, electric, chromium steel 18/8, optimistic, 2030	1	steel_prod_SSP2-NPi	World	kilogram		production	1	steel, chromium steel 18/8
market for anode, for metal electrolysis	0.004	remind - SSP2-NPi - 2030	GLO	kilogram		technosphere	0.004	anode, for metal electrolysis
market for argon, liquid	0.032	remind - SSP2-NPi - 2030	RoW	kilogram		technosphere	0.032	argon, liquid
market for electric arc furnace converter	4e-11	remind - SSP2-NPi - 2030	GLO	unit		technosphere	4e-11	electric arc furnace converter
market for electric arc furnace dust	0	remind - SSP2-NPi - 2030	RoW	kilogram		technosphere	0	electric arc furnace dust
market for electric arc furnace secondary metallurgy slag	0	remind - SSP2-NPi - 2030	RoW	kilogram		technosphere	0	electric arc furnace secondary metallurgy slag
market for electric arc furnace slag	0	remind - SSP2-NPi - 2030	RoW	kilogram		technosphere	0	electric arc furnace slag
market for electricity, medium voltage	0.000998198	remind - SSP2-NPi - 2030	NZ	kilowatt hour		technosphere	0.000998198	electricity, medium voltage
market for electricity, medium voltage	0.00509321	remind - SSP2-NPi - 2030	AU	kilowatt hour		technosphere	0.00509321	electricity, medium voltage
market for ferrochromium, high-carbon, 68% Cr	0	remind - SSP2-NPi - 2030	GLO	kilogram		technosphere	0	ferrochromium, high-carbon, 68% Cr
market for ferronickel	0	remind - SSP2-NPi - 2030	GLO	kilogram		technosphere	0	ferronickel
market for hard coal	0.00691265	remind - SSP2-NPi - 2030	RoW	kilogram		technosphere	0.00691265	hard coal
market for hot rolling, steel	1	remind - SSP2-NPi - 2030	GLO	kilogram		technosphere	1	hot rolling, steel
market for inert waste, for final disposal	-0.00678233	remind - SSP2-NPi - 2030	RoW	kilogram		technosphere	-0.00678233	inert waste, for final disposal
market for iron scrap, sorted, pressed	0	remind - SSP2-NPi - 2030	RoW	kilogram		technosphere	0	iron scrap, sorted, pressed
market for natural gas, high pressure	0.00564357	remind - SSP2-NPi - 2030	RoW	cubic meter		technosphere	0.00564357	natural gas, high pressure
market for nitrogen, liquid	0.00359723	remind - SSP2-NPi - 2030	RoW	kilogram		technosphere	0.00359723	nitrogen, liquid
market for oxygen, liquid	0.036	remind - SSP2-NPi - 2030	World	kilogram		technosphere	0.036	oxygen, liquid
market for quicklime, in pieces, loose	0.0591608	remind - SSP2-NPi - 2030	RoW	kilogram		technosphere	0.0591608	quicklime, in pieces, loose
market for refractory, basic, packed	0.0154919	remind - SSP2-NPi - 2030	GLO	kilogram		technosphere	0.0154919	refractory, basic, packed
market group for electricity, medium voltage	0.0335191	remind - SSP2-NPi - 2030	RLA	kilowatt hour		technosphere	0.0335191	electricity, medium voltage
market group for electricity, medium voltage	0.107422	remind - SSP2-NPi - 2030	RNA	kilowatt hour		technosphere	0.107422	electricity, medium voltage
market group for electricity, medium voltage	0.016822	remind - SSP2-NPi - 2030	RAF	kilowatt hour		technosphere	0.016822	electricity, medium voltage
market group for electricity, medium voltage	0.30754	remind - SSP2-NPi - 2030	RAS	kilowatt hour		technosphere	0.30754	electricity, medium voltage
preperation for recycling, steel scrap, from fossil infrastructure, 2030	1.1355	steel_prod_SSP2-NPi	GLO	kilogram		technosphere	1.1355	steel scrap, from fossil infrastructure
treatment of electric arc furnace dust, residual material landfill, optimistic, 2030	-0.0191274	steel_prod_SSP2-NPi	RoW	kilogram		technosphere	-0.0191274	electric arc furnace dust
treatment of electric arc furnace slag, residual material landfill, optimistic, 2030	-0.165106	steel_prod_SSP2-NPi	GLO	kilogram		technosphere	-0.165106	electric arc furnace slag
Activity	steel production, electric, chromium steel 18/8, optimistic, 2035
code	db195973579e4ca0b04a22c1f1ff221f
comment	This dataset has been modified by `premise`, according to the performance for steel production indicated by the IAM model REMIND for the IAM region World in 2100, following the scenario SSP1-NDC. The energy efficiency of the process has been improved by 28%.Background: This activity represents the production of stainless steel (Type 304, aka. 18/8; assumed composition 68.6% Fe, 9.3% Ni, 19.0% Cr …
location	World
reference product	steel, chromium steel 18/8
scenario	SSP2-NPi
type	process
unit	kilogram
worksheet name	steel_prod_SSP2-NPi
year	2035
Exchanges
name	amount	database	location	unit	categories	type	default_amount	reference product
Benzene	3.63318e-07			kilogram	air	biosphere
Benzene, hexachloro-	1.54919e-09			kilogram	air	biosphere
Cadmium II	1.21655e-08			kilogram	air	biosphere
Carbon dioxide, fossil	0.033168			kilogram	air	biosphere
Carbon dioxide, non-fossil	9.475e-05			kilogram	air	biosphere
Carbon monoxide, fossil	0.000474342			kilogram	air	biosphere
Chromium III	1.83303e-07			kilogram	air	biosphere
Copper ion	7.48999e-08			kilogram	air	biosphere
Dioxins, measured as 2,3,7,8-tetrachlorodibenzo-p-dioxin	4.89898e-13			kilogram	air	biosphere
Hydrocarbons, aromatic	7.7008e-05			kilogram	air	biosphere
Hydrochloric acid	5.31037e-06			kilogram	air	biosphere
Hydrogen fluoride	2.44949e-08			kilogram	air	biosphere
Lead II	4.62331e-07			kilogram	air	biosphere
Mercury II	2e-08			kilogram	air	biosphere
Nickel II	7.74597e-08			kilogram	air	biosphere
Nitrogen oxides	7.73305e-05			kilogram	air	biosphere
PAH, polycyclic aromatic hydrocarbons	9.34345e-08			kilogram	air	biosphere
Particulate Matter, < 2.5 um	1.47224e-05			kilogram	air	biosphere
Particulate Matter, > 10 um	5.19615e-06			kilogram	air	biosphere
Particulate Matter, > 2.5 um and < 10um	1.47224e-05			kilogram	air	biosphere
Polychlorinated biphenyls	2.23607e-10			kilogram	air	biosphere
Sulfur dioxide	3.24037e-05			kilogram	air	biosphere
Water	0.0022952			cubic meter	water	biosphere
Water	0.00292117			cubic meter	air	biosphere
Water, cooling, unspecified natural origin	0.00654217			cubic meter	natural resource::in water	biosphere
Zinc II	2.19089e-06			kilogram	air	biosphere
steel production, electric, chromium steel 18/8, optimistic, 2035	1	steel_prod_SSP2-NPi	World	kilogram		production	1	steel, chromium steel 18/8
market for anode, for metal electrolysis	0.004	remind - SSP2-NPi - 2035	GLO	kilogram		technosphere	0.004	anode, for metal electrolysis
market for argon, liquid	0.032	remind - SSP2-NPi - 2035	RoW	kilogram		technosphere	0.032	argon, liquid
market for electric arc furnace converter	4e-11	remind - SSP2-NPi - 2035	GLO	unit		technosphere	4e-11	electric arc furnace converter
market for electric arc furnace dust	0	remind - SSP2-NPi - 2035	RoW	kilogram		technosphere	0	electric arc furnace dust
market for electric arc furnace secondary metallurgy slag	0	remind - SSP2-NPi - 2035	RoW	kilogram		technosphere	0	electric arc furnace secondary metallurgy slag
market for electric arc furnace slag	0	remind - SSP2-NPi - 2035	RoW	kilogram		technosphere	0	electric arc furnace slag
market for electricity, medium voltage	0.000998198	remind - SSP2-NPi - 2035	NZ	kilowatt hour		technosphere	0.000998198	electricity, medium voltage
market for electricity, medium voltage	0.00509321	remind - SSP2-NPi - 2035	AU	kilowatt hour		technosphere	0.00509321	electricity, medium voltage
market for ferrochromium, high-carbon, 68% Cr	0	remind - SSP2-NPi - 2035	GLO	kilogram		technosphere	0	ferrochromium, high-carbon, 68% Cr
market for ferronickel	0	remind - SSP2-NPi - 2035	GLO	kilogram		technosphere	0	ferronickel
market for hard coal	0.00691265	remind - SSP2-NPi - 2035	RoW	kilogram		technosphere	0.00691265	hard coal
market for hot rolling, steel	1	remind - SSP2-NPi - 2035	GLO	kilogram		technosphere	1	hot rolling, steel
market for inert waste, for final disposal	-0.00678233	remind - SSP2-NPi - 2035	RoW	kilogram		technosphere	-0.00678233	inert waste, for final disposal
market for iron scrap, sorted, pressed	0	remind - SSP2-NPi - 2035	RoW	kilogram		technosphere	0	iron scrap, sorted, pressed
market for natural gas, high pressure	0.00564357	remind - SSP2-NPi - 2035	RoW	cubic meter		technosphere	0.00564357	natural gas, high pressure
market for nitrogen, liquid	0.00359723	remind - SSP2-NPi - 2035	RoW	kilogram		technosphere	0.00359723	nitrogen, liquid
market for oxygen, liquid	0.036	remind - SSP2-NPi - 2035	World	kilogram		technosphere	0.036	oxygen, liquid
market for quicklime, in pieces, loose	0.0591608	remind - SSP2-NPi - 2035	RoW	kilogram		technosphere	0.0591608	quicklime, in pieces, loose
market for refractory, basic, packed	0.0154919	remind - SSP2-NPi - 2035	GLO	kilogram		technosphere	0.0154919	refractory, basic, packed
market group for electricity, medium voltage	0.0335191	remind - SSP2-NPi - 2035	RLA	kilowatt hour		technosphere	0.0335191	electricity, medium voltage
market group for electricity, medium voltage	0.107422	remind - SSP2-NPi - 2035	RNA	kilowatt hour		technosphere	0.107422	electricity, medium voltage
market group for electricity, medium voltage	0.016822	remind - SSP2-NPi - 2035	RAF	kilowatt hour		technosphere	0.016822	electricity, medium voltage
market group for electricity, medium voltage	0.30754	remind - SSP2-NPi - 2035	RAS	kilowatt hour		technosphere	0.30754	electricity, medium voltage
preperation for recycling, steel scrap, from fossil infrastructure, 2035	1.1355	steel_prod_SSP2-NPi	GLO	kilogram		technosphere	1.1355	steel scrap, from fossil infrastructure
treatment of electric arc furnace dust, residual material landfill, optimistic, 2035	-0.0191274	steel_prod_SSP2-NPi	RoW	kilogram		technosphere	-0.0191274	electric arc furnace dust
treatment of electric arc furnace slag, residual material landfill, optimistic, 2035	-0.165106	steel_prod_SSP2-NPi	GLO	kilogram		technosphere	-0.165106	electric arc furnace slag
Activity	steel production, electric, chromium steel 18/8, optimistic, 2040
code	1516501b1df345699e1f796173fc710c
comment	This dataset has been modified by `premise`, according to the performance for steel production indicated by the IAM model REMIND for the IAM region World in 2100, following the scenario SSP1-NDC. The energy efficiency of the process has been improved by 28%.Background: This activity represents the production of stainless steel (Type 304, aka. 18/8; assumed composition 68.6% Fe, 9.3% Ni, 19.0% Cr …
location	World
reference product	steel, chromium steel 18/8
scenario	SSP2-NPi
type	process
unit	kilogram
worksheet name	steel_prod_SSP2-NPi
year	2040
Exchanges
name	amount	database	location	unit	categories	type	default_amount	reference product
Benzene	3.63318e-07			kilogram	air	biosphere
Benzene, hexachloro-	1.54919e-09			kilogram	air	biosphere
Cadmium II	1.21655e-08			kilogram	air	biosphere
Carbon dioxide, fossil	0.033168			kilogram	air	biosphere
Carbon dioxide, non-fossil	9.475e-05			kilogram	air	biosphere
Carbon monoxide, fossil	0.000474342			kilogram	air	biosphere
Chromium III	1.83303e-07			kilogram	air	biosphere
Copper ion	7.48999e-08			kilogram	air	biosphere
Dioxins, measured as 2,3,7,8-tetrachlorodibenzo-p-dioxin	4.89898e-13			kilogram	air	biosphere
Hydrocarbons, aromatic	7.7008e-05			kilogram	air	biosphere
Hydrochloric acid	5.31037e-06			kilogram	air	biosphere
Hydrogen fluoride	2.44949e-08			kilogram	air	biosphere
Lead II	4.62331e-07			kilogram	air	biosphere
Mercury II	2e-08			kilogram	air	biosphere
Nickel II	7.74597e-08			kilogram	air	biosphere
Nitrogen oxides	7.73305e-05			kilogram	air	biosphere
PAH, polycyclic aromatic hydrocarbons	9.34345e-08			kilogram	air	biosphere
Particulate Matter, < 2.5 um	1.47224e-05			kilogram	air	biosphere
Particulate Matter, > 10 um	5.19615e-06			kilogram	air	biosphere
Particulate Matter, > 2.5 um and < 10um	1.47224e-05			kilogram	air	biosphere
Polychlorinated biphenyls	2.23607e-10			kilogram	air	biosphere
Sulfur dioxide	3.24037e-05			kilogram	air	biosphere
Water	0.0022952			cubic meter	water	biosphere
Water	0.00292117			cubic meter	air	biosphere
Water, cooling, unspecified natural origin	0.00654217			cubic meter	natural resource::in water	biosphere
Zinc II	2.19089e-06			kilogram	air	biosphere
steel production, electric, chromium steel 18/8, optimistic, 2040	1	steel_prod_SSP2-NPi	World	kilogram		production	1	steel, chromium steel 18/8
market for anode, for metal electrolysis	0.004	remind - SSP2-NPi - 2040	GLO	kilogram		technosphere	0.004	anode, for metal electrolysis
market for argon, liquid	0.032	remind - SSP2-NPi - 2040	RoW	kilogram		technosphere	0.032	argon, liquid
market for electric arc furnace converter	4e-11	remind - SSP2-NPi - 2040	GLO	unit		technosphere	4e-11	electric arc furnace converter
market for electric arc furnace dust	0	remind - SSP2-NPi - 2040	RoW	kilogram		technosphere	0	electric arc furnace dust
market for electric arc furnace secondary metallurgy slag	0	remind - SSP2-NPi - 2040	RoW	kilogram		technosphere	0	electric arc furnace secondary metallurgy slag
market for electric arc furnace slag	0	remind - SSP2-NPi - 2040	RoW	kilogram		technosphere	0	electric arc furnace slag
market for electricity, medium voltage	0.000998198	remind - SSP2-NPi - 2040	NZ	kilowatt hour		technosphere	0.000998198	electricity, medium voltage
market for electricity, medium voltage	0.00509321	remind - SSP2-NPi - 2040	AU	kilowatt hour		technosphere	0.00509321	electricity, medium voltage
market for ferrochromium, high-carbon, 68% Cr	0	remind - SSP2-NPi - 2040	GLO	kilogram		technosphere	0	ferrochromium, high-carbon, 68% Cr
market for ferronickel	0	remind - SSP2-NPi - 2040	GLO	kilogram		technosphere	0	ferronickel
market for hard coal	0.00691265	remind - SSP2-NPi - 2040	RoW	kilogram		technosphere	0.00691265	hard coal
market for hot rolling, steel	1	remind - SSP2-NPi - 2040	GLO	kilogram		technosphere	1	hot rolling, steel
market for inert waste, for final disposal	-0.00678233	remind - SSP2-NPi - 2040	RoW	kilogram		technosphere	-0.00678233	inert waste, for final disposal
market for iron scrap, sorted, pressed	0	remind - SSP2-NPi - 2040	RoW	kilogram		technosphere	0	iron scrap, sorted, pressed
market for natural gas, high pressure	0.00564357	remind - SSP2-NPi - 2040	RoW	cubic meter		technosphere	0.00564357	natural gas, high pressure
market for nitrogen, liquid	0.00359723	remind - SSP2-NPi - 2040	RoW	kilogram		technosphere	0.00359723	nitrogen, liquid
market for oxygen, liquid	0.036	remind - SSP2-NPi - 2040	World	kilogram		technosphere	0.036	oxygen, liquid
market for quicklime, in pieces, loose	0.0591608	remind - SSP2-NPi - 2040	RoW	kilogram		technosphere	0.0591608	quicklime, in pieces, loose
market for refractory, basic, packed	0.0154919	remind - SSP2-NPi - 2040	GLO	kilogram		technosphere	0.0154919	refractory, basic, packed
market group for electricity, medium voltage	0.0335191	remind - SSP2-NPi - 2040	RLA	kilowatt hour		technosphere	0.0335191	electricity, medium voltage
market group for electricity, medium voltage	0.107422	remind - SSP2-NPi - 2040	RNA	kilowatt hour		technosphere	0.107422	electricity, medium voltage
market group for electricity, medium voltage	0.016822	remind - SSP2-NPi - 2040	RAF	kilowatt hour		technosphere	0.016822	electricity, medium voltage
market group for electricity, medium voltage	0.30754	remind - SSP2-NPi - 2040	RAS	kilowatt hour		technosphere	0.30754	electricity, medium voltage
preperation for recycling, steel scrap, from fossil infrastructure, 2040	1.1355	steel_prod_SSP2-NPi	GLO	kilogram		technosphere	1.1355	steel scrap, from fossil infrastructure
treatment of electric arc furnace dust, residual material landfill, optimistic, 2040	-0.0191274	steel_prod_SSP2-NPi	RoW	kilogram		technosphere	-0.0191274	electric arc furnace dust
treatment of electric arc furnace slag, residual material landfill, optimistic, 2040	-0.165106	steel_prod_SSP2-NPi	GLO	kilogram		technosphere	-0.165106	electric arc furnace slag
Activity	steel production, electric, chromium steel 18/8, optimistic, 2045
code	31f972a1baf74359bd53b939f4ceaa32
comment	This dataset has been modified by `premise`, according to the performance for steel production indicated by the IAM model REMIND for the IAM region World in 2100, following the scenario SSP1-NDC. The energy efficiency of the process has been improved by 28%.Background: This activity represents the production of stainless steel (Type 304, aka. 18/8; assumed composition 68.6% Fe, 9.3% Ni, 19.0% Cr …
location	World
reference product	steel, chromium steel 18/8
scenario	SSP2-NPi
type	process
unit	kilogram
worksheet name	steel_prod_SSP2-NPi
year	2045
Exchanges
name	amount	database	location	unit	categories	type	default_amount	reference product
Benzene	3.63318e-07			kilogram	air	biosphere
Benzene, hexachloro-	1.54919e-09			kilogram	air	biosphere
Cadmium II	1.21655e-08			kilogram	air	biosphere
Carbon dioxide, fossil	0.033168			kilogram	air	biosphere
Carbon dioxide, non-fossil	9.475e-05			kilogram	air	biosphere
Carbon monoxide, fossil	0.000474342			kilogram	air	biosphere
Chromium III	1.83303e-07			kilogram	air	biosphere
Copper ion	7.48999e-08			kilogram	air	biosphere
Dioxins, measured as 2,3,7,8-tetrachlorodibenzo-p-dioxin	4.89898e-13			kilogram	air	biosphere
Hydrocarbons, aromatic	7.7008e-05			kilogram	air	biosphere
Hydrochloric acid	5.31037e-06			kilogram	air	biosphere
Hydrogen fluoride	2.44949e-08			kilogram	air	biosphere
Lead II	4.62331e-07			kilogram	air	biosphere
Mercury II	2e-08			kilogram	air	biosphere
Nickel II	7.74597e-08			kilogram	air	biosphere
Nitrogen oxides	7.73305e-05			kilogram	air	biosphere
PAH, polycyclic aromatic hydrocarbons	9.34345e-08			kilogram	air	biosphere
Particulate Matter, < 2.5 um	1.47224e-05			kilogram	air	biosphere
Particulate Matter, > 10 um	5.19615e-06			kilogram	air	biosphere
Particulate Matter, > 2.5 um and < 10um	1.47224e-05			kilogram	air	biosphere
Polychlorinated biphenyls	2.23607e-10			kilogram	air	biosphere
Sulfur dioxide	3.24037e-05			kilogram	air	biosphere
Water	0.0022952			cubic meter	water	biosphere
Water	0.00292117			cubic meter	air	biosphere
Water, cooling, unspecified natural origin	0.00654217			cubic meter	natural resource::in water	biosphere
Zinc II	2.19089e-06			kilogram	air	biosphere
steel production, electric, chromium steel 18/8, optimistic, 2045	1	steel_prod_SSP2-NPi	World	kilogram		production	1	steel, chromium steel 18/8
market for anode, for metal electrolysis	0.004	remind - SSP2-NPi - 2045	GLO	kilogram		technosphere	0.004	anode, for metal electrolysis
market for argon, liquid	0.032	remind - SSP2-NPi - 2045	RoW	kilogram		technosphere	0.032	argon, liquid
market for electric arc furnace converter	4e-11	remind - SSP2-NPi - 2045	GLO	unit		technosphere	4e-11	electric arc furnace converter
market for electric arc furnace dust	0	remind - SSP2-NPi - 2045	RoW	kilogram		technosphere	0	electric arc furnace dust
market for electric arc furnace secondary metallurgy slag	0	remind - SSP2-NPi - 2045	RoW	kilogram		technosphere	0	electric arc furnace secondary metallurgy slag
market for electric arc furnace slag	0	remind - SSP2-NPi - 2045	RoW	kilogram		technosphere	0	electric arc furnace slag
market for electricity, medium voltage	0.000998198	remind - SSP2-NPi - 2045	NZ	kilowatt hour		technosphere	0.000998198	electricity, medium voltage
market for electricity, medium voltage	0.00509321	remind - SSP2-NPi - 2045	AU	kilowatt hour		technosphere	0.00509321	electricity, medium voltage
market for ferrochromium, high-carbon, 68% Cr	0	remind - SSP2-NPi - 2045	GLO	kilogram		technosphere	0	ferrochromium, high-carbon, 68% Cr
market for ferronickel	0	remind - SSP2-NPi - 2045	GLO	kilogram		technosphere	0	ferronickel
market for hard coal	0.00691265	remind - SSP2-NPi - 2045	RoW	kilogram		technosphere	0.00691265	hard coal
market for hot rolling, steel	1	remind - SSP2-NPi - 2045	GLO	kilogram		technosphere	1	hot rolling, steel
market for inert waste, for final disposal	-0.00678233	remind - SSP2-NPi - 2045	RoW	kilogram		technosphere	-0.00678233	inert waste, for final disposal
market for iron scrap, sorted, pressed	0	remind - SSP2-NPi - 2045	RoW	kilogram		technosphere	0	iron scrap, sorted, pressed
market for natural gas, high pressure	0.00564357	remind - SSP2-NPi - 2045	RoW	cubic meter		technosphere	0.00564357	natural gas, high pressure
market for nitrogen, liquid	0.00359723	remind - SSP2-NPi - 2045	RoW	kilogram		technosphere	0.00359723	nitrogen, liquid
market for oxygen, liquid	0.036	remind - SSP2-NPi - 2045	World	kilogram		technosphere	0.036	oxygen, liquid
market for quicklime, in pieces, loose	0.0591608	remind - SSP2-NPi - 2045	RoW	kilogram		technosphere	0.0591608	quicklime, in pieces, loose
market for refractory, basic, packed	0.0154919	remind - SSP2-NPi - 2045	GLO	kilogram		technosphere	0.0154919	refractory, basic, packed
market group for electricity, medium voltage	0.0335191	remind - SSP2-NPi - 2045	RLA	kilowatt hour		technosphere	0.0335191	electricity, medium voltage
market group for electricity, medium voltage	0.107422	remind - SSP2-NPi - 2045	RNA	kilowatt hour		technosphere	0.107422	electricity, medium voltage
market group for electricity, medium voltage	0.016822	remind - SSP2-NPi - 2045	RAF	kilowatt hour		technosphere	0.016822	electricity, medium voltage
market group for electricity, medium voltage	0.30754	remind - SSP2-NPi - 2045	RAS	kilowatt hour		technosphere	0.30754	electricity, medium voltage
preperation for recycling, steel scrap, from fossil infrastructure, 2045	1.1355	steel_prod_SSP2-NPi	GLO	kilogram		technosphere	1.1355	steel scrap, from fossil infrastructure
treatment of electric arc furnace dust, residual material landfill, optimistic, 2045	-0.0191274	steel_prod_SSP2-NPi	RoW	kilogram		technosphere	-0.0191274	electric arc furnace dust
treatment of electric arc furnace slag, residual material landfill, optimistic, 2045	-0.165106	steel_prod_SSP2-NPi	GLO	kilogram		technosphere	-0.165106	electric arc furnace slag
Activity	steel production, electric, chromium steel 18/8, optimistic, 2050
code	08083566e57949559c146008f278de02
comment	This dataset has been modified by `premise`, according to the performance for steel production indicated by the IAM model REMIND for the IAM region World in 2100, following the scenario SSP1-NDC. The energy efficiency of the process has been improved by 28%.Background: This activity represents the production of stainless steel (Type 304, aka. 18/8; assumed composition 68.6% Fe, 9.3% Ni, 19.0% Cr …
location	World
reference product	steel, chromium steel 18/8
scenario	SSP2-NPi
type	process
unit	kilogram
worksheet name	steel_prod_SSP2-NPi
year	2050
Exchanges
name	amount	database	location	unit	categories	type	default_amount	reference product
Benzene	3.63318e-07			kilogram	air	biosphere
Benzene, hexachloro-	1.54919e-09			kilogram	air	biosphere
Cadmium II	1.21655e-08			kilogram	air	biosphere
Carbon dioxide, fossil	0.033168			kilogram	air	biosphere
Carbon dioxide, non-fossil	9.475e-05			kilogram	air	biosphere
Carbon monoxide, fossil	0.000474342			kilogram	air	biosphere
Chromium III	1.83303e-07			kilogram	air	biosphere
Copper ion	7.48999e-08			kilogram	air	biosphere
Dioxins, measured as 2,3,7,8-tetrachlorodibenzo-p-dioxin	4.89898e-13			kilogram	air	biosphere
Hydrocarbons, aromatic	7.7008e-05			kilogram	air	biosphere
Hydrochloric acid	5.31037e-06			kilogram	air	biosphere
Hydrogen fluoride	2.44949e-08			kilogram	air	biosphere
Lead II	4.62331e-07			kilogram	air	biosphere
Mercury II	2e-08			kilogram	air	biosphere
Nickel II	7.74597e-08			kilogram	air	biosphere
Nitrogen oxides	7.73305e-05			kilogram	air	biosphere
PAH, polycyclic aromatic hydrocarbons	9.34345e-08			kilogram	air	biosphere
Particulate Matter, < 2.5 um	1.47224e-05			kilogram	air	biosphere
Particulate Matter, > 10 um	5.19615e-06			kilogram	air	biosphere
Particulate Matter, > 2.5 um and < 10um	1.47224e-05			kilogram	air	biosphere
Polychlorinated biphenyls	2.23607e-10			kilogram	air	biosphere
Sulfur dioxide	3.24037e-05			kilogram	air	biosphere
Water	0.0022952			cubic meter	water	biosphere
Water	0.00292117			cubic meter	air	biosphere
Water, cooling, unspecified natural origin	0.00654217			cubic meter	natural resource::in water	biosphere
Zinc II	2.19089e-06			kilogram	air	biosphere
steel production, electric, chromium steel 18/8, optimistic, 2050	1	steel_prod_SSP2-NPi	World	kilogram		production	1	steel, chromium steel 18/8
market for anode, for metal electrolysis	0.004	remind - SSP2-NPi - 2050	GLO	kilogram		technosphere	0.004	anode, for metal electrolysis
market for argon, liquid	0.032	remind - SSP2-NPi - 2050	RoW	kilogram		technosphere	0.032	argon, liquid
market for electric arc furnace converter	4e-11	remind - SSP2-NPi - 2050	GLO	unit		technosphere	4e-11	electric arc furnace converter
market for electric arc furnace dust	0	remind - SSP2-NPi - 2050	RoW	kilogram		technosphere	0	electric arc furnace dust
market for electric arc furnace secondary metallurgy slag	0	remind - SSP2-NPi - 2050	RoW	kilogram		technosphere	0	electric arc furnace secondary metallurgy slag
market for electric arc furnace slag	0	remind - SSP2-NPi - 2050	RoW	kilogram		technosphere	0	electric arc furnace slag
market for electricity, medium voltage	0.000998198	remind - SSP2-NPi - 2050	NZ	kilowatt hour		technosphere	0.000998198	electricity, medium voltage
market for electricity, medium voltage	0.00509321	remind - SSP2-NPi - 2050	AU	kilowatt hour		technosphere	0.00509321	electricity, medium voltage
market for ferrochromium, high-carbon, 68% Cr	0	remind - SSP2-NPi - 2050	GLO	kilogram		technosphere	0	ferrochromium, high-carbon, 68% Cr
market for ferronickel	0	remind - SSP2-NPi - 2050	GLO	kilogram		technosphere	0	ferronickel
market for hard coal	0.00691265	remind - SSP2-NPi - 2050	RoW	kilogram		technosphere	0.00691265	hard coal
market for hot rolling, steel	1	remind - SSP2-NPi - 2050	GLO	kilogram		technosphere	1	hot rolling, steel
market for inert waste, for final disposal	-0.00678233	remind - SSP2-NPi - 2050	RoW	kilogram		technosphere	-0.00678233	inert waste, for final disposal
market for iron scrap, sorted, pressed	0	remind - SSP2-NPi - 2050	RoW	kilogram		technosphere	0	iron scrap, sorted, pressed
market for natural gas, high pressure	0.00564357	remind - SSP2-NPi - 2050	RoW	cubic meter		technosphere	0.00564357	natural gas, high pressure
market for nitrogen, liquid	0.00359723	remind - SSP2-NPi - 2050	RoW	kilogram		technosphere	0.00359723	nitrogen, liquid
market for oxygen, liquid	0.036	remind - SSP2-NPi - 2050	World	kilogram		technosphere	0.036	oxygen, liquid
market for quicklime, in pieces, loose	0.0591608	remind - SSP2-NPi - 2050	RoW	kilogram		technosphere	0.0591608	quicklime, in pieces, loose
market for refractory, basic, packed	0.0154919	remind - SSP2-NPi - 2050	GLO	kilogram		technosphere	0.0154919	refractory, basic, packed
market group for electricity, medium voltage	0.0335191	remind - SSP2-NPi - 2050	RLA	kilowatt hour		technosphere	0.0335191	electricity, medium voltage
market group for electricity, medium voltage	0.107422	remind - SSP2-NPi - 2050	RNA	kilowatt hour		technosphere	0.107422	electricity, medium voltage
market group for electricity, medium voltage	0.016822	remind - SSP2-NPi - 2050	RAF	kilowatt hour		technosphere	0.016822	electricity, medium voltage
market group for electricity, medium voltage	0.30754	remind - SSP2-NPi - 2050	RAS	kilowatt hour		technosphere	0.30754	electricity, medium voltage
preperation for recycling, steel scrap, from fossil infrastructure, 2050	1.1355	steel_prod_SSP2-NPi	GLO	kilogram		technosphere	1.1355	steel scrap, from fossil infrastructure
treatment of electric arc furnace dust, residual material landfill, optimistic, 2050	-0.0191274	steel_prod_SSP2-NPi	RoW	kilogram		technosphere	-0.0191274	electric arc furnace dust
treatment of electric arc furnace slag, residual material landfill, optimistic, 2050	-0.165106	steel_prod_SSP2-NPi	GLO	kilogram		technosphere	-0.165106	electric arc furnace slag
Activity	steel production, electric, chromium steel 18/8, pessimistic, 2025
code	8ee1fadc8ab44abca69409f2d2e1930b
comment	This dataset has been modified by `premise`, according to the performance for steel production indicated by the IAM model REMIND for the IAM region World in 2100, following the scenario SSP1-NDC. The energy efficiency of the process has been improved by 28%.Background: This activity represents the production of stainless steel (Type 304, aka. 18/8; assumed composition 68.6% Fe, 9.3% Ni, 19.0% Cr …
location	World
reference product	steel, chromium steel 18/8
scenario	SSP2-NPi
type	process
unit	kilogram
worksheet name	steel_prod_SSP2-NPi
year	2025
Exchanges
name	amount	database	location	unit	categories	type	default_amount	reference product
Benzene	3.63318e-07			kilogram	air	biosphere
Benzene, hexachloro-	1.54919e-09			kilogram	air	biosphere
Cadmium II	1.21655e-08			kilogram	air	biosphere
Carbon dioxide, fossil	0.033168			kilogram	air	biosphere
Carbon dioxide, non-fossil	9.475e-05			kilogram	air	biosphere
Carbon monoxide, fossil	0.000474342			kilogram	air	biosphere
Chromium III	1.83303e-07			kilogram	air	biosphere
Copper ion	7.48999e-08			kilogram	air	biosphere
Dioxins, measured as 2,3,7,8-tetrachlorodibenzo-p-dioxin	4.89898e-13			kilogram	air	biosphere
Hydrocarbons, aromatic	7.7008e-05			kilogram	air	biosphere
Hydrochloric acid	5.31037e-06			kilogram	air	biosphere
Hydrogen fluoride	2.44949e-08			kilogram	air	biosphere
Lead II	4.62331e-07			kilogram	air	biosphere
Mercury II	2e-08			kilogram	air	biosphere
Nickel II	7.74597e-08			kilogram	air	biosphere
Nitrogen oxides	7.73305e-05			kilogram	air	biosphere
PAH, polycyclic aromatic hydrocarbons	9.34345e-08			kilogram	air	biosphere
Particulate Matter, < 2.5 um	1.47224e-05			kilogram	air	biosphere
Particulate Matter, > 10 um	5.19615e-06			kilogram	air	biosphere
Particulate Matter, > 2.5 um and < 10um	1.47224e-05			kilogram	air	biosphere
Polychlorinated biphenyls	2.23607e-10			kilogram	air	biosphere
Sulfur dioxide	3.24037e-05			kilogram	air	biosphere
Water	0.0022952			cubic meter	water	biosphere
Water	0.00292117			cubic meter	air	biosphere
Water, cooling, unspecified natural origin	0.00654217			cubic meter	natural resource::in water	biosphere
Zinc II	2.19089e-06			kilogram	air	biosphere
steel production, electric, chromium steel 18/8, pessimistic, 2025	1	steel_prod_SSP2-NPi	World	kilogram		production	1	steel, chromium steel 18/8
market for anode, for metal electrolysis	0.004	remind - SSP2-NPi - 2025	GLO	kilogram		technosphere	0.004	anode, for metal electrolysis
market for argon, liquid	0.032	remind - SSP2-NPi - 2025	RoW	kilogram		technosphere	0.032	argon, liquid
market for electric arc furnace converter	4e-11	remind - SSP2-NPi - 2025	GLO	unit		technosphere	4e-11	electric arc furnace converter
market for electricity, medium voltage	0.000998198	remind - SSP2-NPi - 2025	NZ	kilowatt hour		technosphere	0.000998198	electricity, medium voltage
market for electricity, medium voltage	0.00509321	remind - SSP2-NPi - 2025	AU	kilowatt hour		technosphere	0.00509321	electricity, medium voltage
market for ferrochromium, high-carbon, 68% Cr	0.26471	remind - SSP2-NPi - 2025	GLO	kilogram		technosphere	0.26471	ferrochromium, high-carbon, 68% Cr
market for ferronickel	0.32	remind - SSP2-NPi - 2025	GLO	kilogram		technosphere	0.32	ferronickel
market for hard coal	0.00691265	remind - SSP2-NPi - 2025	RoW	kilogram		technosphere	0.00691265	hard coal
market for hot rolling, steel	1	remind - SSP2-NPi - 2025	GLO	kilogram		technosphere	1	hot rolling, steel
market for inert waste, for final disposal	-0.00678233	remind - SSP2-NPi - 2025	RoW	kilogram		technosphere	-0.00678233	inert waste, for final disposal
market for natural gas, high pressure	0.00564357	remind - SSP2-NPi - 2025	RoW	cubic meter		technosphere	0.00564357	natural gas, high pressure
market for nitrogen, liquid	0.00359723	remind - SSP2-NPi - 2025	RoW	kilogram		technosphere	0.00359723	nitrogen, liquid
market for oxygen, liquid	0.036	remind - SSP2-NPi - 2025	World	kilogram		technosphere	0.036	oxygen, liquid
market for quicklime, in pieces, loose	0.0591608	remind - SSP2-NPi - 2025	RoW	kilogram		technosphere	0.0591608	quicklime, in pieces, loose
market for refractory, basic, packed	0.0154919	remind - SSP2-NPi - 2025	GLO	kilogram		technosphere	0.0154919	refractory, basic, packed
market group for electricity, medium voltage	0.0335191	remind - SSP2-NPi - 2025	RLA	kilowatt hour		technosphere	0.0335191	electricity, medium voltage
market group for electricity, medium voltage	0.107422	remind - SSP2-NPi - 2025	RNA	kilowatt hour		technosphere	0.107422	electricity, medium voltage
market group for electricity, medium voltage	0.016822	remind - SSP2-NPi - 2025	RAF	kilowatt hour		technosphere	0.016822	electricity, medium voltage
market group for electricity, medium voltage	0.30754	remind - SSP2-NPi - 2025	RAS	kilowatt hour		technosphere	0.30754	electricity, medium voltage
preperation for recycling, steel scrap, from fossil infrastructure, 2025	0.55079	steel_prod_SSP2-NPi	GLO	kilogram		technosphere	0.55079	steel scrap, from fossil infrastructure
treatment of electric arc furnace dust, residual material landfill, pessimistic, 2025	-0.0191274	steel_prod_SSP2-NPi	RoW	kilogram		technosphere	-0.0191274	electric arc furnace dust
treatment of electric arc furnace slag, residual material landfill, pessimistic, 2025	-0.165106	steel_prod_SSP2-NPi	GLO	kilogram		technosphere	-0.165106	electric arc furnace slag
Activity	steel production, electric, chromium steel 18/8, pessimistic, 2030
code	3c61e9fa0a244e32acd4a45f8dda2fba
comment	This dataset has been modified by `premise`, according to the performance for steel production indicated by the IAM model REMIND for the IAM region World in 2100, following the scenario SSP1-NDC. The energy efficiency of the process has been improved by 28%.Background: This activity represents the production of stainless steel (Type 304, aka. 18/8; assumed composition 68.6% Fe, 9.3% Ni, 19.0% Cr …
location	World
reference product	steel, chromium steel 18/8
scenario	SSP2-NPi
type	process
unit	kilogram
worksheet name	steel_prod_SSP2-NPi
year	2030
Exchanges
name	amount	database	location	unit	categories	type	default_amount	reference product
Benzene	3.63318e-07			kilogram	air	biosphere
Benzene, hexachloro-	1.54919e-09			kilogram	air	biosphere
Cadmium II	1.21655e-08			kilogram	air	biosphere
Carbon dioxide, fossil	0.033168			kilogram	air	biosphere
Carbon dioxide, non-fossil	9.475e-05			kilogram	air	biosphere
Carbon monoxide, fossil	0.000474342			kilogram	air	biosphere
Chromium III	1.83303e-07			kilogram	air	biosphere
Copper ion	7.48999e-08			kilogram	air	biosphere
Dioxins, measured as 2,3,7,8-tetrachlorodibenzo-p-dioxin	4.89898e-13			kilogram	air	biosphere
Hydrocarbons, aromatic	7.7008e-05			kilogram	air	biosphere
Hydrochloric acid	5.31037e-06			kilogram	air	biosphere
Hydrogen fluoride	2.44949e-08			kilogram	air	biosphere
Lead II	4.62331e-07			kilogram	air	biosphere
Mercury II	2e-08			kilogram	air	biosphere
Nickel II	7.74597e-08			kilogram	air	biosphere
Nitrogen oxides	7.73305e-05			kilogram	air	biosphere
PAH, polycyclic aromatic hydrocarbons	9.34345e-08			kilogram	air	biosphere
Particulate Matter, < 2.5 um	1.47224e-05			kilogram	air	biosphere
Particulate Matter, > 10 um	5.19615e-06			kilogram	air	biosphere
Particulate Matter, > 2.5 um and < 10um	1.47224e-05			kilogram	air	biosphere
Polychlorinated biphenyls	2.23607e-10			kilogram	air	biosphere
Sulfur dioxide	3.24037e-05			kilogram	air	biosphere
Water	0.0022952			cubic meter	water	biosphere
Water	0.00292117			cubic meter	air	biosphere
Water, cooling, unspecified natural origin	0.00654217			cubic meter	natural resource::in water	biosphere
Zinc II	2.19089e-06			kilogram	air	biosphere
steel production, electric, chromium steel 18/8, pessimistic, 2030	1	steel_prod_SSP2-NPi	World	kilogram		production	1	steel, chromium steel 18/8
market for anode, for metal electrolysis	0.004	remind - SSP2-NPi - 2030	GLO	kilogram		technosphere	0.004	anode, for metal electrolysis
market for argon, liquid	0.032	remind - SSP2-NPi - 2030	RoW	kilogram		technosphere	0.032	argon, liquid
market for electric arc furnace converter	4e-11	remind - SSP2-NPi - 2030	GLO	unit		technosphere	4e-11	electric arc furnace converter
market for electricity, medium voltage	0.000998198	remind - SSP2-NPi - 2030	NZ	kilowatt hour		technosphere	0.000998198	electricity, medium voltage
market for electricity, medium voltage	0.00509321	remind - SSP2-NPi - 2030	AU	kilowatt hour		technosphere	0.00509321	electricity, medium voltage
market for ferrochromium, high-carbon, 68% Cr	0.26471	remind - SSP2-NPi - 2030	GLO	kilogram		technosphere	0.26471	ferrochromium, high-carbon, 68% Cr
market for ferronickel	0.32	remind - SSP2-NPi - 2030	GLO	kilogram		technosphere	0.32	ferronickel
market for hard coal	0.00691265	remind - SSP2-NPi - 2030	RoW	kilogram		technosphere	0.00691265	hard coal
market for hot rolling, steel	1	remind - SSP2-NPi - 2030	GLO	kilogram		technosphere	1	hot rolling, steel
market for inert waste, for final disposal	-0.00678233	remind - SSP2-NPi - 2030	RoW	kilogram		technosphere	-0.00678233	inert waste, for final disposal
market for natural gas, high pressure	0.00564357	remind - SSP2-NPi - 2030	RoW	cubic meter		technosphere	0.00564357	natural gas, high pressure
market for nitrogen, liquid	0.00359723	remind - SSP2-NPi - 2030	RoW	kilogram		technosphere	0.00359723	nitrogen, liquid
market for oxygen, liquid	0.036	remind - SSP2-NPi - 2030	World	kilogram		technosphere	0.036	oxygen, liquid
market for quicklime, in pieces, loose	0.0591608	remind - SSP2-NPi - 2030	RoW	kilogram		technosphere	0.0591608	quicklime, in pieces, loose
market for refractory, basic, packed	0.0154919	remind - SSP2-NPi - 2030	GLO	kilogram		technosphere	0.0154919	refractory, basic, packed
market group for electricity, medium voltage	0.0335191	remind - SSP2-NPi - 2030	RLA	kilowatt hour		technosphere	0.0335191	electricity, medium voltage
market group for electricity, medium voltage	0.107422	remind - SSP2-NPi - 2030	RNA	kilowatt hour		technosphere	0.107422	electricity, medium voltage
market group for electricity, medium voltage	0.016822	remind - SSP2-NPi - 2030	RAF	kilowatt hour		technosphere	0.016822	electricity, medium voltage
market group for electricity, medium voltage	0.30754	remind - SSP2-NPi - 2030	RAS	kilowatt hour		technosphere	0.30754	electricity, medium voltage
preperation for recycling, steel scrap, from fossil infrastructure, 2030	0.55079	steel_prod_SSP2-NPi	GLO	kilogram		technosphere	0.55079	steel scrap, from fossil infrastructure
treatment of electric arc furnace dust, residual material landfill, pessimistic, 2030	-0.0191274	steel_prod_SSP2-NPi	RoW	kilogram		technosphere	-0.0191274	electric arc furnace dust
treatment of electric arc furnace slag, residual material landfill, pessimistic, 2030	-0.165106	steel_prod_SSP2-NPi	GLO	kilogram		technosphere	-0.165106	electric arc furnace slag
Activity	steel production, electric, chromium steel 18/8, pessimistic, 2035
code	55d1f8aca6574671b3502440515118e8
comment	This dataset has been modified by `premise`, according to the performance for steel production indicated by the IAM model REMIND for the IAM region World in 2100, following the scenario SSP1-NDC. The energy efficiency of the process has been improved by 28%.Background: This activity represents the production of stainless steel (Type 304, aka. 18/8; assumed composition 68.6% Fe, 9.3% Ni, 19.0% Cr …
location	World
reference product	steel, chromium steel 18/8
scenario	SSP2-NPi
type	process
unit	kilogram
worksheet name	steel_prod_SSP2-NPi
year	2035
Exchanges
name	amount	database	location	unit	categories	type	default_amount	reference product
Benzene	3.63318e-07			kilogram	air	biosphere
Benzene, hexachloro-	1.54919e-09			kilogram	air	biosphere
Cadmium II	1.21655e-08			kilogram	air	biosphere
Carbon dioxide, fossil	0.033168			kilogram	air	biosphere
Carbon dioxide, non-fossil	9.475e-05			kilogram	air	biosphere
Carbon monoxide, fossil	0.000474342			kilogram	air	biosphere
Chromium III	1.83303e-07			kilogram	air	biosphere
Copper ion	7.48999e-08			kilogram	air	biosphere
Dioxins, measured as 2,3,7,8-tetrachlorodibenzo-p-dioxin	4.89898e-13			kilogram	air	biosphere
Hydrocarbons, aromatic	7.7008e-05			kilogram	air	biosphere
Hydrochloric acid	5.31037e-06			kilogram	air	biosphere
Hydrogen fluoride	2.44949e-08			kilogram	air	biosphere
Lead II	4.62331e-07			kilogram	air	biosphere
Mercury II	2e-08			kilogram	air	biosphere
Nickel II	7.74597e-08			kilogram	air	biosphere
Nitrogen oxides	7.73305e-05			kilogram	air	biosphere
PAH, polycyclic aromatic hydrocarbons	9.34345e-08			kilogram	air	biosphere
Particulate Matter, < 2.5 um	1.47224e-05			kilogram	air	biosphere
Particulate Matter, > 10 um	5.19615e-06			kilogram	air	biosphere
Particulate Matter, > 2.5 um and < 10um	1.47224e-05			kilogram	air	biosphere
Polychlorinated biphenyls	2.23607e-10			kilogram	air	biosphere
Sulfur dioxide	3.24037e-05			kilogram	air	biosphere
Water	0.0022952			cubic meter	water	biosphere
Water	0.00292117			cubic meter	air	biosphere
Water, cooling, unspecified natural origin	0.00654217			cubic meter	natural resource::in water	biosphere
Zinc II	2.19089e-06			kilogram	air	biosphere
steel production, electric, chromium steel 18/8, pessimistic, 2035	1	steel_prod_SSP2-NPi	World	kilogram		production	1	steel, chromium steel 18/8
market for anode, for metal electrolysis	0.004	remind - SSP2-NPi - 2035	GLO	kilogram		technosphere	0.004	anode, for metal electrolysis
market for argon, liquid	0.032	remind - SSP2-NPi - 2035	RoW	kilogram		technosphere	0.032	argon, liquid
market for electric arc furnace converter	4e-11	remind - SSP2-NPi - 2035	GLO	unit		technosphere	4e-11	electric arc furnace converter
market for electricity, medium voltage	0.000998198	remind - SSP2-NPi - 2035	NZ	kilowatt hour		technosphere	0.000998198	electricity, medium voltage
market for electricity, medium voltage	0.00509321	remind - SSP2-NPi - 2035	AU	kilowatt hour		technosphere	0.00509321	electricity, medium voltage
market for ferrochromium, high-carbon, 68% Cr	0.26471	remind - SSP2-NPi - 2035	GLO	kilogram		technosphere	0.26471	ferrochromium, high-carbon, 68% Cr
market for ferronickel	0.32	remind - SSP2-NPi - 2035	GLO	kilogram		technosphere	0.32	ferronickel
market for hard coal	0.00691265	remind - SSP2-NPi - 2035	RoW	kilogram		technosphere	0.00691265	hard coal
market for hot rolling, steel	1	remind - SSP2-NPi - 2035	GLO	kilogram		technosphere	1	hot rolling, steel
market for inert waste, for final disposal	-0.00678233	remind - SSP2-NPi - 2035	RoW	kilogram		technosphere	-0.00678233	inert waste, for final disposal
market for natural gas, high pressure	0.00564357	remind - SSP2-NPi - 2035	RoW	cubic meter		technosphere	0.00564357	natural gas, high pressure
market for nitrogen, liquid	0.00359723	remind - SSP2-NPi - 2035	RoW	kilogram		technosphere	0.00359723	nitrogen, liquid
market for oxygen, liquid	0.036	remind - SSP2-NPi - 2035	World	kilogram		technosphere	0.036	oxygen, liquid
market for quicklime, in pieces, loose	0.0591608	remind - SSP2-NPi - 2035	RoW	kilogram		technosphere	0.0591608	quicklime, in pieces, loose
market for refractory, basic, packed	0.0154919	remind - SSP2-NPi - 2035	GLO	kilogram		technosphere	0.0154919	refractory, basic, packed
market group for electricity, medium voltage	0.0335191	remind - SSP2-NPi - 2035	RLA	kilowatt hour		technosphere	0.0335191	electricity, medium voltage
market group for electricity, medium voltage	0.107422	remind - SSP2-NPi - 2035	RNA	kilowatt hour		technosphere	0.107422	electricity, medium voltage
market group for electricity, medium voltage	0.016822	remind - SSP2-NPi - 2035	RAF	kilowatt hour		technosphere	0.016822	electricity, medium voltage
market group for electricity, medium voltage	0.30754	remind - SSP2-NPi - 2035	RAS	kilowatt hour		technosphere	0.30754	electricity, medium voltage
preperation for recycling, steel scrap, from fossil infrastructure, 2035	0.55079	steel_prod_SSP2-NPi	GLO	kilogram		technosphere	0.55079	steel scrap, from fossil infrastructure
treatment of electric arc furnace dust, residual material landfill, pessimistic, 2035	-0.0191274	steel_prod_SSP2-NPi	RoW	kilogram		technosphere	-0.0191274	electric arc furnace dust
treatment of electric arc furnace slag, residual material landfill, pessimistic, 2035	-0.165106	steel_prod_SSP2-NPi	GLO	kilogram		technosphere	-0.165106	electric arc furnace slag
Activity	steel production, electric, chromium steel 18/8, pessimistic, 2040
code	5b81c8b84561463da6332e1ab286e2f9
comment	This dataset has been modified by `premise`, according to the performance for steel production indicated by the IAM model REMIND for the IAM region World in 2100, following the scenario SSP1-NDC. The energy efficiency of the process has been improved by 28%.Background: This activity represents the production of stainless steel (Type 304, aka. 18/8; assumed composition 68.6% Fe, 9.3% Ni, 19.0% Cr …
location	World
reference product	steel, chromium steel 18/8
scenario	SSP2-NPi
type	process
unit	kilogram
worksheet name	steel_prod_SSP2-NPi
year	2040
Exchanges
name	amount	database	location	unit	categories	type	default_amount	reference product
Benzene	3.63318e-07			kilogram	air	biosphere
Benzene, hexachloro-	1.54919e-09			kilogram	air	biosphere
Cadmium II	1.21655e-08			kilogram	air	biosphere
Carbon dioxide, fossil	0.033168			kilogram	air	biosphere
Carbon dioxide, non-fossil	9.475e-05			kilogram	air	biosphere
Carbon monoxide, fossil	0.000474342			kilogram	air	biosphere
Chromium III	1.83303e-07			kilogram	air	biosphere
Copper ion	7.48999e-08			kilogram	air	biosphere
Dioxins, measured as 2,3,7,8-tetrachlorodibenzo-p-dioxin	4.89898e-13			kilogram	air	biosphere
Hydrocarbons, aromatic	7.7008e-05			kilogram	air	biosphere
Hydrochloric acid	5.31037e-06			kilogram	air	biosphere
Hydrogen fluoride	2.44949e-08			kilogram	air	biosphere
Lead II	4.62331e-07			kilogram	air	biosphere
Mercury II	2e-08			kilogram	air	biosphere
Nickel II	7.74597e-08			kilogram	air	biosphere
Nitrogen oxides	7.73305e-05			kilogram	air	biosphere
PAH, polycyclic aromatic hydrocarbons	9.34345e-08			kilogram	air	biosphere
Particulate Matter, < 2.5 um	1.47224e-05			kilogram	air	biosphere
Particulate Matter, > 10 um	5.19615e-06			kilogram	air	biosphere
Particulate Matter, > 2.5 um and < 10um	1.47224e-05			kilogram	air	biosphere
Polychlorinated biphenyls	2.23607e-10			kilogram	air	biosphere
Sulfur dioxide	3.24037e-05			kilogram	air	biosphere
Water	0.0022952			cubic meter	water	biosphere
Water	0.00292117			cubic meter	air	biosphere
Water, cooling, unspecified natural origin	0.00654217			cubic meter	natural resource::in water	biosphere
Zinc II	2.19089e-06			kilogram	air	biosphere
steel production, electric, chromium steel 18/8, pessimistic, 2040	1	steel_prod_SSP2-NPi	World	kilogram		production	1	steel, chromium steel 18/8
market for anode, for metal electrolysis	0.004	remind - SSP2-NPi - 2040	GLO	kilogram		technosphere	0.004	anode, for metal electrolysis
market for argon, liquid	0.032	remind - SSP2-NPi - 2040	RoW	kilogram		technosphere	0.032	argon, liquid
market for electric arc furnace converter	4e-11	remind - SSP2-NPi - 2040	GLO	unit		technosphere	4e-11	electric arc furnace converter
market for electricity, medium voltage	0.000998198	remind - SSP2-NPi - 2040	NZ	kilowatt hour		technosphere	0.000998198	electricity, medium voltage
market for electricity, medium voltage	0.00509321	remind - SSP2-NPi - 2040	AU	kilowatt hour		technosphere	0.00509321	electricity, medium voltage
market for ferrochromium, high-carbon, 68% Cr	0.26471	remind - SSP2-NPi - 2040	GLO	kilogram		technosphere	0.26471	ferrochromium, high-carbon, 68% Cr
market for ferronickel	0.32	remind - SSP2-NPi - 2040	GLO	kilogram		technosphere	0.32	ferronickel
market for hard coal	0.00691265	remind - SSP2-NPi - 2040	RoW	kilogram		technosphere	0.00691265	hard coal
market for hot rolling, steel	1	remind - SSP2-NPi - 2040	GLO	kilogram		technosphere	1	hot rolling, steel
market for inert waste, for final disposal	-0.00678233	remind - SSP2-NPi - 2040	RoW	kilogram		technosphere	-0.00678233	inert waste, for final disposal
market for natural gas, high pressure	0.00564357	remind - SSP2-NPi - 2040	RoW	cubic meter		technosphere	0.00564357	natural gas, high pressure
market for nitrogen, liquid	0.00359723	remind - SSP2-NPi - 2040	RoW	kilogram		technosphere	0.00359723	nitrogen, liquid
market for oxygen, liquid	0.036	remind - SSP2-NPi - 2040	World	kilogram		technosphere	0.036	oxygen, liquid
market for quicklime, in pieces, loose	0.0591608	remind - SSP2-NPi - 2040	RoW	kilogram		technosphere	0.0591608	quicklime, in pieces, loose
market for refractory, basic, packed	0.0154919	remind - SSP2-NPi - 2040	GLO	kilogram		technosphere	0.0154919	refractory, basic, packed
market group for electricity, medium voltage	0.0335191	remind - SSP2-NPi - 2040	RLA	kilowatt hour		technosphere	0.0335191	electricity, medium voltage
market group for electricity, medium voltage	0.107422	remind - SSP2-NPi - 2040	RNA	kilowatt hour		technosphere	0.107422	electricity, medium voltage
market group for electricity, medium voltage	0.016822	remind - SSP2-NPi - 2040	RAF	kilowatt hour		technosphere	0.016822	electricity, medium voltage
market group for electricity, medium voltage	0.30754	remind - SSP2-NPi - 2040	RAS	kilowatt hour		technosphere	0.30754	electricity, medium voltage
preperation for recycling, steel scrap, from fossil infrastructure, 2040	0.55079	steel_prod_SSP2-NPi	GLO	kilogram		technosphere	0.55079	steel scrap, from fossil infrastructure
treatment of electric arc furnace dust, residual material landfill, pessimistic, 2040	-0.0191274	steel_prod_SSP2-NPi	RoW	kilogram		technosphere	-0.0191274	electric arc furnace dust
treatment of electric arc furnace slag, residual material landfill, pessimistic, 2040	-0.165106	steel_prod_SSP2-NPi	GLO	kilogram		technosphere	-0.165106	electric arc furnace slag
Activity	steel production, electric, chromium steel 18/8, pessimistic, 2045
code	5d71696db499451086e7f275f80f4ba8
comment	This dataset has been modified by `premise`, according to the performance for steel production indicated by the IAM model REMIND for the IAM region World in 2100, following the scenario SSP1-NDC. The energy efficiency of the process has been improved by 28%.Background: This activity represents the production of stainless steel (Type 304, aka. 18/8; assumed composition 68.6% Fe, 9.3% Ni, 19.0% Cr …
location	World
reference product	steel, chromium steel 18/8
scenario	SSP2-NPi
type	process
unit	kilogram
worksheet name	steel_prod_SSP2-NPi
year	2045
Exchanges
name	amount	database	location	unit	categories	type	default_amount	reference product
Benzene	3.63318e-07			kilogram	air	biosphere
Benzene, hexachloro-	1.54919e-09			kilogram	air	biosphere
Cadmium II	1.21655e-08			kilogram	air	biosphere
Carbon dioxide, fossil	0.033168			kilogram	air	biosphere
Carbon dioxide, non-fossil	9.475e-05			kilogram	air	biosphere
Carbon monoxide, fossil	0.000474342			kilogram	air	biosphere
Chromium III	1.83303e-07			kilogram	air	biosphere
Copper ion	7.48999e-08			kilogram	air	biosphere
Dioxins, measured as 2,3,7,8-tetrachlorodibenzo-p-dioxin	4.89898e-13			kilogram	air	biosphere
Hydrocarbons, aromatic	7.7008e-05			kilogram	air	biosphere
Hydrochloric acid	5.31037e-06			kilogram	air	biosphere
Hydrogen fluoride	2.44949e-08			kilogram	air	biosphere
Lead II	4.62331e-07			kilogram	air	biosphere
Mercury II	2e-08			kilogram	air	biosphere
Nickel II	7.74597e-08			kilogram	air	biosphere
Nitrogen oxides	7.73305e-05			kilogram	air	biosphere
PAH, polycyclic aromatic hydrocarbons	9.34345e-08			kilogram	air	biosphere
Particulate Matter, < 2.5 um	1.47224e-05			kilogram	air	biosphere
Particulate Matter, > 10 um	5.19615e-06			kilogram	air	biosphere
Particulate Matter, > 2.5 um and < 10um	1.47224e-05			kilogram	air	biosphere
Polychlorinated biphenyls	2.23607e-10			kilogram	air	biosphere
Sulfur dioxide	3.24037e-05			kilogram	air	biosphere
Water	0.0022952			cubic meter	water	biosphere
Water	0.00292117			cubic meter	air	biosphere
Water, cooling, unspecified natural origin	0.00654217			cubic meter	natural resource::in water	biosphere
Zinc II	2.19089e-06			kilogram	air	biosphere
steel production, electric, chromium steel 18/8, pessimistic, 2045	1	steel_prod_SSP2-NPi	World	kilogram		production	1	steel, chromium steel 18/8
market for anode, for metal electrolysis	0.004	remind - SSP2-NPi - 2045	GLO	kilogram		technosphere	0.004	anode, for metal electrolysis
market for argon, liquid	0.032	remind - SSP2-NPi - 2045	RoW	kilogram		technosphere	0.032	argon, liquid
market for electric arc furnace converter	4e-11	remind - SSP2-NPi - 2045	GLO	unit		technosphere	4e-11	electric arc furnace converter
market for electricity, medium voltage	0.000998198	remind - SSP2-NPi - 2045	NZ	kilowatt hour		technosphere	0.000998198	electricity, medium voltage
market for electricity, medium voltage	0.00509321	remind - SSP2-NPi - 2045	AU	kilowatt hour		technosphere	0.00509321	electricity, medium voltage
market for ferrochromium, high-carbon, 68% Cr	0.26471	remind - SSP2-NPi - 2045	GLO	kilogram		technosphere	0.26471	ferrochromium, high-carbon, 68% Cr
market for ferronickel	0.32	remind - SSP2-NPi - 2045	GLO	kilogram		technosphere	0.32	ferronickel
market for hard coal	0.00691265	remind - SSP2-NPi - 2045	RoW	kilogram		technosphere	0.00691265	hard coal
market for hot rolling, steel	1	remind - SSP2-NPi - 2045	GLO	kilogram		technosphere	1	hot rolling, steel
market for inert waste, for final disposal	-0.00678233	remind - SSP2-NPi - 2045	RoW	kilogram		technosphere	-0.00678233	inert waste, for final disposal
market for natural gas, high pressure	0.00564357	remind - SSP2-NPi - 2045	RoW	cubic meter		technosphere	0.00564357	natural gas, high pressure
market for nitrogen, liquid	0.00359723	remind - SSP2-NPi - 2045	RoW	kilogram		technosphere	0.00359723	nitrogen, liquid
market for oxygen, liquid	0.036	remind - SSP2-NPi - 2045	World	kilogram		technosphere	0.036	oxygen, liquid
market for quicklime, in pieces, loose	0.0591608	remind - SSP2-NPi - 2045	RoW	kilogram		technosphere	0.0591608	quicklime, in pieces, loose
market for refractory, basic, packed	0.0154919	remind - SSP2-NPi - 2045	GLO	kilogram		technosphere	0.0154919	refractory, basic, packed
market group for electricity, medium voltage	0.0335191	remind - SSP2-NPi - 2045	RLA	kilowatt hour		technosphere	0.0335191	electricity, medium voltage
market group for electricity, medium voltage	0.107422	remind - SSP2-NPi - 2045	RNA	kilowatt hour		technosphere	0.107422	electricity, medium voltage
market group for electricity, medium voltage	0.016822	remind - SSP2-NPi - 2045	RAF	kilowatt hour		technosphere	0.016822	electricity, medium voltage
market group for electricity, medium voltage	0.30754	remind - SSP2-NPi - 2045	RAS	kilowatt hour		technosphere	0.30754	electricity, medium voltage
preperation for recycling, steel scrap, from fossil infrastructure, 2045	0.55079	steel_prod_SSP2-NPi	GLO	kilogram		technosphere	0.55079	steel scrap, from fossil infrastructure
treatment of electric arc furnace dust, residual material landfill, pessimistic, 2045	-0.0191274	steel_prod_SSP2-NPi	RoW	kilogram		technosphere	-0.0191274	electric arc furnace dust
treatment of electric arc furnace slag, residual material landfill, pessimistic, 2045	-0.165106	steel_prod_SSP2-NPi	GLO	kilogram		technosphere	-0.165106	electric arc furnace slag
Activity	steel production, electric, chromium steel 18/8, pessimistic, 2050
code	b189f50bfd1044a881c519d0f66b77eb
comment	This dataset has been modified by `premise`, according to the performance for steel production indicated by the IAM model REMIND for the IAM region World in 2100, following the scenario SSP1-NDC. The energy efficiency of the process has been improved by 28%.Background: This activity represents the production of stainless steel (Type 304, aka. 18/8; assumed composition 68.6% Fe, 9.3% Ni, 19.0% Cr …
location	World
reference product	steel, chromium steel 18/8
scenario	SSP2-NPi
type	process
unit	kilogram
worksheet name	steel_prod_SSP2-NPi
year	2050
Exchanges
name	amount	database	location	unit	categories	type	default_amount	reference product
Benzene	3.63318e-07			kilogram	air	biosphere
Benzene, hexachloro-	1.54919e-09			kilogram	air	biosphere
Cadmium II	1.21655e-08			kilogram	air	biosphere
Carbon dioxide, fossil	0.033168			kilogram	air	biosphere
Carbon dioxide, non-fossil	9.475e-05			kilogram	air	biosphere
Carbon monoxide, fossil	0.000474342			kilogram	air	biosphere
Chromium III	1.83303e-07			kilogram	air	biosphere
Copper ion	7.48999e-08			kilogram	air	biosphere
Dioxins, measured as 2,3,7,8-tetrachlorodibenzo-p-dioxin	4.89898e-13			kilogram	air	biosphere
Hydrocarbons, aromatic	7.7008e-05			kilogram	air	biosphere
Hydrochloric acid	5.31037e-06			kilogram	air	biosphere
Hydrogen fluoride	2.44949e-08			kilogram	air	biosphere
Lead II	4.62331e-07			kilogram	air	biosphere
Mercury II	2e-08			kilogram	air	biosphere
Nickel II	7.74597e-08			kilogram	air	biosphere
Nitrogen oxides	7.73305e-05			kilogram	air	biosphere
PAH, polycyclic aromatic hydrocarbons	9.34345e-08			kilogram	air	biosphere
Particulate Matter, < 2.5 um	1.47224e-05			kilogram	air	biosphere
Particulate Matter, > 10 um	5.19615e-06			kilogram	air	biosphere
Particulate Matter, > 2.5 um and < 10um	1.47224e-05			kilogram	air	biosphere
Polychlorinated biphenyls	2.23607e-10			kilogram	air	biosphere
Sulfur dioxide	3.24037e-05			kilogram	air	biosphere
Water	0.0022952			cubic meter	water	biosphere
Water	0.00292117			cubic meter	air	biosphere
Water, cooling, unspecified natural origin	0.00654217			cubic meter	natural resource::in water	biosphere
Zinc II	2.19089e-06			kilogram	air	biosphere
steel production, electric, chromium steel 18/8, pessimistic, 2050	1	steel_prod_SSP2-NPi	World	kilogram		production	1	steel, chromium steel 18/8
market for anode, for metal electrolysis	0.004	remind - SSP2-NPi - 2050	GLO	kilogram		technosphere	0.004	anode, for metal electrolysis
market for argon, liquid	0.032	remind - SSP2-NPi - 2050	RoW	kilogram		technosphere	0.032	argon, liquid
market for electric arc furnace converter	4e-11	remind - SSP2-NPi - 2050	GLO	unit		technosphere	4e-11	electric arc furnace converter
market for electricity, medium voltage	0.000998198	remind - SSP2-NPi - 2050	NZ	kilowatt hour		technosphere	0.000998198	electricity, medium voltage
market for electricity, medium voltage	0.00509321	remind - SSP2-NPi - 2050	AU	kilowatt hour		technosphere	0.00509321	electricity, medium voltage
market for ferrochromium, high-carbon, 68% Cr	0.26471	remind - SSP2-NPi - 2050	GLO	kilogram		technosphere	0.26471	ferrochromium, high-carbon, 68% Cr
market for ferronickel	0.32	remind - SSP2-NPi - 2050	GLO	kilogram		technosphere	0.32	ferronickel
market for hard coal	0.00691265	remind - SSP2-NPi - 2050	RoW	kilogram		technosphere	0.00691265	hard coal
market for hot rolling, steel	1	remind - SSP2-NPi - 2050	GLO	kilogram		technosphere	1	hot rolling, steel
market for inert waste, for final disposal	-0.00678233	remind - SSP2-NPi - 2050	RoW	kilogram		technosphere	-0.00678233	inert waste, for final disposal
market for natural gas, high pressure	0.00564357	remind - SSP2-NPi - 2050	RoW	cubic meter		technosphere	0.00564357	natural gas, high pressure
market for nitrogen, liquid	0.00359723	remind - SSP2-NPi - 2050	RoW	kilogram		technosphere	0.00359723	nitrogen, liquid
market for oxygen, liquid	0.036	remind - SSP2-NPi - 2050	World	kilogram		technosphere	0.036	oxygen, liquid
market for quicklime, in pieces, loose	0.0591608	remind - SSP2-NPi - 2050	RoW	kilogram		technosphere	0.0591608	quicklime, in pieces, loose
market for refractory, basic, packed	0.0154919	remind - SSP2-NPi - 2050	GLO	kilogram		technosphere	0.0154919	refractory, basic, packed
market group for electricity, medium voltage	0.0335191	remind - SSP2-NPi - 2050	RLA	kilowatt hour		technosphere	0.0335191	electricity, medium voltage
market group for electricity, medium voltage	0.107422	remind - SSP2-NPi - 2050	RNA	kilowatt hour		technosphere	0.107422	electricity, medium voltage
market group for electricity, medium voltage	0.016822	remind - SSP2-NPi - 2050	RAF	kilowatt hour		technosphere	0.016822	electricity, medium voltage
market group for electricity, medium voltage	0.30754	remind - SSP2-NPi - 2050	RAS	kilowatt hour		technosphere	0.30754	electricity, medium voltage
preperation for recycling, steel scrap, from fossil infrastructure, 2050	0.55079	steel_prod_SSP2-NPi	GLO	kilogram		technosphere	0.55079	steel scrap, from fossil infrastructure
treatment of electric arc furnace dust, residual material landfill, pessimistic, 2050	-0.0191274	steel_prod_SSP2-NPi	RoW	kilogram		technosphere	-0.0191274	electric arc furnace dust
treatment of electric arc furnace slag, residual material landfill, pessimistic, 2050	-0.165106	steel_prod_SSP2-NPi	GLO	kilogram		technosphere	-0.165106	electric arc furnace slag
Activity	steel production, electric, low-alloyed, optimistic, 2025
code	e8c5fac3388d4a08a96bb0f21e63f60c
comment	This dataset has been modified by `premise`, according to the performance for steel production indicated by the IAM model REMIND for the IAM region World in 2100, following the scenario SSP1-NDC. The energy efficiency of the process has been improved by 10%.This activity represents the production of secondary low-alloyed steel in an electric arc furnace (EAF). The process comprises the following …
location	World
reference product	steel, low-alloyed
scenario	SSP2-NPi
type	process
unit	kilogram
worksheet name	steel_prod_SSP2-NPi
year	2025
Exchanges
name	amount	database	location	unit	categories	type	default_amount	reference product
Antimony ion	4.20301e-10			kilogram	air	biosphere
Argon-40	1.55606e-05			kilogram	air	biosphere
Arsenic ion	4.75423e-10			kilogram	air	biosphere
Benzene	8.48637e-07			kilogram	air	biosphere
Benzene, hexachloro-	6.42293e-09			kilogram	air	biosphere
Cadmium II	1.91118e-08			kilogram	air	biosphere
Cadmium II	1.21518e-09			kilogram	air::urban air close to ground	biosphere
Cadmium II	1.62024e-11			kilogram	water	biosphere
Carbon dioxide, fossil	0.0448951			kilogram	air	biosphere
Carbon dioxide, fossil	0.00494661			kilogram	air::urban air close to ground	biosphere
Carbon dioxide, non-fossil	9.82157e-05			kilogram	air	biosphere
Carbon monoxide, fossil	0.000926546			kilogram	air	biosphere
Carbon monoxide, fossil	4.1135e-05			kilogram	air::urban air close to ground	biosphere
Chloride	7.17664e-05			kilogram	water	biosphere
Chromium III	2.97044e-09			kilogram	air::urban air close to ground	biosphere
Chromium III	4.7308e-07			kilogram	air	biosphere
Chromium VI	7.55436e-08			kilogram	water	biosphere
Chromium VI	2.48047e-10			kilogram	air	biosphere
Cobalt II	2.80201e-10			kilogram	air	biosphere
Copper ion	4.18562e-09			kilogram	air::urban air close to ground	biosphere
Copper ion	7.96923e-09			kilogram	water	biosphere
Copper ion	1.10953e-07			kilogram	air	biosphere
Dioxins, measured as 2,3,7,8-tetrachlorodibenzo-p-dioxin	1.56301e-12			kilogram	air	biosphere
Dioxins, measured as 2,3,7,8-tetrachlorodibenzo-p-dioxin	5.4008e-15			kilogram	air::urban air close to ground	biosphere
Hydrocarbons, aromatic	6.88555e-05			kilogram	air	biosphere
Hydrochloric acid	4.71748e-06			kilogram	air	biosphere
Hydrochloric acid	5.71134e-08			kilogram	air::urban air close to ground	biosphere
Hydrogen fluoride	6.6877e-07			kilogram	air	biosphere
Lead II	1.62024e-09			kilogram	water	biosphere
Lead II	7.97328e-07			kilogram	air	biosphere
Lead II	4.92823e-08			kilogram	air::urban air close to ground	biosphere
Manganese II	7.00502e-10			kilogram	air	biosphere
Mercury II	7.96618e-09			kilogram	air::urban air close to ground	biosphere
Mercury II	6.24269e-07			kilogram	air	biosphere
Mercury II	3.24048e-11			kilogram	water	biosphere
Methane, fossil	2.03852e-06			kilogram	air::urban air close to ground	biosphere
NMVOC, non-methane volatile organic compounds	2.03853e-06			kilogram	air::urban air close to ground	biosphere
Nickel II	2.43483e-07			kilogram	air	biosphere
Nickel II	2.7004e-10			kilogram	air::urban air close to ground	biosphere
Nickel II	3.30869e-10			kilogram	water	biosphere
Nitrogen oxides	7.31565e-06			kilogram	air::urban air close to ground	biosphere
Nitrogen oxides	0.000101937			kilogram	air	biosphere
PAH, polycyclic aromatic hydrocarbons	6.79146e-08			kilogram	air	biosphere
PAH, polycyclic aromatic hydrocarbons	1.14767e-08			kilogram	air::urban air close to ground	biosphere
Particulate Matter, < 2.5 um	5.62815e-05			kilogram	air	biosphere
Particulate Matter, < 2.5 um	7.12244e-07			kilogram	air::urban air close to ground	biosphere
Particulate Matter, > 10 um	2.5138e-07			kilogram	air::urban air close to ground	biosphere
Particulate Matter, > 10 um	1.9494e-05			kilogram	air	biosphere
Particulate Matter, > 2.5 um and < 10um	5.6355e-05			kilogram	air	biosphere
Particulate Matter, > 2.5 um and < 10um	7.12244e-07			kilogram	air::urban air close to ground	biosphere
Phosphorus	1.97059e-11			kilogram	water	biosphere
Polychlorinated biphenyls	6.49506e-09			kilogram	air	biosphere
Polychlorinated biphenyls	7.4261e-11			kilogram	air::urban air close to ground	biosphere
Selenium IV	2.80201e-10			kilogram	air	biosphere
Sulfate	5.12171e-08			kilogram	water	biosphere
Sulfur dioxide	1.90243e-07			kilogram	air::urban air close to ground	biosphere
Sulfur dioxide	5.20581e-05			kilogram	air	biosphere
Tellurium	5.62699e-10			kilogram	air	biosphere
Tin ion	7.00502e-10			kilogram	air	biosphere
Titanium ion	2.80201e-10			kilogram	air	biosphere
Vanadium V	7.00502e-10			kilogram	air	biosphere
Water	0.00147176			cubic meter	water	biosphere
Water	7.22231e-05			cubic meter	air::urban air close to ground	biosphere
Water	0.00887165			cubic meter	air	biosphere
Water, cooling, unspecified natural origin	0.00417675			cubic meter	natural resource::in water	biosphere
Water, unspecified natural origin	0.0352786			cubic meter	natural resource::in ground	biosphere
Zinc II	7.24922e-07			kilogram	air::urban air close to ground	biosphere
Zinc II	7.84638e-06			kilogram	air	biosphere
Zinc II	2.66075e-08			kilogram	water	biosphere
steel production, electric, low-alloyed, optimistic, 2025	1	steel_prod_SSP2-NPi	World	kilogram		production	1	steel, low-alloyed
electric arc furnace slag, for recovery, Recycled Content cut-off	-0.00399409	remind - SSP2-NPi - 2025	GLO	kilogram		technosphere	-0.00399409	electric arc furnace slag, for recovery
market for aluminium, cast alloy	0.000108691	remind - SSP2-NPi - 2025	GLO	kilogram		technosphere	0.000108691	aluminium, cast alloy
market for aluminium, primary, ingot	4.36378e-07	remind - SSP2-NPi - 2025	RoW	kilogram		technosphere	4.36378e-07	aluminium, primary, ingot
market for aluminium, wrought alloy	0.000108068	remind - SSP2-NPi - 2025	GLO	kilogram		technosphere	0.000108068	aluminium, wrought alloy
market for anode, for metal electrolysis	0.00234417	remind - SSP2-NPi - 2025	GLO	kilogram		technosphere	0.00234417	anode, for metal electrolysis
market for argon, liquid	0.000690895	remind - SSP2-NPi - 2025	RoW	kilogram		technosphere	0.000690895	argon, liquid
market for calcium carbide, technical grade	3.16949e-06	remind - SSP2-NPi - 2025	RoW	kilogram		technosphere	3.16949e-06	calcium carbide, technical grade
market for cast iron	0	remind - SSP2-NPi - 2025	GLO	kilogram		technosphere	0	cast iron
market for chemical, inorganic	1.82263e-06	remind - SSP2-NPi - 2025	GLO	kilogram		technosphere	1.82263e-06	chemical, inorganic
market for coke	0.00332933	remind - SSP2-NPi - 2025	GLO	megajoule		technosphere	0.00299928	coke
market for diesel, burned in building machine	1.62016e-05	remind - SSP2-NPi - 2025	World	megajoule		technosphere	1.45954e-05	diesel, burned in building machine
market for dolomite	0.0120311	remind - SSP2-NPi - 2025	RoW	kilogram		technosphere	0.0120311	dolomite
market for electric arc furnace converter	4.02495e-11	remind - SSP2-NPi - 2025	GLO	unit		technosphere	4.02495e-11	electric arc furnace converter
market for electric arc furnace dust	0	remind - SSP2-NPi - 2025	RoW	kilogram		technosphere	0	electric arc furnace dust
market for electric arc furnace secondary metallurgy slag	0	remind - SSP2-NPi - 2025	RoW	kilogram		technosphere	0	electric arc furnace secondary metallurgy slag
market for electric arc furnace slag	0	remind - SSP2-NPi - 2025	RoW	kilogram		technosphere	0	electric arc furnace slag
market for electricity, high voltage	7.34725e-06	remind - SSP2-NPi - 2025	KP	kilowatt hour		technosphere	6.61888e-06	electricity, high voltage
market for electricity, high voltage	0.000471592	remind - SSP2-NPi - 2025	JP	kilowatt hour		technosphere	0.000424841	electricity, high voltage
market for electricity, high voltage	2.02352e-05	remind - SSP2-NPi - 2025	OM	kilowatt hour		technosphere	1.82291e-05	electricity, high voltage
market for electricity, high voltage	0.000122632	remind - SSP2-NPi - 2025	AU	kilowatt hour		technosphere	0.000110475	electricity, high voltage
market for electricity, high voltage	5.58122e-05	remind - SSP2-NPi - 2025	KZ	kilowatt hour		technosphere	5.02792e-05	electricity, high voltage
market for electricity, high voltage	2.40065e-05	remind - SSP2-NPi - 2025	NZ	kilowatt hour		technosphere	2.16266e-05	electricity, high voltage
market for electricity, high voltage	2.71236e-05	remind - SSP2-NPi - 2025	HK	kilowatt hour		technosphere	2.44347e-05	electricity, high voltage
market for electricity, high voltage	8.19579e-06	remind - SSP2-NPi - 2025	KG	kilowatt hour		technosphere	7.3833e-06	electricity, high voltage
market for electricity, high voltage	1.00383e-05	remind - SSP2-NPi - 2025	BH	kilowatt hour		technosphere	9.04311e-06	electricity, high voltage
market for electricity, high voltage	2.69959e-06	remind - SSP2-NPi - 2025	CY	kilowatt hour		technosphere	2.43196e-06	electricity, high voltage
market for electricity, high voltage	8.9857e-05	remind - SSP2-NPi - 2025	MY	kilowatt hour		technosphere	8.0949e-05	electricity, high voltage
market for electricity, high voltage	4.20953e-06	remind - SSP2-NPi - 2025	NP	kilowatt hour		technosphere	3.79222e-06	electricity, high voltage
market for electricity, high voltage	0.000100529	remind - SSP2-NPi - 2025	ID	kilowatt hour		technosphere	9.05628e-05	electricity, high voltage
market for electricity, high voltage	1.1965e-05	remind - SSP2-NPi - 2025	AZ	kilowatt hour		technosphere	1.07788e-05	electricity, high voltage
market for electricity, high voltage	2.11845e-06	remind - SSP2-NPi - 2025	BN	kilowatt hour		technosphere	1.90844e-06	electricity, high voltage
market for electricity, high voltage	0.000122282	remind - SSP2-NPi - 2025	VN	kilowatt hour		technosphere	0.000110159	electricity, high voltage
market for electricity, high voltage	6.3224e-05	remind - SSP2-NPi - 2025	TH	kilowatt hour		technosphere	5.69563e-05	electricity, high voltage
market for electricity, high voltage	5.55282e-05	remind - SSP2-NPi - 2025	PH	kilowatt hour		technosphere	5.00234e-05	electricity, high voltage
market for electricity, high voltage	1.036e-06	remind - SSP2-NPi - 2025	QA	kilowatt hour		technosphere	9.33293e-07	electricity, high voltage
market for electricity, high voltage	6.3958e-06	remind - SSP2-NPi - 2025	KH	kilowatt hour		technosphere	5.76175e-06	electricity, high voltage
market for electricity, high voltage	9.76436e-06	remind - SSP2-NPi - 2025	TJ	kilowatt hour		technosphere	8.79637e-06	electricity, high voltage
market for electricity, high voltage	7.04425e-05	remind - SSP2-NPi - 2025	PK	kilowatt hour		technosphere	6.34591e-05	electricity, high voltage
market for electricity, high voltage	3.27437e-05	remind - SSP2-NPi - 2025	IL	kilowatt hour		technosphere	2.94977e-05	electricity, high voltage
market for electricity, high voltage	9.85571e-06	remind - SSP2-NPi - 2025	TM	kilowatt hour		technosphere	8.87866e-06	electricity, high voltage
market for electricity, high voltage	1.23145e-05	remind - SSP2-NPi - 2025	MM	kilowatt hour		technosphere	1.10937e-05	electricity, high voltage
market for electricity, high voltage	2.50564e-05	remind - SSP2-NPi - 2025	SG	kilowatt hour		technosphere	2.25724e-05	electricity, high voltage
market for electricity, high voltage	0.000298233	remind - SSP2-NPi - 2025	KR	kilowatt hour		technosphere	0.000268667	electricity, high voltage
market for electricity, high voltage	0.000126018	remind - SSP2-NPi - 2025	TW	kilowatt hour		technosphere	0.000113525	electricity, high voltage
market for electricity, high voltage	6.43726e-06	remind - SSP2-NPi - 2025	GE	kilowatt hour		technosphere	5.7991e-06	electricity, high voltage
market for electricity, high voltage	7.82947e-06	remind - SSP2-NPi - 2025	LB	kilowatt hour		technosphere	7.0533e-06	electricity, high voltage
market for electricity, high voltage	3.93291e-05	remind - SSP2-NPi - 2025	BD	kilowatt hour		technosphere	3.54302e-05	electricity, high voltage
market for electricity, high voltage	1.40788e-06	remind - SSP2-NPi - 2025	YE	kilowatt hour		technosphere	1.26831e-06	electricity, high voltage
market for electricity, high voltage	8.19102e-06	remind - SSP2-NPi - 2025	LK	kilowatt hour		technosphere	7.379e-06	electricity, high voltage
market for electricity, high voltage	8.38672e-06	remind - SSP2-NPi - 2025	SY	kilowatt hour		technosphere	7.5553e-06	electricity, high voltage
market for electricity, high voltage	3.59154e-06	remind - SSP2-NPi - 2025	AM	kilowatt hour		technosphere	3.23549e-06	electricity, high voltage
market for electricity, high voltage	3.47041e-05	remind - SSP2-NPi - 2025	UZ	kilowatt hour		technosphere	3.12637e-05	electricity, high voltage
market for electricity, high voltage	9.29135e-06	remind - SSP2-NPi - 2025	JO	kilowatt hour		technosphere	8.37025e-06	electricity, high voltage
market for electricity, high voltage	0.000147174	remind - SSP2-NPi - 2025	TR	kilowatt hour		technosphere	0.000132584	electricity, high voltage
market for electricity, high voltage	4.57147e-06	remind - SSP2-NPi - 2025	MN	kilowatt hour		technosphere	4.11828e-06	electricity, high voltage
market for electricity, low voltage	1.54936e-07	remind - SSP2-NPi - 2025	JO	kilowatt hour		technosphere	1.39576e-07	electricity, low voltage
market for electricity, low voltage	3.15726e-08	remind - SSP2-NPi - 2025	BN	kilowatt hour		technosphere	2.84426e-08	electricity, low voltage
market for electricity, low voltage	8.44093e-07	remind - SSP2-NPi - 2025	KZ	kilowatt hour		technosphere	7.60414e-07	electricity, low voltage
market for electricity, low voltage	1.90869e-06	remind - SSP2-NPi - 2025	VN	kilowatt hour		technosphere	1.71947e-06	electricity, low voltage
market for electricity, low voltage	1.59172e-08	remind - SSP2-NPi - 2025	QA	kilowatt hour		technosphere	1.43392e-08	electricity, low voltage
market for electricity, low voltage	8.02443e-06	remind - SSP2-NPi - 2025	JP	kilowatt hour		technosphere	7.22893e-06	electricity, low voltage
market for electricity, low voltage	5.36768e-07	remind - SSP2-NPi - 2025	IL	kilowatt hour		technosphere	4.83556e-07	electricity, low voltage
market for electricity, low voltage	4.22588e-07	remind - SSP2-NPi - 2025	HK	kilowatt hour		technosphere	3.80695e-07	electricity, low voltage
market for electricity, low voltage	1.37609e-06	remind - SSP2-NPi - 2025	MY	kilowatt hour		technosphere	1.23967e-06	electricity, low voltage
market for electricity, low voltage	1.51604e-06	remind - SSP2-NPi - 2025	ID	kilowatt hour		technosphere	1.36575e-06	electricity, low voltage
market for electricity, low voltage	1.41457e-07	remind - SSP2-NPi - 2025	TM	kilowatt hour		technosphere	1.27433e-07	electricity, low voltage
market for electricity, low voltage	2.02039e-06	remind - SSP2-NPi - 2025	AU	kilowatt hour		technosphere	1.8201e-06	electricity, low voltage
market for electricity, low voltage	4.39189e-08	remind - SSP2-NPi - 2025	CY	kilowatt hour		technosphere	3.9565e-08	electricity, low voltage
market for electricity, low voltage	9.61134e-08	remind - SSP2-NPi - 2025	KH	kilowatt hour		technosphere	8.65851e-08	electricity, low voltage
market for electricity, low voltage	1.41695e-07	remind - SSP2-NPi - 2025	TJ	kilowatt hour		technosphere	1.27648e-07	electricity, low voltage
market for electricity, low voltage	1.1629e-07	remind - SSP2-NPi - 2025	KG	kilowatt hour		technosphere	1.04761e-07	electricity, low voltage
market for electricity, low voltage	1.24482e-07	remind - SSP2-NPi - 2025	LK	kilowatt hour		technosphere	1.12142e-07	electricity, low voltage
market for electricity, low voltage	8.41681e-07	remind - SSP2-NPi - 2025	PH	kilowatt hour		technosphere	7.5824e-07	electricity, low voltage
market for electricity, low voltage	5.27228e-07	remind - SSP2-NPi - 2025	UZ	kilowatt hour		technosphere	4.74961e-07	electricity, low voltage
market for electricity, low voltage	1.05056e-07	remind - SSP2-NPi - 2025	KP	kilowatt hour		technosphere	9.46409e-08	electricity, low voltage
market for electricity, low voltage	1.79862e-07	remind - SSP2-NPi - 2025	AZ	kilowatt hour		technosphere	1.62031e-07	electricity, low voltage
market for electricity, low voltage	2.00037e-06	remind - SSP2-NPi - 2025	TW	kilowatt hour		technosphere	1.80206e-06	electricity, low voltage
market for electricity, low voltage	3.67417e-07	remind - SSP2-NPi - 2025	NZ	kilowatt hour		technosphere	3.30993e-07	electricity, low voltage
market for electricity, low voltage	1.005e-06	remind - SSP2-NPi - 2025	TH	kilowatt hour		technosphere	9.05372e-07	electricity, low voltage
market for electricity, low voltage	4.10046e-07	remind - SSP2-NPi - 2025	SG	kilowatt hour		technosphere	3.69396e-07	electricity, low voltage
market for electricity, low voltage	1.77765e-07	remind - SSP2-NPi - 2025	MM	kilowatt hour		technosphere	1.60142e-07	electricity, low voltage
market for electricity, low voltage	2.30185e-08	remind - SSP2-NPi - 2025	YE	kilowatt hour		technosphere	2.07366e-08	electricity, low voltage
market for electricity, low voltage	5.47171e-08	remind - SSP2-NPi - 2025	AM	kilowatt hour		technosphere	4.92927e-08	electricity, low voltage
market for electricity, low voltage	9.72895e-08	remind - SSP2-NPi - 2025	GE	kilowatt hour		technosphere	8.76447e-08	electricity, low voltage
market for electricity, low voltage	1.17261e-07	remind - SSP2-NPi - 2025	LB	kilowatt hour		technosphere	1.05637e-07	electricity, low voltage
market for electricity, low voltage	5.88548e-07	remind - SSP2-NPi - 2025	BD	kilowatt hour		technosphere	5.30202e-07	electricity, low voltage
market for electricity, low voltage	4.76373e-06	remind - SSP2-NPi - 2025	KR	kilowatt hour		technosphere	4.29148e-06	electricity, low voltage
market for electricity, low voltage	1.03288e-06	remind - SSP2-NPi - 2025	PK	kilowatt hour		technosphere	9.30483e-07	electricity, low voltage
market for electricity, low voltage	1.14434e-07	remind - SSP2-NPi - 2025	SY	kilowatt hour		technosphere	1.03089e-07	electricity, low voltage
market for electricity, low voltage	2.26588e-06	remind - SSP2-NPi - 2025	TR	kilowatt hour		technosphere	2.04125e-06	electricity, low voltage
market for electricity, low voltage	1.57994e-07	remind - SSP2-NPi - 2025	BH	kilowatt hour		technosphere	1.42331e-07	electricity, low voltage
market for electricity, low voltage	6.87043e-08	remind - SSP2-NPi - 2025	MN	kilowatt hour		technosphere	6.18933e-08	electricity, low voltage
market for electricity, low voltage	3.02294e-07	remind - SSP2-NPi - 2025	OM	kilowatt hour		technosphere	2.72326e-07	electricity, low voltage
market for electricity, low voltage	6.04712e-08	remind - SSP2-NPi - 2025	NP	kilowatt hour		technosphere	5.44763e-08	electricity, low voltage
market for electricity, medium voltage	0.00561731	remind - SSP2-NPi - 2025	VN	kilowatt hour		technosphere	0.00506043	electricity, medium voltage
market for electricity, medium voltage	0.000124302	remind - SSP2-NPi - 2025	CY	kilowatt hour		technosphere	0.000111979	electricity, medium voltage
market for electricity, medium voltage	0.0015945	remind - SSP2-NPi - 2025	UZ	kilowatt hour		technosphere	0.00143643	electricity, medium voltage
market for electricity, medium voltage	0.000445141	remind - SSP2-NPi - 2025	TJ	kilowatt hour		technosphere	0.000401012	electricity, medium voltage
market for electricity, medium voltage	0.0046123	remind - SSP2-NPi - 2025	ID	kilowatt hour		technosphere	0.00415506	electricity, medium voltage
market for electricity, medium voltage	0.000372246	remind - SSP2-NPi - 2025	KG	kilowatt hour		technosphere	0.000335343	electricity, medium voltage
market for electricity, medium voltage	0.00289857	remind - SSP2-NPi - 2025	TH	kilowatt hour		technosphere	0.00261121	electricity, medium voltage
market for electricity, medium voltage	0.00254362	remind - SSP2-NPi - 2025	PH	kilowatt hour		technosphere	0.00229146	electricity, medium voltage
market for electricity, medium voltage	4.76931e-05	remind - SSP2-NPi - 2025	QA	kilowatt hour		technosphere	4.2965e-05	electricity, medium voltage
market for electricity, medium voltage	0.000292769	remind - SSP2-NPi - 2025	KH	kilowatt hour		technosphere	0.000263745	electricity, medium voltage
market for electricity, medium voltage	0.00118873	remind - SSP2-NPi - 2025	SG	kilowatt hour		technosphere	0.00107089	electricity, medium voltage
market for electricity, medium voltage	0.0137499	remind - SSP2-NPi - 2025	KR	kilowatt hour		technosphere	0.0123868	electricity, medium voltage
market for electricity, medium voltage	0.00581369	remind - SSP2-NPi - 2025	TW	kilowatt hour		technosphere	0.00523735	electricity, medium voltage
market for electricity, medium voltage	0.00110368	remind - SSP2-NPi - 2025	NZ	kilowatt hour		technosphere	0.000994268	electricity, medium voltage
market for electricity, medium voltage	0.000295498	remind - SSP2-NPi - 2025	GE	kilowatt hour		technosphere	0.000266204	electricity, medium voltage
market for electricity, medium voltage	0.000358333	remind - SSP2-NPi - 2025	LB	kilowatt hour		technosphere	0.00032281	electricity, medium voltage
market for electricity, medium voltage	0.00150609	remind - SSP2-NPi - 2025	IL	kilowatt hour		technosphere	0.00135678	electricity, medium voltage
market for electricity, medium voltage	0.000448485	remind - SSP2-NPi - 2025	TM	kilowatt hour		technosphere	0.000404024	electricity, medium voltage
market for electricity, medium voltage	0.000560672	remind - SSP2-NPi - 2025	MM	kilowatt hour		technosphere	0.00050509	electricity, medium voltage
market for electricity, medium voltage	6.27497e-05	remind - SSP2-NPi - 2025	YE	kilowatt hour		technosphere	5.6529e-05	electricity, medium voltage
market for electricity, medium voltage	0.00321319	remind - SSP2-NPi - 2025	PK	kilowatt hour		technosphere	0.00289465	electricity, medium voltage
market for electricity, medium voltage	0.000164746	remind - SSP2-NPi - 2025	AM	kilowatt hour		technosphere	0.000148414	electricity, medium voltage
market for electricity, medium voltage	0.000548481	remind - SSP2-NPi - 2025	AZ	kilowatt hour		technosphere	0.000494107	electricity, medium voltage
market for electricity, medium voltage	0.00672444	remind - SSP2-NPi - 2025	TR	kilowatt hour		technosphere	0.00605781	electricity, medium voltage
market for electricity, medium voltage	0.00180017	remind - SSP2-NPi - 2025	BD	kilowatt hour		technosphere	0.00162171	electricity, medium voltage
market for electricity, medium voltage	0.000378521	remind - SSP2-NPi - 2025	SY	kilowatt hour		technosphere	0.000340996	electricity, medium voltage
market for electricity, medium voltage	0.000464096	remind - SSP2-NPi - 2025	BH	kilowatt hour		technosphere	0.000418088	electricity, medium voltage
market for electricity, medium voltage	0.000375773	remind - SSP2-NPi - 2025	LK	kilowatt hour		technosphere	0.000338521	electricity, medium voltage
market for electricity, medium voltage	0.000422106	remind - SSP2-NPi - 2025	JO	kilowatt hour		technosphere	0.000380261	electricity, medium voltage
market for electricity, medium voltage	0.0220102	remind - SSP2-NPi - 2025	JP	kilowatt hour		technosphere	0.0198282	electricity, medium voltage
market for electricity, medium voltage	0.000334035	remind - SSP2-NPi - 2025	KP	kilowatt hour		technosphere	0.000300921	electricity, medium voltage
market for electricity, medium voltage	9.7004e-05	remind - SSP2-NPi - 2025	BN	kilowatt hour		technosphere	8.73875e-05	electricity, medium voltage
market for electricity, medium voltage	0.000209182	remind - SSP2-NPi - 2025	MN	kilowatt hour		technosphere	0.000188444	electricity, medium voltage
market for electricity, medium voltage	0.000927007	remind - SSP2-NPi - 2025	OM	kilowatt hour		technosphere	0.000835108	electricity, medium voltage
market for electricity, medium voltage	0.00255754	remind - SSP2-NPi - 2025	KZ	kilowatt hour		technosphere	0.00230399	electricity, medium voltage
market for electricity, medium voltage	0.00125169	remind - SSP2-NPi - 2025	HK	kilowatt hour		technosphere	0.00112761	electricity, medium voltage
market for electricity, medium voltage	0.000191579	remind - SSP2-NPi - 2025	NP	kilowatt hour		technosphere	0.000172587	electricity, medium voltage
market for electricity, medium voltage	0.00563144	remind - SSP2-NPi - 2025	AU	kilowatt hour		technosphere	0.00507316	electricity, medium voltage
market for electricity, medium voltage	0.00412886	remind - SSP2-NPi - 2025	MY	kilowatt hour		technosphere	0.00371954	electricity, medium voltage
market for electrode, negative, Ni	0.000367128	remind - SSP2-NPi - 2025	GLO	kilogram		technosphere	0.000367128	electrode, negative, Ni
market for ethylene glycol	2.22266e-08	remind - SSP2-NPi - 2025	GLO	kilogram		technosphere	2.22266e-08	ethylene glycol
market for ferrochromium, high-carbon, 68% Cr	0	remind - SSP2-NPi - 2025	GLO	kilogram		technosphere	0	ferrochromium, high-carbon, 68% Cr
market for ferromanganese, high-coal, 74.5% Mn	0	remind - SSP2-NPi - 2025	GLO	kilogram		technosphere	0	ferromanganese, high-coal, 74.5% Mn
market for ferrosilicon	0	remind - SSP2-NPi - 2025	GLO	kilogram		technosphere	0	ferrosilicon
market for fluorspar, 97% purity	1.5411e-05	remind - SSP2-NPi - 2025	GLO	kilogram		technosphere	1.5411e-05	fluorspar, 97% purity
market for hard coal	0.00721441	remind - SSP2-NPi - 2025	RoW	kilogram		technosphere	0.00649921	hard coal
market for heat, district or industrial, natural gas	0.0114557	remind - SSP2-NPi - 2025	RoW	megajoule		technosphere	0.01032	heat, district or industrial, natural gas
market for heat, district or industrial, other than natural gas	0.00323011	remind - SSP2-NPi - 2025	RoW	megajoule		technosphere	0.0029099	heat, district or industrial, other than natural gas
market for heavy fuel oil	0.000125876	remind - SSP2-NPi - 2025	RoW	kilogram		technosphere	0.000113397	heavy fuel oil
market for hot rolling, steel	1	remind - SSP2-NPi - 2025	GLO	kilogram		technosphere	1	hot rolling, steel
market for hydrochloric acid, without water, in 30% solution state	1.23711e-05	remind - SSP2-NPi - 2025	RoW	kilogram		technosphere	1.23711e-05	hydrochloric acid, without water, in 30% solution state
market for inert waste	-0.000696008	remind - SSP2-NPi - 2025	RoW	kilogram		technosphere	-0.000696008	inert waste
market for inert waste, for final disposal	-0.00734125	remind - SSP2-NPi - 2025	RoW	kilogram		technosphere	-0.00734125	inert waste, for final disposal
market for iron scrap, sorted, pressed	0	remind - SSP2-NPi - 2025	RoW	kilogram		technosphere	0	iron scrap, sorted, pressed
market for iron scrap, unsorted	0	remind - SSP2-NPi - 2025	GLO	kilogram		technosphere	0	iron scrap, unsorted
market for lime	0.0132342	remind - SSP2-NPi - 2025	RoW	kilogram		technosphere	0.0132342	lime
market for liquefied petroleum gas	0.000214812	remind - SSP2-NPi - 2025	RoW	kilogram		technosphere	0.000193516	liquefied petroleum gas
market for lubricating oil	0.021116	remind - SSP2-NPi - 2025	RoW	kilogram		technosphere	0.0190226	lubricating oil
market for molybdenum trioxide	0	remind - SSP2-NPi - 2025	GLO	kilogram		technosphere	0	molybdenum trioxide
market for natural gas, high pressure	0.00649376	remind - SSP2-NPi - 2025	RoW	cubic meter		technosphere	0.00585	natural gas, high pressure
market for nickel, class 1	0	remind - SSP2-NPi - 2025	GLO	kilogram		technosphere	0	nickel, class 1
market for nitrogen, liquid	0.0120712	remind - SSP2-NPi - 2025	RoW	kilogram		technosphere	0.0120712	nitrogen, liquid
market for oxygen, liquid	0.0359034	remind - SSP2-NPi - 2025	World	kilogram		technosphere	0.0359034	oxygen, liquid
market for pig iron	0	remind - SSP2-NPi - 2025	World	kilogram		technosphere	0	pig iron
market for propane, burned in building machine	1.29106e-05	remind - SSP2-NPi - 2025	GLO	megajoule		technosphere	1.29106e-05	propane, burned in building machine
market for quicklime, in pieces, loose	0.0413549	remind - SSP2-NPi - 2025	RoW	kilogram		technosphere	0.0413549	quicklime, in pieces, loose
market for refractory, basic, packed	0.0145136	remind - SSP2-NPi - 2025	GLO	kilogram		technosphere	0.0145136	refractory, basic, packed
market for silica sand	2.11069e-05	remind - SSP2-NPi - 2025	GLO	kilogram		technosphere	2.11069e-05	silica sand
market for spent solvent mixture	-2.22266e-08	remind - SSP2-NPi - 2025	RoW	kilogram		technosphere	-2.22266e-08	spent solvent mixture
market for sponge iron	0	remind - SSP2-NPi - 2025	GLO	kilogram		technosphere	0	sponge iron
market for sulfur dioxide, liquid	8.61273e-06	remind - SSP2-NPi - 2025	RoW	kilogram		technosphere	8.61273e-06	sulfur dioxide, liquid
market for sulfuric acid	6.75775e-06	remind - SSP2-NPi - 2025	RoW	kilogram		technosphere	6.75775e-06	sulfuric acid
market for wastewater from pig iron production	-0.028223	remind - SSP2-NPi - 2025	RoW	cubic meter		technosphere	-0.028223	wastewater from pig iron production
market group for electricity, high voltage	0.000191016	remind - SSP2-NPi - 2025	Canada without Quebec	kilowatt hour		technosphere	0.000172079	electricity, high voltage
market group for electricity, high voltage	0.00040867	remind - SSP2-NPi - 2025	RAF	kilowatt hour		technosphere	0.000368156	electricity, high voltage
market group for electricity, high voltage	0.000815925	remind - SSP2-NPi - 2025	RLA	kilowatt hour		technosphere	0.000735038	electricity, high voltage
market group for electricity, high voltage	0.000460268	remind - SSP2-NPi - 2025	RME	kilowatt hour		technosphere	0.000414639	electricity, high voltage
market group for electricity, high voltage	0.00427049	remind - SSP2-NPi - 2025	CN	kilowatt hour		technosphere	0.00384713	electricity, high voltage
market group for electricity, high voltage	0.00227711	remind - SSP2-NPi - 2025	US	kilowatt hour		technosphere	0.00205136	electricity, high voltage
market group for electricity, low voltage	1.17905e-05	remind - SSP2-NPi - 2025	RLA	kilowatt hour		technosphere	1.06217e-05	electricity, low voltage
market group for electricity, low voltage	6.55855e-05	remind - SSP2-NPi - 2025	CN	kilowatt hour		technosphere	5.90837e-05	electricity, low voltage
market group for electricity, low voltage	6.83821e-06	remind - SSP2-NPi - 2025	RME	kilowatt hour		technosphere	6.1603e-06	electricity, low voltage
market group for electricity, low voltage	3.58941e-05	remind - SSP2-NPi - 2025	US	kilowatt hour		technosphere	3.23357e-05	electricity, low voltage
market group for electricity, low voltage	2.95392e-06	remind - SSP2-NPi - 2025	Canada without Quebec	kilowatt hour		technosphere	2.66109e-06	electricity, low voltage
market group for electricity, low voltage	5.94949e-06	remind - SSP2-NPi - 2025	RAF	kilowatt hour		technosphere	5.35969e-06	electricity, low voltage
market group for electricity, medium voltage	0.021019	remind - SSP2-NPi - 2025	RME	kilowatt hour		technosphere	0.0189353	electricity, medium voltage
market group for electricity, medium voltage	0.0370612	remind - SSP2-NPi - 2025	RLA	kilowatt hour		technosphere	0.0333871	electricity, medium voltage
market group for electricity, medium voltage	0.105089	remind - SSP2-NPi - 2025	US	kilowatt hour		technosphere	0.0946714	electricity, medium voltage
market group for electricity, medium voltage	0.196582	remind - SSP2-NPi - 2025	CN	kilowatt hour		technosphere	0.177094	electricity, medium voltage
market group for electricity, medium voltage	0.0185997	remind - SSP2-NPi - 2025	RAF	kilowatt hour		technosphere	0.0167558	electricity, medium voltage
market group for electricity, medium voltage	0.00879503	remind - SSP2-NPi - 2025	Canada without Quebec	kilowatt hour		technosphere	0.00792313	electricity, medium voltage
preperation for recycling, steel scrap, from fossil infrastructure, 2025	1.18008	steel_prod_SSP2-NPi	GLO	kilogram		technosphere	1.18008	steel scrap, from fossil infrastructure
treatment of electric arc furnace dust, residual material landfill, optimistic, 2025	-0.0280052	steel_prod_SSP2-NPi	RoW	kilogram		technosphere	-0.0280052	electric arc furnace dust
treatment of electric arc furnace slag, residual material landfill, optimistic, 2025	-0.105263	steel_prod_SSP2-NPi	GLO	kilogram		technosphere	-0.105263	electric arc furnace slag
Activity	steel production, electric, low-alloyed, optimistic, 2030
code	2a7fd336c86748938acd11ad91ec9149
comment	This dataset has been modified by `premise`, according to the performance for steel production indicated by the IAM model REMIND for the IAM region World in 2100, following the scenario SSP1-NDC. The energy efficiency of the process has been improved by 10%.This activity represents the production of secondary low-alloyed steel in an electric arc furnace (EAF). The process comprises the following …
location	World
reference product	steel, low-alloyed
scenario	SSP2-NPi
type	process
unit	kilogram
worksheet name	steel_prod_SSP2-NPi
year	2030
Exchanges
name	amount	database	location	unit	categories	type	default_amount	reference product
Antimony ion	4.20301e-10			kilogram	air	biosphere
Argon-40	1.55606e-05			kilogram	air	biosphere
Arsenic ion	4.75423e-10			kilogram	air	biosphere
Benzene	8.48637e-07			kilogram	air	biosphere
Benzene, hexachloro-	6.42293e-09			kilogram	air	biosphere
Cadmium II	1.91118e-08			kilogram	air	biosphere
Cadmium II	1.21518e-09			kilogram	air::urban air close to ground	biosphere
Cadmium II	1.62024e-11			kilogram	water	biosphere
Carbon dioxide, fossil	0.0448951			kilogram	air	biosphere
Carbon dioxide, fossil	0.00494661			kilogram	air::urban air close to ground	biosphere
Carbon dioxide, non-fossil	9.82157e-05			kilogram	air	biosphere
Carbon monoxide, fossil	0.000926546			kilogram	air	biosphere
[truncated: 9,210 more rows]
