# Supplementary material for: Digesting fossil infrastructure for cleaner energy transitions
Source: Research Square preprint supplement (doi:10.21203/rs.3.rs-6346491/v1), 2025-06-06
Supplement: Supplementary file 97 [file lci-steel_prod_SSP2-NPi_2025.xlsx]

## Sheet: steel_prod_SSP2-NPi_2025
Database	steel_prod_SSP2-NPi_2025
format	Brightway2 copy
Activity	preperation for recycling, steel scrap, from fossil infrastructure, 2025
code	cdddcbcb6f814206b85bed72e4adf723
location	GLO
reference product	steel scrap, from fossil infrastructure
scenario	SSP2-NPi
type	process
unit	kilogram
worksheet name	steel_prod_SSP2-NPi
year	2025
Exchanges
name	amount	database	location	unit	type	default_amount	reference product
preperation for recycling, steel scrap, from fossil infrastructure, 2025	1	steel_prod_SSP2-NPi	GLO	kilogram	production	1	steel scrap, from fossil infrastructure
sorting and pressing of metal scrap, 2025	1	steel_prod_SSP2-NPi	GLO	kilogram	technosphere	1	sorting and pressing of metal scrap
transport of steel scrap, from fossil infrastructure, cut-off, 2025	1	steel_prod_SSP2-NPi	GLO	kilogram	technosphere	1	steel scrap, from fossil infrastructure, cut-off
Activity	reinforcing steel production, converter, 2025
code	31f157905c3e44a1a95583de072493d3
comment	Based on "reinforcing steel production" in ecoinvent 3.9.1 cutoff. Market mix of unalloyed and low-alloyed steel substituted with primary equivalent.
location	GLO
production amount	1
reference product	reinforcing steel
scenario	SSP2-NPi
type	process
unit	kilogram
worksheet name	steel_prod_SSP2-NPi
year	2025
Exchanges
name	amount	database	location	unit	type	default_amount	reference product
reinforcing steel production, converter, 2025	1	steel_prod_SSP2-NPi	GLO	kilogram	production	1	reinforcing steel
market for hot rolling, steel	1	remind - SSP2-NPi - 2025	GLO	kilogram	technosphere	1	hot rolling, steel
steel production, converter, low-alloyed, 2025	0.37	steel_prod_SSP2-NPi	World	kilogram	technosphere	0.37	steel, low-alloyed
steel production, converter, unalloyed	0.63	remind - SSP2-NPi - 2025	World	kilogram	technosphere	0.63	steel, unalloyed
Activity	sorting and pressing of metal scrap, 2025
code	2908181e34534289ac9580fb79d466b4
location	GLO
reference product	sorting and pressing of metal scrap
scenario	SSP2-NPi
type	process
unit	kilogram
worksheet name	steel_prod_SSP2-NPi
year	2025
Exchanges
name	amount	database	location	unit	type	default_amount	reference product
sorting and pressing of metal scrap, 2025	1	steel_prod_SSP2-NPi	GLO	kilogram	production	1	sorting and pressing of metal scrap
diesel, burned in building machine	0.1	remind - SSP2-NPi - 2025	GLO	megajoule	technosphere	0.1	diesel, burned in building machine
market for scrap preparation facility	1e-09	remind - SSP2-NPi - 2025	GLO	unit	technosphere	1e-09	scrap preparation facility
market group for electricity, medium voltage	0.01	remind - SSP2-NPi - 2025	GLO	kilowatt hour	technosphere	0.01	electricity, medium voltage
Activity	steel production, converter, low-alloyed, 2025
code	6c7dc8edc2594dfba72b1345367ef7e7
comment	This dataset has been modified by `premise`, according to the performance for steel production indicated by the IAM model REMIND for the IAM region World in 2100, following the scenario SSP1-NDC. The energy efficiency of the process has been improved by 12%."Background: This activity represents the production of primary low-alloyed steel in a basic oxygen furnace (BOF), a discontinuous process in…
location	World
reference product	steel, low-alloyed
scenario	SSP2-NPi
type	process
unit	kilogram
worksheet name	steel_prod_SSP2-NPi
year	2025
Exchanges
name	amount	database	location	unit	categories	type	default_amount	reference product
Carbon dioxide, fossil	0.0626236			kilogram	air	biosphere
Carbon dioxide, non-fossil	2.04331e-05			kilogram	air	biosphere
Carbon monoxide, fossil	0.00168214			kilogram	air	biosphere
Chromium III	2.73861e-08			kilogram	air	biosphere
Copper ion	1.38684e-07			kilogram	air	biosphere
Dioxins, measured as 2,3,7,8-tetrachlorodibenzo-p-dioxin	6.35767e-14			kilogram	air	biosphere
Heat, waste	0.204696			megajoule	air	biosphere
Iron ion	4.115e-05			kilogram	air	biosphere
Lead II	4.08167e-07			kilogram	air	biosphere
Manganese II	6.84105e-07			kilogram	air	biosphere
Nitrogen oxides	2.12368e-05			kilogram	air	biosphere
PAH, polycyclic aromatic hydrocarbons	1e-08			kilogram	air	biosphere
Particulate Matter, < 2.5 um	4.47437e-05			kilogram	air	biosphere
Water	0.00611841			cubic meter	air	biosphere
Water	5.00963e-06			cubic meter	air::non-urban air or from high stacks	biosphere
Water, cooling, unspecified natural origin	0.00577581			cubic meter	natural resource::in water	biosphere
Water, unspecified natural origin	2.50482e-05			cubic meter	natural resource::in water	biosphere
steel production, converter, low-alloyed, 2025	1	steel_prod_SSP2-NPi	World	kilogram		production	1	steel, low-alloyed
blast furnace gas, Recycled Content cut-off	-0.0304027	remind - SSP2-NPi - 2025	GLO	megajoule		technosphere	-0.0304027	blast furnace gas
market for aluminium, wrought alloy	8.78501e-05	remind - SSP2-NPi - 2025	GLO	kilogram		technosphere	8.78501e-05	aluminium, wrought alloy
market for argon, liquid	0.000116964	remind - SSP2-NPi - 2025	RoW	kilogram		technosphere	0.000116964	argon, liquid
market for basic oxygen furnace dust	-0.019396	remind - SSP2-NPi - 2025	RoW	kilogram		technosphere	-0.019396	basic oxygen furnace dust
market for basic oxygen furnace secondary metallurgy slag	-0.0003008	remind - SSP2-NPi - 2025	RoW	kilogram		technosphere	-0.0003008	basic oxygen furnace secondary metallurgy slag
market for basic oxygen furnace slag	-0.104898	remind - SSP2-NPi - 2025	RoW	kilogram		technosphere	-0.104898	basic oxygen furnace slag
market for basic oxygen furnace sludge	-0.0003008	remind - SSP2-NPi - 2025	RoW	kilogram		technosphere	-0.0003008	basic oxygen furnace sludge
market for basic oxygen furnace waste	-0.00335064	remind - SSP2-NPi - 2025	GLO	kilogram		technosphere	-0.00335064	basic oxygen furnace waste
market for blast oxygen furnace converter	1.3333e-11	remind - SSP2-NPi - 2025	GLO	unit		technosphere	1.3333e-11	blast oxygen furnace converter
market for calcium carbide, technical grade	0.000190693	remind - SSP2-NPi - 2025	RoW	kilogram		technosphere	0.000190693	calcium carbide, technical grade
market for coke	0.000183216	remind - SSP2-NPi - 2025	GLO	megajoule		technosphere	0.000183216	coke
market for compressed air, 600 kPa gauge	0.0144222	remind - SSP2-NPi - 2025	RoW	cubic meter		technosphere	0.0144222	compressed air, 600 kPa gauge
market for copper, cathode	7.98637e-07	remind - SSP2-NPi - 2025	GLO	kilogram		technosphere	7.98637e-07	copper, cathode
market for diesel	2.90413e-06	remind - SSP2-NPi - 2025	RoW	kilogram		technosphere	2.90413e-06	diesel
market for dolomite	0.00442218	remind - SSP2-NPi - 2025	RoW	kilogram		technosphere	0.00442218	dolomite
market for electricity, medium voltage	0.000576605	remind - SSP2-NPi - 2025	VN	kilowatt hour		technosphere	0.000576605	electricity, medium voltage
market for electricity, medium voltage	1.27593e-05	remind - SSP2-NPi - 2025	CY	kilowatt hour		technosphere	1.27593e-05	electricity, medium voltage
market for electricity, medium voltage	0.000163672	remind - SSP2-NPi - 2025	UZ	kilowatt hour		technosphere	0.000163672	electricity, medium voltage
market for electricity, medium voltage	4.56929e-05	remind - SSP2-NPi - 2025	TJ	kilowatt hour		technosphere	4.56929e-05	electricity, medium voltage
market for electricity, medium voltage	0.000473443	remind - SSP2-NPi - 2025	ID	kilowatt hour		technosphere	0.000473443	electricity, medium voltage
market for electricity, medium voltage	3.82103e-05	remind - SSP2-NPi - 2025	KG	kilowatt hour		technosphere	3.82103e-05	electricity, medium voltage
market for electricity, medium voltage	0.000297532	remind - SSP2-NPi - 2025	TH	kilowatt hour		technosphere	0.000297532	electricity, medium voltage
market for electricity, medium voltage	0.000261098	remind - SSP2-NPi - 2025	PH	kilowatt hour		technosphere	0.000261098	electricity, medium voltage
market for electricity, medium voltage	4.8956e-06	remind - SSP2-NPi - 2025	QA	kilowatt hour		technosphere	4.8956e-06	electricity, medium voltage
market for electricity, medium voltage	3.00521e-05	remind - SSP2-NPi - 2025	KH	kilowatt hour		technosphere	3.00521e-05	electricity, medium voltage
market for electricity, medium voltage	0.000122021	remind - SSP2-NPi - 2025	SG	kilowatt hour		technosphere	0.000122021	electricity, medium voltage
market for electricity, medium voltage	0.00141139	remind - SSP2-NPi - 2025	KR	kilowatt hour		technosphere	0.00141139	electricity, medium voltage
market for electricity, medium voltage	0.000596764	remind - SSP2-NPi - 2025	TW	kilowatt hour		technosphere	0.000596764	electricity, medium voltage
market for electricity, medium voltage	0.000113291	remind - SSP2-NPi - 2025	NZ	kilowatt hour		technosphere	0.000113291	electricity, medium voltage
market for electricity, medium voltage	3.03323e-05	remind - SSP2-NPi - 2025	GE	kilowatt hour		technosphere	3.03323e-05	electricity, medium voltage
market for electricity, medium voltage	3.67822e-05	remind - SSP2-NPi - 2025	LB	kilowatt hour		technosphere	3.67822e-05	electricity, medium voltage
market for electricity, medium voltage	0.000154597	remind - SSP2-NPi - 2025	IL	kilowatt hour		technosphere	0.000154597	electricity, medium voltage
market for electricity, medium voltage	4.60361e-05	remind - SSP2-NPi - 2025	TM	kilowatt hour		technosphere	4.60361e-05	electricity, medium voltage
market for electricity, medium voltage	5.75519e-05	remind - SSP2-NPi - 2025	MM	kilowatt hour		technosphere	5.75519e-05	electricity, medium voltage
market for electricity, medium voltage	6.44113e-06	remind - SSP2-NPi - 2025	YE	kilowatt hour		technosphere	6.44113e-06	electricity, medium voltage
market for electricity, medium voltage	0.000329828	remind - SSP2-NPi - 2025	PK	kilowatt hour		technosphere	0.000329828	electricity, medium voltage
market for electricity, medium voltage	1.69109e-05	remind - SSP2-NPi - 2025	AM	kilowatt hour		technosphere	1.69109e-05	electricity, medium voltage
market for electricity, medium voltage	5.63004e-05	remind - SSP2-NPi - 2025	AZ	kilowatt hour		technosphere	5.63004e-05	electricity, medium voltage
market for electricity, medium voltage	0.00069025	remind - SSP2-NPi - 2025	TR	kilowatt hour		technosphere	0.00069025	electricity, medium voltage
market for electricity, medium voltage	0.000184784	remind - SSP2-NPi - 2025	BD	kilowatt hour		technosphere	0.000184784	electricity, medium voltage
market for electricity, medium voltage	3.88544e-05	remind - SSP2-NPi - 2025	SY	kilowatt hour		technosphere	3.88544e-05	electricity, medium voltage
market for electricity, medium voltage	4.76386e-05	remind - SSP2-NPi - 2025	BH	kilowatt hour		technosphere	4.76386e-05	electricity, medium voltage
market for electricity, medium voltage	3.85723e-05	remind - SSP2-NPi - 2025	LK	kilowatt hour		technosphere	3.85723e-05	electricity, medium voltage
market for electricity, medium voltage	4.33284e-05	remind - SSP2-NPi - 2025	JO	kilowatt hour		technosphere	4.33284e-05	electricity, medium voltage
market for electricity, medium voltage	0.00225931	remind - SSP2-NPi - 2025	JP	kilowatt hour		technosphere	0.00225931	electricity, medium voltage
market for electricity, medium voltage	3.42881e-05	remind - SSP2-NPi - 2025	KP	kilowatt hour		technosphere	3.42881e-05	electricity, medium voltage
market for electricity, medium voltage	9.95727e-06	remind - SSP2-NPi - 2025	BN	kilowatt hour		technosphere	9.95727e-06	electricity, medium voltage
market for electricity, medium voltage	2.14721e-05	remind - SSP2-NPi - 2025	MN	kilowatt hour		technosphere	2.14721e-05	electricity, medium voltage
market for electricity, medium voltage	9.51554e-05	remind - SSP2-NPi - 2025	OM	kilowatt hour		technosphere	9.51554e-05	electricity, medium voltage
market for electricity, medium voltage	0.000262526	remind - SSP2-NPi - 2025	KZ	kilowatt hour		technosphere	0.000262526	electricity, medium voltage
market for electricity, medium voltage	0.000128484	remind - SSP2-NPi - 2025	HK	kilowatt hour		technosphere	0.000128484	electricity, medium voltage
market for electricity, medium voltage	1.96652e-05	remind - SSP2-NPi - 2025	NP	kilowatt hour		technosphere	1.96652e-05	electricity, medium voltage
market for electricity, medium voltage	0.000578056	remind - SSP2-NPi - 2025	AU	kilowatt hour		technosphere	0.000578056	electricity, medium voltage
market for electricity, medium voltage	0.000423819	remind - SSP2-NPi - 2025	MY	kilowatt hour		technosphere	0.000423819	electricity, medium voltage
market for electrode, negative, Ni	5.19114e-06	remind - SSP2-NPi - 2025	GLO	kilogram		technosphere	5.19114e-06	electrode, negative, Ni
market for ferromanganese, high-coal, 74.5% Mn	0.015278	remind - SSP2-NPi - 2025	GLO	kilogram		technosphere	0.015278	ferromanganese, high-coal, 74.5% Mn
market for ferronickel	0.045	remind - SSP2-NPi - 2025	GLO	kilogram		technosphere	0.045	ferronickel
market for ferrosilicon	7.61609e-06	remind - SSP2-NPi - 2025	GLO	kilogram		technosphere	7.61609e-06	ferrosilicon
market for inert waste, for final disposal	-0.000565685	remind - SSP2-NPi - 2025	RoW	kilogram		technosphere	-0.000565685	inert waste, for final disposal
market for iron ore concentrate	0.000622896	remind - SSP2-NPi - 2025	GLO	kilogram		technosphere	0.000622896	iron ore concentrate
market for iron scrap, sorted, pressed	0.198865	remind - SSP2-NPi - 2025	RoW	kilogram		technosphere	0.198865	iron scrap, sorted, pressed
market for lime	0.00230153	remind - SSP2-NPi - 2025	RoW	kilogram		technosphere	0.00230153	lime
market for liquefied petroleum gas	1.06037e-05	remind - SSP2-NPi - 2025	RoW	kilogram		technosphere	1.06037e-05	liquefied petroleum gas
market for manganese	2.03289e-05	remind - SSP2-NPi - 2025	GLO	kilogram		technosphere	2.03289e-05	manganese
market for mill scale	-6.63e-05	remind - SSP2-NPi - 2025	RoW	kilogram		technosphere	-6.63e-05	mill scale
market for molybdenite	0.00059649	remind - SSP2-NPi - 2025	GLO	kilogram		technosphere	0.00059649	molybdenite
market for natural gas, high pressure	0.00120219	remind - SSP2-NPi - 2025	RoW	cubic meter		technosphere	0.00120219	natural gas, high pressure
market for nickel, class 1	5.83731e-07	remind - SSP2-NPi - 2025	GLO	kilogram		technosphere	5.83731e-07	nickel, class 1
market for nitrogen, liquid	0.00162595	remind - SSP2-NPi - 2025	RoW	kilogram		technosphere	0.00162595	nitrogen, liquid
market for oxygen, liquid	0.078054	remind - SSP2-NPi - 2025	World	kilogram		technosphere	0.078054	oxygen, liquid
market for pig iron	0.867945	remind - SSP2-NPi - 2025	World	kilogram		technosphere	0.867945	pig iron
market for propane	1.25241e-05	remind - SSP2-NPi - 2025	GLO	kilogram		technosphere	1.25241e-05	propane
market for quicklime, in pieces, loose	0.044833	remind - SSP2-NPi - 2025	RoW	kilogram		technosphere	0.044833	quicklime, in pieces, loose
market for sponge iron	0.000780486	remind - SSP2-NPi - 2025	GLO	kilogram		technosphere	0.000780486	sponge iron
market for steam, in chemical industry	0.000366647	remind - SSP2-NPi - 2025	RoW	kilogram		technosphere	0.000366647	steam, in chemical industry
market for wastewater from pig iron production	-0.00134164	remind - SSP2-NPi - 2025	RoW	cubic meter		technosphere	-0.00134164	wastewater from pig iron production
market for wastewater from pig iron production	-2.00385e-05	remind - SSP2-NPi - 2025	RoW	cubic meter		technosphere	-2.00385e-05	wastewater from pig iron production
market group for electricity, medium voltage	0.00215756	remind - SSP2-NPi - 2025	RME	kilowatt hour		technosphere	0.00215756	electricity, medium voltage
market group for electricity, medium voltage	0.00380426	remind - SSP2-NPi - 2025	RLA	kilowatt hour		technosphere	0.00380426	electricity, medium voltage
market group for electricity, medium voltage	0.0201787	remind - SSP2-NPi - 2025	CN	kilowatt hour		technosphere	0.0201787	electricity, medium voltage
market group for electricity, medium voltage	0.0121919	remind - SSP2-NPi - 2025	RNA	kilowatt hour		technosphere	0.0121919	electricity, medium voltage
market group for electricity, medium voltage	0.00190922	remind - SSP2-NPi - 2025	RAF	kilowatt hour		technosphere	0.00190922	electricity, medium voltage
Activity	steel production, electric, chromium steel 18/8, optimistic, 2025
code	63a6ef3a2a3c4efc914803bad3db9f11
comment	This dataset has been modified by `premise`, according to the performance for steel production indicated by the IAM model REMIND for the IAM region World in 2100, following the scenario SSP1-NDC. The energy efficiency of the process has been improved by 28%.Background: This activity represents the production of stainless steel (Type 304, aka. 18/8; assumed composition 68.6% Fe, 9.3% Ni, 19.0% Cr …
location	World
reference product	steel, chromium steel 18/8
scenario	SSP2-NPi
type	process
unit	kilogram
worksheet name	steel_prod_SSP2-NPi
year	2025
Exchanges
name	amount	database	location	unit	categories	type	default_amount	reference product
Benzene	3.63318e-07			kilogram	air	biosphere
Benzene, hexachloro-	1.54919e-09			kilogram	air	biosphere
Cadmium II	1.21655e-08			kilogram	air	biosphere
Carbon dioxide, fossil	0.033168			kilogram	air	biosphere
Carbon dioxide, non-fossil	9.475e-05			kilogram	air	biosphere
Carbon monoxide, fossil	0.000474342			kilogram	air	biosphere
Chromium III	1.83303e-07			kilogram	air	biosphere
Copper ion	7.48999e-08			kilogram	air	biosphere
Dioxins, measured as 2,3,7,8-tetrachlorodibenzo-p-dioxin	4.89898e-13			kilogram	air	biosphere
Hydrocarbons, aromatic	7.7008e-05			kilogram	air	biosphere
Hydrochloric acid	5.31037e-06			kilogram	air	biosphere
Hydrogen fluoride	2.44949e-08			kilogram	air	biosphere
Lead II	4.62331e-07			kilogram	air	biosphere
Mercury II	2e-08			kilogram	air	biosphere
Nickel II	7.74597e-08			kilogram	air	biosphere
Nitrogen oxides	7.73305e-05			kilogram	air	biosphere
PAH, polycyclic aromatic hydrocarbons	9.34345e-08			kilogram	air	biosphere
Particulate Matter, < 2.5 um	1.47224e-05			kilogram	air	biosphere
Particulate Matter, > 10 um	5.19615e-06			kilogram	air	biosphere
Particulate Matter, > 2.5 um and < 10um	1.47224e-05			kilogram	air	biosphere
Polychlorinated biphenyls	2.23607e-10			kilogram	air	biosphere
Sulfur dioxide	3.24037e-05			kilogram	air	biosphere
Water	0.0022952			cubic meter	water	biosphere
Water	0.00292117			cubic meter	air	biosphere
Water, cooling, unspecified natural origin	0.00654217			cubic meter	natural resource::in water	biosphere
Zinc II	2.19089e-06			kilogram	air	biosphere
steel production, electric, chromium steel 18/8, optimistic, 2025	1	steel_prod_SSP2-NPi	World	kilogram		production	1	steel, chromium steel 18/8
market for anode, for metal electrolysis	0.004	remind - SSP2-NPi - 2025	GLO	kilogram		technosphere	0.004	anode, for metal electrolysis
market for argon, liquid	0.032	remind - SSP2-NPi - 2025	RoW	kilogram		technosphere	0.032	argon, liquid
market for electric arc furnace converter	4e-11	remind - SSP2-NPi - 2025	GLO	unit		technosphere	4e-11	electric arc furnace converter
market for electric arc furnace dust	0	remind - SSP2-NPi - 2025	RoW	kilogram		technosphere	0	electric arc furnace dust
market for electric arc furnace secondary metallurgy slag	0	remind - SSP2-NPi - 2025	RoW	kilogram		technosphere	0	electric arc furnace secondary metallurgy slag
market for electric arc furnace slag	0	remind - SSP2-NPi - 2025	RoW	kilogram		technosphere	0	electric arc furnace slag
market for electricity, medium voltage	0.000998198	remind - SSP2-NPi - 2025	NZ	kilowatt hour		technosphere	0.000998198	electricity, medium voltage
market for electricity, medium voltage	0.00509321	remind - SSP2-NPi - 2025	AU	kilowatt hour		technosphere	0.00509321	electricity, medium voltage
market for ferrochromium, high-carbon, 68% Cr	0	remind - SSP2-NPi - 2025	GLO	kilogram		technosphere	0	ferrochromium, high-carbon, 68% Cr
market for ferronickel	0	remind - SSP2-NPi - 2025	GLO	kilogram		technosphere	0	ferronickel
market for hard coal	0.00691265	remind - SSP2-NPi - 2025	RoW	kilogram		technosphere	0.00691265	hard coal
market for hot rolling, steel	1	remind - SSP2-NPi - 2025	GLO	kilogram		technosphere	1	hot rolling, steel
market for inert waste, for final disposal	-0.00678233	remind - SSP2-NPi - 2025	RoW	kilogram		technosphere	-0.00678233	inert waste, for final disposal
market for iron scrap, sorted, pressed	0	remind - SSP2-NPi - 2025	RoW	kilogram		technosphere	0	iron scrap, sorted, pressed
market for natural gas, high pressure	0.00564357	remind - SSP2-NPi - 2025	RoW	cubic meter		technosphere	0.00564357	natural gas, high pressure
market for nitrogen, liquid	0.00359723	remind - SSP2-NPi - 2025	RoW	kilogram		technosphere	0.00359723	nitrogen, liquid
market for oxygen, liquid	0.036	remind - SSP2-NPi - 2025	World	kilogram		technosphere	0.036	oxygen, liquid
market for quicklime, in pieces, loose	0.0591608	remind - SSP2-NPi - 2025	RoW	kilogram		technosphere	0.0591608	quicklime, in pieces, loose
market for refractory, basic, packed	0.0154919	remind - SSP2-NPi - 2025	GLO	kilogram		technosphere	0.0154919	refractory, basic, packed
market group for electricity, medium voltage	0.0335191	remind - SSP2-NPi - 2025	RLA	kilowatt hour		technosphere	0.0335191	electricity, medium voltage
market group for electricity, medium voltage	0.107422	remind - SSP2-NPi - 2025	RNA	kilowatt hour		technosphere	0.107422	electricity, medium voltage
market group for electricity, medium voltage	0.016822	remind - SSP2-NPi - 2025	RAF	kilowatt hour		technosphere	0.016822	electricity, medium voltage
market group for electricity, medium voltage	0.30754	remind - SSP2-NPi - 2025	RAS	kilowatt hour		technosphere	0.30754	electricity, medium voltage
preperation for recycling, steel scrap, from fossil infrastructure, 2025	1.1355	steel_prod_SSP2-NPi	GLO	kilogram		technosphere	1.1355	steel scrap, from fossil infrastructure
treatment of electric arc furnace dust, residual material landfill, optimistic, 2025	-0.0191274	steel_prod_SSP2-NPi	RoW	kilogram		technosphere	-0.0191274	electric arc furnace dust
treatment of electric arc furnace slag, residual material landfill, optimistic, 2025	-0.165106	steel_prod_SSP2-NPi	GLO	kilogram		technosphere	-0.165106	electric arc furnace slag
Activity	steel production, electric, chromium steel 18/8, pessimistic, 2025
code	8ee1fadc8ab44abca69409f2d2e1930b
comment	This dataset has been modified by `premise`, according to the performance for steel production indicated by the IAM model REMIND for the IAM region World in 2100, following the scenario SSP1-NDC. The energy efficiency of the process has been improved by 28%.Background: This activity represents the production of stainless steel (Type 304, aka. 18/8; assumed composition 68.6% Fe, 9.3% Ni, 19.0% Cr …
location	World
reference product	steel, chromium steel 18/8
scenario	SSP2-NPi
type	process
unit	kilogram
worksheet name	steel_prod_SSP2-NPi
year	2025
Exchanges
name	amount	database	location	unit	categories	type	default_amount	reference product
Benzene	3.63318e-07			kilogram	air	biosphere
Benzene, hexachloro-	1.54919e-09			kilogram	air	biosphere
Cadmium II	1.21655e-08			kilogram	air	biosphere
Carbon dioxide, fossil	0.033168			kilogram	air	biosphere
Carbon dioxide, non-fossil	9.475e-05			kilogram	air	biosphere
Carbon monoxide, fossil	0.000474342			kilogram	air	biosphere
Chromium III	1.83303e-07			kilogram	air	biosphere
Copper ion	7.48999e-08			kilogram	air	biosphere
Dioxins, measured as 2,3,7,8-tetrachlorodibenzo-p-dioxin	4.89898e-13			kilogram	air	biosphere
Hydrocarbons, aromatic	7.7008e-05			kilogram	air	biosphere
Hydrochloric acid	5.31037e-06			kilogram	air	biosphere
Hydrogen fluoride	2.44949e-08			kilogram	air	biosphere
Lead II	4.62331e-07			kilogram	air	biosphere
Mercury II	2e-08			kilogram	air	biosphere
Nickel II	7.74597e-08			kilogram	air	biosphere
Nitrogen oxides	7.73305e-05			kilogram	air	biosphere
PAH, polycyclic aromatic hydrocarbons	9.34345e-08			kilogram	air	biosphere
Particulate Matter, < 2.5 um	1.47224e-05			kilogram	air	biosphere
Particulate Matter, > 10 um	5.19615e-06			kilogram	air	biosphere
Particulate Matter, > 2.5 um and < 10um	1.47224e-05			kilogram	air	biosphere
Polychlorinated biphenyls	2.23607e-10			kilogram	air	biosphere
Sulfur dioxide	3.24037e-05			kilogram	air	biosphere
Water	0.0022952			cubic meter	water	biosphere
Water	0.00292117			cubic meter	air	biosphere
Water, cooling, unspecified natural origin	0.00654217			cubic meter	natural resource::in water	biosphere
Zinc II	2.19089e-06			kilogram	air	biosphere
steel production, electric, chromium steel 18/8, pessimistic, 2025	1	steel_prod_SSP2-NPi	World	kilogram		production	1	steel, chromium steel 18/8
market for anode, for metal electrolysis	0.004	remind - SSP2-NPi - 2025	GLO	kilogram		technosphere	0.004	anode, for metal electrolysis
market for argon, liquid	0.032	remind - SSP2-NPi - 2025	RoW	kilogram		technosphere	0.032	argon, liquid
market for electric arc furnace converter	4e-11	remind - SSP2-NPi - 2025	GLO	unit		technosphere	4e-11	electric arc furnace converter
market for electricity, medium voltage	0.000998198	remind - SSP2-NPi - 2025	NZ	kilowatt hour		technosphere	0.000998198	electricity, medium voltage
market for electricity, medium voltage	0.00509321	remind - SSP2-NPi - 2025	AU	kilowatt hour		technosphere	0.00509321	electricity, medium voltage
market for ferrochromium, high-carbon, 68% Cr	0.26471	remind - SSP2-NPi - 2025	GLO	kilogram		technosphere	0.26471	ferrochromium, high-carbon, 68% Cr
market for ferronickel	0.32	remind - SSP2-NPi - 2025	GLO	kilogram		technosphere	0.32	ferronickel
market for hard coal	0.00691265	remind - SSP2-NPi - 2025	RoW	kilogram		technosphere	0.00691265	hard coal
market for hot rolling, steel	1	remind - SSP2-NPi - 2025	GLO	kilogram		technosphere	1	hot rolling, steel
market for inert waste, for final disposal	-0.00678233	remind - SSP2-NPi - 2025	RoW	kilogram		technosphere	-0.00678233	inert waste, for final disposal
market for natural gas, high pressure	0.00564357	remind - SSP2-NPi - 2025	RoW	cubic meter		technosphere	0.00564357	natural gas, high pressure
market for nitrogen, liquid	0.00359723	remind - SSP2-NPi - 2025	RoW	kilogram		technosphere	0.00359723	nitrogen, liquid
market for oxygen, liquid	0.036	remind - SSP2-NPi - 2025	World	kilogram		technosphere	0.036	oxygen, liquid
market for quicklime, in pieces, loose	0.0591608	remind - SSP2-NPi - 2025	RoW	kilogram		technosphere	0.0591608	quicklime, in pieces, loose
market for refractory, basic, packed	0.0154919	remind - SSP2-NPi - 2025	GLO	kilogram		technosphere	0.0154919	refractory, basic, packed
market group for electricity, medium voltage	0.0335191	remind - SSP2-NPi - 2025	RLA	kilowatt hour		technosphere	0.0335191	electricity, medium voltage
market group for electricity, medium voltage	0.107422	remind - SSP2-NPi - 2025	RNA	kilowatt hour		technosphere	0.107422	electricity, medium voltage
market group for electricity, medium voltage	0.016822	remind - SSP2-NPi - 2025	RAF	kilowatt hour		technosphere	0.016822	electricity, medium voltage
market group for electricity, medium voltage	0.30754	remind - SSP2-NPi - 2025	RAS	kilowatt hour		technosphere	0.30754	electricity, medium voltage
preperation for recycling, steel scrap, from fossil infrastructure, 2025	0.55079	steel_prod_SSP2-NPi	GLO	kilogram		technosphere	0.55079	steel scrap, from fossil infrastructure
treatment of electric arc furnace dust, residual material landfill, pessimistic, 2025	-0.0191274	steel_prod_SSP2-NPi	RoW	kilogram		technosphere	-0.0191274	electric arc furnace dust
treatment of electric arc furnace slag, residual material landfill, pessimistic, 2025	-0.165106	steel_prod_SSP2-NPi	GLO	kilogram		technosphere	-0.165106	electric arc furnace slag
Activity	steel production, electric, low-alloyed, optimistic, 2025
code	e8c5fac3388d4a08a96bb0f21e63f60c
comment	This dataset has been modified by `premise`, according to the performance for steel production indicated by the IAM model REMIND for the IAM region World in 2100, following the scenario SSP1-NDC. The energy efficiency of the process has been improved by 10%.This activity represents the production of secondary low-alloyed steel in an electric arc furnace (EAF). The process comprises the following …
location	World
reference product	steel, low-alloyed
scenario	SSP2-NPi
type	process
unit	kilogram
worksheet name	steel_prod_SSP2-NPi
year	2025
Exchanges
name	amount	database	location	unit	categories	type	default_amount	reference product
Antimony ion	4.20301e-10			kilogram	air	biosphere
Argon-40	1.55606e-05			kilogram	air	biosphere
Arsenic ion	4.75423e-10			kilogram	air	biosphere
Benzene	8.48637e-07			kilogram	air	biosphere
Benzene, hexachloro-	6.42293e-09			kilogram	air	biosphere
Cadmium II	1.91118e-08			kilogram	air	biosphere
Cadmium II	1.21518e-09			kilogram	air::urban air close to ground	biosphere
Cadmium II	1.62024e-11			kilogram	water	biosphere
Carbon dioxide, fossil	0.0448951			kilogram	air	biosphere
Carbon dioxide, fossil	0.00494661			kilogram	air::urban air close to ground	biosphere
Carbon dioxide, non-fossil	9.82157e-05			kilogram	air	biosphere
Carbon monoxide, fossil	0.000926546			kilogram	air	biosphere
Carbon monoxide, fossil	4.1135e-05			kilogram	air::urban air close to ground	biosphere
Chloride	7.17664e-05			kilogram	water	biosphere
Chromium III	2.97044e-09			kilogram	air::urban air close to ground	biosphere
Chromium III	4.7308e-07			kilogram	air	biosphere
Chromium VI	7.55436e-08			kilogram	water	biosphere
Chromium VI	2.48047e-10			kilogram	air	biosphere
Cobalt II	2.80201e-10			kilogram	air	biosphere
Copper ion	4.18562e-09			kilogram	air::urban air close to ground	biosphere
Copper ion	7.96923e-09			kilogram	water	biosphere
Copper ion	1.10953e-07			kilogram	air	biosphere
Dioxins, measured as 2,3,7,8-tetrachlorodibenzo-p-dioxin	1.56301e-12			kilogram	air	biosphere
Dioxins, measured as 2,3,7,8-tetrachlorodibenzo-p-dioxin	5.4008e-15			kilogram	air::urban air close to ground	biosphere
Hydrocarbons, aromatic	6.88555e-05			kilogram	air	biosphere
Hydrochloric acid	4.71748e-06			kilogram	air	biosphere
Hydrochloric acid	5.71134e-08			kilogram	air::urban air close to ground	biosphere
Hydrogen fluoride	6.6877e-07			kilogram	air	biosphere
Lead II	1.62024e-09			kilogram	water	biosphere
Lead II	7.97328e-07			kilogram	air	biosphere
Lead II	4.92823e-08			kilogram	air::urban air close to ground	biosphere
Manganese II	7.00502e-10			kilogram	air	biosphere
Mercury II	7.96618e-09			kilogram	air::urban air close to ground	biosphere
Mercury II	6.24269e-07			kilogram	air	biosphere
Mercury II	3.24048e-11			kilogram	water	biosphere
Methane, fossil	2.03852e-06			kilogram	air::urban air close to ground	biosphere
NMVOC, non-methane volatile organic compounds	2.03853e-06			kilogram	air::urban air close to ground	biosphere
Nickel II	2.43483e-07			kilogram	air	biosphere
Nickel II	2.7004e-10			kilogram	air::urban air close to ground	biosphere
Nickel II	3.30869e-10			kilogram	water	biosphere
Nitrogen oxides	7.31565e-06			kilogram	air::urban air close to ground	biosphere
Nitrogen oxides	0.000101937			kilogram	air	biosphere
PAH, polycyclic aromatic hydrocarbons	6.79146e-08			kilogram	air	biosphere
PAH, polycyclic aromatic hydrocarbons	1.14767e-08			kilogram	air::urban air close to ground	biosphere
Particulate Matter, < 2.5 um	5.62815e-05			kilogram	air	biosphere
Particulate Matter, < 2.5 um	7.12244e-07			kilogram	air::urban air close to ground	biosphere
Particulate Matter, > 10 um	2.5138e-07			kilogram	air::urban air close to ground	biosphere
Particulate Matter, > 10 um	1.9494e-05			kilogram	air	biosphere
Particulate Matter, > 2.5 um and < 10um	5.6355e-05			kilogram	air	biosphere
Particulate Matter, > 2.5 um and < 10um	7.12244e-07			kilogram	air::urban air close to ground	biosphere
Phosphorus	1.97059e-11			kilogram	water	biosphere
Polychlorinated biphenyls	6.49506e-09			kilogram	air	biosphere
Polychlorinated biphenyls	7.4261e-11			kilogram	air::urban air close to ground	biosphere
Selenium IV	2.80201e-10			kilogram	air	biosphere
Sulfate	5.12171e-08			kilogram	water	biosphere
Sulfur dioxide	1.90243e-07			kilogram	air::urban air close to ground	biosphere
Sulfur dioxide	5.20581e-05			kilogram	air	biosphere
Tellurium	5.62699e-10			kilogram	air	biosphere
Tin ion	7.00502e-10			kilogram	air	biosphere
Titanium ion	2.80201e-10			kilogram	air	biosphere
Vanadium V	7.00502e-10			kilogram	air	biosphere
Water	0.00147176			cubic meter	water	biosphere
Water	7.22231e-05			cubic meter	air::urban air close to ground	biosphere
Water	0.00887165			cubic meter	air	biosphere
Water, cooling, unspecified natural origin	0.00417675			cubic meter	natural resource::in water	biosphere
Water, unspecified natural origin	0.0352786			cubic meter	natural resource::in ground	biosphere
Zinc II	7.24922e-07			kilogram	air::urban air close to ground	biosphere
Zinc II	7.84638e-06			kilogram	air	biosphere
Zinc II	2.66075e-08			kilogram	water	biosphere
steel production, electric, low-alloyed, optimistic, 2025	1	steel_prod_SSP2-NPi	World	kilogram		production	1	steel, low-alloyed
electric arc furnace slag, for recovery, Recycled Content cut-off	-0.00399409	remind - SSP2-NPi - 2025	GLO	kilogram		technosphere	-0.00399409	electric arc furnace slag, for recovery
market for aluminium, cast alloy	0.000108691	remind - SSP2-NPi - 2025	GLO	kilogram		technosphere	0.000108691	aluminium, cast alloy
market for aluminium, primary, ingot	4.36378e-07	remind - SSP2-NPi - 2025	RoW	kilogram		technosphere	4.36378e-07	aluminium, primary, ingot
market for aluminium, wrought alloy	0.000108068	remind - SSP2-NPi - 2025	GLO	kilogram		technosphere	0.000108068	aluminium, wrought alloy
market for anode, for metal electrolysis	0.00234417	remind - SSP2-NPi - 2025	GLO	kilogram		technosphere	0.00234417	anode, for metal electrolysis
market for argon, liquid	0.000690895	remind - SSP2-NPi - 2025	RoW	kilogram		technosphere	0.000690895	argon, liquid
market for calcium carbide, technical grade	3.16949e-06	remind - SSP2-NPi - 2025	RoW	kilogram		technosphere	3.16949e-06	calcium carbide, technical grade
market for cast iron	0	remind - SSP2-NPi - 2025	GLO	kilogram		technosphere	0	cast iron
market for chemical, inorganic	1.82263e-06	remind - SSP2-NPi - 2025	GLO	kilogram		technosphere	1.82263e-06	chemical, inorganic
market for coke	0.00332933	remind - SSP2-NPi - 2025	GLO	megajoule		technosphere	0.00299928	coke
market for diesel, burned in building machine	1.62016e-05	remind - SSP2-NPi - 2025	World	megajoule		technosphere	1.45954e-05	diesel, burned in building machine
market for dolomite	0.0120311	remind - SSP2-NPi - 2025	RoW	kilogram		technosphere	0.0120311	dolomite
market for electric arc furnace converter	4.02495e-11	remind - SSP2-NPi - 2025	GLO	unit		technosphere	4.02495e-11	electric arc furnace converter
market for electric arc furnace dust	0	remind - SSP2-NPi - 2025	RoW	kilogram		technosphere	0	electric arc furnace dust
market for electric arc furnace secondary metallurgy slag	0	remind - SSP2-NPi - 2025	RoW	kilogram		technosphere	0	electric arc furnace secondary metallurgy slag
market for electric arc furnace slag	0	remind - SSP2-NPi - 2025	RoW	kilogram		technosphere	0	electric arc furnace slag
market for electricity, high voltage	7.34725e-06	remind - SSP2-NPi - 2025	KP	kilowatt hour		technosphere	6.61888e-06	electricity, high voltage
market for electricity, high voltage	0.000471592	remind - SSP2-NPi - 2025	JP	kilowatt hour		technosphere	0.000424841	electricity, high voltage
market for electricity, high voltage	2.02352e-05	remind - SSP2-NPi - 2025	OM	kilowatt hour		technosphere	1.82291e-05	electricity, high voltage
market for electricity, high voltage	0.000122632	remind - SSP2-NPi - 2025	AU	kilowatt hour		technosphere	0.000110475	electricity, high voltage
market for electricity, high voltage	5.58122e-05	remind - SSP2-NPi - 2025	KZ	kilowatt hour		technosphere	5.02792e-05	electricity, high voltage
market for electricity, high voltage	2.40065e-05	remind - SSP2-NPi - 2025	NZ	kilowatt hour		technosphere	2.16266e-05	electricity, high voltage
market for electricity, high voltage	2.71236e-05	remind - SSP2-NPi - 2025	HK	kilowatt hour		technosphere	2.44347e-05	electricity, high voltage
market for electricity, high voltage	8.19579e-06	remind - SSP2-NPi - 2025	KG	kilowatt hour		technosphere	7.3833e-06	electricity, high voltage
market for electricity, high voltage	1.00383e-05	remind - SSP2-NPi - 2025	BH	kilowatt hour		technosphere	9.04311e-06	electricity, high voltage
market for electricity, high voltage	2.69959e-06	remind - SSP2-NPi - 2025	CY	kilowatt hour		technosphere	2.43196e-06	electricity, high voltage
market for electricity, high voltage	8.9857e-05	remind - SSP2-NPi - 2025	MY	kilowatt hour		technosphere	8.0949e-05	electricity, high voltage
market for electricity, high voltage	4.20953e-06	remind - SSP2-NPi - 2025	NP	kilowatt hour		technosphere	3.79222e-06	electricity, high voltage
market for electricity, high voltage	0.000100529	remind - SSP2-NPi - 2025	ID	kilowatt hour		technosphere	9.05628e-05	electricity, high voltage
market for electricity, high voltage	1.1965e-05	remind - SSP2-NPi - 2025	AZ	kilowatt hour		technosphere	1.07788e-05	electricity, high voltage
market for electricity, high voltage	2.11845e-06	remind - SSP2-NPi - 2025	BN	kilowatt hour		technosphere	1.90844e-06	electricity, high voltage
market for electricity, high voltage	0.000122282	remind - SSP2-NPi - 2025	VN	kilowatt hour		technosphere	0.000110159	electricity, high voltage
market for electricity, high voltage	6.3224e-05	remind - SSP2-NPi - 2025	TH	kilowatt hour		technosphere	5.69563e-05	electricity, high voltage
market for electricity, high voltage	5.55282e-05	remind - SSP2-NPi - 2025	PH	kilowatt hour		technosphere	5.00234e-05	electricity, high voltage
market for electricity, high voltage	1.036e-06	remind - SSP2-NPi - 2025	QA	kilowatt hour		technosphere	9.33293e-07	electricity, high voltage
market for electricity, high voltage	6.3958e-06	remind - SSP2-NPi - 2025	KH	kilowatt hour		technosphere	5.76175e-06	electricity, high voltage
market for electricity, high voltage	9.76436e-06	remind - SSP2-NPi - 2025	TJ	kilowatt hour		technosphere	8.79637e-06	electricity, high voltage
market for electricity, high voltage	7.04425e-05	remind - SSP2-NPi - 2025	PK	kilowatt hour		technosphere	6.34591e-05	electricity, high voltage
market for electricity, high voltage	3.27437e-05	remind - SSP2-NPi - 2025	IL	kilowatt hour		technosphere	2.94977e-05	electricity, high voltage
market for electricity, high voltage	9.85571e-06	remind - SSP2-NPi - 2025	TM	kilowatt hour		technosphere	8.87866e-06	electricity, high voltage
market for electricity, high voltage	1.23145e-05	remind - SSP2-NPi - 2025	MM	kilowatt hour		technosphere	1.10937e-05	electricity, high voltage
market for electricity, high voltage	2.50564e-05	remind - SSP2-NPi - 2025	SG	kilowatt hour		technosphere	2.25724e-05	electricity, high voltage
market for electricity, high voltage	0.000298233	remind - SSP2-NPi - 2025	KR	kilowatt hour		technosphere	0.000268667	electricity, high voltage
market for electricity, high voltage	0.000126018	remind - SSP2-NPi - 2025	TW	kilowatt hour		technosphere	0.000113525	electricity, high voltage
market for electricity, high voltage	6.43726e-06	remind - SSP2-NPi - 2025	GE	kilowatt hour		technosphere	5.7991e-06	electricity, high voltage
market for electricity, high voltage	7.82947e-06	remind - SSP2-NPi - 2025	LB	kilowatt hour		technosphere	7.0533e-06	electricity, high voltage
market for electricity, high voltage	3.93291e-05	remind - SSP2-NPi - 2025	BD	kilowatt hour		technosphere	3.54302e-05	electricity, high voltage
market for electricity, high voltage	1.40788e-06	remind - SSP2-NPi - 2025	YE	kilowatt hour		technosphere	1.26831e-06	electricity, high voltage
market for electricity, high voltage	8.19102e-06	remind - SSP2-NPi - 2025	LK	kilowatt hour		technosphere	7.379e-06	electricity, high voltage
market for electricity, high voltage	8.38672e-06	remind - SSP2-NPi - 2025	SY	kilowatt hour		technosphere	7.5553e-06	electricity, high voltage
market for electricity, high voltage	3.59154e-06	remind - SSP2-NPi - 2025	AM	kilowatt hour		technosphere	3.23549e-06	electricity, high voltage
market for electricity, high voltage	3.47041e-05	remind - SSP2-NPi - 2025	UZ	kilowatt hour		technosphere	3.12637e-05	electricity, high voltage
market for electricity, high voltage	9.29135e-06	remind - SSP2-NPi - 2025	JO	kilowatt hour		technosphere	8.37025e-06	electricity, high voltage
market for electricity, high voltage	0.000147174	remind - SSP2-NPi - 2025	TR	kilowatt hour		technosphere	0.000132584	electricity, high voltage
market for electricity, high voltage	4.57147e-06	remind - SSP2-NPi - 2025	MN	kilowatt hour		technosphere	4.11828e-06	electricity, high voltage
market for electricity, low voltage	1.54936e-07	remind - SSP2-NPi - 2025	JO	kilowatt hour		technosphere	1.39576e-07	electricity, low voltage
market for electricity, low voltage	3.15726e-08	remind - SSP2-NPi - 2025	BN	kilowatt hour		technosphere	2.84426e-08	electricity, low voltage
market for electricity, low voltage	8.44093e-07	remind - SSP2-NPi - 2025	KZ	kilowatt hour		technosphere	7.60414e-07	electricity, low voltage
market for electricity, low voltage	1.90869e-06	remind - SSP2-NPi - 2025	VN	kilowatt hour		technosphere	1.71947e-06	electricity, low voltage
market for electricity, low voltage	1.59172e-08	remind - SSP2-NPi - 2025	QA	kilowatt hour		technosphere	1.43392e-08	electricity, low voltage
market for electricity, low voltage	8.02443e-06	remind - SSP2-NPi - 2025	JP	kilowatt hour		technosphere	7.22893e-06	electricity, low voltage
market for electricity, low voltage	5.36768e-07	remind - SSP2-NPi - 2025	IL	kilowatt hour		technosphere	4.83556e-07	electricity, low voltage
market for electricity, low voltage	4.22588e-07	remind - SSP2-NPi - 2025	HK	kilowatt hour		technosphere	3.80695e-07	electricity, low voltage
market for electricity, low voltage	1.37609e-06	remind - SSP2-NPi - 2025	MY	kilowatt hour		technosphere	1.23967e-06	electricity, low voltage
market for electricity, low voltage	1.51604e-06	remind - SSP2-NPi - 2025	ID	kilowatt hour		technosphere	1.36575e-06	electricity, low voltage
market for electricity, low voltage	1.41457e-07	remind - SSP2-NPi - 2025	TM	kilowatt hour		technosphere	1.27433e-07	electricity, low voltage
market for electricity, low voltage	2.02039e-06	remind - SSP2-NPi - 2025	AU	kilowatt hour		technosphere	1.8201e-06	electricity, low voltage
market for electricity, low voltage	4.39189e-08	remind - SSP2-NPi - 2025	CY	kilowatt hour		technosphere	3.9565e-08	electricity, low voltage
market for electricity, low voltage	9.61134e-08	remind - SSP2-NPi - 2025	KH	kilowatt hour		technosphere	8.65851e-08	electricity, low voltage
market for electricity, low voltage	1.41695e-07	remind - SSP2-NPi - 2025	TJ	kilowatt hour		technosphere	1.27648e-07	electricity, low voltage
market for electricity, low voltage	1.1629e-07	remind - SSP2-NPi - 2025	KG	kilowatt hour		technosphere	1.04761e-07	electricity, low voltage
market for electricity, low voltage	1.24482e-07	remind - SSP2-NPi - 2025	LK	kilowatt hour		technosphere	1.12142e-07	electricity, low voltage
market for electricity, low voltage	8.41681e-07	remind - SSP2-NPi - 2025	PH	kilowatt hour		technosphere	7.5824e-07	electricity, low voltage
market for electricity, low voltage	5.27228e-07	remind - SSP2-NPi - 2025	UZ	kilowatt hour		technosphere	4.74961e-07	electricity, low voltage
market for electricity, low voltage	1.05056e-07	remind - SSP2-NPi - 2025	KP	kilowatt hour		technosphere	9.46409e-08	electricity, low voltage
market for electricity, low voltage	1.79862e-07	remind - SSP2-NPi - 2025	AZ	kilowatt hour		technosphere	1.62031e-07	electricity, low voltage
market for electricity, low voltage	2.00037e-06	remind - SSP2-NPi - 2025	TW	kilowatt hour		technosphere	1.80206e-06	electricity, low voltage
market for electricity, low voltage	3.67417e-07	remind - SSP2-NPi - 2025	NZ	kilowatt hour		technosphere	3.30993e-07	electricity, low voltage
market for electricity, low voltage	1.005e-06	remind - SSP2-NPi - 2025	TH	kilowatt hour		technosphere	9.05372e-07	electricity, low voltage
market for electricity, low voltage	4.10046e-07	remind - SSP2-NPi - 2025	SG	kilowatt hour		technosphere	3.69396e-07	electricity, low voltage
market for electricity, low voltage	1.77765e-07	remind - SSP2-NPi - 2025	MM	kilowatt hour		technosphere	1.60142e-07	electricity, low voltage
market for electricity, low voltage	2.30185e-08	remind - SSP2-NPi - 2025	YE	kilowatt hour		technosphere	2.07366e-08	electricity, low voltage
market for electricity, low voltage	5.47171e-08	remind - SSP2-NPi - 2025	AM	kilowatt hour		technosphere	4.92927e-08	electricity, low voltage
market for electricity, low voltage	9.72895e-08	remind - SSP2-NPi - 2025	GE	kilowatt hour		technosphere	8.76447e-08	electricity, low voltage
market for electricity, low voltage	1.17261e-07	remind - SSP2-NPi - 2025	LB	kilowatt hour		technosphere	1.05637e-07	electricity, low voltage
market for electricity, low voltage	5.88548e-07	remind - SSP2-NPi - 2025	BD	kilowatt hour		technosphere	5.30202e-07	electricity, low voltage
market for electricity, low voltage	4.76373e-06	remind - SSP2-NPi - 2025	KR	kilowatt hour		technosphere	4.29148e-06	electricity, low voltage
market for electricity, low voltage	1.03288e-06	remind - SSP2-NPi - 2025	PK	kilowatt hour		technosphere	9.30483e-07	electricity, low voltage
market for electricity, low voltage	1.14434e-07	remind - SSP2-NPi - 2025	SY	kilowatt hour		technosphere	1.03089e-07	electricity, low voltage
market for electricity, low voltage	2.26588e-06	remind - SSP2-NPi - 2025	TR	kilowatt hour		technosphere	2.04125e-06	electricity, low voltage
market for electricity, low voltage	1.57994e-07	remind - SSP2-NPi - 2025	BH	kilowatt hour		technosphere	1.42331e-07	electricity, low voltage
market for electricity, low voltage	6.87043e-08	remind - SSP2-NPi - 2025	MN	kilowatt hour		technosphere	6.18933e-08	electricity, low voltage
market for electricity, low voltage	3.02294e-07	remind - SSP2-NPi - 2025	OM	kilowatt hour		technosphere	2.72326e-07	electricity, low voltage
market for electricity, low voltage	6.04712e-08	remind - SSP2-NPi - 2025	NP	kilowatt hour		technosphere	5.44763e-08	electricity, low voltage
market for electricity, medium voltage	0.00561731	remind - SSP2-NPi - 2025	VN	kilowatt hour		technosphere	0.00506043	electricity, medium voltage
market for electricity, medium voltage	0.000124302	remind - SSP2-NPi - 2025	CY	kilowatt hour		technosphere	0.000111979	electricity, medium voltage
market for electricity, medium voltage	0.0015945	remind - SSP2-NPi - 2025	UZ	kilowatt hour		technosphere	0.00143643	electricity, medium voltage
market for electricity, medium voltage	0.000445141	remind - SSP2-NPi - 2025	TJ	kilowatt hour		technosphere	0.000401012	electricity, medium voltage
market for electricity, medium voltage	0.0046123	remind - SSP2-NPi - 2025	ID	kilowatt hour		technosphere	0.00415506	electricity, medium voltage
market for electricity, medium voltage	0.000372246	remind - SSP2-NPi - 2025	KG	kilowatt hour		technosphere	0.000335343	electricity, medium voltage
market for electricity, medium voltage	0.00289857	remind - SSP2-NPi - 2025	TH	kilowatt hour		technosphere	0.00261121	electricity, medium voltage
market for electricity, medium voltage	0.00254362	remind - SSP2-NPi - 2025	PH	kilowatt hour		technosphere	0.00229146	electricity, medium voltage
market for electricity, medium voltage	4.76931e-05	remind - SSP2-NPi - 2025	QA	kilowatt hour		technosphere	4.2965e-05	electricity, medium voltage
market for electricity, medium voltage	0.000292769	remind - SSP2-NPi - 2025	KH	kilowatt hour		technosphere	0.000263745	electricity, medium voltage
market for electricity, medium voltage	0.00118873	remind - SSP2-NPi - 2025	SG	kilowatt hour		technosphere	0.00107089	electricity, medium voltage
market for electricity, medium voltage	0.0137499	remind - SSP2-NPi - 2025	KR	kilowatt hour		technosphere	0.0123868	electricity, medium voltage
market for electricity, medium voltage	0.00581369	remind - SSP2-NPi - 2025	TW	kilowatt hour		technosphere	0.00523735	electricity, medium voltage
market for electricity, medium voltage	0.00110368	remind - SSP2-NPi - 2025	NZ	kilowatt hour		technosphere	0.000994268	electricity, medium voltage
market for electricity, medium voltage	0.000295498	remind - SSP2-NPi - 2025	GE	kilowatt hour		technosphere	0.000266204	electricity, medium voltage
market for electricity, medium voltage	0.000358333	remind - SSP2-NPi - 2025	LB	kilowatt hour		technosphere	0.00032281	electricity, medium voltage
market for electricity, medium voltage	0.00150609	remind - SSP2-NPi - 2025	IL	kilowatt hour		technosphere	0.00135678	electricity, medium voltage
market for electricity, medium voltage	0.000448485	remind - SSP2-NPi - 2025	TM	kilowatt hour		technosphere	0.000404024	electricity, medium voltage
market for electricity, medium voltage	0.000560672	remind - SSP2-NPi - 2025	MM	kilowatt hour		technosphere	0.00050509	electricity, medium voltage
market for electricity, medium voltage	6.27497e-05	remind - SSP2-NPi - 2025	YE	kilowatt hour		technosphere	5.6529e-05	electricity, medium voltage
market for electricity, medium voltage	0.00321319	remind - SSP2-NPi - 2025	PK	kilowatt hour		technosphere	0.00289465	electricity, medium voltage
market for electricity, medium voltage	0.000164746	remind - SSP2-NPi - 2025	AM	kilowatt hour		technosphere	0.000148414	electricity, medium voltage
market for electricity, medium voltage	0.000548481	remind - SSP2-NPi - 2025	AZ	kilowatt hour		technosphere	0.000494107	electricity, medium voltage
market for electricity, medium voltage	0.00672444	remind - SSP2-NPi - 2025	TR	kilowatt hour		technosphere	0.00605781	electricity, medium voltage
market for electricity, medium voltage	0.00180017	remind - SSP2-NPi - 2025	BD	kilowatt hour		technosphere	0.00162171	electricity, medium voltage
market for electricity, medium voltage	0.000378521	remind - SSP2-NPi - 2025	SY	kilowatt hour		technosphere	0.000340996	electricity, medium voltage
market for electricity, medium voltage	0.000464096	remind - SSP2-NPi - 2025	BH	kilowatt hour		technosphere	0.000418088	electricity, medium voltage
market for electricity, medium voltage	0.000375773	remind - SSP2-NPi - 2025	LK	kilowatt hour		technosphere	0.000338521	electricity, medium voltage
market for electricity, medium voltage	0.000422106	remind - SSP2-NPi - 2025	JO	kilowatt hour		technosphere	0.000380261	electricity, medium voltage
market for electricity, medium voltage	0.0220102	remind - SSP2-NPi - 2025	JP	kilowatt hour		technosphere	0.0198282	electricity, medium voltage
market for electricity, medium voltage	0.000334035	remind - SSP2-NPi - 2025	KP	kilowatt hour		technosphere	0.000300921	electricity, medium voltage
market for electricity, medium voltage	9.7004e-05	remind - SSP2-NPi - 2025	BN	kilowatt hour		technosphere	8.73875e-05	electricity, medium voltage
market for electricity, medium voltage	0.000209182	remind - SSP2-NPi - 2025	MN	kilowatt hour		technosphere	0.000188444	electricity, medium voltage
market for electricity, medium voltage	0.000927007	remind - SSP2-NPi - 2025	OM	kilowatt hour		technosphere	0.000835108	electricity, medium voltage
market for electricity, medium voltage	0.00255754	remind - SSP2-NPi - 2025	KZ	kilowatt hour		technosphere	0.00230399	electricity, medium voltage
market for electricity, medium voltage	0.00125169	remind - SSP2-NPi - 2025	HK	kilowatt hour		technosphere	0.00112761	electricity, medium voltage
market for electricity, medium voltage	0.000191579	remind - SSP2-NPi - 2025	NP	kilowatt hour		technosphere	0.000172587	electricity, medium voltage
market for electricity, medium voltage	0.00563144	remind - SSP2-NPi - 2025	AU	kilowatt hour		technosphere	0.00507316	electricity, medium voltage
market for electricity, medium voltage	0.00412886	remind - SSP2-NPi - 2025	MY	kilowatt hour		technosphere	0.00371954	electricity, medium voltage
market for electrode, negative, Ni	0.000367128	remind - SSP2-NPi - 2025	GLO	kilogram		technosphere	0.000367128	electrode, negative, Ni
market for ethylene glycol	2.22266e-08	remind - SSP2-NPi - 2025	GLO	kilogram		technosphere	2.22266e-08	ethylene glycol
market for ferrochromium, high-carbon, 68% Cr	0	remind - SSP2-NPi - 2025	GLO	kilogram		technosphere	0	ferrochromium, high-carbon, 68% Cr
market for ferromanganese, high-coal, 74.5% Mn	0	remind - SSP2-NPi - 2025	GLO	kilogram		technosphere	0	ferromanganese, high-coal, 74.5% Mn
market for ferrosilicon	0	remind - SSP2-NPi - 2025	GLO	kilogram		technosphere	0	ferrosilicon
market for fluorspar, 97% purity	1.5411e-05	remind - SSP2-NPi - 2025	GLO	kilogram		technosphere	1.5411e-05	fluorspar, 97% purity
market for hard coal	0.00721441	remind - SSP2-NPi - 2025	RoW	kilogram		technosphere	0.00649921	hard coal
market for heat, district or industrial, natural gas	0.0114557	remind - SSP2-NPi - 2025	RoW	megajoule		technosphere	0.01032	heat, district or industrial, natural gas
market for heat, district or industrial, other than natural gas	0.00323011	remind - SSP2-NPi - 2025	RoW	megajoule		technosphere	0.0029099	heat, district or industrial, other than natural gas
market for heavy fuel oil	0.000125876	remind - SSP2-NPi - 2025	RoW	kilogram		technosphere	0.000113397	heavy fuel oil
market for hot rolling, steel	1	remind - SSP2-NPi - 2025	GLO	kilogram		technosphere	1	hot rolling, steel
market for hydrochloric acid, without water, in 30% solution state	1.23711e-05	remind - SSP2-NPi - 2025	RoW	kilogram		technosphere	1.23711e-05	hydrochloric acid, without water, in 30% solution state
market for inert waste	-0.000696008	remind - SSP2-NPi - 2025	RoW	kilogram		technosphere	-0.000696008	inert waste
market for inert waste, for final disposal	-0.00734125	remind - SSP2-NPi - 2025	RoW	kilogram		technosphere	-0.00734125	inert waste, for final disposal
market for iron scrap, sorted, pressed	0	remind - SSP2-NPi - 2025	RoW	kilogram		technosphere	0	iron scrap, sorted, pressed
market for iron scrap, unsorted	0	remind - SSP2-NPi - 2025	GLO	kilogram		technosphere	0	iron scrap, unsorted
market for lime	0.0132342	remind - SSP2-NPi - 2025	RoW	kilogram		technosphere	0.0132342	lime
market for liquefied petroleum gas	0.000214812	remind - SSP2-NPi - 2025	RoW	kilogram		technosphere	0.000193516	liquefied petroleum gas
market for lubricating oil	0.021116	remind - SSP2-NPi - 2025	RoW	kilogram		technosphere	0.0190226	lubricating oil
market for molybdenum trioxide	0	remind - SSP2-NPi - 2025	GLO	kilogram		technosphere	0	molybdenum trioxide
market for natural gas, high pressure	0.00649376	remind - SSP2-NPi - 2025	RoW	cubic meter		technosphere	0.00585	natural gas, high pressure
market for nickel, class 1	0	remind - SSP2-NPi - 2025	GLO	kilogram		technosphere	0	nickel, class 1
market for nitrogen, liquid	0.0120712	remind - SSP2-NPi - 2025	RoW	kilogram		technosphere	0.0120712	nitrogen, liquid
market for oxygen, liquid	0.0359034	remind - SSP2-NPi - 2025	World	kilogram		technosphere	0.0359034	oxygen, liquid
market for pig iron	0	remind - SSP2-NPi - 2025	World	kilogram		technosphere	0	pig iron
market for propane, burned in building machine	1.29106e-05	remind - SSP2-NPi - 2025	GLO	megajoule		technosphere	1.29106e-05	propane, burned in building machine
market for quicklime, in pieces, loose	0.0413549	remind - SSP2-NPi - 2025	RoW	kilogram		technosphere	0.0413549	quicklime, in pieces, loose
market for refractory, basic, packed	0.0145136	remind - SSP2-NPi - 2025	GLO	kilogram		technosphere	0.0145136	refractory, basic, packed
market for silica sand	2.11069e-05	remind - SSP2-NPi - 2025	GLO	kilogram		technosphere	2.11069e-05	silica sand
market for spent solvent mixture	-2.22266e-08	remind - SSP2-NPi - 2025	RoW	kilogram		technosphere	-2.22266e-08	spent solvent mixture
market for sponge iron	0	remind - SSP2-NPi - 2025	GLO	kilogram		technosphere	0	sponge iron
market for sulfur dioxide, liquid	8.61273e-06	remind - SSP2-NPi - 2025	RoW	kilogram		technosphere	8.61273e-06	sulfur dioxide, liquid
market for sulfuric acid	6.75775e-06	remind - SSP2-NPi - 2025	RoW	kilogram		technosphere	6.75775e-06	sulfuric acid
market for wastewater from pig iron production	-0.028223	remind - SSP2-NPi - 2025	RoW	cubic meter		technosphere	-0.028223	wastewater from pig iron production
market group for electricity, high voltage	0.000191016	remind - SSP2-NPi - 2025	Canada without Quebec	kilowatt hour		technosphere	0.000172079	electricity, high voltage
market group for electricity, high voltage	0.00040867	remind - SSP2-NPi - 2025	RAF	kilowatt hour		technosphere	0.000368156	electricity, high voltage
market group for electricity, high voltage	0.000815925	remind - SSP2-NPi - 2025	RLA	kilowatt hour		technosphere	0.000735038	electricity, high voltage
market group for electricity, high voltage	0.000460268	remind - SSP2-NPi - 2025	RME	kilowatt hour		technosphere	0.000414639	electricity, high voltage
market group for electricity, high voltage	0.00427049	remind - SSP2-NPi - 2025	CN	kilowatt hour		technosphere	0.00384713	electricity, high voltage
market group for electricity, high voltage	0.00227711	remind - SSP2-NPi - 2025	US	kilowatt hour		technosphere	0.00205136	electricity, high voltage
market group for electricity, low voltage	1.17905e-05	remind - SSP2-NPi - 2025	RLA	kilowatt hour		technosphere	1.06217e-05	electricity, low voltage
market group for electricity, low voltage	6.55855e-05	remind - SSP2-NPi - 2025	CN	kilowatt hour		technosphere	5.90837e-05	electricity, low voltage
market group for electricity, low voltage	6.83821e-06	remind - SSP2-NPi - 2025	RME	kilowatt hour		technosphere	6.1603e-06	electricity, low voltage
market group for electricity, low voltage	3.58941e-05	remind - SSP2-NPi - 2025	US	kilowatt hour		technosphere	3.23357e-05	electricity, low voltage
market group for electricity, low voltage	2.95392e-06	remind - SSP2-NPi - 2025	Canada without Quebec	kilowatt hour		technosphere	2.66109e-06	electricity, low voltage
market group for electricity, low voltage	5.94949e-06	remind - SSP2-NPi - 2025	RAF	kilowatt hour		technosphere	5.35969e-06	electricity, low voltage
market group for electricity, medium voltage	0.021019	remind - SSP2-NPi - 2025	RME	kilowatt hour		technosphere	0.0189353	electricity, medium voltage
market group for electricity, medium voltage	0.0370612	remind - SSP2-NPi - 2025	RLA	kilowatt hour		technosphere	0.0333871	electricity, medium voltage
market group for electricity, medium voltage	0.105089	remind - SSP2-NPi - 2025	US	kilowatt hour		technosphere	0.0946714	electricity, medium voltage
market group for electricity, medium voltage	0.196582	remind - SSP2-NPi - 2025	CN	kilowatt hour		technosphere	0.177094	electricity, medium voltage
market group for electricity, medium voltage	0.0185997	remind - SSP2-NPi - 2025	RAF	kilowatt hour		technosphere	0.0167558	electricity, medium voltage
market group for electricity, medium voltage	0.00879503	remind - SSP2-NPi - 2025	Canada without Quebec	kilowatt hour		technosphere	0.00792313	electricity, medium voltage
preperation for recycling, steel scrap, from fossil infrastructure, 2025	1.18008	steel_prod_SSP2-NPi	GLO	kilogram		technosphere	1.18008	steel scrap, from fossil infrastructure
treatment of electric arc furnace dust, residual material landfill, optimistic, 2025	-0.0280052	steel_prod_SSP2-NPi	RoW	kilogram		technosphere	-0.0280052	electric arc furnace dust
treatment of electric arc furnace slag, residual material landfill, optimistic, 2025	-0.105263	steel_prod_SSP2-NPi	GLO	kilogram		technosphere	-0.105263	electric arc furnace slag
Activity	steel production, electric, low-alloyed, pessimistic, 2025
code	e0b67cb5310f48e497e13e4b0e57e6d5
comment	This dataset has been modified by `premise`, according to the performance for steel production indicated by the IAM model REMIND for the IAM region World in 2100, following the scenario SSP1-NDC. The energy efficiency of the process has been improved by 10%.This activity represents the production of secondary low-alloyed steel in an electric arc furnace (EAF). The process comprises the following …
location	World
reference product	steel, low-alloyed
scenario	SSP2-NPi
type	process
unit	kilogram
worksheet name	steel_prod_SSP2-NPi
year	2025
Exchanges
name	amount	database	location	unit	categories	type	default_amount	reference product
Antimony ion	4.20301e-10			kilogram	air	biosphere
Argon-40	1.55606e-05			kilogram	air	biosphere
Arsenic ion	4.75423e-10			kilogram	air	biosphere
Benzene	8.48637e-07			kilogram	air	biosphere
Benzene, hexachloro-	6.42293e-09			kilogram	air	biosphere
Cadmium II	1.91118e-08			kilogram	air	biosphere
Cadmium II	1.21518e-09			kilogram	air::urban air close to ground	biosphere
Cadmium II	1.62024e-11			kilogram	water	biosphere
Carbon dioxide, fossil	0.0448951			kilogram	air	biosphere
Carbon dioxide, fossil	0.00494661			kilogram	air::urban air close to ground	biosphere
Carbon dioxide, non-fossil	9.82157e-05			kilogram	air	biosphere
Carbon monoxide, fossil	0.000926546			kilogram	air	biosphere
Carbon monoxide, fossil	4.1135e-05			kilogram	air::urban air close to ground	biosphere
Chloride	7.17664e-05			kilogram	water	biosphere
Chromium III	2.97044e-09			kilogram	air::urban air close to ground	biosphere
Chromium III	4.7308e-07			kilogram	air	biosphere
Chromium VI	7.55436e-08			kilogram	water	biosphere
Chromium VI	2.48047e-10			kilogram	air	biosphere
Cobalt II	2.80201e-10			kilogram	air	biosphere
Copper ion	4.18562e-09			kilogram	air::urban air close to ground	biosphere
Copper ion	7.96923e-09			kilogram	water	biosphere
Copper ion	1.10953e-07			kilogram	air	biosphere
Dioxins, measured as 2,3,7,8-tetrachlorodibenzo-p-dioxin	1.56301e-12			kilogram	air	biosphere
Dioxins, measured as 2,3,7,8-tetrachlorodibenzo-p-dioxin	5.4008e-15			kilogram	air::urban air close to ground	biosphere
Hydrocarbons, aromatic	6.88555e-05			kilogram	air	biosphere
Hydrochloric acid	4.71748e-06			kilogram	air	biosphere
Hydrochloric acid	5.71134e-08			kilogram	air::urban air close to ground	biosphere
Hydrogen fluoride	6.6877e-07			kilogram	air	biosphere
Lead II	1.62024e-09			kilogram	water	biosphere
Lead II	7.97328e-07			kilogram	air	biosphere
Lead II	4.92823e-08			kilogram	air::urban air close to ground	biosphere
Manganese II	7.00502e-10			kilogram	air	biosphere
Mercury II	7.96618e-09			kilogram	air::urban air close to ground	biosphere
Mercury II	6.24269e-07			kilogram	air	biosphere
Mercury II	3.24048e-11			kilogram	water	biosphere
Methane, fossil	2.03852e-06			kilogram	air::urban air close to ground	biosphere
NMVOC, non-methane volatile organic compounds	2.03853e-06			kilogram	air::urban air close to ground	biosphere
Nickel II	2.43483e-07			kilogram	air	biosphere
Nickel II	2.7004e-10			kilogram	air::urban air close to ground	biosphere
Nickel II	3.30869e-10			kilogram	water	biosphere
Nitrogen oxides	7.31565e-06			kilogram	air::urban air close to ground	biosphere
Nitrogen oxides	0.000101937			kilogram	air	biosphere
PAH, polycyclic aromatic hydrocarbons	6.79146e-08			kilogram	air	biosphere
PAH, polycyclic aromatic hydrocarbons	1.14767e-08			kilogram	air::urban air close to ground	biosphere
Particulate Matter, < 2.5 um	5.62815e-05			kilogram	air	biosphere
Particulate Matter, < 2.5 um	7.12244e-07			kilogram	air::urban air close to ground	biosphere
Particulate Matter, > 10 um	2.5138e-07			kilogram	air::urban air close to ground	biosphere
Particulate Matter, > 10 um	1.9494e-05			kilogram	air	biosphere
Particulate Matter, > 2.5 um and < 10um	5.6355e-05			kilogram	air	biosphere
Particulate Matter, > 2.5 um and < 10um	7.12244e-07			kilogram	air::urban air close to ground	biosphere
Phosphorus	1.97059e-11			kilogram	water	biosphere
Polychlorinated biphenyls	6.49506e-09			kilogram	air	biosphere
Polychlorinated biphenyls	7.4261e-11			kilogram	air::urban air close to ground	biosphere
Selenium IV	2.80201e-10			kilogram	air	biosphere
Sulfate	5.12171e-08			kilogram	water	biosphere
Sulfur dioxide	1.90243e-07			kilogram	air::urban air close to ground	biosphere
Sulfur dioxide	5.20581e-05			kilogram	air	biosphere
Tellurium	5.62699e-10			kilogram	air	biosphere
Tin ion	7.00502e-10			kilogram	air	biosphere
Titanium ion	2.80201e-10			kilogram	air	biosphere
Vanadium V	7.00502e-10			kilogram	air	biosphere
Water	0.00147176			cubic meter	water	biosphere
Water	7.22231e-05			cubic meter	air::urban air close to ground	biosphere
Water	0.00887165			cubic meter	air	biosphere
Water, cooling, unspecified natural origin	0.00417675			cubic meter	natural resource::in water	biosphere
Water, unspecified natural origin	0.0352786			cubic meter	natural resource::in ground	biosphere
Zinc II	7.24922e-07			kilogram	air::urban air close to ground	biosphere
Zinc II	7.84638e-06			kilogram	air	biosphere
Zinc II	2.66075e-08			kilogram	water	biosphere
steel production, electric, low-alloyed, pessimistic, 2025	1	steel_prod_SSP2-NPi	World	kilogram		production	1	steel, low-alloyed
electric arc furnace slag, for recovery, Recycled Content cut-off	-0.00399409	remind - SSP2-NPi - 2025	GLO	kilogram		technosphere	-0.00399409	electric arc furnace slag, for recovery
market for aluminium, cast alloy	0.000108691	remind - SSP2-NPi - 2025	GLO	kilogram		technosphere	0.000108691	aluminium, cast alloy
market for aluminium, primary, ingot	4.36378e-07	remind - SSP2-NPi - 2025	RoW	kilogram		technosphere	4.36378e-07	aluminium, primary, ingot
market for aluminium, wrought alloy	0.000108068	remind - SSP2-NPi - 2025	GLO	kilogram		technosphere	0.000108068	aluminium, wrought alloy
market for anode, for metal electrolysis	0.00234417	remind - SSP2-NPi - 2025	GLO	kilogram		technosphere	0.00234417	anode, for metal electrolysis
market for argon, liquid	0.000690895	remind - SSP2-NPi - 2025	RoW	kilogram		technosphere	0.000690895	argon, liquid
market for calcium carbide, technical grade	3.16949e-06	remind - SSP2-NPi - 2025	RoW	kilogram		technosphere	3.16949e-06	calcium carbide, technical grade
market for cast iron	3.44512e-05	remind - SSP2-NPi - 2025	GLO	kilogram		technosphere	3.44512e-05	cast iron
market for chemical, inorganic	1.82263e-06	remind - SSP2-NPi - 2025	GLO	kilogram		technosphere	1.82263e-06	chemical, inorganic
market for coke	0.00332933	remind - SSP2-NPi - 2025	GLO	megajoule		technosphere	0.00299928	coke
market for diesel, burned in building machine	1.62016e-05	remind - SSP2-NPi - 2025	World	megajoule		technosphere	1.45954e-05	diesel, burned in building machine
market for dolomite	0.0120311	remind - SSP2-NPi - 2025	RoW	kilogram		technosphere	0.0120311	dolomite
market for electric arc furnace converter	4.02495e-11	remind - SSP2-NPi - 2025	GLO	unit		technosphere	4.02495e-11	electric arc furnace converter
market for electric arc furnace dust	0	remind - SSP2-NPi - 2025	RoW	kilogram		technosphere	0	electric arc furnace dust
market for electric arc furnace secondary metallurgy slag	0	remind - SSP2-NPi - 2025	RoW	kilogram		technosphere	0	electric arc furnace secondary metallurgy slag
market for electric arc furnace slag	0	remind - SSP2-NPi - 2025	RoW	kilogram		technosphere	0	electric arc furnace slag
market for electricity, high voltage	7.34725e-06	remind - SSP2-NPi - 2025	KP	kilowatt hour		technosphere	6.61888e-06	electricity, high voltage
market for electricity, high voltage	0.000471592	remind - SSP2-NPi - 2025	JP	kilowatt hour		technosphere	0.000424841	electricity, high voltage
market for electricity, high voltage	2.02352e-05	remind - SSP2-NPi - 2025	OM	kilowatt hour		technosphere	1.82291e-05	electricity, high voltage
market for electricity, high voltage	0.000122632	remind - SSP2-NPi - 2025	AU	kilowatt hour		technosphere	0.000110475	electricity, high voltage
market for electricity, high voltage	5.58122e-05	remind - SSP2-NPi - 2025	KZ	kilowatt hour		technosphere	5.02792e-05	electricity, high voltage
market for electricity, high voltage	2.40065e-05	remind - SSP2-NPi - 2025	NZ	kilowatt hour		technosphere	2.16266e-05	electricity, high voltage
market for electricity, high voltage	2.71236e-05	remind - SSP2-NPi - 2025	HK	kilowatt hour		technosphere	2.44347e-05	electricity, high voltage
market for electricity, high voltage	8.19579e-06	remind - SSP2-NPi - 2025	KG	kilowatt hour		technosphere	7.3833e-06	electricity, high voltage
market for electricity, high voltage	1.00383e-05	remind - SSP2-NPi - 2025	BH	kilowatt hour		technosphere	9.04311e-06	electricity, high voltage
market for electricity, high voltage	2.69959e-06	remind - SSP2-NPi - 2025	CY	kilowatt hour		technosphere	2.43196e-06	electricity, high voltage
market for electricity, high voltage	8.9857e-05	remind - SSP2-NPi - 2025	MY	kilowatt hour		technosphere	8.0949e-05	electricity, high voltage
market for electricity, high voltage	4.20953e-06	remind - SSP2-NPi - 2025	NP	kilowatt hour		technosphere	3.79222e-06	electricity, high voltage
market for electricity, high voltage	0.000100529	remind - SSP2-NPi - 2025	ID	kilowatt hour		technosphere	9.05628e-05	electricity, high voltage
market for electricity, high voltage	1.1965e-05	remind - SSP2-NPi - 2025	AZ	kilowatt hour		technosphere	1.07788e-05	electricity, high voltage
market for electricity, high voltage	2.11845e-06	remind - SSP2-NPi - 2025	BN	kilowatt hour		technosphere	1.90844e-06	electricity, high voltage
market for electricity, high voltage	0.000122282	remind - SSP2-NPi - 2025	VN	kilowatt hour		technosphere	0.000110159	electricity, high voltage
market for electricity, high voltage	6.3224e-05	remind - SSP2-NPi - 2025	TH	kilowatt hour		technosphere	5.69563e-05	electricity, high voltage
market for electricity, high voltage	5.55282e-05	remind - SSP2-NPi - 2025	PH	kilowatt hour		technosphere	5.00234e-05	electricity, high voltage
market for electricity, high voltage	1.036e-06	remind - SSP2-NPi - 2025	QA	kilowatt hour		technosphere	9.33293e-07	electricity, high voltage
market for electricity, high voltage	6.3958e-06	remind - SSP2-NPi - 2025	KH	kilowatt hour		technosphere	5.76175e-06	electricity, high voltage
market for electricity, high voltage	9.76436e-06	remind - SSP2-NPi - 2025	TJ	kilowatt hour		technosphere	8.79637e-06	electricity, high voltage
market for electricity, high voltage	7.04425e-05	remind - SSP2-NPi - 2025	PK	kilowatt hour		technosphere	6.34591e-05	electricity, high voltage
market for electricity, high voltage	3.27437e-05	remind - SSP2-NPi - 2025	IL	kilowatt hour		technosphere	2.94977e-05	electricity, high voltage
market for electricity, high voltage	9.85571e-06	remind - SSP2-NPi - 2025	TM	kilowatt hour		technosphere	8.87866e-06	electricity, high voltage
market for electricity, high voltage	1.23145e-05	remind - SSP2-NPi - 2025	MM	kilowatt hour		technosphere	1.10937e-05	electricity, high voltage
market for electricity, high voltage	2.50564e-05	remind - SSP2-NPi - 2025	SG	kilowatt hour		technosphere	2.25724e-05	electricity, high voltage
market for electricity, high voltage	0.000298233	remind - SSP2-NPi - 2025	KR	kilowatt hour		technosphere	0.000268667	electricity, high voltage
market for electricity, high voltage	0.000126018	remind - SSP2-NPi - 2025	TW	kilowatt hour		technosphere	0.000113525	electricity, high voltage
market for electricity, high voltage	6.43726e-06	remind - SSP2-NPi - 2025	GE	kilowatt hour		technosphere	5.7991e-06	electricity, high voltage
market for electricity, high voltage	7.82947e-06	remind - SSP2-NPi - 2025	LB	kilowatt hour		technosphere	7.0533e-06	electricity, high voltage
market for electricity, high voltage	3.93291e-05	remind - SSP2-NPi - 2025	BD	kilowatt hour		technosphere	3.54302e-05	electricity, high voltage
market for electricity, high voltage	1.40788e-06	remind - SSP2-NPi - 2025	YE	kilowatt hour		technosphere	1.26831e-06	electricity, high voltage
market for electricity, high voltage	8.19102e-06	remind - SSP2-NPi - 2025	LK	kilowatt hour		technosphere	7.379e-06	electricity, high voltage
market for electricity, high voltage	8.38672e-06	remind - SSP2-NPi - 2025	SY	kilowatt hour		technosphere	7.5553e-06	electricity, high voltage
market for electricity, high voltage	3.59154e-06	remind - SSP2-NPi - 2025	AM	kilowatt hour		technosphere	3.23549e-06	electricity, high voltage
market for electricity, high voltage	3.47041e-05	remind - SSP2-NPi - 2025	UZ	kilowatt hour		technosphere	3.12637e-05	electricity, high voltage
market for electricity, high voltage	9.29135e-06	remind - SSP2-NPi - 2025	JO	kilowatt hour		technosphere	8.37025e-06	electricity, high voltage
market for electricity, high voltage	0.000147174	remind - SSP2-NPi - 2025	TR	kilowatt hour		technosphere	0.000132584	electricity, high voltage
market for electricity, high voltage	4.57147e-06	remind - SSP2-NPi - 2025	MN	kilowatt hour		technosphere	4.11828e-06	electricity, high voltage
market for electricity, low voltage	1.54936e-07	remind - SSP2-NPi - 2025	JO	kilowatt hour		technosphere	1.39576e-07	electricity, low voltage
market for electricity, low voltage	3.15726e-08	remind - SSP2-NPi - 2025	BN	kilowatt hour		technosphere	2.84426e-08	electricity, low voltage
market for electricity, low voltage	8.44093e-07	remind - SSP2-NPi - 2025	KZ	kilowatt hour		technosphere	7.60414e-07	electricity, low voltage
market for electricity, low voltage	1.90869e-06	remind - SSP2-NPi - 2025	VN	kilowatt hour		technosphere	1.71947e-06	electricity, low voltage
market for electricity, low voltage	1.59172e-08	remind - SSP2-NPi - 2025	QA	kilowatt hour		technosphere	1.43392e-08	electricity, low voltage
market for electricity, low voltage	8.02443e-06	remind - SSP2-NPi - 2025	JP	kilowatt hour		technosphere	7.22893e-06	electricity, low voltage
market for electricity, low voltage	5.36768e-07	remind - SSP2-NPi - 2025	IL	kilowatt hour		technosphere	4.83556e-07	electricity, low voltage
market for electricity, low voltage	4.22588e-07	remind - SSP2-NPi - 2025	HK	kilowatt hour		technosphere	3.80695e-07	electricity, low voltage
market for electricity, low voltage	1.37609e-06	remind - SSP2-NPi - 2025	MY	kilowatt hour		technosphere	1.23967e-06	electricity, low voltage
market for electricity, low voltage	1.51604e-06	remind - SSP2-NPi - 2025	ID	kilowatt hour		technosphere	1.36575e-06	electricity, low voltage
market for electricity, low voltage	1.41457e-07	remind - SSP2-NPi - 2025	TM	kilowatt hour		technosphere	1.27433e-07	electricity, low voltage
market for electricity, low voltage	2.02039e-06	remind - SSP2-NPi - 2025	AU	kilowatt hour		technosphere	1.8201e-06	electricity, low voltage
market for electricity, low voltage	4.39189e-08	remind - SSP2-NPi - 2025	CY	kilowatt hour		technosphere	3.9565e-08	electricity, low voltage
market for electricity, low voltage	9.61134e-08	remind - SSP2-NPi - 2025	KH	kilowatt hour		technosphere	8.65851e-08	electricity, low voltage
market for electricity, low voltage	1.41695e-07	remind - SSP2-NPi - 2025	TJ	kilowatt hour		technosphere	1.27648e-07	electricity, low voltage
market for electricity, low voltage	1.1629e-07	remind - SSP2-NPi - 2025	KG	kilowatt hour		technosphere	1.04761e-07	electricity, low voltage
market for electricity, low voltage	1.24482e-07	remind - SSP2-NPi - 2025	LK	kilowatt hour		technosphere	1.12142e-07	electricity, low voltage
market for electricity, low voltage	8.41681e-07	remind - SSP2-NPi - 2025	PH	kilowatt hour		technosphere	7.5824e-07	electricity, low voltage
market for electricity, low voltage	5.27228e-07	remind - SSP2-NPi - 2025	UZ	kilowatt hour		technosphere	4.74961e-07	electricity, low voltage
market for electricity, low voltage	1.05056e-07	remind - SSP2-NPi - 2025	KP	kilowatt hour		technosphere	9.46409e-08	electricity, low voltage
market for electricity, low voltage	1.79862e-07	remind - SSP2-NPi - 2025	AZ	kilowatt hour		technosphere	1.62031e-07	electricity, low voltage
market for electricity, low voltage	2.00037e-06	remind - SSP2-NPi - 2025	TW	kilowatt hour		technosphere	1.80206e-06	electricity, low voltage
market for electricity, low voltage	3.67417e-07	remind - SSP2-NPi - 2025	NZ	kilowatt hour		technosphere	3.30993e-07	electricity, low voltage
market for electricity, low voltage	1.005e-06	remind - SSP2-NPi - 2025	TH	kilowatt hour		technosphere	9.05372e-07	electricity, low voltage
market for electricity, low voltage	4.10046e-07	remind - SSP2-NPi - 2025	SG	kilowatt hour		technosphere	3.69396e-07	electricity, low voltage
market for electricity, low voltage	1.77765e-07	remind - SSP2-NPi - 2025	MM	kilowatt hour		technosphere	1.60142e-07	electricity, low voltage
market for electricity, low voltage	2.30185e-08	remind - SSP2-NPi - 2025	YE	kilowatt hour		technosphere	2.07366e-08	electricity, low voltage
market for electricity, low voltage	5.47171e-08	remind - SSP2-NPi - 2025	AM	kilowatt hour		technosphere	4.92927e-08	electricity, low voltage
market for electricity, low voltage	9.72895e-08	remind - SSP2-NPi - 2025	GE	kilowatt hour		technosphere	8.76447e-08	electricity, low voltage
market for electricity, low voltage	1.17261e-07	remind - SSP2-NPi - 2025	LB	kilowatt hour		technosphere	1.05637e-07	electricity, low voltage
market for electricity, low voltage	5.88548e-07	remind - SSP2-NPi - 2025	BD	kilowatt hour		technosphere	5.30202e-07	electricity, low voltage
market for electricity, low voltage	4.76373e-06	remind - SSP2-NPi - 2025	KR	kilowatt hour		technosphere	4.29148e-06	electricity, low voltage
market for electricity, low voltage	1.03288e-06	remind - SSP2-NPi - 2025	PK	kilowatt hour		technosphere	9.30483e-07	electricity, low voltage
market for electricity, low voltage	1.14434e-07	remind - SSP2-NPi - 2025	SY	kilowatt hour		technosphere	1.03089e-07	electricity, low voltage
market for electricity, low voltage	2.26588e-06	remind - SSP2-NPi - 2025	TR	kilowatt hour		technosphere	2.04125e-06	electricity, low voltage
market for electricity, low voltage	1.57994e-07	remind - SSP2-NPi - 2025	BH	kilowatt hour		technosphere	1.42331e-07	electricity, low voltage
market for electricity, low voltage	6.87043e-08	remind - SSP2-NPi - 2025	MN	kilowatt hour		technosphere	6.18933e-08	electricity, low voltage
market for electricity, low voltage	3.02294e-07	remind - SSP2-NPi - 2025	OM	kilowatt hour		technosphere	2.72326e-07	electricity, low voltage
market for electricity, low voltage	6.04712e-08	remind - SSP2-NPi - 2025	NP	kilowatt hour		technosphere	5.44763e-08	electricity, low voltage
market for electricity, medium voltage	0.00561731	remind - SSP2-NPi - 2025	VN	kilowatt hour		technosphere	0.00506043	electricity, medium voltage
market for electricity, medium voltage	0.000124302	remind - SSP2-NPi - 2025	CY	kilowatt hour		technosphere	0.000111979	electricity, medium voltage
market for electricity, medium voltage	0.0015945	remind - SSP2-NPi - 2025	UZ	kilowatt hour		technosphere	0.00143643	electricity, medium voltage
market for electricity, medium voltage	0.000445141	remind - SSP2-NPi - 2025	TJ	kilowatt hour		technosphere	0.000401012	electricity, medium voltage
market for electricity, medium voltage	0.0046123	remind - SSP2-NPi - 2025	ID	kilowatt hour		technosphere	0.00415506	electricity, medium voltage
market for electricity, medium voltage	0.000372246	remind - SSP2-NPi - 2025	KG	kilowatt hour		technosphere	0.000335343	electricity, medium voltage
market for electricity, medium voltage	0.00289857	remind - SSP2-NPi - 2025	TH	kilowatt hour		technosphere	0.00261121	electricity, medium voltage
market for electricity, medium voltage	0.00254362	remind - SSP2-NPi - 2025	PH	kilowatt hour		technosphere	0.00229146	electricity, medium voltage
market for electricity, medium voltage	4.76931e-05	remind - SSP2-NPi - 2025	QA	kilowatt hour		technosphere	4.2965e-05	electricity, medium voltage
market for electricity, medium voltage	0.000292769	remind - SSP2-NPi - 2025	KH	kilowatt hour		technosphere	0.000263745	electricity, medium voltage
market for electricity, medium voltage	0.00118873	remind - SSP2-NPi - 2025	SG	kilowatt hour		technosphere	0.00107089	electricity, medium voltage
market for electricity, medium voltage	0.0137499	remind - SSP2-NPi - 2025	KR	kilowatt hour		technosphere	0.0123868	electricity, medium voltage
market for electricity, medium voltage	0.00581369	remind - SSP2-NPi - 2025	TW	kilowatt hour		technosphere	0.00523735	electricity, medium voltage
market for electricity, medium voltage	0.00110368	remind - SSP2-NPi - 2025	NZ	kilowatt hour		technosphere	0.000994268	electricity, medium voltage
market for electricity, medium voltage	0.000295498	remind - SSP2-NPi - 2025	GE	kilowatt hour		technosphere	0.000266204	electricity, medium voltage
market for electricity, medium voltage	0.000358333	remind - SSP2-NPi - 2025	LB	kilowatt hour		technosphere	0.00032281	electricity, medium voltage
market for electricity, medium voltage	0.00150609	remind - SSP2-NPi - 2025	IL	kilowatt hour		technosphere	0.00135678	electricity, medium voltage
market for electricity, medium voltage	0.000448485	remind - SSP2-NPi - 2025	TM	kilowatt hour		technosphere	0.000404024	electricity, medium voltage
market for electricity, medium voltage	0.000560672	remind - SSP2-NPi - 2025	MM	kilowatt hour		technosphere	0.00050509	electricity, medium voltage
market for electricity, medium voltage	6.27497e-05	remind - SSP2-NPi - 2025	YE	kilowatt hour		technosphere	5.6529e-05	electricity, medium voltage
market for electricity, medium voltage	0.00321319	remind - SSP2-NPi - 2025	PK	kilowatt hour		technosphere	0.00289465	electricity, medium voltage
market for electricity, medium voltage	0.000164746	remind - SSP2-NPi - 2025	AM	kilowatt hour		technosphere	0.000148414	electricity, medium voltage
market for electricity, medium voltage	0.000548481	remind - SSP2-NPi - 2025	AZ	kilowatt hour		technosphere	0.000494107	electricity, medium voltage
market for electricity, medium voltage	0.00672444	remind - SSP2-NPi - 2025	TR	kilowatt hour		technosphere	0.00605781	electricity, medium voltage
market for electricity, medium voltage	0.00180017	remind - SSP2-NPi - 2025	BD	kilowatt hour		technosphere	0.00162171	electricity, medium voltage
market for electricity, medium voltage	0.000378521	remind - SSP2-NPi - 2025	SY	kilowatt hour		technosphere	0.000340996	electricity, medium voltage
market for electricity, medium voltage	0.000464096	remind - SSP2-NPi - 2025	BH	kilowatt hour		technosphere	0.000418088	electricity, medium voltage
market for electricity, medium voltage	0.000375773	remind - SSP2-NPi - 2025	LK	kilowatt hour		technosphere	0.000338521	electricity, medium voltage
market for electricity, medium voltage	0.000422106	remind - SSP2-NPi - 2025	JO	kilowatt hour		technosphere	0.000380261	electricity, medium voltage
market for electricity, medium voltage	0.0220102	remind - SSP2-NPi - 2025	JP	kilowatt hour		technosphere	0.0198282	electricity, medium voltage
market for electricity, medium voltage	0.000334035	remind - SSP2-NPi - 2025	KP	kilowatt hour		technosphere	0.000300921	electricity, medium voltage
market for electricity, medium voltage	9.7004e-05	remind - SSP2-NPi - 2025	BN	kilowatt hour		technosphere	8.73875e-05	electricity, medium voltage
market for electricity, medium voltage	0.000209182	remind - SSP2-NPi - 2025	MN	kilowatt hour		technosphere	0.000188444	electricity, medium voltage
market for electricity, medium voltage	0.000927007	remind - SSP2-NPi - 2025	OM	kilowatt hour		technosphere	0.000835108	electricity, medium voltage
market for electricity, medium voltage	0.00255754	remind - SSP2-NPi - 2025	KZ	kilowatt hour		technosphere	0.00230399	electricity, medium voltage
market for electricity, medium voltage	0.00125169	remind - SSP2-NPi - 2025	HK	kilowatt hour		technosphere	0.00112761	electricity, medium voltage
market for electricity, medium voltage	0.000191579	remind - SSP2-NPi - 2025	NP	kilowatt hour		technosphere	0.000172587	electricity, medium voltage
market for electricity, medium voltage	0.00563144	remind - SSP2-NPi - 2025	AU	kilowatt hour		technosphere	0.00507316	electricity, medium voltage
market for electricity, medium voltage	0.00412886	remind - SSP2-NPi - 2025	MY	kilowatt hour		technosphere	0.00371954	electricity, medium voltage
market for electrode, negative, Ni	0.000367128	remind - SSP2-NPi - 2025	GLO	kilogram		technosphere	0.000367128	electrode, negative, Ni
market for ethylene glycol	2.22266e-08	remind - SSP2-NPi - 2025	GLO	kilogram		technosphere	2.22266e-08	ethylene glycol
market for ferrochromium, high-carbon, 68% Cr	0.000644406	remind - SSP2-NPi - 2025	GLO	kilogram		technosphere	0.000644406	ferrochromium, high-carbon, 68% Cr
market for ferromanganese, high-coal, 74.5% Mn	0.00755982	remind - SSP2-NPi - 2025	GLO	kilogram		technosphere	0.00681038	ferromanganese, high-coal, 74.5% Mn
market for ferrosilicon	0.00654687	remind - SSP2-NPi - 2025	GLO	kilogram		technosphere	0.00654687	ferrosilicon
market for fluorspar, 97% purity	1.5411e-05	remind - SSP2-NPi - 2025	GLO	kilogram		technosphere	1.5411e-05	fluorspar, 97% purity
market for hard coal	0.00721441	remind - SSP2-NPi - 2025	RoW	kilogram		technosphere	0.00649921	hard coal
market for heat, district or industrial, natural gas	0.0114557	remind - SSP2-NPi - 2025	RoW	megajoule		technosphere	0.01032	heat, district or industrial, natural gas
market for heat, district or industrial, other than natural gas	0.00323011	remind - SSP2-NPi - 2025	RoW	megajoule		technosphere	0.0029099	heat, district or industrial, other than natural gas
market for heavy fuel oil	0.000125876	remind - SSP2-NPi - 2025	RoW	kilogram		technosphere	0.000113397	heavy fuel oil
market for hot rolling, steel	1	remind - SSP2-NPi - 2025	GLO	kilogram		technosphere	1	hot rolling, steel
market for hydrochloric acid, without water, in 30% solution state	1.23711e-05	remind - SSP2-NPi - 2025	RoW	kilogram		technosphere	1.23711e-05	hydrochloric acid, without water, in 30% solution state
market for inert waste	-0.000696008	remind - SSP2-NPi - 2025	RoW	kilogram		technosphere	-0.000696008	inert waste
market for inert waste, for final disposal	-0.00734125	remind - SSP2-NPi - 2025	RoW	kilogram		technosphere	-0.00734125	inert waste, for final disposal
market for iron scrap, sorted, pressed	0	remind - SSP2-NPi - 2025	RoW	kilogram		technosphere	0	iron scrap, sorted, pressed
market for iron scrap, unsorted	0	remind - SSP2-NPi - 2025	GLO	kilogram		technosphere	0	iron scrap, unsorted
market for lime	0.0132342	remind - SSP2-NPi - 2025	RoW	kilogram		technosphere	0.0132342	lime
market for liquefied petroleum gas	0.000214812	remind - SSP2-NPi - 2025	RoW	kilogram		technosphere	0.000193516	liquefied petroleum gas
market for lubricating oil	0.021116	remind - SSP2-NPi - 2025	RoW	kilogram		technosphere	0.0190226	lubricating oil
market for molybdenum trioxide	9.45811e-06	remind - SSP2-NPi - 2025	GLO	kilogram		technosphere	9.45811e-06	molybdenum trioxide
market for natural gas, high pressure	0.00649376	remind - SSP2-NPi - 2025	RoW	cubic meter		technosphere	0.00585	natural gas, high pressure
market for nickel, class 1	2.22266e-05	remind - SSP2-NPi - 2025	GLO	kilogram		technosphere	2.22266e-05	nickel, class 1
market for nitrogen, liquid	0.0120712	remind - SSP2-NPi - 2025	RoW	kilogram		technosphere	0.0120712	nitrogen, liquid
market for oxygen, liquid	0.0359034	remind - SSP2-NPi - 2025	World	kilogram		technosphere	0.0359034	oxygen, liquid
market for pig iron	0.1432	remind - SSP2-NPi - 2025	World	kilogram		technosphere	0.1432	pig iron
market for propane, burned in building machine	1.29106e-05	remind - SSP2-NPi - 2025	GLO	megajoule		technosphere	1.29106e-05	propane, burned in building machine
market for quicklime, in pieces, loose	0.0413549	remind - SSP2-NPi - 2025	RoW	kilogram		technosphere	0.0413549	quicklime, in pieces, loose
market for refractory, basic, packed	0.0145136	remind - SSP2-NPi - 2025	GLO	kilogram		technosphere	0.0145136	refractory, basic, packed
market for silica sand	2.11069e-05	remind - SSP2-NPi - 2025	GLO	kilogram		technosphere	2.11069e-05	silica sand
market for spent solvent mixture	-2.22266e-08	remind - SSP2-NPi - 2025	RoW	kilogram		technosphere	-2.22266e-08	spent solvent mixture
market for sponge iron	0.174986	remind - SSP2-NPi - 2025	GLO	kilogram		technosphere	0.174986	sponge iron
market for sulfur dioxide, liquid	8.61273e-06	remind - SSP2-NPi - 2025	RoW	kilogram		technosphere	8.61273e-06	sulfur dioxide, liquid
market for sulfuric acid	6.75775e-06	remind - SSP2-NPi - 2025	RoW	kilogram		technosphere	6.75775e-06	sulfuric acid
market for wastewater from pig iron production	-0.028223	remind - SSP2-NPi - 2025	RoW	cubic meter		technosphere	-0.028223	wastewater from pig iron production
market group for electricity, high voltage	0.000191016	remind - SSP2-NPi - 2025	Canada without Quebec	kilowatt hour		technosphere	0.000172079	electricity, high voltage
market group for electricity, high voltage	0.00040867	remind - SSP2-NPi - 2025	RAF	kilowatt hour		technosphere	0.000368156	electricity, high voltage
market group for electricity, high voltage	0.000815925	remind - SSP2-NPi - 2025	RLA	kilowatt hour		technosphere	0.000735038	electricity, high voltage
market group for electricity, high voltage	0.000460268	remind - SSP2-NPi - 2025	RME	kilowatt hour		technosphere	0.000414639	electricity, high voltage
market group for electricity, high voltage	0.00427049	remind - SSP2-NPi - 2025	CN	kilowatt hour		technosphere	0.00384713	electricity, high voltage
market group for electricity, high voltage	0.00227711	remind - SSP2-NPi - 2025	US	kilowatt hour		technosphere	0.00205136	electricity, high voltage
market group for electricity, low voltage	1.17905e-05	remind - SSP2-NPi - 2025	RLA	kilowatt hour		technosphere	1.06217e-05	electricity, low voltage
market group for electricity, low voltage	6.55855e-05	remind - SSP2-NPi - 2025	CN	kilowatt hour		technosphere	5.90837e-05	electricity, low voltage
market group for electricity, low voltage	6.83821e-06	remind - SSP2-NPi - 2025	RME	kilowatt hour		technosphere	6.1603e-06	electricity, low voltage
market group for electricity, low voltage	3.58941e-05	remind - SSP2-NPi - 2025	US	kilowatt hour		technosphere	3.23357e-05	electricity, low voltage
market group for electricity, low voltage	2.95392e-06	remind - SSP2-NPi - 2025	Canada without Quebec	kilowatt hour		technosphere	2.66109e-06	electricity, low voltage
market group for electricity, low voltage	5.94949e-06	remind - SSP2-NPi - 2025	RAF	kilowatt hour		technosphere	5.35969e-06	electricity, low voltage
market group for electricity, medium voltage	0.021019	remind - SSP2-NPi - 2025	RME	kilowatt hour		technosphere	0.0189353	electricity, medium voltage
market group for electricity, medium voltage	0.0370612	remind - SSP2-NPi - 2025	RLA	kilowatt hour		technosphere	0.0333871	electricity, medium voltage
market group for electricity, medium voltage	0.105089	remind - SSP2-NPi - 2025	US	kilowatt hour		technosphere	0.0946714	electricity, medium voltage
market group for electricity, medium voltage	0.196582	remind - SSP2-NPi - 2025	CN	kilowatt hour		technosphere	0.177094	electricity, medium voltage
market group for electricity, medium voltage	0.0185997	remind - SSP2-NPi - 2025	RAF	kilowatt hour		technosphere	0.0167558	electricity, medium voltage
market group for electricity, medium voltage	0.00879503	remind - SSP2-NPi - 2025	Canada without Quebec	kilowatt hour		technosphere	0.00792313	electricity, medium voltage
preperation for recycling, steel scrap, from fossil infrastructure, 2025	0.847823	steel_prod_SSP2-NPi	GLO	kilogram		technosphere	0.847823	steel scrap, from fossil infrastructure
treatment of electric arc furnace dust, residual material landfill, pessimistic, 2025	-0.0280052	steel_prod_SSP2-NPi	RoW	kilogram		technosphere	-0.0280052	electric arc furnace dust
treatment of electric arc furnace slag, residual material landfill, pessimistic, 2025	-0.105263	steel_prod_SSP2-NPi	GLO	kilogram		technosphere	-0.105263	electric arc furnace slag
Activity	steel production, electric, reinforcing steel, optimistic, 2025
code	1b745002a9e14ad087ad5831cee4fe4c
comment	This dataset has been modified by `premise`, according to the performance for steel production indicated by the IAM model REMIND for the IAM region World in 2100, following the scenario SSP1-NDC. The energy efficiency of the process has been improved by 10%.This activity represents the production of secondary low-alloyed steel in an electric arc furnace (EAF). The process comprises the following …
location	World
reference product	reinforcing steel
scenario	SSP2-NPi
type	process
unit	kilogram
worksheet name	steel_prod_SSP2-NPi
year	2025
Exchanges
name	amount	database	location	unit	categories	type	default_amount	reference product
Antimony ion	4.20301e-10			kilogram	air	biosphere
Argon-40	1.55606e-05			kilogram	air	biosphere
Arsenic ion	4.75423e-10			kilogram	air	biosphere
Benzene	8.48637e-07			kilogram	air	biosphere
Benzene, hexachloro-	6.42293e-09			kilogram	air	biosphere
Cadmium II	1.91118e-08			kilogram	air	biosphere
Cadmium II	1.21518e-09			kilogram	air::urban air close to ground	biosphere
Cadmium II	1.62024e-11			kilogram	water	biosphere
Carbon dioxide, fossil	0.0448951			kilogram	air	biosphere
Carbon dioxide, fossil	0.00494661			kilogram	air::urban air close to ground	biosphere
Carbon dioxide, non-fossil	9.82157e-05			kilogram	air	biosphere
Carbon monoxide, fossil	0.000926546			kilogram	air	biosphere
Carbon monoxide, fossil	4.1135e-05			kilogram	air::urban air close to ground	biosphere
Chloride	7.17664e-05			kilogram	water	biosphere
Chromium III	2.97044e-09			kilogram	air::urban air close to ground	biosphere
Chromium III	4.7308e-07			kilogram	air	biosphere
Chromium VI	7.55436e-08			kilogram	water	biosphere
Chromium VI	2.48047e-10			kilogram	air	biosphere
Cobalt II	2.80201e-10			kilogram	air	biosphere
Copper ion	4.18562e-09			kilogram	air::urban air close to ground	biosphere
Copper ion	7.96923e-09			kilogram	water	biosphere
Copper ion	1.10953e-07			kilogram	air	biosphere
Dioxins, measured as 2,3,7,8-tetrachlorodibenzo-p-dioxin	1.56301e-12			kilogram	air	biosphere
Dioxins, measured as 2,3,7,8-tetrachlorodibenzo-p-dioxin	5.4008e-15			kilogram	air::urban air close to ground	biosphere
Hydrocarbons, aromatic	6.88555e-05			kilogram	air	biosphere
Hydrochloric acid	4.71748e-06			kilogram	air	biosphere
Hydrochloric acid	5.71134e-08			kilogram	air::urban air close to ground	biosphere
Hydrogen fluoride	6.6877e-07			kilogram	air	biosphere
Lead II	1.62024e-09			kilogram	water	biosphere
Lead II	7.97328e-07			kilogram	air	biosphere
Lead II	4.92823e-08			kilogram	air::urban air close to ground	biosphere
Manganese II	7.00502e-10			kilogram	air	biosphere
Mercury II	7.96618e-09			kilogram	air::urban air close to ground	biosphere
Mercury II	6.24269e-07			kilogram	air	biosphere
Mercury II	3.24048e-11			kilogram	water	biosphere
Methane, fossil	2.03852e-06			kilogram	air::urban air close to ground	biosphere
NMVOC, non-methane volatile organic compounds	2.03853e-06			kilogram	air::urban air close to ground	biosphere
Nickel II	2.43483e-07			kilogram	air	biosphere
Nickel II	2.7004e-10			kilogram	air::urban air close to ground	biosphere
Nickel II	3.30869e-10			kilogram	water	biosphere
Nitrogen oxides	7.31565e-06			kilogram	air::urban air close to ground	biosphere
Nitrogen oxides	0.000101937			kilogram	air	biosphere
PAH, polycyclic aromatic hydrocarbons	6.79146e-08			kilogram	air	biosphere
PAH, polycyclic aromatic hydrocarbons	1.14767e-08			kilogram	air::urban air close to ground	biosphere
Particulate Matter, < 2.5 um	5.62815e-05			kilogram	air	biosphere
Particulate Matter, < 2.5 um	7.12244e-07			kilogram	air::urban air close to ground	biosphere
Particulate Matter, > 10 um	2.5138e-07			kilogram	air::urban air close to ground	biosphere
Particulate Matter, > 10 um	1.9494e-05			kilogram	air	biosphere
Particulate Matter, > 2.5 um and < 10um	5.6355e-05			kilogram	air	biosphere
Particulate Matter, > 2.5 um and < 10um	7.12244e-07			kilogram	air::urban air close to ground	biosphere
Phosphorus	1.97059e-11			kilogram	water	biosphere
Polychlorinated biphenyls	6.49506e-09			kilogram	air	biosphere
Polychlorinated biphenyls	7.4261e-11			kilogram	air::urban air close to ground	biosphere
Selenium IV	2.80201e-10			kilogram	air	biosphere
Sulfate	5.12171e-08			kilogram	water	biosphere
Sulfur dioxide	1.90243e-07			kilogram	air::urban air close to ground	biosphere
Sulfur dioxide	5.20581e-05			kilogram	air	biosphere
Tellurium	5.62699e-10			kilogram	air	biosphere
Tin ion	7.00502e-10			kilogram	air	biosphere
Titanium ion	2.80201e-10			kilogram	air	biosphere
Vanadium V	7.00502e-10			kilogram	air	biosphere
Water	0.00147176			cubic meter	water	biosphere
Water	7.22231e-05			cubic meter	air::urban air close to ground	biosphere
Water	0.00887165			cubic meter	air	biosphere
Water, cooling, unspecified natural origin	0.00417675			cubic meter	natural resource::in water	biosphere
Water, unspecified natural origin	0.0352786			cubic meter	natural resource::in ground	biosphere
Zinc II	7.24922e-07			kilogram	air::urban air close to ground	biosphere
Zinc II	7.84638e-06			kilogram	air	biosphere
Zinc II	2.66075e-08			kilogram	water	biosphere
steel production, electric, reinforcing steel, optimistic, 2025	1	steel_prod_SSP2-NPi	World	kilogram		production	1	reinforcing steel
electric arc furnace slag, for recovery, Recycled Content cut-off	-0.00399409	remind - SSP2-NPi - 2025	GLO	kilogram		technosphere	-0.00399409	electric arc furnace slag, for recovery
market for aluminium, cast alloy	0.000108691	remind - SSP2-NPi - 2025	GLO	kilogram		technosphere	0.000108691	aluminium, cast alloy
market for aluminium, primary, ingot	4.36378e-07	remind - SSP2-NPi - 2025	RoW	kilogram		technosphere	4.36378e-07	aluminium, primary, ingot
market for aluminium, wrought alloy	0.000108068	remind - SSP2-NPi - 2025	GLO	kilogram		technosphere	0.000108068	aluminium, wrought alloy
market for anode, for metal electrolysis	0.00234417	remind - SSP2-NPi - 2025	GLO	kilogram		technosphere	0.00234417	anode, for metal electrolysis
market for argon, liquid	0.000690895	remind - SSP2-NPi - 2025	RoW	kilogram		technosphere	0.000690895	argon, liquid
market for calcium carbide, technical grade	3.16949e-06	remind - SSP2-NPi - 2025	RoW	kilogram		technosphere	3.16949e-06	calcium carbide, technical grade
market for cast iron	0	remind - SSP2-NPi - 2025	GLO	kilogram		technosphere	0	cast iron
market for chemical, inorganic	1.82263e-06	remind - SSP2-NPi - 2025	GLO	kilogram		technosphere	1.82263e-06	chemical, inorganic
market for coke	0.00332933	remind - SSP2-NPi - 2025	GLO	megajoule		technosphere	0.00299928	coke
market for diesel, burned in building machine	1.62016e-05	remind - SSP2-NPi - 2025	World	megajoule		technosphere	1.45954e-05	diesel, burned in building machine
market for dolomite	0.0120311	remind - SSP2-NPi - 2025	RoW	kilogram		technosphere	0.0120311	dolomite
market for electric arc furnace converter	4.02495e-11	remind - SSP2-NPi - 2025	GLO	unit		technosphere	4.02495e-11	electric arc furnace converter
market for electric arc furnace dust	0	remind - SSP2-NPi - 2025	RoW	kilogram		technosphere	0	electric arc furnace dust
market for electric arc furnace secondary metallurgy slag	0	remind - SSP2-NPi - 2025	RoW	kilogram		technosphere	0	electric arc furnace secondary metallurgy slag
market for electric arc furnace slag	0	remind - SSP2-NPi - 2025	RoW	kilogram		technosphere	0	electric arc furnace slag
market for electricity, high voltage	7.34725e-06	remind - SSP2-NPi - 2025	KP	kilowatt hour		technosphere	6.61888e-06	electricity, high voltage
market for electricity, high voltage	0.000471592	remind - SSP2-NPi - 2025	JP	kilowatt hour		technosphere	0.000424841	electricity, high voltage
market for electricity, high voltage	2.02352e-05	remind - SSP2-NPi - 2025	OM	kilowatt hour		technosphere	1.82291e-05	electricity, high voltage
market for electricity, high voltage	0.000122632	remind - SSP2-NPi - 2025	AU	kilowatt hour		technosphere	0.000110475	electricity, high voltage
market for electricity, high voltage	5.58122e-05	remind - SSP2-NPi - 2025	KZ	kilowatt hour		technosphere	5.02792e-05	electricity, high voltage
market for electricity, high voltage	2.40065e-05	remind - SSP2-NPi - 2025	NZ	kilowatt hour		technosphere	2.16266e-05	electricity, high voltage
market for electricity, high voltage	2.71236e-05	remind - SSP2-NPi - 2025	HK	kilowatt hour		technosphere	2.44347e-05	electricity, high voltage
market for electricity, high voltage	8.19579e-06	remind - SSP2-NPi - 2025	KG	kilowatt hour		technosphere	7.3833e-06	electricity, high voltage
market for electricity, high voltage	1.00383e-05	remind - SSP2-NPi - 2025	BH	kilowatt hour		technosphere	9.04311e-06	electricity, high voltage
market for electricity, high voltage	2.69959e-06	remind - SSP2-NPi - 2025	CY	kilowatt hour		technosphere	2.43196e-06	electricity, high voltage
market for electricity, high voltage	8.9857e-05	remind - SSP2-NPi - 2025	MY	kilowatt hour		technosphere	8.0949e-05	electricity, high voltage
market for electricity, high voltage	4.20953e-06	remind - SSP2-NPi - 2025	NP	kilowatt hour		technosphere	3.79222e-06	electricity, high voltage
market for electricity, high voltage	0.000100529	remind - SSP2-NPi - 2025	ID	kilowatt hour		technosphere	9.05628e-05	electricity, high voltage
market for electricity, high voltage	1.1965e-05	remind - SSP2-NPi - 2025	AZ	kilowatt hour		technosphere	1.07788e-05	electricity, high voltage
market for electricity, high voltage	2.11845e-06	remind - SSP2-NPi - 2025	BN	kilowatt hour		technosphere	1.90844e-06	electricity, high voltage
market for electricity, high voltage	0.000122282	remind - SSP2-NPi - 2025	VN	kilowatt hour		technosphere	0.000110159	electricity, high voltage
market for electricity, high voltage	6.3224e-05	remind - SSP2-NPi - 2025	TH	kilowatt hour		technosphere	5.69563e-05	electricity, high voltage
market for electricity, high voltage	5.55282e-05	remind - SSP2-NPi - 2025	PH	kilowatt hour		technosphere	5.00234e-05	electricity, high voltage
market for electricity, high voltage	1.036e-06	remind - SSP2-NPi - 2025	QA	kilowatt hour		technosphere	9.33293e-07	electricity, high voltage
market for electricity, high voltage	6.3958e-06	remind - SSP2-NPi - 2025	KH	kilowatt hour		technosphere	5.76175e-06	electricity, high voltage
market for electricity, high voltage	9.76436e-06	remind - SSP2-NPi - 2025	TJ	kilowatt hour		technosphere	8.79637e-06	electricity, high voltage
market for electricity, high voltage	7.04425e-05	remind - SSP2-NPi - 2025	PK	kilowatt hour		technosphere	6.34591e-05	electricity, high voltage
market for electricity, high voltage	3.27437e-05	remind - SSP2-NPi - 2025	IL	kilowatt hour		technosphere	2.94977e-05	electricity, high voltage
market for electricity, high voltage	9.85571e-06	remind - SSP2-NPi - 2025	TM	kilowatt hour		technosphere	8.87866e-06	electricity, high voltage
market for electricity, high voltage	1.23145e-05	remind - SSP2-NPi - 2025	MM	kilowatt hour		technosphere	1.10937e-05	electricity, high voltage
market for electricity, high voltage	2.50564e-05	remind - SSP2-NPi - 2025	SG	kilowatt hour		technosphere	2.25724e-05	electricity, high voltage
market for electricity, high voltage	0.000298233	remind - SSP2-NPi - 2025	KR	kilowatt hour		technosphere	0.000268667	electricity, high voltage
market for electricity, high voltage	0.000126018	remind - SSP2-NPi - 2025	TW	kilowatt hour		technosphere	0.000113525	electricity, high voltage
market for electricity, high voltage	6.43726e-06	remind - SSP2-NPi - 2025	GE	kilowatt hour		technosphere	5.7991e-06	electricity, high voltage
market for electricity, high voltage	7.82947e-06	remind - SSP2-NPi - 2025	LB	kilowatt hour		technosphere	7.0533e-06	electricity, high voltage
market for electricity, high voltage	3.93291e-05	remind - SSP2-NPi - 2025	BD	kilowatt hour		technosphere	3.54302e-05	electricity, high voltage
market for electricity, high voltage	1.40788e-06	remind - SSP2-NPi - 2025	YE	kilowatt hour		technosphere	1.26831e-06	electricity, high voltage
market for electricity, high voltage	8.19102e-06	remind - SSP2-NPi - 2025	LK	kilowatt hour		technosphere	7.379e-06	electricity, high voltage
market for electricity, high voltage	8.38672e-06	remind - SSP2-NPi - 2025	SY	kilowatt hour		technosphere	7.5553e-06	electricity, high voltage
market for electricity, high voltage	3.59154e-06	remind - SSP2-NPi - 2025	AM	kilowatt hour		technosphere	3.23549e-06	electricity, high voltage
market for electricity, high voltage	3.47041e-05	remind - SSP2-NPi - 2025	UZ	kilowatt hour		technosphere	3.12637e-05	electricity, high voltage
market for electricity, high voltage	9.29135e-06	remind - SSP2-NPi - 2025	JO	kilowatt hour		technosphere	8.37025e-06	electricity, high voltage
market for electricity, high voltage	0.000147174	remind - SSP2-NPi - 2025	TR	kilowatt hour		technosphere	0.000132584	electricity, high voltage
market for electricity, high voltage	4.57147e-06	remind - SSP2-NPi - 2025	MN	kilowatt hour		technosphere	4.11828e-06	electricity, high voltage
market for electricity, low voltage	1.54936e-07	remind - SSP2-NPi - 2025	JO	kilowatt hour		technosphere	1.39576e-07	electricity, low voltage
market for electricity, low voltage	3.15726e-08	remind - SSP2-NPi - 2025	BN	kilowatt hour		technosphere	2.84426e-08	electricity, low voltage
market for electricity, low voltage	8.44093e-07	remind - SSP2-NPi - 2025	KZ	kilowatt hour		technosphere	7.60414e-07	electricity, low voltage
market for electricity, low voltage	1.90869e-06	remind - SSP2-NPi - 2025	VN	kilowatt hour		technosphere	1.71947e-06	electricity, low voltage
market for electricity, low voltage	1.59172e-08	remind - SSP2-NPi - 2025	QA	kilowatt hour		technosphere	1.43392e-08	electricity, low voltage
market for electricity, low voltage	8.02443e-06	remind - SSP2-NPi - 2025	JP	kilowatt hour		technosphere	7.22893e-06	electricity, low voltage
market for electricity, low voltage	5.36768e-07	remind - SSP2-NPi - 2025	IL	kilowatt hour		technosphere	4.83556e-07	electricity, low voltage
market for electricity, low voltage	4.22588e-07	remind - SSP2-NPi - 2025	HK	kilowatt hour		technosphere	3.80695e-07	electricity, low voltage
market for electricity, low voltage	1.37609e-06	remind - SSP2-NPi - 2025	MY	kilowatt hour		technosphere	1.23967e-06	electricity, low voltage
market for electricity, low voltage	1.51604e-06	remind - SSP2-NPi - 2025	ID	kilowatt hour		technosphere	1.36575e-06	electricity, low voltage
market for electricity, low voltage	1.41457e-07	remind - SSP2-NPi - 2025	TM	kilowatt hour		technosphere	1.27433e-07	electricity, low voltage
market for electricity, low voltage	2.02039e-06	remind - SSP2-NPi - 2025	AU	kilowatt hour		technosphere	1.8201e-06	electricity, low voltage
market for electricity, low voltage	4.39189e-08	remind - SSP2-NPi - 2025	CY	kilowatt hour		technosphere	3.9565e-08	electricity, low voltage
market for electricity, low voltage	9.61134e-08	remind - SSP2-NPi - 2025	KH	kilowatt hour		technosphere	8.65851e-08	electricity, low voltage
market for electricity, low voltage	1.41695e-07	remind - SSP2-NPi - 2025	TJ	kilowatt hour		technosphere	1.27648e-07	electricity, low voltage
market for electricity, low voltage	1.1629e-07	remind - SSP2-NPi - 2025	KG	kilowatt hour		technosphere	1.04761e-07	electricity, low voltage
market for electricity, low voltage	1.24482e-07	remind - SSP2-NPi - 2025	LK	kilowatt hour		technosphere	1.12142e-07	electricity, low voltage
market for electricity, low voltage	8.41681e-07	remind - SSP2-NPi - 2025	PH	kilowatt hour		technosphere	7.5824e-07	electricity, low voltage
market for electricity, low voltage	5.27228e-07	remind - SSP2-NPi - 2025	UZ	kilowatt hour		technosphere	4.74961e-07	electricity, low voltage
market for electricity, low voltage	1.05056e-07	remind - SSP2-NPi - 2025	KP	kilowatt hour		technosphere	9.46409e-08	electricity, low voltage
market for electricity, low voltage	1.79862e-07	remind - SSP2-NPi - 2025	AZ	kilowatt hour		technosphere	1.62031e-07	electricity, low voltage
market for electricity, low voltage	2.00037e-06	remind - SSP2-NPi - 2025	TW	kilowatt hour		technosphere	1.80206e-06	electricity, low voltage
market for electricity, low voltage	3.67417e-07	remind - SSP2-NPi - 2025	NZ	kilowatt hour		technosphere	3.30993e-07	electricity, low voltage
market for electricity, low voltage	1.005e-06	remind - SSP2-NPi - 2025	TH	kilowatt hour		technosphere	9.05372e-07	electricity, low voltage
market for electricity, low voltage	4.10046e-07	remind - SSP2-NPi - 2025	SG	kilowatt hour		technosphere	3.69396e-07	electricity, low voltage
market for electricity, low voltage	1.77765e-07	remind - SSP2-NPi - 2025	MM	kilowatt hour		technosphere	1.60142e-07	electricity, low voltage
market for electricity, low voltage	2.30185e-08	remind - SSP2-NPi - 2025	YE	kilowatt hour		technosphere	2.07366e-08	electricity, low voltage
market for electricity, low voltage	5.47171e-08	remind - SSP2-NPi - 2025	AM	kilowatt hour		technosphere	4.92927e-08	electricity, low voltage
market for electricity, low voltage	9.72895e-08	remind - SSP2-NPi - 2025	GE	kilowatt hour		technosphere	8.76447e-08	electricity, low voltage
market for electricity, low voltage	1.17261e-07	remind - SSP2-NPi - 2025	LB	kilowatt hour		technosphere	1.05637e-07	electricity, low voltage
market for electricity, low voltage	5.88548e-07	remind - SSP2-NPi - 2025	BD	kilowatt hour		technosphere	5.30202e-07	electricity, low voltage
market for electricity, low voltage	4.76373e-06	remind - SSP2-NPi - 2025	KR	kilowatt hour		technosphere	4.29148e-06	electricity, low voltage
market for electricity, low voltage	1.03288e-06	remind - SSP2-NPi - 2025	PK	kilowatt hour		technosphere	9.30483e-07	electricity, low voltage
market for electricity, low voltage	1.14434e-07	remind - SSP2-NPi - 2025	SY	kilowatt hour		technosphere	1.03089e-07	electricity, low voltage
market for electricity, low voltage	2.26588e-06	remind - SSP2-NPi - 2025	TR	kilowatt hour		technosphere	2.04125e-06	electricity, low voltage
market for electricity, low voltage	1.57994e-07	remind - SSP2-NPi - 2025	BH	kilowatt hour		technosphere	1.42331e-07	electricity, low voltage
market for electricity, low voltage	6.87043e-08	remind - SSP2-NPi - 2025	MN	kilowatt hour		technosphere	6.18933e-08	electricity, low voltage
market for electricity, low voltage	3.02294e-07	remind - SSP2-NPi - 2025	OM	kilowatt hour		technosphere	2.72326e-07	electricity, low voltage
market for electricity, low voltage	6.04712e-08	remind - SSP2-NPi - 2025	NP	kilowatt hour		technosphere	5.44763e-08	electricity, low voltage
market for electricity, medium voltage	0.00561731	remind - SSP2-NPi - 2025	VN	kilowatt hour		technosphere	0.00506043	electricity, medium voltage
market for electricity, medium voltage	0.000124302	remind - SSP2-NPi - 2025	CY	kilowatt hour		technosphere	0.000111979	electricity, medium voltage
market for electricity, medium voltage	0.0015945	remind - SSP2-NPi - 2025	UZ	kilowatt hour		technosphere	0.00143643	electricity, medium voltage
market for electricity, medium voltage	0.000445141	remind - SSP2-NPi - 2025	TJ	kilowatt hour		technosphere	0.000401012	electricity, medium voltage
market for electricity, medium voltage	0.0046123	remind - SSP2-NPi - 2025	ID	kilowatt hour		technosphere	0.00415506	electricity, medium voltage
market for electricity, medium voltage	0.000372246	remind - SSP2-NPi - 2025	KG	kilowatt hour		technosphere	0.000335343	electricity, medium voltage
market for electricity, medium voltage	0.00289857	remind - SSP2-NPi - 2025	TH	kilowatt hour		technosphere	0.00261121	electricity, medium voltage
market for electricity, medium voltage	0.00254362	remind - SSP2-NPi - 2025	PH	kilowatt hour		technosphere	0.00229146	electricity, medium voltage
market for electricity, medium voltage	4.76931e-05	remind - SSP2-NPi - 2025	QA	kilowatt hour		technosphere	4.2965e-05	electricity, medium voltage
market for electricity, medium voltage	0.000292769	remind - SSP2-NPi - 2025	KH	kilowatt hour		technosphere	0.000263745	electricity, medium voltage
market for electricity, medium voltage	0.00118873	remind - SSP2-NPi - 2025	SG	kilowatt hour		technosphere	0.00107089	electricity, medium voltage
market for electricity, medium voltage	0.0137499	remind - SSP2-NPi - 2025	KR	kilowatt hour		technosphere	0.0123868	electricity, medium voltage
market for electricity, medium voltage	0.00581369	remind - SSP2-NPi - 2025	TW	kilowatt hour		technosphere	0.00523735	electricity, medium voltage
market for electricity, medium voltage	0.00110368	remind - SSP2-NPi - 2025	NZ	kilowatt hour		technosphere	0.000994268	electricity, medium voltage
market for electricity, medium voltage	0.000295498	remind - SSP2-NPi - 2025	GE	kilowatt hour		technosphere	0.000266204	electricity, medium voltage
market for electricity, medium voltage	0.000358333	remind - SSP2-NPi - 2025	LB	kilowatt hour		technosphere	0.00032281	electricity, medium voltage
market for electricity, medium voltage	0.00150609	remind - SSP2-NPi - 2025	IL	kilowatt hour		technosphere	0.00135678	electricity, medium voltage
market for electricity, medium voltage	0.000448485	remind - SSP2-NPi - 2025	TM	kilowatt hour		technosphere	0.000404024	electricity, medium voltage
market for electricity, medium voltage	0.000560672	remind - SSP2-NPi - 2025	MM	kilowatt hour		technosphere	0.00050509	electricity, medium voltage
market for electricity, medium voltage	6.27497e-05	remind - SSP2-NPi - 2025	YE	kilowatt hour		technosphere	5.6529e-05	electricity, medium voltage
market for electricity, medium voltage	0.00321319	remind - SSP2-NPi - 2025	PK	kilowatt hour		technosphere	0.00289465	electricity, medium voltage
market for electricity, medium voltage	0.000164746	remind - SSP2-NPi - 2025	AM	kilowatt hour		technosphere	0.000148414	electricity, medium voltage
market for electricity, medium voltage	0.000548481	remind - SSP2-NPi - 2025	AZ	kilowatt hour		technosphere	0.000494107	electricity, medium voltage
market for electricity, medium voltage	0.00672444	remind - SSP2-NPi - 2025	TR	kilowatt hour		technosphere	0.00605781	electricity, medium voltage
market for electricity, medium voltage	0.00180017	remind - SSP2-NPi - 2025	BD	kilowatt hour		technosphere	0.00162171	electricity, medium voltage
market for electricity, medium voltage	0.000378521	remind - SSP2-NPi - 2025	SY	kilowatt hour		technosphere	0.000340996	electricity, medium voltage
market for electricity, medium voltage	0.000464096	remind - SSP2-NPi - 2025	BH	kilowatt hour		technosphere	0.000418088	electricity, medium voltage
market for electricity, medium voltage	0.000375773	remind - SSP2-NPi - 2025	LK	kilowatt hour		technosphere	0.000338521	electricity, medium voltage
market for electricity, medium voltage	0.000422106	remind - SSP2-NPi - 2025	JO	kilowatt hour		technosphere	0.000380261	electricity, medium voltage
market for electricity, medium voltage	0.0220102	remind - SSP2-NPi - 2025	JP	kilowatt hour		technosphere	0.0198282	electricity, medium voltage
market for electricity, medium voltage	0.000334035	remind - SSP2-NPi - 2025	KP	kilowatt hour		technosphere	0.000300921	electricity, medium voltage
market for electricity, medium voltage	9.7004e-05	remind - SSP2-NPi - 2025	BN	kilowatt hour		technosphere	8.73875e-05	electricity, medium voltage
market for electricity, medium voltage	0.000209182	remind - SSP2-NPi - 2025	MN	kilowatt hour		technosphere	0.000188444	electricity, medium voltage
market for electricity, medium voltage	0.000927007	remind - SSP2-NPi - 2025	OM	kilowatt hour		technosphere	0.000835108	electricity, medium voltage
market for electricity, medium voltage	0.00255754	remind - SSP2-NPi - 2025	KZ	kilowatt hour		technosphere	0.00230399	electricity, medium voltage
market for electricity, medium voltage	0.00125169	remind - SSP2-NPi - 2025	HK	kilowatt hour		technosphere	0.00112761	electricity, medium voltage
market for electricity, medium voltage	0.000191579	remind - SSP2-NPi - 2025	NP	kilowatt hour		technosphere	0.000172587	electricity, medium voltage
market for electricity, medium voltage	0.00563144	remind - SSP2-NPi - 2025	AU	kilowatt hour		technosphere	0.00507316	electricity, medium voltage
market for electricity, medium voltage	0.00412886	remind - SSP2-NPi - 2025	MY	kilowatt hour		technosphere	0.00371954	electricity, medium voltage
market for electrode, negative, Ni	0.000367128	remind - SSP2-NPi - 2025	GLO	kilogram		technosphere	0.000367128	electrode, negative, Ni
market for ethylene glycol	2.22266e-08	remind - SSP2-NPi - 2025	GLO	kilogram		technosphere	2.22266e-08	ethylene glycol
market for ferrochromium, high-carbon, 68% Cr	0	remind - SSP2-NPi - 2025	GLO	kilogram		technosphere	0	ferrochromium, high-carbon, 68% Cr
market for ferromanganese, high-coal, 74.5% Mn	0	remind - SSP2-NPi - 2025	GLO	kilogram		technosphere	0	ferromanganese, high-coal, 74.5% Mn
market for ferrosilicon	0	remind - SSP2-NPi - 2025	GLO	kilogram		technosphere	0	ferrosilicon
market for fluorspar, 97% purity	1.5411e-05	remind - SSP2-NPi - 2025	GLO	kilogram		technosphere	1.5411e-05	fluorspar, 97% purity
market for hard coal	0.00721441	remind - SSP2-NPi - 2025	RoW	kilogram		technosphere	0.00649921	hard coal
market for heat, district or industrial, natural gas	0.0114557	remind - SSP2-NPi - 2025	RoW	megajoule		technosphere	0.01032	heat, district or industrial, natural gas
market for heat, district or industrial, other than natural gas	0.00323011	remind - SSP2-NPi - 2025	RoW	megajoule		technosphere	0.0029099	heat, district or industrial, other than natural gas
market for heavy fuel oil	0.000125876	remind - SSP2-NPi - 2025	RoW	kilogram		technosphere	0.000113397	heavy fuel oil
market for hot rolling, steel	1	remind - SSP2-NPi - 2025	GLO	kilogram		technosphere	1	hot rolling, steel
market for hydrochloric acid, without water, in 30% solution state	1.23711e-05	remind - SSP2-NPi - 2025	RoW	kilogram		technosphere	1.23711e-05	hydrochloric acid, without water, in 30% solution state
market for inert waste	-0.000696008	remind - SSP2-NPi - 2025	RoW	kilogram		technosphere	-0.000696008	inert waste
market for inert waste, for final disposal	-0.00734125	remind - SSP2-NPi - 2025	RoW	kilogram		technosphere	-0.00734125	inert waste, for final disposal
market for iron scrap, sorted, pressed	0	remind - SSP2-NPi - 2025	RoW	kilogram		technosphere	0	iron scrap, sorted, pressed
market for iron scrap, unsorted	0	remind - SSP2-NPi - 2025	GLO	kilogram		technosphere	0	iron scrap, unsorted
market for lime	0.0132342	remind - SSP2-NPi - 2025	RoW	kilogram		technosphere	0.0132342	lime
market for liquefied petroleum gas	0.000214812	remind - SSP2-NPi - 2025	RoW	kilogram		technosphere	0.000193516	liquefied petroleum gas
market for lubricating oil	0.021116	remind - SSP2-NPi - 2025	RoW	kilogram		technosphere	0.0190226	lubricating oil
market for molybdenum trioxide	0	remind - SSP2-NPi - 2025	GLO	kilogram		technosphere	0	molybdenum trioxide
market for natural gas, high pressure	0.00649376	remind - SSP2-NPi - 2025	RoW	cubic meter		technosphere	0.00585	natural gas, high pressure
market for nickel, class 1	0	remind - SSP2-NPi - 2025	GLO	kilogram		technosphere	0	nickel, class 1
market for nitrogen, liquid	0.0120712	remind - SSP2-NPi - 2025	RoW	kilogram		technosphere	0.0120712	nitrogen, liquid
market for oxygen, liquid	0.0359034	remind - SSP2-NPi - 2025	World	kilogram		technosphere	0.0359034	oxygen, liquid
market for pig iron	0	remind - SSP2-NPi - 2025	World	kilogram		technosphere	0	pig iron
market for propane, burned in building machine	1.29106e-05	remind - SSP2-NPi - 2025	GLO	megajoule		technosphere	1.29106e-05	propane, burned in building machine
market for quicklime, in pieces, loose	0.0413549	remind - SSP2-NPi - 2025	RoW	kilogram		technosphere	0.0413549	quicklime, in pieces, loose
market for refractory, basic, packed	0.0145136	remind - SSP2-NPi - 2025	GLO	kilogram		technosphere	0.0145136	refractory, basic, packed
market for silica sand	2.11069e-05	remind - SSP2-NPi - 2025	GLO	kilogram		technosphere	2.11069e-05	silica sand
market for spent solvent mixture	-2.22266e-08	remind - SSP2-NPi - 2025	RoW	kilogram		technosphere	-2.22266e-08	spent solvent mixture
market for sponge iron	0	remind - SSP2-NPi - 2025	GLO	kilogram		technosphere	0	sponge iron
market for sulfur dioxide, liquid	8.61273e-06	remind - SSP2-NPi - 2025	RoW	kilogram		technosphere	8.61273e-06	sulfur dioxide, liquid
market for sulfuric acid	6.75775e-06	remind - SSP2-NPi - 2025	RoW	kilogram		technosphere	6.75775e-06	sulfuric acid
market for wastewater from pig iron production	-0.028223	remind - SSP2-NPi - 2025	RoW	cubic meter		technosphere	-0.028223	wastewater from pig iron production
market group for electricity, high voltage	0.000191016	remind - SSP2-NPi - 2025	Canada without Quebec	kilowatt hour		technosphere	0.000172079	electricity, high voltage
market group for electricity, high voltage	0.00040867	remind - SSP2-NPi - 2025	RAF	kilowatt hour		technosphere	0.000368156	electricity, high voltage
market group for electricity, high voltage	0.000815925	remind - SSP2-NPi - 2025	RLA	kilowatt hour		technosphere	0.000735038	electricity, high voltage
market group for electricity, high voltage	0.000460268	remind - SSP2-NPi - 2025	RME	kilowatt hour		technosphere	0.000414639	electricity, high voltage
market group for electricity, high voltage	0.00427049	remind - SSP2-NPi - 2025	CN	kilowatt hour		technosphere	0.00384713	electricity, high voltage
market group for electricity, high voltage	0.00227711	remind - SSP2-NPi - 2025	US	kilowatt hour		technosphere	0.00205136	electricity, high voltage
market group for electricity, low voltage	1.17905e-05	remind - SSP2-NPi - 2025	RLA	kilowatt hour		technosphere	1.06217e-05	electricity, low voltage
market group for electricity, low voltage	6.55855e-05	remind - SSP2-NPi - 2025	CN	kilowatt hour		technosphere	5.90837e-05	electricity, low voltage
market group for electricity, low voltage	6.83821e-06	remind - SSP2-NPi - 2025	RME	kilowatt hour		technosphere	6.1603e-06	electricity, low voltage
market group for electricity, low voltage	3.58941e-05	remind - SSP2-NPi - 2025	US	kilowatt hour		technosphere	3.23357e-05	electricity, low voltage
market group for electricity, low voltage	2.95392e-06	remind - SSP2-NPi - 2025	Canada without Quebec	kilowatt hour		technosphere	2.66109e-06	electricity, low voltage
market group for electricity, low voltage	5.94949e-06	remind - SSP2-NPi - 2025	RAF	kilowatt hour		technosphere	5.35969e-06	electricity, low voltage
market group for electricity, medium voltage	0.021019	remind - SSP2-NPi - 2025	RME	kilowatt hour		technosphere	0.0189353	electricity, medium voltage
market group for electricity, medium voltage	0.0370612	remind - SSP2-NPi - 2025	RLA	kilowatt hour		technosphere	0.0333871	electricity, medium voltage
market group for electricity, medium voltage	0.105089	remind - SSP2-NPi - 2025	US	kilowatt hour		technosphere	0.0946714	electricity, medium voltage
market group for electricity, medium voltage	0.196582	remind - SSP2-NPi - 2025	CN	kilowatt hour		technosphere	0.177094	electricity, medium voltage
market group for electricity, medium voltage	0.0185997	remind - SSP2-NPi - 2025	RAF	kilowatt hour		technosphere	0.0167558	electricity, medium voltage
market group for electricity, medium voltage	0.00879503	remind - SSP2-NPi - 2025	Canada without Quebec	kilowatt hour		technosphere	0.00792313	electricity, medium voltage
preperation for recycling, steel scrap, from fossil infrastructure, 2025	1.18008	steel_prod_SSP2-NPi	GLO	kilogram		technosphere	1.18008	steel scrap, from fossil infrastructure
treatment of electric arc furnace dust, residual material landfill, optimistic, 2025	-0.0280052	steel_prod_SSP2-NPi	RoW	kilogram		technosphere	-0.0280052	electric arc furnace dust
treatment of electric arc furnace slag, residual material landfill, optimistic, 2025	-0.105263	steel_prod_SSP2-NPi	GLO	kilogram		technosphere	-0.105263	electric arc furnace slag
Activity	steel production, electric, reinforcing steel, pessimistic, 2025
code	686f8bc79d134a219331a2e1827023a9
comment	This dataset has been modified by `premise`, according to the performance for steel production indicated by the IAM model REMIND for the IAM region World in 2100, following the scenario SSP1-NDC. The energy efficiency of the process has been improved by 10%.This activity represents the production of secondary low-alloyed steel in an electric arc furnace (EAF). The process comprises the following …
location	World
reference product	reinforcing steel
scenario	SSP2-NPi
type	process
unit	kilogram
worksheet name	steel_prod_SSP2-NPi
year	2025
Exchanges
name	amount	database	location	unit	categories	type	default_amount	reference product
Antimony ion	4.20301e-10			kilogram	air	biosphere
Argon-40	1.55606e-05			kilogram	air	biosphere
Arsenic ion	4.75423e-10			kilogram	air	biosphere
Benzene	8.48637e-07			kilogram	air	biosphere
Benzene, hexachloro-	6.42293e-09			kilogram	air	biosphere
Cadmium II	1.91118e-08			kilogram	air	biosphere
Cadmium II	1.21518e-09			kilogram	air::urban air close to ground	biosphere
Cadmium II	1.62024e-11			kilogram	water	biosphere
Carbon dioxide, fossil	0.0448951			kilogram	air	biosphere
Carbon dioxide, fossil	0.00494661			kilogram	air::urban air close to ground	biosphere
Carbon dioxide, non-fossil	9.82157e-05			kilogram	air	biosphere
Carbon monoxide, fossil	0.000926546			kilogram	air	biosphere
Carbon monoxide, fossil	4.1135e-05			kilogram	air::urban air close to ground	biosphere
Chloride	7.17664e-05			kilogram	water	biosphere
Chromium III	2.97044e-09			kilogram	air::urban air close to ground	biosphere
Chromium III	4.7308e-07			kilogram	air	biosphere
Chromium VI	7.55436e-08			kilogram	water	biosphere
Chromium VI	2.48047e-10			kilogram	air	biosphere
Cobalt II	2.80201e-10			kilogram	air	biosphere
Copper ion	4.18562e-09			kilogram	air::urban air close to ground	biosphere
Copper ion	7.96923e-09			kilogram	water	biosphere
Copper ion	1.10953e-07			kilogram	air	biosphere
Dioxins, measured as 2,3,7,8-tetrachlorodibenzo-p-dioxin	1.56301e-12			kilogram	air	biosphere
Dioxins, measured as 2,3,7,8-tetrachlorodibenzo-p-dioxin	5.4008e-15			kilogram	air::urban air close to ground	biosphere
Hydrocarbons, aromatic	6.88555e-05			kilogram	air	biosphere
Hydrochloric acid	4.71748e-06			kilogram	air	biosphere
Hydrochloric acid	5.71134e-08			kilogram	air::urban air close to ground	biosphere
Hydrogen fluoride	6.6877e-07			kilogram	air	biosphere
Lead II	1.62024e-09			kilogram	water	biosphere
Lead II	7.97328e-07			kilogram	air	biosphere
Lead II	4.92823e-08			kilogram	air::urban air close to ground	biosphere
Manganese II	7.00502e-10			kilogram	air	biosphere
Mercury II	7.96618e-09			kilogram	air::urban air close to ground	biosphere
Mercury II	6.24269e-07			kilogram	air	biosphere
Mercury II	3.24048e-11			kilogram	water	biosphere
Methane, fossil	2.03852e-06			kilogram	air::urban air close to ground	biosphere
NMVOC, non-methane volatile organic compounds	2.03853e-06			kilogram	air::urban air close to ground	biosphere
Nickel II	2.43483e-07			kilogram	air	biosphere
Nickel II	2.7004e-10			kilogram	air::urban air close to ground	biosphere
Nickel II	3.30869e-10			kilogram	water	biosphere
Nitrogen oxides	7.31565e-06			kilogram	air::urban air close to ground	biosphere
Nitrogen oxides	0.000101937			kilogram	air	biosphere
PAH, polycyclic aromatic hydrocarbons	6.79146e-08			kilogram	air	biosphere
PAH, polycyclic aromatic hydrocarbons	1.14767e-08			kilogram	air::urban air close to ground	biosphere
Particulate Matter, < 2.5 um	5.62815e-05			kilogram	air	biosphere
Particulate Matter, < 2.5 um	7.12244e-07			kilogram	air::urban air close to ground	biosphere
Particulate Matter, > 10 um	2.5138e-07			kilogram	air::urban air close to ground	biosphere
Particulate Matter, > 10 um	1.9494e-05			kilogram	air	biosphere
Particulate Matter, > 2.5 um and < 10um	5.6355e-05			kilogram	air	biosphere
Particulate Matter, > 2.5 um and < 10um	7.12244e-07			kilogram	air::urban air close to ground	biosphere
Phosphorus	1.97059e-11			kilogram	water	biosphere
Polychlorinated biphenyls	6.49506e-09			kilogram	air	biosphere
Polychlorinated biphenyls	7.4261e-11			kilogram	air::urban air close to ground	biosphere
Selenium IV	2.80201e-10			kilogram	air	biosphere
Sulfate	5.12171e-08			kilogram	water	biosphere
Sulfur dioxide	1.90243e-07			kilogram	air::urban air close to ground	biosphere
Sulfur dioxide	5.20581e-05			kilogram	air	biosphere
Tellurium	5.62699e-10			kilogram	air	biosphere
Tin ion	7.00502e-10			kilogram	air	biosphere
Titanium ion	2.80201e-10			kilogram	air	biosphere
Vanadium V	7.00502e-10			kilogram	air	biosphere
Water	0.00147176			cubic meter	water	biosphere
Water	7.22231e-05			cubic meter	air::urban air close to ground	biosphere
Water	0.00887165			cubic meter	air	biosphere
Water, cooling, unspecified natural origin	0.00417675			cubic meter	natural resource::in water	biosphere
Water, unspecified natural origin	0.0352786			cubic meter	natural resource::in ground	biosphere
Zinc II	7.24922e-07			kilogram	air::urban air close to ground	biosphere
Zinc II	7.84638e-06			kilogram	air	biosphere
Zinc II	2.66075e-08			kilogram	water	biosphere
steel production, electric, reinforcing steel, pessimistic, 2025	1	steel_prod_SSP2-NPi	World	kilogram		production	1	reinforcing steel
electric arc furnace slag, for recovery, Recycled Content cut-off	-0.00399409	remind - SSP2-NPi - 2025	GLO	kilogram		technosphere	-0.00399409	electric arc furnace slag, for recovery
market for aluminium, cast alloy	0.000108691	remind - SSP2-NPi - 2025	GLO	kilogram		technosphere	0.000108691	aluminium, cast alloy
market for aluminium, primary, ingot	4.36378e-07	remind - SSP2-NPi - 2025	RoW	kilogram		technosphere	4.36378e-07	aluminium, primary, ingot
market for aluminium, wrought alloy	0.000108068	remind - SSP2-NPi - 2025	GLO	kilogram		technosphere	0.000108068	aluminium, wrought alloy
market for anode, for metal electrolysis	0.00234417	remind - SSP2-NPi - 2025	GLO	kilogram		technosphere	0.00234417	anode, for metal electrolysis
market for argon, liquid	0.000690895	remind - SSP2-NPi - 2025	RoW	kilogram		technosphere	0.000690895	argon, liquid
market for calcium carbide, technical grade	3.16949e-06	remind - SSP2-NPi - 2025	RoW	kilogram		technosphere	3.16949e-06	calcium carbide, technical grade
market for cast iron	3.44512e-05	remind - SSP2-NPi - 2025	GLO	kilogram		technosphere	3.44512e-05	cast iron
market for chemical, inorganic	1.82263e-06	remind - SSP2-NPi - 2025	GLO	kilogram		technosphere	1.82263e-06	chemical, inorganic
market for coke	0.00332933	remind - SSP2-NPi - 2025	GLO	megajoule		technosphere	0.00299928	coke
market for diesel, burned in building machine	1.62016e-05	remind - SSP2-NPi - 2025	World	megajoule		technosphere	1.45954e-05	diesel, burned in building machine
market for dolomite	0.0120311	remind - SSP2-NPi - 2025	RoW	kilogram		technosphere	0.0120311	dolomite
market for electric arc furnace converter	4.02495e-11	remind - SSP2-NPi - 2025	GLO	unit		technosphere	4.02495e-11	electric arc furnace converter
market for electric arc furnace dust	0	remind - SSP2-NPi - 2025	RoW	kilogram		technosphere	0	electric arc furnace dust
market for electric arc furnace secondary metallurgy slag	0	remind - SSP2-NPi - 2025	RoW	kilogram		technosphere	0	electric arc furnace secondary metallurgy slag
market for electric arc furnace slag	0	remind - SSP2-NPi - 2025	RoW	kilogram		technosphere	0	electric arc furnace slag
market for electricity, high voltage	7.34725e-06	remind - SSP2-NPi - 2025	KP	kilowatt hour		technosphere	6.61888e-06	electricity, high voltage
market for electricity, high voltage	0.000471592	remind - SSP2-NPi - 2025	JP	kilowatt hour		technosphere	0.000424841	electricity, high voltage
market for electricity, high voltage	2.02352e-05	remind - SSP2-NPi - 2025	OM	kilowatt hour		technosphere	1.82291e-05	electricity, high voltage
market for electricity, high voltage	0.000122632	remind - SSP2-NPi - 2025	AU	kilowatt hour		technosphere	0.000110475	electricity, high voltage
market for electricity, high voltage	5.58122e-05	remind - SSP2-NPi - 2025	KZ	kilowatt hour		technosphere	5.02792e-05	electricity, high voltage
market for electricity, high voltage	2.40065e-05	remind - SSP2-NPi - 2025	NZ	kilowatt hour		technosphere	2.16266e-05	electricity, high voltage
market for electricity, high voltage	2.71236e-05	remind - SSP2-NPi - 2025	HK	kilowatt hour		technosphere	2.44347e-05	electricity, high voltage
market for electricity, high voltage	8.19579e-06	remind - SSP2-NPi - 2025	KG	kilowatt hour		technosphere	7.3833e-06	electricity, high voltage
market for electricity, high voltage	1.00383e-05	remind - SSP2-NPi - 2025	BH	kilowatt hour		technosphere	9.04311e-06	electricity, high voltage
market for electricity, high voltage	2.69959e-06	remind - SSP2-NPi - 2025	CY	kilowatt hour		technosphere	2.43196e-06	electricity, high voltage
market for electricity, high voltage	8.9857e-05	remind - SSP2-NPi - 2025	MY	kilowatt hour		technosphere	8.0949e-05	electricity, high voltage
market for electricity, high voltage	4.20953e-06	remind - SSP2-NPi - 2025	NP	kilowatt hour		technosphere	3.79222e-06	electricity, high voltage
market for electricity, high voltage	0.000100529	remind - SSP2-NPi - 2025	ID	kilowatt hour		technosphere	9.05628e-05	electricity, high voltage
market for electricity, high voltage	1.1965e-05	remind - SSP2-NPi - 2025	AZ	kilowatt hour		technosphere	1.07788e-05	electricity, high voltage
market for electricity, high voltage	2.11845e-06	remind - SSP2-NPi - 2025	BN	kilowatt hour		technosphere	1.90844e-06	electricity, high voltage
market for electricity, high voltage	0.000122282	remind - SSP2-NPi - 2025	VN	kilowatt hour		technosphere	0.000110159	electricity, high voltage
market for electricity, high voltage	6.3224e-05	remind - SSP2-NPi - 2025	TH	kilowatt hour		technosphere	5.69563e-05	electricity, high voltage
market for electricity, high voltage	5.55282e-05	remind - SSP2-NPi - 2025	PH	kilowatt hour		technosphere	5.00234e-05	electricity, high voltage
market for electricity, high voltage	1.036e-06	remind - SSP2-NPi - 2025	QA	kilowatt hour		technosphere	9.33293e-07	electricity, high voltage
market for electricity, high voltage	6.3958e-06	remind - SSP2-NPi - 2025	KH	kilowatt hour		technosphere	5.76175e-06	electricity, high voltage
market for electricity, high voltage	9.76436e-06	remind - SSP2-NPi - 2025	TJ	kilowatt hour		technosphere	8.79637e-06	electricity, high voltage
market for electricity, high voltage	7.04425e-05	remind - SSP2-NPi - 2025	PK	kilowatt hour		technosphere	6.34591e-05	electricity, high voltage
market for electricity, high voltage	3.27437e-05	remind - SSP2-NPi - 2025	IL	kilowatt hour		technosphere	2.94977e-05	electricity, high voltage
market for electricity, high voltage	9.85571e-06	remind - SSP2-NPi - 2025	TM	kilowatt hour		technosphere	8.87866e-06	electricity, high voltage
market for electricity, high voltage	1.23145e-05	remind - SSP2-NPi - 2025	MM	kilowatt hour		technosphere	1.10937e-05	electricity, high voltage
market for electricity, high voltage	2.50564e-05	remind - SSP2-NPi - 2025	SG	kilowatt hour		technosphere	2.25724e-05	electricity, high voltage
market for electricity, high voltage	0.000298233	remind - SSP2-NPi - 2025	KR	kilowatt hour		technosphere	0.000268667	electricity, high voltage
market for electricity, high voltage	0.000126018	remind - SSP2-NPi - 2025	TW	kilowatt hour		technosphere	0.000113525	electricity, high voltage
market for electricity, high voltage	6.43726e-06	remind - SSP2-NPi - 2025	GE	kilowatt hour		technosphere	5.7991e-06	electricity, high voltage
market for electricity, high voltage	7.82947e-06	remind - SSP2-NPi - 2025	LB	kilowatt hour		technosphere	7.0533e-06	electricity, high voltage
market for electricity, high voltage	3.93291e-05	remind - SSP2-NPi - 2025	BD	kilowatt hour		technosphere	3.54302e-05	electricity, high voltage
market for electricity, high voltage	1.40788e-06	remind - SSP2-NPi - 2025	YE	kilowatt hour		technosphere	1.26831e-06	electricity, high voltage
market for electricity, high voltage	8.19102e-06	remind - SSP2-NPi - 2025	LK	kilowatt hour		technosphere	7.379e-06	electricity, high voltage
market for electricity, high voltage	8.38672e-06	remind - SSP2-NPi - 2025	SY	kilowatt hour		technosphere	7.5553e-06	electricity, high voltage
market for electricity, high voltage	3.59154e-06	remind - SSP2-NPi - 2025	AM	kilowatt hour		technosphere	3.23549e-06	electricity, high voltage
market for electricity, high voltage	3.47041e-05	remind - SSP2-NPi - 2025	UZ	kilowatt hour		technosphere	3.12637e-05	electricity, high voltage
market for electricity, high voltage	9.29135e-06	remind - SSP2-NPi - 2025	JO	kilowatt hour		technosphere	8.37025e-06	electricity, high voltage
market for electricity, high voltage	0.000147174	remind - SSP2-NPi - 2025	TR	kilowatt hour		technosphere	0.000132584	electricity, high voltage
market for electricity, high voltage	4.57147e-06	remind - SSP2-NPi - 2025	MN	kilowatt hour		technosphere	4.11828e-06	electricity, high voltage
market for electricity, low voltage	1.54936e-07	remind - SSP2-NPi - 2025	JO	kilowatt hour		technosphere	1.39576e-07	electricity, low voltage
market for electricity, low voltage	3.15726e-08	remind - SSP2-NPi - 2025	BN	kilowatt hour		technosphere	2.84426e-08	electricity, low voltage
market for electricity, low voltage	8.44093e-07	remind - SSP2-NPi - 2025	KZ	kilowatt hour		technosphere	7.60414e-07	electricity, low voltage
market for electricity, low voltage	1.90869e-06	remind - SSP2-NPi - 2025	VN	kilowatt hour		technosphere	1.71947e-06	electricity, low voltage
market for electricity, low voltage	1.59172e-08	remind - SSP2-NPi - 2025	QA	kilowatt hour		technosphere	1.43392e-08	electricity, low voltage
market for electricity, low voltage	8.02443e-06	remind - SSP2-NPi - 2025	JP	kilowatt hour		technosphere	7.22893e-06	electricity, low voltage
market for electricity, low voltage	5.36768e-07	remind - SSP2-NPi - 2025	IL	kilowatt hour		technosphere	4.83556e-07	electricity, low voltage
market for electricity, low voltage	4.22588e-07	remind - SSP2-NPi - 2025	HK	kilowatt hour		technosphere	3.80695e-07	electricity, low voltage
market for electricity, low voltage	1.37609e-06	remind - SSP2-NPi - 2025	MY	kilowatt hour		technosphere	1.23967e-06	electricity, low voltage
market for electricity, low voltage	1.51604e-06	remind - SSP2-NPi - 2025	ID	kilowatt hour		technosphere	1.36575e-06	electricity, low voltage
market for electricity, low voltage	1.41457e-07	remind - SSP2-NPi - 2025	TM	kilowatt hour		technosphere	1.27433e-07	electricity, low voltage
market for electricity, low voltage	2.02039e-06	remind - SSP2-NPi - 2025	AU	kilowatt hour		technosphere	1.8201e-06	electricity, low voltage
market for electricity, low voltage	4.39189e-08	remind - SSP2-NPi - 2025	CY	kilowatt hour		technosphere	3.9565e-08	electricity, low voltage
market for electricity, low voltage	9.61134e-08	remind - SSP2-NPi - 2025	KH	kilowatt hour		technosphere	8.65851e-08	electricity, low voltage
market for electricity, low voltage	1.41695e-07	remind - SSP2-NPi - 2025	TJ	kilowatt hour		technosphere	1.27648e-07	electricity, low voltage
market for electricity, low voltage	1.1629e-07	remind - SSP2-NPi - 2025	KG	kilowatt hour		technosphere	1.04761e-07	electricity, low voltage
market for electricity, low voltage	1.24482e-07	remind - SSP2-NPi - 2025	LK	kilowatt hour		technosphere	1.12142e-07	electricity, low voltage
market for electricity, low voltage	8.41681e-07	remind - SSP2-NPi - 2025	PH	kilowatt hour		technosphere	7.5824e-07	electricity, low voltage
market for electricity, low voltage	5.27228e-07	remind - SSP2-NPi - 2025	UZ	kilowatt hour		technosphere	4.74961e-07	electricity, low voltage
market for electricity, low voltage	1.05056e-07	remind - SSP2-NPi - 2025	KP	kilowatt hour		technosphere	9.46409e-08	electricity, low voltage
market for electricity, low voltage	1.79862e-07	remind - SSP2-NPi - 2025	AZ	kilowatt hour		technosphere	1.62031e-07	electricity, low voltage
market for electricity, low voltage	2.00037e-06	remind - SSP2-NPi - 2025	TW	kilowatt hour		technosphere	1.80206e-06	electricity, low voltage
market for electricity, low voltage	3.67417e-07	remind - SSP2-NPi - 2025	NZ	kilowatt hour		technosphere	3.30993e-07	electricity, low voltage
market for electricity, low voltage	1.005e-06	remind - SSP2-NPi - 2025	TH	kilowatt hour		technosphere	9.05372e-07	electricity, low voltage
market for electricity, low voltage	4.10046e-07	remind - SSP2-NPi - 2025	SG	kilowatt hour		technosphere	3.69396e-07	electricity, low voltage
market for electricity, low voltage	1.77765e-07	remind - SSP2-NPi - 2025	MM	kilowatt hour		technosphere	1.60142e-07	electricity, low voltage
market for electricity, low voltage	2.30185e-08	remind - SSP2-NPi - 2025	YE	kilowatt hour		technosphere	2.07366e-08	electricity, low voltage
market for electricity, low voltage	5.47171e-08	remind - SSP2-NPi - 2025	AM	kilowatt hour		technosphere	4.92927e-08	electricity, low voltage
market for electricity, low voltage	9.72895e-08	remind - SSP2-NPi - 2025	GE	kilowatt hour		technosphere	8.76447e-08	electricity, low voltage
market for electricity, low voltage	1.17261e-07	remind - SSP2-NPi - 2025	LB	kilowatt hour		technosphere	1.05637e-07	electricity, low voltage
market for electricity, low voltage	5.88548e-07	remind - SSP2-NPi - 2025	BD	kilowatt hour		technosphere	5.30202e-07	electricity, low voltage
market for electricity, low voltage	4.76373e-06	remind - SSP2-NPi - 2025	KR	kilowatt hour		technosphere	4.29148e-06	electricity, low voltage
market for electricity, low voltage	1.03288e-06	remind - SSP2-NPi - 2025	PK	kilowatt hour		technosphere	9.30483e-07	electricity, low voltage
market for electricity, low voltage	1.14434e-07	remind - SSP2-NPi - 2025	SY	kilowatt hour		technosphere	1.03089e-07	electricity, low voltage
market for electricity, low voltage	2.26588e-06	remind - SSP2-NPi - 2025	TR	kilowatt hour		technosphere	2.04125e-06	electricity, low voltage
market for electricity, low voltage	1.57994e-07	remind - SSP2-NPi - 2025	BH	kilowatt hour		technosphere	1.42331e-07	electricity, low voltage
market for electricity, low voltage	6.87043e-08	remind - SSP2-NPi - 2025	MN	kilowatt hour		technosphere	6.18933e-08	electricity, low voltage
market for electricity, low voltage	3.02294e-07	remind - SSP2-NPi - 2025	OM	kilowatt hour		technosphere	2.72326e-07	electricity, low voltage
market for electricity, low voltage	6.04712e-08	remind - SSP2-NPi - 2025	NP	kilowatt hour		technosphere	5.44763e-08	electricity, low voltage
market for electricity, medium voltage	0.00561731	remind - SSP2-NPi - 2025	VN	kilowatt hour		technosphere	0.00506043	electricity, medium voltage
market for electricity, medium voltage	0.000124302	remind - SSP2-NPi - 2025	CY	kilowatt hour		technosphere	0.000111979	electricity, medium voltage
market for electricity, medium voltage	0.0015945	remind - SSP2-NPi - 2025	UZ	kilowatt hour		technosphere	0.00143643	electricity, medium voltage
market for electricity, medium voltage	0.000445141	remind - SSP2-NPi - 2025	TJ	kilowatt hour		technosphere	0.000401012	electricity, medium voltage
market for electricity, medium voltage	0.0046123	remind - SSP2-NPi - 2025	ID	kilowatt hour		technosphere	0.00415506	electricity, medium voltage
market for electricity, medium voltage	0.000372246	remind - SSP2-NPi - 2025	KG	kilowatt hour		technosphere	0.000335343	electricity, medium voltage
market for electricity, medium voltage	0.00289857	remind - SSP2-NPi - 2025	TH	kilowatt hour		technosphere	0.00261121	electricity, medium voltage
market for electricity, medium voltage	0.00254362	remind - SSP2-NPi - 2025	PH	kilowatt hour		technosphere	0.00229146	electricity, medium voltage
market for electricity, medium voltage	4.76931e-05	remind - SSP2-NPi - 2025	QA	kilowatt hour		technosphere	4.2965e-05	electricity, medium voltage
market for electricity, medium voltage	0.000292769	remind - SSP2-NPi - 2025	KH	kilowatt hour		technosphere	0.000263745	electricity, medium voltage
market for electricity, medium voltage	0.00118873	remind - SSP2-NPi - 2025	SG	kilowatt hour		technosphere	0.00107089	electricity, medium voltage
market for electricity, medium voltage	0.0137499	remind - SSP2-NPi - 2025	KR	kilowatt hour		technosphere	0.0123868	electricity, medium voltage
market for electricity, medium voltage	0.00581369	remind - SSP2-NPi - 2025	TW	kilowatt hour		technosphere	0.00523735	electricity, medium voltage
market for electricity, medium voltage	0.00110368	remind - SSP2-NPi - 2025	NZ	kilowatt hour		technosphere	0.000994268	electricity, medium voltage
market for electricity, medium voltage	0.000295498	remind - SSP2-NPi - 2025	GE	kilowatt hour		technosphere	0.000266204	electricity, medium voltage
market for electricity, medium voltage	0.000358333	remind - SSP2-NPi - 2025	LB	kilowatt hour		technosphere	0.00032281	electricity, medium voltage
market for electricity, medium voltage	0.00150609	remind - SSP2-NPi - 2025	IL	kilowatt hour		technosphere	0.00135678	electricity, medium voltage
market for electricity, medium voltage	0.000448485	remind - SSP2-NPi - 2025	TM	kilowatt hour		technosphere	0.000404024	electricity, medium voltage
market for electricity, medium voltage	0.000560672	remind - SSP2-NPi - 2025	MM	kilowatt hour		technosphere	0.00050509	electricity, medium voltage
market for electricity, medium voltage	6.27497e-05	remind - SSP2-NPi - 2025	YE	kilowatt hour		technosphere	5.6529e-05	electricity, medium voltage
market for electricity, medium voltage	0.00321319	remind - SSP2-NPi - 2025	PK	kilowatt hour		technosphere	0.00289465	electricity, medium voltage
market for electricity, medium voltage	0.000164746	remind - SSP2-NPi - 2025	AM	kilowatt hour		technosphere	0.000148414	electricity, medium voltage
market for electricity, medium voltage	0.000548481	remind - SSP2-NPi - 2025	AZ	kilowatt hour		technosphere	0.000494107	electricity, medium voltage
market for electricity, medium voltage	0.00672444	remind - SSP2-NPi - 2025	TR	kilowatt hour		technosphere	0.00605781	electricity, medium voltage
market for electricity, medium voltage	0.00180017	remind - SSP2-NPi - 2025	BD	kilowatt hour		technosphere	0.00162171	electricity, medium voltage
market for electricity, medium voltage	0.000378521	remind - SSP2-NPi - 2025	SY	kilowatt hour		technosphere	0.000340996	electricity, medium voltage
market for electricity, medium voltage	0.000464096	remind - SSP2-NPi - 2025	BH	kilowatt hour		technosphere	0.000418088	electricity, medium voltage
market for electricity, medium voltage	0.000375773	remind - SSP2-NPi - 2025	LK	kilowatt hour		technosphere	0.000338521	electricity, medium voltage
market for electricity, medium voltage	0.000422106	remind - SSP2-NPi - 2025	JO	kilowatt hour		technosphere	0.000380261	electricity, medium voltage
market for electricity, medium voltage	0.0220102	remind - SSP2-NPi - 2025	JP	kilowatt hour		technosphere	0.0198282	electricity, medium voltage
market for electricity, medium voltage	0.000334035	remind - SSP2-NPi - 2025	KP	kilowatt hour		technosphere	0.000300921	electricity, medium voltage
market for electricity, medium voltage	9.7004e-05	remind - SSP2-NPi - 2025	BN	kilowatt hour		technosphere	8.73875e-05	electricity, medium voltage
market for electricity, medium voltage	0.000209182	remind - SSP2-NPi - 2025	MN	kilowatt hour		technosphere	0.000188444	electricity, medium voltage
market for electricity, medium voltage	0.000927007	remind - SSP2-NPi - 2025	OM	kilowatt hour		technosphere	0.000835108	electricity, medium voltage
market for electricity, medium voltage	0.00255754	remind - SSP2-NPi - 2025	KZ	kilowatt hour		technosphere	0.00230399	electricity, medium voltage
market for electricity, medium voltage	0.00125169	remind - SSP2-NPi - 2025	HK	kilowatt hour		technosphere	0.00112761	electricity, medium voltage
market for electricity, medium voltage	0.000191579	remind - SSP2-NPi - 2025	NP	kilowatt hour		technosphere	0.000172587	electricity, medium voltage
market for electricity, medium voltage	0.00563144	remind - SSP2-NPi - 2025	AU	kilowatt hour		technosphere	0.00507316	electricity, medium voltage
market for electricity, medium voltage	0.00412886	remind - SSP2-NPi - 2025	MY	kilowatt hour		technosphere	0.00371954	electricity, medium voltage
market for electrode, negative, Ni	0.000367128	remind - SSP2-NPi - 2025	GLO	kilogram		technosphere	0.000367128	electrode, negative, Ni
market for ethylene glycol	2.22266e-08	remind - SSP2-NPi - 2025	GLO	kilogram		technosphere	2.22266e-08	ethylene glycol
market for ferrochromium, high-carbon, 68% Cr	0.000644406	remind - SSP2-NPi - 2025	GLO	kilogram		technosphere	0.000644406	ferrochromium, high-carbon, 68% Cr
market for ferromanganese, high-coal, 74.5% Mn	0.00755982	remind - SSP2-NPi - 2025	GLO	kilogram		technosphere	0.00681038	ferromanganese, high-coal, 74.5% Mn
market for ferrosilicon	0.00654687	remind - SSP2-NPi - 2025	GLO	kilogram		technosphere	0.00654687	ferrosilicon
market for fluorspar, 97% purity	1.5411e-05	remind - SSP2-NPi - 2025	GLO	kilogram		technosphere	1.5411e-05	fluorspar, 97% purity
market for hard coal	0.00721441	remind - SSP2-NPi - 2025	RoW	kilogram		technosphere	0.00649921	hard coal
market for heat, district or industrial, natural gas	0.0114557	remind - SSP2-NPi - 2025	RoW	megajoule		technosphere	0.01032	heat, district or industrial, natural gas
market for heat, district or industrial, other than natural gas	0.00323011	remind - SSP2-NPi - 2025	RoW	megajoule		technosphere	0.0029099	heat, district or industrial, other than natural gas
market for heavy fuel oil	0.000125876	remind - SSP2-NPi - 2025	RoW	kilogram		technosphere	0.000113397	heavy fuel oil
market for hot rolling, steel	1	remind - SSP2-NPi - 2025	GLO	kilogram		technosphere	1	hot rolling, steel
market for hydrochloric acid, without water, in 30% solution state	1.23711e-05	remind - SSP2-NPi - 2025	RoW	kilogram		technosphere	1.23711e-05	hydrochloric acid, without water, in 30% solution state
market for inert waste	-0.000696008	remind - SSP2-NPi - 2025	RoW	kilogram		technosphere	-0.000696008	inert waste
market for inert waste, for final disposal	-0.00734125	remind - SSP2-NPi - 2025	RoW	kilogram		technosphere	-0.00734125	inert waste, for final disposal
market for iron scrap, sorted, pressed	0	remind - SSP2-NPi - 2025	RoW	kilogram		technosphere	0	iron scrap, sorted, pressed
market for iron scrap, unsorted	0	remind - SSP2-NPi - 2025	GLO	kilogram		technosphere	0	iron scrap, unsorted
market for lime	0.0132342	remind - SSP2-NPi - 2025	RoW	kilogram		technosphere	0.0132342	lime
market for liquefied petroleum gas	0.000214812	remind - SSP2-NPi - 2025	RoW	kilogram		technosphere	0.000193516	liquefied petroleum gas
market for lubricating oil	0.021116	remind - SSP2-NPi - 2025	RoW	kilogram		technosphere	0.0190226	lubricating oil
market for molybdenum trioxide	9.45811e-06	remind - SSP2-NPi - 2025	GLO	kilogram		technosphere	9.45811e-06	molybdenum trioxide
market for natural gas, high pressure	0.00649376	remind - SSP2-NPi - 2025	RoW	cubic meter		technosphere	0.00585	natural gas, high pressure
market for nickel, class 1	2.22266e-05	remind - SSP2-NPi - 2025	GLO	kilogram		technosphere	2.22266e-05	nickel, class 1
market for nitrogen, liquid	0.0120712	remind - SSP2-NPi - 2025	RoW	kilogram		technosphere	0.0120712	nitrogen, liquid
market for oxygen, liquid	0.0359034	remind - SSP2-NPi - 2025	World	kilogram		technosphere	0.0359034	oxygen, liquid
market for pig iron	0.1432	remind - SSP2-NPi - 2025	World	kilogram		technosphere	0.1432	pig iron
market for propane, burned in building machine	1.29106e-05	remind - SSP2-NPi - 2025	GLO	megajoule		technosphere	1.29106e-05	propane, burned in building machine
market for quicklime, in pieces, loose	0.0413549	remind - SSP2-NPi - 2025	RoW	kilogram		technosphere	0.0413549	quicklime, in pieces, loose
market for refractory, basic, packed	0.0145136	remind - SSP2-NPi - 2025	GLO	kilogram		technosphere	0.0145136	refractory, basic, packed
market for silica sand	2.11069e-05	remind - SSP2-NPi - 2025	GLO	kilogram		technosphere	2.11069e-05	silica sand
market for spent solvent mixture	-2.22266e-08	remind - SSP2-NPi - 2025	RoW	kilogram		technosphere	-2.22266e-08	spent solvent mixture
market for sponge iron	0.174986	remind - SSP2-NPi - 2025	GLO	kilogram		technosphere	0.174986	sponge iron
market for sulfur dioxide, liquid	8.61273e-06	remind - SSP2-NPi - 2025	RoW	kilogram		technosphere	8.61273e-06	sulfur dioxide, liquid
market for sulfuric acid	6.75775e-06	remind - SSP2-NPi - 2025	RoW	kilogram		technosphere	6.75775e-06	sulfuric acid
market for wastewater from pig iron production	-0.028223	remind - SSP2-NPi - 2025	RoW	cubic meter		technosphere	-0.028223	wastewater from pig iron production
market group for electricity, high voltage	0.000191016	remind - SSP2-NPi - 2025	Canada without Quebec	kilowatt hour		technosphere	0.000172079	electricity, high voltage
market group for electricity, high voltage	0.00040867	remind - SSP2-NPi - 2025	RAF	kilowatt hour		technosphere	0.000368156	electricity, high voltage
market group for electricity, high voltage	0.000815925	remind - SSP2-NPi - 2025	RLA	kilowatt hour		technosphere	0.000735038	electricity, high voltage
market group for electricity, high voltage	0.000460268	remind - SSP2-NPi - 2025	RME	kilowatt hour		technosphere	0.000414639	electricity, high voltage
market group for electricity, high voltage	0.00427049	remind - SSP2-NPi - 2025	CN	kilowatt hour		technosphere	0.00384713	electricity, high voltage
market group for electricity, high voltage	0.00227711	remind - SSP2-NPi - 2025	US	kilowatt hour		technosphere	0.00205136	electricity, high voltage
market group for electricity, low voltage	1.17905e-05	remind - SSP2-NPi - 2025	RLA	kilowatt hour		technosphere	1.06217e-05	electricity, low voltage
market group for electricity, low voltage	6.55855e-05	remind - SSP2-NPi - 2025	CN	kilowatt hour		technosphere	5.90837e-05	electricity, low voltage
market group for electricity, low voltage	6.83821e-06	remind - SSP2-NPi - 2025	RME	kilowatt hour		technosphere	6.1603e-06	electricity, low voltage
market group for electricity, low voltage	3.58941e-05	remind - SSP2-NPi - 2025	US	kilowatt hour		technosphere	3.23357e-05	electricity, low voltage
market group for electricity, low voltage	2.95392e-06	remind - SSP2-NPi - 2025	Canada without Quebec	kilowatt hour		technosphere	2.66109e-06	electricity, low voltage
market group for electricity, low voltage	5.94949e-06	remind - SSP2-NPi - 2025	RAF	kilowatt hour		technosphere	5.35969e-06	electricity, low voltage
market group for electricity, medium voltage	0.021019	remind - SSP2-NPi - 2025	RME	kilowatt hour		technosphere	0.0189353	electricity, medium voltage
market group for electricity, medium voltage	0.0370612	remind - SSP2-NPi - 2025	RLA	kilowatt hour		technosphere	0.0333871	electricity, medium voltage
market group for electricity, medium voltage	0.105089	remind - SSP2-NPi - 2025	US	kilowatt hour		technosphere	0.0946714	electricity, medium voltage
market group for electricity, medium voltage	0.196582	remind - SSP2-NPi - 2025	CN	kilowatt hour		technosphere	0.177094	electricity, medium voltage
market group for electricity, medium voltage	0.0185997	remind - SSP2-NPi - 2025	RAF	kilowatt hour		technosphere	0.0167558	electricity, medium voltage
market group for electricity, medium voltage	0.00879503	remind - SSP2-NPi - 2025	Canada without Quebec	kilowatt hour		technosphere	0.00792313	electricity, medium voltage
preperation for recycling, steel scrap, from fossil infrastructure, 2025	0.847823	steel_prod_SSP2-NPi	GLO	kilogram		technosphere	0.847823	steel scrap, from fossil infrastructure
treatment of electric arc furnace dust, residual material landfill, pessimistic, 2025	-0.0280052	steel_prod_SSP2-NPi	RoW	kilogram		technosphere	-0.0280052	electric arc furnace dust
treatment of electric arc furnace slag, residual material landfill, pessimistic, 2025	-0.105263	steel_prod_SSP2-NPi	GLO	kilogram		technosphere	-0.105263	electric arc furnace slag
Activity	steel production, from primary iron, chromium steel 18/8, optimistic, 2025
code	cff8cb767f914c789f52e3c2cd6079c9
comment	This dataset has been modified by `premise`, according to the performance for steel production indicated by the IAM model REMIND for the IAM region World in 2100, following the scenario SSP1-NDC. The energy efficiency of the process has been improved by 28%.Background: This activity represents the production of stainless steel (Type 304, aka. 18/8; assumed composition 68.6% Fe, 9.3% Ni, 19.0% Cr …
location	World
reference product	steel, chromium steel 18/8
scenario	SSP2-NPi
type	process
unit	kilogram
worksheet name	steel_prod_SSP2-NPi
year	2025
Exchanges
name	amount	database	location	unit	categories	type	default_amount	reference product
Benzene	3.63318e-07			kilogram	air	biosphere
Benzene, hexachloro-	1.54919e-09			kilogram	air	biosphere
Cadmium II	1.21655e-08			kilogram	air	biosphere
Carbon dioxide, fossil	0.033168			kilogram	air	biosphere
Carbon dioxide, non-fossil	9.475e-05			kilogram	air	biosphere
Carbon monoxide, fossil	0.000474342			kilogram	air	biosphere
Chromium III	1.83303e-07			kilogram	air	biosphere
Copper ion	7.48999e-08			kilogram	air	biosphere
Dioxins, measured as 2,3,7,8-tetrachlorodibenzo-p-dioxin	4.89898e-13			kilogram	air	biosphere
Hydrocarbons, aromatic	7.7008e-05			kilogram	air	biosphere
Hydrochloric acid	5.31037e-06			kilogram	air	biosphere
Hydrogen fluoride	2.44949e-08			kilogram	air	biosphere
Lead II	4.62331e-07			kilogram	air	biosphere
Mercury II	2e-08			kilogram	air	biosphere
Nickel II	7.74597e-08			kilogram	air	biosphere
Nitrogen oxides	7.73305e-05			kilogram	air	biosphere
PAH, polycyclic aromatic hydrocarbons	9.34345e-08			kilogram	air	biosphere
Particulate Matter, < 2.5 um	1.47224e-05			kilogram	air	biosphere
Particulate Matter, > 10 um	5.19615e-06			kilogram	air	biosphere
Particulate Matter, > 2.5 um and < 10um	1.47224e-05			kilogram	air	biosphere
Polychlorinated biphenyls	2.23607e-10			kilogram	air	biosphere
Sulfur dioxide	3.24037e-05			kilogram	air	biosphere
Water	0.0022952			cubic meter	water	biosphere
Water	0.00292117			cubic meter	air	biosphere
Water, cooling, unspecified natural origin	0.00654217			cubic meter	natural resource::in water	biosphere
Zinc II	2.19089e-06			kilogram	air	biosphere
steel production, from primary iron, chromium steel 18/8, optimistic, 2025	1	steel_prod_SSP2-NPi	World	kilogram		production	1	steel, chromium steel 18/8
market for anode, for metal electrolysis	0.004	remind - SSP2-NPi - 2025	GLO	kilogram		technosphere	0.004	anode, for metal electrolysis
market for argon, liquid	0.032	remind - SSP2-NPi - 2025	RoW	kilogram		technosphere	0.032	argon, liquid
market for electric arc furnace converter	4e-11	remind - SSP2-NPi - 2025	GLO	unit		technosphere	4e-11	electric arc furnace converter
market for electricity, medium voltage	0.000998198	remind - SSP2-NPi - 2025	NZ	kilowatt hour		technosphere	0.000998198	electricity, medium voltage
market for electricity, medium voltage	0.00509321	remind - SSP2-NPi - 2025	AU	kilowatt hour		technosphere	0.00509321	electricity, medium voltage
market for ferrochromium, high-carbon, 68% Cr	0.26471	remind - SSP2-NPi - 2025	GLO	kilogram		technosphere	0.26471	ferrochromium, high-carbon, 68% Cr
market for ferronickel	0.32	remind - SSP2-NPi - 2025	GLO	kilogram		technosphere	0.32	ferronickel
market for hard coal	0.00691265	remind - SSP2-NPi - 2025	RoW	kilogram		technosphere	0.00691265	hard coal
market for hot rolling, steel	1	remind - SSP2-NPi - 2025	GLO	kilogram		technosphere	1	hot rolling, steel
market for inert waste, for final disposal	-0.00678233	remind - SSP2-NPi - 2025	RoW	kilogram		technosphere	-0.00678233	inert waste, for final disposal
market for natural gas, high pressure	0.00564357	remind - SSP2-NPi - 2025	RoW	cubic meter		technosphere	0.00564357	natural gas, high pressure
market for nitrogen, liquid	0.00359723	remind - SSP2-NPi - 2025	RoW	kilogram		technosphere	0.00359723	nitrogen, liquid
market for oxygen, liquid	0.036	remind - SSP2-NPi - 2025	World	kilogram		technosphere	0.036	oxygen, liquid
market for pig iron	0.55079	remind - SSP2-NPi - 2025	World	kilogram		technosphere	0.55079	pig iron
market for quicklime, in pieces, loose	0.0591608	remind - SSP2-NPi - 2025	RoW	kilogram		technosphere	0.0591608	quicklime, in pieces, loose
market for refractory, basic, packed	0.0154919	remind - SSP2-NPi - 2025	GLO	kilogram		technosphere	0.0154919	refractory, basic, packed
market group for electricity, medium voltage	0.0335191	remind - SSP2-NPi - 2025	RLA	kilowatt hour		technosphere	0.0335191	electricity, medium voltage
market group for electricity, medium voltage	0.107422	remind - SSP2-NPi - 2025	RNA	kilowatt hour		technosphere	0.107422	electricity, medium voltage
market group for electricity, medium voltage	0.016822	remind - SSP2-NPi - 2025	RAF	kilowatt hour		technosphere	0.016822	electricity, medium voltage
market group for electricity, medium voltage	0.30754	remind - SSP2-NPi - 2025	RAS	kilowatt hour		technosphere	0.30754	electricity, medium voltage
treatment of electric arc furnace dust, residual material landfill, optimistic, 2025	-0.0191274	steel_prod_SSP2-NPi	RoW	kilogram		technosphere	-0.0191274	electric arc furnace dust
treatment of electric arc furnace slag, residual material landfill, optimistic, 2025	-0.165106	steel_prod_SSP2-NPi	GLO	kilogram		technosphere	-0.165106	electric arc furnace slag
Activity	steel production, from primary iron, chromium steel 18/8, pessimistic, 2025
code	1882042d1b49411481e260aee01ac9be
comment	This dataset has been modified by `premise`, according to the performance for steel production indicated by the IAM model REMIND for the IAM region World in 2100, following the scenario SSP1-NDC. The energy efficiency of the process has been improved by 28%.Background: This activity represents the production of stainless steel (Type 304, aka. 18/8; assumed composition 68.6% Fe, 9.3% Ni, 19.0% Cr …
location	World
reference product	steel, chromium steel 18/8
scenario	SSP2-NPi
type	process
unit	kilogram
worksheet name	steel_prod_SSP2-NPi
year	2025
Exchanges
name	amount	database	location	unit	categories	type	default_amount	reference product
Benzene	3.63318e-07			kilogram	air	biosphere
Benzene, hexachloro-	1.54919e-09			kilogram	air	biosphere
Cadmium II	1.21655e-08			kilogram	air	biosphere
Carbon dioxide, fossil	0.033168			kilogram	air	biosphere
Carbon dioxide, non-fossil	9.475e-05			kilogram	air	biosphere
Carbon monoxide, fossil	0.000474342			kilogram	air	biosphere
Chromium III	1.83303e-07			kilogram	air	biosphere
Copper ion	7.48999e-08			kilogram	air	biosphere
Dioxins, measured as 2,3,7,8-tetrachlorodibenzo-p-dioxin	4.89898e-13			kilogram	air	biosphere
Hydrocarbons, aromatic	7.7008e-05			kilogram	air	biosphere
Hydrochloric acid	5.31037e-06			kilogram	air	biosphere
Hydrogen fluoride	2.44949e-08			kilogram	air	biosphere
Lead II	4.62331e-07			kilogram	air	biosphere
Mercury II	2e-08			kilogram	air	biosphere
Nickel II	7.74597e-08			kilogram	air	biosphere
Nitrogen oxides	7.73305e-05			kilogram	air	biosphere
PAH, polycyclic aromatic hydrocarbons	9.34345e-08			kilogram	air	biosphere
Particulate Matter, < 2.5 um	1.47224e-05			kilogram	air	biosphere
Particulate Matter, > 10 um	5.19615e-06			kilogram	air	biosphere
Particulate Matter, > 2.5 um and < 10um	1.47224e-05			kilogram	air	biosphere
Polychlorinated biphenyls	2.23607e-10			kilogram	air	biosphere
Sulfur dioxide	3.24037e-05			kilogram	air	biosphere
Water	0.0022952			cubic meter	water	biosphere
Water	0.00292117			cubic meter	air	biosphere
Water, cooling, unspecified natural origin	0.00654217			cubic meter	natural resource::in water	biosphere
Zinc II	2.19089e-06			kilogram	air	biosphere
steel production, from primary iron, chromium steel 18/8, pessimistic, 2025	1	steel_prod_SSP2-NPi	World	kilogram		production	1	steel, chromium steel 18/8
market for anode, for metal electrolysis	0.004	remind - SSP2-NPi - 2025	GLO	kilogram		technosphere	0.004	anode, for metal electrolysis
market for argon, liquid	0.032	remind - SSP2-NPi - 2025	RoW	kilogram		technosphere	0.032	argon, liquid
market for electric arc furnace converter	4e-11	remind - SSP2-NPi - 2025	GLO	unit		technosphere	4e-11	electric arc furnace converter
market for electricity, medium voltage	0.000998198	remind - SSP2-NPi - 2025	NZ	kilowatt hour		technosphere	0.000998198	electricity, medium voltage
market for electricity, medium voltage	0.00509321	remind - SSP2-NPi - 2025	AU	kilowatt hour		technosphere	0.00509321	electricity, medium voltage
market for ferrochromium, high-carbon, 68% Cr	0.26471	remind - SSP2-NPi - 2025	GLO	kilogram		technosphere	0.26471	ferrochromium, high-carbon, 68% Cr
market for ferronickel	0.32	remind - SSP2-NPi - 2025	GLO	kilogram		technosphere	0.32	ferronickel
market for hard coal	0.00691265	remind - SSP2-NPi - 2025	RoW	kilogram		technosphere	0.00691265	hard coal
market for hot rolling, steel	1	remind - SSP2-NPi - 2025	GLO	kilogram		technosphere	1	hot rolling, steel
market for inert waste, for final disposal	-0.00678233	remind - SSP2-NPi - 2025	RoW	kilogram		technosphere	-0.00678233	inert waste, for final disposal
market for natural gas, high pressure	0.00564357	remind - SSP2-NPi - 2025	RoW	cubic meter		technosphere	0.00564357	natural gas, high pressure
market for nitrogen, liquid	0.00359723	remind - SSP2-NPi - 2025	RoW	kilogram		technosphere	0.00359723	nitrogen, liquid
market for oxygen, liquid	0.036	remind - SSP2-NPi - 2025	World	kilogram		technosphere	0.036	oxygen, liquid
market for pig iron	0.55079	remind - SSP2-NPi - 2025	World	kilogram		technosphere	0.55079	pig iron
market for quicklime, in pieces, loose	0.0591608	remind - SSP2-NPi - 2025	RoW	kilogram		technosphere	0.0591608	quicklime, in pieces, loose
market for refractory, basic, packed	0.0154919	remind - SSP2-NPi - 2025	GLO	kilogram		technosphere	0.0154919	refractory, basic, packed
market group for electricity, medium voltage	0.0335191	remind - SSP2-NPi - 2025	RLA	kilowatt hour		technosphere	0.0335191	electricity, medium voltage
market group for electricity, medium voltage	0.107422	remind - SSP2-NPi - 2025	RNA	kilowatt hour		technosphere	0.107422	electricity, medium voltage
market group for electricity, medium voltage	0.016822	remind - SSP2-NPi - 2025	RAF	kilowatt hour		technosphere	0.016822	electricity, medium voltage
market group for electricity, medium voltage	0.30754	remind - SSP2-NPi - 2025	RAS	kilowatt hour		technosphere	0.30754	electricity, medium voltage
treatment of electric arc furnace dust, residual material landfill, pessimistic, 2025	-0.0191274	steel_prod_SSP2-NPi	RoW	kilogram		technosphere	-0.0191274	electric arc furnace dust
treatment of electric arc furnace slag, residual material landfill, pessimistic, 2025	-0.165106	steel_prod_SSP2-NPi	GLO	kilogram		technosphere	-0.165106	electric arc furnace slag
Activity	transport of steel scrap, from fossil infrastructure, cut-off, 2025
code	95a2d059eafc4f1ab3e04358685b4242
location	GLO
reference product	steel scrap, from fossil infrastructure, cut-off
scenario	SSP2-NPi
type	process
unit	kilogram
worksheet name	steel_prod_SSP2-NPi
year	2025
Exchanges
name	amount	database	location	unit	type	default_amount	reference product
transport of steel scrap, from fossil infrastructure, cut-off, 2025	1	steel_prod_SSP2-NPi	GLO	kilogram	production	1	steel scrap, from fossil infrastructure, cut-off
market for transport, freight, sea, bulk carrier for dry goods	0.149177	remind - SSP2-NPi - 2025	GLO	ton kilometer	technosphere	0.149177	transport, freight, sea, bulk carrier for dry goods
market group for transport, freight train	0.168713	remind - SSP2-NPi - 2025	GLO	ton kilometer	technosphere	0.168713	transport, freight train
market group for transport, freight, inland waterways, barge	0.0288316	remind - SSP2-NPi - 2025	GLO	ton kilometer	technosphere	0.0288316	transport, freight, inland waterways, barge
market group for transport, freight, lorry, unspecified	0.200456	remind - SSP2-NPi - 2025	GLO	ton kilometer	technosphere	0.200456	transport, freight, lorry, unspecified
Activity	treatment of electric arc furnace dust, residual material landfill, optimistic, 2025
code	7f452e1a0fcf40539a99ba937c4571ad
comment	Steelmaking produces large quantities of by-products, with around 450-500 kg of by-products produced per tonne of steel. The main components of these are slags (approximately 80%), along with dusts and sludges from air pollution abatement equipment (flue gas scrubbing) and mill scale. The physical or chemical natures of these by-products means that it can be difficult to find possible uses. Hence…
location	RoW
reference product	electric arc furnace dust
scenario	SSP2-NPi
type	process
unit	kilogram
worksheet name	steel_prod_SSP2-NPi
year	2025
Exchanges
name	amount	database	location	unit	categories	type	default_amount	reference product
Aluminium III	0.00187908			kilogram	water::ground-, long-term	biosphere
Aluminium III	3.13702e-06			kilogram	water::surface water	biosphere
Arsenic ion	3.68e-14			kilogram	water::ground-, long-term	biosphere
Arsenic ion	3.68e-05			kilogram	water::surface water	biosphere
BOD5, Biological Oxygen Demand	0.00828024			kilogram	water::ground-, long-term	biosphere
BOD5, Biological Oxygen Demand	1.38234e-05			kilogram	water::surface water	biosphere
Barium II	1.2473e-05			kilogram	water::ground-, long-term	biosphere
Barium II	2.08231e-08			kilogram	water::surface water	biosphere
COD, Chemical Oxygen Demand	0.0253143			kilogram	water::ground-, long-term	biosphere
COD, Chemical Oxygen Demand	4.22609e-05			kilogram	water::surface water	biosphere
Cadmium II	1.30347e-06			kilogram	water::ground-, long-term	biosphere
Cadmium II	2.17607e-09			kilogram	water::surface water	biosphere
Calcium II	0.00472573			kilogram	water::ground-, long-term	biosphere
Calcium II	7.88937e-06			kilogram	water::surface water	biosphere
Chloride	0.00778249			kilogram	water::ground-, long-term	biosphere
Chloride	0.00311751			kilogram	water::surface water	biosphere
Chromium VI	2.35e-06			kilogram	water::ground-, long-term	biosphere
Chromium VI	2.35e-06			kilogram	water::surface water	biosphere
Cobalt II	2.71832e-05			kilogram	water::ground-, long-term	biosphere
Cobalt II	4.53809e-08			kilogram	water::surface water	biosphere
Copper ion	3.92644e-05			kilogram	water::ground-, long-term	biosphere
Copper ion	6.55499e-08			kilogram	water::surface water	biosphere
DOC, Dissolved Organic Carbon	0.0100169			kilogram	water::ground-, long-term	biosphere
DOC, Dissolved Organic Carbon	1.67227e-05			kilogram	water::surface water	biosphere
Fluoride	0.00197674			kilogram	water::ground-, long-term	biosphere
Fluoride	0.000113261			kilogram	water::surface water	biosphere
Iron ion	0.0012981			kilogram	water::ground-, long-term	biosphere
Iron ion	2.16711e-06			kilogram	water::surface water	biosphere
Lead II	3.65172e-05			kilogram	water::ground-, long-term	biosphere
Lead II	6.09637e-08			kilogram	water::surface water	biosphere
Magnesium	0.0014771			kilogram	water::ground-, long-term	biosphere
Magnesium	2.46594e-06			kilogram	water::surface water	biosphere
Manganese II	0.000158598			kilogram	water::ground-, long-term	biosphere
Manganese II	2.64771e-07			kilogram	water::surface water	biosphere
Mercury II	1.42549e-06			kilogram	water::ground-, long-term	biosphere
Mercury II	2.37979e-09			kilogram	water::surface water	biosphere
Molybdenum VI	5.96836e-07			kilogram	water::ground-, long-term	biosphere
Molybdenum VI	0.000129403			kilogram	water::surface water	biosphere
Nickel II	0.000456167			kilogram	water::ground-, long-term	biosphere
Nickel II	7.61548e-07			kilogram	water::surface water	biosphere
Phosphate	0.000267841			kilogram	water::ground-, long-term	biosphere
Phosphate	4.47146e-07			kilogram	water::surface water	biosphere
Potassium I	0.00544331			kilogram	water::ground-, long-term	biosphere
Potassium I	0.00213669			kilogram	water::surface water	biosphere
Selenium IV	8.41544e-06			kilogram	water::ground-, long-term	biosphere
Selenium IV	4.58456e-06			kilogram	water::surface water	biosphere
Silicon	0.0210525			kilogram	water::ground-, long-term	biosphere
Silicon	4.74528e-05			kilogram	water::surface water	biosphere
Sodium I	0.00317358			kilogram	water::ground-, long-term	biosphere
Sodium I	0.00190642			kilogram	water::surface water	biosphere
Sulfate	0.0125605			kilogram	water::ground-, long-term	biosphere
Sulfate	0.00150955			kilogram	water::surface water	biosphere
TOC, Total Organic Carbon	0.0100169			kilogram	water::ground-, long-term	biosphere
TOC, Total Organic Carbon	1.67227e-05			kilogram	water::surface water	biosphere
Tungsten	0.00560598			kilogram	water::ground-, long-term	biosphere
Tungsten	0.00305402			kilogram	water::surface water	biosphere
Vanadium V	0.000361248			kilogram	water::ground-, long-term	biosphere
Vanadium V	1.15347e-06			kilogram	water::surface water	biosphere
Zinc II	0.000791738			kilogram	water::ground-, long-term	biosphere
Zinc II	1.32177e-06			kilogram	water::surface water	biosphere
treatment of electric arc furnace dust, residual material landfill, optimistic, 2025	-1	steel_prod_SSP2-NPi	RoW	kilogram		production	-1	electric arc furnace dust
market for cement, unspecified	0.330006	remind - SSP2-NPi - 2025	RoW	kilogram		technosphere	0.330006	cement, unspecified
market for cement, unspecified	0.00525832	remind - SSP2-NPi - 2025	BR	kilogram		technosphere	0.00525832	cement, unspecified
market for cement, unspecified	0.00123816	remind - SSP2-NPi - 2025	CO	kilogram		technosphere	0.00123816	cement, unspecified
market for cement, unspecified	0.000407486	remind - SSP2-NPi - 2025	CA-QC	kilogram		technosphere	0.000407486	cement, unspecified
market for cement, unspecified	0.0198533	remind - SSP2-NPi - 2025	Europe without Switzerland	kilogram		technosphere	0.0198533	cement, unspecified
market for cement, unspecified	0.00862865	remind - SSP2-NPi - 2025	US	kilogram		technosphere	0.00862865	cement, unspecified
market for cement, unspecified	0.000809877	remind - SSP2-NPi - 2025	PE	kilogram		technosphere	0.000809877	cement, unspecified
market for cement, unspecified	0.0010286	remind - SSP2-NPi - 2025	ZA	kilogram		technosphere	0.0010286	cement, unspecified
market for cement, unspecified	0.0327695	remind - SSP2-NPi - 2025	IN	kilogram		technosphere	0.0327695	cement, unspecified
market for process-specific burdens, residual material landfill	0.717126	remind - SSP2-NPi - 2025	RoW	kilogram		technosphere	0.717126	process-specific burdens, residual material landfill
market for process-specific burdens, residual material landfill	0.282874	remind - SSP2-NPi - 2025	Europe without Switzerland	kilogram		technosphere	0.282874	process-specific burdens, residual material landfill
market for residual material landfill	2.08333e-09	remind - SSP2-NPi - 2025	GLO	unit		technosphere	2.08333e-09	residual material landfill
market for waste cement, hydrated	-0.717126	remind - SSP2-NPi - 2025	RoW	kilogram		technosphere	-0.717126	waste cement, hydrated
market for waste cement, hydrated	-0.282874	remind - SSP2-NPi - 2025	Europe without Switzerland	kilogram		technosphere	-0.282874	waste cement, hydrated
Activity	treatment of electric arc furnace dust, residual material landfill, pessimistic, 2025
code	4773cae4739d464087695c1adb305313
comment	Steelmaking produces large quantities of by-products, with around 450-500 kg of by-products produced per tonne of steel. The main components of these are slags (approximately 80%), along with dusts and sludges from air pollution abatement equipment (flue gas scrubbing) and mill scale. The physical or chemical natures of these by-products means that it can be difficult to find possible uses. Hence…
location	RoW
reference product	electric arc furnace dust
scenario	SSP2-NPi
type	process
unit	kilogram
worksheet name	steel_prod_SSP2-NPi
year	2025
Exchanges
name	amount	database	location	unit	categories	type	default_amount	reference product
Aluminium III	0.00187908			kilogram	water::ground-, long-term	biosphere
Aluminium III	3.13702e-06			kilogram	water::surface water	biosphere
Arsenic ion	3.68e-14			kilogram	water::ground-, long-term	biosphere
Arsenic ion	3.68e-05			kilogram	water::surface water	biosphere
BOD5, Biological Oxygen Demand	0.00828024			kilogram	water::ground-, long-term	biosphere
BOD5, Biological Oxygen Demand	1.38234e-05			kilogram	water::surface water	biosphere
Barium II	1.2473e-05			kilogram	water::ground-, long-term	biosphere
Barium II	2.08231e-08			kilogram	water::surface water	biosphere
COD, Chemical Oxygen Demand	0.0253143			kilogram	water::ground-, long-term	biosphere
COD, Chemical Oxygen Demand	4.22609e-05			kilogram	water::surface water	biosphere
Cadmium II	1.30347e-06			kilogram	water::ground-, long-term	biosphere
Cadmium II	2.17607e-09			kilogram	water::surface water	biosphere
Calcium II	0.00472573			kilogram	water::ground-, long-term	biosphere
Calcium II	7.88937e-06			kilogram	water::surface water	biosphere
Chloride	0.00778249			kilogram	water::ground-, long-term	biosphere
Chloride	0.00311751			kilogram	water::surface water	biosphere
Chromium VI	0.007975			kilogram	water::ground-, long-term	biosphere
Chromium VI	0.007975			kilogram	water::surface water	biosphere
Cobalt II	2.71832e-05			kilogram	water::ground-, long-term	biosphere
Cobalt II	4.53809e-08			kilogram	water::surface water	biosphere
Copper ion	3.92644e-05			kilogram	water::ground-, long-term	biosphere
Copper ion	6.55499e-08			kilogram	water::surface water	biosphere
DOC, Dissolved Organic Carbon	0.0100169			kilogram	water::ground-, long-term	biosphere
DOC, Dissolved Organic Carbon	1.67227e-05			kilogram	water::surface water	biosphere
Fluoride	0.00197674			kilogram	water::ground-, long-term	biosphere
Fluoride	0.000113261			kilogram	water::surface water	biosphere
Iron ion	0.0012981			kilogram	water::ground-, long-term	biosphere
Iron ion	2.16711e-06			kilogram	water::surface water	biosphere
Lead II	3.65172e-05			kilogram	water::ground-, long-term	biosphere
Lead II	6.09637e-08			kilogram	water::surface water	biosphere
Magnesium	0.0014771			kilogram	water::ground-, long-term	biosphere
Magnesium	2.46594e-06			kilogram	water::surface water	biosphere
Manganese II	0.000158598			kilogram	water::ground-, long-term	biosphere
Manganese II	2.64771e-07			kilogram	water::surface water	biosphere
Mercury II	1.42549e-06			kilogram	water::ground-, long-term	biosphere
Mercury II	2.37979e-09			kilogram	water::surface water	biosphere
Molybdenum VI	5.96836e-07			kilogram	water::ground-, long-term	biosphere
Molybdenum VI	0.000129403			kilogram	water::surface water	biosphere
Nickel II	0.000456167			kilogram	water::ground-, long-term	biosphere
Nickel II	7.61548e-07			kilogram	water::surface water	biosphere
Phosphate	0.000267841			kilogram	water::ground-, long-term	biosphere
Phosphate	4.47146e-07			kilogram	water::surface water	biosphere
Potassium I	0.00544331			kilogram	water::ground-, long-term	biosphere
Potassium I	0.00213669			kilogram	water::surface water	biosphere
Selenium IV	8.41544e-06			kilogram	water::ground-, long-term	biosphere
Selenium IV	4.58456e-06			kilogram	water::surface water	biosphere
Silicon	0.0210525			kilogram	water::ground-, long-term	biosphere
Silicon	4.74528e-05			kilogram	water::surface water	biosphere
Sodium I	0.00317358			kilogram	water::ground-, long-term	biosphere
Sodium I	0.00190642			kilogram	water::surface water	biosphere
Sulfate	0.0125605			kilogram	water::ground-, long-term	biosphere
Sulfate	0.00150955			kilogram	water::surface water	biosphere
TOC, Total Organic Carbon	0.0100169			kilogram	water::ground-, long-term	biosphere
TOC, Total Organic Carbon	1.67227e-05			kilogram	water::surface water	biosphere
Tungsten	0.00560598			kilogram	water::ground-, long-term	biosphere
Tungsten	0.00305402			kilogram	water::surface water	biosphere
Vanadium V	0.000361248			kilogram	water::ground-, long-term	biosphere
Vanadium V	1.15347e-06			kilogram	water::surface water	biosphere
Zinc II	0.000791738			kilogram	water::ground-, long-term	biosphere
Zinc II	1.32177e-06			kilogram	water::surface water	biosphere
treatment of electric arc furnace dust, residual material landfill, pessimistic, 2025	-1	steel_prod_SSP2-NPi	RoW	kilogram		production	-1	electric arc furnace dust
market for cement, unspecified	0.330006	remind - SSP2-NPi - 2025	RoW	kilogram		technosphere	0.330006	cement, unspecified
market for cement, unspecified	0.00525832	remind - SSP2-NPi - 2025	BR	kilogram		technosphere	0.00525832	cement, unspecified
market for cement, unspecified	0.00123816	remind - SSP2-NPi - 2025	CO	kilogram		technosphere	0.00123816	cement, unspecified
market for cement, unspecified	0.000407486	remind - SSP2-NPi - 2025	CA-QC	kilogram		technosphere	0.000407486	cement, unspecified
market for cement, unspecified	0.0198533	remind - SSP2-NPi - 2025	Europe without Switzerland	kilogram		technosphere	0.0198533	cement, unspecified
market for cement, unspecified	0.00862865	remind - SSP2-NPi - 2025	US	kilogram		technosphere	0.00862865	cement, unspecified
market for cement, unspecified	0.000809877	remind - SSP2-NPi - 2025	PE	kilogram		technosphere	0.000809877	cement, unspecified
market for cement, unspecified	0.0010286	remind - SSP2-NPi - 2025	ZA	kilogram		technosphere	0.0010286	cement, unspecified
market for cement, unspecified	0.0327695	remind - SSP2-NPi - 2025	IN	kilogram		technosphere	0.0327695	cement, unspecified
market for process-specific burdens, residual material landfill	0.717126	remind - SSP2-NPi - 2025	RoW	kilogram		technosphere	0.717126	process-specific burdens, residual material landfill
market for process-specific burdens, residual material landfill	0.282874	remind - SSP2-NPi - 2025	Europe without Switzerland	kilogram		technosphere	0.282874	process-specific burdens, residual material landfill
market for residual material landfill	2.08333e-09	remind - SSP2-NPi - 2025	GLO	unit		technosphere	2.08333e-09	residual material landfill
market for waste cement, hydrated	-0.717126	remind - SSP2-NPi - 2025	RoW	kilogram		technosphere	-0.717126	waste cement, hydrated
market for waste cement, hydrated	-0.282874	remind - SSP2-NPi - 2025	Europe without Switzerland	kilogram		technosphere	-0.282874	waste cement, hydrated
Activity	treatment of electric arc furnace slag, residual material landfill, pessimistic, 2025
code	44067467da6748f4b9e6b5b9971725fb
comment	Based on ecoinvent 3.9.1 (original comment below). Adjusted chromium emissions. Steelmaking produces large quantities of by-products, with around 450-500 kg of by-products produced per tonne of steel. The main components of these are slags (approximately 80%), along with dusts and sludges from air pollution abatement equipment (flue gas scrubbing) and mill scale. The physical or chemical natures …
location	GLO
reference product	electric arc furnace slag
scenario	SSP2-NPi
unit	kilogram
worksheet name	steel_prod_SSP2-NPi
year	2025
Exchanges
name	amount	database	location	unit	categories	type	reference product
Aluminium III	0.0110132	biosphere3		kilogram	water::ground-, long-term	biosphere
Aluminium III	1.8386e-05	biosphere3		kilogram	water::surface water	biosphere
Antimony ion	2.58937e-06	biosphere3		kilogram	water::ground-, long-term	biosphere
Antimony ion	1.41063e-06	biosphere3		kilogram	water::surface water	biosphere
Arsenic ion	8.51e-16	biosphere3		kilogram	water::ground-, long-term	biosphere
Arsenic ion	8.51e-07	biosphere3		kilogram	water::surface water	biosphere
BOD5, Biological Oxygen Demand	0.00142634	biosphere3		kilogram	water::ground-, long-term	biosphere
BOD5, Biological Oxygen Demand	2.3812e-06	biosphere3		kilogram	water::surface water	biosphere
Barium II	3.44454e-06	biosphere3		kilogram	water::ground-, long-term	biosphere
Barium II	5.75049e-09	biosphere3		kilogram	water::surface water	biosphere
Beryllium II	3.98241e-07	biosphere3		kilogram	water::ground-, long-term	biosphere
Beryllium II	6.64843e-10	biosphere3		kilogram	water::surface water	biosphere
COD, Chemical Oxygen Demand	0.00436059	biosphere3		kilogram	water::ground-, long-term	biosphere
COD, Chemical Oxygen Demand	7.27978e-06	biosphere3		kilogram	water::surface water	biosphere
Cadmium II	5.15955e-08	biosphere3		kilogram	water::ground-, long-term	biosphere
Cadmium II	8.61361e-11	biosphere3		kilogram	water::surface water	biosphere
Calcium II	0.0226799	biosphere3		kilogram	water::ground-, long-term	biosphere
Calcium II	3.78629e-05	biosphere3		kilogram	water::surface water	biosphere
Chromium III	0.0493	biosphere3		kilogram	water::ground-, long-term	biosphere
Chromium III	0.0493	biosphere3		kilogram	water::surface water	biosphere
Chromium VI	3.35885e-05	biosphere3		kilogram	water::ground-, long-term	biosphere
Chromium VI	3.35885e-05	biosphere3		kilogram	water::surface water	biosphere
Cobalt II	8.20624e-07	biosphere3		kilogram	water::ground-, long-term	biosphere
Cobalt II	1.36999e-09	biosphere3		kilogram	water::surface water	biosphere
Copper ion	2.4521e-05	biosphere3		kilogram	water::ground-, long-term	biosphere
Copper ion	4.09366e-08	biosphere3		kilogram	water::surface water	biosphere
DOC, Dissolved Organic Carbon	0.00172549	biosphere3		kilogram	water::ground-, long-term	biosphere
DOC, Dissolved Organic Carbon	2.88063e-06	biosphere3		kilogram	water::surface water	biosphere
Fluoride	0.0189162	biosphere3		kilogram	water::ground-, long-term	biosphere
Fluoride	0.00108384	biosphere3		kilogram	water::surface water	biosphere
Iron ion	0.000796903	biosphere3		kilogram	water::ground-, long-term	biosphere
Iron ion	1.33039e-06	biosphere3		kilogram	water::surface water	biosphere
Lead II	1.26047e-06	biosphere3		kilogram	water::ground-, long-term	biosphere
Lead II	2.10429e-09	biosphere3		kilogram	water::surface water	biosphere
Magnesium	0.00570387	biosphere3		kilogram	water::ground-, long-term	biosphere
Magnesium	9.52231e-06	biosphere3		kilogram	water::surface water	biosphere
Manganese II	0.000289936	biosphere3		kilogram	water::ground-, long-term	biosphere
Manganese II	4.84034e-07	biosphere3		kilogram	water::surface water	biosphere
Mercury II	1.88807e-09	biosphere3		kilogram	water::ground-, long-term	biosphere
Mercury II	3.15204e-12	biosphere3		kilogram	water::surface water	biosphere
Molybdenum VI	8.26388e-07	biosphere3		kilogram	water::ground-, long-term	biosphere
Molybdenum VI	0.000179174	biosphere3		kilogram	water::surface water	biosphere
Nickel II	6.95112e-05	biosphere3		kilogram	water::ground-, long-term	biosphere
Nickel II	1.16045e-07	biosphere3		kilogram	water::surface water	biosphere
Phosphate	0.000589798	biosphere3		kilogram	water::ground-, long-term	biosphere
Phosphate	9.84637e-07	biosphere3		kilogram	water::surface water	biosphere
Potassium I	0.000797108	biosphere3		kilogram	water::ground-, long-term	biosphere
Potassium I	0.000312892	biosphere3		kilogram	water::surface water	biosphere
Selenium IV	1.16521e-05	biosphere3		kilogram	water::ground-, long-term	biosphere
Selenium IV	6.34785e-06	biosphere3		kilogram	water::surface water	biosphere
Silicon	0.083412	biosphere3		kilogram	water::ground-, long-term	biosphere
Silicon	0.000188012	biosphere3		kilogram	water::surface water	biosphere
Silver I	3.23354e-07	biosphere3		kilogram	water::ground-, long-term	biosphere
Silver I	5.39823e-10	biosphere3		kilogram	water::surface water	biosphere
Sodium I	0.000383579	biosphere3		kilogram	water::ground-, long-term	biosphere
Sodium I	0.000230421	biosphere3		kilogram	water::surface water	biosphere
Sulfate	0.00415111	biosphere3		kilogram	water::ground-, long-term	biosphere
Sulfate	0.000498892	biosphere3		kilogram	water::surface water	biosphere
TOC, Total Organic Carbon	0.00172549	biosphere3		kilogram	water::ground-, long-term	biosphere
TOC, Total Organic Carbon	2.88063e-06	biosphere3		kilogram	water::surface water	biosphere
Thallium I	3.98241e-06	biosphere3		kilogram	water::ground-, long-term	biosphere
Thallium I	6.64843e-09	biosphere3		kilogram	water::surface water	biosphere
Tin ion	1.89493e-07	biosphere3		kilogram	water::ground-, long-term	biosphere
Tin ion	3.16349e-10	biosphere3		kilogram	water::surface water	biosphere
Titanium ion	0.000926179	biosphere3		kilogram	water::ground-, long-term	biosphere
Titanium ion	1.54621e-06	biosphere3		kilogram	water::surface water	biosphere
Vanadium V	0.000684066	biosphere3		kilogram	water::ground-, long-term	biosphere
Vanadium V	2.18424e-06	biosphere3		kilogram	water::surface water	biosphere
Zinc II	5.44166e-06	biosphere3		kilogram	water::ground-, long-term	biosphere
Zinc II	9.08458e-09	biosphere3		kilogram	water::surface water	biosphere
treatment of electric arc furnace slag, residual material landfill, pessimistic, 2025	-1	steel_prod_SSP2-NPi	GLO	kilogram		production	electric arc furnace slag
market for cement, unspecified	0.00525832	remind - SSP2-NPi - 2025	BR	kilogram		technosphere	cement, unspecified
market for cement, unspecified	0.00123816	remind - SSP2-NPi - 2025	CO	kilogram		technosphere	cement, unspecified
market for cement, unspecified	0.000407486	remind - SSP2-NPi - 2025	CA-QC	kilogram		technosphere	cement, unspecified
market for cement, unspecified	0.0198533	remind - SSP2-NPi - 2025	Europe without Switzerland	kilogram		technosphere	cement, unspecified
market for cement, unspecified	0.00862865	remind - SSP2-NPi - 2025	US	kilogram		technosphere	cement, unspecified
market for cement, unspecified	0.000809877	remind - SSP2-NPi - 2025	PE	kilogram		technosphere	cement, unspecified
market for cement, unspecified	0.0010286	remind - SSP2-NPi - 2025	ZA	kilogram		technosphere	cement, unspecified
market for cement, unspecified	0.0327695	remind - SSP2-NPi - 2025	IN	kilogram		technosphere	cement, unspecified
market for cement, unspecified	0.330006	remind - SSP2-NPi - 2025	RoW	kilogram		technosphere	cement, unspecified
market for process-specific burdens, residual material landfill	0.282874	remind - SSP2-NPi - 2025	Europe without Switzerland	kilogram		technosphere	process-specific burdens, residual material landfill
market for process-specific burdens, residual material landfill	0.717126	remind - SSP2-NPi - 2025	RoW	kilogram		technosphere	process-specific burdens, residual material landfill
market for residual material landfill	2.08333e-09	remind - SSP2-NPi - 2025	GLO	unit		technosphere	residual material landfill
market for waste cement, hydrated	-0.282874	remind - SSP2-NPi - 2025	Europe without Switzerland	kilogram		technosphere	waste cement, hydrated
market for waste cement, hydrated	-0.717126	remind - SSP2-NPi - 2025	RoW	kilogram		technosphere	waste cement, hydrated
Activity	treatment of electric arc furnace slag, residual material landfill, optimistic, 2025
code	44067467da6748f4b9e6b5b99717b75a
comment	Based on ecoinvent 3.9.1 (original comment below). Adjusted chromium emissions. Steelmaking produces large quantities of by-products, with around 450-500 kg of by-products produced per tonne of steel. The main components of these are slags (approximately 80%), along with dusts and sludges from air pollution abatement equipment (flue gas scrubbing) and mill scale. The physical or chemical natures …
location	GLO
reference product	electric arc furnace slag
scenario	SSP2-NPi
unit	kilogram
worksheet name	steel_prod_SSP2-NPi
year	2025
Exchanges
name	amount	database	location	unit	categories	type	reference product
Aluminium III	0.0110132	biosphere3		kilogram	water::ground-, long-term	biosphere
Aluminium III	1.8386e-05	biosphere3		kilogram	water::surface water	biosphere
Antimony ion	2.58937e-06	biosphere3		kilogram	water::ground-, long-term	biosphere
Antimony ion	1.41063e-06	biosphere3		kilogram	water::surface water	biosphere
Arsenic ion	8.51e-16	biosphere3		kilogram	water::ground-, long-term	biosphere
Arsenic ion	8.51e-07	biosphere3		kilogram	water::surface water	biosphere
BOD5, Biological Oxygen Demand	0.00142634	biosphere3		kilogram	water::ground-, long-term	biosphere
BOD5, Biological Oxygen Demand	2.3812e-06	biosphere3		kilogram	water::surface water	biosphere
Barium II	3.44454e-06	biosphere3		kilogram	water::ground-, long-term	biosphere
Barium II	5.75049e-09	biosphere3		kilogram	water::surface water	biosphere
Beryllium II	3.98241e-07	biosphere3		kilogram	water::ground-, long-term	biosphere
Beryllium II	6.64843e-10	biosphere3		kilogram	water::surface water	biosphere
COD, Chemical Oxygen Demand	0.00436059	biosphere3		kilogram	water::ground-, long-term	biosphere
COD, Chemical Oxygen Demand	7.27978e-06	biosphere3		kilogram	water::surface water	biosphere
Cadmium II	5.15955e-08	biosphere3		kilogram	water::ground-, long-term	biosphere
Cadmium II	8.61361e-11	biosphere3		kilogram	water::surface water	biosphere
Calcium II	0.0226799	biosphere3		kilogram	water::ground-, long-term	biosphere
Calcium II	3.78629e-05	biosphere3		kilogram	water::surface water	biosphere
Chromium III	0.0493	biosphere3		kilogram	water::ground-, long-term	biosphere
Chromium III	0.0493	biosphere3		kilogram	water::surface water	biosphere
Chromium VI	6.86723e-08	biosphere3		kilogram	water::ground-, long-term	biosphere
Chromium VI	6.86723e-08	biosphere3		kilogram	water::surface water	biosphere
Cobalt II	8.20624e-07	biosphere3		kilogram	water::ground-, long-term	biosphere
Cobalt II	1.36999e-09	biosphere3		kilogram	water::surface water	biosphere
Copper ion	2.4521e-05	biosphere3		kilogram	water::ground-, long-term	biosphere
Copper ion	4.09366e-08	biosphere3		kilogram	water::surface water	biosphere
DOC, Dissolved Organic Carbon	0.00172549	biosphere3		kilogram	water::ground-, long-term	biosphere
DOC, Dissolved Organic Carbon	2.88063e-06	biosphere3		kilogram	water::surface water	biosphere
Fluoride	0.0189162	biosphere3		kilogram	water::ground-, long-term	biosphere
Fluoride	0.00108384	biosphere3		kilogram	water::surface water	biosphere
Iron ion	0.000796903	biosphere3		kilogram	water::ground-, long-term	biosphere
Iron ion	1.33039e-06	biosphere3		kilogram	water::surface water	biosphere
Lead II	1.26047e-06	biosphere3		kilogram	water::ground-, long-term	biosphere
Lead II	2.10429e-09	biosphere3		kilogram	water::surface water	biosphere
Magnesium	0.00570387	biosphere3		kilogram	water::ground-, long-term	biosphere
Magnesium	9.52231e-06	biosphere3		kilogram	water::surface water	biosphere
Manganese II	0.000289936	biosphere3		kilogram	water::ground-, long-term	biosphere
Manganese II	4.84034e-07	biosphere3		kilogram	water::surface water	biosphere
Mercury II	1.88807e-09	biosphere3		kilogram	water::ground-, long-term	biosphere
Mercury II	3.15204e-12	biosphere3		kilogram	water::surface water	biosphere
Molybdenum VI	8.26388e-07	biosphere3		kilogram	water::ground-, long-term	biosphere
Molybdenum VI	0.000179174	biosphere3		kilogram	water::surface water	biosphere
Nickel II	6.95112e-05	biosphere3		kilogram	water::ground-, long-term	biosphere
Nickel II	1.16045e-07	biosphere3		kilogram	water::surface water	biosphere
Phosphate	0.000589798	biosphere3		kilogram	water::ground-, long-term	biosphere
Phosphate	9.84637e-07	biosphere3		kilogram	water::surface water	biosphere
Potassium I	0.000797108	biosphere3		kilogram	water::ground-, long-term	biosphere
Potassium I	0.000312892	biosphere3		kilogram	water::surface water	biosphere
Selenium IV	1.16521e-05	biosphere3		kilogram	water::ground-, long-term	biosphere
Selenium IV	6.34785e-06	biosphere3		kilogram	water::surface water	biosphere
Silicon	0.083412	biosphere3		kilogram	water::ground-, long-term	biosphere
Silicon	0.000188012	biosphere3		kilogram	water::surface water	biosphere
Silver I	3.23354e-07	biosphere3		kilogram	water::ground-, long-term	biosphere
Silver I	5.39823e-10	biosphere3		kilogram	water::surface water	biosphere
Sodium I	0.000383579	biosphere3		kilogram	water::ground-, long-term	biosphere
Sodium I	0.000230421	biosphere3		kilogram	water::surface water	biosphere
Sulfate	0.00415111	biosphere3		kilogram	water::ground-, long-term	biosphere
Sulfate	0.000498892	biosphere3		kilogram	water::surface water	biosphere
TOC, Total Organic Carbon	0.00172549	biosphere3		kilogram	water::ground-, long-term	biosphere
TOC, Total Organic Carbon	2.88063e-06	biosphere3		kilogram	water::surface water	biosphere
Thallium I	3.98241e-06	biosphere3		kilogram	water::ground-, long-term	biosphere
Thallium I	6.64843e-09	biosphere3		kilogram	water::surface water	biosphere
Tin ion	1.89493e-07	biosphere3		kilogram	water::ground-, long-term	biosphere
Tin ion	3.16349e-10	biosphere3		kilogram	water::surface water	biosphere
Titanium ion	0.000926179	biosphere3		kilogram	water::ground-, long-term	biosphere
Titanium ion	1.54621e-06	biosphere3		kilogram	water::surface water	biosphere
Vanadium V	0.000684066	biosphere3		kilogram	water::ground-, long-term	biosphere
Vanadium V	2.18424e-06	biosphere3		kilogram	water::surface water	biosphere
Zinc II	5.44166e-06	biosphere3		kilogram	water::ground-, long-term	biosphere
Zinc II	9.08458e-09	biosphere3		kilogram	water::surface water	biosphere
treatment of electric arc furnace slag, residual material landfill, optimistic, 2025	-1	steel_prod_SSP2-NPi	GLO	kilogram		production	electric arc furnace slag
market for cement, unspecified	0.00525832	remind - SSP2-NPi - 2025	BR	kilogram		technosphere	cement, unspecified
market for cement, unspecified	0.00123816	remind - SSP2-NPi - 2025	CO	kilogram		technosphere	cement, unspecified
market for cement, unspecified	0.000407486	remind - SSP2-NPi - 2025	CA-QC	kilogram		technosphere	cement, unspecified
market for cement, unspecified	0.0198533	remind - SSP2-NPi - 2025	Europe without Switzerland	kilogram		technosphere	cement, unspecified
market for cement, unspecified	0.00862865	remind - SSP2-NPi - 2025	US	kilogram		technosphere	cement, unspecified
market for cement, unspecified	0.000809877	remind - SSP2-NPi - 2025	PE	kilogram		technosphere	cement, unspecified
market for cement, unspecified	0.0010286	remind - SSP2-NPi - 2025	ZA	kilogram		technosphere	cement, unspecified
market for cement, unspecified	0.0327695	remind - SSP2-NPi - 2025	IN	kilogram		technosphere	cement, unspecified
market for cement, unspecified	0.330006	remind - SSP2-NPi - 2025	RoW	kilogram		technosphere	cement, unspecified
market for process-specific burdens, residual material landfill	0.282874	remind - SSP2-NPi - 2025	Europe without Switzerland	kilogram		technosphere	process-specific burdens, residual material landfill
market for process-specific burdens, residual material landfill	0.717126	remind - SSP2-NPi - 2025	RoW	kilogram		technosphere	process-specific burdens, residual material landfill
market for residual material landfill	2.08333e-09	remind - SSP2-NPi - 2025	GLO	unit		technosphere	residual material landfill
market for waste cement, hydrated	-0.282874	remind - SSP2-NPi - 2025	Europe without Switzerland	kilogram		technosphere	waste cement, hydrated
market for waste cement, hydrated	-0.717126	remind - SSP2-NPi - 2025	RoW	kilogram		technosphere	waste cement, hydrated
