# Supplementary material for: Digesting fossil infrastructure for cleaner energy transitions
Source: Research Square preprint supplement (doi:10.21203/rs.3.rs-6346491/v1), 2025-06-06
Supplement: Supplementary file 137 [file lci-steel_prod_SSP1-NDC.xlsx]

## Sheet: steel_prod_SSP1-NDC
Database	steel_prod_SSP1-NDC
format	Brightway2 copy
Activity	preperation for recycling, steel scrap, from fossil infrastructure, 2025
code	cdddcbcb6f814206b85bed72e4adf723
location	GLO
reference product	steel scrap, from fossil infrastructure
scenario	SSP1-NDC
type	process
unit	kilogram
worksheet name	steel_prod_SSP1-NDC
year	2025
Exchanges
name	amount	database	location	unit	type	reference product
preperation for recycling, steel scrap, from fossil infrastructure, 2025	1	steel_prod_SSP1-NDC	GLO	kilogram	production	steel scrap, from fossil infrastructure
sorting and pressing of metal scrap, 2025	1	steel_prod_SSP1-NDC	GLO	kilogram	technosphere	sorting and pressing of metal scrap
transport of steel scrap, from fossil infrastructure, cut-off, 2025	1	steel_prod_SSP1-NDC	GLO	kilogram	technosphere	steel scrap, from fossil infrastructure, cut-off
Activity	preperation for recycling, steel scrap, from fossil infrastructure, 2030
code	34501f76d2344379a3cfc021b25578a8
location	GLO
reference product	steel scrap, from fossil infrastructure
scenario	SSP1-NDC
type	process
unit	kilogram
worksheet name	steel_prod_SSP1-NDC
year	2030
Exchanges
name	amount	database	location	unit	type	reference product
preperation for recycling, steel scrap, from fossil infrastructure, 2030	1	steel_prod_SSP1-NDC	GLO	kilogram	production	steel scrap, from fossil infrastructure
sorting and pressing of metal scrap, 2030	1	steel_prod_SSP1-NDC	GLO	kilogram	technosphere	sorting and pressing of metal scrap
transport of steel scrap, from fossil infrastructure, cut-off, 2030	1	steel_prod_SSP1-NDC	GLO	kilogram	technosphere	steel scrap, from fossil infrastructure, cut-off
Activity	preperation for recycling, steel scrap, from fossil infrastructure, 2035
code	2175af906d01428a968b9e122b36f7d2
location	GLO
reference product	steel scrap, from fossil infrastructure
scenario	SSP1-NDC
type	process
unit	kilogram
worksheet name	steel_prod_SSP1-NDC
year	2035
Exchanges
name	amount	database	location	unit	type	reference product
preperation for recycling, steel scrap, from fossil infrastructure, 2035	1	steel_prod_SSP1-NDC	GLO	kilogram	production	steel scrap, from fossil infrastructure
sorting and pressing of metal scrap, 2035	1	steel_prod_SSP1-NDC	GLO	kilogram	technosphere	sorting and pressing of metal scrap
transport of steel scrap, from fossil infrastructure, cut-off, 2035	1	steel_prod_SSP1-NDC	GLO	kilogram	technosphere	steel scrap, from fossil infrastructure, cut-off
Activity	preperation for recycling, steel scrap, from fossil infrastructure, 2040
code	a1c9a21785ff45a38d9e2cb1c9c25c89
location	GLO
reference product	steel scrap, from fossil infrastructure
scenario	SSP1-NDC
type	process
unit	kilogram
worksheet name	steel_prod_SSP1-NDC
year	2040
Exchanges
name	amount	database	location	unit	type	reference product
preperation for recycling, steel scrap, from fossil infrastructure, 2040	1	steel_prod_SSP1-NDC	GLO	kilogram	production	steel scrap, from fossil infrastructure
sorting and pressing of metal scrap, 2040	1	steel_prod_SSP1-NDC	GLO	kilogram	technosphere	sorting and pressing of metal scrap
transport of steel scrap, from fossil infrastructure, cut-off, 2040	1	steel_prod_SSP1-NDC	GLO	kilogram	technosphere	steel scrap, from fossil infrastructure, cut-off
Activity	preperation for recycling, steel scrap, from fossil infrastructure, 2045
code	543859d028a949419707096b76c73988
location	GLO
reference product	steel scrap, from fossil infrastructure
scenario	SSP1-NDC
type	process
unit	kilogram
worksheet name	steel_prod_SSP1-NDC
year	2045
Exchanges
name	amount	database	location	unit	type	reference product
preperation for recycling, steel scrap, from fossil infrastructure, 2045	1	steel_prod_SSP1-NDC	GLO	kilogram	production	steel scrap, from fossil infrastructure
sorting and pressing of metal scrap, 2045	1	steel_prod_SSP1-NDC	GLO	kilogram	technosphere	sorting and pressing of metal scrap
transport of steel scrap, from fossil infrastructure, cut-off, 2045	1	steel_prod_SSP1-NDC	GLO	kilogram	technosphere	steel scrap, from fossil infrastructure, cut-off
Activity	preperation for recycling, steel scrap, from fossil infrastructure, 2050
code	f7ec7b3d47c84d6c9e1db566681e1549
location	GLO
reference product	steel scrap, from fossil infrastructure
scenario	SSP1-NDC
type	process
unit	kilogram
worksheet name	steel_prod_SSP1-NDC
year	2050
Exchanges
name	amount	database	location	unit	type	reference product
preperation for recycling, steel scrap, from fossil infrastructure, 2050	1	steel_prod_SSP1-NDC	GLO	kilogram	production	steel scrap, from fossil infrastructure
sorting and pressing of metal scrap, 2050	1	steel_prod_SSP1-NDC	GLO	kilogram	technosphere	sorting and pressing of metal scrap
transport of steel scrap, from fossil infrastructure, cut-off, 2050	1	steel_prod_SSP1-NDC	GLO	kilogram	technosphere	steel scrap, from fossil infrastructure, cut-off
Activity	reinforcing steel production, converter, 2025
code	31f157905c3e44a1a95583de072493d3
comment	Based on "reinforcing steel production" in ecoinvent 3.9.1 cutoff. Market mix of unalloyed and low-alloyed steel substituted with primary equivalent.
location	GLO
production amount	1
reference product	reinforcing steel
scenario	SSP1-NDC
type	process
unit	kilogram
worksheet name	steel_prod_SSP1-NDC
year	2025
Exchanges
name	amount	database	location	unit	type	reference product
reinforcing steel production, converter, 2025	1	steel_prod_SSP1-NDC	GLO	kilogram	production	reinforcing steel
market for hot rolling, steel	1	remind - SSP1-NDC - 2025	GLO	kilogram	technosphere	hot rolling, steel
steel production, converter, low-alloyed, 2025	0.37	steel_prod_SSP1-NDC	World	kilogram	technosphere	steel, low-alloyed
steel production, converter, unalloyed	0.63	remind - SSP1-NDC - 2025	World	kilogram	technosphere	steel, unalloyed
Activity	reinforcing steel production, converter, 2030
code	53b1b223a60a4b7ab7b10f00bd5f603d
comment	Based on "reinforcing steel production" in ecoinvent 3.9.1 cutoff. Market mix of unalloyed and low-alloyed steel substituted with primary equivalent.
location	GLO
production amount	1
reference product	reinforcing steel
scenario	SSP1-NDC
type	process
unit	kilogram
worksheet name	steel_prod_SSP1-NDC
year	2030
Exchanges
name	amount	database	location	unit	type	reference product
reinforcing steel production, converter, 2030	1	steel_prod_SSP1-NDC	GLO	kilogram	production	reinforcing steel
market for hot rolling, steel	1	remind - SSP1-NDC - 2030	GLO	kilogram	technosphere	hot rolling, steel
steel production, converter, low-alloyed, 2030	0.37	steel_prod_SSP1-NDC	World	kilogram	technosphere	steel, low-alloyed
steel production, converter, unalloyed	0.63	remind - SSP1-NDC - 2030	World	kilogram	technosphere	steel, unalloyed
Activity	reinforcing steel production, converter, 2035
code	6e6f0491239845ce863cd7addf5ce42b
comment	Based on "reinforcing steel production" in ecoinvent 3.9.1 cutoff. Market mix of unalloyed and low-alloyed steel substituted with primary equivalent.
location	GLO
production amount	1
reference product	reinforcing steel
scenario	SSP1-NDC
type	process
unit	kilogram
worksheet name	steel_prod_SSP1-NDC
year	2035
Exchanges
name	amount	database	location	unit	type	reference product
reinforcing steel production, converter, 2035	1	steel_prod_SSP1-NDC	GLO	kilogram	production	reinforcing steel
market for hot rolling, steel	1	remind - SSP1-NDC - 2035	GLO	kilogram	technosphere	hot rolling, steel
steel production, converter, low-alloyed, 2035	0.37	steel_prod_SSP1-NDC	World	kilogram	technosphere	steel, low-alloyed
steel production, converter, unalloyed	0.63	remind - SSP1-NDC - 2035	World	kilogram	technosphere	steel, unalloyed
Activity	reinforcing steel production, converter, 2040
code	8e2012f6f88741aca90b8026e2f63a02
comment	Based on "reinforcing steel production" in ecoinvent 3.9.1 cutoff. Market mix of unalloyed and low-alloyed steel substituted with primary equivalent.
location	GLO
production amount	1
reference product	reinforcing steel
scenario	SSP1-NDC
type	process
unit	kilogram
worksheet name	steel_prod_SSP1-NDC
year	2040
Exchanges
name	amount	database	location	unit	type	reference product
reinforcing steel production, converter, 2040	1	steel_prod_SSP1-NDC	GLO	kilogram	production	reinforcing steel
market for hot rolling, steel	1	remind - SSP1-NDC - 2040	GLO	kilogram	technosphere	hot rolling, steel
steel production, converter, low-alloyed, 2040	0.37	steel_prod_SSP1-NDC	World	kilogram	technosphere	steel, low-alloyed
steel production, converter, unalloyed	0.63	remind - SSP1-NDC - 2040	World	kilogram	technosphere	steel, unalloyed
Activity	reinforcing steel production, converter, 2045
code	d950af6fca0d493ab9be6515ae615f64
comment	Based on "reinforcing steel production" in ecoinvent 3.9.1 cutoff. Market mix of unalloyed and low-alloyed steel substituted with primary equivalent.
location	GLO
production amount	1
reference product	reinforcing steel
scenario	SSP1-NDC
type	process
unit	kilogram
worksheet name	steel_prod_SSP1-NDC
year	2045
Exchanges
name	amount	database	location	unit	type	reference product
reinforcing steel production, converter, 2045	1	steel_prod_SSP1-NDC	GLO	kilogram	production	reinforcing steel
market for hot rolling, steel	1	remind - SSP1-NDC - 2045	GLO	kilogram	technosphere	hot rolling, steel
steel production, converter, low-alloyed, 2045	0.37	steel_prod_SSP1-NDC	World	kilogram	technosphere	steel, low-alloyed
steel production, converter, unalloyed	0.63	remind - SSP1-NDC - 2045	World	kilogram	technosphere	steel, unalloyed
Activity	reinforcing steel production, converter, 2050
code	f8f333cd0f2d475cb0b69becb52bb550
comment	Based on "reinforcing steel production" in ecoinvent 3.9.1 cutoff. Market mix of unalloyed and low-alloyed steel substituted with primary equivalent.
location	GLO
production amount	1
reference product	reinforcing steel
scenario	SSP1-NDC
type	process
unit	kilogram
worksheet name	steel_prod_SSP1-NDC
year	2050
Exchanges
name	amount	database	location	unit	type	reference product
reinforcing steel production, converter, 2050	1	steel_prod_SSP1-NDC	GLO	kilogram	production	reinforcing steel
market for hot rolling, steel	1	remind - SSP1-NDC - 2050	GLO	kilogram	technosphere	hot rolling, steel
steel production, converter, low-alloyed, 2050	0.37	steel_prod_SSP1-NDC	World	kilogram	technosphere	steel, low-alloyed
steel production, converter, unalloyed	0.63	remind - SSP1-NDC - 2050	World	kilogram	technosphere	steel, unalloyed
Activity	sorting and pressing of metal scrap, 2025
code	2908181e34534289ac9580fb79d466b4
location	GLO
reference product	sorting and pressing of metal scrap
scenario	SSP1-NDC
type	process
unit	kilogram
worksheet name	steel_prod_SSP1-NDC
year	2025
Exchanges
name	amount	database	location	unit	type	reference product
sorting and pressing of metal scrap, 2025	1	steel_prod_SSP1-NDC	GLO	kilogram	production	sorting and pressing of metal scrap
diesel, burned in building machine	0.1	remind - SSP1-NDC - 2025	GLO	megajoule	technosphere	diesel, burned in building machine
market for scrap preparation facility	1e-09	remind - SSP1-NDC - 2025	GLO	unit	technosphere	scrap preparation facility
market group for electricity, medium voltage	0.01	remind - SSP1-NDC - 2025	GLO	kilowatt hour	technosphere	electricity, medium voltage
Activity	sorting and pressing of metal scrap, 2030
code	a55ecfa983a44b8a954539cbacecc409
location	GLO
reference product	sorting and pressing of metal scrap
scenario	SSP1-NDC
type	process
unit	kilogram
worksheet name	steel_prod_SSP1-NDC
year	2030
Exchanges
name	amount	database	location	unit	type	reference product
sorting and pressing of metal scrap, 2030	1	steel_prod_SSP1-NDC	GLO	kilogram	production	sorting and pressing of metal scrap
diesel, burned in building machine	0.1	remind - SSP1-NDC - 2030	GLO	megajoule	technosphere	diesel, burned in building machine
market for scrap preparation facility	1e-09	remind - SSP1-NDC - 2030	GLO	unit	technosphere	scrap preparation facility
market group for electricity, medium voltage	0.01	remind - SSP1-NDC - 2030	GLO	kilowatt hour	technosphere	electricity, medium voltage
Activity	sorting and pressing of metal scrap, 2035
code	bfefb743103b4c7fb989a7b2a83878d1
location	GLO
reference product	sorting and pressing of metal scrap
scenario	SSP1-NDC
type	process
unit	kilogram
worksheet name	steel_prod_SSP1-NDC
year	2035
Exchanges
name	amount	database	location	unit	type	reference product
sorting and pressing of metal scrap, 2035	1	steel_prod_SSP1-NDC	GLO	kilogram	production	sorting and pressing of metal scrap
diesel, burned in building machine	0.1	remind - SSP1-NDC - 2035	GLO	megajoule	technosphere	diesel, burned in building machine
market for scrap preparation facility	1e-09	remind - SSP1-NDC - 2035	GLO	unit	technosphere	scrap preparation facility
market group for electricity, medium voltage	0.01	remind - SSP1-NDC - 2035	GLO	kilowatt hour	technosphere	electricity, medium voltage
Activity	sorting and pressing of metal scrap, 2040
code	bceaeae32f78479bb1e4a36545c8ca34
location	GLO
reference product	sorting and pressing of metal scrap
scenario	SSP1-NDC
type	process
unit	kilogram
worksheet name	steel_prod_SSP1-NDC
year	2040
Exchanges
name	amount	database	location	unit	type	reference product
sorting and pressing of metal scrap, 2040	1	steel_prod_SSP1-NDC	GLO	kilogram	production	sorting and pressing of metal scrap
diesel, burned in building machine	0.1	remind - SSP1-NDC - 2040	GLO	megajoule	technosphere	diesel, burned in building machine
market for scrap preparation facility	1e-09	remind - SSP1-NDC - 2040	GLO	unit	technosphere	scrap preparation facility
market group for electricity, medium voltage	0.01	remind - SSP1-NDC - 2040	GLO	kilowatt hour	technosphere	electricity, medium voltage
Activity	sorting and pressing of metal scrap, 2045
code	c4b6671e13454884a4f65537545666c6
location	GLO
reference product	sorting and pressing of metal scrap
scenario	SSP1-NDC
type	process
unit	kilogram
worksheet name	steel_prod_SSP1-NDC
year	2045
Exchanges
name	amount	database	location	unit	type	reference product
sorting and pressing of metal scrap, 2045	1	steel_prod_SSP1-NDC	GLO	kilogram	production	sorting and pressing of metal scrap
diesel, burned in building machine	0.1	remind - SSP1-NDC - 2045	GLO	megajoule	technosphere	diesel, burned in building machine
market for scrap preparation facility	1e-09	remind - SSP1-NDC - 2045	GLO	unit	technosphere	scrap preparation facility
market group for electricity, medium voltage	0.01	remind - SSP1-NDC - 2045	GLO	kilowatt hour	technosphere	electricity, medium voltage
Activity	sorting and pressing of metal scrap, 2050
code	e39aff568ff149f7b379da196414935a
location	GLO
reference product	sorting and pressing of metal scrap
scenario	SSP1-NDC
type	process
unit	kilogram
worksheet name	steel_prod_SSP1-NDC
year	2050
Exchanges
name	amount	database	location	unit	type	reference product
sorting and pressing of metal scrap, 2050	1	steel_prod_SSP1-NDC	GLO	kilogram	production	sorting and pressing of metal scrap
diesel, burned in building machine	0.1	remind - SSP1-NDC - 2050	GLO	megajoule	technosphere	diesel, burned in building machine
market for scrap preparation facility	1e-09	remind - SSP1-NDC - 2050	GLO	unit	technosphere	scrap preparation facility
market group for electricity, medium voltage	0.01	remind - SSP1-NDC - 2050	GLO	kilowatt hour	technosphere	electricity, medium voltage
Activity	steel production, converter, low-alloyed, 2025
code	6c7dc8edc2594dfba72b1345367ef7e7
comment	This dataset has been modified by `premise`, according to the performance for steel production indicated by the IAM model REMIND for the IAM region World in 2100, following the scenario SSP1-NDC. The energy efficiency of the process has been improved by 12%."Background: This activity represents the production of primary low-alloyed steel in a basic oxygen furnace (BOF), a discontinuous process in…
location	World
reference product	steel, low-alloyed
scenario	SSP1-NDC
type	process
unit	kilogram
worksheet name	steel_prod_SSP1-NDC
year	2025
Exchanges
name	amount	database	location	unit	categories	type	reference product
Carbon dioxide, fossil	0.0626236			kilogram	air	biosphere
Carbon dioxide, non-fossil	2.04331e-05			kilogram	air	biosphere
Carbon monoxide, fossil	0.00168214			kilogram	air	biosphere
Chromium III	2.73861e-08			kilogram	air	biosphere
Copper ion	1.38684e-07			kilogram	air	biosphere
Dioxins, measured as 2,3,7,8-tetrachlorodibenzo-p-dioxin	6.35767e-14			kilogram	air	biosphere
Heat, waste	0.204696			megajoule	air	biosphere
Iron ion	4.115e-05			kilogram	air	biosphere
Lead II	4.08167e-07			kilogram	air	biosphere
Manganese II	6.84105e-07			kilogram	air	biosphere
Nitrogen oxides	2.12368e-05			kilogram	air	biosphere
PAH, polycyclic aromatic hydrocarbons	1e-08			kilogram	air	biosphere
Particulate Matter, < 2.5 um	4.47437e-05			kilogram	air	biosphere
Water	0.00611841			cubic meter	air	biosphere
Water	5.00963e-06			cubic meter	air::non-urban air or from high stacks	biosphere
Water, cooling, unspecified natural origin	0.00577581			cubic meter	natural resource::in water	biosphere
Water, unspecified natural origin	2.50482e-05			cubic meter	natural resource::in water	biosphere
steel production, converter, low-alloyed, 2025	1	steel_prod_SSP1-NDC	World	kilogram		production	steel, low-alloyed
blast furnace gas, Recycled Content cut-off	-0.0304027	remind - SSP1-NDC - 2025	GLO	megajoule		technosphere	blast furnace gas
carbon dioxide, captured at steel production plant, with underground storage, post, 200 km	6.48062e-05	remind - SSP1-NDC - 2025	World	kilogram		technosphere	carbon dioxide, captured and stored
market for aluminium, wrought alloy	8.78501e-05	remind - SSP1-NDC - 2025	GLO	kilogram		technosphere	aluminium, wrought alloy
market for argon, liquid	0.000116964	remind - SSP1-NDC - 2025	RoW	kilogram		technosphere	argon, liquid
market for basic oxygen furnace dust	-0.019396	remind - SSP1-NDC - 2025	RoW	kilogram		technosphere	basic oxygen furnace dust
market for basic oxygen furnace secondary metallurgy slag	-0.0003008	remind - SSP1-NDC - 2025	RoW	kilogram		technosphere	basic oxygen furnace secondary metallurgy slag
market for basic oxygen furnace slag	-0.104898	remind - SSP1-NDC - 2025	RoW	kilogram		technosphere	basic oxygen furnace slag
market for basic oxygen furnace sludge	-0.0003008	remind - SSP1-NDC - 2025	RoW	kilogram		technosphere	basic oxygen furnace sludge
market for basic oxygen furnace waste	-0.00335064	remind - SSP1-NDC - 2025	GLO	kilogram		technosphere	basic oxygen furnace waste
market for blast oxygen furnace converter	1.3333e-11	remind - SSP1-NDC - 2025	GLO	unit		technosphere	blast oxygen furnace converter
market for calcium carbide, technical grade	0.000190693	remind - SSP1-NDC - 2025	RoW	kilogram		technosphere	calcium carbide, technical grade
market for coke	0.000183216	remind - SSP1-NDC - 2025	GLO	megajoule		technosphere	coke
market for compressed air, 600 kPa gauge	0.0144222	remind - SSP1-NDC - 2025	RoW	cubic meter		technosphere	compressed air, 600 kPa gauge
market for copper, cathode	7.98637e-07	remind - SSP1-NDC - 2025	GLO	kilogram		technosphere	copper, cathode
market for diesel	2.90413e-06	remind - SSP1-NDC - 2025	RoW	kilogram		technosphere	diesel
market for dolomite	0.00442218	remind - SSP1-NDC - 2025	RoW	kilogram		technosphere	dolomite
market for electricity, medium voltage	0.000576605	remind - SSP1-NDC - 2025	VN	kilowatt hour		technosphere	electricity, medium voltage
market for electricity, medium voltage	1.27593e-05	remind - SSP1-NDC - 2025	CY	kilowatt hour		technosphere	electricity, medium voltage
market for electricity, medium voltage	0.000163672	remind - SSP1-NDC - 2025	UZ	kilowatt hour		technosphere	electricity, medium voltage
market for electricity, medium voltage	4.56929e-05	remind - SSP1-NDC - 2025	TJ	kilowatt hour		technosphere	electricity, medium voltage
market for electricity, medium voltage	0.000473443	remind - SSP1-NDC - 2025	ID	kilowatt hour		technosphere	electricity, medium voltage
market for electricity, medium voltage	3.82103e-05	remind - SSP1-NDC - 2025	KG	kilowatt hour		technosphere	electricity, medium voltage
market for electricity, medium voltage	0.000297532	remind - SSP1-NDC - 2025	TH	kilowatt hour		technosphere	electricity, medium voltage
market for electricity, medium voltage	0.000261098	remind - SSP1-NDC - 2025	PH	kilowatt hour		technosphere	electricity, medium voltage
market for electricity, medium voltage	4.8956e-06	remind - SSP1-NDC - 2025	QA	kilowatt hour		technosphere	electricity, medium voltage
market for electricity, medium voltage	3.00521e-05	remind - SSP1-NDC - 2025	KH	kilowatt hour		technosphere	electricity, medium voltage
market for electricity, medium voltage	0.000122021	remind - SSP1-NDC - 2025	SG	kilowatt hour		technosphere	electricity, medium voltage
market for electricity, medium voltage	0.00141139	remind - SSP1-NDC - 2025	KR	kilowatt hour		technosphere	electricity, medium voltage
market for electricity, medium voltage	0.000596764	remind - SSP1-NDC - 2025	TW	kilowatt hour		technosphere	electricity, medium voltage
market for electricity, medium voltage	0.000113291	remind - SSP1-NDC - 2025	NZ	kilowatt hour		technosphere	electricity, medium voltage
market for electricity, medium voltage	3.03323e-05	remind - SSP1-NDC - 2025	GE	kilowatt hour		technosphere	electricity, medium voltage
market for electricity, medium voltage	3.67822e-05	remind - SSP1-NDC - 2025	LB	kilowatt hour		technosphere	electricity, medium voltage
market for electricity, medium voltage	0.000154597	remind - SSP1-NDC - 2025	IL	kilowatt hour		technosphere	electricity, medium voltage
market for electricity, medium voltage	4.60361e-05	remind - SSP1-NDC - 2025	TM	kilowatt hour		technosphere	electricity, medium voltage
market for electricity, medium voltage	5.75519e-05	remind - SSP1-NDC - 2025	MM	kilowatt hour		technosphere	electricity, medium voltage
market for electricity, medium voltage	6.44113e-06	remind - SSP1-NDC - 2025	YE	kilowatt hour		technosphere	electricity, medium voltage
market for electricity, medium voltage	0.000329828	remind - SSP1-NDC - 2025	PK	kilowatt hour		technosphere	electricity, medium voltage
market for electricity, medium voltage	1.69109e-05	remind - SSP1-NDC - 2025	AM	kilowatt hour		technosphere	electricity, medium voltage
market for electricity, medium voltage	5.63004e-05	remind - SSP1-NDC - 2025	AZ	kilowatt hour		technosphere	electricity, medium voltage
market for electricity, medium voltage	0.00069025	remind - SSP1-NDC - 2025	TR	kilowatt hour		technosphere	electricity, medium voltage
market for electricity, medium voltage	0.000184784	remind - SSP1-NDC - 2025	BD	kilowatt hour		technosphere	electricity, medium voltage
market for electricity, medium voltage	3.88544e-05	remind - SSP1-NDC - 2025	SY	kilowatt hour		technosphere	electricity, medium voltage
market for electricity, medium voltage	4.76386e-05	remind - SSP1-NDC - 2025	BH	kilowatt hour		technosphere	electricity, medium voltage
market for electricity, medium voltage	3.85723e-05	remind - SSP1-NDC - 2025	LK	kilowatt hour		technosphere	electricity, medium voltage
market for electricity, medium voltage	4.33284e-05	remind - SSP1-NDC - 2025	JO	kilowatt hour		technosphere	electricity, medium voltage
market for electricity, medium voltage	0.00225931	remind - SSP1-NDC - 2025	JP	kilowatt hour		technosphere	electricity, medium voltage
market for electricity, medium voltage	3.42881e-05	remind - SSP1-NDC - 2025	KP	kilowatt hour		technosphere	electricity, medium voltage
market for electricity, medium voltage	9.95727e-06	remind - SSP1-NDC - 2025	BN	kilowatt hour		technosphere	electricity, medium voltage
market for electricity, medium voltage	2.14721e-05	remind - SSP1-NDC - 2025	MN	kilowatt hour		technosphere	electricity, medium voltage
market for electricity, medium voltage	9.51554e-05	remind - SSP1-NDC - 2025	OM	kilowatt hour		technosphere	electricity, medium voltage
market for electricity, medium voltage	0.000262526	remind - SSP1-NDC - 2025	KZ	kilowatt hour		technosphere	electricity, medium voltage
market for electricity, medium voltage	0.000128484	remind - SSP1-NDC - 2025	HK	kilowatt hour		technosphere	electricity, medium voltage
market for electricity, medium voltage	1.96652e-05	remind - SSP1-NDC - 2025	NP	kilowatt hour		technosphere	electricity, medium voltage
market for electricity, medium voltage	0.000578056	remind - SSP1-NDC - 2025	AU	kilowatt hour		technosphere	electricity, medium voltage
market for electricity, medium voltage	0.000423819	remind - SSP1-NDC - 2025	MY	kilowatt hour		technosphere	electricity, medium voltage
market for electrode, negative, Ni	5.19114e-06	remind - SSP1-NDC - 2025	GLO	kilogram		technosphere	electrode, negative, Ni
market for ferromanganese, high-coal, 74.5% Mn	0.015278	remind - SSP1-NDC - 2025	GLO	kilogram		technosphere	ferromanganese, high-coal, 74.5% Mn
market for ferronickel	0.045	remind - SSP1-NDC - 2025	GLO	kilogram		technosphere	ferronickel
market for ferrosilicon	7.61609e-06	remind - SSP1-NDC - 2025	GLO	kilogram		technosphere	ferrosilicon
market for inert waste, for final disposal	-0.000565685	remind - SSP1-NDC - 2025	RoW	kilogram		technosphere	inert waste, for final disposal
market for iron ore concentrate	0.000622896	remind - SSP1-NDC - 2025	GLO	kilogram		technosphere	iron ore concentrate
market for iron scrap, sorted, pressed	0.198865	remind - SSP1-NDC - 2025	RoW	kilogram		technosphere	iron scrap, sorted, pressed
market for lime	0.00230153	remind - SSP1-NDC - 2025	RoW	kilogram		technosphere	lime
market for liquefied petroleum gas	1.06037e-05	remind - SSP1-NDC - 2025	RoW	kilogram		technosphere	liquefied petroleum gas
market for manganese	2.03289e-05	remind - SSP1-NDC - 2025	GLO	kilogram		technosphere	manganese
market for mill scale	-6.63e-05	remind - SSP1-NDC - 2025	RoW	kilogram		technosphere	mill scale
market for molybdenite	0.00059649	remind - SSP1-NDC - 2025	GLO	kilogram		technosphere	molybdenite
market for natural gas, high pressure	0.00120219	remind - SSP1-NDC - 2025	RoW	cubic meter		technosphere	natural gas, high pressure
market for nickel, class 1	5.83731e-07	remind - SSP1-NDC - 2025	GLO	kilogram		technosphere	nickel, class 1
market for nitrogen, liquid	0.00162595	remind - SSP1-NDC - 2025	RoW	kilogram		technosphere	nitrogen, liquid
market for oxygen, liquid	0.078054	remind - SSP1-NDC - 2025	World	kilogram		technosphere	oxygen, liquid
market for pig iron	0.867945	remind - SSP1-NDC - 2025	World	kilogram		technosphere	pig iron
market for propane	1.25241e-05	remind - SSP1-NDC - 2025	GLO	kilogram		technosphere	propane
market for quicklime, in pieces, loose	0.044833	remind - SSP1-NDC - 2025	RoW	kilogram		technosphere	quicklime, in pieces, loose
market for sponge iron	0.000780486	remind - SSP1-NDC - 2025	GLO	kilogram		technosphere	sponge iron
market for steam, in chemical industry	0.000366647	remind - SSP1-NDC - 2025	RoW	kilogram		technosphere	steam, in chemical industry
market for wastewater from pig iron production	-0.00134164	remind - SSP1-NDC - 2025	RoW	cubic meter		technosphere	wastewater from pig iron production
market for wastewater from pig iron production	-2.00385e-05	remind - SSP1-NDC - 2025	RoW	cubic meter		technosphere	wastewater from pig iron production
market group for electricity, medium voltage	0.00215756	remind - SSP1-NDC - 2025	RME	kilowatt hour		technosphere	electricity, medium voltage
market group for electricity, medium voltage	0.00380426	remind - SSP1-NDC - 2025	RLA	kilowatt hour		technosphere	electricity, medium voltage
market group for electricity, medium voltage	0.0201787	remind - SSP1-NDC - 2025	CN	kilowatt hour		technosphere	electricity, medium voltage
market group for electricity, medium voltage	0.0121919	remind - SSP1-NDC - 2025	RNA	kilowatt hour		technosphere	electricity, medium voltage
market group for electricity, medium voltage	0.00190922	remind - SSP1-NDC - 2025	RAF	kilowatt hour		technosphere	electricity, medium voltage
Activity	steel production, converter, low-alloyed, 2030
code	bfd975d039134b5c88e684426d0fa6a1
comment	This dataset has been modified by `premise`, according to the performance for steel production indicated by the IAM model REMIND for the IAM region World in 2100, following the scenario SSP1-NDC. The energy efficiency of the process has been improved by 12%."Background: This activity represents the production of primary low-alloyed steel in a basic oxygen furnace (BOF), a discontinuous process in…
location	World
reference product	steel, low-alloyed
scenario	SSP1-NDC
type	process
unit	kilogram
worksheet name	steel_prod_SSP1-NDC
year	2030
Exchanges
name	amount	database	location	unit	categories	type	reference product
Carbon dioxide, fossil	0.0626236			kilogram	air	biosphere
Carbon dioxide, non-fossil	2.04331e-05			kilogram	air	biosphere
Carbon monoxide, fossil	0.00168214			kilogram	air	biosphere
Chromium III	2.73861e-08			kilogram	air	biosphere
Copper ion	1.38684e-07			kilogram	air	biosphere
Dioxins, measured as 2,3,7,8-tetrachlorodibenzo-p-dioxin	6.35767e-14			kilogram	air	biosphere
Heat, waste	0.204696			megajoule	air	biosphere
Iron ion	4.115e-05			kilogram	air	biosphere
Lead II	4.08167e-07			kilogram	air	biosphere
Manganese II	6.84105e-07			kilogram	air	biosphere
Nitrogen oxides	2.12368e-05			kilogram	air	biosphere
PAH, polycyclic aromatic hydrocarbons	1e-08			kilogram	air	biosphere
Particulate Matter, < 2.5 um	4.47437e-05			kilogram	air	biosphere
Water	0.00611841			cubic meter	air	biosphere
Water	5.00963e-06			cubic meter	air::non-urban air or from high stacks	biosphere
Water, cooling, unspecified natural origin	0.00577581			cubic meter	natural resource::in water	biosphere
Water, unspecified natural origin	2.50482e-05			cubic meter	natural resource::in water	biosphere
steel production, converter, low-alloyed, 2030	1	steel_prod_SSP1-NDC	World	kilogram		production	steel, low-alloyed
blast furnace gas, Recycled Content cut-off	-0.0304027	remind - SSP1-NDC - 2030	GLO	megajoule		technosphere	blast furnace gas
carbon dioxide, captured at steel production plant, with underground storage, post, 200 km	6.48062e-05	remind - SSP1-NDC - 2030	World	kilogram		technosphere	carbon dioxide, captured and stored
market for aluminium, wrought alloy	8.78501e-05	remind - SSP1-NDC - 2030	GLO	kilogram		technosphere	aluminium, wrought alloy
market for argon, liquid	0.000116964	remind - SSP1-NDC - 2030	RoW	kilogram		technosphere	argon, liquid
market for basic oxygen furnace dust	-0.019396	remind - SSP1-NDC - 2030	RoW	kilogram		technosphere	basic oxygen furnace dust
market for basic oxygen furnace secondary metallurgy slag	-0.0003008	remind - SSP1-NDC - 2030	RoW	kilogram		technosphere	basic oxygen furnace secondary metallurgy slag
market for basic oxygen furnace slag	-0.104898	remind - SSP1-NDC - 2030	RoW	kilogram		technosphere	basic oxygen furnace slag
market for basic oxygen furnace sludge	-0.0003008	remind - SSP1-NDC - 2030	RoW	kilogram		technosphere	basic oxygen furnace sludge
market for basic oxygen furnace waste	-0.00335064	remind - SSP1-NDC - 2030	GLO	kilogram		technosphere	basic oxygen furnace waste
market for blast oxygen furnace converter	1.3333e-11	remind - SSP1-NDC - 2030	GLO	unit		technosphere	blast oxygen furnace converter
market for calcium carbide, technical grade	0.000190693	remind - SSP1-NDC - 2030	RoW	kilogram		technosphere	calcium carbide, technical grade
market for coke	0.000183216	remind - SSP1-NDC - 2030	GLO	megajoule		technosphere	coke
market for compressed air, 600 kPa gauge	0.0144222	remind - SSP1-NDC - 2030	RoW	cubic meter		technosphere	compressed air, 600 kPa gauge
market for copper, cathode	7.98637e-07	remind - SSP1-NDC - 2030	GLO	kilogram		technosphere	copper, cathode
market for diesel	2.90413e-06	remind - SSP1-NDC - 2030	RoW	kilogram		technosphere	diesel
market for dolomite	0.00442218	remind - SSP1-NDC - 2030	RoW	kilogram		technosphere	dolomite
market for electricity, medium voltage	0.000576605	remind - SSP1-NDC - 2030	VN	kilowatt hour		technosphere	electricity, medium voltage
market for electricity, medium voltage	1.27593e-05	remind - SSP1-NDC - 2030	CY	kilowatt hour		technosphere	electricity, medium voltage
market for electricity, medium voltage	0.000163672	remind - SSP1-NDC - 2030	UZ	kilowatt hour		technosphere	electricity, medium voltage
market for electricity, medium voltage	4.56929e-05	remind - SSP1-NDC - 2030	TJ	kilowatt hour		technosphere	electricity, medium voltage
market for electricity, medium voltage	0.000473443	remind - SSP1-NDC - 2030	ID	kilowatt hour		technosphere	electricity, medium voltage
market for electricity, medium voltage	3.82103e-05	remind - SSP1-NDC - 2030	KG	kilowatt hour		technosphere	electricity, medium voltage
market for electricity, medium voltage	0.000297532	remind - SSP1-NDC - 2030	TH	kilowatt hour		technosphere	electricity, medium voltage
market for electricity, medium voltage	0.000261098	remind - SSP1-NDC - 2030	PH	kilowatt hour		technosphere	electricity, medium voltage
market for electricity, medium voltage	4.8956e-06	remind - SSP1-NDC - 2030	QA	kilowatt hour		technosphere	electricity, medium voltage
market for electricity, medium voltage	3.00521e-05	remind - SSP1-NDC - 2030	KH	kilowatt hour		technosphere	electricity, medium voltage
market for electricity, medium voltage	0.000122021	remind - SSP1-NDC - 2030	SG	kilowatt hour		technosphere	electricity, medium voltage
market for electricity, medium voltage	0.00141139	remind - SSP1-NDC - 2030	KR	kilowatt hour		technosphere	electricity, medium voltage
market for electricity, medium voltage	0.000596764	remind - SSP1-NDC - 2030	TW	kilowatt hour		technosphere	electricity, medium voltage
market for electricity, medium voltage	0.000113291	remind - SSP1-NDC - 2030	NZ	kilowatt hour		technosphere	electricity, medium voltage
market for electricity, medium voltage	3.03323e-05	remind - SSP1-NDC - 2030	GE	kilowatt hour		technosphere	electricity, medium voltage
market for electricity, medium voltage	3.67822e-05	remind - SSP1-NDC - 2030	LB	kilowatt hour		technosphere	electricity, medium voltage
market for electricity, medium voltage	0.000154597	remind - SSP1-NDC - 2030	IL	kilowatt hour		technosphere	electricity, medium voltage
market for electricity, medium voltage	4.60361e-05	remind - SSP1-NDC - 2030	TM	kilowatt hour		technosphere	electricity, medium voltage
market for electricity, medium voltage	5.75519e-05	remind - SSP1-NDC - 2030	MM	kilowatt hour		technosphere	electricity, medium voltage
market for electricity, medium voltage	6.44113e-06	remind - SSP1-NDC - 2030	YE	kilowatt hour		technosphere	electricity, medium voltage
market for electricity, medium voltage	0.000329828	remind - SSP1-NDC - 2030	PK	kilowatt hour		technosphere	electricity, medium voltage
market for electricity, medium voltage	1.69109e-05	remind - SSP1-NDC - 2030	AM	kilowatt hour		technosphere	electricity, medium voltage
market for electricity, medium voltage	5.63004e-05	remind - SSP1-NDC - 2030	AZ	kilowatt hour		technosphere	electricity, medium voltage
market for electricity, medium voltage	0.00069025	remind - SSP1-NDC - 2030	TR	kilowatt hour		technosphere	electricity, medium voltage
market for electricity, medium voltage	0.000184784	remind - SSP1-NDC - 2030	BD	kilowatt hour		technosphere	electricity, medium voltage
market for electricity, medium voltage	3.88544e-05	remind - SSP1-NDC - 2030	SY	kilowatt hour		technosphere	electricity, medium voltage
market for electricity, medium voltage	4.76386e-05	remind - SSP1-NDC - 2030	BH	kilowatt hour		technosphere	electricity, medium voltage
market for electricity, medium voltage	3.85723e-05	remind - SSP1-NDC - 2030	LK	kilowatt hour		technosphere	electricity, medium voltage
market for electricity, medium voltage	4.33284e-05	remind - SSP1-NDC - 2030	JO	kilowatt hour		technosphere	electricity, medium voltage
market for electricity, medium voltage	0.00225931	remind - SSP1-NDC - 2030	JP	kilowatt hour		technosphere	electricity, medium voltage
market for electricity, medium voltage	3.42881e-05	remind - SSP1-NDC - 2030	KP	kilowatt hour		technosphere	electricity, medium voltage
market for electricity, medium voltage	9.95727e-06	remind - SSP1-NDC - 2030	BN	kilowatt hour		technosphere	electricity, medium voltage
market for electricity, medium voltage	2.14721e-05	remind - SSP1-NDC - 2030	MN	kilowatt hour		technosphere	electricity, medium voltage
market for electricity, medium voltage	9.51554e-05	remind - SSP1-NDC - 2030	OM	kilowatt hour		technosphere	electricity, medium voltage
market for electricity, medium voltage	0.000262526	remind - SSP1-NDC - 2030	KZ	kilowatt hour		technosphere	electricity, medium voltage
market for electricity, medium voltage	0.000128484	remind - SSP1-NDC - 2030	HK	kilowatt hour		technosphere	electricity, medium voltage
market for electricity, medium voltage	1.96652e-05	remind - SSP1-NDC - 2030	NP	kilowatt hour		technosphere	electricity, medium voltage
market for electricity, medium voltage	0.000578056	remind - SSP1-NDC - 2030	AU	kilowatt hour		technosphere	electricity, medium voltage
market for electricity, medium voltage	0.000423819	remind - SSP1-NDC - 2030	MY	kilowatt hour		technosphere	electricity, medium voltage
market for electrode, negative, Ni	5.19114e-06	remind - SSP1-NDC - 2030	GLO	kilogram		technosphere	electrode, negative, Ni
market for ferromanganese, high-coal, 74.5% Mn	0.015278	remind - SSP1-NDC - 2030	GLO	kilogram		technosphere	ferromanganese, high-coal, 74.5% Mn
market for ferronickel	0.045	remind - SSP1-NDC - 2030	GLO	kilogram		technosphere	ferronickel
market for ferrosilicon	7.61609e-06	remind - SSP1-NDC - 2030	GLO	kilogram		technosphere	ferrosilicon
market for inert waste, for final disposal	-0.000565685	remind - SSP1-NDC - 2030	RoW	kilogram		technosphere	inert waste, for final disposal
market for iron ore concentrate	0.000622896	remind - SSP1-NDC - 2030	GLO	kilogram		technosphere	iron ore concentrate
market for iron scrap, sorted, pressed	0.198865	remind - SSP1-NDC - 2030	RoW	kilogram		technosphere	iron scrap, sorted, pressed
market for lime	0.00230153	remind - SSP1-NDC - 2030	RoW	kilogram		technosphere	lime
market for liquefied petroleum gas	1.06037e-05	remind - SSP1-NDC - 2030	RoW	kilogram		technosphere	liquefied petroleum gas
market for manganese	2.03289e-05	remind - SSP1-NDC - 2030	GLO	kilogram		technosphere	manganese
market for mill scale	-6.63e-05	remind - SSP1-NDC - 2030	RoW	kilogram		technosphere	mill scale
market for molybdenite	0.00059649	remind - SSP1-NDC - 2030	GLO	kilogram		technosphere	molybdenite
market for natural gas, high pressure	0.00120219	remind - SSP1-NDC - 2030	RoW	cubic meter		technosphere	natural gas, high pressure
market for nickel, class 1	5.83731e-07	remind - SSP1-NDC - 2030	GLO	kilogram		technosphere	nickel, class 1
market for nitrogen, liquid	0.00162595	remind - SSP1-NDC - 2030	RoW	kilogram		technosphere	nitrogen, liquid
market for oxygen, liquid	0.078054	remind - SSP1-NDC - 2030	World	kilogram		technosphere	oxygen, liquid
market for pig iron	0.867945	remind - SSP1-NDC - 2030	World	kilogram		technosphere	pig iron
market for propane	1.25241e-05	remind - SSP1-NDC - 2030	GLO	kilogram		technosphere	propane
market for quicklime, in pieces, loose	0.044833	remind - SSP1-NDC - 2030	RoW	kilogram		technosphere	quicklime, in pieces, loose
market for sponge iron	0.000780486	remind - SSP1-NDC - 2030	GLO	kilogram		technosphere	sponge iron
market for steam, in chemical industry	0.000366647	remind - SSP1-NDC - 2030	RoW	kilogram		technosphere	steam, in chemical industry
market for wastewater from pig iron production	-0.00134164	remind - SSP1-NDC - 2030	RoW	cubic meter		technosphere	wastewater from pig iron production
market for wastewater from pig iron production	-2.00385e-05	remind - SSP1-NDC - 2030	RoW	cubic meter		technosphere	wastewater from pig iron production
market group for electricity, medium voltage	0.00215756	remind - SSP1-NDC - 2030	RME	kilowatt hour		technosphere	electricity, medium voltage
market group for electricity, medium voltage	0.00380426	remind - SSP1-NDC - 2030	RLA	kilowatt hour		technosphere	electricity, medium voltage
market group for electricity, medium voltage	0.0201787	remind - SSP1-NDC - 2030	CN	kilowatt hour		technosphere	electricity, medium voltage
market group for electricity, medium voltage	0.0121919	remind - SSP1-NDC - 2030	RNA	kilowatt hour		technosphere	electricity, medium voltage
market group for electricity, medium voltage	0.00190922	remind - SSP1-NDC - 2030	RAF	kilowatt hour		technosphere	electricity, medium voltage
Activity	steel production, converter, low-alloyed, 2035
code	a88e50ce92a6466180a60c1c808b088b
comment	This dataset has been modified by `premise`, according to the performance for steel production indicated by the IAM model REMIND for the IAM region World in 2100, following the scenario SSP1-NDC. The energy efficiency of the process has been improved by 12%."Background: This activity represents the production of primary low-alloyed steel in a basic oxygen furnace (BOF), a discontinuous process in…
location	World
reference product	steel, low-alloyed
scenario	SSP1-NDC
type	process
unit	kilogram
worksheet name	steel_prod_SSP1-NDC
year	2035
Exchanges
name	amount	database	location	unit	categories	type	reference product
Carbon dioxide, fossil	0.0626236			kilogram	air	biosphere
Carbon dioxide, non-fossil	2.04331e-05			kilogram	air	biosphere
Carbon monoxide, fossil	0.00168214			kilogram	air	biosphere
Chromium III	2.73861e-08			kilogram	air	biosphere
Copper ion	1.38684e-07			kilogram	air	biosphere
Dioxins, measured as 2,3,7,8-tetrachlorodibenzo-p-dioxin	6.35767e-14			kilogram	air	biosphere
Heat, waste	0.204696			megajoule	air	biosphere
Iron ion	4.115e-05			kilogram	air	biosphere
Lead II	4.08167e-07			kilogram	air	biosphere
Manganese II	6.84105e-07			kilogram	air	biosphere
Nitrogen oxides	2.12368e-05			kilogram	air	biosphere
PAH, polycyclic aromatic hydrocarbons	1e-08			kilogram	air	biosphere
Particulate Matter, < 2.5 um	4.47437e-05			kilogram	air	biosphere
Water	0.00611841			cubic meter	air	biosphere
Water	5.00963e-06			cubic meter	air::non-urban air or from high stacks	biosphere
Water, cooling, unspecified natural origin	0.00577581			cubic meter	natural resource::in water	biosphere
Water, unspecified natural origin	2.50482e-05			cubic meter	natural resource::in water	biosphere
steel production, converter, low-alloyed, 2035	1	steel_prod_SSP1-NDC	World	kilogram		production	steel, low-alloyed
blast furnace gas, Recycled Content cut-off	-0.0304027	remind - SSP1-NDC - 2035	GLO	megajoule		technosphere	blast furnace gas
carbon dioxide, captured at steel production plant, with underground storage, post, 200 km	6.48062e-05	remind - SSP1-NDC - 2035	World	kilogram		technosphere	carbon dioxide, captured and stored
market for aluminium, wrought alloy	8.78501e-05	remind - SSP1-NDC - 2035	GLO	kilogram		technosphere	aluminium, wrought alloy
market for argon, liquid	0.000116964	remind - SSP1-NDC - 2035	RoW	kilogram		technosphere	argon, liquid
market for basic oxygen furnace dust	-0.019396	remind - SSP1-NDC - 2035	RoW	kilogram		technosphere	basic oxygen furnace dust
market for basic oxygen furnace secondary metallurgy slag	-0.0003008	remind - SSP1-NDC - 2035	RoW	kilogram		technosphere	basic oxygen furnace secondary metallurgy slag
market for basic oxygen furnace slag	-0.104898	remind - SSP1-NDC - 2035	RoW	kilogram		technosphere	basic oxygen furnace slag
market for basic oxygen furnace sludge	-0.0003008	remind - SSP1-NDC - 2035	RoW	kilogram		technosphere	basic oxygen furnace sludge
market for basic oxygen furnace waste	-0.00335064	remind - SSP1-NDC - 2035	GLO	kilogram		technosphere	basic oxygen furnace waste
market for blast oxygen furnace converter	1.3333e-11	remind - SSP1-NDC - 2035	GLO	unit		technosphere	blast oxygen furnace converter
market for calcium carbide, technical grade	0.000190693	remind - SSP1-NDC - 2035	RoW	kilogram		technosphere	calcium carbide, technical grade
market for coke	0.000183216	remind - SSP1-NDC - 2035	GLO	megajoule		technosphere	coke
market for compressed air, 600 kPa gauge	0.0144222	remind - SSP1-NDC - 2035	RoW	cubic meter		technosphere	compressed air, 600 kPa gauge
market for copper, cathode	7.98637e-07	remind - SSP1-NDC - 2035	GLO	kilogram		technosphere	copper, cathode
market for diesel	2.90413e-06	remind - SSP1-NDC - 2035	RoW	kilogram		technosphere	diesel
market for dolomite	0.00442218	remind - SSP1-NDC - 2035	RoW	kilogram		technosphere	dolomite
market for electricity, medium voltage	0.000576605	remind - SSP1-NDC - 2035	VN	kilowatt hour		technosphere	electricity, medium voltage
market for electricity, medium voltage	1.27593e-05	remind - SSP1-NDC - 2035	CY	kilowatt hour		technosphere	electricity, medium voltage
market for electricity, medium voltage	0.000163672	remind - SSP1-NDC - 2035	UZ	kilowatt hour		technosphere	electricity, medium voltage
market for electricity, medium voltage	4.56929e-05	remind - SSP1-NDC - 2035	TJ	kilowatt hour		technosphere	electricity, medium voltage
market for electricity, medium voltage	0.000473443	remind - SSP1-NDC - 2035	ID	kilowatt hour		technosphere	electricity, medium voltage
market for electricity, medium voltage	3.82103e-05	remind - SSP1-NDC - 2035	KG	kilowatt hour		technosphere	electricity, medium voltage
market for electricity, medium voltage	0.000297532	remind - SSP1-NDC - 2035	TH	kilowatt hour		technosphere	electricity, medium voltage
market for electricity, medium voltage	0.000261098	remind - SSP1-NDC - 2035	PH	kilowatt hour		technosphere	electricity, medium voltage
market for electricity, medium voltage	4.8956e-06	remind - SSP1-NDC - 2035	QA	kilowatt hour		technosphere	electricity, medium voltage
market for electricity, medium voltage	3.00521e-05	remind - SSP1-NDC - 2035	KH	kilowatt hour		technosphere	electricity, medium voltage
market for electricity, medium voltage	0.000122021	remind - SSP1-NDC - 2035	SG	kilowatt hour		technosphere	electricity, medium voltage
market for electricity, medium voltage	0.00141139	remind - SSP1-NDC - 2035	KR	kilowatt hour		technosphere	electricity, medium voltage
market for electricity, medium voltage	0.000596764	remind - SSP1-NDC - 2035	TW	kilowatt hour		technosphere	electricity, medium voltage
market for electricity, medium voltage	0.000113291	remind - SSP1-NDC - 2035	NZ	kilowatt hour		technosphere	electricity, medium voltage
market for electricity, medium voltage	3.03323e-05	remind - SSP1-NDC - 2035	GE	kilowatt hour		technosphere	electricity, medium voltage
market for electricity, medium voltage	3.67822e-05	remind - SSP1-NDC - 2035	LB	kilowatt hour		technosphere	electricity, medium voltage
market for electricity, medium voltage	0.000154597	remind - SSP1-NDC - 2035	IL	kilowatt hour		technosphere	electricity, medium voltage
market for electricity, medium voltage	4.60361e-05	remind - SSP1-NDC - 2035	TM	kilowatt hour		technosphere	electricity, medium voltage
market for electricity, medium voltage	5.75519e-05	remind - SSP1-NDC - 2035	MM	kilowatt hour		technosphere	electricity, medium voltage
market for electricity, medium voltage	6.44113e-06	remind - SSP1-NDC - 2035	YE	kilowatt hour		technosphere	electricity, medium voltage
market for electricity, medium voltage	0.000329828	remind - SSP1-NDC - 2035	PK	kilowatt hour		technosphere	electricity, medium voltage
market for electricity, medium voltage	1.69109e-05	remind - SSP1-NDC - 2035	AM	kilowatt hour		technosphere	electricity, medium voltage
market for electricity, medium voltage	5.63004e-05	remind - SSP1-NDC - 2035	AZ	kilowatt hour		technosphere	electricity, medium voltage
market for electricity, medium voltage	0.00069025	remind - SSP1-NDC - 2035	TR	kilowatt hour		technosphere	electricity, medium voltage
market for electricity, medium voltage	0.000184784	remind - SSP1-NDC - 2035	BD	kilowatt hour		technosphere	electricity, medium voltage
market for electricity, medium voltage	3.88544e-05	remind - SSP1-NDC - 2035	SY	kilowatt hour		technosphere	electricity, medium voltage
market for electricity, medium voltage	4.76386e-05	remind - SSP1-NDC - 2035	BH	kilowatt hour		technosphere	electricity, medium voltage
market for electricity, medium voltage	3.85723e-05	remind - SSP1-NDC - 2035	LK	kilowatt hour		technosphere	electricity, medium voltage
market for electricity, medium voltage	4.33284e-05	remind - SSP1-NDC - 2035	JO	kilowatt hour		technosphere	electricity, medium voltage
market for electricity, medium voltage	0.00225931	remind - SSP1-NDC - 2035	JP	kilowatt hour		technosphere	electricity, medium voltage
market for electricity, medium voltage	3.42881e-05	remind - SSP1-NDC - 2035	KP	kilowatt hour		technosphere	electricity, medium voltage
market for electricity, medium voltage	9.95727e-06	remind - SSP1-NDC - 2035	BN	kilowatt hour		technosphere	electricity, medium voltage
market for electricity, medium voltage	2.14721e-05	remind - SSP1-NDC - 2035	MN	kilowatt hour		technosphere	electricity, medium voltage
market for electricity, medium voltage	9.51554e-05	remind - SSP1-NDC - 2035	OM	kilowatt hour		technosphere	electricity, medium voltage
market for electricity, medium voltage	0.000262526	remind - SSP1-NDC - 2035	KZ	kilowatt hour		technosphere	electricity, medium voltage
market for electricity, medium voltage	0.000128484	remind - SSP1-NDC - 2035	HK	kilowatt hour		technosphere	electricity, medium voltage
market for electricity, medium voltage	1.96652e-05	remind - SSP1-NDC - 2035	NP	kilowatt hour		technosphere	electricity, medium voltage
market for electricity, medium voltage	0.000578056	remind - SSP1-NDC - 2035	AU	kilowatt hour		technosphere	electricity, medium voltage
market for electricity, medium voltage	0.000423819	remind - SSP1-NDC - 2035	MY	kilowatt hour		technosphere	electricity, medium voltage
market for electrode, negative, Ni	5.19114e-06	remind - SSP1-NDC - 2035	GLO	kilogram		technosphere	electrode, negative, Ni
market for ferromanganese, high-coal, 74.5% Mn	0.015278	remind - SSP1-NDC - 2035	GLO	kilogram		technosphere	ferromanganese, high-coal, 74.5% Mn
market for ferronickel	0.045	remind - SSP1-NDC - 2035	GLO	kilogram		technosphere	ferronickel
market for ferrosilicon	7.61609e-06	remind - SSP1-NDC - 2035	GLO	kilogram		technosphere	ferrosilicon
market for inert waste, for final disposal	-0.000565685	remind - SSP1-NDC - 2035	RoW	kilogram		technosphere	inert waste, for final disposal
market for iron ore concentrate	0.000622896	remind - SSP1-NDC - 2035	GLO	kilogram		technosphere	iron ore concentrate
market for iron scrap, sorted, pressed	0.198865	remind - SSP1-NDC - 2035	RoW	kilogram		technosphere	iron scrap, sorted, pressed
market for lime	0.00230153	remind - SSP1-NDC - 2035	RoW	kilogram		technosphere	lime
market for liquefied petroleum gas	1.06037e-05	remind - SSP1-NDC - 2035	RoW	kilogram		technosphere	liquefied petroleum gas
market for manganese	2.03289e-05	remind - SSP1-NDC - 2035	GLO	kilogram		technosphere	manganese
market for mill scale	-6.63e-05	remind - SSP1-NDC - 2035	RoW	kilogram		technosphere	mill scale
market for molybdenite	0.00059649	remind - SSP1-NDC - 2035	GLO	kilogram		technosphere	molybdenite
market for natural gas, high pressure	0.00120219	remind - SSP1-NDC - 2035	RoW	cubic meter		technosphere	natural gas, high pressure
market for nickel, class 1	5.83731e-07	remind - SSP1-NDC - 2035	GLO	kilogram		technosphere	nickel, class 1
market for nitrogen, liquid	0.00162595	remind - SSP1-NDC - 2035	RoW	kilogram		technosphere	nitrogen, liquid
market for oxygen, liquid	0.078054	remind - SSP1-NDC - 2035	World	kilogram		technosphere	oxygen, liquid
market for pig iron	0.867945	remind - SSP1-NDC - 2035	World	kilogram		technosphere	pig iron
market for propane	1.25241e-05	remind - SSP1-NDC - 2035	GLO	kilogram		technosphere	propane
market for quicklime, in pieces, loose	0.044833	remind - SSP1-NDC - 2035	RoW	kilogram		technosphere	quicklime, in pieces, loose
market for sponge iron	0.000780486	remind - SSP1-NDC - 2035	GLO	kilogram		technosphere	sponge iron
market for steam, in chemical industry	0.000366647	remind - SSP1-NDC - 2035	RoW	kilogram		technosphere	steam, in chemical industry
market for wastewater from pig iron production	-0.00134164	remind - SSP1-NDC - 2035	RoW	cubic meter		technosphere	wastewater from pig iron production
market for wastewater from pig iron production	-2.00385e-05	remind - SSP1-NDC - 2035	RoW	cubic meter		technosphere	wastewater from pig iron production
market group for electricity, medium voltage	0.00215756	remind - SSP1-NDC - 2035	RME	kilowatt hour		technosphere	electricity, medium voltage
market group for electricity, medium voltage	0.00380426	remind - SSP1-NDC - 2035	RLA	kilowatt hour		technosphere	electricity, medium voltage
market group for electricity, medium voltage	0.0201787	remind - SSP1-NDC - 2035	CN	kilowatt hour		technosphere	electricity, medium voltage
market group for electricity, medium voltage	0.0121919	remind - SSP1-NDC - 2035	RNA	kilowatt hour		technosphere	electricity, medium voltage
market group for electricity, medium voltage	0.00190922	remind - SSP1-NDC - 2035	RAF	kilowatt hour		technosphere	electricity, medium voltage
Activity	steel production, converter, low-alloyed, 2040
code	566eebd5e0b749e69581247d5bb3da61
comment	This dataset has been modified by `premise`, according to the performance for steel production indicated by the IAM model REMIND for the IAM region World in 2100, following the scenario SSP1-NDC. The energy efficiency of the process has been improved by 12%."Background: This activity represents the production of primary low-alloyed steel in a basic oxygen furnace (BOF), a discontinuous process in…
location	World
reference product	steel, low-alloyed
scenario	SSP1-NDC
type	process
unit	kilogram
worksheet name	steel_prod_SSP1-NDC
year	2040
Exchanges
name	amount	database	location	unit	categories	type	reference product
Carbon dioxide, fossil	0.0626236			kilogram	air	biosphere
Carbon dioxide, non-fossil	2.04331e-05			kilogram	air	biosphere
Carbon monoxide, fossil	0.00168214			kilogram	air	biosphere
Chromium III	2.73861e-08			kilogram	air	biosphere
Copper ion	1.38684e-07			kilogram	air	biosphere
Dioxins, measured as 2,3,7,8-tetrachlorodibenzo-p-dioxin	6.35767e-14			kilogram	air	biosphere
Heat, waste	0.204696			megajoule	air	biosphere
Iron ion	4.115e-05			kilogram	air	biosphere
Lead II	4.08167e-07			kilogram	air	biosphere
Manganese II	6.84105e-07			kilogram	air	biosphere
Nitrogen oxides	2.12368e-05			kilogram	air	biosphere
PAH, polycyclic aromatic hydrocarbons	1e-08			kilogram	air	biosphere
Particulate Matter, < 2.5 um	4.47437e-05			kilogram	air	biosphere
Water	0.00611841			cubic meter	air	biosphere
Water	5.00963e-06			cubic meter	air::non-urban air or from high stacks	biosphere
Water, cooling, unspecified natural origin	0.00577581			cubic meter	natural resource::in water	biosphere
Water, unspecified natural origin	2.50482e-05			cubic meter	natural resource::in water	biosphere
steel production, converter, low-alloyed, 2040	1	steel_prod_SSP1-NDC	World	kilogram		production	steel, low-alloyed
blast furnace gas, Recycled Content cut-off	-0.0304027	remind - SSP1-NDC - 2040	GLO	megajoule		technosphere	blast furnace gas
carbon dioxide, captured at steel production plant, with underground storage, post, 200 km	6.48062e-05	remind - SSP1-NDC - 2040	World	kilogram		technosphere	carbon dioxide, captured and stored
market for aluminium, wrought alloy	8.78501e-05	remind - SSP1-NDC - 2040	GLO	kilogram		technosphere	aluminium, wrought alloy
market for argon, liquid	0.000116964	remind - SSP1-NDC - 2040	RoW	kilogram		technosphere	argon, liquid
market for basic oxygen furnace dust	-0.019396	remind - SSP1-NDC - 2040	RoW	kilogram		technosphere	basic oxygen furnace dust
market for basic oxygen furnace secondary metallurgy slag	-0.0003008	remind - SSP1-NDC - 2040	RoW	kilogram		technosphere	basic oxygen furnace secondary metallurgy slag
market for basic oxygen furnace slag	-0.104898	remind - SSP1-NDC - 2040	RoW	kilogram		technosphere	basic oxygen furnace slag
market for basic oxygen furnace sludge	-0.0003008	remind - SSP1-NDC - 2040	RoW	kilogram		technosphere	basic oxygen furnace sludge
market for basic oxygen furnace waste	-0.00335064	remind - SSP1-NDC - 2040	GLO	kilogram		technosphere	basic oxygen furnace waste
market for blast oxygen furnace converter	1.3333e-11	remind - SSP1-NDC - 2040	GLO	unit		technosphere	blast oxygen furnace converter
market for calcium carbide, technical grade	0.000190693	remind - SSP1-NDC - 2040	RoW	kilogram		technosphere	calcium carbide, technical grade
market for coke	0.000183216	remind - SSP1-NDC - 2040	GLO	megajoule		technosphere	coke
market for compressed air, 600 kPa gauge	0.0144222	remind - SSP1-NDC - 2040	RoW	cubic meter		technosphere	compressed air, 600 kPa gauge
market for copper, cathode	7.98637e-07	remind - SSP1-NDC - 2040	GLO	kilogram		technosphere	copper, cathode
market for diesel	2.90413e-06	remind - SSP1-NDC - 2040	RoW	kilogram		technosphere	diesel
market for dolomite	0.00442218	remind - SSP1-NDC - 2040	RoW	kilogram		technosphere	dolomite
market for electricity, medium voltage	0.000576605	remind - SSP1-NDC - 2040	VN	kilowatt hour		technosphere	electricity, medium voltage
market for electricity, medium voltage	1.27593e-05	remind - SSP1-NDC - 2040	CY	kilowatt hour		technosphere	electricity, medium voltage
market for electricity, medium voltage	0.000163672	remind - SSP1-NDC - 2040	UZ	kilowatt hour		technosphere	electricity, medium voltage
market for electricity, medium voltage	4.56929e-05	remind - SSP1-NDC - 2040	TJ	kilowatt hour		technosphere	electricity, medium voltage
market for electricity, medium voltage	0.000473443	remind - SSP1-NDC - 2040	ID	kilowatt hour		technosphere	electricity, medium voltage
market for electricity, medium voltage	3.82103e-05	remind - SSP1-NDC - 2040	KG	kilowatt hour		technosphere	electricity, medium voltage
market for electricity, medium voltage	0.000297532	remind - SSP1-NDC - 2040	TH	kilowatt hour		technosphere	electricity, medium voltage
market for electricity, medium voltage	0.000261098	remind - SSP1-NDC - 2040	PH	kilowatt hour		technosphere	electricity, medium voltage
market for electricity, medium voltage	4.8956e-06	remind - SSP1-NDC - 2040	QA	kilowatt hour		technosphere	electricity, medium voltage
market for electricity, medium voltage	3.00521e-05	remind - SSP1-NDC - 2040	KH	kilowatt hour		technosphere	electricity, medium voltage
market for electricity, medium voltage	0.000122021	remind - SSP1-NDC - 2040	SG	kilowatt hour		technosphere	electricity, medium voltage
market for electricity, medium voltage	0.00141139	remind - SSP1-NDC - 2040	KR	kilowatt hour		technosphere	electricity, medium voltage
market for electricity, medium voltage	0.000596764	remind - SSP1-NDC - 2040	TW	kilowatt hour		technosphere	electricity, medium voltage
market for electricity, medium voltage	0.000113291	remind - SSP1-NDC - 2040	NZ	kilowatt hour		technosphere	electricity, medium voltage
market for electricity, medium voltage	3.03323e-05	remind - SSP1-NDC - 2040	GE	kilowatt hour		technosphere	electricity, medium voltage
market for electricity, medium voltage	3.67822e-05	remind - SSP1-NDC - 2040	LB	kilowatt hour		technosphere	electricity, medium voltage
market for electricity, medium voltage	0.000154597	remind - SSP1-NDC - 2040	IL	kilowatt hour		technosphere	electricity, medium voltage
market for electricity, medium voltage	4.60361e-05	remind - SSP1-NDC - 2040	TM	kilowatt hour		technosphere	electricity, medium voltage
market for electricity, medium voltage	5.75519e-05	remind - SSP1-NDC - 2040	MM	kilowatt hour		technosphere	electricity, medium voltage
market for electricity, medium voltage	6.44113e-06	remind - SSP1-NDC - 2040	YE	kilowatt hour		technosphere	electricity, medium voltage
market for electricity, medium voltage	0.000329828	remind - SSP1-NDC - 2040	PK	kilowatt hour		technosphere	electricity, medium voltage
market for electricity, medium voltage	1.69109e-05	remind - SSP1-NDC - 2040	AM	kilowatt hour		technosphere	electricity, medium voltage
market for electricity, medium voltage	5.63004e-05	remind - SSP1-NDC - 2040	AZ	kilowatt hour		technosphere	electricity, medium voltage
market for electricity, medium voltage	0.00069025	remind - SSP1-NDC - 2040	TR	kilowatt hour		technosphere	electricity, medium voltage
market for electricity, medium voltage	0.000184784	remind - SSP1-NDC - 2040	BD	kilowatt hour		technosphere	electricity, medium voltage
market for electricity, medium voltage	3.88544e-05	remind - SSP1-NDC - 2040	SY	kilowatt hour		technosphere	electricity, medium voltage
market for electricity, medium voltage	4.76386e-05	remind - SSP1-NDC - 2040	BH	kilowatt hour		technosphere	electricity, medium voltage
market for electricity, medium voltage	3.85723e-05	remind - SSP1-NDC - 2040	LK	kilowatt hour		technosphere	electricity, medium voltage
market for electricity, medium voltage	4.33284e-05	remind - SSP1-NDC - 2040	JO	kilowatt hour		technosphere	electricity, medium voltage
market for electricity, medium voltage	0.00225931	remind - SSP1-NDC - 2040	JP	kilowatt hour		technosphere	electricity, medium voltage
market for electricity, medium voltage	3.42881e-05	remind - SSP1-NDC - 2040	KP	kilowatt hour		technosphere	electricity, medium voltage
market for electricity, medium voltage	9.95727e-06	remind - SSP1-NDC - 2040	BN	kilowatt hour		technosphere	electricity, medium voltage
market for electricity, medium voltage	2.14721e-05	remind - SSP1-NDC - 2040	MN	kilowatt hour		technosphere	electricity, medium voltage
market for electricity, medium voltage	9.51554e-05	remind - SSP1-NDC - 2040	OM	kilowatt hour		technosphere	electricity, medium voltage
market for electricity, medium voltage	0.000262526	remind - SSP1-NDC - 2040	KZ	kilowatt hour		technosphere	electricity, medium voltage
market for electricity, medium voltage	0.000128484	remind - SSP1-NDC - 2040	HK	kilowatt hour		technosphere	electricity, medium voltage
market for electricity, medium voltage	1.96652e-05	remind - SSP1-NDC - 2040	NP	kilowatt hour		technosphere	electricity, medium voltage
market for electricity, medium voltage	0.000578056	remind - SSP1-NDC - 2040	AU	kilowatt hour		technosphere	electricity, medium voltage
market for electricity, medium voltage	0.000423819	remind - SSP1-NDC - 2040	MY	kilowatt hour		technosphere	electricity, medium voltage
market for electrode, negative, Ni	5.19114e-06	remind - SSP1-NDC - 2040	GLO	kilogram		technosphere	electrode, negative, Ni
market for ferromanganese, high-coal, 74.5% Mn	0.015278	remind - SSP1-NDC - 2040	GLO	kilogram		technosphere	ferromanganese, high-coal, 74.5% Mn
market for ferronickel	0.045	remind - SSP1-NDC - 2040	GLO	kilogram		technosphere	ferronickel
market for ferrosilicon	7.61609e-06	remind - SSP1-NDC - 2040	GLO	kilogram		technosphere	ferrosilicon
market for inert waste, for final disposal	-0.000565685	remind - SSP1-NDC - 2040	RoW	kilogram		technosphere	inert waste, for final disposal
market for iron ore concentrate	0.000622896	remind - SSP1-NDC - 2040	GLO	kilogram		technosphere	iron ore concentrate
market for iron scrap, sorted, pressed	0.198865	remind - SSP1-NDC - 2040	RoW	kilogram		technosphere	iron scrap, sorted, pressed
market for lime	0.00230153	remind - SSP1-NDC - 2040	RoW	kilogram		technosphere	lime
market for liquefied petroleum gas	1.06037e-05	remind - SSP1-NDC - 2040	RoW	kilogram		technosphere	liquefied petroleum gas
market for manganese	2.03289e-05	remind - SSP1-NDC - 2040	GLO	kilogram		technosphere	manganese
market for mill scale	-6.63e-05	remind - SSP1-NDC - 2040	RoW	kilogram		technosphere	mill scale
market for molybdenite	0.00059649	remind - SSP1-NDC - 2040	GLO	kilogram		technosphere	molybdenite
market for natural gas, high pressure	0.00120219	remind - SSP1-NDC - 2040	RoW	cubic meter		technosphere	natural gas, high pressure
market for nickel, class 1	5.83731e-07	remind - SSP1-NDC - 2040	GLO	kilogram		technosphere	nickel, class 1
market for nitrogen, liquid	0.00162595	remind - SSP1-NDC - 2040	RoW	kilogram		technosphere	nitrogen, liquid
market for oxygen, liquid	0.078054	remind - SSP1-NDC - 2040	World	kilogram		technosphere	oxygen, liquid
market for pig iron	0.867945	remind - SSP1-NDC - 2040	World	kilogram		technosphere	pig iron
market for propane	1.25241e-05	remind - SSP1-NDC - 2040	GLO	kilogram		technosphere	propane
market for quicklime, in pieces, loose	0.044833	remind - SSP1-NDC - 2040	RoW	kilogram		technosphere	quicklime, in pieces, loose
market for sponge iron	0.000780486	remind - SSP1-NDC - 2040	GLO	kilogram		technosphere	sponge iron
market for steam, in chemical industry	0.000366647	remind - SSP1-NDC - 2040	RoW	kilogram		technosphere	steam, in chemical industry
market for wastewater from pig iron production	-0.00134164	remind - SSP1-NDC - 2040	RoW	cubic meter		technosphere	wastewater from pig iron production
market for wastewater from pig iron production	-2.00385e-05	remind - SSP1-NDC - 2040	RoW	cubic meter		technosphere	wastewater from pig iron production
market group for electricity, medium voltage	0.00215756	remind - SSP1-NDC - 2040	RME	kilowatt hour		technosphere	electricity, medium voltage
market group for electricity, medium voltage	0.00380426	remind - SSP1-NDC - 2040	RLA	kilowatt hour		technosphere	electricity, medium voltage
market group for electricity, medium voltage	0.0201787	remind - SSP1-NDC - 2040	CN	kilowatt hour		technosphere	electricity, medium voltage
market group for electricity, medium voltage	0.0121919	remind - SSP1-NDC - 2040	RNA	kilowatt hour		technosphere	electricity, medium voltage
market group for electricity, medium voltage	0.00190922	remind - SSP1-NDC - 2040	RAF	kilowatt hour		technosphere	electricity, medium voltage
Activity	steel production, converter, low-alloyed, 2045
code	53c2d57febca4876ae0894cc1359eee6
comment	This dataset has been modified by `premise`, according to the performance for steel production indicated by the IAM model REMIND for the IAM region World in 2100, following the scenario SSP1-NDC. The energy efficiency of the process has been improved by 12%."Background: This activity represents the production of primary low-alloyed steel in a basic oxygen furnace (BOF), a discontinuous process in…
location	World
reference product	steel, low-alloyed
scenario	SSP1-NDC
type	process
unit	kilogram
worksheet name	steel_prod_SSP1-NDC
year	2045
Exchanges
name	amount	database	location	unit	categories	type	reference product
Carbon dioxide, fossil	0.0626236			kilogram	air	biosphere
Carbon dioxide, non-fossil	2.04331e-05			kilogram	air	biosphere
Carbon monoxide, fossil	0.00168214			kilogram	air	biosphere
Chromium III	2.73861e-08			kilogram	air	biosphere
Copper ion	1.38684e-07			kilogram	air	biosphere
Dioxins, measured as 2,3,7,8-tetrachlorodibenzo-p-dioxin	6.35767e-14			kilogram	air	biosphere
Heat, waste	0.204696			megajoule	air	biosphere
Iron ion	4.115e-05			kilogram	air	biosphere
Lead II	4.08167e-07			kilogram	air	biosphere
Manganese II	6.84105e-07			kilogram	air	biosphere
Nitrogen oxides	2.12368e-05			kilogram	air	biosphere
PAH, polycyclic aromatic hydrocarbons	1e-08			kilogram	air	biosphere
Particulate Matter, < 2.5 um	4.47437e-05			kilogram	air	biosphere
Water	0.00611841			cubic meter	air	biosphere
Water	5.00963e-06			cubic meter	air::non-urban air or from high stacks	biosphere
Water, cooling, unspecified natural origin	0.00577581			cubic meter	natural resource::in water	biosphere
Water, unspecified natural origin	2.50482e-05			cubic meter	natural resource::in water	biosphere
steel production, converter, low-alloyed, 2045	1	steel_prod_SSP1-NDC	World	kilogram		production	steel, low-alloyed
blast furnace gas, Recycled Content cut-off	-0.0304027	remind - SSP1-NDC - 2045	GLO	megajoule		technosphere	blast furnace gas
carbon dioxide, captured at steel production plant, with underground storage, post, 200 km	6.48062e-05	remind - SSP1-NDC - 2045	World	kilogram		technosphere	carbon dioxide, captured and stored
market for aluminium, wrought alloy	8.78501e-05	remind - SSP1-NDC - 2045	GLO	kilogram		technosphere	aluminium, wrought alloy
market for argon, liquid	0.000116964	remind - SSP1-NDC - 2045	RoW	kilogram		technosphere	argon, liquid
market for basic oxygen furnace dust	-0.019396	remind - SSP1-NDC - 2045	RoW	kilogram		technosphere	basic oxygen furnace dust
market for basic oxygen furnace secondary metallurgy slag	-0.0003008	remind - SSP1-NDC - 2045	RoW	kilogram		technosphere	basic oxygen furnace secondary metallurgy slag
market for basic oxygen furnace slag	-0.104898	remind - SSP1-NDC - 2045	RoW	kilogram		technosphere	basic oxygen furnace slag
market for basic oxygen furnace sludge	-0.0003008	remind - SSP1-NDC - 2045	RoW	kilogram		technosphere	basic oxygen furnace sludge
market for basic oxygen furnace waste	-0.00335064	remind - SSP1-NDC - 2045	GLO	kilogram		technosphere	basic oxygen furnace waste
market for blast oxygen furnace converter	1.3333e-11	remind - SSP1-NDC - 2045	GLO	unit		technosphere	blast oxygen furnace converter
market for calcium carbide, technical grade	0.000190693	remind - SSP1-NDC - 2045	RoW	kilogram		technosphere	calcium carbide, technical grade
market for coke	0.000183216	remind - SSP1-NDC - 2045	GLO	megajoule		technosphere	coke
market for compressed air, 600 kPa gauge	0.0144222	remind - SSP1-NDC - 2045	RoW	cubic meter		technosphere	compressed air, 600 kPa gauge
market for copper, cathode	7.98637e-07	remind - SSP1-NDC - 2045	GLO	kilogram		technosphere	copper, cathode
market for diesel	2.90413e-06	remind - SSP1-NDC - 2045	RoW	kilogram		technosphere	diesel
market for dolomite	0.00442218	remind - SSP1-NDC - 2045	RoW	kilogram		technosphere	dolomite
market for electricity, medium voltage	0.000576605	remind - SSP1-NDC - 2045	VN	kilowatt hour		technosphere	electricity, medium voltage
market for electricity, medium voltage	1.27593e-05	remind - SSP1-NDC - 2045	CY	kilowatt hour		technosphere	electricity, medium voltage
market for electricity, medium voltage	0.000163672	remind - SSP1-NDC - 2045	UZ	kilowatt hour		technosphere	electricity, medium voltage
market for electricity, medium voltage	4.56929e-05	remind - SSP1-NDC - 2045	TJ	kilowatt hour		technosphere	electricity, medium voltage
market for electricity, medium voltage	0.000473443	remind - SSP1-NDC - 2045	ID	kilowatt hour		technosphere	electricity, medium voltage
market for electricity, medium voltage	3.82103e-05	remind - SSP1-NDC - 2045	KG	kilowatt hour		technosphere	electricity, medium voltage
market for electricity, medium voltage	0.000297532	remind - SSP1-NDC - 2045	TH	kilowatt hour		technosphere	electricity, medium voltage
market for electricity, medium voltage	0.000261098	remind - SSP1-NDC - 2045	PH	kilowatt hour		technosphere	electricity, medium voltage
market for electricity, medium voltage	4.8956e-06	remind - SSP1-NDC - 2045	QA	kilowatt hour		technosphere	electricity, medium voltage
market for electricity, medium voltage	3.00521e-05	remind - SSP1-NDC - 2045	KH	kilowatt hour		technosphere	electricity, medium voltage
market for electricity, medium voltage	0.000122021	remind - SSP1-NDC - 2045	SG	kilowatt hour		technosphere	electricity, medium voltage
market for electricity, medium voltage	0.00141139	remind - SSP1-NDC - 2045	KR	kilowatt hour		technosphere	electricity, medium voltage
market for electricity, medium voltage	0.000596764	remind - SSP1-NDC - 2045	TW	kilowatt hour		technosphere	electricity, medium voltage
market for electricity, medium voltage	0.000113291	remind - SSP1-NDC - 2045	NZ	kilowatt hour		technosphere	electricity, medium voltage
market for electricity, medium voltage	3.03323e-05	remind - SSP1-NDC - 2045	GE	kilowatt hour		technosphere	electricity, medium voltage
market for electricity, medium voltage	3.67822e-05	remind - SSP1-NDC - 2045	LB	kilowatt hour		technosphere	electricity, medium voltage
market for electricity, medium voltage	0.000154597	remind - SSP1-NDC - 2045	IL	kilowatt hour		technosphere	electricity, medium voltage
market for electricity, medium voltage	4.60361e-05	remind - SSP1-NDC - 2045	TM	kilowatt hour		technosphere	electricity, medium voltage
market for electricity, medium voltage	5.75519e-05	remind - SSP1-NDC - 2045	MM	kilowatt hour		technosphere	electricity, medium voltage
market for electricity, medium voltage	6.44113e-06	remind - SSP1-NDC - 2045	YE	kilowatt hour		technosphere	electricity, medium voltage
market for electricity, medium voltage	0.000329828	remind - SSP1-NDC - 2045	PK	kilowatt hour		technosphere	electricity, medium voltage
market for electricity, medium voltage	1.69109e-05	remind - SSP1-NDC - 2045	AM	kilowatt hour		technosphere	electricity, medium voltage
market for electricity, medium voltage	5.63004e-05	remind - SSP1-NDC - 2045	AZ	kilowatt hour		technosphere	electricity, medium voltage
market for electricity, medium voltage	0.00069025	remind - SSP1-NDC - 2045	TR	kilowatt hour		technosphere	electricity, medium voltage
market for electricity, medium voltage	0.000184784	remind - SSP1-NDC - 2045	BD	kilowatt hour		technosphere	electricity, medium voltage
market for electricity, medium voltage	3.88544e-05	remind - SSP1-NDC - 2045	SY	kilowatt hour		technosphere	electricity, medium voltage
market for electricity, medium voltage	4.76386e-05	remind - SSP1-NDC - 2045	BH	kilowatt hour		technosphere	electricity, medium voltage
market for electricity, medium voltage	3.85723e-05	remind - SSP1-NDC - 2045	LK	kilowatt hour		technosphere	electricity, medium voltage
market for electricity, medium voltage	4.33284e-05	remind - SSP1-NDC - 2045	JO	kilowatt hour		technosphere	electricity, medium voltage
market for electricity, medium voltage	0.00225931	remind - SSP1-NDC - 2045	JP	kilowatt hour		technosphere	electricity, medium voltage
market for electricity, medium voltage	3.42881e-05	remind - SSP1-NDC - 2045	KP	kilowatt hour		technosphere	electricity, medium voltage
market for electricity, medium voltage	9.95727e-06	remind - SSP1-NDC - 2045	BN	kilowatt hour		technosphere	electricity, medium voltage
market for electricity, medium voltage	2.14721e-05	remind - SSP1-NDC - 2045	MN	kilowatt hour		technosphere	electricity, medium voltage
market for electricity, medium voltage	9.51554e-05	remind - SSP1-NDC - 2045	OM	kilowatt hour		technosphere	electricity, medium voltage
market for electricity, medium voltage	0.000262526	remind - SSP1-NDC - 2045	KZ	kilowatt hour		technosphere	electricity, medium voltage
market for electricity, medium voltage	0.000128484	remind - SSP1-NDC - 2045	HK	kilowatt hour		technosphere	electricity, medium voltage
market for electricity, medium voltage	1.96652e-05	remind - SSP1-NDC - 2045	NP	kilowatt hour		technosphere	electricity, medium voltage
market for electricity, medium voltage	0.000578056	remind - SSP1-NDC - 2045	AU	kilowatt hour		technosphere	electricity, medium voltage
market for electricity, medium voltage	0.000423819	remind - SSP1-NDC - 2045	MY	kilowatt hour		technosphere	electricity, medium voltage
market for electrode, negative, Ni	5.19114e-06	remind - SSP1-NDC - 2045	GLO	kilogram		technosphere	electrode, negative, Ni
market for ferromanganese, high-coal, 74.5% Mn	0.015278	remind - SSP1-NDC - 2045	GLO	kilogram		technosphere	ferromanganese, high-coal, 74.5% Mn
market for ferronickel	0.045	remind - SSP1-NDC - 2045	GLO	kilogram		technosphere	ferronickel
market for ferrosilicon	7.61609e-06	remind - SSP1-NDC - 2045	GLO	kilogram		technosphere	ferrosilicon
market for inert waste, for final disposal	-0.000565685	remind - SSP1-NDC - 2045	RoW	kilogram		technosphere	inert waste, for final disposal
market for iron ore concentrate	0.000622896	remind - SSP1-NDC - 2045	GLO	kilogram		technosphere	iron ore concentrate
market for iron scrap, sorted, pressed	0.198865	remind - SSP1-NDC - 2045	RoW	kilogram		technosphere	iron scrap, sorted, pressed
market for lime	0.00230153	remind - SSP1-NDC - 2045	RoW	kilogram		technosphere	lime
market for liquefied petroleum gas	1.06037e-05	remind - SSP1-NDC - 2045	RoW	kilogram		technosphere	liquefied petroleum gas
market for manganese	2.03289e-05	remind - SSP1-NDC - 2045	GLO	kilogram		technosphere	manganese
market for mill scale	-6.63e-05	remind - SSP1-NDC - 2045	RoW	kilogram		technosphere	mill scale
market for molybdenite	0.00059649	remind - SSP1-NDC - 2045	GLO	kilogram		technosphere	molybdenite
market for natural gas, high pressure	0.00120219	remind - SSP1-NDC - 2045	RoW	cubic meter		technosphere	natural gas, high pressure
market for nickel, class 1	5.83731e-07	remind - SSP1-NDC - 2045	GLO	kilogram		technosphere	nickel, class 1
market for nitrogen, liquid	0.00162595	remind - SSP1-NDC - 2045	RoW	kilogram		technosphere	nitrogen, liquid
market for oxygen, liquid	0.078054	remind - SSP1-NDC - 2045	World	kilogram		technosphere	oxygen, liquid
market for pig iron	0.867945	remind - SSP1-NDC - 2045	World	kilogram		technosphere	pig iron
market for propane	1.25241e-05	remind - SSP1-NDC - 2045	GLO	kilogram		technosphere	propane
market for quicklime, in pieces, loose	0.044833	remind - SSP1-NDC - 2045	RoW	kilogram		technosphere	quicklime, in pieces, loose
market for sponge iron	0.000780486	remind - SSP1-NDC - 2045	GLO	kilogram		technosphere	sponge iron
market for steam, in chemical industry	0.000366647	remind - SSP1-NDC - 2045	RoW	kilogram		technosphere	steam, in chemical industry
market for wastewater from pig iron production	-0.00134164	remind - SSP1-NDC - 2045	RoW	cubic meter		technosphere	wastewater from pig iron production
market for wastewater from pig iron production	-2.00385e-05	remind - SSP1-NDC - 2045	RoW	cubic meter		technosphere	wastewater from pig iron production
market group for electricity, medium voltage	0.00215756	remind - SSP1-NDC - 2045	RME	kilowatt hour		technosphere	electricity, medium voltage
market group for electricity, medium voltage	0.00380426	remind - SSP1-NDC - 2045	RLA	kilowatt hour		technosphere	electricity, medium voltage
market group for electricity, medium voltage	0.0201787	remind - SSP1-NDC - 2045	CN	kilowatt hour		technosphere	electricity, medium voltage
market group for electricity, medium voltage	0.0121919	remind - SSP1-NDC - 2045	RNA	kilowatt hour		technosphere	electricity, medium voltage
market group for electricity, medium voltage	0.00190922	remind - SSP1-NDC - 2045	RAF	kilowatt hour		technosphere	electricity, medium voltage
Activity	steel production, converter, low-alloyed, 2050
code	71f50fa2e0eb40afb41611febc79fa2e
comment	This dataset has been modified by `premise`, according to the performance for steel production indicated by the IAM model REMIND for the IAM region World in 2100, following the scenario SSP1-NDC. The energy efficiency of the process has been improved by 12%."Background: This activity represents the production of primary low-alloyed steel in a basic oxygen furnace (BOF), a discontinuous process in…
location	World
reference product	steel, low-alloyed
scenario	SSP1-NDC
type	process
unit	kilogram
worksheet name	steel_prod_SSP1-NDC
year	2050
Exchanges
name	amount	database	location	unit	categories	type	reference product
Carbon dioxide, fossil	0.0626236			kilogram	air	biosphere
Carbon dioxide, non-fossil	2.04331e-05			kilogram	air	biosphere
Carbon monoxide, fossil	0.00168214			kilogram	air	biosphere
Chromium III	2.73861e-08			kilogram	air	biosphere
Copper ion	1.38684e-07			kilogram	air	biosphere
Dioxins, measured as 2,3,7,8-tetrachlorodibenzo-p-dioxin	6.35767e-14			kilogram	air	biosphere
Heat, waste	0.204696			megajoule	air	biosphere
Iron ion	4.115e-05			kilogram	air	biosphere
Lead II	4.08167e-07			kilogram	air	biosphere
Manganese II	6.84105e-07			kilogram	air	biosphere
Nitrogen oxides	2.12368e-05			kilogram	air	biosphere
PAH, polycyclic aromatic hydrocarbons	1e-08			kilogram	air	biosphere
Particulate Matter, < 2.5 um	4.47437e-05			kilogram	air	biosphere
Water	0.00611841			cubic meter	air	biosphere
Water	5.00963e-06			cubic meter	air::non-urban air or from high stacks	biosphere
Water, cooling, unspecified natural origin	0.00577581			cubic meter	natural resource::in water	biosphere
Water, unspecified natural origin	2.50482e-05			cubic meter	natural resource::in water	biosphere
steel production, converter, low-alloyed, 2050	1	steel_prod_SSP1-NDC	World	kilogram		production	steel, low-alloyed
blast furnace gas, Recycled Content cut-off	-0.0304027	remind - SSP1-NDC - 2050	GLO	megajoule		technosphere	blast furnace gas
carbon dioxide, captured at steel production plant, with underground storage, post, 200 km	6.48062e-05	remind - SSP1-NDC - 2050	World	kilogram		technosphere	carbon dioxide, captured and stored
market for aluminium, wrought alloy	8.78501e-05	remind - SSP1-NDC - 2050	GLO	kilogram		technosphere	aluminium, wrought alloy
market for argon, liquid	0.000116964	remind - SSP1-NDC - 2050	RoW	kilogram		technosphere	argon, liquid
market for basic oxygen furnace dust	-0.019396	remind - SSP1-NDC - 2050	RoW	kilogram		technosphere	basic oxygen furnace dust
market for basic oxygen furnace secondary metallurgy slag	-0.0003008	remind - SSP1-NDC - 2050	RoW	kilogram		technosphere	basic oxygen furnace secondary metallurgy slag
market for basic oxygen furnace slag	-0.104898	remind - SSP1-NDC - 2050	RoW	kilogram		technosphere	basic oxygen furnace slag
market for basic oxygen furnace sludge	-0.0003008	remind - SSP1-NDC - 2050	RoW	kilogram		technosphere	basic oxygen furnace sludge
market for basic oxygen furnace waste	-0.00335064	remind - SSP1-NDC - 2050	GLO	kilogram		technosphere	basic oxygen furnace waste
market for blast oxygen furnace converter	1.3333e-11	remind - SSP1-NDC - 2050	GLO	unit		technosphere	blast oxygen furnace converter
market for calcium carbide, technical grade	0.000190693	remind - SSP1-NDC - 2050	RoW	kilogram		technosphere	calcium carbide, technical grade
market for coke	0.000183216	remind - SSP1-NDC - 2050	GLO	megajoule		technosphere	coke
market for compressed air, 600 kPa gauge	0.0144222	remind - SSP1-NDC - 2050	RoW	cubic meter		technosphere	compressed air, 600 kPa gauge
market for copper, cathode	7.98637e-07	remind - SSP1-NDC - 2050	GLO	kilogram		technosphere	copper, cathode
market for diesel	2.90413e-06	remind - SSP1-NDC - 2050	RoW	kilogram		technosphere	diesel
market for dolomite	0.00442218	remind - SSP1-NDC - 2050	RoW	kilogram		technosphere	dolomite
market for electricity, medium voltage	0.000576605	remind - SSP1-NDC - 2050	VN	kilowatt hour		technosphere	electricity, medium voltage
market for electricity, medium voltage	1.27593e-05	remind - SSP1-NDC - 2050	CY	kilowatt hour		technosphere	electricity, medium voltage
market for electricity, medium voltage	0.000163672	remind - SSP1-NDC - 2050	UZ	kilowatt hour		technosphere	electricity, medium voltage
market for electricity, medium voltage	4.56929e-05	remind - SSP1-NDC - 2050	TJ	kilowatt hour		technosphere	electricity, medium voltage
market for electricity, medium voltage	0.000473443	remind - SSP1-NDC - 2050	ID	kilowatt hour		technosphere	electricity, medium voltage
market for electricity, medium voltage	3.82103e-05	remind - SSP1-NDC - 2050	KG	kilowatt hour		technosphere	electricity, medium voltage
market for electricity, medium voltage	0.000297532	remind - SSP1-NDC - 2050	TH	kilowatt hour		technosphere	electricity, medium voltage
market for electricity, medium voltage	0.000261098	remind - SSP1-NDC - 2050	PH	kilowatt hour		technosphere	electricity, medium voltage
market for electricity, medium voltage	4.8956e-06	remind - SSP1-NDC - 2050	QA	kilowatt hour		technosphere	electricity, medium voltage
market for electricity, medium voltage	3.00521e-05	remind - SSP1-NDC - 2050	KH	kilowatt hour		technosphere	electricity, medium voltage
market for electricity, medium voltage	0.000122021	remind - SSP1-NDC - 2050	SG	kilowatt hour		technosphere	electricity, medium voltage
market for electricity, medium voltage	0.00141139	remind - SSP1-NDC - 2050	KR	kilowatt hour		technosphere	electricity, medium voltage
market for electricity, medium voltage	0.000596764	remind - SSP1-NDC - 2050	TW	kilowatt hour		technosphere	electricity, medium voltage
market for electricity, medium voltage	0.000113291	remind - SSP1-NDC - 2050	NZ	kilowatt hour		technosphere	electricity, medium voltage
market for electricity, medium voltage	3.03323e-05	remind - SSP1-NDC - 2050	GE	kilowatt hour		technosphere	electricity, medium voltage
market for electricity, medium voltage	3.67822e-05	remind - SSP1-NDC - 2050	LB	kilowatt hour		technosphere	electricity, medium voltage
market for electricity, medium voltage	0.000154597	remind - SSP1-NDC - 2050	IL	kilowatt hour		technosphere	electricity, medium voltage
market for electricity, medium voltage	4.60361e-05	remind - SSP1-NDC - 2050	TM	kilowatt hour		technosphere	electricity, medium voltage
market for electricity, medium voltage	5.75519e-05	remind - SSP1-NDC - 2050	MM	kilowatt hour		technosphere	electricity, medium voltage
market for electricity, medium voltage	6.44113e-06	remind - SSP1-NDC - 2050	YE	kilowatt hour		technosphere	electricity, medium voltage
market for electricity, medium voltage	0.000329828	remind - SSP1-NDC - 2050	PK	kilowatt hour		technosphere	electricity, medium voltage
market for electricity, medium voltage	1.69109e-05	remind - SSP1-NDC - 2050	AM	kilowatt hour		technosphere	electricity, medium voltage
market for electricity, medium voltage	5.63004e-05	remind - SSP1-NDC - 2050	AZ	kilowatt hour		technosphere	electricity, medium voltage
market for electricity, medium voltage	0.00069025	remind - SSP1-NDC - 2050	TR	kilowatt hour		technosphere	electricity, medium voltage
market for electricity, medium voltage	0.000184784	remind - SSP1-NDC - 2050	BD	kilowatt hour		technosphere	electricity, medium voltage
market for electricity, medium voltage	3.88544e-05	remind - SSP1-NDC - 2050	SY	kilowatt hour		technosphere	electricity, medium voltage
market for electricity, medium voltage	4.76386e-05	remind - SSP1-NDC - 2050	BH	kilowatt hour		technosphere	electricity, medium voltage
market for electricity, medium voltage	3.85723e-05	remind - SSP1-NDC - 2050	LK	kilowatt hour		technosphere	electricity, medium voltage
market for electricity, medium voltage	4.33284e-05	remind - SSP1-NDC - 2050	JO	kilowatt hour		technosphere	electricity, medium voltage
market for electricity, medium voltage	0.00225931	remind - SSP1-NDC - 2050	JP	kilowatt hour		technosphere	electricity, medium voltage
market for electricity, medium voltage	3.42881e-05	remind - SSP1-NDC - 2050	KP	kilowatt hour		technosphere	electricity, medium voltage
market for electricity, medium voltage	9.95727e-06	remind - SSP1-NDC - 2050	BN	kilowatt hour		technosphere	electricity, medium voltage
market for electricity, medium voltage	2.14721e-05	remind - SSP1-NDC - 2050	MN	kilowatt hour		technosphere	electricity, medium voltage
market for electricity, medium voltage	9.51554e-05	remind - SSP1-NDC - 2050	OM	kilowatt hour		technosphere	electricity, medium voltage
market for electricity, medium voltage	0.000262526	remind - SSP1-NDC - 2050	KZ	kilowatt hour		technosphere	electricity, medium voltage
market for electricity, medium voltage	0.000128484	remind - SSP1-NDC - 2050	HK	kilowatt hour		technosphere	electricity, medium voltage
market for electricity, medium voltage	1.96652e-05	remind - SSP1-NDC - 2050	NP	kilowatt hour		technosphere	electricity, medium voltage
market for electricity, medium voltage	0.000578056	remind - SSP1-NDC - 2050	AU	kilowatt hour		technosphere	electricity, medium voltage
market for electricity, medium voltage	0.000423819	remind - SSP1-NDC - 2050	MY	kilowatt hour		technosphere	electricity, medium voltage
market for electrode, negative, Ni	5.19114e-06	remind - SSP1-NDC - 2050	GLO	kilogram		technosphere	electrode, negative, Ni
market for ferromanganese, high-coal, 74.5% Mn	0.015278	remind - SSP1-NDC - 2050	GLO	kilogram		technosphere	ferromanganese, high-coal, 74.5% Mn
market for ferronickel	0.045	remind - SSP1-NDC - 2050	GLO	kilogram		technosphere	ferronickel
market for ferrosilicon	7.61609e-06	remind - SSP1-NDC - 2050	GLO	kilogram		technosphere	ferrosilicon
market for inert waste, for final disposal	-0.000565685	remind - SSP1-NDC - 2050	RoW	kilogram		technosphere	inert waste, for final disposal
market for iron ore concentrate	0.000622896	remind - SSP1-NDC - 2050	GLO	kilogram		technosphere	iron ore concentrate
market for iron scrap, sorted, pressed	0.198865	remind - SSP1-NDC - 2050	RoW	kilogram		technosphere	iron scrap, sorted, pressed
market for lime	0.00230153	remind - SSP1-NDC - 2050	RoW	kilogram		technosphere	lime
market for liquefied petroleum gas	1.06037e-05	remind - SSP1-NDC - 2050	RoW	kilogram		technosphere	liquefied petroleum gas
market for manganese	2.03289e-05	remind - SSP1-NDC - 2050	GLO	kilogram		technosphere	manganese
market for mill scale	-6.63e-05	remind - SSP1-NDC - 2050	RoW	kilogram		technosphere	mill scale
market for molybdenite	0.00059649	remind - SSP1-NDC - 2050	GLO	kilogram		technosphere	molybdenite
market for natural gas, high pressure	0.00120219	remind - SSP1-NDC - 2050	RoW	cubic meter		technosphere	natural gas, high pressure
market for nickel, class 1	5.83731e-07	remind - SSP1-NDC - 2050	GLO	kilogram		technosphere	nickel, class 1
market for nitrogen, liquid	0.00162595	remind - SSP1-NDC - 2050	RoW	kilogram		technosphere	nitrogen, liquid
market for oxygen, liquid	0.078054	remind - SSP1-NDC - 2050	World	kilogram		technosphere	oxygen, liquid
market for pig iron	0.867945	remind - SSP1-NDC - 2050	World	kilogram		technosphere	pig iron
market for propane	1.25241e-05	remind - SSP1-NDC - 2050	GLO	kilogram		technosphere	propane
market for quicklime, in pieces, loose	0.044833	remind - SSP1-NDC - 2050	RoW	kilogram		technosphere	quicklime, in pieces, loose
market for sponge iron	0.000780486	remind - SSP1-NDC - 2050	GLO	kilogram		technosphere	sponge iron
market for steam, in chemical industry	0.000366647	remind - SSP1-NDC - 2050	RoW	kilogram		technosphere	steam, in chemical industry
market for wastewater from pig iron production	-0.00134164	remind - SSP1-NDC - 2050	RoW	cubic meter		technosphere	wastewater from pig iron production
market for wastewater from pig iron production	-2.00385e-05	remind - SSP1-NDC - 2050	RoW	cubic meter		technosphere	wastewater from pig iron production
market group for electricity, medium voltage	0.00215756	remind - SSP1-NDC - 2050	RME	kilowatt hour		technosphere	electricity, medium voltage
market group for electricity, medium voltage	0.00380426	remind - SSP1-NDC - 2050	RLA	kilowatt hour		technosphere	electricity, medium voltage
market group for electricity, medium voltage	0.0201787	remind - SSP1-NDC - 2050	CN	kilowatt hour		technosphere	electricity, medium voltage
market group for electricity, medium voltage	0.0121919	remind - SSP1-NDC - 2050	RNA	kilowatt hour		technosphere	electricity, medium voltage
market group for electricity, medium voltage	0.00190922	remind - SSP1-NDC - 2050	RAF	kilowatt hour		technosphere	electricity, medium voltage
Activity	steel production, electric, chromium steel 18/8, optimistic, 2025
code	63a6ef3a2a3c4efc914803bad3db9f11
comment	This dataset has been modified by `premise`, according to the performance for steel production indicated by the IAM model REMIND for the IAM region World in 2100, following the scenario SSP1-NDC. The energy efficiency of the process has been improved by 28%.Background: This activity represents the production of stainless steel (Type 304, aka. 18/8; assumed composition 68.6% Fe, 9.3% Ni, 19.0% Cr …
location	World
reference product	steel, chromium steel 18/8
scenario	SSP1-NDC
type	process
unit	kilogram
worksheet name	steel_prod_SSP1-NDC
year	2025
Exchanges
name	amount	database	location	unit	categories	type	reference product
Benzene	3.63318e-07			kilogram	air	biosphere
Benzene, hexachloro-	1.54919e-09			kilogram	air	biosphere
Cadmium II	1.21655e-08			kilogram	air	biosphere
Carbon dioxide, fossil	0.033168			kilogram	air	biosphere
Carbon dioxide, non-fossil	9.475e-05			kilogram	air	biosphere
Carbon monoxide, fossil	0.000474342			kilogram	air	biosphere
Chromium III	1.83303e-07			kilogram	air	biosphere
Copper ion	7.48999e-08			kilogram	air	biosphere
Dioxins, measured as 2,3,7,8-tetrachlorodibenzo-p-dioxin	4.89898e-13			kilogram	air	biosphere
Hydrocarbons, aromatic	7.7008e-05			kilogram	air	biosphere
Hydrochloric acid	5.31037e-06			kilogram	air	biosphere
Hydrogen fluoride	2.44949e-08			kilogram	air	biosphere
Lead II	4.62331e-07			kilogram	air	biosphere
Mercury II	2e-08			kilogram	air	biosphere
Nickel II	7.74597e-08			kilogram	air	biosphere
Nitrogen oxides	7.73305e-05			kilogram	air	biosphere
PAH, polycyclic aromatic hydrocarbons	9.34345e-08			kilogram	air	biosphere
Particulate Matter, < 2.5 um	1.47224e-05			kilogram	air	biosphere
Particulate Matter, > 10 um	5.19615e-06			kilogram	air	biosphere
Particulate Matter, > 2.5 um and < 10um	1.47224e-05			kilogram	air	biosphere
Polychlorinated biphenyls	2.23607e-10			kilogram	air	biosphere
Sulfur dioxide	3.24037e-05			kilogram	air	biosphere
Water	0.0022952			cubic meter	water	biosphere
Water	0.00292117			cubic meter	air	biosphere
Water, cooling, unspecified natural origin	0.00654217			cubic meter	natural resource::in water	biosphere
Zinc II	2.19089e-06			kilogram	air	biosphere
steel production, electric, chromium steel 18/8, optimistic, 2025	1	steel_prod_SSP1-NDC	World	kilogram		production	steel, chromium steel 18/8
carbon dioxide, captured at steel production plant, with underground storage, post, 200 km	3.44109e-05	remind - SSP1-NDC - 2025	World	kilogram		technosphere	carbon dioxide, captured and stored
market for anode, for metal electrolysis	0.004	remind - SSP1-NDC - 2025	GLO	kilogram		technosphere	anode, for metal electrolysis
market for argon, liquid	0.032	remind - SSP1-NDC - 2025	RoW	kilogram		technosphere	argon, liquid
market for electric arc furnace converter	4e-11	remind - SSP1-NDC - 2025	GLO	unit		technosphere	electric arc furnace converter
market for electric arc furnace dust	0	remind - SSP1-NDC - 2025	RoW	kilogram		technosphere	electric arc furnace dust
market for electric arc furnace secondary metallurgy slag	0	remind - SSP1-NDC - 2025	RoW	kilogram		technosphere	electric arc furnace secondary metallurgy slag
market for electric arc furnace slag	0	remind - SSP1-NDC - 2025	RoW	kilogram		technosphere	electric arc furnace slag
market for electricity, medium voltage	0.000998198	remind - SSP1-NDC - 2025	NZ	kilowatt hour		technosphere	electricity, medium voltage
market for electricity, medium voltage	0.00509321	remind - SSP1-NDC - 2025	AU	kilowatt hour		technosphere	electricity, medium voltage
market for ferrochromium, high-carbon, 68% Cr	0	remind - SSP1-NDC - 2025	GLO	kilogram		technosphere	ferrochromium, high-carbon, 68% Cr
market for ferronickel	0	remind - SSP1-NDC - 2025	GLO	kilogram		technosphere	ferronickel
market for hard coal	0.00691265	remind - SSP1-NDC - 2025	RoW	kilogram		technosphere	hard coal
market for hot rolling, steel	1	remind - SSP1-NDC - 2025	GLO	kilogram		technosphere	hot rolling, steel
market for inert waste, for final disposal	-0.00678233	remind - SSP1-NDC - 2025	RoW	kilogram		technosphere	inert waste, for final disposal
market for iron scrap, sorted, pressed	0	remind - SSP1-NDC - 2025	RoW	kilogram		technosphere	iron scrap, sorted, pressed
market for natural gas, high pressure	0.00564357	remind - SSP1-NDC - 2025	RoW	cubic meter		technosphere	natural gas, high pressure
market for nitrogen, liquid	0.00359723	remind - SSP1-NDC - 2025	RoW	kilogram		technosphere	nitrogen, liquid
market for oxygen, liquid	0.036	remind - SSP1-NDC - 2025	World	kilogram		technosphere	oxygen, liquid
market for quicklime, in pieces, loose	0.0591608	remind - SSP1-NDC - 2025	RoW	kilogram		technosphere	quicklime, in pieces, loose
market for refractory, basic, packed	0.0154919	remind - SSP1-NDC - 2025	GLO	kilogram		technosphere	refractory, basic, packed
market group for electricity, medium voltage	0.0335191	remind - SSP1-NDC - 2025	RLA	kilowatt hour		technosphere	electricity, medium voltage
market group for electricity, medium voltage	0.107422	remind - SSP1-NDC - 2025	RNA	kilowatt hour		technosphere	electricity, medium voltage
market group for electricity, medium voltage	0.016822	remind - SSP1-NDC - 2025	RAF	kilowatt hour		technosphere	electricity, medium voltage
market group for electricity, medium voltage	0.30754	remind - SSP1-NDC - 2025	RAS	kilowatt hour		technosphere	electricity, medium voltage
preperation for recycling, steel scrap, from fossil infrastructure, 2025	1.1355	steel_prod_SSP1-NDC	GLO	kilogram		technosphere	steel scrap, from fossil infrastructure
treatment of electric arc furnace dust, residual material landfill, optimistic, 2025	-0.0191274	steel_prod_SSP1-NDC	RoW	kilogram		technosphere	electric arc furnace dust
treatment of electric arc furnace slag, chromium steel, residual material landfill, optimistic, 2025	-0.165106	steel_prod_SSP1-NDC	GLO	kilogram		technosphere	electric arc furnace slag
Activity	steel production, electric, chromium steel 18/8, optimistic, 2030
code	124df17435da4d71a784e081b80ba0c5
comment	This dataset has been modified by `premise`, according to the performance for steel production indicated by the IAM model REMIND for the IAM region World in 2100, following the scenario SSP1-NDC. The energy efficiency of the process has been improved by 28%.Background: This activity represents the production of stainless steel (Type 304, aka. 18/8; assumed composition 68.6% Fe, 9.3% Ni, 19.0% Cr …
location	World
reference product	steel, chromium steel 18/8
scenario	SSP1-NDC
type	process
unit	kilogram
worksheet name	steel_prod_SSP1-NDC
year	2030
Exchanges
name	amount	database	location	unit	categories	type	reference product
Benzene	3.63318e-07			kilogram	air	biosphere
Benzene, hexachloro-	1.54919e-09			kilogram	air	biosphere
Cadmium II	1.21655e-08			kilogram	air	biosphere
Carbon dioxide, fossil	0.033168			kilogram	air	biosphere
Carbon dioxide, non-fossil	9.475e-05			kilogram	air	biosphere
Carbon monoxide, fossil	0.000474342			kilogram	air	biosphere
Chromium III	1.83303e-07			kilogram	air	biosphere
Copper ion	7.48999e-08			kilogram	air	biosphere
Dioxins, measured as 2,3,7,8-tetrachlorodibenzo-p-dioxin	4.89898e-13			kilogram	air	biosphere
Hydrocarbons, aromatic	7.7008e-05			kilogram	air	biosphere
Hydrochloric acid	5.31037e-06			kilogram	air	biosphere
Hydrogen fluoride	2.44949e-08			kilogram	air	biosphere
Lead II	4.62331e-07			kilogram	air	biosphere
Mercury II	2e-08			kilogram	air	biosphere
Nickel II	7.74597e-08			kilogram	air	biosphere
Nitrogen oxides	7.73305e-05			kilogram	air	biosphere
PAH, polycyclic aromatic hydrocarbons	9.34345e-08			kilogram	air	biosphere
Particulate Matter, < 2.5 um	1.47224e-05			kilogram	air	biosphere
Particulate Matter, > 10 um	5.19615e-06			kilogram	air	biosphere
Particulate Matter, > 2.5 um and < 10um	1.47224e-05			kilogram	air	biosphere
Polychlorinated biphenyls	2.23607e-10			kilogram	air	biosphere
Sulfur dioxide	3.24037e-05			kilogram	air	biosphere
Water	0.0022952			cubic meter	water	biosphere
Water	0.00292117			cubic meter	air	biosphere
Water, cooling, unspecified natural origin	0.00654217			cubic meter	natural resource::in water	biosphere
Zinc II	2.19089e-06			kilogram	air	biosphere
steel production, electric, chromium steel 18/8, optimistic, 2030	1	steel_prod_SSP1-NDC	World	kilogram		production	steel, chromium steel 18/8
carbon dioxide, captured at steel production plant, with underground storage, post, 200 km	3.44109e-05	remind - SSP1-NDC - 2030	World	kilogram		technosphere	carbon dioxide, captured and stored
market for anode, for metal electrolysis	0.004	remind - SSP1-NDC - 2030	GLO	kilogram		technosphere	anode, for metal electrolysis
market for argon, liquid	0.032	remind - SSP1-NDC - 2030	RoW	kilogram		technosphere	argon, liquid
market for electric arc furnace converter	4e-11	remind - SSP1-NDC - 2030	GLO	unit		technosphere	electric arc furnace converter
market for electric arc furnace dust	0	remind - SSP1-NDC - 2030	RoW	kilogram		technosphere	electric arc furnace dust
market for electric arc furnace secondary metallurgy slag	0	remind - SSP1-NDC - 2030	RoW	kilogram		technosphere	electric arc furnace secondary metallurgy slag
market for electric arc furnace slag	0	remind - SSP1-NDC - 2030	RoW	kilogram		technosphere	electric arc furnace slag
market for electricity, medium voltage	0.000998198	remind - SSP1-NDC - 2030	NZ	kilowatt hour		technosphere	electricity, medium voltage
market for electricity, medium voltage	0.00509321	remind - SSP1-NDC - 2030	AU	kilowatt hour		technosphere	electricity, medium voltage
market for ferrochromium, high-carbon, 68% Cr	0	remind - SSP1-NDC - 2030	GLO	kilogram		technosphere	ferrochromium, high-carbon, 68% Cr
market for ferronickel	0	remind - SSP1-NDC - 2030	GLO	kilogram		technosphere	ferronickel
market for hard coal	0.00691265	remind - SSP1-NDC - 2030	RoW	kilogram		technosphere	hard coal
market for hot rolling, steel	1	remind - SSP1-NDC - 2030	GLO	kilogram		technosphere	hot rolling, steel
market for inert waste, for final disposal	-0.00678233	remind - SSP1-NDC - 2030	RoW	kilogram		technosphere	inert waste, for final disposal
market for iron scrap, sorted, pressed	0	remind - SSP1-NDC - 2030	RoW	kilogram		technosphere	iron scrap, sorted, pressed
market for natural gas, high pressure	0.00564357	remind - SSP1-NDC - 2030	RoW	cubic meter		technosphere	natural gas, high pressure
market for nitrogen, liquid	0.00359723	remind - SSP1-NDC - 2030	RoW	kilogram		technosphere	nitrogen, liquid
market for oxygen, liquid	0.036	remind - SSP1-NDC - 2030	World	kilogram		technosphere	oxygen, liquid
market for quicklime, in pieces, loose	0.0591608	remind - SSP1-NDC - 2030	RoW	kilogram		technosphere	quicklime, in pieces, loose
market for refractory, basic, packed	0.0154919	remind - SSP1-NDC - 2030	GLO	kilogram		technosphere	refractory, basic, packed
market group for electricity, medium voltage	0.0335191	remind - SSP1-NDC - 2030	RLA	kilowatt hour		technosphere	electricity, medium voltage
market group for electricity, medium voltage	0.107422	remind - SSP1-NDC - 2030	RNA	kilowatt hour		technosphere	electricity, medium voltage
market group for electricity, medium voltage	0.016822	remind - SSP1-NDC - 2030	RAF	kilowatt hour		technosphere	electricity, medium voltage
market group for electricity, medium voltage	0.30754	remind - SSP1-NDC - 2030	RAS	kilowatt hour		technosphere	electricity, medium voltage
preperation for recycling, steel scrap, from fossil infrastructure, 2030	1.1355	steel_prod_SSP1-NDC	GLO	kilogram		technosphere	steel scrap, from fossil infrastructure
treatment of electric arc furnace dust, residual material landfill, optimistic, 2030	-0.0191274	steel_prod_SSP1-NDC	RoW	kilogram		technosphere	electric arc furnace dust
treatment of electric arc furnace slag, chromium steel, residual material landfill, optimistic, 2030	-0.165106	steel_prod_SSP1-NDC	GLO	kilogram		technosphere	electric arc furnace slag
Activity	steel production, electric, chromium steel 18/8, optimistic, 2035
code	db195973579e4ca0b04a22c1f1ff221f
comment	This dataset has been modified by `premise`, according to the performance for steel production indicated by the IAM model REMIND for the IAM region World in 2100, following the scenario SSP1-NDC. The energy efficiency of the process has been improved by 28%.Background: This activity represents the production of stainless steel (Type 304, aka. 18/8; assumed composition 68.6% Fe, 9.3% Ni, 19.0% Cr …
location	World
reference product	steel, chromium steel 18/8
scenario	SSP1-NDC
type	process
unit	kilogram
worksheet name	steel_prod_SSP1-NDC
year	2035
Exchanges
name	amount	database	location	unit	categories	type	reference product
Benzene	3.63318e-07			kilogram	air	biosphere
Benzene, hexachloro-	1.54919e-09			kilogram	air	biosphere
Cadmium II	1.21655e-08			kilogram	air	biosphere
Carbon dioxide, fossil	0.033168			kilogram	air	biosphere
Carbon dioxide, non-fossil	9.475e-05			kilogram	air	biosphere
Carbon monoxide, fossil	0.000474342			kilogram	air	biosphere
Chromium III	1.83303e-07			kilogram	air	biosphere
Copper ion	7.48999e-08			kilogram	air	biosphere
Dioxins, measured as 2,3,7,8-tetrachlorodibenzo-p-dioxin	4.89898e-13			kilogram	air	biosphere
Hydrocarbons, aromatic	7.7008e-05			kilogram	air	biosphere
Hydrochloric acid	5.31037e-06			kilogram	air	biosphere
Hydrogen fluoride	2.44949e-08			kilogram	air	biosphere
Lead II	4.62331e-07			kilogram	air	biosphere
Mercury II	2e-08			kilogram	air	biosphere
Nickel II	7.74597e-08			kilogram	air	biosphere
Nitrogen oxides	7.73305e-05			kilogram	air	biosphere
PAH, polycyclic aromatic hydrocarbons	9.34345e-08			kilogram	air	biosphere
Particulate Matter, < 2.5 um	1.47224e-05			kilogram	air	biosphere
Particulate Matter, > 10 um	5.19615e-06			kilogram	air	biosphere
Particulate Matter, > 2.5 um and < 10um	1.47224e-05			kilogram	air	biosphere
Polychlorinated biphenyls	2.23607e-10			kilogram	air	biosphere
Sulfur dioxide	3.24037e-05			kilogram	air	biosphere
Water	0.0022952			cubic meter	water	biosphere
Water	0.00292117			cubic meter	air	biosphere
Water, cooling, unspecified natural origin	0.00654217			cubic meter	natural resource::in water	biosphere
Zinc II	2.19089e-06			kilogram	air	biosphere
steel production, electric, chromium steel 18/8, optimistic, 2035	1	steel_prod_SSP1-NDC	World	kilogram		production	steel, chromium steel 18/8
carbon dioxide, captured at steel production plant, with underground storage, post, 200 km	3.44109e-05	remind - SSP1-NDC - 2035	World	kilogram		technosphere	carbon dioxide, captured and stored
market for anode, for metal electrolysis	0.004	remind - SSP1-NDC - 2035	GLO	kilogram		technosphere	anode, for metal electrolysis
market for argon, liquid	0.032	remind - SSP1-NDC - 2035	RoW	kilogram		technosphere	argon, liquid
market for electric arc furnace converter	4e-11	remind - SSP1-NDC - 2035	GLO	unit		technosphere	electric arc furnace converter
market for electric arc furnace dust	0	remind - SSP1-NDC - 2035	RoW	kilogram		technosphere	electric arc furnace dust
market for electric arc furnace secondary metallurgy slag	0	remind - SSP1-NDC - 2035	RoW	kilogram		technosphere	electric arc furnace secondary metallurgy slag
market for electric arc furnace slag	0	remind - SSP1-NDC - 2035	RoW	kilogram		technosphere	electric arc furnace slag
market for electricity, medium voltage	0.000998198	remind - SSP1-NDC - 2035	NZ	kilowatt hour		technosphere	electricity, medium voltage
market for electricity, medium voltage	0.00509321	remind - SSP1-NDC - 2035	AU	kilowatt hour		technosphere	electricity, medium voltage
market for ferrochromium, high-carbon, 68% Cr	0	remind - SSP1-NDC - 2035	GLO	kilogram		technosphere	ferrochromium, high-carbon, 68% Cr
market for ferronickel	0	remind - SSP1-NDC - 2035	GLO	kilogram		technosphere	ferronickel
market for hard coal	0.00691265	remind - SSP1-NDC - 2035	RoW	kilogram		technosphere	hard coal
market for hot rolling, steel	1	remind - SSP1-NDC - 2035	GLO	kilogram		technosphere	hot rolling, steel
market for inert waste, for final disposal	-0.00678233	remind - SSP1-NDC - 2035	RoW	kilogram		technosphere	inert waste, for final disposal
market for iron scrap, sorted, pressed	0	remind - SSP1-NDC - 2035	RoW	kilogram		technosphere	iron scrap, sorted, pressed
market for natural gas, high pressure	0.00564357	remind - SSP1-NDC - 2035	RoW	cubic meter		technosphere	natural gas, high pressure
market for nitrogen, liquid	0.00359723	remind - SSP1-NDC - 2035	RoW	kilogram		technosphere	nitrogen, liquid
market for oxygen, liquid	0.036	remind - SSP1-NDC - 2035	World	kilogram		technosphere	oxygen, liquid
market for quicklime, in pieces, loose	0.0591608	remind - SSP1-NDC - 2035	RoW	kilogram		technosphere	quicklime, in pieces, loose
market for refractory, basic, packed	0.0154919	remind - SSP1-NDC - 2035	GLO	kilogram		technosphere	refractory, basic, packed
market group for electricity, medium voltage	0.0335191	remind - SSP1-NDC - 2035	RLA	kilowatt hour		technosphere	electricity, medium voltage
market group for electricity, medium voltage	0.107422	remind - SSP1-NDC - 2035	RNA	kilowatt hour		technosphere	electricity, medium voltage
market group for electricity, medium voltage	0.016822	remind - SSP1-NDC - 2035	RAF	kilowatt hour		technosphere	electricity, medium voltage
market group for electricity, medium voltage	0.30754	remind - SSP1-NDC - 2035	RAS	kilowatt hour		technosphere	electricity, medium voltage
preperation for recycling, steel scrap, from fossil infrastructure, 2035	1.1355	steel_prod_SSP1-NDC	GLO	kilogram		technosphere	steel scrap, from fossil infrastructure
treatment of electric arc furnace dust, residual material landfill, optimistic, 2035	-0.0191274	steel_prod_SSP1-NDC	RoW	kilogram		technosphere	electric arc furnace dust
treatment of electric arc furnace slag, chromium steel, residual material landfill, optimistic, 2035	-0.165106	steel_prod_SSP1-NDC	GLO	kilogram		technosphere	electric arc furnace slag
Activity	steel production, electric, chromium steel 18/8, optimistic, 2040
code	1516501b1df345699e1f796173fc710c
comment	This dataset has been modified by `premise`, according to the performance for steel production indicated by the IAM model REMIND for the IAM region World in 2100, following the scenario SSP1-NDC. The energy efficiency of the process has been improved by 28%.Background: This activity represents the production of stainless steel (Type 304, aka. 18/8; assumed composition 68.6% Fe, 9.3% Ni, 19.0% Cr …
location	World
reference product	steel, chromium steel 18/8
scenario	SSP1-NDC
type	process
unit	kilogram
worksheet name	steel_prod_SSP1-NDC
year	2040
Exchanges
name	amount	database	location	unit	categories	type	reference product
Benzene	3.63318e-07			kilogram	air	biosphere
Benzene, hexachloro-	1.54919e-09			kilogram	air	biosphere
Cadmium II	1.21655e-08			kilogram	air	biosphere
Carbon dioxide, fossil	0.033168			kilogram	air	biosphere
Carbon dioxide, non-fossil	9.475e-05			kilogram	air	biosphere
Carbon monoxide, fossil	0.000474342			kilogram	air	biosphere
Chromium III	1.83303e-07			kilogram	air	biosphere
Copper ion	7.48999e-08			kilogram	air	biosphere
Dioxins, measured as 2,3,7,8-tetrachlorodibenzo-p-dioxin	4.89898e-13			kilogram	air	biosphere
Hydrocarbons, aromatic	7.7008e-05			kilogram	air	biosphere
Hydrochloric acid	5.31037e-06			kilogram	air	biosphere
Hydrogen fluoride	2.44949e-08			kilogram	air	biosphere
Lead II	4.62331e-07			kilogram	air	biosphere
Mercury II	2e-08			kilogram	air	biosphere
Nickel II	7.74597e-08			kilogram	air	biosphere
Nitrogen oxides	7.73305e-05			kilogram	air	biosphere
PAH, polycyclic aromatic hydrocarbons	9.34345e-08			kilogram	air	biosphere
Particulate Matter, < 2.5 um	1.47224e-05			kilogram	air	biosphere
Particulate Matter, > 10 um	5.19615e-06			kilogram	air	biosphere
Particulate Matter, > 2.5 um and < 10um	1.47224e-05			kilogram	air	biosphere
Polychlorinated biphenyls	2.23607e-10			kilogram	air	biosphere
Sulfur dioxide	3.24037e-05			kilogram	air	biosphere
Water	0.0022952			cubic meter	water	biosphere
Water	0.00292117			cubic meter	air	biosphere
Water, cooling, unspecified natural origin	0.00654217			cubic meter	natural resource::in water	biosphere
Zinc II	2.19089e-06			kilogram	air	biosphere
steel production, electric, chromium steel 18/8, optimistic, 2040	1	steel_prod_SSP1-NDC	World	kilogram		production	steel, chromium steel 18/8
carbon dioxide, captured at steel production plant, with underground storage, post, 200 km	3.44109e-05	remind - SSP1-NDC - 2040	World	kilogram		technosphere	carbon dioxide, captured and stored
market for anode, for metal electrolysis	0.004	remind - SSP1-NDC - 2040	GLO	kilogram		technosphere	anode, for metal electrolysis
market for argon, liquid	0.032	remind - SSP1-NDC - 2040	RoW	kilogram		technosphere	argon, liquid
market for electric arc furnace converter	4e-11	remind - SSP1-NDC - 2040	GLO	unit		technosphere	electric arc furnace converter
market for electric arc furnace dust	0	remind - SSP1-NDC - 2040	RoW	kilogram		technosphere	electric arc furnace dust
market for electric arc furnace secondary metallurgy slag	0	remind - SSP1-NDC - 2040	RoW	kilogram		technosphere	electric arc furnace secondary metallurgy slag
market for electric arc furnace slag	0	remind - SSP1-NDC - 2040	RoW	kilogram		technosphere	electric arc furnace slag
market for electricity, medium voltage	0.000998198	remind - SSP1-NDC - 2040	NZ	kilowatt hour		technosphere	electricity, medium voltage
market for electricity, medium voltage	0.00509321	remind - SSP1-NDC - 2040	AU	kilowatt hour		technosphere	electricity, medium voltage
market for ferrochromium, high-carbon, 68% Cr	0	remind - SSP1-NDC - 2040	GLO	kilogram		technosphere	ferrochromium, high-carbon, 68% Cr
market for ferronickel	0	remind - SSP1-NDC - 2040	GLO	kilogram		technosphere	ferronickel
market for hard coal	0.00691265	remind - SSP1-NDC - 2040	RoW	kilogram		technosphere	hard coal
market for hot rolling, steel	1	remind - SSP1-NDC - 2040	GLO	kilogram		technosphere	hot rolling, steel
market for inert waste, for final disposal	-0.00678233	remind - SSP1-NDC - 2040	RoW	kilogram		technosphere	inert waste, for final disposal
market for iron scrap, sorted, pressed	0	remind - SSP1-NDC - 2040	RoW	kilogram		technosphere	iron scrap, sorted, pressed
market for natural gas, high pressure	0.00564357	remind - SSP1-NDC - 2040	RoW	cubic meter		technosphere	natural gas, high pressure
market for nitrogen, liquid	0.00359723	remind - SSP1-NDC - 2040	RoW	kilogram		technosphere	nitrogen, liquid
market for oxygen, liquid	0.036	remind - SSP1-NDC - 2040	World	kilogram		technosphere	oxygen, liquid
market for quicklime, in pieces, loose	0.0591608	remind - SSP1-NDC - 2040	RoW	kilogram		technosphere	quicklime, in pieces, loose
market for refractory, basic, packed	0.0154919	remind - SSP1-NDC - 2040	GLO	kilogram		technosphere	refractory, basic, packed
market group for electricity, medium voltage	0.0335191	remind - SSP1-NDC - 2040	RLA	kilowatt hour		technosphere	electricity, medium voltage
market group for electricity, medium voltage	0.107422	remind - SSP1-NDC - 2040	RNA	kilowatt hour		technosphere	electricity, medium voltage
market group for electricity, medium voltage	0.016822	remind - SSP1-NDC - 2040	RAF	kilowatt hour		technosphere	electricity, medium voltage
market group for electricity, medium voltage	0.30754	remind - SSP1-NDC - 2040	RAS	kilowatt hour		technosphere	electricity, medium voltage
preperation for recycling, steel scrap, from fossil infrastructure, 2040	1.1355	steel_prod_SSP1-NDC	GLO	kilogram		technosphere	steel scrap, from fossil infrastructure
treatment of electric arc furnace dust, residual material landfill, optimistic, 2040	-0.0191274	steel_prod_SSP1-NDC	RoW	kilogram		technosphere	electric arc furnace dust
treatment of electric arc furnace slag, chromium steel, residual material landfill, optimistic, 2040	-0.165106	steel_prod_SSP1-NDC	GLO	kilogram		technosphere	electric arc furnace slag
Activity	steel production, electric, chromium steel 18/8, optimistic, 2045
code	31f972a1baf74359bd53b939f4ceaa32
comment	This dataset has been modified by `premise`, according to the performance for steel production indicated by the IAM model REMIND for the IAM region World in 2100, following the scenario SSP1-NDC. The energy efficiency of the process has been improved by 28%.Background: This activity represents the production of stainless steel (Type 304, aka. 18/8; assumed composition 68.6% Fe, 9.3% Ni, 19.0% Cr …
location	World
reference product	steel, chromium steel 18/8
scenario	SSP1-NDC
type	process
unit	kilogram
worksheet name	steel_prod_SSP1-NDC
year	2045
Exchanges
name	amount	database	location	unit	categories	type	reference product
Benzene	3.63318e-07			kilogram	air	biosphere
Benzene, hexachloro-	1.54919e-09			kilogram	air	biosphere
Cadmium II	1.21655e-08			kilogram	air	biosphere
Carbon dioxide, fossil	0.033168			kilogram	air	biosphere
Carbon dioxide, non-fossil	9.475e-05			kilogram	air	biosphere
Carbon monoxide, fossil	0.000474342			kilogram	air	biosphere
Chromium III	1.83303e-07			kilogram	air	biosphere
Copper ion	7.48999e-08			kilogram	air	biosphere
Dioxins, measured as 2,3,7,8-tetrachlorodibenzo-p-dioxin	4.89898e-13			kilogram	air	biosphere
Hydrocarbons, aromatic	7.7008e-05			kilogram	air	biosphere
Hydrochloric acid	5.31037e-06			kilogram	air	biosphere
Hydrogen fluoride	2.44949e-08			kilogram	air	biosphere
Lead II	4.62331e-07			kilogram	air	biosphere
Mercury II	2e-08			kilogram	air	biosphere
Nickel II	7.74597e-08			kilogram	air	biosphere
Nitrogen oxides	7.73305e-05			kilogram	air	biosphere
PAH, polycyclic aromatic hydrocarbons	9.34345e-08			kilogram	air	biosphere
Particulate Matter, < 2.5 um	1.47224e-05			kilogram	air	biosphere
Particulate Matter, > 10 um	5.19615e-06			kilogram	air	biosphere
Particulate Matter, > 2.5 um and < 10um	1.47224e-05			kilogram	air	biosphere
Polychlorinated biphenyls	2.23607e-10			kilogram	air	biosphere
Sulfur dioxide	3.24037e-05			kilogram	air	biosphere
Water	0.0022952			cubic meter	water	biosphere
Water	0.00292117			cubic meter	air	biosphere
Water, cooling, unspecified natural origin	0.00654217			cubic meter	natural resource::in water	biosphere
Zinc II	2.19089e-06			kilogram	air	biosphere
steel production, electric, chromium steel 18/8, optimistic, 2045	1	steel_prod_SSP1-NDC	World	kilogram		production	steel, chromium steel 18/8
carbon dioxide, captured at steel production plant, with underground storage, post, 200 km	3.44109e-05	remind - SSP1-NDC - 2045	World	kilogram		technosphere	carbon dioxide, captured and stored
market for anode, for metal electrolysis	0.004	remind - SSP1-NDC - 2045	GLO	kilogram		technosphere	anode, for metal electrolysis
market for argon, liquid	0.032	remind - SSP1-NDC - 2045	RoW	kilogram		technosphere	argon, liquid
market for electric arc furnace converter	4e-11	remind - SSP1-NDC - 2045	GLO	unit		technosphere	electric arc furnace converter
market for electric arc furnace dust	0	remind - SSP1-NDC - 2045	RoW	kilogram		technosphere	electric arc furnace dust
market for electric arc furnace secondary metallurgy slag	0	remind - SSP1-NDC - 2045	RoW	kilogram		technosphere	electric arc furnace secondary metallurgy slag
market for electric arc furnace slag	0	remind - SSP1-NDC - 2045	RoW	kilogram		technosphere	electric arc furnace slag
market for electricity, medium voltage	0.000998198	remind - SSP1-NDC - 2045	NZ	kilowatt hour		technosphere	electricity, medium voltage
market for electricity, medium voltage	0.00509321	remind - SSP1-NDC - 2045	AU	kilowatt hour		technosphere	electricity, medium voltage
market for ferrochromium, high-carbon, 68% Cr	0	remind - SSP1-NDC - 2045	GLO	kilogram		technosphere	ferrochromium, high-carbon, 68% Cr
market for ferronickel	0	remind - SSP1-NDC - 2045	GLO	kilogram		technosphere	ferronickel
market for hard coal	0.00691265	remind - SSP1-NDC - 2045	RoW	kilogram		technosphere	hard coal
market for hot rolling, steel	1	remind - SSP1-NDC - 2045	GLO	kilogram		technosphere	hot rolling, steel
market for inert waste, for final disposal	-0.00678233	remind - SSP1-NDC - 2045	RoW	kilogram		technosphere	inert waste, for final disposal
market for iron scrap, sorted, pressed	0	remind - SSP1-NDC - 2045	RoW	kilogram		technosphere	iron scrap, sorted, pressed
market for natural gas, high pressure	0.00564357	remind - SSP1-NDC - 2045	RoW	cubic meter		technosphere	natural gas, high pressure
market for nitrogen, liquid	0.00359723	remind - SSP1-NDC - 2045	RoW	kilogram		technosphere	nitrogen, liquid
market for oxygen, liquid	0.036	remind - SSP1-NDC - 2045	World	kilogram		technosphere	oxygen, liquid
market for quicklime, in pieces, loose	0.0591608	remind - SSP1-NDC - 2045	RoW	kilogram		technosphere	quicklime, in pieces, loose
market for refractory, basic, packed	0.0154919	remind - SSP1-NDC - 2045	GLO	kilogram		technosphere	refractory, basic, packed
market group for electricity, medium voltage	0.0335191	remind - SSP1-NDC - 2045	RLA	kilowatt hour		technosphere	electricity, medium voltage
market group for electricity, medium voltage	0.107422	remind - SSP1-NDC - 2045	RNA	kilowatt hour		technosphere	electricity, medium voltage
market group for electricity, medium voltage	0.016822	remind - SSP1-NDC - 2045	RAF	kilowatt hour		technosphere	electricity, medium voltage
market group for electricity, medium voltage	0.30754	remind - SSP1-NDC - 2045	RAS	kilowatt hour		technosphere	electricity, medium voltage
preperation for recycling, steel scrap, from fossil infrastructure, 2045	1.1355	steel_prod_SSP1-NDC	GLO	kilogram		technosphere	steel scrap, from fossil infrastructure
treatment of electric arc furnace dust, residual material landfill, optimistic, 2045	-0.0191274	steel_prod_SSP1-NDC	RoW	kilogram		technosphere	electric arc furnace dust
treatment of electric arc furnace slag, chromium steel, residual material landfill, optimistic, 2045	-0.165106	steel_prod_SSP1-NDC	GLO	kilogram		technosphere	electric arc furnace slag
Activity	steel production, electric, chromium steel 18/8, optimistic, 2050
code	08083566e57949559c146008f278de02
comment	This dataset has been modified by `premise`, according to the performance for steel production indicated by the IAM model REMIND for the IAM region World in 2100, following the scenario SSP1-NDC. The energy efficiency of the process has been improved by 28%.Background: This activity represents the production of stainless steel (Type 304, aka. 18/8; assumed composition 68.6% Fe, 9.3% Ni, 19.0% Cr …
location	World
reference product	steel, chromium steel 18/8
scenario	SSP1-NDC
type	process
unit	kilogram
worksheet name	steel_prod_SSP1-NDC
year	2050
Exchanges
name	amount	database	location	unit	categories	type	reference product
Benzene	3.63318e-07			kilogram	air	biosphere
Benzene, hexachloro-	1.54919e-09			kilogram	air	biosphere
Cadmium II	1.21655e-08			kilogram	air	biosphere
Carbon dioxide, fossil	0.033168			kilogram	air	biosphere
Carbon dioxide, non-fossil	9.475e-05			kilogram	air	biosphere
Carbon monoxide, fossil	0.000474342			kilogram	air	biosphere
Chromium III	1.83303e-07			kilogram	air	biosphere
Copper ion	7.48999e-08			kilogram	air	biosphere
Dioxins, measured as 2,3,7,8-tetrachlorodibenzo-p-dioxin	4.89898e-13			kilogram	air	biosphere
Hydrocarbons, aromatic	7.7008e-05			kilogram	air	biosphere
Hydrochloric acid	5.31037e-06			kilogram	air	biosphere
Hydrogen fluoride	2.44949e-08			kilogram	air	biosphere
Lead II	4.62331e-07			kilogram	air	biosphere
Mercury II	2e-08			kilogram	air	biosphere
Nickel II	7.74597e-08			kilogram	air	biosphere
Nitrogen oxides	7.73305e-05			kilogram	air	biosphere
PAH, polycyclic aromatic hydrocarbons	9.34345e-08			kilogram	air	biosphere
Particulate Matter, < 2.5 um	1.47224e-05			kilogram	air	biosphere
Particulate Matter, > 10 um	5.19615e-06			kilogram	air	biosphere
Particulate Matter, > 2.5 um and < 10um	1.47224e-05			kilogram	air	biosphere
Polychlorinated biphenyls	2.23607e-10			kilogram	air	biosphere
Sulfur dioxide	3.24037e-05			kilogram	air	biosphere
Water	0.0022952			cubic meter	water	biosphere
Water	0.00292117			cubic meter	air	biosphere
Water, cooling, unspecified natural origin	0.00654217			cubic meter	natural resource::in water	biosphere
Zinc II	2.19089e-06			kilogram	air	biosphere
steel production, electric, chromium steel 18/8, optimistic, 2050	1	steel_prod_SSP1-NDC	World	kilogram		production	steel, chromium steel 18/8
carbon dioxide, captured at steel production plant, with underground storage, post, 200 km	3.44109e-05	remind - SSP1-NDC - 2050	World	kilogram		technosphere	carbon dioxide, captured and stored
market for anode, for metal electrolysis	0.004	remind - SSP1-NDC - 2050	GLO	kilogram		technosphere	anode, for metal electrolysis
market for argon, liquid	0.032	remind - SSP1-NDC - 2050	RoW	kilogram		technosphere	argon, liquid
market for electric arc furnace converter	4e-11	remind - SSP1-NDC - 2050	GLO	unit		technosphere	electric arc furnace converter
market for electric arc furnace dust	0	remind - SSP1-NDC - 2050	RoW	kilogram		technosphere	electric arc furnace dust
market for electric arc furnace secondary metallurgy slag	0	remind - SSP1-NDC - 2050	RoW	kilogram		technosphere	electric arc furnace secondary metallurgy slag
market for electric arc furnace slag	0	remind - SSP1-NDC - 2050	RoW	kilogram		technosphere	electric arc furnace slag
market for electricity, medium voltage	0.000998198	remind - SSP1-NDC - 2050	NZ	kilowatt hour		technosphere	electricity, medium voltage
market for electricity, medium voltage	0.00509321	remind - SSP1-NDC - 2050	AU	kilowatt hour		technosphere	electricity, medium voltage
market for ferrochromium, high-carbon, 68% Cr	0	remind - SSP1-NDC - 2050	GLO	kilogram		technosphere	ferrochromium, high-carbon, 68% Cr
market for ferronickel	0	remind - SSP1-NDC - 2050	GLO	kilogram		technosphere	ferronickel
market for hard coal	0.00691265	remind - SSP1-NDC - 2050	RoW	kilogram		technosphere	hard coal
market for hot rolling, steel	1	remind - SSP1-NDC - 2050	GLO	kilogram		technosphere	hot rolling, steel
market for inert waste, for final disposal	-0.00678233	remind - SSP1-NDC - 2050	RoW	kilogram		technosphere	inert waste, for final disposal
market for iron scrap, sorted, pressed	0	remind - SSP1-NDC - 2050	RoW	kilogram		technosphere	iron scrap, sorted, pressed
market for natural gas, high pressure	0.00564357	remind - SSP1-NDC - 2050	RoW	cubic meter		technosphere	natural gas, high pressure
market for nitrogen, liquid	0.00359723	remind - SSP1-NDC - 2050	RoW	kilogram		technosphere	nitrogen, liquid
market for oxygen, liquid	0.036	remind - SSP1-NDC - 2050	World	kilogram		technosphere	oxygen, liquid
market for quicklime, in pieces, loose	0.0591608	remind - SSP1-NDC - 2050	RoW	kilogram		technosphere	quicklime, in pieces, loose
market for refractory, basic, packed	0.0154919	remind - SSP1-NDC - 2050	GLO	kilogram		technosphere	refractory, basic, packed
market group for electricity, medium voltage	0.0335191	remind - SSP1-NDC - 2050	RLA	kilowatt hour		technosphere	electricity, medium voltage
market group for electricity, medium voltage	0.107422	remind - SSP1-NDC - 2050	RNA	kilowatt hour		technosphere	electricity, medium voltage
market group for electricity, medium voltage	0.016822	remind - SSP1-NDC - 2050	RAF	kilowatt hour		technosphere	electricity, medium voltage
market group for electricity, medium voltage	0.30754	remind - SSP1-NDC - 2050	RAS	kilowatt hour		technosphere	electricity, medium voltage
preperation for recycling, steel scrap, from fossil infrastructure, 2050	1.1355	steel_prod_SSP1-NDC	GLO	kilogram		technosphere	steel scrap, from fossil infrastructure
treatment of electric arc furnace dust, residual material landfill, optimistic, 2050	-0.0191274	steel_prod_SSP1-NDC	RoW	kilogram		technosphere	electric arc furnace dust
treatment of electric arc furnace slag, chromium steel, residual material landfill, optimistic, 2050	-0.165106	steel_prod_SSP1-NDC	GLO	kilogram		technosphere	electric arc furnace slag
Activity	steel production, electric, chromium steel 18/8, pessimistic, 2025
code	8ee1fadc8ab44abca69409f2d2e1930b
comment	This dataset has been modified by `premise`, according to the performance for steel production indicated by the IAM model REMIND for the IAM region World in 2100, following the scenario SSP1-NDC. The energy efficiency of the process has been improved by 28%.Background: This activity represents the production of stainless steel (Type 304, aka. 18/8; assumed composition 68.6% Fe, 9.3% Ni, 19.0% Cr …
location	World
reference product	steel, chromium steel 18/8
scenario	SSP1-NDC
type	process
unit	kilogram
worksheet name	steel_prod_SSP1-NDC
year	2025
Exchanges
name	amount	database	location	unit	categories	type	reference product
Benzene	3.63318e-07			kilogram	air	biosphere
Benzene, hexachloro-	1.54919e-09			kilogram	air	biosphere
Cadmium II	1.21655e-08			kilogram	air	biosphere
Carbon dioxide, fossil	0.033168			kilogram	air	biosphere
Carbon dioxide, non-fossil	9.475e-05			kilogram	air	biosphere
Carbon monoxide, fossil	0.000474342			kilogram	air	biosphere
Chromium III	1.83303e-07			kilogram	air	biosphere
Copper ion	7.48999e-08			kilogram	air	biosphere
Dioxins, measured as 2,3,7,8-tetrachlorodibenzo-p-dioxin	4.89898e-13			kilogram	air	biosphere
Hydrocarbons, aromatic	7.7008e-05			kilogram	air	biosphere
Hydrochloric acid	5.31037e-06			kilogram	air	biosphere
Hydrogen fluoride	2.44949e-08			kilogram	air	biosphere
Lead II	4.62331e-07			kilogram	air	biosphere
Mercury II	2e-08			kilogram	air	biosphere
Nickel II	7.74597e-08			kilogram	air	biosphere
Nitrogen oxides	7.73305e-05			kilogram	air	biosphere
PAH, polycyclic aromatic hydrocarbons	9.34345e-08			kilogram	air	biosphere
Particulate Matter, < 2.5 um	1.47224e-05			kilogram	air	biosphere
Particulate Matter, > 10 um	5.19615e-06			kilogram	air	biosphere
Particulate Matter, > 2.5 um and < 10um	1.47224e-05			kilogram	air	biosphere
Polychlorinated biphenyls	2.23607e-10			kilogram	air	biosphere
Sulfur dioxide	3.24037e-05			kilogram	air	biosphere
Water	0.0022952			cubic meter	water	biosphere
Water	0.00292117			cubic meter	air	biosphere
Water, cooling, unspecified natural origin	0.00654217			cubic meter	natural resource::in water	biosphere
Zinc II	2.19089e-06			kilogram	air	biosphere
steel production, electric, chromium steel 18/8, pessimistic, 2025	1	steel_prod_SSP1-NDC	World	kilogram		production	steel, chromium steel 18/8
carbon dioxide, captured at steel production plant, with underground storage, post, 200 km	3.44109e-05	remind - SSP1-NDC - 2025	World	kilogram		technosphere	carbon dioxide, captured and stored
market for anode, for metal electrolysis	0.004	remind - SSP1-NDC - 2025	GLO	kilogram		technosphere	anode, for metal electrolysis
market for argon, liquid	0.032	remind - SSP1-NDC - 2025	RoW	kilogram		technosphere	argon, liquid
market for electric arc furnace converter	4e-11	remind - SSP1-NDC - 2025	GLO	unit		technosphere	electric arc furnace converter
market for electricity, medium voltage	0.000998198	remind - SSP1-NDC - 2025	NZ	kilowatt hour		technosphere	electricity, medium voltage
market for electricity, medium voltage	0.00509321	remind - SSP1-NDC - 2025	AU	kilowatt hour		technosphere	electricity, medium voltage
market for ferrochromium, high-carbon, 68% Cr	0.26471	remind - SSP1-NDC - 2025	GLO	kilogram		technosphere	ferrochromium, high-carbon, 68% Cr
market for ferronickel	0.32	remind - SSP1-NDC - 2025	GLO	kilogram		technosphere	ferronickel
market for hard coal	0.00691265	remind - SSP1-NDC - 2025	RoW	kilogram		technosphere	hard coal
market for hot rolling, steel	1	remind - SSP1-NDC - 2025	GLO	kilogram		technosphere	hot rolling, steel
market for inert waste, for final disposal	-0.00678233	remind - SSP1-NDC - 2025	RoW	kilogram		technosphere	inert waste, for final disposal
market for natural gas, high pressure	0.00564357	remind - SSP1-NDC - 2025	RoW	cubic meter		technosphere	natural gas, high pressure
market for nitrogen, liquid	0.00359723	remind - SSP1-NDC - 2025	RoW	kilogram		technosphere	nitrogen, liquid
market for oxygen, liquid	0.036	remind - SSP1-NDC - 2025	World	kilogram		technosphere	oxygen, liquid
market for quicklime, in pieces, loose	0.0591608	remind - SSP1-NDC - 2025	RoW	kilogram		technosphere	quicklime, in pieces, loose
market for refractory, basic, packed	0.0154919	remind - SSP1-NDC - 2025	GLO	kilogram		technosphere	refractory, basic, packed
market group for electricity, medium voltage	0.0335191	remind - SSP1-NDC - 2025	RLA	kilowatt hour		technosphere	electricity, medium voltage
market group for electricity, medium voltage	0.107422	remind - SSP1-NDC - 2025	RNA	kilowatt hour		technosphere	electricity, medium voltage
market group for electricity, medium voltage	0.016822	remind - SSP1-NDC - 2025	RAF	kilowatt hour		technosphere	electricity, medium voltage
market group for electricity, medium voltage	0.30754	remind - SSP1-NDC - 2025	RAS	kilowatt hour		technosphere	electricity, medium voltage
preperation for recycling, steel scrap, from fossil infrastructure, 2025	0.55079	steel_prod_SSP1-NDC	GLO	kilogram		technosphere	steel scrap, from fossil infrastructure
treatment of electric arc furnace dust, residual material landfill, pessimistic, 2025	-0.0191274	steel_prod_SSP1-NDC	RoW	kilogram		technosphere	electric arc furnace dust
treatment of electric arc furnace slag, chromium steel, residual material landfill, pessimistic, 2025	-0.165106	steel_prod_SSP1-NDC	GLO	kilogram		technosphere	electric arc furnace slag
Activity	steel production, electric, chromium steel 18/8, pessimistic, 2030
code	3c61e9fa0a244e32acd4a45f8dda2fba
comment	This dataset has been modified by `premise`, according to the performance for steel production indicated by the IAM model REMIND for the IAM region World in 2100, following the scenario SSP1-NDC. The energy efficiency of the process has been improved by 28%.Background: This activity represents the production of stainless steel (Type 304, aka. 18/8; assumed composition 68.6% Fe, 9.3% Ni, 19.0% Cr …
location	World
reference product	steel, chromium steel 18/8
scenario	SSP1-NDC
type	process
unit	kilogram
worksheet name	steel_prod_SSP1-NDC
year	2030
Exchanges
name	amount	database	location	unit	categories	type	reference product
Benzene	3.63318e-07			kilogram	air	biosphere
Benzene, hexachloro-	1.54919e-09			kilogram	air	biosphere
Cadmium II	1.21655e-08			kilogram	air	biosphere
Carbon dioxide, fossil	0.033168			kilogram	air	biosphere
Carbon dioxide, non-fossil	9.475e-05			kilogram	air	biosphere
Carbon monoxide, fossil	0.000474342			kilogram	air	biosphere
Chromium III	1.83303e-07			kilogram	air	biosphere
Copper ion	7.48999e-08			kilogram	air	biosphere
Dioxins, measured as 2,3,7,8-tetrachlorodibenzo-p-dioxin	4.89898e-13			kilogram	air	biosphere
Hydrocarbons, aromatic	7.7008e-05			kilogram	air	biosphere
Hydrochloric acid	5.31037e-06			kilogram	air	biosphere
Hydrogen fluoride	2.44949e-08			kilogram	air	biosphere
Lead II	4.62331e-07			kilogram	air	biosphere
Mercury II	2e-08			kilogram	air	biosphere
Nickel II	7.74597e-08			kilogram	air	biosphere
Nitrogen oxides	7.73305e-05			kilogram	air	biosphere
PAH, polycyclic aromatic hydrocarbons	9.34345e-08			kilogram	air	biosphere
Particulate Matter, < 2.5 um	1.47224e-05			kilogram	air	biosphere
Particulate Matter, > 10 um	5.19615e-06			kilogram	air	biosphere
Particulate Matter, > 2.5 um and < 10um	1.47224e-05			kilogram	air	biosphere
Polychlorinated biphenyls	2.23607e-10			kilogram	air	biosphere
Sulfur dioxide	3.24037e-05			kilogram	air	biosphere
Water	0.0022952			cubic meter	water	biosphere
Water	0.00292117			cubic meter	air	biosphere
Water, cooling, unspecified natural origin	0.00654217			cubic meter	natural resource::in water	biosphere
Zinc II	2.19089e-06			kilogram	air	biosphere
steel production, electric, chromium steel 18/8, pessimistic, 2030	1	steel_prod_SSP1-NDC	World	kilogram		production	steel, chromium steel 18/8
carbon dioxide, captured at steel production plant, with underground storage, post, 200 km	3.44109e-05	remind - SSP1-NDC - 2030	World	kilogram		technosphere	carbon dioxide, captured and stored
market for anode, for metal electrolysis	0.004	remind - SSP1-NDC - 2030	GLO	kilogram		technosphere	anode, for metal electrolysis
market for argon, liquid	0.032	remind - SSP1-NDC - 2030	RoW	kilogram		technosphere	argon, liquid
market for electric arc furnace converter	4e-11	remind - SSP1-NDC - 2030	GLO	unit		technosphere	electric arc furnace converter
market for electricity, medium voltage	0.000998198	remind - SSP1-NDC - 2030	NZ	kilowatt hour		technosphere	electricity, medium voltage
market for electricity, medium voltage	0.00509321	remind - SSP1-NDC - 2030	AU	kilowatt hour		technosphere	electricity, medium voltage
market for ferrochromium, high-carbon, 68% Cr	0.26471	remind - SSP1-NDC - 2030	GLO	kilogram		technosphere	ferrochromium, high-carbon, 68% Cr
market for ferronickel	0.32	remind - SSP1-NDC - 2030	GLO	kilogram		technosphere	ferronickel
market for hard coal	0.00691265	remind - SSP1-NDC - 2030	RoW	kilogram		technosphere	hard coal
market for hot rolling, steel	1	remind - SSP1-NDC - 2030	GLO	kilogram		technosphere	hot rolling, steel
market for inert waste, for final disposal	-0.00678233	remind - SSP1-NDC - 2030	RoW	kilogram		technosphere	inert waste, for final disposal
market for natural gas, high pressure	0.00564357	remind - SSP1-NDC - 2030	RoW	cubic meter		technosphere	natural gas, high pressure
market for nitrogen, liquid	0.00359723	remind - SSP1-NDC - 2030	RoW	kilogram		technosphere	nitrogen, liquid
market for oxygen, liquid	0.036	remind - SSP1-NDC - 2030	World	kilogram		technosphere	oxygen, liquid
market for quicklime, in pieces, loose	0.0591608	remind - SSP1-NDC - 2030	RoW	kilogram		technosphere	quicklime, in pieces, loose
market for refractory, basic, packed	0.0154919	remind - SSP1-NDC - 2030	GLO	kilogram		technosphere	refractory, basic, packed
market group for electricity, medium voltage	0.0335191	remind - SSP1-NDC - 2030	RLA	kilowatt hour		technosphere	electricity, medium voltage
market group for electricity, medium voltage	0.107422	remind - SSP1-NDC - 2030	RNA	kilowatt hour		technosphere	electricity, medium voltage
market group for electricity, medium voltage	0.016822	remind - SSP1-NDC - 2030	RAF	kilowatt hour		technosphere	electricity, medium voltage
market group for electricity, medium voltage	0.30754	remind - SSP1-NDC - 2030	RAS	kilowatt hour		technosphere	electricity, medium voltage
preperation for recycling, steel scrap, from fossil infrastructure, 2030	0.55079	steel_prod_SSP1-NDC	GLO	kilogram		technosphere	steel scrap, from fossil infrastructure
treatment of electric arc furnace dust, residual material landfill, pessimistic, 2030	-0.0191274	steel_prod_SSP1-NDC	RoW	kilogram		technosphere	electric arc furnace dust
treatment of electric arc furnace slag, chromium steel, residual material landfill, pessimistic, 2030	-0.165106	steel_prod_SSP1-NDC	GLO	kilogram		technosphere	electric arc furnace slag
Activity	steel production, electric, chromium steel 18/8, pessimistic, 2035
code	55d1f8aca6574671b3502440515118e8
comment	This dataset has been modified by `premise`, according to the performance for steel production indicated by the IAM model REMIND for the IAM region World in 2100, following the scenario SSP1-NDC. The energy efficiency of the process has been improved by 28%.Background: This activity represents the production of stainless steel (Type 304, aka. 18/8; assumed composition 68.6% Fe, 9.3% Ni, 19.0% Cr …
location	World
reference product	steel, chromium steel 18/8
scenario	SSP1-NDC
type	process
unit	kilogram
worksheet name	steel_prod_SSP1-NDC
year	2035
Exchanges
name	amount	database	location	unit	categories	type	reference product
Benzene	3.63318e-07			kilogram	air	biosphere
Benzene, hexachloro-	1.54919e-09			kilogram	air	biosphere
Cadmium II	1.21655e-08			kilogram	air	biosphere
Carbon dioxide, fossil	0.033168			kilogram	air	biosphere
Carbon dioxide, non-fossil	9.475e-05			kilogram	air	biosphere
Carbon monoxide, fossil	0.000474342			kilogram	air	biosphere
Chromium III	1.83303e-07			kilogram	air	biosphere
Copper ion	7.48999e-08			kilogram	air	biosphere
Dioxins, measured as 2,3,7,8-tetrachlorodibenzo-p-dioxin	4.89898e-13			kilogram	air	biosphere
Hydrocarbons, aromatic	7.7008e-05			kilogram	air	biosphere
Hydrochloric acid	5.31037e-06			kilogram	air	biosphere
Hydrogen fluoride	2.44949e-08			kilogram	air	biosphere
Lead II	4.62331e-07			kilogram	air	biosphere
Mercury II	2e-08			kilogram	air	biosphere
Nickel II	7.74597e-08			kilogram	air	biosphere
Nitrogen oxides	7.73305e-05			kilogram	air	biosphere
PAH, polycyclic aromatic hydrocarbons	9.34345e-08			kilogram	air	biosphere
Particulate Matter, < 2.5 um	1.47224e-05			kilogram	air	biosphere
Particulate Matter, > 10 um	5.19615e-06			kilogram	air	biosphere
Particulate Matter, > 2.5 um and < 10um	1.47224e-05			kilogram	air	biosphere
Polychlorinated biphenyls	2.23607e-10			kilogram	air	biosphere
Sulfur dioxide	3.24037e-05			kilogram	air	biosphere
Water	0.0022952			cubic meter	water	biosphere
Water	0.00292117			cubic meter	air	biosphere
Water, cooling, unspecified natural origin	0.00654217			cubic meter	natural resource::in water	biosphere
Zinc II	2.19089e-06			kilogram	air	biosphere
steel production, electric, chromium steel 18/8, pessimistic, 2035	1	steel_prod_SSP1-NDC	World	kilogram		production	steel, chromium steel 18/8
carbon dioxide, captured at steel production plant, with underground storage, post, 200 km	3.44109e-05	remind - SSP1-NDC - 2035	World	kilogram		technosphere	carbon dioxide, captured and stored
market for anode, for metal electrolysis	0.004	remind - SSP1-NDC - 2035	GLO	kilogram		technosphere	anode, for metal electrolysis
market for argon, liquid	0.032	remind - SSP1-NDC - 2035	RoW	kilogram		technosphere	argon, liquid
market for electric arc furnace converter	4e-11	remind - SSP1-NDC - 2035	GLO	unit		technosphere	electric arc furnace converter
market for electricity, medium voltage	0.000998198	remind - SSP1-NDC - 2035	NZ	kilowatt hour		technosphere	electricity, medium voltage
market for electricity, medium voltage	0.00509321	remind - SSP1-NDC - 2035	AU	kilowatt hour		technosphere	electricity, medium voltage
market for ferrochromium, high-carbon, 68% Cr	0.26471	remind - SSP1-NDC - 2035	GLO	kilogram		technosphere	ferrochromium, high-carbon, 68% Cr
market for ferronickel	0.32	remind - SSP1-NDC - 2035	GLO	kilogram		technosphere	ferronickel
market for hard coal	0.00691265	remind - SSP1-NDC - 2035	RoW	kilogram		technosphere	hard coal
market for hot rolling, steel	1	remind - SSP1-NDC - 2035	GLO	kilogram		technosphere	hot rolling, steel
market for inert waste, for final disposal	-0.00678233	remind - SSP1-NDC - 2035	RoW	kilogram		technosphere	inert waste, for final disposal
market for natural gas, high pressure	0.00564357	remind - SSP1-NDC - 2035	RoW	cubic meter		technosphere	natural gas, high pressure
market for nitrogen, liquid	0.00359723	remind - SSP1-NDC - 2035	RoW	kilogram		technosphere	nitrogen, liquid
market for oxygen, liquid	0.036	remind - SSP1-NDC - 2035	World	kilogram		technosphere	oxygen, liquid
market for quicklime, in pieces, loose	0.0591608	remind - SSP1-NDC - 2035	RoW	kilogram		technosphere	quicklime, in pieces, loose
market for refractory, basic, packed	0.0154919	remind - SSP1-NDC - 2035	GLO	kilogram		technosphere	refractory, basic, packed
market group for electricity, medium voltage	0.0335191	remind - SSP1-NDC - 2035	RLA	kilowatt hour		technosphere	electricity, medium voltage
market group for electricity, medium voltage	0.107422	remind - SSP1-NDC - 2035	RNA	kilowatt hour		technosphere	electricity, medium voltage
market group for electricity, medium voltage	0.016822	remind - SSP1-NDC - 2035	RAF	kilowatt hour		technosphere	electricity, medium voltage
market group for electricity, medium voltage	0.30754	remind - SSP1-NDC - 2035	RAS	kilowatt hour		technosphere	electricity, medium voltage
preperation for recycling, steel scrap, from fossil infrastructure, 2035	0.55079	steel_prod_SSP1-NDC	GLO	kilogram		technosphere	steel scrap, from fossil infrastructure
treatment of electric arc furnace dust, residual material landfill, pessimistic, 2035	-0.0191274	steel_prod_SSP1-NDC	RoW	kilogram		technosphere	electric arc furnace dust
treatment of electric arc furnace slag, chromium steel, residual material landfill, pessimistic, 2035	-0.165106	steel_prod_SSP1-NDC	GLO	kilogram		technosphere	electric arc furnace slag
Activity	steel production, electric, chromium steel 18/8, pessimistic, 2040
code	5b81c8b84561463da6332e1ab286e2f9
comment	This dataset has been modified by `premise`, according to the performance for steel production indicated by the IAM model REMIND for the IAM region World in 2100, following the scenario SSP1-NDC. The energy efficiency of the process has been improved by 28%.Background: This activity represents the production of stainless steel (Type 304, aka. 18/8; assumed composition 68.6% Fe, 9.3% Ni, 19.0% Cr …
location	World
reference product	steel, chromium steel 18/8
scenario	SSP1-NDC
type	process
unit	kilogram
worksheet name	steel_prod_SSP1-NDC
year	2040
Exchanges
name	amount	database	location	unit	categories	type	reference product
Benzene	3.63318e-07			kilogram	air	biosphere
Benzene, hexachloro-	1.54919e-09			kilogram	air	biosphere
Cadmium II	1.21655e-08			kilogram	air	biosphere
Carbon dioxide, fossil	0.033168			kilogram	air	biosphere
Carbon dioxide, non-fossil	9.475e-05			kilogram	air	biosphere
Carbon monoxide, fossil	0.000474342			kilogram	air	biosphere
Chromium III	1.83303e-07			kilogram	air	biosphere
Copper ion	7.48999e-08			kilogram	air	biosphere
Dioxins, measured as 2,3,7,8-tetrachlorodibenzo-p-dioxin	4.89898e-13			kilogram	air	biosphere
Hydrocarbons, aromatic	7.7008e-05			kilogram	air	biosphere
Hydrochloric acid	5.31037e-06			kilogram	air	biosphere
Hydrogen fluoride	2.44949e-08			kilogram	air	biosphere
Lead II	4.62331e-07			kilogram	air	biosphere
Mercury II	2e-08			kilogram	air	biosphere
Nickel II	7.74597e-08			kilogram	air	biosphere
Nitrogen oxides	7.73305e-05			kilogram	air	biosphere
PAH, polycyclic aromatic hydrocarbons	9.34345e-08			kilogram	air	biosphere
Particulate Matter, < 2.5 um	1.47224e-05			kilogram	air	biosphere
Particulate Matter, > 10 um	5.19615e-06			kilogram	air	biosphere
Particulate Matter, > 2.5 um and < 10um	1.47224e-05			kilogram	air	biosphere
Polychlorinated biphenyls	2.23607e-10			kilogram	air	biosphere
Sulfur dioxide	3.24037e-05			kilogram	air	biosphere
Water	0.0022952			cubic meter	water	biosphere
Water	0.00292117			cubic meter	air	biosphere
Water, cooling, unspecified natural origin	0.00654217			cubic meter	natural resource::in water	biosphere
Zinc II	2.19089e-06			kilogram	air	biosphere
steel production, electric, chromium steel 18/8, pessimistic, 2040	1	steel_prod_SSP1-NDC	World	kilogram		production	steel, chromium steel 18/8
carbon dioxide, captured at steel production plant, with underground storage, post, 200 km	3.44109e-05	remind - SSP1-NDC - 2040	World	kilogram		technosphere	carbon dioxide, captured and stored
market for anode, for metal electrolysis	0.004	remind - SSP1-NDC - 2040	GLO	kilogram		technosphere	anode, for metal electrolysis
market for argon, liquid	0.032	remind - SSP1-NDC - 2040	RoW	kilogram		technosphere	argon, liquid
market for electric arc furnace converter	4e-11	remind - SSP1-NDC - 2040	GLO	unit		technosphere	electric arc furnace converter
market for electricity, medium voltage	0.000998198	remind - SSP1-NDC - 2040	NZ	kilowatt hour		technosphere	electricity, medium voltage
market for electricity, medium voltage	0.00509321	remind - SSP1-NDC - 2040	AU	kilowatt hour		technosphere	electricity, medium voltage
market for ferrochromium, high-carbon, 68% Cr	0.26471	remind - SSP1-NDC - 2040	GLO	kilogram		technosphere	ferrochromium, high-carbon, 68% Cr
market for ferronickel	0.32	remind - SSP1-NDC - 2040	GLO	kilogram		technosphere	ferronickel
market for hard coal	0.00691265	remind - SSP1-NDC - 2040	RoW	kilogram		technosphere	hard coal
market for hot rolling, steel	1	remind - SSP1-NDC - 2040	GLO	kilogram		technosphere	hot rolling, steel
market for inert waste, for final disposal	-0.00678233	remind - SSP1-NDC - 2040	RoW	kilogram		technosphere	inert waste, for final disposal
market for natural gas, high pressure	0.00564357	remind - SSP1-NDC - 2040	RoW	cubic meter		technosphere	natural gas, high pressure
market for nitrogen, liquid	0.00359723	remind - SSP1-NDC - 2040	RoW	kilogram		technosphere	nitrogen, liquid
market for oxygen, liquid	0.036	remind - SSP1-NDC - 2040	World	kilogram		technosphere	oxygen, liquid
market for quicklime, in pieces, loose	0.0591608	remind - SSP1-NDC - 2040	RoW	kilogram		technosphere	quicklime, in pieces, loose
market for refractory, basic, packed	0.0154919	remind - SSP1-NDC - 2040	GLO	kilogram		technosphere	refractory, basic, packed
market group for electricity, medium voltage	0.0335191	remind - SSP1-NDC - 2040	RLA	kilowatt hour		technosphere	electricity, medium voltage
market group for electricity, medium voltage	0.107422	remind - SSP1-NDC - 2040	RNA	kilowatt hour		technosphere	electricity, medium voltage
market group for electricity, medium voltage	0.016822	remind - SSP1-NDC - 2040	RAF	kilowatt hour		technosphere	electricity, medium voltage
market group for electricity, medium voltage	0.30754	remind - SSP1-NDC - 2040	RAS	kilowatt hour		technosphere	electricity, medium voltage
preperation for recycling, steel scrap, from fossil infrastructure, 2040	0.55079	steel_prod_SSP1-NDC	GLO	kilogram		technosphere	steel scrap, from fossil infrastructure
treatment of electric arc furnace dust, residual material landfill, pessimistic, 2040	-0.0191274	steel_prod_SSP1-NDC	RoW	kilogram		technosphere	electric arc furnace dust
treatment of electric arc furnace slag, chromium steel, residual material landfill, pessimistic, 2040	-0.165106	steel_prod_SSP1-NDC	GLO	kilogram		technosphere	electric arc furnace slag
Activity	steel production, electric, chromium steel 18/8, pessimistic, 2045
code	5d71696db499451086e7f275f80f4ba8
comment	This dataset has been modified by `premise`, according to the performance for steel production indicated by the IAM model REMIND for the IAM region World in 2100, following the scenario SSP1-NDC. The energy efficiency of the process has been improved by 28%.Background: This activity represents the production of stainless steel (Type 304, aka. 18/8; assumed composition 68.6% Fe, 9.3% Ni, 19.0% Cr …
location	World
reference product	steel, chromium steel 18/8
scenario	SSP1-NDC
type	process
unit	kilogram
worksheet name	steel_prod_SSP1-NDC
year	2045
Exchanges
name	amount	database	location	unit	categories	type	reference product
Benzene	3.63318e-07			kilogram	air	biosphere
Benzene, hexachloro-	1.54919e-09			kilogram	air	biosphere
Cadmium II	1.21655e-08			kilogram	air	biosphere
Carbon dioxide, fossil	0.033168			kilogram	air	biosphere
Carbon dioxide, non-fossil	9.475e-05			kilogram	air	biosphere
Carbon monoxide, fossil	0.000474342			kilogram	air	biosphere
Chromium III	1.83303e-07			kilogram	air	biosphere
Copper ion	7.48999e-08			kilogram	air	biosphere
Dioxins, measured as 2,3,7,8-tetrachlorodibenzo-p-dioxin	4.89898e-13			kilogram	air	biosphere
Hydrocarbons, aromatic	7.7008e-05			kilogram	air	biosphere
Hydrochloric acid	5.31037e-06			kilogram	air	biosphere
Hydrogen fluoride	2.44949e-08			kilogram	air	biosphere
Lead II	4.62331e-07			kilogram	air	biosphere
Mercury II	2e-08			kilogram	air	biosphere
Nickel II	7.74597e-08			kilogram	air	biosphere
Nitrogen oxides	7.73305e-05			kilogram	air	biosphere
PAH, polycyclic aromatic hydrocarbons	9.34345e-08			kilogram	air	biosphere
Particulate Matter, < 2.5 um	1.47224e-05			kilogram	air	biosphere
Particulate Matter, > 10 um	5.19615e-06			kilogram	air	biosphere
Particulate Matter, > 2.5 um and < 10um	1.47224e-05			kilogram	air	biosphere
Polychlorinated biphenyls	2.23607e-10			kilogram	air	biosphere
Sulfur dioxide	3.24037e-05			kilogram	air	biosphere
Water	0.0022952			cubic meter	water	biosphere
Water	0.00292117			cubic meter	air	biosphere
Water, cooling, unspecified natural origin	0.00654217			cubic meter	natural resource::in water	biosphere
Zinc II	2.19089e-06			kilogram	air	biosphere
steel production, electric, chromium steel 18/8, pessimistic, 2045	1	steel_prod_SSP1-NDC	World	kilogram		production	steel, chromium steel 18/8
carbon dioxide, captured at steel production plant, with underground storage, post, 200 km	3.44109e-05	remind - SSP1-NDC - 2045	World	kilogram		technosphere	carbon dioxide, captured and stored
market for anode, for metal electrolysis	0.004	remind - SSP1-NDC - 2045	GLO	kilogram		technosphere	anode, for metal electrolysis
market for argon, liquid	0.032	remind - SSP1-NDC - 2045	RoW	kilogram		technosphere	argon, liquid
market for electric arc furnace converter	4e-11	remind - SSP1-NDC - 2045	GLO	unit		technosphere	electric arc furnace converter
market for electricity, medium voltage	0.000998198	remind - SSP1-NDC - 2045	NZ	kilowatt hour		technosphere	electricity, medium voltage
market for electricity, medium voltage	0.00509321	remind - SSP1-NDC - 2045	AU	kilowatt hour		technosphere	electricity, medium voltage
market for ferrochromium, high-carbon, 68% Cr	0.26471	remind - SSP1-NDC - 2045	GLO	kilogram		technosphere	ferrochromium, high-carbon, 68% Cr
market for ferronickel	0.32	remind - SSP1-NDC - 2045	GLO	kilogram		technosphere	ferronickel
market for hard coal	0.00691265	remind - SSP1-NDC - 2045	RoW	kilogram		technosphere	hard coal
market for hot rolling, steel	1	remind - SSP1-NDC - 2045	GLO	kilogram		technosphere	hot rolling, steel
market for inert waste, for final disposal	-0.00678233	remind - SSP1-NDC - 2045	RoW	kilogram		technosphere	inert waste, for final disposal
market for natural gas, high pressure	0.00564357	remind - SSP1-NDC - 2045	RoW	cubic meter		technosphere	natural gas, high pressure
market for nitrogen, liquid	0.00359723	remind - SSP1-NDC - 2045	RoW	kilogram		technosphere	nitrogen, liquid
market for oxygen, liquid	0.036	remind - SSP1-NDC - 2045	World	kilogram		technosphere	oxygen, liquid
market for quicklime, in pieces, loose	0.0591608	remind - SSP1-NDC - 2045	RoW	kilogram		technosphere	quicklime, in pieces, loose
market for refractory, basic, packed	0.0154919	remind - SSP1-NDC - 2045	GLO	kilogram		technosphere	refractory, basic, packed
market group for electricity, medium voltage	0.0335191	remind - SSP1-NDC - 2045	RLA	kilowatt hour		technosphere	electricity, medium voltage
market group for electricity, medium voltage	0.107422	remind - SSP1-NDC - 2045	RNA	kilowatt hour		technosphere	electricity, medium voltage
market group for electricity, medium voltage	0.016822	remind - SSP1-NDC - 2045	RAF	kilowatt hour		technosphere	electricity, medium voltage
market group for electricity, medium voltage	0.30754	remind - SSP1-NDC - 2045	RAS	kilowatt hour		technosphere	electricity, medium voltage
preperation for recycling, steel scrap, from fossil infrastructure, 2045	0.55079	steel_prod_SSP1-NDC	GLO	kilogram		technosphere	steel scrap, from fossil infrastructure
treatment of electric arc furnace dust, residual material landfill, pessimistic, 2045	-0.0191274	steel_prod_SSP1-NDC	RoW	kilogram		technosphere	electric arc furnace dust
treatment of electric arc furnace slag, chromium steel, residual material landfill, pessimistic, 2045	-0.165106	steel_prod_SSP1-NDC	GLO	kilogram		technosphere	electric arc furnace slag
Activity	steel production, electric, chromium steel 18/8, pessimistic, 2050
code	b189f50bfd1044a881c519d0f66b77eb
comment	This dataset has been modified by `premise`, according to the performance for steel production indicated by the IAM model REMIND for the IAM region World in 2100, following the scenario SSP1-NDC. The energy efficiency of the process has been improved by 28%.Background: This activity represents the production of stainless steel (Type 304, aka. 18/8; assumed composition 68.6% Fe, 9.3% Ni, 19.0% Cr …
location	World
reference product	steel, chromium steel 18/8
scenario	SSP1-NDC
type	process
unit	kilogram
worksheet name	steel_prod_SSP1-NDC
year	2050
Exchanges
name	amount	database	location	unit	categories	type	reference product
Benzene	3.63318e-07			kilogram	air	biosphere
Benzene, hexachloro-	1.54919e-09			kilogram	air	biosphere
Cadmium II	1.21655e-08			kilogram	air	biosphere
Carbon dioxide, fossil	0.033168			kilogram	air	biosphere
Carbon dioxide, non-fossil	9.475e-05			kilogram	air	biosphere
Carbon monoxide, fossil	0.000474342			kilogram	air	biosphere
Chromium III	1.83303e-07			kilogram	air	biosphere
Copper ion	7.48999e-08			kilogram	air	biosphere
Dioxins, measured as 2,3,7,8-tetrachlorodibenzo-p-dioxin	4.89898e-13			kilogram	air	biosphere
Hydrocarbons, aromatic	7.7008e-05			kilogram	air	biosphere
Hydrochloric acid	5.31037e-06			kilogram	air	biosphere
Hydrogen fluoride	2.44949e-08			kilogram	air	biosphere
Lead II	4.62331e-07			kilogram	air	biosphere
Mercury II	2e-08			kilogram	air	biosphere
Nickel II	7.74597e-08			kilogram	air	biosphere
Nitrogen oxides	7.73305e-05			kilogram	air	biosphere
PAH, polycyclic aromatic hydrocarbons	9.34345e-08			kilogram	air	biosphere
Particulate Matter, < 2.5 um	1.47224e-05			kilogram	air	biosphere
Particulate Matter, > 10 um	5.19615e-06			kilogram	air	biosphere
Particulate Matter, > 2.5 um and < 10um	1.47224e-05			kilogram	air	biosphere
Polychlorinated biphenyls	2.23607e-10			kilogram	air	biosphere
Sulfur dioxide	3.24037e-05			kilogram	air	biosphere
Water	0.0022952			cubic meter	water	biosphere
Water	0.00292117			cubic meter	air	biosphere
Water, cooling, unspecified natural origin	0.00654217			cubic meter	natural resource::in water	biosphere
Zinc II	2.19089e-06			kilogram	air	biosphere
steel production, electric, chromium steel 18/8, pessimistic, 2050	1	steel_prod_SSP1-NDC	World	kilogram		production	steel, chromium steel 18/8
carbon dioxide, captured at steel production plant, with underground storage, post, 200 km	3.44109e-05	remind - SSP1-NDC - 2050	World	kilogram		technosphere	carbon dioxide, captured and stored
market for anode, for metal electrolysis	0.004	remind - SSP1-NDC - 2050	GLO	kilogram		technosphere	anode, for metal electrolysis
market for argon, liquid	0.032	remind - SSP1-NDC - 2050	RoW	kilogram		technosphere	argon, liquid
market for electric arc furnace converter	4e-11	remind - SSP1-NDC - 2050	GLO	unit		technosphere	electric arc furnace converter
market for electricity, medium voltage	0.000998198	remind - SSP1-NDC - 2050	NZ	kilowatt hour		technosphere	electricity, medium voltage
market for electricity, medium voltage	0.00509321	remind - SSP1-NDC - 2050	AU	kilowatt hour		technosphere	electricity, medium voltage
market for ferrochromium, high-carbon, 68% Cr	0.26471	remind - SSP1-NDC - 2050	GLO	kilogram		technosphere	ferrochromium, high-carbon, 68% Cr
market for ferronickel	0.32	remind - SSP1-NDC - 2050	GLO	kilogram		technosphere	ferronickel
market for hard coal	0.00691265	remind - SSP1-NDC - 2050	RoW	kilogram		technosphere	hard coal
market for hot rolling, steel	1	remind - SSP1-NDC - 2050	GLO	kilogram		technosphere	hot rolling, steel
market for inert waste, for final disposal	-0.00678233	remind - SSP1-NDC - 2050	RoW	kilogram		technosphere	inert waste, for final disposal
market for natural gas, high pressure	0.00564357	remind - SSP1-NDC - 2050	RoW	cubic meter		technosphere	natural gas, high pressure
market for nitrogen, liquid	0.00359723	remind - SSP1-NDC - 2050	RoW	kilogram		technosphere	nitrogen, liquid
market for oxygen, liquid	0.036	remind - SSP1-NDC - 2050	World	kilogram		technosphere	oxygen, liquid
market for quicklime, in pieces, loose	0.0591608	remind - SSP1-NDC - 2050	RoW	kilogram		technosphere	quicklime, in pieces, loose
market for refractory, basic, packed	0.0154919	remind - SSP1-NDC - 2050	GLO	kilogram		technosphere	refractory, basic, packed
market group for electricity, medium voltage	0.0335191	remind - SSP1-NDC - 2050	RLA	kilowatt hour		technosphere	electricity, medium voltage
market group for electricity, medium voltage	0.107422	remind - SSP1-NDC - 2050	RNA	kilowatt hour		technosphere	electricity, medium voltage
market group for electricity, medium voltage	0.016822	remind - SSP1-NDC - 2050	RAF	kilowatt hour		technosphere	electricity, medium voltage
market group for electricity, medium voltage	0.30754	remind - SSP1-NDC - 2050	RAS	kilowatt hour		technosphere	electricity, medium voltage
preperation for recycling, steel scrap, from fossil infrastructure, 2050	0.55079	steel_prod_SSP1-NDC	GLO	kilogram		technosphere	steel scrap, from fossil infrastructure
treatment of electric arc furnace dust, residual material landfill, pessimistic, 2050	-0.0191274	steel_prod_SSP1-NDC	RoW	kilogram		technosphere	electric arc furnace dust
treatment of electric arc furnace slag, chromium steel, residual material landfill, pessimistic, 2050	-0.165106	steel_prod_SSP1-NDC	GLO	kilogram		technosphere	electric arc furnace slag
Activity	steel production, electric, low-alloyed, optimistic, 2025
code	e8c5fac3388d4a08a96bb0f21e63f60c
comment	This dataset has been modified by `premise`, according to the performance for steel production indicated by the IAM model REMIND for the IAM region World in 2100, following the scenario SSP1-NDC. The energy efficiency of the process has been improved by 10%.This activity represents the production of secondary low-alloyed steel in an electric arc furnace (EAF). The process comprises the following …
location	World
reference product	steel, low-alloyed
scenario	SSP1-NDC
type	process
unit	kilogram
worksheet name	steel_prod_SSP1-NDC
year	2025
Exchanges
name	amount	database	location	unit	categories	type	reference product
Antimony ion	4.20301e-10			kilogram	air	biosphere
Argon-40	1.55606e-05			kilogram	air	biosphere
Arsenic ion	4.75423e-10			kilogram	air	biosphere
Benzene	8.48637e-07			kilogram	air	biosphere
Benzene, hexachloro-	6.42293e-09			kilogram	air	biosphere
Cadmium II	1.91118e-08			kilogram	air	biosphere
Cadmium II	1.21518e-09			kilogram	air::urban air close to ground	biosphere
Cadmium II	1.62024e-11			kilogram	water	biosphere
Carbon dioxide, fossil	0.0448951			kilogram	air	biosphere
Carbon dioxide, fossil	0.00494661			kilogram	air::urban air close to ground	biosphere
Carbon dioxide, non-fossil	9.82157e-05			kilogram	air	biosphere
Carbon monoxide, fossil	0.000926546			kilogram	air	biosphere
Carbon monoxide, fossil	4.1135e-05			kilogram	air::urban air close to ground	biosphere
Chloride	7.17664e-05			kilogram	water	biosphere
Chromium III	2.97044e-09			kilogram	air::urban air close to ground	biosphere
Chromium III	4.7308e-07			kilogram	air	biosphere
Chromium VI	7.55436e-08			kilogram	water	biosphere
Chromium VI	2.48047e-10			kilogram	air	biosphere
Cobalt II	2.80201e-10			kilogram	air	biosphere
Copper ion	4.18562e-09			kilogram	air::urban air close to ground	biosphere
Copper ion	7.96923e-09			kilogram	water	biosphere
Copper ion	1.10953e-07			kilogram	air	biosphere
Dioxins, measured as 2,3,7,8-tetrachlorodibenzo-p-dioxin	1.56301e-12			kilogram	air	biosphere
Dioxins, measured as 2,3,7,8-tetrachlorodibenzo-p-dioxin	5.4008e-15			kilogram	air::urban air close to ground	biosphere
Hydrocarbons, aromatic	6.88555e-05			kilogram	air	biosphere
Hydrochloric acid	4.71748e-06			kilogram	air	biosphere
Hydrochloric acid	5.71134e-08			kilogram	air::urban air close to ground	biosphere
Hydrogen fluoride	6.6877e-07			kilogram	air	biosphere
Lead II	1.62024e-09			kilogram	water	biosphere
Lead II	7.97328e-07			kilogram	air	biosphere
Lead II	4.92823e-08			kilogram	air::urban air close to ground	biosphere
Manganese II	7.00502e-10			kilogram	air	biosphere
Mercury II	7.96618e-09			kilogram	air::urban air close to ground	biosphere
Mercury II	6.24269e-07			kilogram	air	biosphere
Mercury II	3.24048e-11			kilogram	water	biosphere
Methane, fossil	2.03852e-06			kilogram	air::urban air close to ground	biosphere
NMVOC, non-methane volatile organic compounds	2.03853e-06			kilogram	air::urban air close to ground	biosphere
Nickel II	2.43483e-07			kilogram	air	biosphere
Nickel II	2.7004e-10			kilogram	air::urban air close to ground	biosphere
Nickel II	3.30869e-10			kilogram	water	biosphere
Nitrogen oxides	7.31565e-06			kilogram	air::urban air close to ground	biosphere
Nitrogen oxides	0.000101937			kilogram	air	biosphere
PAH, polycyclic aromatic hydrocarbons	6.79146e-08			kilogram	air	biosphere
PAH, polycyclic aromatic hydrocarbons	1.14767e-08			kilogram	air::urban air close to ground	biosphere
Particulate Matter, < 2.5 um	5.62815e-05			kilogram	air	biosphere
Particulate Matter, < 2.5 um	7.12244e-07			kilogram	air::urban air close to ground	biosphere
Particulate Matter, > 10 um	2.5138e-07			kilogram	air::urban air close to ground	biosphere
Particulate Matter, > 10 um	1.9494e-05			kilogram	air	biosphere
Particulate Matter, > 2.5 um and < 10um	5.6355e-05			kilogram	air	biosphere
Particulate Matter, > 2.5 um and < 10um	7.12244e-07			kilogram	air::urban air close to ground	biosphere
Phosphorus	1.97059e-11			kilogram	water	biosphere
Polychlorinated biphenyls	6.49506e-09			kilogram	air	biosphere
Polychlorinated biphenyls	7.4261e-11			kilogram	air::urban air close to ground	biosphere
Selenium IV	2.80201e-10			kilogram	air	biosphere
Sulfate	5.12171e-08			kilogram	water	biosphere
Sulfur dioxide	1.90243e-07			kilogram	air::urban air close to ground	biosphere
Sulfur dioxide	5.20581e-05			kilogram	air	biosphere
Tellurium	5.62699e-10			kilogram	air	biosphere
Tin ion	7.00502e-10			kilogram	air	biosphere
Titanium ion	2.80201e-10			kilogram	air	biosphere
Vanadium V	7.00502e-10			kilogram	air	biosphere
Water	0.00147176			cubic meter	water	biosphere
Water	7.22231e-05			cubic meter	air::urban air close to ground	biosphere
Water	0.00887165			cubic meter	air	biosphere
Water, cooling, unspecified natural origin	0.00417675			cubic meter	natural resource::in water	biosphere
Water, unspecified natural origin	0.0352786			cubic meter	natural resource::in ground	biosphere
Zinc II	7.24922e-07			kilogram	air::urban air close to ground	biosphere
Zinc II	7.84638e-06			kilogram	air	biosphere
Zinc II	2.66075e-08			kilogram	water	biosphere
steel production, electric, low-alloyed, optimistic, 2025	1	steel_prod_SSP1-NDC	World	kilogram		production	steel, low-alloyed
carbon dioxide, captured at steel production plant, with underground storage, post, 200 km	5.12428e-05	remind - SSP1-NDC - 2025	World	kilogram		technosphere	carbon dioxide, captured and stored
electric arc furnace slag, for recovery, Recycled Content cut-off	-0.00399409	remind - SSP1-NDC - 2025	GLO	kilogram		technosphere	electric arc furnace slag, for recovery
market for aluminium, cast alloy	0.000108691	remind - SSP1-NDC - 2025	GLO	kilogram		technosphere	aluminium, cast alloy
market for aluminium, primary, ingot	4.36378e-07	remind - SSP1-NDC - 2025	RoW	kilogram		technosphere	aluminium, primary, ingot
market for aluminium, wrought alloy	0.000108068	remind - SSP1-NDC - 2025	GLO	kilogram		technosphere	aluminium, wrought alloy
market for anode, for metal electrolysis	0.00234417	remind - SSP1-NDC - 2025	GLO	kilogram		technosphere	anode, for metal electrolysis
market for argon, liquid	0.000690895	remind - SSP1-NDC - 2025	RoW	kilogram		technosphere	argon, liquid
market for calcium carbide, technical grade	3.16949e-06	remind - SSP1-NDC - 2025	RoW	kilogram		technosphere	calcium carbide, technical grade
market for cast iron	0	remind - SSP1-NDC - 2025	GLO	kilogram		technosphere	cast iron
market for chemical, inorganic	1.82263e-06	remind - SSP1-NDC - 2025	GLO	kilogram		technosphere	chemical, inorganic
market for coke	0.00299928	remind - SSP1-NDC - 2025	GLO	megajoule		technosphere	coke
market for diesel, burned in building machine	1.45954e-05	remind - SSP1-NDC - 2025	World	megajoule		technosphere	diesel, burned in building machine
market for dolomite	0.0120311	remind - SSP1-NDC - 2025	RoW	kilogram		technosphere	dolomite
market for electric arc furnace converter	4.02495e-11	remind - SSP1-NDC - 2025	GLO	unit		technosphere	electric arc furnace converter
market for electric arc furnace dust	0	remind - SSP1-NDC - 2025	RoW	kilogram		technosphere	electric arc furnace dust
market for electric arc furnace secondary metallurgy slag	0	remind - SSP1-NDC - 2025	RoW	kilogram		technosphere	electric arc furnace secondary metallurgy slag
market for electric arc furnace slag	0	remind - SSP1-NDC - 2025	RoW	kilogram		technosphere	electric arc furnace slag
market for electricity, high voltage	6.61888e-06	remind - SSP1-NDC - 2025	KP	kilowatt hour		technosphere	electricity, high voltage
market for electricity, high voltage	0.000424841	remind - SSP1-NDC - 2025	JP	kilowatt hour		technosphere	electricity, high voltage
market for electricity, high voltage	1.82291e-05	remind - SSP1-NDC - 2025	OM	kilowatt hour		technosphere	electricity, high voltage
market for electricity, high voltage	0.000110475	remind - SSP1-NDC - 2025	AU	kilowatt hour		technosphere	electricity, high voltage
market for electricity, high voltage	5.02792e-05	remind - SSP1-NDC - 2025	KZ	kilowatt hour		technosphere	electricity, high voltage
market for electricity, high voltage	2.16266e-05	remind - SSP1-NDC - 2025	NZ	kilowatt hour		technosphere	electricity, high voltage
market for electricity, high voltage	2.44347e-05	remind - SSP1-NDC - 2025	HK	kilowatt hour		technosphere	electricity, high voltage
market for electricity, high voltage	7.3833e-06	remind - SSP1-NDC - 2025	KG	kilowatt hour		technosphere	electricity, high voltage
market for electricity, high voltage	9.04311e-06	remind - SSP1-NDC - 2025	BH	kilowatt hour		technosphere	electricity, high voltage
market for electricity, high voltage	2.43196e-06	remind - SSP1-NDC - 2025	CY	kilowatt hour		technosphere	electricity, high voltage
market for electricity, high voltage	8.0949e-05	remind - SSP1-NDC - 2025	MY	kilowatt hour		technosphere	electricity, high voltage
market for electricity, high voltage	3.79222e-06	remind - SSP1-NDC - 2025	NP	kilowatt hour		technosphere	electricity, high voltage
market for electricity, high voltage	9.05628e-05	remind - SSP1-NDC - 2025	ID	kilowatt hour		technosphere	electricity, high voltage
market for electricity, high voltage	1.07788e-05	remind - SSP1-NDC - 2025	AZ	kilowatt hour		technosphere	electricity, high voltage
market for electricity, high voltage	1.90844e-06	remind - SSP1-NDC - 2025	BN	kilowatt hour		technosphere	electricity, high voltage
market for electricity, high voltage	0.000110159	remind - SSP1-NDC - 2025	VN	kilowatt hour		technosphere	electricity, high voltage
market for electricity, high voltage	5.69563e-05	remind - SSP1-NDC - 2025	TH	kilowatt hour		technosphere	electricity, high voltage
market for electricity, high voltage	5.00234e-05	remind - SSP1-NDC - 2025	PH	kilowatt hour		technosphere	electricity, high voltage
market for electricity, high voltage	9.33293e-07	remind - SSP1-NDC - 2025	QA	kilowatt hour		technosphere	electricity, high voltage
market for electricity, high voltage	5.76175e-06	remind - SSP1-NDC - 2025	KH	kilowatt hour		technosphere	electricity, high voltage
market for electricity, high voltage	8.79637e-06	remind - SSP1-NDC - 2025	TJ	kilowatt hour		technosphere	electricity, high voltage
market for electricity, high voltage	6.34591e-05	remind - SSP1-NDC - 2025	PK	kilowatt hour		technosphere	electricity, high voltage
market for electricity, high voltage	2.94977e-05	remind - SSP1-NDC - 2025	IL	kilowatt hour		technosphere	electricity, high voltage
market for electricity, high voltage	8.87866e-06	remind - SSP1-NDC - 2025	TM	kilowatt hour		technosphere	electricity, high voltage
market for electricity, high voltage	1.10937e-05	remind - SSP1-NDC - 2025	MM	kilowatt hour		technosphere	electricity, high voltage
market for electricity, high voltage	2.25724e-05	remind - SSP1-NDC - 2025	SG	kilowatt hour		technosphere	electricity, high voltage
market for electricity, high voltage	0.000268667	remind - SSP1-NDC - 2025	KR	kilowatt hour		technosphere	electricity, high voltage
market for electricity, high voltage	0.000113525	remind - SSP1-NDC - 2025	TW	kilowatt hour		technosphere	electricity, high voltage
market for electricity, high voltage	5.7991e-06	remind - SSP1-NDC - 2025	GE	kilowatt hour		technosphere	electricity, high voltage
market for electricity, high voltage	7.0533e-06	remind - SSP1-NDC - 2025	LB	kilowatt hour		technosphere	electricity, high voltage
market for electricity, high voltage	3.54302e-05	remind - SSP1-NDC - 2025	BD	kilowatt hour		technosphere	electricity, high voltage
market for electricity, high voltage	1.26831e-06	remind - SSP1-NDC - 2025	YE	kilowatt hour		technosphere	electricity, high voltage
market for electricity, high voltage	7.379e-06	remind - SSP1-NDC - 2025	LK	kilowatt hour		technosphere	electricity, high voltage
market for electricity, high voltage	7.5553e-06	remind - SSP1-NDC - 2025	SY	kilowatt hour		technosphere	electricity, high voltage
market for electricity, high voltage	3.23549e-06	remind - SSP1-NDC - 2025	AM	kilowatt hour		technosphere	electricity, high voltage
market for electricity, high voltage	3.12637e-05	remind - SSP1-NDC - 2025	UZ	kilowatt hour		technosphere	electricity, high voltage
market for electricity, high voltage	8.37025e-06	remind - SSP1-NDC - 2025	JO	kilowatt hour		technosphere	electricity, high voltage
market for electricity, high voltage	0.000132584	remind - SSP1-NDC - 2025	TR	kilowatt hour		technosphere	electricity, high voltage
market for electricity, high voltage	4.11828e-06	remind - SSP1-NDC - 2025	MN	kilowatt hour		technosphere	electricity, high voltage
market for electricity, low voltage	1.39576e-07	remind - SSP1-NDC - 2025	JO	kilowatt hour		technosphere	electricity, low voltage
market for electricity, low voltage	2.84426e-08	remind - SSP1-NDC - 2025	BN	kilowatt hour		technosphere	electricity, low voltage
market for electricity, low voltage	7.60414e-07	remind - SSP1-NDC - 2025	KZ	kilowatt hour		technosphere	electricity, low voltage
market for electricity, low voltage	1.71947e-06	remind - SSP1-NDC - 2025	VN	kilowatt hour		technosphere	electricity, low voltage
market for electricity, low voltage	1.43392e-08	remind - SSP1-NDC - 2025	QA	kilowatt hour		technosphere	electricity, low voltage
market for electricity, low voltage	7.22893e-06	remind - SSP1-NDC - 2025	JP	kilowatt hour		technosphere	electricity, low voltage
market for electricity, low voltage	4.83556e-07	remind - SSP1-NDC - 2025	IL	kilowatt hour		technosphere	electricity, low voltage
market for electricity, low voltage	3.80695e-07	remind - SSP1-NDC - 2025	HK	kilowatt hour		technosphere	electricity, low voltage
market for electricity, low voltage	1.23967e-06	remind - SSP1-NDC - 2025	MY	kilowatt hour		technosphere	electricity, low voltage
market for electricity, low voltage	1.36575e-06	remind - SSP1-NDC - 2025	ID	kilowatt hour		technosphere	electricity, low voltage
market for electricity, low voltage	1.27433e-07	remind - SSP1-NDC - 2025	TM	kilowatt hour		technosphere	electricity, low voltage
market for electricity, low voltage	1.8201e-06	remind - SSP1-NDC - 2025	AU	kilowatt hour		technosphere	electricity, low voltage
market for electricity, low voltage	3.9565e-08	remind - SSP1-NDC - 2025	CY	kilowatt hour		technosphere	electricity, low voltage
market for electricity, low voltage	8.65851e-08	remind - SSP1-NDC - 2025	KH	kilowatt hour		technosphere	electricity, low voltage
market for electricity, low voltage	1.27648e-07	remind - SSP1-NDC - 2025	TJ	kilowatt hour		technosphere	electricity, low voltage
market for electricity, low voltage	1.04761e-07	remind - SSP1-NDC - 2025	KG	kilowatt hour		technosphere	electricity, low voltage
market for electricity, low voltage	1.12142e-07	remind - SSP1-NDC - 2025	LK	kilowatt hour		technosphere	electricity, low voltage
market for electricity, low voltage	7.5824e-07	remind - SSP1-NDC - 2025	PH	kilowatt hour		technosphere	electricity, low voltage
market for electricity, low voltage	4.74961e-07	remind - SSP1-NDC - 2025	UZ	kilowatt hour		technosphere	electricity, low voltage
market for electricity, low voltage	9.46409e-08	remind - SSP1-NDC - 2025	KP	kilowatt hour		technosphere	electricity, low voltage
market for electricity, low voltage	1.62031e-07	remind - SSP1-NDC - 2025	AZ	kilowatt hour		technosphere	electricity, low voltage
market for electricity, low voltage	1.80206e-06	remind - SSP1-NDC - 2025	TW	kilowatt hour		technosphere	electricity, low voltage
market for electricity, low voltage	3.30993e-07	remind - SSP1-NDC - 2025	NZ	kilowatt hour		technosphere	electricity, low voltage
market for electricity, low voltage	9.05372e-07	remind - SSP1-NDC - 2025	TH	kilowatt hour		technosphere	electricity, low voltage
market for electricity, low voltage	3.69396e-07	remind - SSP1-NDC - 2025	SG	kilowatt hour		technosphere	electricity, low voltage
market for electricity, low voltage	1.60142e-07	remind - SSP1-NDC - 2025	MM	kilowatt hour		technosphere	electricity, low voltage
market for electricity, low voltage	2.07366e-08	remind - SSP1-NDC - 2025	YE	kilowatt hour		technosphere	electricity, low voltage
market for electricity, low voltage	4.92927e-08	remind - SSP1-NDC - 2025	AM	kilowatt hour		technosphere	electricity, low voltage
market for electricity, low voltage	8.76447e-08	remind - SSP1-NDC - 2025	GE	kilowatt hour		technosphere	electricity, low voltage
market for electricity, low voltage	1.05637e-07	remind - SSP1-NDC - 2025	LB	kilowatt hour		technosphere	electricity, low voltage
market for electricity, low voltage	5.30202e-07	remind - SSP1-NDC - 2025	BD	kilowatt hour		technosphere	electricity, low voltage
market for electricity, low voltage	4.29148e-06	remind - SSP1-NDC - 2025	KR	kilowatt hour		technosphere	electricity, low voltage
market for electricity, low voltage	9.30483e-07	remind - SSP1-NDC - 2025	PK	kilowatt hour		technosphere	electricity, low voltage
market for electricity, low voltage	1.03089e-07	remind - SSP1-NDC - 2025	SY	kilowatt hour		technosphere	electricity, low voltage
market for electricity, low voltage	2.04125e-06	remind - SSP1-NDC - 2025	TR	kilowatt hour		technosphere	electricity, low voltage
market for electricity, low voltage	1.42331e-07	remind - SSP1-NDC - 2025	BH	kilowatt hour		technosphere	electricity, low voltage
market for electricity, low voltage	6.18933e-08	remind - SSP1-NDC - 2025	MN	kilowatt hour		technosphere	electricity, low voltage
market for electricity, low voltage	2.72326e-07	remind - SSP1-NDC - 2025	OM	kilowatt hour		technosphere	electricity, low voltage
market for electricity, low voltage	5.44763e-08	remind - SSP1-NDC - 2025	NP	kilowatt hour		technosphere	electricity, low voltage
market for electricity, medium voltage	0.00506043	remind - SSP1-NDC - 2025	VN	kilowatt hour		technosphere	electricity, medium voltage
market for electricity, medium voltage	0.000111979	remind - SSP1-NDC - 2025	CY	kilowatt hour		technosphere	electricity, medium voltage
market for electricity, medium voltage	0.00143643	remind - SSP1-NDC - 2025	UZ	kilowatt hour		technosphere	electricity, medium voltage
market for electricity, medium voltage	0.000401012	remind - SSP1-NDC - 2025	TJ	kilowatt hour		technosphere	electricity, medium voltage
market for electricity, medium voltage	0.00415506	remind - SSP1-NDC - 2025	ID	kilowatt hour		technosphere	electricity, medium voltage
market for electricity, medium voltage	0.000335343	remind - SSP1-NDC - 2025	KG	kilowatt hour		technosphere	electricity, medium voltage
market for electricity, medium voltage	0.00261121	remind - SSP1-NDC - 2025	TH	kilowatt hour		technosphere	electricity, medium voltage
market for electricity, medium voltage	0.00229146	remind - SSP1-NDC - 2025	PH	kilowatt hour		technosphere	electricity, medium voltage
market for electricity, medium voltage	4.2965e-05	remind - SSP1-NDC - 2025	QA	kilowatt hour		technosphere	electricity, medium voltage
market for electricity, medium voltage	0.000263745	remind - SSP1-NDC - 2025	KH	kilowatt hour		technosphere	electricity, medium voltage
market for electricity, medium voltage	0.00107089	remind - SSP1-NDC - 2025	SG	kilowatt hour		technosphere	electricity, medium voltage
market for electricity, medium voltage	0.0123868	remind - SSP1-NDC - 2025	KR	kilowatt hour		technosphere	electricity, medium voltage
market for electricity, medium voltage	0.00523735	remind - SSP1-NDC - 2025	TW	kilowatt hour		technosphere	electricity, medium voltage
market for electricity, medium voltage	0.000994268	remind - SSP1-NDC - 2025	NZ	kilowatt hour		technosphere	electricity, medium voltage
market for electricity, medium voltage	0.000266204	remind - SSP1-NDC - 2025	GE	kilowatt hour		technosphere	electricity, medium voltage
market for electricity, medium voltage	0.00032281	remind - SSP1-NDC - 2025	LB	kilowatt hour		technosphere	electricity, medium voltage
market for electricity, medium voltage	0.00135678	remind - SSP1-NDC - 2025	IL	kilowatt hour		technosphere	electricity, medium voltage
market for electricity, medium voltage	0.000404024	remind - SSP1-NDC - 2025	TM	kilowatt hour		technosphere	electricity, medium voltage
market for electricity, medium voltage	0.00050509	remind - SSP1-NDC - 2025	MM	kilowatt hour		technosphere	electricity, medium voltage
market for electricity, medium voltage	5.6529e-05	remind - SSP1-NDC - 2025	YE	kilowatt hour		technosphere	electricity, medium voltage
market for electricity, medium voltage	0.00289465	remind - SSP1-NDC - 2025	PK	kilowatt hour		technosphere	electricity, medium voltage
market for electricity, medium voltage	0.000148414	remind - SSP1-NDC - 2025	AM	kilowatt hour		technosphere	electricity, medium voltage
market for electricity, medium voltage	0.000494107	remind - SSP1-NDC - 2025	AZ	kilowatt hour		technosphere	electricity, medium voltage
market for electricity, medium voltage	0.00605781	remind - SSP1-NDC - 2025	TR	kilowatt hour		technosphere	electricity, medium voltage
market for electricity, medium voltage	0.00162171	remind - SSP1-NDC - 2025	BD	kilowatt hour		technosphere	electricity, medium voltage
market for electricity, medium voltage	0.000340996	remind - SSP1-NDC - 2025	SY	kilowatt hour		technosphere	electricity, medium voltage
market for electricity, medium voltage	0.000418088	remind - SSP1-NDC - 2025	BH	kilowatt hour		technosphere	electricity, medium voltage
market for electricity, medium voltage	0.000338521	remind - SSP1-NDC - 2025	LK	kilowatt hour		technosphere	electricity, medium voltage
market for electricity, medium voltage	0.000380261	remind - SSP1-NDC - 2025	JO	kilowatt hour		technosphere	electricity, medium voltage
market for electricity, medium voltage	0.0198282	remind - SSP1-NDC - 2025	JP	kilowatt hour		technosphere	electricity, medium voltage
market for electricity, medium voltage	0.000300921	remind - SSP1-NDC - 2025	KP	kilowatt hour		technosphere	electricity, medium voltage
market for electricity, medium voltage	8.73875e-05	remind - SSP1-NDC - 2025	BN	kilowatt hour		technosphere	electricity, medium voltage
market for electricity, medium voltage	0.000188444	remind - SSP1-NDC - 2025	MN	kilowatt hour		technosphere	electricity, medium voltage
market for electricity, medium voltage	0.000835108	remind - SSP1-NDC - 2025	OM	kilowatt hour		technosphere	electricity, medium voltage
market for electricity, medium voltage	0.00230399	remind - SSP1-NDC - 2025	KZ	kilowatt hour		technosphere	electricity, medium voltage
market for electricity, medium voltage	0.00112761	remind - SSP1-NDC - 2025	HK	kilowatt hour		technosphere	electricity, medium voltage
market for electricity, medium voltage	0.000172587	remind - SSP1-NDC - 2025	NP	kilowatt hour		technosphere	electricity, medium voltage
market for electricity, medium voltage	0.00507316	remind - SSP1-NDC - 2025	AU	kilowatt hour		technosphere	electricity, medium voltage
market for electricity, medium voltage	0.00371954	remind - SSP1-NDC - 2025	MY	kilowatt hour		technosphere	electricity, medium voltage
market for electrode, negative, Ni	0.000367128	remind - SSP1-NDC - 2025	GLO	kilogram		technosphere	electrode, negative, Ni
market for ethylene glycol	2.22266e-08	remind - SSP1-NDC - 2025	GLO	kilogram		technosphere	ethylene glycol
market for ferrochromium, high-carbon, 68% Cr	0	remind - SSP1-NDC - 2025	GLO	kilogram		technosphere	ferrochromium, high-carbon, 68% Cr
market for ferromanganese, high-coal, 74.5% Mn	0	remind - SSP1-NDC - 2025	GLO	kilogram		technosphere	ferromanganese, high-coal, 74.5% Mn
market for ferrosilicon	0	remind - SSP1-NDC - 2025	GLO	kilogram		technosphere	ferrosilicon
market for fluorspar, 97% purity	1.5411e-05	remind - SSP1-NDC - 2025	GLO	kilogram		technosphere	fluorspar, 97% purity
market for hard coal	0.00649921	remind - SSP1-NDC - 2025	RoW	kilogram		technosphere	hard coal
market for heat, district or industrial, natural gas	0.01032	remind - SSP1-NDC - 2025	RoW	megajoule		technosphere	heat, district or industrial, natural gas
market for heat, district or industrial, other than natural gas	0.0029099	remind - SSP1-NDC - 2025	RoW	megajoule		technosphere	heat, district or industrial, other than natural gas
market for heavy fuel oil	0.000113397	remind - SSP1-NDC - 2025	RoW	kilogram		technosphere	heavy fuel oil
market for hot rolling, steel	1	remind - SSP1-NDC - 2025	GLO	kilogram		technosphere	hot rolling, steel
market for hydrochloric acid, without water, in 30% solution state	1.23711e-05	remind - SSP1-NDC - 2025	RoW	kilogram		technosphere	hydrochloric acid, without water, in 30% solution state
market for inert waste	-0.000696008	remind - SSP1-NDC - 2025	RoW	kilogram		technosphere	inert waste
market for inert waste, for final disposal	-0.00734125	remind - SSP1-NDC - 2025	RoW	kilogram		technosphere	inert waste, for final disposal
market for iron scrap, sorted, pressed	0	remind - SSP1-NDC - 2025	RoW	kilogram		technosphere	iron scrap, sorted, pressed
market for iron scrap, unsorted	0	remind - SSP1-NDC - 2025	GLO	kilogram		technosphere	iron scrap, unsorted
market for lime	0.0132342	remind - SSP1-NDC - 2025	RoW	kilogram		technosphere	lime
market for liquefied petroleum gas	0.000193516	remind - SSP1-NDC - 2025	RoW	kilogram		technosphere	liquefied petroleum gas
market for lubricating oil	0.0190226	remind - SSP1-NDC - 2025	RoW	kilogram		technosphere	lubricating oil
market for molybdenum trioxide	0	remind - SSP1-NDC - 2025	GLO	kilogram		technosphere	molybdenum trioxide
market for natural gas, high pressure	0.00585	remind - SSP1-NDC - 2025	RoW	cubic meter		technosphere	natural gas, high pressure
market for nickel, class 1	0	remind - SSP1-NDC - 2025	GLO	kilogram		technosphere	nickel, class 1
market for nitrogen, liquid	0.0120712	remind - SSP1-NDC - 2025	RoW	kilogram		technosphere	nitrogen, liquid
market for oxygen, liquid	0.0359034	remind - SSP1-NDC - 2025	World	kilogram		technosphere	oxygen, liquid
market for pig iron	0	remind - SSP1-NDC - 2025	World	kilogram		technosphere	pig iron
market for propane, burned in building machine	1.29106e-05	remind - SSP1-NDC - 2025	GLO	megajoule		technosphere	propane, burned in building machine
market for quicklime, in pieces, loose	0.0413549	remind - SSP1-NDC - 2025	RoW	kilogram		technosphere	quicklime, in pieces, loose
market for refractory, basic, packed	0.0145136	remind - SSP1-NDC - 2025	GLO	kilogram		technosphere	refractory, basic, packed
market for silica sand	2.11069e-05	remind - SSP1-NDC - 2025	GLO	kilogram		technosphere	silica sand
market for spent solvent mixture	-2.22266e-08	remind - SSP1-NDC - 2025	RoW	kilogram		technosphere	spent solvent mixture
market for sponge iron	0	remind - SSP1-NDC - 2025	GLO	kilogram		technosphere	sponge iron
market for sulfur dioxide, liquid	8.61273e-06	remind - SSP1-NDC - 2025	RoW	kilogram		technosphere	sulfur dioxide, liquid
market for sulfuric acid	6.75775e-06	remind - SSP1-NDC - 2025	RoW	kilogram		technosphere	sulfuric acid
market for wastewater from pig iron production	-0.028223	remind - SSP1-NDC - 2025	RoW	cubic meter		technosphere	wastewater from pig iron production
market group for electricity, high voltage	0.000172079	remind - SSP1-NDC - 2025	Canada without Quebec	kilowatt hour		technosphere	electricity, high voltage
market group for electricity, high voltage	0.000368156	remind - SSP1-NDC - 2025	RAF	kilowatt hour		technosphere	electricity, high voltage
market group for electricity, high voltage	0.000735038	remind - SSP1-NDC - 2025	RLA	kilowatt hour		technosphere	electricity, high voltage
market group for electricity, high voltage	0.000414639	remind - SSP1-NDC - 2025	RME	kilowatt hour		technosphere	electricity, high voltage
market group for electricity, high voltage	0.00384713	remind - SSP1-NDC - 2025	CN	kilowatt hour		technosphere	electricity, high voltage
market group for electricity, high voltage	0.00205136	remind - SSP1-NDC - 2025	US	kilowatt hour		technosphere	electricity, high voltage
market group for electricity, low voltage	1.06217e-05	remind - SSP1-NDC - 2025	RLA	kilowatt hour		technosphere	electricity, low voltage
market group for electricity, low voltage	5.90837e-05	remind - SSP1-NDC - 2025	CN	kilowatt hour		technosphere	electricity, low voltage
market group for electricity, low voltage	6.1603e-06	remind - SSP1-NDC - 2025	RME	kilowatt hour		technosphere	electricity, low voltage
market group for electricity, low voltage	3.23357e-05	remind - SSP1-NDC - 2025	US	kilowatt hour		technosphere	electricity, low voltage
market group for electricity, low voltage	2.66109e-06	remind - SSP1-NDC - 2025	Canada without Quebec	kilowatt hour		technosphere	electricity, low voltage
market group for electricity, low voltage	5.35969e-06	remind - SSP1-NDC - 2025	RAF	kilowatt hour		technosphere	electricity, low voltage
market group for electricity, medium voltage	0.0189353	remind - SSP1-NDC - 2025	RME	kilowatt hour		technosphere	electricity, medium voltage
market group for electricity, medium voltage	0.0333871	remind - SSP1-NDC - 2025	RLA	kilowatt hour		technosphere	electricity, medium voltage
market group for electricity, medium voltage	0.0946714	remind - SSP1-NDC - 2025	US	kilowatt hour		technosphere	electricity, medium voltage
market group for electricity, medium voltage	0.177094	remind - SSP1-NDC - 2025	CN	kilowatt hour		technosphere	electricity, medium voltage
market group for electricity, medium voltage	0.0167558	remind - SSP1-NDC - 2025	RAF	kilowatt hour		technosphere	electricity, medium voltage
market group for electricity, medium voltage	0.00792313	remind - SSP1-NDC - 2025	Canada without Quebec	kilowatt hour		technosphere	electricity, medium voltage
preperation for recycling, steel scrap, from fossil infrastructure, 2025	1.18008	steel_prod_SSP1-NDC	GLO	kilogram		technosphere	steel scrap, from fossil infrastructure
treatment of electric arc furnace dust, residual material landfill, optimistic, 2025	-0.0280052	steel_prod_SSP1-NDC	RoW	kilogram		technosphere	electric arc furnace dust
treatment of electric arc furnace slag, low-alloyed steel, residual material landfill, optimistic, 2025	-0.105263	steel_prod_SSP1-NDC	GLO	kilogram		technosphere	electric arc furnace slag
Activity	steel production, electric, low-alloyed, optimistic, 2030
code	2a7fd336c86748938acd11ad91ec9149
comment	This dataset has been modified by `premise`, according to the performance for steel production indicated by the IAM model REMIND for the IAM region World in 2100, following the scenario SSP1-NDC. The energy efficiency of the process has been improved by 10%.This activity represents the production of secondary low-alloyed steel in an electric arc furnace (EAF). The process comprises the following …
location	World
reference product	steel, low-alloyed
[truncated: 11,568 more rows]
