# Supplementary material for: Digesting fossil infrastructure for cleaner energy transitions
Source: Research Square preprint supplement (doi:10.21203/rs.3.rs-6346491/v1), 2025-06-06
Supplement: Supplementary file 169 [file steel_intensities_renewable.xlsx]

## Sheet: Tabelle1
system	MW per unit	technology	sub-technology	steel per unit [kg/unit]	steel per capacity [kg/MW]
photovoltaic open ground installation, 570 kWp, single-Si, on open ground, steel, secondary	0.57	PV	photovoltaics, open ground	31351.8	55003.1
photovoltaic slanted-roof installation, 3kWp, single-Si, panel, mounted, on roof, steel, secondary	0.003	PV	photovoltaics, slanted-roof	89.3328	29777.6
wind turbine construction, 2MW, offshore, primary, optimistic	2	Wind	wind energy, offshore	189500	94750
wind turbine construction, 4.5MW, onshore, secondary, optimistic	4.5	Wind	wind energy, onshore	683882	151974
