# Supplementary figures and images for: Digesting fossil infrastructure for cleaner energy transitions
Source: Research Square preprint supplement (doi:10.21203/rs.3.rs-6346491/v1), 2025-06-06

## Mineral resources

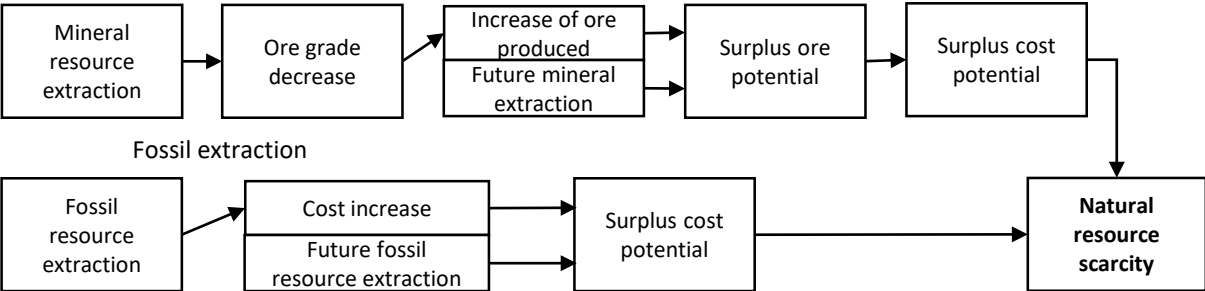

Supplement: Supplementary file 2 [file SM_fig_10_cause-and-effect-chains-natural-resources.pdf › code/Figures/SM_figures/SM_fig_10_cause-and-effect-chains-natural-resources.pdf]

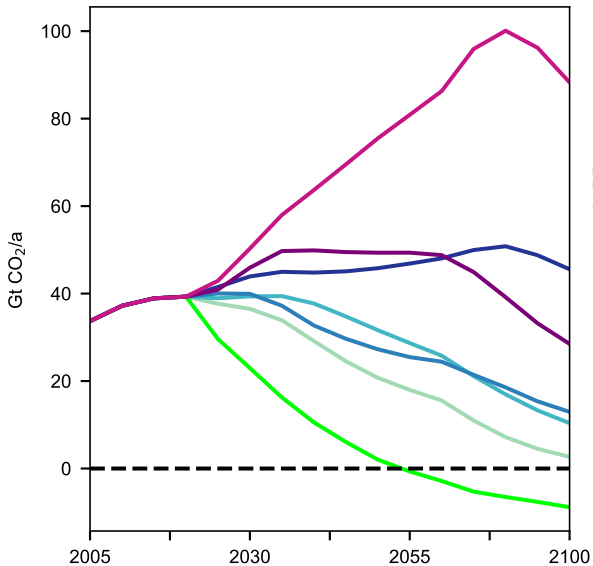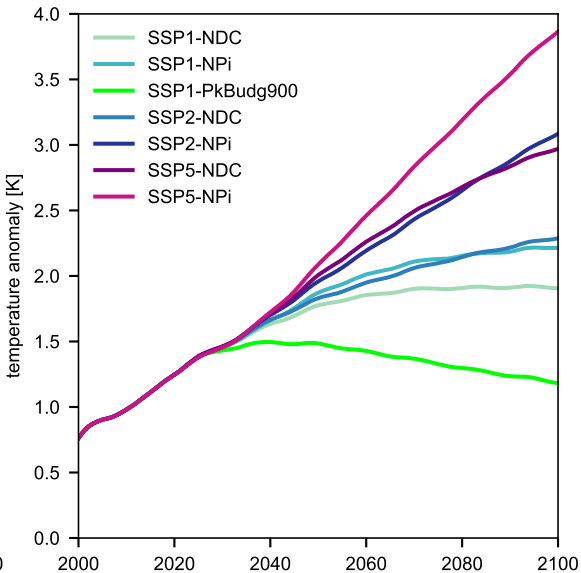

Supplement: Supplementary file 3 [file SM_fig_1_pathways.pdf › code/Figures/SM_figures/SM_fig_1_pathways.pdf]

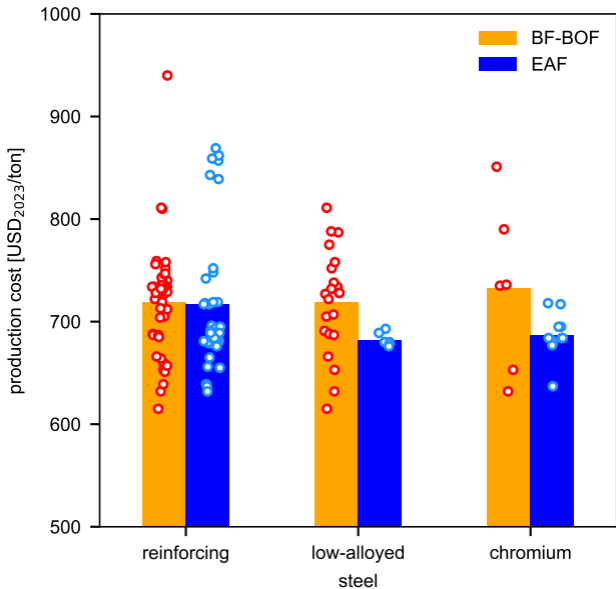

Supplement: Supplementary file 4 [file SM_fig_2_prodcost.pdf › code/Figures/SM_figures/SM_fig_2_prodcost.pdf]

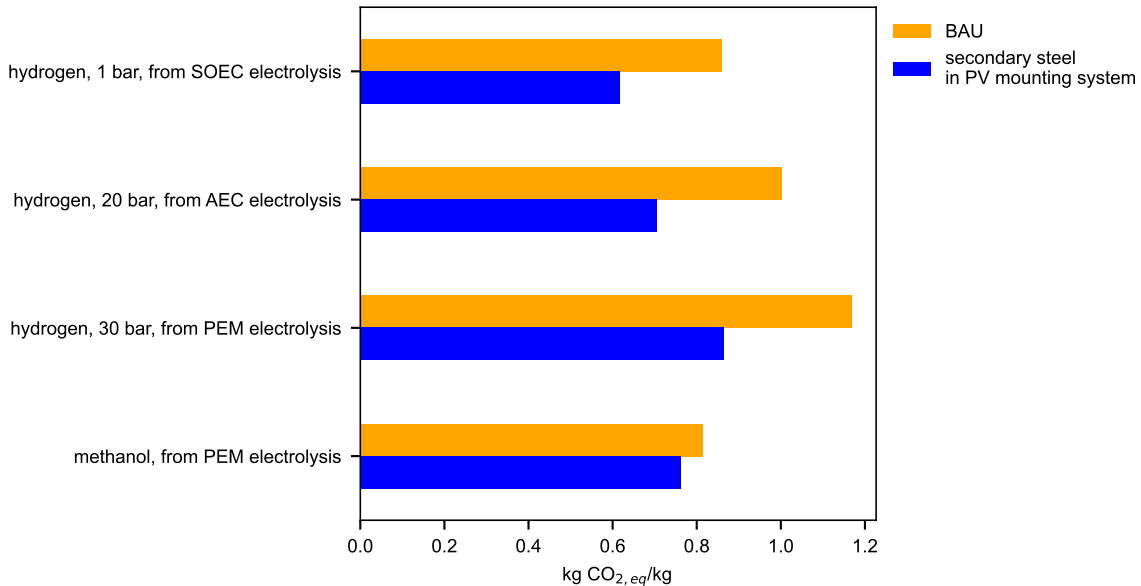

Supplement: Supplementary file 5 [file SM_fig_3_chemicals.pdf › code/Figures/SM_figures/SM_fig_3_chemicals.pdf]

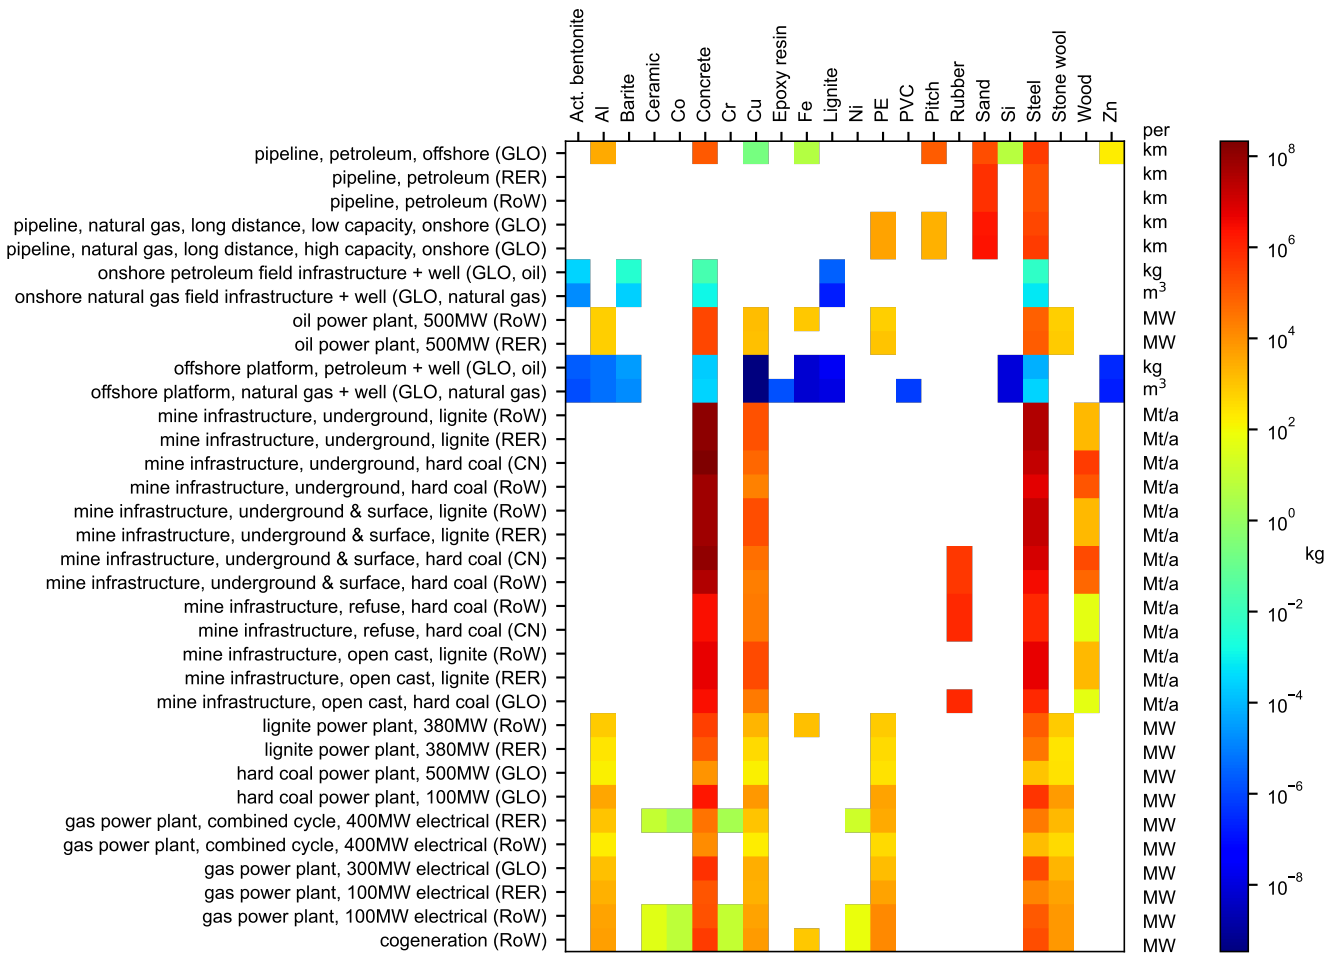

Supplement: Supplementary file 6 [file SM_fig_4_material_intensity.pdf › code/Figures/SM_figures/SM_fig_4_material_intensity.pdf]

## Electric arc furnace (EAF) route

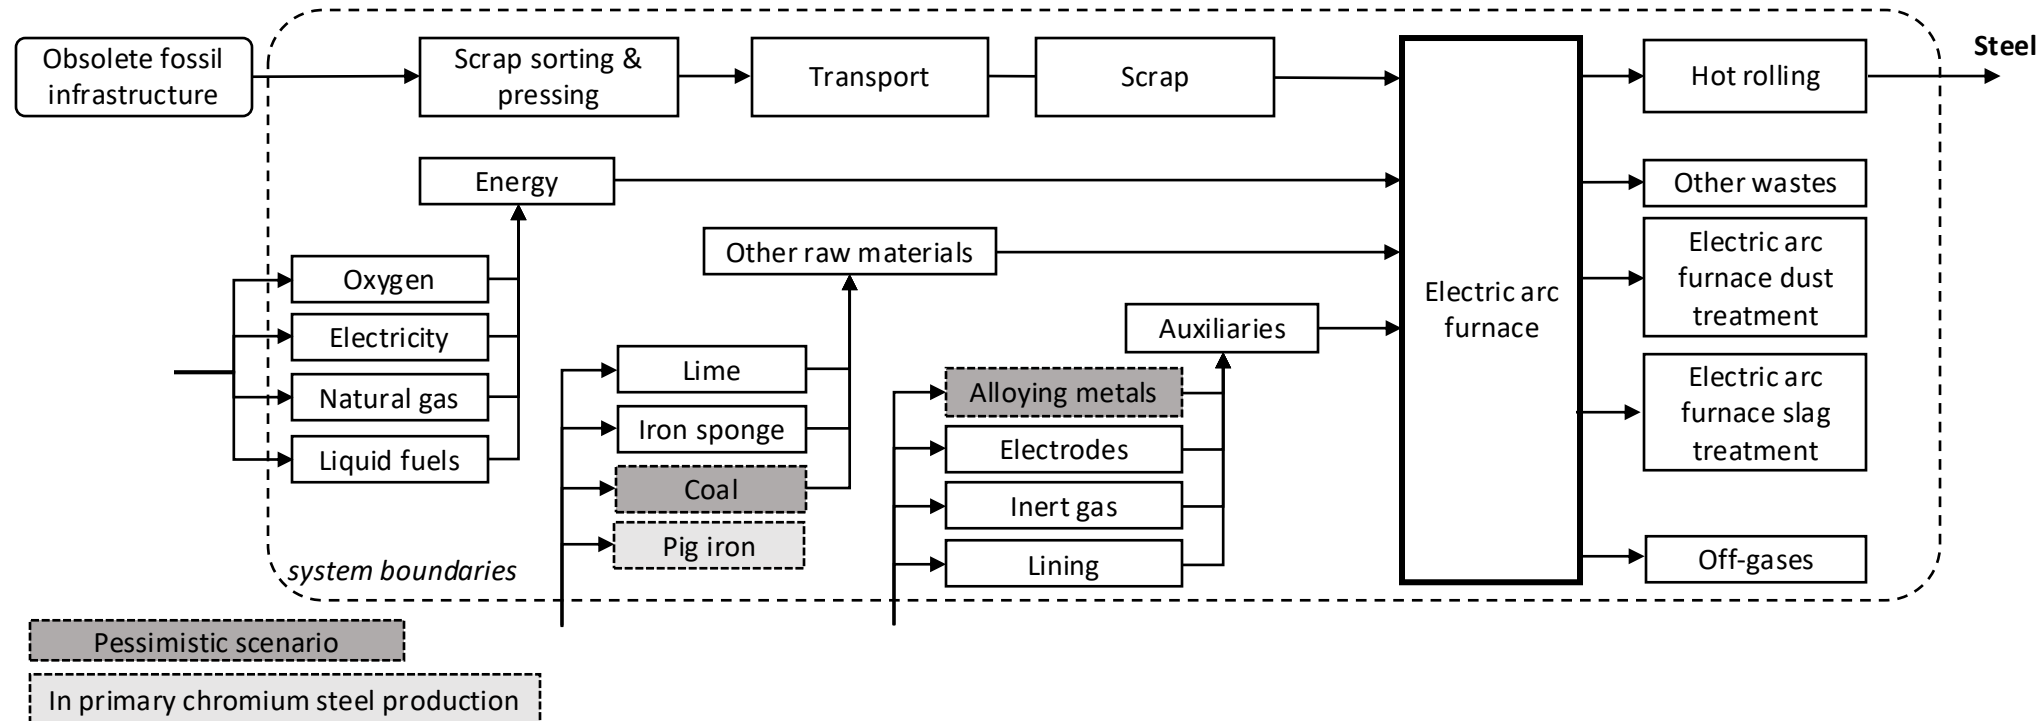

Supplement: Supplementary file 7 [file SM_fig_5_system-boundaries-EAF-route.pdf › code/Figures/SM_figures/SM_fig_5_system-boundaries-EAF-route.pdf]

**Blast furnace basic oxygen furnace (BF-BOF) route**

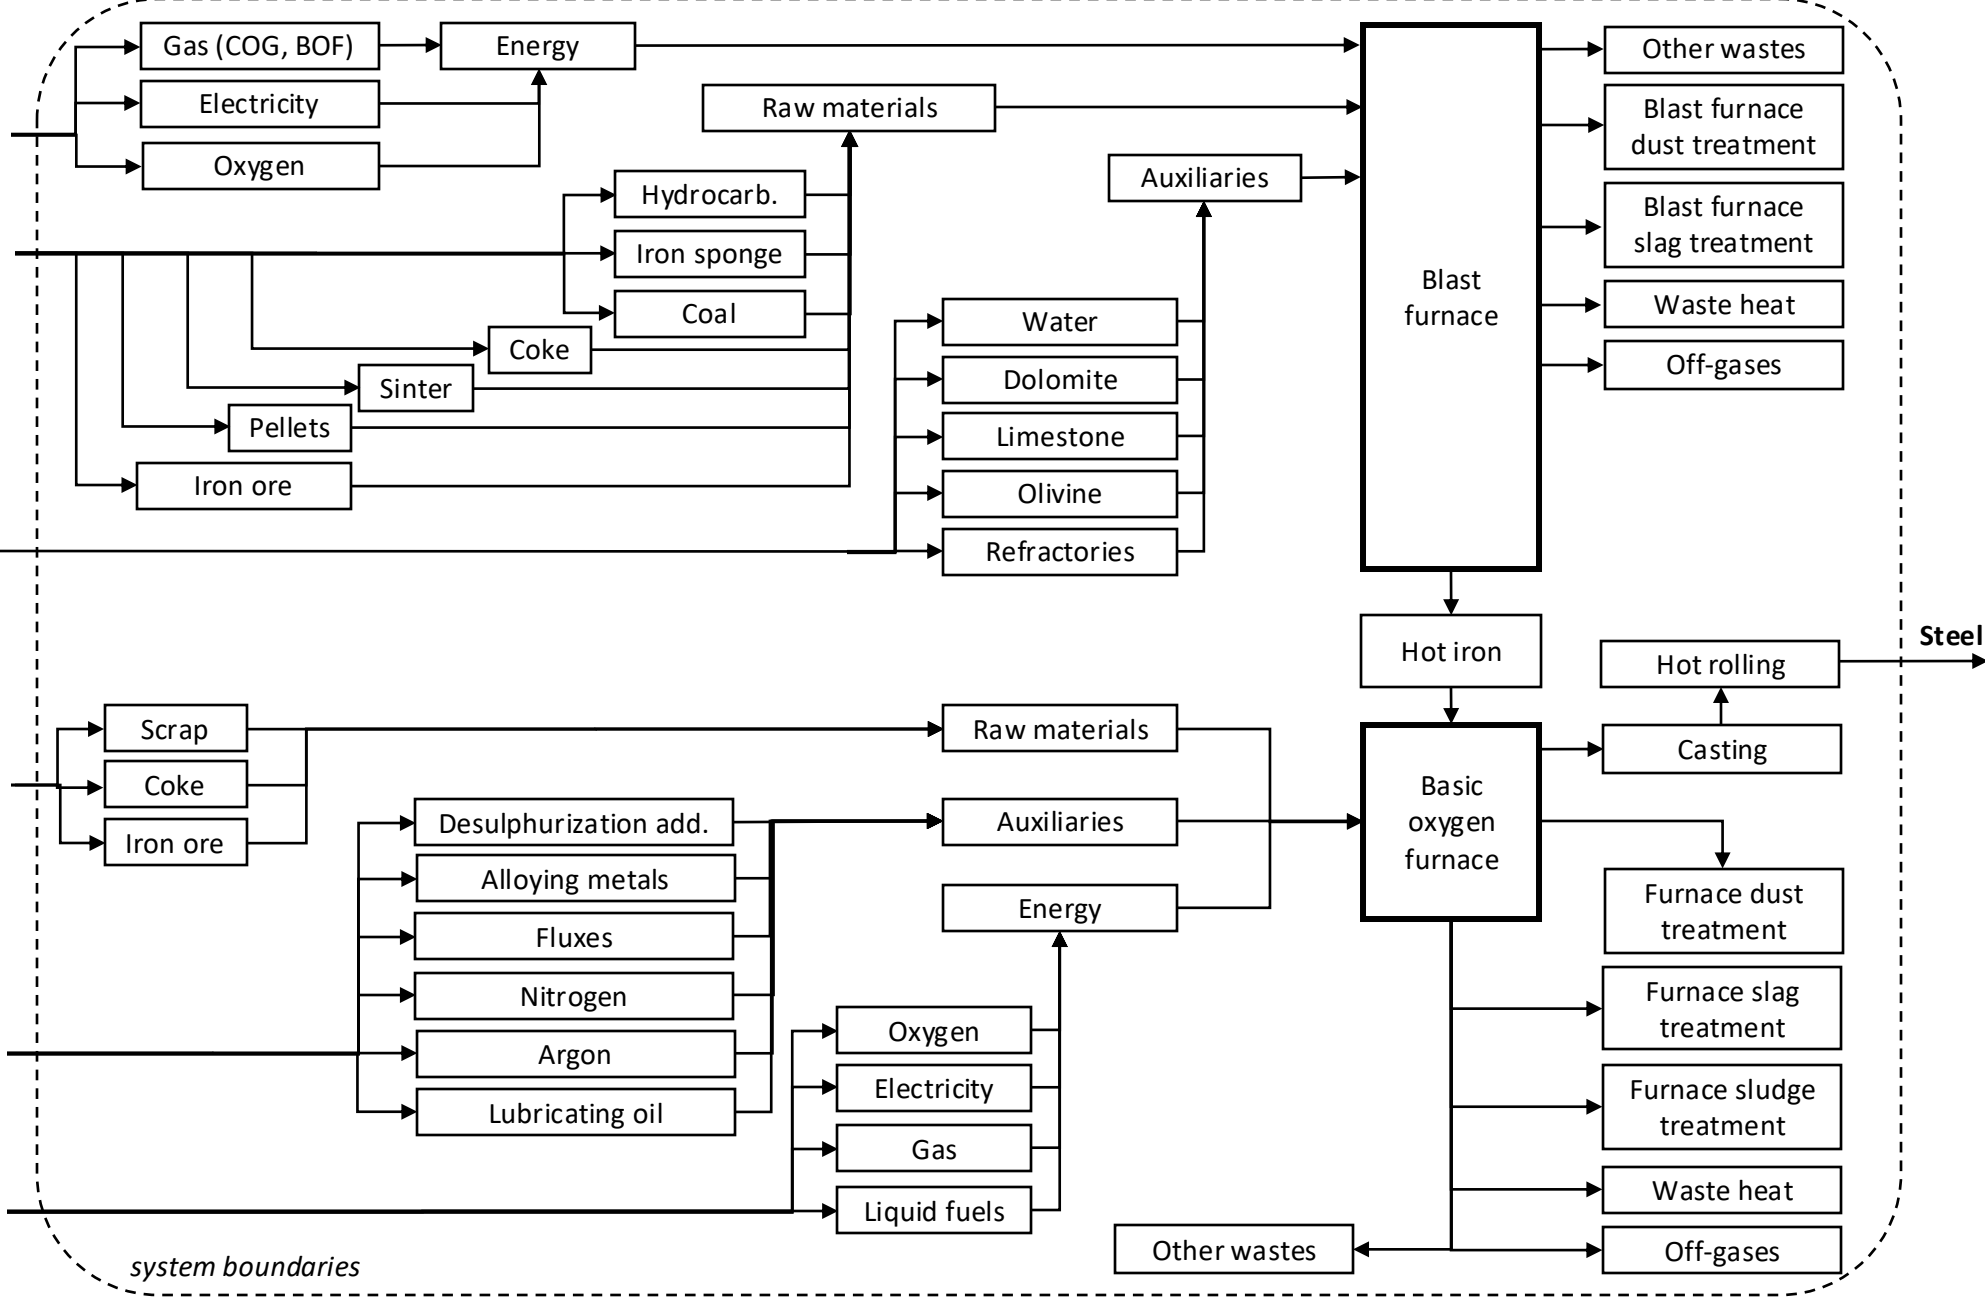

Supplement: Supplementary file 8 [file SM_fig_6_system_boundaries-BF-BOF-route.pdf › code/Figures/SM_figures/SM_fig_6_system_boundaries-BF-BOF-route.pdf]

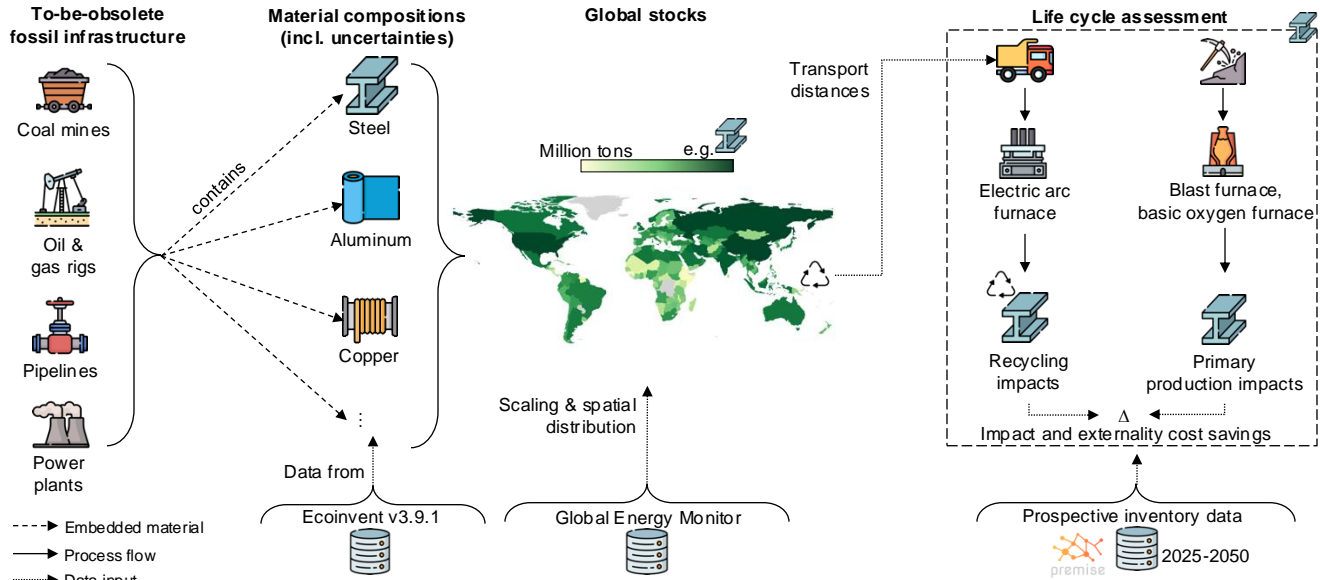

Supplement: Supplementary file 12 [file figure1.pdf › code/Figures/figure1.pdf]

**a**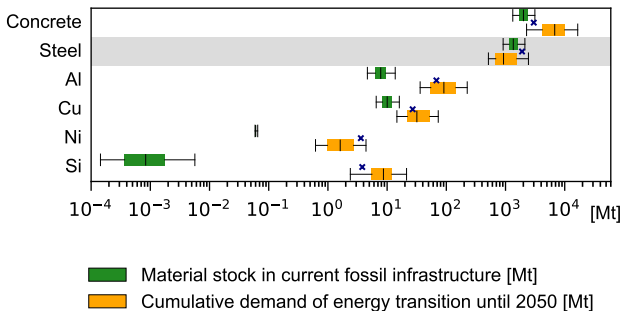**b**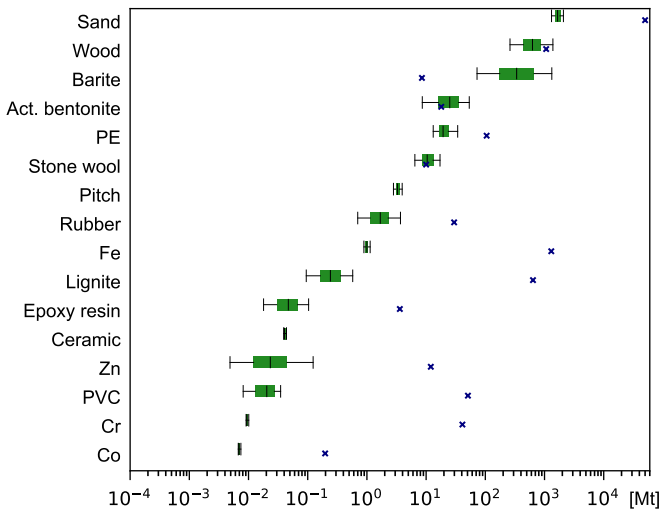

Supplement: Supplementary file 13 [file figure2.pdf › code/Figures/figure2.pdf]

**a**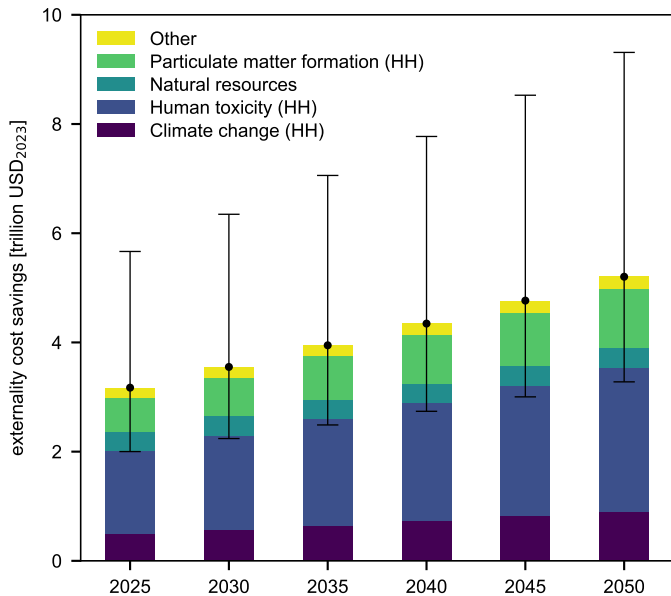**b**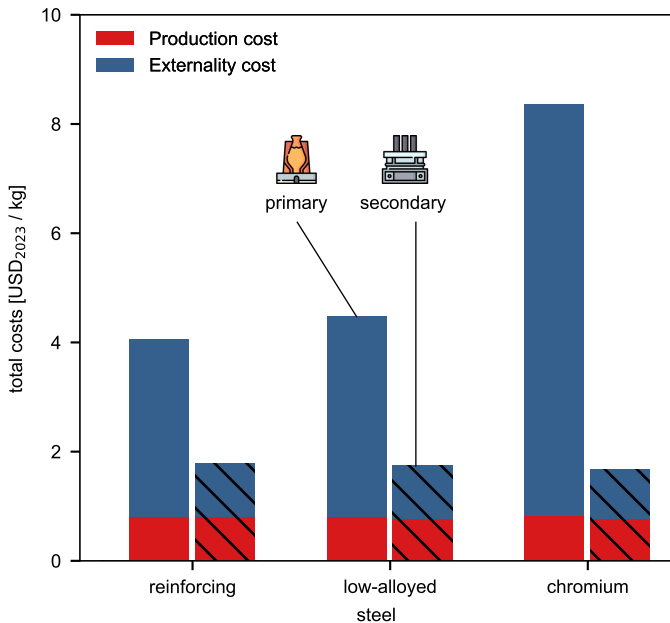

Supplement: Supplementary file 15 [file figure4_SSP2-NPi_optimistic.pdf › code/Figures/figure4_SSP2-NPi_optimistic.pdf]

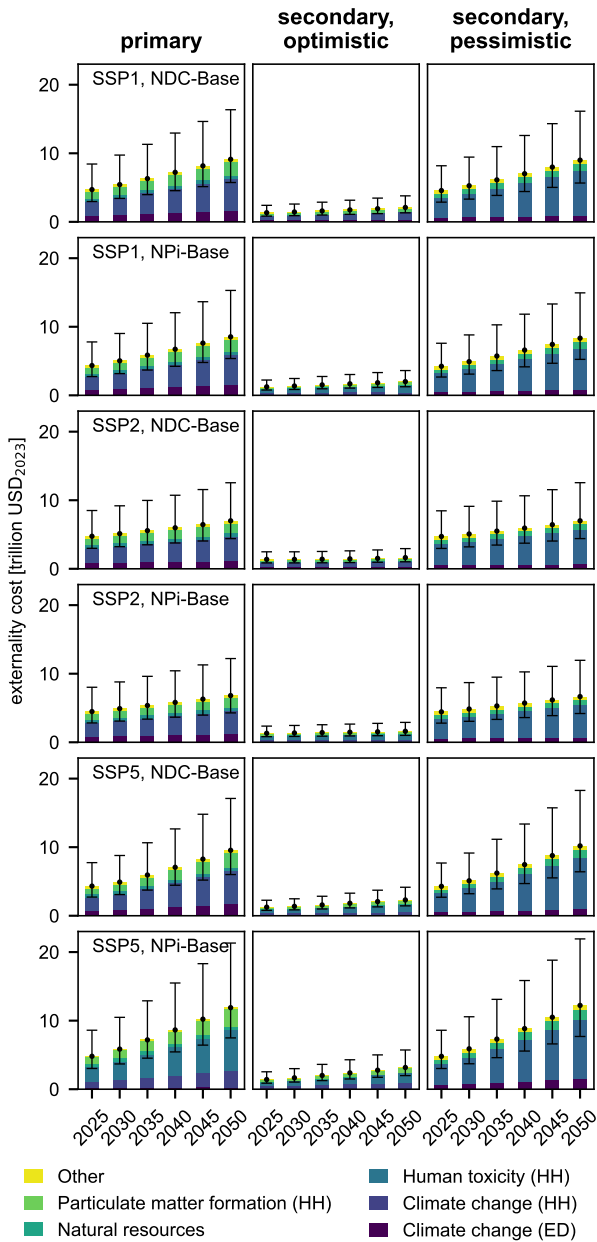

Supplement: Supplementary file 17 [file figure_E1.pdf › code/Figures/figure_E1.pdf]

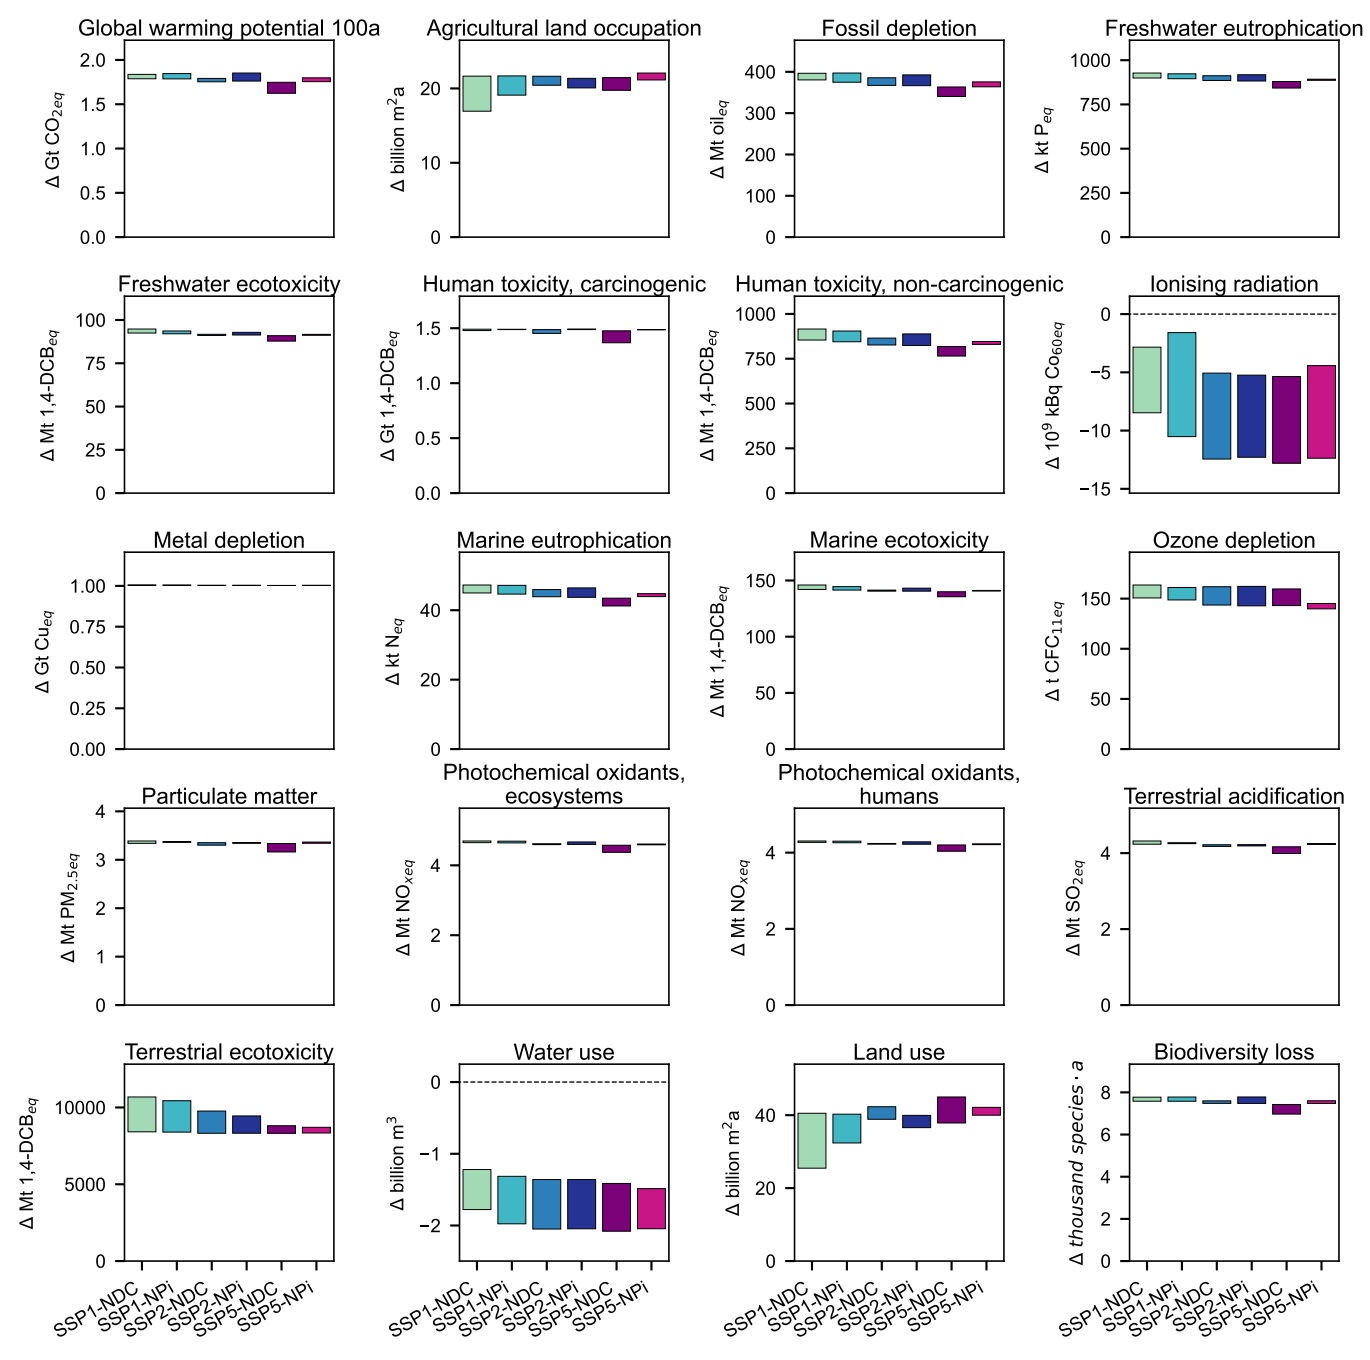

Supplement: Supplementary file 18 [file figure_E2_optimistic.pdf › code/Figures/figure_E2_optimistic.pdf]

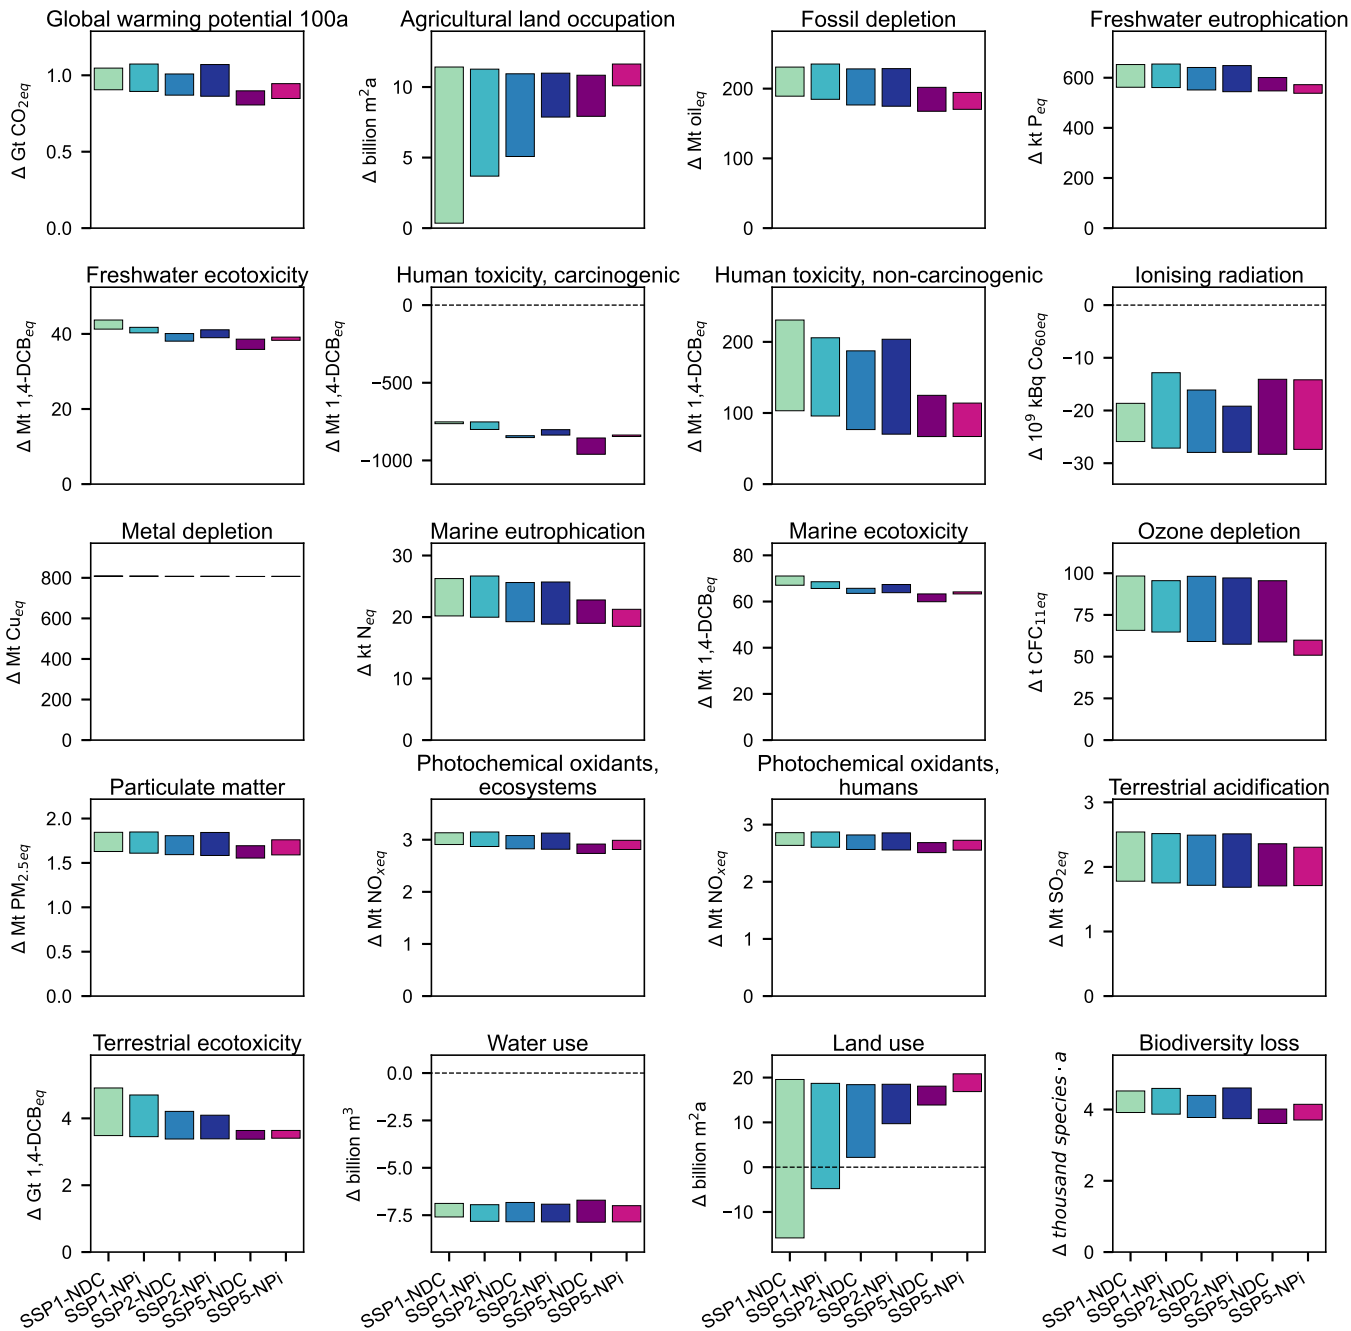

Supplement: Supplementary file 19 [file figure_E3_pessimistic.pdf › code/Figures/figure_E3_pessimistic.pdf]

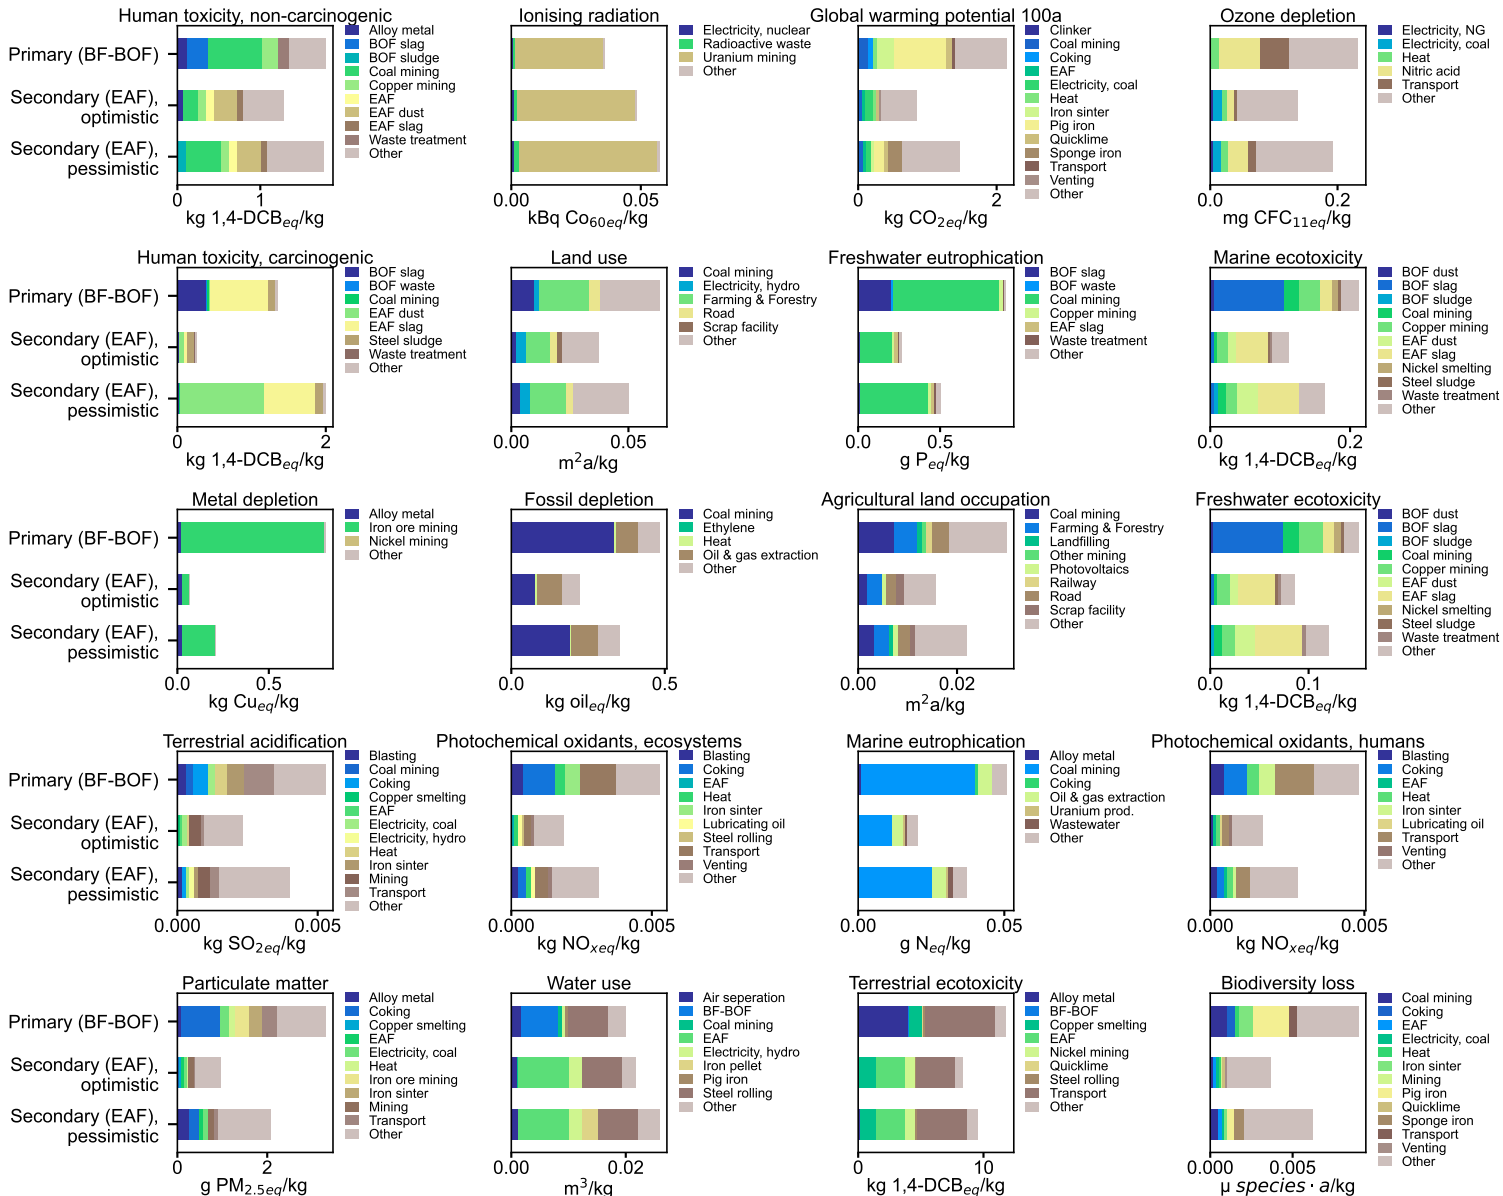

Supplement: Supplementary file 20 [file figure_E4_reinforcing_steel.pdf › code/Figures/figure_E4_reinforcing_steel.pdf]

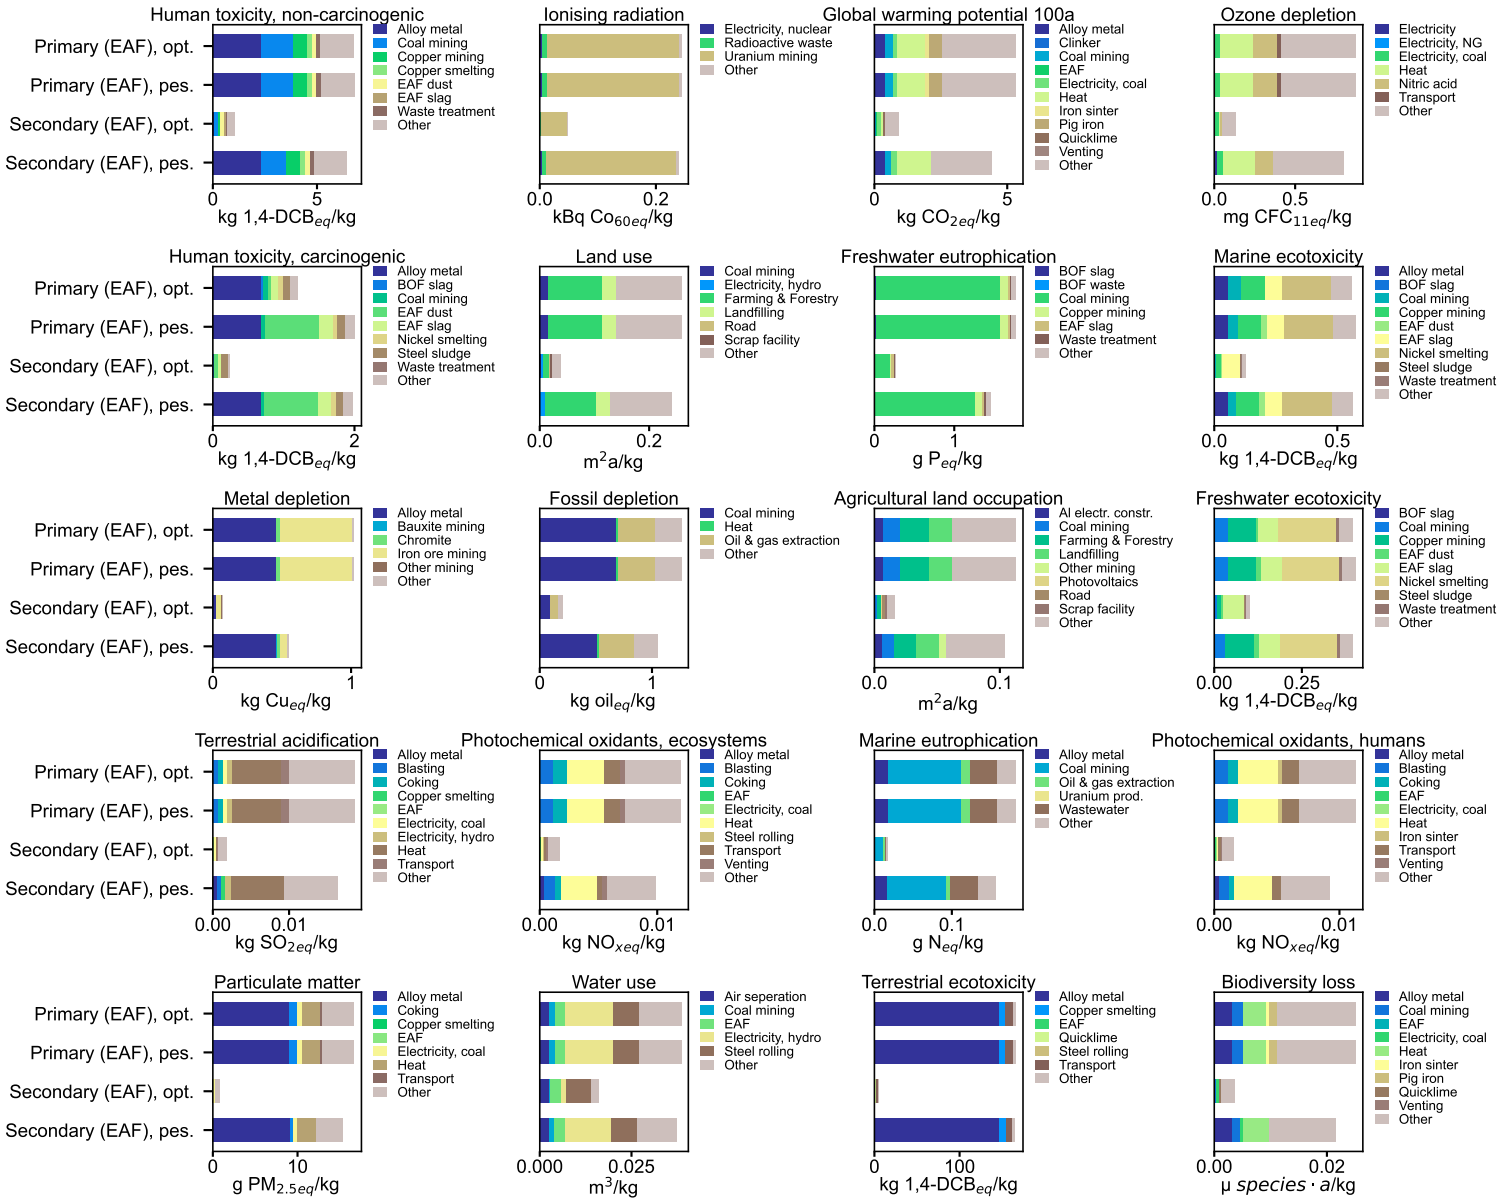

Supplement: Supplementary file 21 [file figure_E4_steel-chromium.pdf › code/Figures/figure_E4_steel-chromium.pdf]

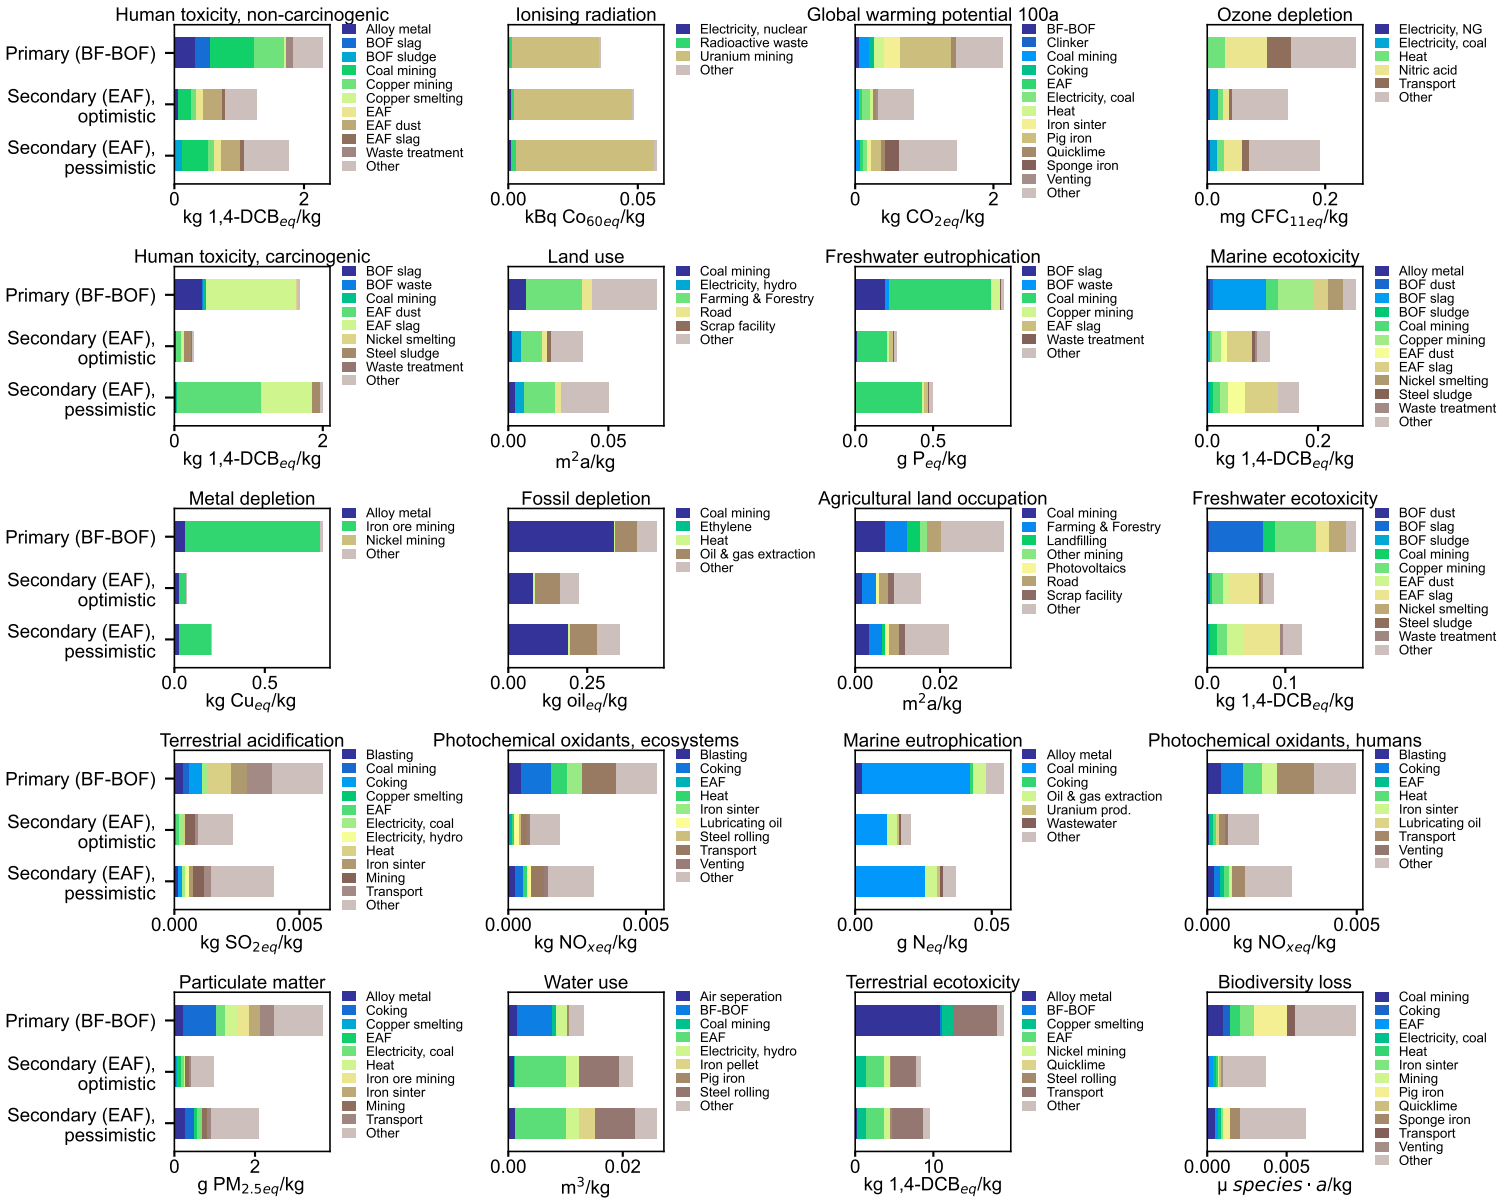

Supplement: Supplementary file 22 [file figure_E4_steel-low-alloyed.pdf › code/Figures/figure_E4_steel-low-alloyed.pdf]
